# Supplementary material
Source: PubMed Central journal article supplement (PMC2753674)
Supplement: NIHMS134733-supplement-SI1.pdf [file NIHMS134733-supplement-SI1.pdf]

| Accession Number | Sequence                                                                   | Observed Mass (Da) | Theoretical Mass (Da) | Mass Diff (Da) | Mass Diff (ppm) | Expectation Value |
|------------------|----------------------------------------------------------------------------|--------------------|-----------------------|----------------|-----------------|-------------------|
| P26599           | TDSSPNQARAQAALQAVNSVQSGNLALAASAAAVDAGMAMA<br>GQSPVLRRIIVENLFYPVTLVDLHQIFSK | 7105.67            | 7105.68               | -0.01          | -2.02           | 2.E-89            |
| P22626           | LFVGGIKEDTEEHHLRDYFEEYGKIDTIEITDRQSGK                                      | 4480.22            | 4480.22               | -0.01          | -1.11           | 2.E-89            |
| P06748           | VKLAADEDDEDDDEEDDEDDDDDFDDEEAEEKAPVKK                                      | 4472.61            | 4472.71               | -0.10          | -22.30          | 9.E-89            |
| P06748           | VKLAADEDDEDDDEEDDEDDDDDFDDEEAEEKAPVKK                                      | 4472.72            | 4472.71               | 0.01           | 2.61            | 9.E-89            |
| P06748           | VKLAADEDDEDDDEEDDEDDDDDFDDEEAEEKAPVKK                                      | 4472.72            | 4472.71               | 0.01           | 2.16            | 1.E-82            |
| P60709           | IWHHTFYNELRVAPEEHPVLLTEAPLNPK                                              | 3449.78            | 3449.79               | -0.01          | -3.85           | 1.E-76            |
| P60709           | IWHHTFYNELRVAPEEHPVLLTEAPLNPK                                              | 3449.78            | 3449.79               | -0.01          | -1.76           | 2.E-76            |
| Q6F113           | GNYAERVGAGAPVYMAAVLEYLTAEILELAGNAARDNKK                                    | 4108.03            | 4108.11               | -0.08          | -18.32          | 3.E-75            |
| Q6F113           | GNYAERVGAGAPVYMAAVLEYLTAEILELAGNAARDNKK                                    | 4108.10            | 4108.11               | -0.01          | -1.70           | 3.E-75            |
| O75531           | HRDFVAEPMGEKPVGSLAGIGEVLGK                                                 | 2692.40            | 2692.40               | 0.00           | -1.63           | 1.E-73            |
| P60709           | IWHHTFYNELRVAPEEHPVLLTEAPLNPK                                              | 3449.78            | 3449.79               | -0.01          | -3.99           | 5.E-72            |
| P60709           | IWHHTFYNELRVAPEEHPVLLTEAPLNPK                                              | 3450.71            | 3449.79               | 0.92           | 267.75          | 5.E-72            |
| P0C0S8           | GNYAERVGAGAPVYLAAVLEYLTAEILELAGNAARDNKK                                    | 4090.14            | 4090.15               | -0.01          | -1.80           | 5.E-71            |
| P60709           | IWHHTFYNELRVAPEEHPVLLTEAPLNPK                                              | 3449.78            | 3449.79               | -0.01          | -1.67           | 6.E-71            |

|        |                                         |         |         |       |        |        |
|--------|-----------------------------------------|---------|---------|-------|--------|--------|
| P60709 | IWHHTFYNELRVAPEEHPVLLTEAPLNPK           | 3449.78 | 3449.79 | -0.01 | -3.30  | 9.E-71 |
| P0C0S8 | GNYAERVGAGAPVYLAAVLEYLTAEILELAGNAARDNKK | 4090.15 | 4090.15 | 0.00  | 0.40   | 7.E-70 |
| P06748 | KVKLAADEDDEDDDEEDDEDDDDDFDDEEAEEKAPVKK  | 4600.81 | 4600.80 | 0.01  | 1.31   | 9.E-70 |
| P60709 | IWHHTFYNELRVAPEEHPVLLTEAPLNPK           | 3449.78 | 3449.79 | -0.01 | -2.51  | 1.E-69 |
| Q6F113 | GNYAERVGAGAPVYMAAVLEYLTAEILELAGNAARDNKK | 4108.10 | 4108.11 | -0.01 | -2.53  | 1.E-68 |
| P05783 | VIDDTNITRLQLETEIEALKEELLFMK             | 3203.69 | 3203.70 | -0.01 | -2.33  | 2.E-68 |
| P80723 | AQGPAASAECPKVEAPAANSQTVTVKE             | 2891.42 | 2891.41 | 0.01  | 2.04   | 3.E-66 |
| P06748 | LAADEDDEDDDEEDDEDDDDDFDDEEAEEK          | 3722.09 | 3722.19 | -0.10 | -25.97 | 5.E-66 |
| P06748 | LAADEDDEDDDEEDDEDDDDDFDDEEAEEK          | 3722.18 | 3722.19 | -0.01 | -3.86  | 5.E-66 |
| P22626 | LFVGGIKEDTEEHHLRDYFEEYKIDTIEIITDRQSGKK  | 4608.30 | 4608.31 | -0.01 | -2.05  | 5.E-66 |
| P02545 | AGQVVTIWAAGAGATHSPPTDLVWK               | 2532.26 | 2532.31 | -0.05 | -19.45 | 5.E-66 |
| P02545 | AGQVVTIWAAGAGATHSPPTDLVWK               | 2532.31 | 2532.31 | -0.01 | -1.99  | 5.E-66 |
| Q92841 | APILIATDVASRGLDVEDVK                    | 2081.11 | 2081.14 | -0.03 | -14.55 | 6.E-66 |
| Q92841 | APILIATDVASRGLDVEDVK                    | 2081.14 | 2081.14 | 0.00  | 0.64   | 6.E-66 |
| P02545 | AGQVVTIWAAGAGATHSPPTDLVWK               | 2532.26 | 2532.31 | -0.05 | -18.66 | 2.E-64 |

|        |                                          |         |         |       |         |        |
|--------|------------------------------------------|---------|---------|-------|---------|--------|
| P02545 | AGQVVTIWAAGAGATHSPPTDLVWK                | 2532.31 | 2532.31 | 0.00  | -1.91   | 2.E-64 |
| P09651 | IFVGGIKEDTEEHHLRDYFEQYGKIEVIEIMDRGSGK    | 4438.18 | 4438.19 | -0.01 | -1.52   | 7.E-64 |
| P04908 | GNYSERVGAGAPVYLAHVLEYLTAEILELAGNAARDNKK  | 4106.13 | 4106.14 | -0.01 | -1.43   | 1.E-63 |
| P06748 | LAADEDDEDDDEEDDEDDDDDDDFDDEEAEEK         | 3722.10 | 3722.19 | -0.09 | -24.82  | 2.E-63 |
| P60709 | IWHHTFYNELRVAPEEHPVLLTEAPLNPK            | 3449.78 | 3449.79 | -0.01 | -1.82   | 3.E-63 |
| P60709 | IWHHTFYNELRVAPEEHPVLLTEAPLNPK            | 3449.70 | 3449.79 | -0.09 | -25.91  | 3.E-63 |
| P06748 | LAADEDDEDDDEEDDEDDDDDDDFDDEEAEEK         | 3722.18 | 3722.19 | -0.01 | -2.06   | 3.E-63 |
| P07910 | GFAFVQYVNERNARA AVAGEDGRMIAGQVLDINLAAEPK | 4157.19 | 4160.12 | -2.93 | -704.38 | 2.E-62 |
| P07910 | GFAFVQYVNERNARA AVAGEDGRMIAGQVLDINLAAEPK | 4159.03 | 4160.12 | -1.10 | -263.27 | 2.E-62 |
| P07910 | GFAFVQYVNERNARA AVAGEDGRMIAGQVLDINLAAEPK | 4160.12 | 4160.12 | 0.00  | 0.28    | 2.E-62 |
| P07910 | GFAFVQYVNERNARA AVAGEDGRMIAGQVLDINLAAEPK | 4163.05 | 4160.12 | 2.93  | 704.88  | 2.E-62 |
| Q96QV6 | LLGGVTIAQGGVLPNIQAVLLPK                  | 2270.33 | 2270.37 | -0.04 | -16.88  | 1.E-61 |
| Q96QV6 | LLGGVTIAQGGVLPNIQAVLLPK                  | 2270.37 | 2270.37 | 0.00  | -1.24   | 1.E-61 |
| P69905 | VGAHAGEYGAEALERMFLSFPTTK                 | 2581.25 | 2581.26 | -0.01 | -2.11   | 3.E-61 |
| P06748 | KVKLAADEDDEDDDEEDDEDDDDDDDFDDEEAEEKAPVKK | 4600.80 | 4600.80 | 0.00  | -0.43   | 5.E-61 |

|        |                                                                                     |         |         |       |        |        |
|--------|-------------------------------------------------------------------------------------|---------|---------|-------|--------|--------|
| P06748 | VDNDENEHQLSLRTVSLGAGAKDELHIVEAEAMNYEGSPIK                                           | 4478.16 | 4478.17 | -0.01 | -3.28  | 6.E-61 |
| P06748 | VDNDENEHQLSLRTVSLGAGAKDELHIVEAEAMNYEGSPIK                                           | 4481.07 | 4478.17 | 2.90  | 647.41 | 1.E-60 |
| A5PLR1 | STELLIRKLPFQRLVREIAQDFKTDLRFQSSAVMALQEACEAY<br>LVGLFEDTNLCAIHAKRVTIMPKDIQLARRIRGERA | 9098.88 | 9098.88 | 0.00  | -0.46  | 6.E-60 |
| P60709 | IWHHTFYNELRVAPEEHPVLLTEAPLNPK                                                       | 3449.78 | 3449.79 | -0.01 | -2.92  | 2.E-59 |
| P04908 | LLGRVTIAQGGVLPNIQAVLLPK                                                             | 2369.45 | 2369.45 | 0.00  | -2.06  | 3.E-59 |
| P69905 | VGAHAGEYGAEALERMFLSFPTTK                                                            | 2581.21 | 2581.26 | -0.05 | -18.27 | 4.E-59 |
| P69905 | VGAHAGEYGAEALERMFLSFPTTK                                                            | 2581.26 | 2581.26 | 0.00  | -1.84  | 4.E-59 |
| A2BDF6 | STELLIRKLPFQRLVREIAQDFKTDLRFQSSAVMALQEASEAYL<br>VGLFEDTNLCAIHAKRVTIMPKDIQLARRIRGERA | 9082.92 | 9082.91 | 0.01  | 1.55   | 7.E-59 |
| P60709 | IWHHTFYNELRVAPEEHPVLLTEAPLNPK                                                       | 3449.79 | 3449.79 | 0.00  | -0.63  | 1.E-58 |
| A5PLR1 | STELLIRKLPFQRLVREIAQDFKTDLRFQSSAVMALQEACEAY<br>LVGLFEDTNLCAIHAKRVTIMPKDIQLARRIRGERA | 9098.70 | 9098.88 | -0.18 | -19.55 | 1.E-57 |
| A5PLR1 | STELLIRKLPFQRLVREIAQDFKTDLRFQSSAVMALQEACEAY<br>LVGLFEDTNLCAIHAKRVTIMPKDIQLARRIRGERA | 9098.86 | 9098.88 | -0.02 | -2.55  | 2.E-57 |
| P62841 | TFNQVEIKPEMIGHYLGFEFSITYKPVK                                                        | 3167.63 | 3167.64 | -0.01 | -2.40  | 4.E-57 |
| P22626 | SGNFGGSRNMGGPYGGGNYGPGGSGGGYGGRSRY                                                  | 3357.44 | 3357.44 | 0.00  | -0.89  | 7.E-57 |
| P05787 | LLEGEESRLESGMQNMSIHTK                                                               | 2388.14 | 2388.14 | 0.00  | -0.76  | 9.E-57 |
| P43243 | NLRYQLLQVLEPFQVISNHLILNK                                                            | 2820.59 | 2820.60 | -0.01 | -2.19  | 2.E-56 |

|        |                                          |         |         |       |         |        |
|--------|------------------------------------------|---------|---------|-------|---------|--------|
| P14866 | MAAAGGGGGGGRYGGGSEGGRAPK                 | 2197.01 | 2197.01 | 0.00  | 0.44    | 3.E-56 |
| P05787 | LLEGESRLESQMNSIHTK                       | 2388.14 | 2388.14 | 0.00  | -1.73   | 8.E-56 |
| P14866 | SERSSSGLLEWESKSDALETLGFLNHYQMK           | 3441.64 | 3441.65 | -0.01 | -2.74   | 2.E-55 |
| P0C0S8 | GNYAERVGAGAPVYLA AVLEYLTAEILELAGNAARDNKK | 4090.14 | 4090.15 | -0.01 | -2.16   | 2.E-55 |
| Q6FI13 | GNYAERVGAGAPVYMAAVLEYLTAEILELAGNAARDNKK  | 4108.03 | 4108.11 | -0.08 | -19.57  | 3.E-55 |
| P14866 | NRIQHPSNVLHFFNAPLEVTEENFFEICDELGVK       | 3984.94 | 3984.95 | -0.01 | -1.43   | 3.E-55 |
| Q6FI13 | GNYAERVGAGAPVYMAAVLEYLTAEILELAGNAARDNKK  | 4108.10 | 4108.11 | -0.01 | -2.53   | 4.E-55 |
| P25205 | (41)AGTVVLDDELREARQDYLDLDFLDEEDQGIIYQSK  | 3985.76 | 3985.87 | -0.11 | -27.32  | 9.E-55 |
| P25205 | (41)AGTVVLDDELREARQDYLDLDFLDEEDQGIIYQSK  | 3985.85 | 3985.87 | -0.02 | -5.71   | 2.E-54 |
| P09651 | GGNFGGRSSGPYGGGGQYFAK                    | 2019.92 | 2019.92 | 0.00  | -2.37   | 2.E-54 |
| P04908 | LLGRVTIAQGGVLPNIQAVLLPK                  | 2368.28 | 2369.45 | -1.17 | -494.95 | 4.E-54 |
| P04908 | LLGRVTIAQGGVLPNIQAVLLPK                  | 2369.38 | 2369.45 | -0.07 | -28.82  | 6.E-54 |
| P04908 | LLGRVTIAQGGVLPNIQAVLLPK                  | 2369.44 | 2369.45 | -0.01 | -2.86   | 6.E-54 |
| Q7L4M3 | GQRASLEAAIADAEQRGELAIAK                  | 2296.17 | 2296.21 | -0.04 | -17.62  | 1.E-53 |
| P20700 | SLEGDLEDLKDQIAQLEASLAAAKK                | 2655.40 | 2655.40 | 0.00  | -1.52   | 1.E-53 |

|        |                                          |         |         |       |         |        |
|--------|------------------------------------------|---------|---------|-------|---------|--------|
| P20700 | SLEGDLEDLKDQIAQLEASLAAAKK                | 2659.53 | 2655.40 | 4.13  | 1553.27 | 1.E-53 |
| P33778 | AMGIMNSFVNDIFERIAGEASRLAHYNK             | 3153.19 | 3153.55 | -0.36 | -113.21 | 1.E-53 |
| P33778 | AMGIMNSFVNDIFERIAGEASRLAHYNK             | 3153.54 | 3153.55 | -0.01 | -4.62   | 1.E-53 |
| P09651 | GGNFGGRSSGPYGGGGQYFAK                    | 2019.92 | 2019.92 | 0.00  | -0.84   | 1.E-53 |
| Q7L4M3 | GQRASLEAAIADAEQRGELAIAK                  | 2296.21 | 2296.21 | 0.00  | -1.81   | 1.E-53 |
| P09651 | IFVGGIKEDTEEHHLRDYFEQYGK                 | 2909.39 | 2909.40 | -0.01 | -1.74   | 2.E-53 |
| P09651 | IFVGGIKEDTEEHHLRDYFEQYGK                 | 2913.35 | 2909.40 | 3.95  | 1354.26 | 3.E-53 |
| P46777 | HIMGQNVADYMRYLMEEDEDAYKK                 | 2948.30 | 2948.31 | -0.01 | -2.33   | 7.E-53 |
| P07910 | GFAFVQYVNERNARA AVAGEDGRMIAGQVLDINLAAEPK | 4160.12 | 4160.12 | 0.00  | -1.07   | 1.E-52 |
| P43243 | NLRYQLLQLVEPFGVISNHLILNK                 | 2820.59 | 2820.60 | -0.01 | -1.98   | 1.E-52 |
| P09651 | GGNFGGRSSGPYGGGGQYFAK                    | 2019.88 | 2019.92 | -0.04 | -22.23  | 1.E-52 |
| Q6F113 | GNYAERVGAGAPVYMAAVLEYLTAEILELAGNAARDNKK  | 4107.04 | 4108.11 | -1.07 | -261.72 | 1.E-52 |
| Q6F113 | GNYAERVGAGAPVYMAAVLEYLTAEILELAGNAARDNKK  | 4108.10 | 4108.11 | -0.01 | -1.77   | 1.E-52 |
| P33778 | AMGIMNSFVNDIFERIAGEASRLAHYNK             | 3153.54 | 3153.55 | -0.01 | -3.95   | 2.E-52 |
| P09651 | KIFVGGIKEDTEEHHLRDYFEQYKIEVIEIMTDRGSGK   | 4566.29 | 4566.29 | 0.00  | -0.82   | 2.E-52 |

|        |                                                                                     |         |         |       |        |        |
|--------|-------------------------------------------------------------------------------------|---------|---------|-------|--------|--------|
| P09651 | GGNFGGRSSGPYGGGGQYFAK                                                               | 2019.92 | 2019.92 | 0.00  | -2.23  | 2.E-52 |
| Q7L4M3 | GQRASLEAAIADAEQRGELAIAK                                                             | 2296.17 | 2296.21 | -0.04 | -16.58 | 3.E-52 |
| Q7L4M3 | GQRASLEAAIADAEQRGELAIAK                                                             | 2296.21 | 2296.21 | 0.00  | -1.51  | 3.E-52 |
| P22626 | LFVGGIKEDTEEHHLRDYFEEYGGKIDTIEITDRQSGKK                                             | 4608.30 | 4608.31 | -0.01 | -2.38  | 3.E-52 |
| P22626 | RSRGGFGVTFSSMAEVDAAAMAARPHSIDGRVVEPK                                                | 3777.88 | 3777.88 | 0.00  | -0.21  | 6.E-52 |
| Q6FI13 | GNYAERVGAGAPVYMAAVLEYLTAIEILELAGNAARDNKK                                            | 4108.02 | 4108.11 | -0.09 | -21.80 | 7.E-52 |
| Q6FI13 | GNYAERVGAGAPVYMAAVLEYLTAIEILELAGNAARDNKK                                            | 4108.10 | 4108.11 | -0.01 | -2.84  | 7.E-52 |
| A2BDF6 | STELLIRKLPFQRLVREIAQDFKTDLRFQSSAVMALQEASEAYL<br>VGLFEDTNLCAIHAKRVTIMPKDIQLARRIRGERA | 9082.94 | 9082.91 | 0.03  | 3.13   | 1.E-51 |
| A2BDF6 | STELLIRKLPFQRLVREIAQDFKTDLRFQSSAVMALQEASEAYL<br>VGLFEDTNLCAIHAKRVTIMPKDIQLARRIRGERA | 9083.73 | 9082.91 | 0.82  | 90.75  | 1.E-51 |
| P09651 | GGNFGGRSSGPYGGGGQYFAK                                                               | 2019.91 | 2019.92 | -0.01 | -2.52  | 2.E-51 |
| P60709 | IWHHTFYNELRVAPEEHPVLLTEAPLNPK                                                       | 3449.78 | 3449.79 | -0.01 | -3.91  | 2.E-51 |
| P08670 | TVETRDGQVINETSQHDDLE                                                                | 2422.10 | 2422.10 | 0.00  | -1.96  | 3.E-51 |
| P08670 | TVETRDGQVINETSQHDDLE                                                                | 2422.05 | 2422.10 | -0.05 | -18.64 | 3.E-51 |
| Q6FI13 | GNYAERVGAGAPVYMAAVLEYLTAIEILELAGNAARDNKK                                            | 4108.10 | 4108.11 | -0.01 | -1.60  | 4.E-51 |
| A2BDF6 | STELLIRKLPFQRLVREIAQDFKTDLRFQSSAVMALQEASEAYL<br>VGLFEDTNLCAIHAKRVTIMPKDIQLARRIRGERA | 9082.90 | 9082.91 | -0.01 | -1.08  | 9.E-51 |

|        |                                                                                     |         |         |       |        |        |
|--------|-------------------------------------------------------------------------------------|---------|---------|-------|--------|--------|
| A2BDF6 | STELLIRKLPFQRLVREIAQDFKTDLRFQSSAVMALQEASEAYL<br>VGLFEDTNLCAIHAKRVTIMPKDIQLARRIRGERA | 9082.72 | 9082.91 | -0.19 | -21.24 | 2.E-50 |
| A2BDF6 | STELLIRKLPFQRLVREIAQDFKTDLRFQSSAVMALQEASEAYL<br>VGLFEDTNLCAIHAKRVTIMPKDIQLARRIRGERA | 9082.92 | 9082.91 | 0.01  | 0.94   | 2.E-50 |
| P04908 | LLGRVTIAQGGVLPNIQAVLLPK                                                             | 2369.35 | 2369.45 | -0.10 | -41.52 | 3.E-50 |
| P04908 | LLGRVTIAQGGVLPNIQAVLLPK                                                             | 2369.38 | 2369.45 | -0.07 | -29.91 | 3.E-50 |
| P04908 | LLGRVTIAQGGVLPNIQAVLLPK                                                             | 2369.44 | 2369.45 | -0.01 | -3.15  | 3.E-50 |
| P04908 | LLGRVTIAQGGVLPNIQAVLLPK                                                             | 2369.50 | 2369.45 | 0.05  | 20.31  | 3.E-50 |
| P60709 | IWHHTFYNELRVAPEEHPVLLTEAPLNPK                                                       | 3449.78 | 3449.79 | -0.01 | -3.50  | 3.E-50 |
| P60903 | PSQMEHAMETMMFTFHK                                                                   | 2081.88 | 2081.88 | 0.00  | -1.41  | 5.E-50 |
| P60709 | IWHHTFYNELRVAPEEHPVLLTEAPLNPK                                                       | 3449.79 | 3449.79 | 0.00  | -1.38  | 6.E-50 |
| P07355 | GRRRAEDGSVIDYELIDQDARDLYDAGVK                                                       | 3138.47 | 3138.52 | -0.05 | -15.52 | 7.E-50 |
| P07355 | GRRRAEDGSVIDYELIDQDARDLYDAGVK                                                       | 3138.52 | 3138.52 | 0.00  | -0.16  | 7.E-50 |
| A5PLR1 | STELLIRKLPFQRLVREIAQDFKTDLRFQSSAVMALQEACEAY<br>LVGLFEDTNLCAIHAKRVTIMPKDIQLARRIRGERA | 9098.92 | 9098.88 | 0.04  | 4.34   | 9.E-50 |
| P05787 | AQYEDIANRSRAEAESMYQIKYEELQSLAGK                                                     | 3590.72 | 3590.73 | -0.01 | -3.31  | 1.E-49 |
| P60709 | RGILTLKYP(317)HGIVTNWDDMEK                                                          | 2741.36 | 2741.42 | -0.06 | -20.42 | 1.E-49 |
| P60709 | RGILTLKYP(317)HGIVTNWDDMEK                                                          | 2741.42 | 2741.42 | 0.00  | -1.71  | 1.E-49 |



|        |                                                                                    |         |         |       |        |        |
|--------|------------------------------------------------------------------------------------|---------|---------|-------|--------|--------|
| A5PLR1 | STELLIRKLPFQRLVREIAQDFKTDLRFQSSAVMALQEACEAY<br>LVGLFEDTNLCAIHAKRVTIMPKDIQLARRIGERA | 9098.88 | 9098.88 | 0.00  | 0.16   | 3.E-49 |
| P04908 | GNYSERVGAGAPVYLAHVLELYLTAEILELAGNAARDNKK                                           | 4106.13 | 4106.14 | -0.01 | -1.43  | 3.E-49 |
| Q6FI13 | GNYAERVGAGAPVYMAAVLELYLTAEILELAGNAARDNKK                                           | 4108.02 | 4108.11 | -0.09 | -22.58 | 3.E-49 |
| Q6FI13 | GNYAERVGAGAPVYMAAVLELYLTAEILELAGNAARDNKK                                           | 4108.10 | 4108.11 | -0.01 | -3.11  | 3.E-49 |
| P08670 | TVETRDGQVINETSQHDDLE                                                               | 2422.10 | 2422.10 | 0.00  | -1.75  | 4.E-49 |
| Q6FI13 | GNYAERVGAGAPVYMAAVLELYLTAEILELAGNAARDNKK                                           | 4108.10 | 4108.11 | -0.01 | -2.04  | 5.E-49 |
| P08758 | YMTISGFQIEETIDRETSGNLEQLLAVVK                                                      | 3396.74 | 3396.75 | -0.01 | -2.86  | 5.E-49 |
| P08670 | TVETRDGQVINETSQHDDLE                                                               | 2422.06 | 2422.10 | -0.04 | -17.32 | 8.E-49 |
| P60903 | PSQMEHAMETMMFTFHK                                                                  | 2081.88 | 2081.88 | 0.00  | -1.17  | 2.E-48 |
| Q14978 | (41)ADAGIRRVVPSDLYPLVLGFLRDNQLSEVANK                                               | 3566.91 | 3566.92 | -0.01 | -2.10  | 2.E-48 |
| P60903 | PSQMEHAMETMMFTFHK                                                                  | 2081.85 | 2081.88 | -0.03 | -14.91 | 2.E-48 |
| P62241 | TRIIDVVYNASNNELVRTK                                                                | 2204.19 | 2204.19 | 0.00  | -0.96  | 3.E-48 |
| P62805 | VFLENVIRDAVITYTEHAK                                                                | 2104.09 | 2104.10 | -0.01 | -2.74  | 4.E-48 |
| P22626 | KLFVGGIKEDTEEHHLRDYFEEYGKIDTIEIITDRQSGK                                            | 4608.30 | 4608.31 | -0.01 | -2.87  | 4.E-48 |
| Q7L4M3 | GQRASLEAAIADAEQRGELAIAK                                                            | 2296.21 | 2296.21 | 0.00  | -1.25  | 6.E-48 |

|        |                                                |         |         |       |          |        |
|--------|------------------------------------------------|---------|---------|-------|----------|--------|
| P61978 | ALRTDYNASVSPDSSGPERILSISADIETIGEILKK           | 3944.06 | 3944.07 | -0.01 | -2.40    | 7.E-48 |
| P09651 | GGNFGGRSSGPYGGGGQYFAK                          | 2019.88 | 2019.92 | -0.04 | -19.80   | 9.E-48 |
| P09651 | GGNFGGRSSGPYGGGGQYFAK                          | 2019.92 | 2019.92 | -0.01 | -2.47    | 9.E-48 |
| P05783 | VIDDTNITRLQLETEIEALKEELLFMKK                   | 3331.78 | 3331.79 | -0.01 | -2.26    | 2.E-47 |
| P07355 | GRRRAEDGSVIDYELIDQDARDLYDAGVK                  | 3138.41 | 3138.52 | -0.11 | -35.02   | 4.E-47 |
| P07355 | GRRRAEDGSVIDYELIDQDARDLYDAGVK                  | 3138.51 | 3138.52 | -0.01 | -3.16    | 4.E-47 |
| P60709 | DLYANTVLSGGTTMYPGIADRMQK                       | 2597.38 | 2601.26 | -3.88 | -1494.27 | 6.E-47 |
| P22626 | SGNFGGSRNMGGPYGGGNYGPGGSGGSGGYGGRSRY           | 3357.43 | 3357.44 | -0.01 | -1.93    | 9.E-47 |
| P60709 | DLYANTVLSGGTTMYPGIADRMQK                       | 2601.26 | 2601.26 | -0.01 | -1.92    | 1.E-46 |
| Q13813 | IAALQAFADQLIAAGHYAK                            | 1971.06 | 1971.06 | 0.00  | -1.95    | 1.E-46 |
| Q13813 | IAALQAFADQLIAAGHYAK                            | 1973.17 | 1971.06 | 2.11  | 1067.50  | 1.E-46 |
| P22626 | LFIGGLSFETTEESLRNYEQWGK                        | 2866.37 | 2866.38 | -0.01 | -2.70    | 2.E-46 |
| P60709 | DLYANTVLSGGTTMYPGIADRMQK                       | 2599.17 | 2601.26 | -2.09 | -802.56  | 2.E-46 |
| P0C0S8 | VTIAQGGVLPNIQAVLLPK                            | 1930.16 | 1930.16 | 0.00  | -0.87    | 2.E-46 |
| A6NMY7 | SSGPPPPSGSSGSEAAAGAGAAAPASQHPATGTGAVQTEAM<br>K | 3702.72 | 3702.72 | 0.00  | 0.73     | 3.E-46 |

|        |                                                      |         |         |       |        |        |
|--------|------------------------------------------------------|---------|---------|-------|--------|--------|
| P08670 | TVETRDGQVINETSQHDDLE                                 | 2422.10 | 2422.10 | 0.00  | -1.79  | 3.E-46 |
| P62805 | VFLENVIRDAVITYTEHAK                                  | 2104.05 | 2104.10 | -0.05 | -26.03 | 4.E-46 |
| P62805 | VFLENVIRDAVITYTEHAK                                  | 2104.09 | 2104.10 | -0.01 | -2.55  | 4.E-46 |
| P08670 | TVETRDGQVINETSQHDDLE                                 | 2422.06 | 2422.10 | -0.04 | -17.85 | 4.E-46 |
| P05783 | YWSQQIEESTTVVTTQSAEVGAAETTLTELRRTVQSLEIDLDS<br>MRNLK | 5426.71 | 5426.72 | -0.01 | -1.33  | 4.E-46 |
| P60709 | DLYANTVLSGGTTMYPGIADRMQK                             | 2601.26 | 2601.26 | 0.00  | -1.84  | 5.E-46 |
| P22626 | KLFVGGIKEDTEEHHLRDYFEEYGKIDTIEIITDRQSGKK             | 4736.41 | 4736.41 | 0.00  | -0.42  | 5.E-46 |
| P05787 | AQYEDIANRSRAEAESMYQIKYEELQSLAGK                      | 3590.72 | 3590.73 | -0.01 | -1.89  | 6.E-46 |
| P06748 | TPKTPKGPSSVEDIKAKMQASIEK                             | 2569.38 | 2569.38 | 0.00  | 1.09   | 7.E-46 |
| Q14978 | (41)ADAGIRRVVPSDLYPLVLGFLRDNQLSEVANK                 | 3566.91 | 3566.92 | -0.01 | -2.07  | 7.E-46 |
| Q14978 | (41)ADAGIRRVVPSDLYPLVLGFLRDNQLSEVANK                 | 3567.85 | 3566.92 | 0.93  | 261.00 | 7.E-46 |
| P08670 | TVETRDGQVINETSQHDDLE                                 | 2422.10 | 2422.10 | 0.00  | 0.89   | 1.E-45 |
| P09651 | RSRGFGFVTYATVEEVDAAMNARPHK                           | 2908.39 | 2908.44 | -0.05 | -16.02 | 1.E-45 |
| P09651 | RSRGFGFVTYATVEEVDAAMNARPHK                           | 2908.44 | 2908.44 | 0.00  | -1.68  | 1.E-45 |
| P09651 | RSRGFGFVTYATVEEVDAAMNARPHK                           | 2908.58 | 2908.44 | 0.14  | 48.69  | 1.E-45 |

|        |                                                                                     |         |         |       |        |        |
|--------|-------------------------------------------------------------------------------------|---------|---------|-------|--------|--------|
| P60709 | RGILTLKYPIE(317)HGIVTNWDDMEK                                                        | 2741.41 | 2741.42 | -0.01 | -2.33  | 2.E-45 |
| P06748 | NCFRMTDQEIQLWQWRK                                                                   | 2467.15 | 2467.15 | 0.00  | -1.10  | 2.E-45 |
| P22626 | LFVGGIKEDTEEHHLRDYFEEYGKIDTIEIITDRQSGK                                              | 4480.23 | 4480.22 | 0.01  | 2.35   | 2.E-45 |
| P07910 | GFAFVQYVNERNARA AVAGEDGRMIAGQVLDINLAAEPK                                            | 4160.12 | 4160.12 | 0.00  | -1.07  | 3.E-45 |
| P0C0S8 | VTIAQGGVLPNIQAVLLPK                                                                 | 1930.13 | 1930.16 | -0.03 | -14.03 | 4.E-45 |
| P0C0S8 | VTIAQGGVLPNIQAVLLPK                                                                 | 1930.16 | 1930.16 | 0.00  | -0.46  | 4.E-45 |
| P09651 | GGNFGGRSSGPYGGGGQYFAK                                                               | 2019.92 | 2019.92 | 0.00  | -1.98  | 4.E-45 |
| P22626 | KLFVGGIKEDTEEHHLRDYFEEYGKIDTIEIITDRQSGK                                             | 4608.32 | 4608.31 | 0.01  | 1.14   | 6.E-45 |
| P06748 | KVKLAADEDDEDDDEEDDEDDDDDFDDEEAEEKAPVKK                                              | 4600.81 | 4600.80 | 0.01  | 2.48   | 6.E-45 |
| Q6FI13 | GNYAERVGAGAPVYMAAVLEYLTAEILELAGNAARDNKK                                             | 4108.02 | 4108.11 | -0.09 | -21.42 | 1.E-44 |
| Q6FI13 | GNYAERVGAGAPVYMAAVLEYLTAEILELAGNAARDNKK                                             | 4108.10 | 4108.11 | -0.01 | -1.75  | 1.E-44 |
| P62316 | SEMTPEELQKREEEEFNTGPLSVLTQSVK                                                       | 3335.66 | 3334.62 | 1.04  | 311.00 | 2.E-44 |
| P07910 | GFAFVQYVNERNARA AVAGEDGRMIAGQVLDINLAAEPK                                            | 4160.11 | 4160.12 | -0.01 | -2.13  | 2.E-44 |
| A5PLR1 | STELLIRKLPFQRLVREIAQDFKTDLRFQSSAVMALQEACEAY<br>LVGLFEDTNLCAIHAKRVTIMPKDIQLARRIRGERA | 9098.87 | 9098.88 | -0.01 | -0.75  | 3.E-44 |
| P22626 | SGNFGGSRNMGGPYGGGNYGPGSGSGGGYGGRSRY                                                 | 3357.43 | 3357.44 | -0.01 | -1.85  | 3.E-44 |

|        |                                                                                     |         |         |       |        |        |
|--------|-------------------------------------------------------------------------------------|---------|---------|-------|--------|--------|
| A5PLR1 | STELLIRKLPFQRLVREIAQDFKTDLRFQSSAVMALQEACEAY<br>LVGLFEDTNLCAIHAKRVTIMPKDIQLARRIRGERA | 9098.88 | 9098.88 | 0.00  | -0.09  | 3.E-44 |
| P20674 | EIYPYVIQELRPTLNELGISTPEELGLDKV                                                      | 3427.81 | 3427.81 | 0.00  | -0.32  | 3.E-44 |
| Q53HU8 | LLEGEESRISLPLPNFSSLNLRETNLDSLPLVDTHSK                                               | 4133.15 | 4133.16 | -0.01 | -2.49  | 4.E-44 |
| P22626 | LFVGGIKEDTEEHHLRDYFEEYGGKIDTIEIITDRQSGK                                             | 4480.20 | 4480.22 | -0.02 | -3.86  | 4.E-44 |
| P80723 | AQGPAASAEKPKVEAPAANSQTVTVKE                                                         | 2891.42 | 2891.41 | 0.01  | 1.90   | 4.E-44 |
| P07910 | GFAFVQYVNERNARA AVAGEDGRMIAGQVLDINLAAEPK                                            | 4160.11 | 4160.12 | -0.01 | -1.31  | 4.E-44 |
| P22626 | SGNFGGSRNMGGPYGGGNYGPGGSGGGYGGRSRY                                                  | 3357.43 | 3357.44 | -0.01 | -2.65  | 6.E-44 |
| P22626 | KLFVGGIKEDTEEHHLRDYFEEYGGK                                                          | 3038.48 | 3038.48 | 0.00  | -0.80  | 9.E-44 |
| P09651 | RSRGFGFVTYATVEEVDAAMNARPHK                                                          | 2908.44 | 2908.44 | 0.00  | -1.10  | 9.E-44 |
| P09651 | RSRGFGFVTYATVEEVDAAMNARPHK                                                          | 2909.39 | 2908.44 | 0.95  | 328.04 | 9.E-44 |
| P25398 | (41)AEEGIAAGGVM DVNTALQEVLK                                                         | 2256.12 | 2256.13 | -0.01 | -2.37  | 1.E-43 |
| P22626 | KLFVGGIKEDTEEHHLRDYFEEYGGKIDTIEIITDRQSGK                                            | 4608.30 | 4608.31 | -0.02 | -3.26  | 2.E-43 |
| Q14978 | (41)ADAGIRRVVPSDLYPLVLGFLRDNLSEVANK                                                 | 3566.91 | 3566.92 | -0.01 | -2.43  | 2.E-43 |
| P17096 | KLEKEEEEGISQESSEEEQ                                                                 | 2235.98 | 2235.99 | -0.01 | -2.38  | 2.E-43 |
| P25398 | (41)AEEGIAAGGVM DVNTALQEVLK                                                         | 2256.08 | 2256.13 | -0.05 | -21.61 | 2.E-43 |

|        |                                                                                     |         |         |       |         |        |
|--------|-------------------------------------------------------------------------------------|---------|---------|-------|---------|--------|
| P60709 | SYELPDGQVITIGNERFRCPEALFQPSFLGMESCGIHETTFFNS<br>IMK                                 | 5191.45 | 5191.46 | -0.01 | -1.54   | 2.E-43 |
| Q7L4M3 | GQRASLEAAIADAEQRGELAIK                                                              | 2296.20 | 2296.21 | -0.01 | -2.29   | 2.E-43 |
| P22626 | RGFGFVTFDDHDPVDKIVLQK                                                               | 2431.15 | 2432.25 | -1.10 | -453.28 | 2.E-43 |
| Q96QV6 | LLGGVTIAQGGVLPNIQAVLLPK                                                             | 2270.36 | 2270.37 | -0.01 | -4.42   | 2.E-43 |
| Q96QV6 | LLGGVTIAQGGVLPNIQAVLLPK                                                             | 2270.43 | 2270.37 | 0.06  | 27.30   | 2.E-43 |
| P22626 | RGFGFVTFDDHDPVDKIVLQK                                                               | 2432.25 | 2432.25 | 0.00  | -1.60   | 2.E-43 |
| P02533 | TEELNREVATNSELVQSGK                                                                 | 2103.04 | 2103.04 | 0.00  | -1.51   | 3.E-43 |
| P22626 | RSRGFGFVTFSSMAEVDAAAMAARPHSIDGRVVEPK                                                | 3777.88 | 3777.88 | 0.00  | -0.93   | 3.E-43 |
| A5PLR1 | STELLIRKLPFQRLVREIAQDFKTDLRFQSSAVMALQEACEAY<br>LVGLFEDTNLCAIHAKRVTIMPKDIQLARRIRGERA | 9098.86 | 9098.88 | -0.02 | -2.14   | 3.E-43 |
| P0C0S8 | VTIAQGGVLPNIQAVLLPK                                                                 | 1930.09 | 1930.16 | -0.07 | -36.10  | 3.E-43 |
| P0C0S8 | VTIAQGGVLPNIQAVLLPK                                                                 | 1930.12 | 1930.16 | -0.04 | -23.10  | 3.E-43 |
| P0C0S8 | VTIAQGGVLPNIQAVLLPK                                                                 | 1930.15 | 1930.16 | -0.01 | -3.57   | 3.E-43 |
| P0C0S8 | VTIAQGGVLPNIQAVLLPK                                                                 | 1930.20 | 1930.16 | 0.04  | 21.97   | 3.E-43 |
| A5PLR1 | STELLIRKLPFQRLVREIAQDFKTDLRFQSSAVMALQEACEAY<br>LVGLFEDTNLCAIHAKRVTIMPKDIQLARRIRGERA | 9098.89 | 9098.88 | 0.01  | 1.25    | 4.E-43 |
| A2BDF6 | STELLIRKLPFQRLVREIAQDFKTDLRFQSSAVMALQEASEAYL<br>VGLFEDTNLCAIHAKRVTIMPKDIQLARRIRGERA | 9082.93 | 9082.91 | 0.02  | 2.51    | 6.E-43 |

|        |                                                                                     |         |         |       |        |        |
|--------|-------------------------------------------------------------------------------------|---------|---------|-------|--------|--------|
| A5PLR1 | STELLIRKLPFQRLVREIAQDFKTDLRFQSSAVMALQEACEAY<br>LVGLFEDTNLCAIHAKRVTIMPKDIQLARRIRGERA | 9098.92 | 9098.88 | 0.04  | 4.22   | 6.E-43 |
| P51991 | IFVGGIKEDTEEYNLRDYFEK                                                               | 2564.24 | 2564.24 | 0.00  | -0.79  | 8.E-43 |
| P22626 | SGNFGGSRNMGGPYGGGNYGPGGSGGSGGYGGRSRY                                                | 3357.38 | 3357.44 | -0.06 | -17.66 | 8.E-43 |
| P22626 | SGNFGGSRNMGGPYGGGNYGPGGSGGSGGYGGRSRY                                                | 3357.44 | 3357.44 | 0.00  | 0.78   | 8.E-43 |
| P04908 | LLGRVTIAQGGVLPNIQAVLLPK                                                             | 2369.44 | 2369.45 | -0.01 | -2.40  | 1.E-42 |
| P60709 | IWHHTFYNELRVAPEEHPVLLTEAPLNPK                                                       | 3449.78 | 3449.79 | -0.01 | -2.40  | 1.E-42 |
| A5PLR1 | STELLIRKLPFQRLVREIAQDFKTDLRFQSSAVMALQEACEAY<br>LVGLFEDTNLCAIHAKRVTIMPKDIQLARRIRGERA | 9098.88 | 9098.88 | 0.00  | -0.08  | 1.E-42 |
| P22626 | SGNFGGSRNMGGPYGGGNYGPGGSGGSGGYGGRSRY                                                | 3357.43 | 3357.44 | -0.01 | -3.48  | 2.E-42 |
| P22626 | LFIGGLSFETTEESLRNYEQWGK                                                             | 2866.37 | 2866.38 | -0.01 | -3.01  | 2.E-42 |
| P60709 | YPIE(317)HGIVTNWDDMEK                                                               | 1959.90 | 1959.90 | 0.00  | -1.83  | 2.E-42 |
| A5PLR1 | STELLIRKLPFQRLVREIAQDFKTDLRFQSSAVMALQEACEAY<br>LVGLFEDTNLCAIHAKRVTIMPKDIQLARRIRGERA | 9098.80 | 9098.88 | -0.08 | -8.61  | 3.E-42 |
| Q14978 | (41)ADAGIRRVVPSDLYPLVLGFLRDNQLSEVANK                                                | 3566.91 | 3566.92 | -0.01 | -2.01  | 3.E-42 |
| P62316 | MFLRGDSVIVVLRNPLIAGK                                                                | 2197.28 | 2197.28 | 0.00  | -2.21  | 4.E-42 |
| Q7L4M3 | GQRASLEAAIADAEQRGELAIAIK                                                            | 2296.21 | 2296.21 | 0.00  | -0.81  | 4.E-42 |
| P06748 | MSVQPTVSLGGFEITPPVLRLLK                                                             | 2467.33 | 2467.39 | -0.07 | -26.35 | 5.E-42 |

|        |                                      |         |         |       |          |        |
|--------|--------------------------------------|---------|---------|-------|----------|--------|
| P06748 | MSVQPTVSLGGFEITPPVVLRLK              | 2467.38 | 2467.39 | -0.01 | -3.49    | 5.E-42 |
| P09651 | RGFAFVTFDHDSVDK                      | 1854.82 | 1854.85 | -0.03 | -13.77   | 7.E-42 |
| P09651 | RGFAFVTFDHDSVDK                      | 1854.85 | 1854.85 | 0.00  | -0.13    | 7.E-42 |
| P33778 | AMGIMNSFVNDIFERIAGEASRLAHYNK         | 3149.55 | 3153.55 | -4.00 | -1269.41 | 7.E-42 |
| P33778 | AMGIMNSFVNDIFERIAGEASRLAHYNK         | 3150.88 | 3153.55 | -2.67 | -846.67  | 7.E-42 |
| P63244 | DVLSVAFSSDNRQIVSGSRDK                | 2279.15 | 2279.15 | 0.00  | -0.51    | 1.E-41 |
| P33778 | AMGIMNSFVNDIFERIAGEASRLAHYNK         | 3152.21 | 3153.55 | -1.34 | -424.29  | 1.E-41 |
| P08758 | (41)AQVLRGTVDFPGFDERADAETLRK         | 2833.44 | 2833.44 | 0.00  | -1.25    | 1.E-41 |
| Q14978 | (41)ADAGIRRVVPSDLYPLVLGFLRDNQLSEVANK | 3566.91 | 3566.92 | -0.01 | -1.96    | 1.E-41 |
| Q09028 | NTPFLYDLVMTHALEWPSLTAQWLPDVTRPEGK    | 3824.91 | 3824.92 | -0.01 | -3.07    | 2.E-41 |
| P33778 | AMGIMNSFVNDIFERIAGEASRLAHYNK         | 3153.48 | 3153.55 | -0.07 | -23.33   | 2.E-41 |
| P33778 | AMGIMNSFVNDIFERIAGEASRLAHYNK         | 3153.54 | 3153.55 | -0.01 | -1.67    | 2.E-41 |
| P33778 | AMGIMNSFVNDIFERIAGEASRLAHYNK         | 3154.88 | 3153.55 | 1.33  | 421.26   | 2.E-41 |
| P33778 | AMGIMNSFVNDIFERIAGEASRLAHYNK         | 3156.21 | 3153.55 | 2.66  | 844.03   | 2.E-41 |
| P04083 | ALTGHLEEVVLLALK                      | 1604.95 | 1604.95 | 0.00  | -1.62    | 2.E-41 |



|        |                                                                                     |         |         |       |        |        |
|--------|-------------------------------------------------------------------------------------|---------|---------|-------|--------|--------|
| P43243 | NLRYQLLQLVEPFGVISNHLILNK                                                            | 2820.59 | 2820.60 | -0.01 | -2.47  | 2.E-41 |
| P0C0S8 | VTIAQGGVLPNIQAVLLPK                                                                 | 1930.13 | 1930.16 | -0.03 | -13.57 | 3.E-41 |
| P0C0S8 | VTIAQGGVLPNIQAVLLPK                                                                 | 1930.16 | 1930.16 | 0.00  | -0.67  | 3.E-41 |
| P60709 | YPIE(317)HGIVTNWDDMEK                                                               | 1959.86 | 1959.90 | -0.04 | -20.56 | 3.E-41 |
| P60709 | YPIE(317)HGIVTNWDDMEK                                                               | 1959.89 | 1959.90 | -0.01 | -2.90  | 3.E-41 |
| P09651 | GGNFGGRSSGPYGGGGQYFAK                                                               | 2019.92 | 2019.92 | 0.00  | -1.28  | 3.E-41 |
| P0C0S8 | GNYAERVGAGAPVYLAHVLEYLTAIELELAGNAARDNK                                              | 3962.07 | 3962.05 | 0.02  | 4.29   | 3.E-41 |
| P60709 | YPIE(317)HGIVTNWDDMEK                                                               | 1959.90 | 1959.90 | -0.01 | -2.54  | 4.E-41 |
| P20700 | SLEGDLEDLKDQIAQLEASLAAAKK                                                           | 2655.40 | 2655.40 | 0.00  | -1.78  | 4.E-41 |
| A5PLR1 | STELLIRKLPFQRLVREIAQDFKTDLRFQSSAVMALQEACEAY<br>LVGLFEDTNLCAIHAKRVTIMPKDIQLARRIRGERA | 9098.64 | 9098.88 | -0.24 | -26.59 | 5.E-41 |
| A5PLR1 | STELLIRKLPFQRLVREIAQDFKTDLRFQSSAVMALQEACEAY<br>LVGLFEDTNLCAIHAKRVTIMPKDIQLARRIRGERA | 9098.86 | 9098.88 | -0.02 | -1.81  | 6.E-41 |
| P31949 | TEFLSFMNTELAFTK                                                                     | 1848.90 | 1848.90 | 0.00  | -2.42  | 6.E-41 |
| Q6FI13 | GNYAERVGAGAPVYMAHVLEYLTAIELELAGNAARDNKK                                             | 4108.00 | 4108.11 | -0.11 | -27.53 | 7.E-41 |
| P63220 | (49)MQNDAGEFVDLYVPRK                                                                | 1922.92 | 1922.92 | 0.00  | 0.80   | 8.E-41 |
| P33778 | RSTITSREIQTAVRLLLPGELAK                                                             | 2551.44 | 2551.48 | -0.04 | -13.88 | 9.E-41 |

|        |                                                                                     |         |         |       |         |        |
|--------|-------------------------------------------------------------------------------------|---------|---------|-------|---------|--------|
| P33778 | RSTITSREIQTAVRLLLPGELAK                                                             | 2551.48 | 2551.48 | 0.00  | -0.95   | 9.E-41 |
| Q71UI9 | RITPRHLQLAIRGDEELDSLIIK                                                             | 2572.41 | 2572.44 | -0.03 | -13.09  | 1.E-40 |
| Q71UI9 | RITPRHLQLAIRGDEELDSLIIK                                                             | 2572.44 | 2572.44 | 0.00  | -0.80   | 1.E-40 |
| P51991 | IFVGGIKEDTEEYNLRDYFEK                                                               | 2564.24 | 2564.24 | 0.00  | -1.85   | 1.E-40 |
| Q6FI13 | GNYAERVGAGAPVYMAAVLEYLTAEILELAGNAARDNKK                                             | 4108.08 | 4108.11 | -0.03 | -6.76   | 1.E-40 |
| A5PLR1 | STELLIRKLPFQRLVREIAQDFKTDLRFQSSAVMALQEACEAY<br>LVGLFEDTNLCAIHAKRVTIMPKDIQLARRIRGERA | 9098.90 | 9098.88 | 0.02  | 2.33    | 1.E-40 |
| P0C0S8 | VTIAQGGVLPNIQAVLLPKK                                                                | 2058.26 | 2058.26 | 0.00  | -1.33   | 1.E-40 |
| A5PLR1 | STELLIRKLPFQRLVREIAQDFKTDLRFQSSAVMALQEACEAY<br>LVGLFEDTNLCAIHAKRVTIMPKDIQLARRIRGERA | 9098.88 | 9098.88 | 0.00  | 0.48    | 1.E-40 |
| A2BDF6 | STELLIRKLPFQRLVREIAQDFKTDLRFQSSAVMALQEASEAYL<br>VGLFEDTNLCAIHAKRVTIMPKDIQLARRIRGERA | 9082.93 | 9082.91 | 0.02  | 1.66    | 2.E-40 |
| P0C0S8 | VTIAQGGVLPNIQAVLLPK                                                                 | 1929.49 | 1930.16 | -0.67 | -346.25 | 2.E-40 |
| P09651 | RGFAFVTFDHDSVDKIVIQK                                                                | 2436.24 | 2436.24 | 0.00  | -1.15   | 3.E-40 |
| P0C0S8 | VTIAQGGVLPNIQAVLLPK                                                                 | 1930.16 | 1930.16 | 0.00  | -0.35   | 3.E-40 |
| P0C0S8 | VTIAQGGVLPNIQAVLLPK                                                                 | 1928.82 | 1930.16 | -1.34 | -692.49 | 3.E-40 |
| A5PLR1 | STELLIRKLPFQRLVREIAQDFKTDLRFQSSAVMALQEACEAY<br>LVGLFEDTNLCAIHAKRVTIMPKDIQLARRIRGERA | 9098.86 | 9098.88 | -0.02 | -1.90   | 8.E-40 |
| P22087 | VLYLGAASGTTVSHVSDIVGPDGLVYAVEFSHRSGRD LINLAK                                        | 4483.34 | 4483.35 | -0.01 | -2.31   | 9.E-40 |

|        |                                                                                     |         |         |       |          |        |
|--------|-------------------------------------------------------------------------------------|---------|---------|-------|----------|--------|
| Q15427 | VSEPLLWELFLQAGPVVNTHMPK                                                             | 2604.38 | 2604.38 | 0.00  | -1.68    | 2.E-39 |
| P17096 | KLEKEEEEGISQESSEEEQ                                                                 | 2231.07 | 2235.99 | -4.92 | -2205.01 | 2.E-39 |
| P17096 | KLEKEEEEGISQESSEEEQ                                                                 | 2235.98 | 2235.99 | -0.01 | -2.34    | 2.E-39 |
| P06748 | MSVQPTVSLGGFEITPPVLRK                                                               | 2467.33 | 2467.39 | -0.06 | -23.91   | 3.E-39 |
| P06748 | MSVQPTVSLGGFEITPPVLRK                                                               | 2467.38 | 2467.39 | -0.01 | -5.31    | 3.E-39 |
| A5PLR1 | STELLIRKLPFQRLVREIAQDFKTDLRFQSSAVMALQEACEAY<br>LVGLFEDTNLCAIHAKRVTIMPKDIQLARRIRGERA | 9098.87 | 9098.88 | -0.01 | -1.31    | 3.E-39 |
| Q3BDU5 | LDNARQSAERNSNLVGAHEELQQSRIRIDSLSAQLSQLQK                                            | 4573.28 | 4573.37 | -0.09 | -19.50   | 4.E-39 |
| Q3BDU5 | LDNARQSAERNSNLVGAHEELQQSRIRIDSLSAQLSQLQK                                            | 4573.36 | 4573.37 | -0.01 | -1.28    | 4.E-39 |
| P07355 | GRRRAEDGSVIDYELIDQDARDLYDAGVK                                                       | 3138.51 | 3138.52 | -0.01 | -1.85    | 5.E-39 |
| P07355 | GRRRAEDGSVIDYELIDQDARDLYDAGVK                                                       | 3139.46 | 3138.52 | 0.94  | 297.88   | 5.E-39 |
| P09651 | PRNQGGYGGSSSSSSSYGSGRRF                                                             | 2249.98 | 2250.02 | -0.04 | -16.09   | 5.E-39 |
| P09651 | PRNQGGYGGSSSSSSSYGSGRRF                                                             | 2250.02 | 2250.02 | 0.00  | -1.96    | 5.E-39 |
| P60709 | YPIE(317)HGIVTNWDDMEK                                                               | 1959.89 | 1959.90 | -0.01 | -2.70    | 6.E-39 |
| A5PLR1 | STELLIRKLPFQRLVREIAQDFKTDLRFQSSAVMALQEACEAY<br>LVGLFEDTNLCAIHAKRVTIMPKDIQLARRIRGERA | 9098.90 | 9098.88 | 0.02  | 1.68     | 7.E-39 |
| Q9NWH9 | (41)AAATGAVAASAASGQAEKG                                                             | 1629.77 | 1629.80 | -0.03 | -16.76   | 8.E-39 |

|        |                                                |         |         |       |         |        |
|--------|------------------------------------------------|---------|---------|-------|---------|--------|
| Q9NWH9 | (41)AAATGAVAASAASGQAEKG                        | 1629.80 | 1629.80 | 0.00  | -1.85   | 8.E-39 |
| P07355 | SLYYYIQQDTKGDYQK                               | 2011.95 | 2011.95 | 0.00  | -2.00   | 8.E-39 |
| P07355 | SLYYYIQQDTKGDYQK                               | 2015.98 | 2011.95 | 4.03  | 1996.64 | 8.E-39 |
| Q96QV6 | LLGGVTIAQGGVLPNIQAVLLPK                        | 2270.36 | 2270.37 | -0.01 | -3.93   | 1.E-38 |
| Q96QV6 | LLGGVTIAQGGVLPNIQAVLLPK                        | 2271.32 | 2270.37 | 0.95  | 417.10  | 1.E-38 |
| P08758 | (41)AQVLRGTVTDFPGFDERADAETLRK                  | 2833.44 | 2833.44 | 0.00  | -1.18   | 1.E-38 |
| P09651 | RGFAFVTFDDHDSVDK                               | 1854.85 | 1854.85 | 0.00  | -1.15   | 1.E-38 |
| P22626 | RGFGFVTFDDHDPVDK                               | 1854.85 | 1850.86 | 3.99  | 2152.67 | 2.E-38 |
| P06748 | LAADEDDEEDDEEDDEEDDFDDEEAEEKAPVKKSIRD<br>TPAK  | 5114.03 | 5114.02 | 0.01  | 2.42    | 2.E-38 |
| P09651 | GGNFGGRSSGPYGGGGQYFAKPRNQGGYGGSSSSSYGS<br>GRRF | 4251.92 | 4251.92 | 0.00  | -1.04   | 2.E-38 |
| Q14978 | (41)ADAGIRRVVPSDLYPLVLGFLRDNLSEVANK            | 3566.83 | 3566.92 | -0.09 | -24.44  | 2.E-38 |
| Q14978 | (41)ADAGIRRVVPSDLYPLVLGFLRDNLSEVANK            | 3566.90 | 3566.92 | -0.02 | -4.28   | 2.E-38 |
| P62736 | AGFAGDDAPRAVFPSIVGRPRHQGVMVMGQK                | 3307.62 | 3307.68 | -0.06 | -18.72  | 2.E-38 |
| P62736 | AGFAGDDAPRAVFPSIVGRPRHQGVMVMGQK                | 3307.68 | 3307.68 | 0.00  | -0.46   | 2.E-38 |
| P09651 | GGNFGGRSSGPYGGGGQYFAK                          | 2019.89 | 2019.92 | -0.03 | -13.36  | 2.E-38 |

|        |                                      |         |         |       |         |        |
|--------|--------------------------------------|---------|---------|-------|---------|--------|
| P09651 | GGNFGGRSSGPYGGGGQYFAK                | 2019.92 | 2019.92 | 0.00  | -0.99   | 2.E-38 |
| P26599 | LPIDVTEGEVISLGLPFGK                  | 1983.09 | 1983.09 | 0.00  | -2.21   | 2.E-38 |
| P0C0S8 | VTIAQGGVLPNIQAVLLPK                  | 1930.09 | 1930.16 | -0.07 | -36.10  | 2.E-38 |
| P0C0S8 | VTIAQGGVLPNIQAVLLPK                  | 1930.12 | 1930.16 | -0.04 | -23.10  | 2.E-38 |
| P0C0S8 | VTIAQGGVLPNIQAVLLPK                  | 1930.15 | 1930.16 | -0.01 | -3.57   | 2.E-38 |
| P0C0S8 | VTIAQGGVLPNIQAVLLPK                  | 1930.20 | 1930.16 | 0.04  | 21.97   | 2.E-38 |
| P06748 | NCFRMTDQEIQLWQWRK                    | 2467.15 | 2467.15 | 0.00  | -0.61   | 3.E-38 |
| P22626 | SGNFGGSRNMGGPYGGGNYGPGGSGGSGGYGGRSRY | 3356.36 | 3357.44 | -1.08 | -322.13 | 3.E-38 |
| P22626 | RGFGFVTFDDHDPVDK                     | 1850.84 | 1850.86 | -0.02 | -12.65  | 4.E-38 |
| P22626 | RGFGFVTFDDHDPVDK                     | 1850.86 | 1850.86 | 0.00  | -0.98   | 4.E-38 |
| P06748 | NCFRMTDQEIQLWQWRK                    | 2467.11 | 2467.15 | -0.04 | -16.13  | 5.E-38 |
| P22626 | SGNFGGSRNMGGPYGGGNYGPGGSGGSGGYGGRSRY | 3357.43 | 3357.44 | -0.01 | -2.59   | 5.E-38 |
| P62805 | VFLENVIRDAVITYTEHAK                  | 2104.10 | 2104.10 | 0.00  | -1.98   | 5.E-38 |
| P22626 | SGNFGGSRNMGGPYGGGNYGPGGSGGSGGYGGRSRY | 3357.44 | 3357.44 | 0.00  | 1.07    | 6.E-38 |
| P62805 | VFLENVIRDAVITYTEHAK                  | 2104.05 | 2104.10 | -0.05 | -23.03  | 7.E-38 |

|        |                                      |         |         |       |          |        |
|--------|--------------------------------------|---------|---------|-------|----------|--------|
| P0C0S5 | SRTTSHGRVGATAAVYSAAILYLTAEVLELAGNASK | 3776.96 | 3776.97 | -0.01 | -3.19    | 8.E-38 |
| P39023 | LDWARERLEQQVPVNQVFGQDEMIDVIGVTK      | 3611.83 | 3611.84 | -0.01 | -3.14    | 1.E-37 |
| Q99880 | AMGIMNSFVNDIFERIASEASRLAHYNK         | 3179.56 | 3183.56 | -4.00 | -1258.77 | 1.E-37 |
| P33778 | AMGIMNSFVNDIFERIEASRLAHYNK           | 3153.55 | 3153.55 | 0.00  | -1.00    | 1.E-37 |
| P05387 | MRYVASYLLAALGGNSSPSAK                | 2155.11 | 2155.11 | 0.00  | -2.11    | 1.E-37 |
| P05386 | KVEAKKEESEESDDDMGFGLFD               | 2504.10 | 2504.09 | 0.01  | 2.11     | 1.E-37 |
| P46777 | HIMGQNVADYMRYLMEEDEDAYKK             | 2951.31 | 2948.31 | 3.00  | 1016.74  | 1.E-37 |
| Q99880 | AMGIMNSFVNDIFERIASEASRLAHYNK         | 3183.49 | 3183.56 | -0.07 | -22.78   | 1.E-37 |
| P07355 | AYTNFDAERDALNIETAIK                  | 2151.05 | 2154.06 | -3.01 | -1397.44 | 2.E-37 |
| P07355 | AYTNFDAERDALNIETAIK                  | 2154.01 | 2154.06 | -0.05 | -23.71   | 2.E-37 |
| P07355 | AYTNFDAERDALNIETAIK                  | 2154.05 | 2154.06 | -0.01 | -2.73    | 2.E-37 |
| Q99880 | AMGIMNSFVNDIFERIASEASRLAHYNK         | 3183.55 | 3183.56 | -0.01 | -2.34    | 2.E-37 |
| P22626 | SGNFGGSRNMGGPYGGGNYGPGGSGGSGGYGGRSRY | 3357.43 | 3357.44 | -0.01 | -3.45    | 2.E-37 |
| P60709 | YPIE(317)HGIVTNWDDMEK                | 1959.87 | 1959.90 | -0.03 | -14.48   | 2.E-37 |
| P60709 | YPIE(317)HGIVTNWDDMEK                | 1959.90 | 1959.90 | 0.00  | -1.42    | 2.E-37 |

|        |                                                                                     |         |         |       |          |        |
|--------|-------------------------------------------------------------------------------------|---------|---------|-------|----------|--------|
| P09651 | GGNFGGRSSGPYGGGGQYFAK                                                               | 2019.92 | 2019.92 | 0.00  | -1.88    | 3.E-37 |
| P06748 | MSVQPTVSLGGFEITPPVVLRLK                                                             | 2467.38 | 2467.39 | -0.01 | -3.85    | 3.E-37 |
| P22626 | LFIGGLSFETTEESLRNYEQWVK                                                             | 2866.38 | 2866.38 | 0.00  | -0.61    | 4.E-37 |
| Q8NC51 | DRAKVEFNIRKPNEGADGQWKK                                                              | 2588.28 | 2585.35 | 2.93  | 1133.45  | 4.E-37 |
| Q08211 | DAQSNAARDFVNYLVRINEIK                                                               | 2436.22 | 2435.26 | 0.96  | 394.59   | 4.E-37 |
| P22626 | LFVGGIKEDTEEHHLRDYFEEYVK                                                            | 2910.38 | 2910.38 | 0.00  | -0.06    | 5.E-37 |
| P0C0S8 | VTIAQGGVLPNIQAVLLPK                                                                 | 1930.21 | 1930.16 | 0.05  | 23.58    | 5.E-37 |
| A5PLR1 | STELLIRKLPFQRLVREIAQDFKTDLRFQSSAVMALQEACEAY<br>LVGLFEDTNLCAIHAKRVTIMPKDIQLARRIRGERA | 9098.87 | 9098.88 | -0.01 | -1.11    | 5.E-37 |
| P07355 | AYTNFDAERDALNIETAIK                                                                 | 2151.05 | 2154.06 | -3.01 | -1398.56 | 6.E-37 |
| P09651 | RGFAFVTFDHDSVDKIVIQK                                                                | 2436.24 | 2436.24 | 0.00  | -1.81    | 6.E-37 |
| P0C0S8 | GNYAERVGAGAPVYLAAVLEYLTAEILELAGNAARDNKK                                             | 4090.15 | 4090.15 | 0.00  | -1.06    | 7.E-37 |
| Q08211 | DAQSNAARDFVNYLVRINEIK                                                               | 2435.25 | 2435.26 | -0.01 | -2.17    | 7.E-37 |
| P60709 | YPIE(317)HGIVTNWDDMEK                                                               | 1959.89 | 1959.90 | -0.01 | -2.90    | 8.E-37 |
| Q8NC51 | DRAKVEFNIRKPNEGADGQWKK                                                              | 2585.31 | 2585.35 | -0.04 | -16.21   | 8.E-37 |
| Q8NC51 | DRAKVEFNIRKPNEGADGQWKK                                                              | 2585.35 | 2585.35 | 0.00  | 1.08     | 8.E-37 |

|        |                                                                                                                                            |          |          |       |         |        |
|--------|--------------------------------------------------------------------------------------------------------------------------------------------|----------|----------|-------|---------|--------|
| P22626 | RGFGFVTFDDHDPVDK                                                                                                                           | 1854.85  | 1850.86  | 3.99  | 2153.59 | 8.E-37 |
| P0C0S8 | VTIAQGGVLPNIQAVLLPK                                                                                                                        | 1930.15  | 1930.16  | -0.01 | -3.72   | 8.E-37 |
| P07355 | AYTNFDAERDALNIETAIK                                                                                                                        | 2154.05  | 2154.06  | -0.01 | -2.96   | 8.E-37 |
| P05787 | AQYEDIANRSRAEAESMYQIK                                                                                                                      | 2472.17  | 2472.17  | 0.00  | 0.40    | 8.E-37 |
| Q8NC51 | PGHLQEGFGCVVTNRFDQLFDDSDPFEVLK                                                                                                             | 3537.65  | 3537.65  | 0.00  | -0.88   | 9.E-37 |
| Q9Y2X3 | FQDTAEALAAFTALMEGK                                                                                                                         | 1912.92  | 1912.92  | 0.00  | -1.42   | 1.E-36 |
| P09651 | PRNQGGYGGSSSSSYGSGRRF                                                                                                                      | 2250.02  | 2250.02  | 0.00  | -1.74   | 1.E-36 |
| P33778 | RSTITSREIQTAVRLLLPGELAK                                                                                                                    | 2551.45  | 2551.48  | -0.03 | -12.87  | 1.E-36 |
| P33778 | RSTITSREIQTAVRLLLPGELAK                                                                                                                    | 2551.48  | 2551.48  | 0.00  | -0.01   | 1.E-36 |
| P62241 | TRIIDVVYNASNELVRTK                                                                                                                         | 2204.15  | 2204.19  | -0.04 | -16.83  | 1.E-36 |
| P62241 | TRIIDVVYNASNELVRTK                                                                                                                         | 2204.19  | 2204.19  | 0.00  | -1.86   | 1.E-36 |
| Q13727 | FSMPGFKGEGPDVDVNLPKADLDVSGPKVIDIDVPDVNIEGP<br>DAK                                                                                          | 4592.27  | 4592.26  | 0.01  | 1.59    | 2.E-36 |
| Q86U42 | (41)AAAAAAAAAAGAAGGRGSGPGRRRHLVPGAGGEAGEG<br>APGGAGDYNGLESEEELEPEELLEPEPEPEPEEEEEPPRRA<br>PPGAPGPGPGSGAPGSQEEEEEPGLVEGDPGDGAIEDPELE<br>AIK | 11816.57 | 11816.60 | -0.03 | -2.69   | 2.E-36 |
| P22626 | RGFGFVTFDDHDPVDK                                                                                                                           | 1850.86  | 1850.86  | 0.00  | -0.17   | 2.E-36 |
| Q3BDU5 | LDNARQSAERNNSNLVGAHEELQQSRIRIDSLSAQLSQLQK                                                                                                  | 4573.35  | 4573.37  | -0.02 | -4.02   | 2.E-36 |



|        |                                             |         |         |       |         |        |
|--------|---------------------------------------------|---------|---------|-------|---------|--------|
| P22087 | VLYLGAASGTTVSHVSDIVGPDGLVYAVEFSHRSGRDLINLAK | 4483.34 | 4483.35 | -0.01 | -1.38   | 2.E-36 |
| P02545 | AGQVVTIWAAGAGATHSPPTDLVWK                   | 2532.31 | 2532.31 | 0.00  | -1.91   | 2.E-36 |
| P51991 | IFVGGIKEDTEEYNLRDYFEK                       | 2565.24 | 2564.24 | 1.00  | 390.40  | 2.E-36 |
| P09651 | PRNQGGYGGSSSSSSSYGSGRRF                     | 2250.01 | 2250.02 | -0.01 | -2.80   | 2.E-36 |
| P16401 | (51)SETAPAETATPAPVEK                        | 1639.79 | 1639.79 | 0.00  | -1.83   | 3.E-36 |
| P06748 | VKLAADEDDEDDDEEDDEDDDDDFDDEEAEEKAPVK        | 4344.62 | 4344.61 | 0.01  | 2.17    | 3.E-36 |
| P60709 | IWHHTFYNELRVAPEEHPVLLTEAPLNPK               | 3449.78 | 3449.79 | -0.01 | -2.57   | 3.E-36 |
| O43390 | VLFVRNLATTVTEEILEK                          | 2074.16 | 2074.17 | -0.01 | -2.97   | 3.E-36 |
| P04908 | LLGRVTIAQGGVLPNIQAVLLPK                     | 2369.44 | 2369.45 | -0.01 | -2.90   | 3.E-36 |
| P60709 | YPIE(317)HGIVTNWDDMEK                       | 1959.89 | 1959.90 | -0.01 | -2.90   | 3.E-36 |
| P04908 | LLGRVTIAQGGVLPNIQAVLLPK                     | 2369.45 | 2369.45 | 0.00  | -1.34   | 4.E-36 |
| P04908 | LLGRVTIAQGGVLPNIQAVLLPK                     | 2369.38 | 2369.45 | -0.07 | -28.98  | 4.E-36 |
| P22626 | EDTEEHHLRDYFEEYKIDTIEIITDRQSGK              | 3771.92 | 3765.78 | 6.14  | 1628.25 | 5.E-36 |
| P04908 | LLGRVTIAQGGVLPNIQAVLLPK                     | 2369.41 | 2369.45 | -0.04 | -17.34  | 5.E-36 |
| P33778 | AMGIMNSFVNDIFERIAGEASRLAHYNK                | 3153.19 | 3153.55 | -0.36 | -113.21 | 5.E-36 |

|        |                                                                                     |         |         |       |          |        |
|--------|-------------------------------------------------------------------------------------|---------|---------|-------|----------|--------|
| P33778 | AMGIMNSFVNDIFERIAGEASRLAHYNK                                                        | 3153.54 | 3153.55 | -0.01 | -4.62    | 5.E-36 |
| P07355 | SALSGHLETVILGLLK                                                                    | 1649.94 | 1649.97 | -0.03 | -17.07   | 5.E-36 |
| P07355 | SALSGHLETVILGLLK                                                                    | 1649.97 | 1649.97 | 0.00  | -2.04    | 5.E-36 |
| P61978 | IDEPLEGSEDRIITITGTQDQIQNAQYLLQNSVK                                                  | 3828.93 | 3828.94 | -0.01 | -3.19    | 5.E-36 |
| P60709 | YPIE(317)HGIVTNWDDMEK                                                               | 1959.90 | 1959.90 | 0.00  | -1.73    | 6.E-36 |
| A2BDF6 | STELLIRKLPFQRLVREIAQDFKTDLRFQSSAVMALQEASEAYL<br>VGLFEDTNLCAIHAKRVTIMPKDIQLARRIRGERA | 9082.91 | 9082.91 | 0.00  | -0.05    | 9.E-36 |
| P07355 | GRRRAEDGSVIDYELIDQDARDLYDAGVK                                                       | 3138.51 | 3138.52 | -0.01 | -2.55    | 9.E-36 |
| P46776 | TGAAPIIDVVRSGYYK                                                                    | 1708.88 | 1708.91 | -0.03 | -17.55   | 9.E-36 |
| P46776 | TGAAPIIDVVRSGYYK                                                                    | 1708.91 | 1708.91 | 0.00  | -1.63    | 9.E-36 |
| P05787 | TEISEMNRNISRQLQAEIEGLK                                                              | 2427.10 | 2430.25 | -3.15 | -1297.12 | 1.E-35 |
| P02533 | TEELNREVATNSELVQSGK                                                                 | 2103.03 | 2103.04 | -0.01 | -2.84    | 1.E-35 |
| P16401 | (51)SETAPAETATPAPVEK                                                                | 1639.79 | 1639.79 | 0.00  | -0.97    | 1.E-35 |
| P05787 | TEISEMNRNISRQLQAEIEGLK                                                              | 2430.24 | 2430.25 | -0.01 | -2.82    | 1.E-35 |
| P05387 | LASVPAGGAVAVSAAPGSAAPAAGSAPAAAEEKKDEKKEE(37<br>)SEE(37)SDDDMGFGLFD                  | 5364.34 | 5364.36 | -0.02 | -4.18    | 1.E-35 |
| P07355 | AYTNFDAERDALNIETAIK                                                                 | 2151.06 | 2154.06 | -3.00 | -1395.77 | 2.E-35 |

|        |                                                 |         |         |       |          |        |
|--------|-------------------------------------------------|---------|---------|-------|----------|--------|
| P07355 | AYTNFDAERDALNIETAIK                             | 2154.06 | 2154.06 | 0.00  | -1.71    | 2.E-35 |
| O75533 | KLSSWDQAETPGHTPSLRWDETPGRAK                     | 3049.50 | 3049.50 | 0.00  | 1.23     | 2.E-35 |
| P62854 | FVIRNIVEAAAVRDISEASVFDAYVLPK                    | 3091.66 | 3091.67 | -0.01 | -2.70    | 2.E-35 |
| P07355 | AYTNFDAERDALNIETAIK                             | 2154.01 | 2154.06 | -0.05 | -24.13   | 2.E-35 |
| P07355 | AYTNFDAERDALNIETAIK                             | 2154.05 | 2154.06 | -0.01 | -2.82    | 2.E-35 |
| P09651 | GGNFGGRSSGPYGGGGQYFAKPRNQGGYGGSSSSSSYGS<br>GRRF | 4251.92 | 4251.92 | 0.00  | -0.93    | 3.E-35 |
| P07355 | AYTNFDAERDALNIETAIK                             | 2151.02 | 2154.06 | -3.04 | -1415.32 | 3.E-35 |
| P07355 | AYTNFDAERDALNIETAIK                             | 2151.05 | 2154.06 | -3.01 | -1397.91 | 3.E-35 |
| P19338 | FGYVDFESAEDLEK                                  | 1647.73 | 1647.73 | 0.00  | -0.18    | 3.E-35 |
| Q71UI9 | RITPRHLQLAIRGDEELDSLIIK                         | 2572.43 | 2572.44 | -0.01 | -2.01    | 3.E-35 |
| P19338 | FGYVDFESAEDLEK                                  | 1646.82 | 1647.73 | -0.91 | -553.55  | 3.E-35 |
| P19338 | FGYVDFESAEDLEK                                  | 1647.73 | 1647.73 | 0.00  | -0.54    | 3.E-35 |
| Q12906 | EATDAIGHLDRQQREDITQSAQHALRLAAFGQLHK             | 3924.01 | 3924.01 | 0.00  | -1.10    | 4.E-35 |
| P25398 | (41)AEEGIAAGGVM DVNTALQEVLK                     | 2256.13 | 2256.13 | 0.00  | -1.48    | 4.E-35 |
| Q71UI9 | RITPRHLQLAIRGDEELDSLIIK                         | 2573.41 | 2572.44 | 0.97  | 375.62   | 4.E-35 |

|        |                                                                                     |         |         |       |          |        |
|--------|-------------------------------------------------------------------------------------|---------|---------|-------|----------|--------|
| P22626 | RGFGFVTFDDHDPVDK                                                                    | 1854.83 | 1850.86 | 3.97  | 2140.51  | 5.E-35 |
| P22626 | RGFGFVTFDDHDPVDK                                                                    | 1854.85 | 1850.86 | 3.99  | 2153.16  | 5.E-35 |
| P07355 | GRRRAEDGSVIDYELIDQDARDLYDAGVK                                                       | 3138.52 | 3138.52 | 0.00  | -0.87    | 5.E-35 |
| A5PLR1 | STELLIRKLPFQRLVREIAQDFKTDLRFQSSAVMALQEACEAY<br>LVGLFEDTNLCAIHAKRVTIMPKDIQLARRIRGERA | 9098.89 | 9098.88 | 0.01  | 0.90     | 6.E-35 |
| Q14839 | GSSGASVAAAAAAVAVVESMTATEVAPPPPPVEVPIRK                                              | 3753.99 | 3754.00 | -0.01 | -2.88    | 7.E-35 |
| P07355 | GRRRAEDGSVIDYELIDQDARDLYDAGVK                                                       | 3138.45 | 3138.52 | -0.07 | -23.14   | 7.E-35 |
| P33778 | AMGIMNSFVNDIFERIAGEASRLAHYNK                                                        | 3153.54 | 3153.55 | -0.01 | -4.11    | 9.E-35 |
| A2BDF6 | STELLIRKLPFQRLVREIAQDFKTDLRFQSSAVMALQEASEAYL<br>VGLFEDTNLCAIHAKRVTIMPKDIQLARRIRGERA | 9082.91 | 9082.91 | 0.00  | 0.04     | 9.E-35 |
| P19338 | VEGTEPTTAFNLVFNLNFNK                                                                | 2311.14 | 2311.15 | -0.01 | -2.43    | 1.E-34 |
| P33778 | AMGIMNSFVNDIFERIAGEASRLAHYNK                                                        | 3156.49 | 3153.55 | 2.94  | 931.27   | 1.E-34 |
| P33778 | RSTITSREIQTAVRLLLLPGELAK                                                            | 2551.44 | 2551.48 | -0.04 | -15.10   | 1.E-34 |
| P33778 | RSTITSREIQTAVRLLLLPGELAK                                                            | 2551.48 | 2551.48 | 0.00  | -1.07    | 1.E-34 |
| P60709 | YPIE(317)HGIVTNWDDMEK                                                               | 1959.90 | 1959.90 | 0.00  | -1.11    | 1.E-34 |
| P05787 | TEISEMNRNISRQLQAEIEGLK                                                              | 2427.10 | 2430.25 | -3.15 | -1296.01 | 1.E-34 |
| P05787 | TEISEMNRNISRQLQAEIEGLK                                                              | 2430.25 | 2430.25 | 0.00  | -1.34    | 1.E-34 |

|        |                                                                                     |         |         |       |          |        |
|--------|-------------------------------------------------------------------------------------|---------|---------|-------|----------|--------|
| Q8IU66 | TRIIPRHLQLAVRNDEELNK                                                                | 2414.35 | 2414.35 | 0.00  | -1.82    | 1.E-34 |
| P22626 | RGFGFVTFDDHDPVDK                                                                    | 1850.84 | 1850.86 | -0.02 | -12.27   | 2.E-34 |
| P22626 | RGFGFVTFDDHDPVDK                                                                    | 1850.86 | 1850.86 | 0.00  | -0.66    | 2.E-34 |
| A2BDF6 | STELLIRKLPFQRLVREIAQDFKTDLRFQSSAVMALQEASEAYL<br>VGLFEDTNLCAIHAKRVTIMPKDIQLARRIRGERA | 9082.99 | 9082.91 | 0.08  | 9.25     | 2.E-34 |
| A2BDF6 | STELLIRKLPFQRLVREIAQDFKTDLRFQSSAVMALQEASEAYL<br>VGLFEDTNLCAIHAKRVTIMPKDIQLARRIRGERA | 9083.69 | 9082.91 | 0.78  | 85.89    | 2.E-34 |
| P60709 | YPIE(317)HGIVTNWDDMEK                                                               | 1959.86 | 1959.90 | -0.04 | -19.53   | 2.E-34 |
| P0C0S8 | LLGKVITIAQGGVLPNIQAVLLPK                                                            | 2341.45 | 2341.45 | 0.00  | -0.22    | 2.E-34 |
| P07355 | SALSGHLETVILGLLK                                                                    | 1649.94 | 1649.97 | -0.03 | -17.80   | 2.E-34 |
| P07355 | SALSGHLETVILGLLK                                                                    | 1649.96 | 1649.97 | -0.01 | -3.07    | 2.E-34 |
| P06748 | MSVQPTVSLGGFEITPPVVLRLK                                                             | 2464.18 | 2467.39 | -3.21 | -1303.64 | 2.E-34 |
| P06748 | MSVQPTVSLGGFEITPPVVLRLK                                                             | 2467.38 | 2467.39 | -0.01 | -4.10    | 2.E-34 |
| A2BDF6 | STELLIRKLPFQRLVREIAQDFKTDLRFQSSAVMALQEASEAYL<br>VGLFEDTNLCAIHAKRVTIMPKDIQLARRIRGERA | 9082.91 | 9082.91 | 0.00  | -0.17    | 2.E-34 |
| P0C0S5 | SRTTSHGRVGATAAVYSAAILEYLTAEVLELAGNASK                                               | 3776.96 | 3776.97 | -0.01 | -3.16    | 2.E-34 |
| P07355 | SLYYYIQQDTKGDYQK                                                                    | 2011.95 | 2011.95 | 0.00  | -1.55    | 2.E-34 |
| P07355 | SLYYYIQQDTKGDYQK                                                                    | 2014.14 | 2011.95 | 2.19  | 1084.92  | 2.E-34 |

|        |                                                                                     |         |         |       |        |        |
|--------|-------------------------------------------------------------------------------------|---------|---------|-------|--------|--------|
| P06748 | MSVQPTVSLGGFEITPPVLRLLK                                                             | 2467.38 | 2467.39 | -0.01 | -3.16  | 3.E-34 |
| P06748 | MSVQPTVSLGGFEITPPVLRLLK                                                             | 2467.88 | 2467.39 | 0.49  | 199.77 | 3.E-34 |
| P26599 | LPIDVTEGEVISLGLPFGK                                                                 | 1983.10 | 1983.09 | 0.01  | 3.03   | 3.E-34 |
| O43390 | VLFVRNLATTVTTEEILEK                                                                 | 2074.17 | 2074.17 | 0.00  | -1.96  | 4.E-34 |
| P06748 | LAADEDDEDDDEEDDEDDDDDFDDEEAEEKAPVK                                                  | 4117.46 | 4117.45 | 0.01  | 2.43   | 4.E-34 |
| P06748 | LAADEDDEDDDEEDDEDDDDDFDDEEAEEKAPVK                                                  | 4117.35 | 4117.45 | -0.10 | -25.41 | 4.E-34 |
| P06748 | LAADEDDEDDDEEDDEDDDDDFDDEEAEEKAPVK                                                  | 4117.46 | 4117.45 | 0.01  | 2.65   | 4.E-34 |
| P09651 | IEVIEIMDRGSGK                                                                       | 1546.77 | 1546.80 | -0.03 | -16.53 | 4.E-34 |
| P09651 | IEVIEIMDRGSGK                                                                       | 1546.80 | 1546.80 | 0.00  | -1.27  | 4.E-34 |
| Q7L4M3 | GQRASLEAAIADAEQRGELAİK                                                              | 2296.21 | 2296.21 | 0.00  | -1.12  | 5.E-34 |
| A5PLR1 | STELLIRKLPFQRLVREIAQDFKTDLRFQSSAVMALQEACEAY<br>LVGLFEDTNLCAIHAKRVTIMPKDIQLARRIRGERA | 9098.87 | 9098.88 | -0.01 | -1.44  | 6.E-34 |
| P62736 | AGFAGDDAPRAVFPSIVGRPRHQGVMVGMGQK                                                    | 3307.68 | 3307.68 | 0.00  | -1.00  | 7.E-34 |
| P0C0S8 | TRIIPRHLQLAIRNDEELNK                                                                | 2428.42 | 2428.37 | 0.05  | 20.49  | 7.E-34 |
| P0C0S8 | TRIIPRHLQLAIRNDEELNK                                                                | 2428.43 | 2428.37 | 0.06  | 24.73  | 7.E-34 |
| P0C0S8 | TRIIPRHLQLAIRNDEELNK                                                                | 2429.31 | 2428.37 | 0.94  | 387.17 | 7.E-34 |

|        |                                                                                     |         |         |       |         |        |
|--------|-------------------------------------------------------------------------------------|---------|---------|-------|---------|--------|
| P08758 | VLTEIIASRTPEELRAIK                                                                  | 2038.15 | 2038.18 | -0.03 | -15.55  | 8.E-34 |
| P08758 | VLTEIIASRTPEELRAIK                                                                  | 2038.18 | 2038.18 | 0.00  | -1.42   | 8.E-34 |
| P0C0S8 | TRIIPRHLQLAIRNDEELNK                                                                | 2431.34 | 2428.37 | 2.97  | 1221.45 | 9.E-34 |
| P06748 | MSVQPTVSLGGFEITPPVVLRLK                                                             | 2467.38 | 2467.39 | -0.01 | -4.05   | 1.E-33 |
| P0C0S8 | TRIIPRHLQLAIRNDEELNK                                                                | 2428.36 | 2428.37 | -0.01 | -2.98   | 1.E-33 |
| P05204 | VKDEPQRRSARLSAKPAPPKPEPKPK                                                          | 2906.65 | 2906.66 | -0.01 | -2.02   | 1.E-33 |
| P60709 | IWHHTFYNELRVAPEEHPVLLTEAPLNPK                                                       | 3449.78 | 3449.79 | -0.01 | -2.37   | 1.E-33 |
| P22626 | RSRGFGFVTFSSMAEVDAAMAARPHSIDGRVVEPK                                                 | 3777.89 | 3777.88 | 0.01  | 2.65    | 1.E-33 |
| P22626 | LFIGGLSFETTEESLRNYEQWGK                                                             | 2866.37 | 2866.38 | -0.01 | -2.14   | 2.E-33 |
| P08670 | TVETRDGQVINETSQHDDLE                                                                | 2422.09 | 2422.10 | -0.01 | -3.65   | 2.E-33 |
| P06748 | LAADEDDEDEDEDEDEDEDEDEDEDEDEEAEKAPVK                                                | 4117.44 | 4117.45 | -0.01 | -1.56   | 2.E-33 |
| A2BDF6 | STELLIRKLPFQRLVREIAQDFKTDLRFQSSAVMALQEASEAYL<br>VGLFEDTNLCAIHAKRVTIMPKDIQLARRIRGERA | 9082.91 | 9082.91 | 0.00  | -0.23   | 2.E-33 |
| P22626 | RSRGFGFVTFSSMAEVDAAMAARPHSIDGRVVEPK                                                 | 3777.81 | 3777.88 | -0.07 | -18.10  | 2.E-33 |
| P08670 | TVETRDGQVINETSQHDDLE                                                                | 2422.04 | 2422.10 | -0.06 | -25.04  | 2.E-33 |
| P05387 | ILDSVGIEADDDRLNK                                                                    | 1771.90 | 1771.90 | 0.00  | -1.11   | 2.E-33 |

|        |                                           |         |         |       |        |        |
|--------|-------------------------------------------|---------|---------|-------|--------|--------|
| P0C0S8 | TRIIPRHLQLAIRNDEELNK                      | 2428.41 | 2428.37 | 0.04  | 18.02  | 3.E-33 |
| P0C0S8 | TRIIPRHLQLAIRNDEELNK                      | 2428.43 | 2428.37 | 0.06  | 25.68  | 3.E-33 |
| P0C0S8 | TRIIPRHLQLAIRNDEELNK                      | 2428.45 | 2428.37 | 0.08  | 31.12  | 3.E-33 |
| Q6F113 | GNYAERVGAGAPVYMAAVLEYLTAEILELAGNAARDNKK   | 4108.00 | 4108.11 | -0.11 | -27.96 | 3.E-33 |
| Q6F113 | GNYAERVGAGAPVYMAAVLEYLTAEILELAGNAARDNKK   | 4108.09 | 4108.11 | -0.02 | -3.89  | 3.E-33 |
| P06748 | VDNDENEHQLSLRTVSLGAGAKDELHIVEAEAMNYEGSPIK | 4478.08 | 4478.17 | -0.09 | -19.72 | 3.E-33 |
| P06748 | VDNDENEHQLSLRTVSLGAGAKDELHIVEAEAMNYEGSPIK | 4478.17 | 4478.17 | 0.00  | -1.07  | 3.E-33 |
| P0C0S8 | TRIIPRHLQLAIRNDEELNK                      | 2428.30 | 2428.37 | -0.07 | -28.96 | 3.E-33 |
| P0C0S8 | TRIIPRHLQLAIRNDEELNK                      | 2428.32 | 2428.37 | -0.05 | -18.88 | 3.E-33 |
| P0C0S8 | TRIIPRHLQLAIRNDEELNK                      | 2428.37 | 2428.37 | 0.00  | -1.95  | 3.E-33 |
| P62805 | VFLENVIRDAVITYTEHAK                       | 2104.10 | 2104.10 | 0.00  | -1.79  | 3.E-33 |
| P33778 | AMGIMNSFVNDIFERIAGEASRLAHYNK              | 3153.55 | 3153.55 | 0.00  | -1.51  | 3.E-33 |
| P33778 | AMGIMNSFVNDIFERIAGEASRLAHYNK              | 3154.48 | 3153.55 | 0.93  | 294.99 | 3.E-33 |
| P06748 | GGSLPKVEAKFINYVK                          | 1748.98 | 1748.98 | 0.00  | 1.11   | 4.E-33 |
| P0C0S8 | TRIIPRHLQLAIRNDEELNK                      | 2428.37 | 2428.37 | 0.00  | -1.46  | 4.E-33 |



|        |                                                                                     |         |         |       |          |        |
|--------|-------------------------------------------------------------------------------------|---------|---------|-------|----------|--------|
| P06748 | VDNDENEHQLSLRTVSLGAGAKDELHIVEAEAMNYEGSPIK                                           | 4478.16 | 4478.17 | -0.01 | -1.45    | 6.E-33 |
| P08729 | LEAAIAEAEERGELALK                                                                   | 1811.96 | 1811.96 | 0.00  | -2.28    | 6.E-33 |
| P16403 | (51)SETAPAAPAAAPPAEKAPVK                                                            | 1915.01 | 1915.01 | 0.00  | 0.33     | 7.E-33 |
| P22626 | LFIGGLSFETTEESLRNYEQWGK                                                             | 2866.37 | 2866.38 | -0.01 | -2.98    | 7.E-33 |
| P22626 | RGFGFVTFDDHDPVDKIVLQK                                                               | 2432.25 | 2432.25 | 0.00  | -1.97    | 7.E-33 |
| P05787 | TEISEMNRNISRLQAEIEGLK                                                               | 2430.25 | 2430.25 | 0.00  | -1.99    | 8.E-33 |
| A2BDF6 | STELLIRKLPFQRLVREIAQDFKTDLRFQSSAVMALQEASEAYL<br>VGLFEDTNLCAIHAKRVTIMPKDIQLARRIRGERA | 9082.92 | 9082.91 | 0.01  | 1.25     | 8.E-33 |
| Q04695 | SEISELRRTMQALEIELQSQLSMK                                                            | 2819.44 | 2819.45 | -0.01 | -1.95    | 8.E-33 |
| P25398 | (41)AEEGIAAGGVM DVNTALQEVLK                                                         | 2256.12 | 2256.13 | -0.01 | -2.50    | 8.E-33 |
| P07355 | AYTNFDAERDALNIETAIK                                                                 | 2154.05 | 2154.06 | -0.01 | -2.91    | 9.E-33 |
| P09651 | RSRGGFVTYATVEEVDAAMNARPHKVDGRVVEPK                                                  | 3887.99 | 3887.99 | 0.00  | -0.99    | 9.E-33 |
| P25398 | (41)AEEGIAAGGVM DVNTALQEVLK                                                         | 2256.08 | 2256.13 | -0.05 | -21.61   | 1.E-32 |
| P08670 | TVETRDGQVINETSQHDDLE                                                                | 2422.09 | 2422.10 | -0.01 | -2.45    | 1.E-32 |
| P0C0S8 | GNYAERVGAGAPVYLA AVLEYLTAEILELAGNAARDNK                                             | 3962.05 | 3962.05 | 0.00  | 0.05     | 1.E-32 |
| P07355 | AYTNFDAERDALNIETAIK                                                                 | 2151.05 | 2154.06 | -3.01 | -1397.40 | 1.E-32 |

|        |                                         |         |         |       |          |        |
|--------|-----------------------------------------|---------|---------|-------|----------|--------|
| P05783 | YETELAMRQSVENDIHGLRK                    | 2388.14 | 2388.19 | -0.05 | -19.54   | 1.E-32 |
| P62081 | IVKPNGEKPDEFESGISQALLELEMNSDLK          | 3330.65 | 3329.67 | 0.98  | 292.79   | 1.E-32 |
| P16403 | (51)SETAPAAPAAAPPAEKAPVK                | 1915.01 | 1915.01 | 0.00  | 1.06     | 1.E-32 |
| P05787 | TEISEMNRNISRLQAEIEGLK                   | 2427.10 | 2430.25 | -3.15 | -1296.71 | 1.E-32 |
| P62736 | AGFAGDDAPRAVFPSIVGRPRHQGVMVGMGQK        | 3307.67 | 3307.68 | -0.01 | -2.63    | 1.E-32 |
| P05204 | VKDEPQRRSARLSAKPAPPKPEPKPK              | 2906.65 | 2906.66 | -0.01 | -2.95    | 1.E-32 |
| P06748 | LAADEDDEDEDEDEDEDEDEDEDEDEDEDEEAEKAPVKK | 4245.55 | 4245.54 | 0.01  | 1.61     | 2.E-32 |
| Q13185 | KVEEAEPEEFVVEK                          | 1660.82 | 1660.82 | 0.00  | -2.01    | 2.E-32 |
| O14979 | MFIGGLSWDTSKK                           | 1468.72 | 1468.74 | -0.02 | -16.42   | 2.E-32 |
| O14979 | MFIGGLSWDTSKK                           | 1468.74 | 1468.74 | 0.00  | -1.58    | 2.E-32 |
| O14979 | MFIGGLSWDTSKK                           | 1470.73 | 1468.74 | 1.99  | 1351.50  | 2.E-32 |
| P62736 | AGFAGDDAPRAVFPSIVGRPRHQGVMVGMGQK        | 3307.67 | 3307.68 | -0.01 | -2.03    | 2.E-32 |
| O60506 | ALLERTGYTLDVTTGQRK                      | 2021.09 | 2021.09 | 0.00  | -1.00    | 2.E-32 |
| O60506 | ALLERTGYTLDVTTGQRK                      | 2025.07 | 2021.09 | 3.98  | 1967.72  | 2.E-32 |
| P22626 | RGFGFVTFDDHDPVDK                        | 1850.84 | 1850.86 | -0.02 | -13.03   | 2.E-32 |

|        |                                                                |         |         |       |          |        |
|--------|----------------------------------------------------------------|---------|---------|-------|----------|--------|
| P22626 | RGFGFVTFDDHDPVDK                                               | 1850.86 | 1850.86 | 0.00  | -1.41    | 2.E-32 |
| P62304 | VMVQPINLIFRYLQNRSRISQVWLYEQVNMRIEGCIIGFDEYMN<br>LVLDAAEEIHSKTK | 6869.49 | 6869.50 | -0.01 | -0.88    | 2.E-32 |
| P22626 | KRGFGFVTFDDHDPVDK                                              | 1978.95 | 1978.95 | 0.00  | -1.20    | 2.E-32 |
| P18077 | IEGVYARDETEFYLGK                                               | 1892.96 | 1888.92 | 4.04  | 2133.51  | 2.E-32 |
| P16403 | (51)SETAPAAPAAAPPAEKAPVK                                       | 1915.01 | 1915.01 | 0.00  | -2.28    | 2.E-32 |
| P22626 | KRGFGFVTFDDHDPVDK                                              | 1976.01 | 1978.95 | -2.94 | -1485.80 | 3.E-32 |
| P22626 | KRGFGFVTFDDHDPVDK                                              | 1982.94 | 1978.95 | 3.99  | 2013.73  | 3.E-32 |
| P05386 | KVEAKKEESEESDDDMGFGLFD                                         | 2504.05 | 2504.09 | -0.04 | -17.46   | 3.E-32 |
| P05386 | KVEAKKEESEESDDDMGFGLFD                                         | 2504.09 | 2504.09 | 0.00  | 0.87     | 3.E-32 |
| P22626 | IDTIEIITDRQSGKK                                                | 1715.91 | 1715.94 | -0.03 | -17.68   | 3.E-32 |
| P22626 | IDTIEIITDRQSGKK                                                | 1715.94 | 1715.94 | 0.00  | -1.83    | 3.E-32 |
| P18077 | IEGVYARDETEFYLGK                                               | 1888.92 | 1888.92 | 0.00  | -1.72    | 3.E-32 |
| Q04695 | VRALEEANTELEVK                                                 | 1596.86 | 1599.85 | -2.99 | -1872.91 | 3.E-32 |
| Q04695 | VRALEEANTELEVK                                                 | 1599.82 | 1599.85 | -0.03 | -17.29   | 3.E-32 |
| Q04695 | VRALEEANTELEVK                                                 | 1599.85 | 1599.85 | 0.00  | -1.35    | 3.E-32 |

|        |                                                 |         |         |       |          |        |
|--------|-------------------------------------------------|---------|---------|-------|----------|--------|
| Q04695 | (52)TTSIRQFTSSSSIK                              | 1583.82 | 1583.82 | 0.00  | -1.22    | 3.E-32 |
| P62805 | VFLENVIRDAVITYTEHAK                             | 2147.08 | 2104.10 | 42.98 | 20016.30 | 3.E-32 |
| P62805 | VFLENVIRDAVITYTEHAK                             | 2147.10 | 2104.10 | 43.00 | 20027.80 | 3.E-32 |
| P62805 | VFLENVIRDAVITYTEHAK                             | 2104.09 | 2104.10 | -0.01 | -2.45    | 4.E-32 |
| P33778 | RSTITSREIQTAVRLLLLPGELAK                        | 2551.45 | 2551.48 | -0.03 | -13.34   | 4.E-32 |
| Q04695 | (52)TTSIRQFTSSSSIK                              | 1585.86 | 1583.82 | 2.04  | 1286.92  | 4.E-32 |
| P62736 | AGFAGDDAPRAVFPSIVGRPRHQGVMVGMGQKDSYVGDEA<br>QSK | 4487.20 | 4487.19 | 0.01  | 1.58     | 5.E-32 |
| P62805 | VFLENVIRDAVITYTEHAK                             | 2104.10 | 2104.10 | 0.00  | -1.98    | 5.E-32 |
| Q15233 | TFTQRSRLFVGNLPPDITEEEMRK                        | 2863.47 | 2863.47 | 0.00  | -0.43    | 5.E-32 |
| Q12905 | GTMTTGHNVADLVILK                                | 1770.86 | 1767.96 | 2.90  | 1637.36  | 5.E-32 |
| P33778 | RSTITSREIQTAVRLLLLPGELAK                        | 2551.48 | 2551.48 | 0.00  | -1.15    | 5.E-32 |
| O43390 | YGGPPPSVYSGVQPGIGTEVFVGKIPRDLYEDELVPLFEK        | 4463.26 | 4463.26 | 0.00  | -0.17    | 5.E-32 |
| P62805 | VFLENVIRDAVITYTEHAK                             | 2104.09 | 2104.10 | -0.01 | -3.22    | 6.E-32 |
| P33778 | RSTITSREIQTAVRLLLLPGELAK                        | 2553.45 | 2551.48 | 1.97  | 770.01   | 6.E-32 |
| P08758 | (41)AQLVLRGTVTDFPGFDERADAETLRK                  | 2833.44 | 2833.44 | 0.00  | -1.29    | 7.E-32 |

|        |                              |         |         |       |          |        |
|--------|------------------------------|---------|---------|-------|----------|--------|
| P51991 | IFVGGIKEDTEEYNLRDYFEK        | 2564.24 | 2564.24 | 0.00  | -1.22    | 8.E-32 |
| P33778 | RSTITREIQTAVRLLLPGELAK       | 2551.48 | 2551.48 | 0.00  | -0.64    | 8.E-32 |
| P36578 | APIRPDIVNFVHTNLRK            | 1989.13 | 1989.13 | 0.00  | 0.31     | 8.E-32 |
| P62805 | VFLENVIRDAVITYTEHAK          | 2104.05 | 2104.10 | -0.05 | -23.03   | 1.E-31 |
| P60709 | RGILTLKYPIE(317)HGIVTNWDDMEK | 2741.41 | 2741.42 | -0.01 | -2.76    | 1.E-31 |
| P51991 | IFVGGIKEDTEEYNLRDYFEK        | 2560.34 | 2564.24 | -3.90 | -1523.99 | 1.E-31 |
| P51991 | RGFAFVTFDDHDTVDK             | 1870.87 | 1868.87 | 2.00  | 1070.90  | 1.E-31 |
| P51991 | RGFAFVTFDDHDTVDK             | 1871.10 | 1868.87 | 2.23  | 1190.22  | 1.E-31 |
| Q99880 | AMGIMNSFVNDIFERIASEASRLAHYNK | 3179.56 | 3183.56 | -4.00 | -1259.15 | 1.E-31 |
| O75367 | AASADSTTEGTPADGFTVLSTK       | 2126.00 | 2126.00 | 0.00  | -2.30    | 2.E-31 |
| P22626 | KRGFGFVTFDDHDPVDKIVLQK       | 2560.34 | 2560.34 | 0.00  | -1.58    | 2.E-31 |
| Q99880 | AMGIMNSFVNDIFERIASEASRLAHYNK | 3183.55 | 3183.56 | -0.01 | -2.93    | 2.E-31 |
| P07355 | DIISDTSGDFRK                 | 1352.66 | 1352.66 | 0.00  | -2.28    | 2.E-31 |
| P19338 | GYAFIEFASFEDAK               | 1593.71 | 1593.74 | -0.03 | -17.00   | 2.E-31 |
| P19338 | GYAFIEFASFEDAK               | 1593.74 | 1593.74 | 0.00  | -2.19    | 2.E-31 |

|        |                                                        |         |         |       |         |        |
|--------|--------------------------------------------------------|---------|---------|-------|---------|--------|
| P16403 | (51)SETAPAAPAAAPPAEKAPVK                               | 1915.01 | 1915.01 | 0.00  | 0.96    | 2.E-31 |
| P51991 | IFVGGIKEDTEEYNLRDYFEK                                  | 2565.24 | 2564.24 | 1.00  | 389.38  | 2.E-31 |
| P62736 | AGFAGDDAPRAVFPSIVGRPRHQGVMVGMGQK                       | 3307.67 | 3307.68 | -0.01 | -2.88   | 2.E-31 |
| P51991 | GGSFGRSSGSPYGGGYGSGGGSGGYGSRRF                         | 2831.23 | 2831.24 | -0.01 | -2.11   | 2.E-31 |
| P07355 | DIISDTSGDFRK                                           | 1351.73 | 1352.66 | -0.93 | -688.00 | 2.E-31 |
| P05388 | RVLALSVETDYTFPLAEK                                     | 2051.09 | 2051.09 | 0.00  | -1.59   | 3.E-31 |
| P04083 | QAWFIENEEQEYVQTVK                                      | 2139.96 | 2140.01 | -0.05 | -21.25  | 3.E-31 |
| Q548L2 | LQEEMLQREEAENTLQSFRQDVNDNASLARLDLERKVESLQE<br>EIAFLK   | 5560.80 | 5560.81 | -0.01 | -0.99   | 3.E-31 |
| Q7L4M3 | TTSGYAGGLSSAYGGLTSPGLSYSLSGSSFGSGAGSSSFRTS<br>SSRAVVVK | 4739.31 | 4739.30 | 0.01  | 1.91    | 3.E-31 |
| P14136 | LALDIEIATYRK                                           | 1408.86 | 1404.80 | 4.06  | 2879.12 | 3.E-31 |
| P20700 | SLEGDLEDLKDQIAQLEASLAAKK                               | 2655.40 | 2655.40 | 0.00  | -0.61   | 3.E-31 |
| P33778 | AMGIMNSFVNDIFERIAGEASRLAHYNK                           | 3153.51 | 3153.55 | -0.04 | -13.85  | 3.E-31 |
| P33778 | AMGIMNSFVNDIFERIAGEASRLAHYNK                           | 3153.55 | 3153.55 | 0.00  | -0.65   | 3.E-31 |
| P33778 | AMGIMNSFVNDIFERIAGEASRLAHYNK                           | 3154.14 | 3153.55 | 0.59  | 187.73  | 3.E-31 |
| P33778 | AMGIMNSFVNDIFERIAGEASRLAHYNK                           | 3154.34 | 3153.55 | 0.79  | 251.19  | 3.E-31 |

|        |                                                                                     |         |         |       |          |        |
|--------|-------------------------------------------------------------------------------------|---------|---------|-------|----------|--------|
| P33778 | AMGIMNSFVNDIFERIAGEASRLAHYNK                                                        | 3154.74 | 3153.55 | 1.19  | 378.14   | 3.E-31 |
| P33778 | AMGIMNSFVNDIFERIAGEASRLAHYNK                                                        | 3154.94 | 3153.55 | 1.39  | 441.73   | 3.E-31 |
| P07355 | DIISDTSGDFRK                                                                        | 1354.65 | 1352.66 | 1.99  | 1465.42  | 3.E-31 |
| P04083 | QAWFIENEEQEYVQTVK                                                                   | 2140.01 | 2140.01 | 0.00  | 0.85     | 3.E-31 |
| P05388 | RVLALSVETDYTFPLAEK                                                                  | 2048.11 | 2051.09 | -2.98 | -1454.30 | 3.E-31 |
| P14136 | LALDIEIATYRK                                                                        | 1403.78 | 1404.80 | -1.02 | -727.92  | 3.E-31 |
| P14136 | LALDIEIATYRK                                                                        | 1404.80 | 1404.80 | 0.00  | -1.59    | 3.E-31 |
| P60903 | EFPGFLENQKDPLAVDK                                                                   | 1945.98 | 1945.98 | 0.00  | -1.80    | 4.E-31 |
| P05387 | ILDSVGIEADDDRLNK                                                                    | 1771.90 | 1771.90 | 0.00  | -1.17    | 4.E-31 |
| P08729 | DARAKQEELEAALQRAK                                                                   | 1926.03 | 1926.03 | 0.00  | -1.22    | 5.E-31 |
| A5PLR1 | STELLIRKLPFQRLVREIAQDFKTDLRFQSSAVMALQEACEAY<br>LVGLFEDTNLCAIHAKRVTIMPKDIQLARRIRGERA | 9098.66 | 9098.88 | -0.22 | -24.32   | 5.E-31 |
| A5PLR1 | STELLIRKLPFQRLVREIAQDFKTDLRFQSSAVMALQEACEAY<br>LVGLFEDTNLCAIHAKRVTIMPKDIQLARRIRGERA | 9098.86 | 9098.88 | -0.02 | -1.85    | 5.E-31 |
| P02545 | EGDLIAAQARLK                                                                        | 1285.67 | 1283.72 | 1.95  | 1513.76  | 5.E-31 |
| P07355 | AYTNFDAERDALNIETAIK                                                                 | 2154.05 | 2154.06 | -0.01 | -3.66    | 5.E-31 |
| P51991 | IFVGGIKEDTEEYNLRDYFEK                                                               | 2565.24 | 2564.24 | 1.00  | 390.83   | 5.E-31 |

|        |                               |         |         |       |          |        |
|--------|-------------------------------|---------|---------|-------|----------|--------|
| P05387 | ILDSVGIEADDDRLNK              | 1766.97 | 1771.90 | -4.93 | -2791.27 | 6.E-31 |
| P07355 | AYTNFDAERDALNIETAIK           | 2151.05 | 2154.06 | -3.01 | -1398.98 | 6.E-31 |
| P07355 | AYTNFDAERDALNIETAIK           | 2154.01 | 2154.06 | -0.05 | -22.09   | 6.E-31 |
| P02545 | EGDLIAAQARLK                  | 1283.72 | 1283.72 | 0.00  | -0.79    | 6.E-31 |
| P08670 | FADLSEAAANRNDALRQAK           | 2103.05 | 2103.05 | 0.00  | -1.23    | 6.E-31 |
| P62805 | VFLENVIRDAVITYTEHAK           | 2104.10 | 2104.10 | 0.00  | -1.08    | 7.E-31 |
| P08670 | TVETRDGQVINETSQHDDLE          | 2422.10 | 2422.10 | 0.00  | 1.14     | 7.E-31 |
| P63220 | (49)MQNDAGEFVDLYVPRK          | 1922.92 | 1922.92 | 0.00  | -1.69    | 7.E-31 |
| P25705 | RTGAIVDVPVGEELLGRVVDALGNAIDGK | 2932.59 | 2932.60 | -0.01 | -2.08    | 7.E-31 |
| P02545 | EGDLIAAQARLK                  | 1287.62 | 1283.72 | 3.90  | 3031.54  | 8.E-31 |
| P04908 | LLGRVTIAQGGVLPNIQAVLLPK       | 2369.44 | 2369.45 | -0.01 | -2.61    | 1.E-30 |
| Q04695 | (52)TTSIRQFTSSSSIK            | 1583.82 | 1583.82 | 0.00  | -0.09    | 1.E-30 |
| Q04695 | (52)TTSIRQFTSSSSIK            | 1584.79 | 1583.82 | 0.97  | 611.10   | 1.E-30 |
| P62913 | VLEQLTGQTPVFSK                | 1545.84 | 1545.84 | 0.00  | -2.03    | 1.E-30 |
| P0C0S8 | TRIIPRHLQLAIRNDEELNK          | 2429.33 | 2428.37 | 0.96  | 396.02   | 1.E-30 |



|        |                                                        |         |         |       |          |        |
|--------|--------------------------------------------------------|---------|---------|-------|----------|--------|
| P05787 | KIETRDGKLVSESSDVLPK                                    | 2100.14 | 2100.14 | 0.00  | -1.57    | 1.E-30 |
| P05787 | KIETRDGKLVSESSDVLPK                                    | 2103.04 | 2100.14 | 2.90  | 1379.05  | 1.E-30 |
| O43390 | VLFVRNLATTVTEEILEK                                     | 2077.12 | 2074.17 | 2.95  | 1418.96  | 1.E-30 |
| P16403 | AGGTPRKASGPPVSELITK                                    | 1865.04 | 1865.04 | 0.00  | 1.06     | 1.E-30 |
| P62913 | VLEQLTGQTPVFSK                                         | 1545.82 | 1545.84 | -0.02 | -15.42   | 1.E-30 |
| O14979 | VFVGGLSPDTSEEQIK                                       | 1704.86 | 1704.86 | 0.00  | -1.82    | 1.E-30 |
| P62736 | AGFAGDDAPRAVFPSIVGRPRHQGVMVGMGQK                       | 3307.67 | 3307.68 | -0.01 | -1.64    | 2.E-30 |
| P0C0S8 | TRIIPRHLQLAIRNDEELNK                                   | 2428.36 | 2428.37 | -0.01 | -3.72    | 2.E-30 |
| P16403 | KAGGTPRKASGPPVSELITK                                   | 1993.13 | 1993.13 | 0.00  | 0.77     | 2.E-30 |
| P60709 | RGILTLKYPIE(317)HGIVTNWDDMEK                           | 2741.41 | 2741.42 | -0.01 | -2.76    | 2.E-30 |
| P62913 | VLEQLTGQTPVFSK                                         | 1543.89 | 1545.84 | -1.95 | -1261.51 | 2.E-30 |
| O75934 | (41)AGTGLVAGEVVVDALPYFDQGYEAPGVREAAAALVEEET<br>RRYRPTK | 4962.51 | 4962.52 | -0.01 | -1.49    | 2.E-30 |
| P22626 | RGFGFVTFDDHDPVDK                                       | 1854.85 | 1850.86 | 3.99  | 2152.35  | 2.E-30 |
| P09651 | PRNQGGYGGSSSSSSSYGSGRRF                                | 2250.02 | 2250.02 | 0.00  | -2.00    | 2.E-30 |
| P07355 | SALSGHLETVILGLLK                                       | 1649.96 | 1649.97 | -0.01 | -3.19    | 2.E-30 |

|        |                                                                                     |         |         |       |          |        |
|--------|-------------------------------------------------------------------------------------|---------|---------|-------|----------|--------|
| P02545 | EGDLIAAQARLK                                                                        | 1288.61 | 1283.72 | 4.89  | 3791.14  | 3.E-30 |
| O14979 | VFVGGLSPDTSEEQIK                                                                    | 1704.86 | 1704.86 | 0.00  | -1.82    | 3.E-30 |
| P33778 | RSTITSREIQTAVRLLLLPGELAK                                                            | 2548.47 | 2551.48 | -3.01 | -1180.09 | 3.E-30 |
| P16403 | (51)SETAPAAPAAAPPAEKAPVK                                                            | 1915.01 | 1915.01 | 0.00  | -2.23    | 3.E-30 |
| P16403 | (51)SETAPAAPAAAPPAEKAPVK                                                            | 1914.97 | 1915.01 | -0.04 | -18.94   | 3.E-30 |
| P16403 | (51)SETAPAAPAAAPPAEKAPVK                                                            | 1915.01 | 1915.01 | 0.00  | 0.80     | 3.E-30 |
| A5PLR1 | STELLIRKLPFQRLVREIAQDFKTDLRFQSSAVMALQEACEAY<br>LVGLFEDTNLCAIHAKRVTIMPKDIQLARRIRGERA | 9098.85 | 9098.88 | -0.03 | -3.69    | 3.E-30 |
| P61978 | IDEPLEGSEDRIITITGTQDQIQNAQYLLQNSVK                                                  | 3828.83 | 3828.94 | -0.11 | -27.97   | 3.E-30 |
| P61978 | IDEPLEGSEDRIITITGTQDQIQNAQYLLQNSVK                                                  | 3828.93 | 3828.94 | -0.01 | -2.14    | 3.E-30 |
| P02545 | EGDLIAAQARLK                                                                        | 1284.72 | 1283.72 | 1.00  | 779.77   | 3.E-30 |
| P02545 | EGDLIAAQARLK                                                                        | 1287.62 | 1283.72 | 3.90  | 3032.32  | 3.E-30 |
| P08865 | (51)SGALDVLQMKEEDVLK                                                                | 1815.89 | 1815.93 | -0.04 | -21.27   | 3.E-30 |
| P08865 | (51)SGALDVLQMKEEDVLK                                                                | 1815.93 | 1815.93 | 0.00  | -2.16    | 3.E-30 |
| P07355 | SALSGHLETVILGLLK                                                                    | 1649.97 | 1649.97 | 0.00  | -2.65    | 4.E-30 |
| P33778 | RSTITSREIQTAVRLLLLPGELAK                                                            | 2553.35 | 2551.48 | 1.87  | 731.38   | 4.E-30 |

|        |                                                           |         |         |       |         |        |
|--------|-----------------------------------------------------------|---------|---------|-------|---------|--------|
| P05787 | KIETRDGKLVSESSDVLPK                                       | 2100.14 | 2100.14 | 0.00  | 0.62    | 4.E-30 |
| Q15046 | (41)AAVQAAEVKVDGSEPK                                      | 1639.84 | 1639.84 | 0.00  | 0.91    | 4.E-30 |
| P22626 | RGFGFVTFDDHDPVDK                                          | 1850.86 | 1850.86 | 0.00  | -1.74   | 4.E-30 |
| P0C0S8 | TRIIPRHLQLAIRNDEELNK                                      | 2431.35 | 2428.37 | 2.98  | 1226.38 | 5.E-30 |
| P33778 | RSTITSREIQTAVRLLLPGELAK                                   | 2551.47 | 2551.48 | -0.01 | -3.11   | 5.E-30 |
| P33778 | RSTITSREIQTAVRLLLPGELAK                                   | 2551.55 | 2551.48 | 0.07  | 25.58   | 5.E-30 |
| P33778 | RSTITSREIQTAVRLLLPGELAK                                   | 2552.43 | 2551.48 | 0.95  | 372.07  | 5.E-30 |
| Q00839 | NQSQGYNQWQQQFWGQK                                         | 2210.99 | 2210.99 | -0.01 | -2.27   | 5.E-30 |
| P08670 | TVETRDGQVINETSQHDDLE                                      | 2422.09 | 2422.10 | -0.01 | -2.21   | 5.E-30 |
| P33778 | RSTITSREIQTAVRLLLPGELAK                                   | 2551.37 | 2551.48 | -0.11 | -43.79  | 6.E-30 |
| P33778 | RSTITSREIQTAVRLLLPGELAK                                   | 2551.40 | 2551.48 | -0.08 | -31.76  | 6.E-30 |
| P0C0S8 | TRIIPRHLQLAIRNDEELNK                                      | 2428.34 | 2428.37 | -0.03 | -13.81  | 6.E-30 |
| P0C0S8 | TRIIPRHLQLAIRNDEELNK                                      | 2428.36 | 2428.37 | -0.01 | -2.11   | 6.E-30 |
| P05387 | LASVPAGGAVAVSAAPGSAAPAAGSAPAAAEKKDEKKEESE<br>ESDDDMGFGLFD | 5204.43 | 5204.43 | 0.00  | 0.94    | 6.E-30 |
| P07355 | WISIMTERSVPHLQK                                           | 1823.93 | 1823.97 | -0.04 | -21.22  | 7.E-30 |

|        |                              |         |         |       |          |        |
|--------|------------------------------|---------|---------|-------|----------|--------|
| P07355 | WISIMTERSVPHLQK              | 1823.97 | 1823.97 | 0.00  | -2.47    | 7.E-30 |
| P0C0S8 | TRIIPRHLQLAIRNDEELNK         | 2428.37 | 2428.37 | 0.00  | -1.41    | 7.E-30 |
| P07355 | SLYYYIQQDTKGDYQK             | 2016.02 | 2011.95 | 4.07  | 2017.53  | 7.E-30 |
| P04908 | LLGRVTIAQGGVLPNIQAVLLPK      | 2369.44 | 2369.45 | -0.01 | -4.63    | 8.E-30 |
| P04908 | LLGRVTIAQGGVLPNIQAVLLPK      | 2369.94 | 2369.45 | 0.49  | 208.62   | 8.E-30 |
| P05787 | LKLEAELGNMQGLVEDFK           | 2033.05 | 2033.05 | 0.00  | -2.40    | 8.E-30 |
| P33778 | AMGIMNSFVNDIFERIAGEASRLAHYNK | 3191.49 | 3153.55 | 37.94 | 11887.90 | 8.E-30 |
| P33778 | AMGIMNSFVNDIFERIAGEASRLAHYNK | 3198.50 | 3153.55 | 44.95 | 14054.20 | 8.E-30 |
| Q9H307 | (41)AVAVRTLQEQLK             | 1525.85 | 1525.85 | 0.00  | -0.60    | 8.E-30 |
| P08670 | TVETRDGQVINETSQHDDLE         | 2422.05 | 2422.10 | -0.05 | -22.48   | 9.E-30 |
| P60709 | DLYANTVLSGGTTMYPGIADRMQK     | 2603.21 | 2601.26 | 1.95  | 749.97   | 9.E-30 |
| P07355 | SLYYYIQQDTKGDYQK             | 2011.94 | 2011.95 | -0.01 | -2.74    | 1.E-29 |
| P07355 | SLYYYIQQDTKGDYQK             | 2012.91 | 2011.95 | 0.96  | 476.91   | 1.E-29 |
| P0C0S8 | TRIIPRHLQLAIRNDEELNK         | 2428.30 | 2428.37 | -0.07 | -29.99   | 1.E-29 |
| P0C0S8 | TRIIPRHLQLAIRNDEELNK         | 2428.42 | 2428.37 | 0.05  | 18.93    | 1.E-29 |

|        |                                                  |         |         |       |          |        |
|--------|--------------------------------------------------|---------|---------|-------|----------|--------|
| P0C0S8 | TRIIPRHLQLAIRNDEELNK                             | 2428.43 | 2428.37 | 0.06  | 25.56    | 1.E-29 |
| P07355 | SLYYYYIQQDTKGDYQK                                | 2014.13 | 2011.95 | 2.18  | 1084.18  | 1.E-29 |
| P60709 | DLYANTVLSGGTTMYPGIADRMQK                         | 2601.25 | 2601.26 | -0.01 | -2.65    | 1.E-29 |
| P0C0S8 | TRIIPRHLQLAIRNDEELNK                             | 2428.36 | 2428.37 | -0.01 | -4.01    | 1.E-29 |
| P0C0S8 | TRIIPRHLQLAIRNDEELNK                             | 2429.33 | 2428.37 | 0.96  | 395.57   | 1.E-29 |
| P04083 | ALTGHLEEVVLALLK                                  | 1604.95 | 1604.95 | 0.00  | -2.12    | 1.E-29 |
| P62805 | VFLENVIRDAVITYTEHAK                              | 2104.10 | 2104.10 | 0.00  | -1.27    | 1.E-29 |
| P09651 | GGNFGGRSSGPYGGGGQYFAKPRNQGGYGGSSSSSSSYGS<br>GRRF | 4251.93 | 4251.92 | 0.01  | 1.61     | 1.E-29 |
| P60709 | DLYANTVLSGGTTMYPGIADRMQK                         | 2597.38 | 2601.26 | -3.88 | -1493.92 | 1.E-29 |
| P05787 | KIETRDGKLVSESSDVLPK                              | 2100.14 | 2100.14 | 0.00  | -1.57    | 1.E-29 |
| P04083 | ALTGHLEEVVLALLK                                  | 1604.85 | 1604.95 | -0.10 | -64.93   | 1.E-29 |
| P04083 | ALTGHLEEVVLALLK                                  | 1604.92 | 1604.95 | -0.03 | -17.13   | 1.E-29 |
| P05388 | ISRGTIEILSDVQLIK                                 | 1784.04 | 1784.04 | 0.00  | -1.41    | 2.E-29 |
| P07355 | DIISDTSGDFRK                                     | 1352.64 | 1352.66 | -0.02 | -15.29   | 2.E-29 |
| P07355 | DIISDTSGDFRK                                     | 1352.66 | 1352.66 | 0.00  | -1.02    | 2.E-29 |

|        |                                       |         |         |       |          |        |
|--------|---------------------------------------|---------|---------|-------|----------|--------|
| P07355 | DIISDTSGDFRK                          | 1352.68 | 1352.66 | 0.02  | 18.20    | 2.E-29 |
| P07355 | DIISDTSGDFRK                          | 1352.69 | 1352.66 | 0.03  | 25.66    | 2.E-29 |
| P60709 | IWHHTFYNELRVAPEEHPVLLTEAPLNPK         | 3449.80 | 3449.79 | 0.01  | 1.57     | 2.E-29 |
| Q00839 | HAAENPGKYNILGTNTIMDK                  | 2186.07 | 2186.08 | -0.01 | -2.32    | 2.E-29 |
| P07355 | DIISDTSGDFRK                          | 1352.62 | 1352.66 | -0.04 | -28.67   | 2.E-29 |
| Q04695 | (52)TTSIRQFTSSSSIK                    | 1583.82 | 1583.82 | 0.00  | -2.04    | 2.E-29 |
| P19338 | KMAPPPKEVEEDESEDEEMSEDEEDDSSGEEVVIPQK | 4061.74 | 4061.73 | 0.01  | 1.52     | 2.E-29 |
| Q04695 | (52)TTSIRQFTSSSSIK                    | 1584.78 | 1583.82 | 0.96  | 607.63   | 3.E-29 |
| Q8NC51 | DRKNPLPPSVGVVDKKEETQPPVALKK           | 2968.66 | 2968.67 | -0.01 | -2.08    | 3.E-29 |
| Q04695 | VRALEEANTELEVK                        | 1596.86 | 1599.85 | -2.99 | -1872.66 | 3.E-29 |
| Q04695 | VRALEEANTELEVK                        | 1599.85 | 1599.85 | 0.00  | -1.60    | 3.E-29 |
| Q04695 | VRALEEANTELEVK                        | 1600.82 | 1599.85 | 0.97  | 608.65   | 3.E-29 |
| P22626 | SGNFGGSRNMGGPYGGGNYGPGGSGGSGGYGGRSRY  | 3357.43 | 3357.44 | -0.01 | -1.58    | 3.E-29 |
| Q53HU8 | LLEGEESRISLPLPNFSSLNLRNLDLPLVDTHSK    | 4133.04 | 4133.16 | -0.12 | -28.96   | 3.E-29 |
| Q53HU8 | LLEGEESRISLPLPNFSSLNLRNLDLPLVDTHSK    | 4133.14 | 4133.16 | -0.02 | -6.02    | 3.E-29 |

|        |                                                                                     |         |         |       |          |        |
|--------|-------------------------------------------------------------------------------------|---------|---------|-------|----------|--------|
| P46776 | LWTLVSEQTRVNAAK                                                                     | 1714.94 | 1714.94 | 0.00  | -0.35    | 3.E-29 |
| P22626 | IDTIEIITDRQSGKK                                                                     | 1715.91 | 1715.94 | -0.03 | -19.14   | 3.E-29 |
| P22626 | IDTIEIITDRQSGKK                                                                     | 1715.94 | 1715.94 | 0.00  | -2.47    | 3.E-29 |
| O60506 | ALLERTGYTLDVTTGQRK                                                                  | 2021.09 | 2021.09 | 0.00  | -0.16    | 4.E-29 |
| P69905 | TYFPHFDLSHGSAQVK                                                                    | 1832.88 | 1832.88 | 0.00  | -1.50    | 4.E-29 |
| P55081 | (51)SVPSALMKQPPIQSTAGAVPVRNEKGEISMEK                                                | 3420.78 | 3420.77 | 0.01  | 2.40     | 4.E-29 |
| P46776 | LWTLVSEQTRVNAAK                                                                     | 1710.91 | 1714.94 | -4.03 | -2356.29 | 4.E-29 |
| P05787 | TEISEMNRNISRLQAEIEGLK                                                               | 2430.24 | 2430.25 | -0.01 | -2.36    | 4.E-29 |
| P0C0S8 | TRIIPRHLQLAIRNDEELNK                                                                | 2428.37 | 2428.37 | 0.00  | -0.18    | 5.E-29 |
| Q99729 | MFVGGLSWDTSKK                                                                       | 1456.71 | 1454.72 | 1.99  | 1363.30  | 5.E-29 |
| O76021 | SAALPIFSSFVSNWDEATK                                                                 | 2069.00 | 2069.01 | -0.01 | -2.58    | 5.E-29 |
| A5PLR1 | STELLIRKLPFQRLVREIAQDFKTDLRFQSSAVMALQEACEAY<br>LVGLFEDTNLCAIHAKRVTIMPKDIQLARRIRGERA | 9098.88 | 9098.88 | 0.00  | 0.21     | 5.E-29 |
| P51991 | LFIGGLSFETDDSLREHFKEK                                                               | 2440.19 | 2440.19 | 0.00  | -1.89    | 5.E-29 |
| P51991 | LFIGGLSFETDDSLREHFKEK                                                               | 2441.15 | 2440.19 | 0.96  | 393.09   | 5.E-29 |
| Q7L4M3 | TTSGYAGGLSSAYGGLTSPGLSYSLSGSSFGSGAGSSSFRTS<br>SSRAVVVK                              | 4739.29 | 4739.30 | -0.01 | -2.79    | 5.E-29 |





|        |                                                                                     |         |         |       |          |        |
|--------|-------------------------------------------------------------------------------------|---------|---------|-------|----------|--------|
| P04908 | LLGRVTIAQGGVLPNIQAVLLPK                                                             | 2369.38 | 2369.45 | -0.07 | -29.96   | 1.E-28 |
| P22626 | IDTIEITDRQSGK                                                                       | 1583.82 | 1587.85 | -4.03 | -2547.26 | 2.E-28 |
| P22626 | IDTIEITDRQSGK                                                                       | 1584.78 | 1587.85 | -3.07 | -1936.60 | 2.E-28 |
| P62805 | RKTVTAMDVVYALK                                                                      | 1593.89 | 1593.89 | 0.00  | -1.33    | 2.E-28 |
| P09651 | GGNFGGRSSGPYGGGGQYFAKPRNQGGYGGSSSSSSSYGS<br>GRRF                                    | 4251.93 | 4251.92 | 0.01  | 1.40     | 2.E-28 |
| A5PLR1 | STELLIRKLPFQRLVREIAQDFKTDLRFQSSAVMALQEACEAY<br>LVGLFEDTNLCAIHAKRVTIMPKDIQLARRIRGERA | 9098.89 | 9098.88 | 0.01  | 0.92     | 2.E-28 |
| P02545 | LALDMEIHAYRK                                                                        | 1458.73 | 1458.77 | -0.04 | -24.88   | 2.E-28 |
| P02545 | LALDMEIHAYRK                                                                        | 1458.77 | 1458.77 | 0.00  | -1.23    | 2.E-28 |
| P62280 | (41)ADIQTERAYQKQPTIFQNK                                                             | 2320.18 | 2320.18 | 0.00  | 1.52     | 2.E-28 |
| P22626 | IDTIEITDRQSGK                                                                       | 1587.85 | 1587.85 | 0.00  | -1.37    | 2.E-28 |
| P67809 | GAEANVTGPGGVPVQGSK                                                                  | 1694.86 | 1694.86 | 0.00  | -2.19    | 2.E-28 |
| P62805 | VFLENVIRDAVITYTEHAK                                                                 | 2104.10 | 2104.10 | 0.00  | -1.74    | 2.E-28 |
| P16403 | ASGPPVSELITK                                                                        | 1198.65 | 1197.66 | 0.99  | 824.87   | 2.E-28 |
| P16403 | ASGPPVSELITK                                                                        | 1198.66 | 1197.66 | 1.00  | 836.29   | 2.E-28 |
| P09651 | GGNFGGRSSGPYGGGGQYFAKPRNQGGYGGSSSSSSSYGS<br>GRRF                                    | 4251.83 | 4251.92 | -0.09 | -21.18   | 2.E-28 |

|        |                                  |         |         |       |          |        |
|--------|----------------------------------|---------|---------|-------|----------|--------|
| P62805 | VFLENVIRDAVITYTEHAK              | 2104.10 | 2104.10 | 0.00  | -1.65    | 2.E-28 |
| Q04695 | ATMQNLNDRLASYLDK                 | 1848.88 | 1851.91 | -3.03 | -1639.20 | 3.E-28 |
| P07355 | SALSGHLETVILGLLK                 | 1649.94 | 1649.97 | -0.03 | -17.98   | 3.E-28 |
| P07355 | SALSGHLETVILGLLK                 | 1649.97 | 1649.97 | 0.00  | -1.98    | 3.E-28 |
| P62805 | VFLENVIRDAVITYTEHAK              | 2099.60 | 2104.10 | -4.50 | -2142.44 | 3.E-28 |
| P62805 | VFLENVIRDAVITYTEHAK              | 2101.10 | 2104.10 | -3.00 | -1428.62 | 3.E-28 |
| P62805 | VFLENVIRDAVITYTEHAK              | 2102.60 | 2104.10 | -1.50 | -715.15  | 3.E-28 |
| P62805 | VFLENVIRDAVITYTEHAK              | 2104.05 | 2104.10 | -0.05 | -23.89   | 3.E-28 |
| P14866 | SKPGAAMVEMADGYAVDRAITHLNNNFMFGQK | 3482.65 | 3482.65 | 0.00  | -0.89    | 3.E-28 |
| P04908 | LLGRVTIAQGGVLPNIQAVLLPK          | 2369.44 | 2369.45 | -0.01 | -5.05    | 3.E-28 |
| P04908 | LLGRVTIAQGGVLPNIQAVLLPK          | 2369.95 | 2369.45 | 0.50  | 210.90   | 3.E-28 |
| P62913 | VLEQLTGQTPVFSK                   | 1543.89 | 1545.84 | -1.95 | -1261.70 | 4.E-28 |
| P62913 | VLEQLTGQTPVFSK                   | 1545.84 | 1545.84 | 0.00  | -1.77    | 4.E-28 |
| Q04695 | ATMQNLNDRLASYLDK                 | 1851.91 | 1851.91 | 0.00  | -0.96    | 4.E-28 |
| P41219 | MALDIEIATYRK                     | 1423.75 | 1422.75 | 1.00  | 704.01   | 4.E-28 |

|        |                                                                    |         |         |        |          |        |
|--------|--------------------------------------------------------------------|---------|---------|--------|----------|--------|
| P62805 | TVTAMDVVYALK                                                       | 1310.67 | 1309.70 | 0.97   | 741.11   | 4.E-28 |
| P62318 | IRFLILPDMLK                                                        | 1357.82 | 1357.82 | 0.00   | -0.69    | 4.E-28 |
| P04908 | LLGRVTIAQGGVLPNIQAVLLPK                                            | 2369.39 | 2369.45 | -0.06  | -24.93   | 4.E-28 |
| P60709 | YPIE(317)HGIVTNWDDMEK                                              | 1956.08 | 1959.90 | -3.82  | -1950.88 | 4.E-28 |
| A2BDF6 | STELLIRKLPFQRLVREIAQDFKTDLRFQSSAVMALQEASEAYL<br>VGLFEDTNLCAIHAHAK  | 6898.52 | 6722.54 | 175.98 | 25509.60 | 4.E-28 |
| P62805 | TVTAMDVVYALK                                                       | 1312.70 | 1309.70 | 3.00   | 2281.99  | 5.E-28 |
| P60709 | YPIE(317)HGIVTNWDDMEK                                              | 1959.87 | 1959.90 | -0.03  | -13.36   | 5.E-28 |
| P02545 | EGDLIAAQARLK                                                       | 1283.70 | 1283.72 | -0.02  | -13.18   | 6.E-28 |
| P02545 | EGDLIAAQARLK                                                       | 1283.72 | 1283.72 | 0.00   | -1.49    | 6.E-28 |
| P02545 | EGDLIAAQARLK                                                       | 1285.67 | 1283.72 | 1.95   | 1514.38  | 6.E-28 |
| P0C0S8 | TRIIPRHLQLAIRNDEELNK                                               | 2429.34 | 2428.37 | 0.97   | 400.59   | 6.E-28 |
| P04083 | ALTGHLEEVVLALLK                                                    | 1604.95 | 1604.95 | 0.00   | -1.24    | 6.E-28 |
| O00148 | GLAITFVSDENDAK                                                     | 1478.73 | 1478.73 | 0.00   | -1.46    | 6.E-28 |
| P05387 | LASVPAGGAVAVSAAPGSAAPAAGSAPAAAEEKKDEKKEE(37<br>)SEE(37)SDDDMGFGLFD | 5364.34 | 5364.36 | -0.02  | -3.28    | 7.E-28 |
| P60709 | YPIE(317)HGIVTNWDDMEK                                              | 1959.90 | 1959.90 | 0.00   | -1.57    | 7.E-28 |

|        |                          |         |         |       |         |        |
|--------|--------------------------|---------|---------|-------|---------|--------|
| P0C0S8 | TRIIPRHLQLAIRNDEELNK     | 2429.34 | 2428.37 | 0.97  | 400.88  | 7.E-28 |
| P33778 | RSTITSREIQTAVRLLLLPGELAK | 2551.40 | 2551.48 | -0.08 | -31.84  | 7.E-28 |
| P33778 | RSTITSREIQTAVRLLLLPGELAK | 2551.47 | 2551.48 | -0.01 | -3.15   | 7.E-28 |
| P02545 | EGDLIAAQARLK             | 1287.62 | 1283.72 | 3.90  | 3032.32 | 7.E-28 |
| P62805 | TVTAMDVVYALK             | 1314.67 | 1309.70 | 4.97  | 3778.72 | 7.E-28 |
| P05787 | LSELEAALQRAK             | 1327.63 | 1327.75 | -0.12 | -91.47  | 8.E-28 |
| P05787 | LSELEAALQRAK             | 1327.71 | 1327.75 | -0.04 | -28.80  | 8.E-28 |
| P05787 | LSELEAALQRAK             | 1327.72 | 1327.75 | -0.03 | -24.28  | 8.E-28 |
| P05787 | LSELEAALQRAK             | 1327.75 | 1327.75 | 0.00  | -2.36   | 8.E-28 |
| P05787 | LSELEAALQRAK             | 1327.77 | 1327.75 | 0.02  | 17.52   | 8.E-28 |
| P16403 | ASGPPVSELITK             | 1198.66 | 1197.66 | 1.00  | 837.95  | 8.E-28 |
| P62805 | TVTAMDVVYALK             | 1312.70 | 1309.70 | 3.00  | 2281.99 | 9.E-28 |
| P07355 | AYTNFDAERDALNIETAIK      | 2154.02 | 2154.06 | -0.04 | -16.93  | 9.E-28 |
| P62805 | TVTAMDVVYALK             | 1309.70 | 1309.70 | 0.00  | -2.41   | 9.E-28 |
| P62805 | TVTAMDVVYALK             | 1309.74 | 1309.70 | 0.04  | 31.87   | 9.E-28 |

|        |                                                                                     |         |         |       |         |        |
|--------|-------------------------------------------------------------------------------------|---------|---------|-------|---------|--------|
| P62805 | TVTAMDVVYALK                                                                        | 1309.75 | 1309.70 | 0.05  | 38.44   | 9.E-28 |
| P0C0S8 | TRIIPRHLQLAIRNDEELNK                                                                | 2428.37 | 2428.37 | 0.00  | -0.39   | 9.E-28 |
| P62805 | TVTAMDVVYALK                                                                        | 1310.67 | 1309.70 | 0.97  | 740.96  | 1.E-27 |
| P07355 | AYTNFDAERDALNIETAIK                                                                 | 2154.06 | 2154.06 | 0.00  | -1.61   | 1.E-27 |
| P0C0S8 | TRIIPRHLQLAIRNDEELNK                                                                | 2428.37 | 2428.37 | 0.00  | -1.74   | 1.E-27 |
| P62805 | TVTAMDVVYALK                                                                        | 1314.67 | 1309.70 | 4.97  | 3779.33 | 1.E-27 |
| P62805 | TVTAMDVVYALK                                                                        | 1309.65 | 1309.70 | -0.05 | -41.66  | 1.E-27 |
| P62805 | TVTAMDVVYALK                                                                        | 1309.65 | 1309.70 | -0.05 | -37.46  | 1.E-27 |
| P62805 | TVTAMDVVYALK                                                                        | 1309.67 | 1309.70 | -0.03 | -23.41  | 1.E-27 |
| A5PLR1 | STELLIRKLPFQRLVREIAQDFKTDLRFQSSAVMALQEACEAY<br>LVGLFEDTNLCAIHAKRVTIMPKDIQLARRIRGERA | 9098.93 | 9098.88 | 0.05  | 6.03    | 1.E-27 |
| Q15149 | AVTGYRDPYTGQSVSLFQALKK                                                              | 2437.21 | 2428.28 | 8.93  | 3664.64 | 2.E-27 |
| P07355 | WISIMTERSVPHLQK                                                                     | 1823.93 | 1823.97 | -0.04 | -19.52  | 2.E-27 |
| P07355 | WISIMTERSVPHLQK                                                                     | 1823.97 | 1823.97 | 0.00  | -1.81   | 2.E-27 |
| P62805 | TVTAMDVVYALK                                                                        | 1309.68 | 1309.70 | -0.02 | -15.54  | 2.E-27 |
| P62805 | TVTAMDVVYALK                                                                        | 1309.70 | 1309.70 | 0.00  | -2.33   | 2.E-27 |

|        |                                                                                     |         |         |       |          |        |
|--------|-------------------------------------------------------------------------------------|---------|---------|-------|----------|--------|
| Q15046 | (41)AAVQAAEVKVDGSEPK                                                                | 1639.84 | 1639.84 | 0.00  | 0.91     | 2.E-27 |
| P05204 | VKDEPQRRSARLSAKPAPPKPEPKPK                                                          | 2906.65 | 2906.66 | -0.01 | -1.75    | 2.E-27 |
| Q71UI9 | RITPRHLQLAIRGDEELDSLIIK                                                             | 2572.44 | 2572.44 | 0.00  | -1.77    | 2.E-27 |
| P08758 | (41)AQVLRGTVTDFPGFDERADAETLRK                                                       | 2833.43 | 2833.44 | -0.01 | -2.27    | 2.E-27 |
| P62805 | TVTAMDVVYALK                                                                        | 1309.68 | 1309.70 | -0.02 | -15.16   | 2.E-27 |
| P62805 | TVTAMDVVYALK                                                                        | 1309.70 | 1309.70 | 0.00  | -0.73    | 2.E-27 |
| P62805 | TVTAMDVVYALK                                                                        | 1309.66 | 1309.70 | -0.04 | -33.87   | 2.E-27 |
| P62805 | TVTAMDVVYALK                                                                        | 1309.67 | 1309.70 | -0.03 | -24.40   | 2.E-27 |
| P62906 | KYDAFLASESLIK                                                                       | 1483.79 | 1483.79 | 0.00  | -1.29    | 2.E-27 |
| P16403 | (51)SETAPAAPAAAPPAEK                                                                | 1517.84 | 1519.75 | -1.91 | -1259.31 | 2.E-27 |
| P16403 | (51)SETAPAAPAAAPPAEK                                                                | 1519.73 | 1519.75 | -0.02 | -16.34   | 2.E-27 |
| P16403 | (51)SETAPAAPAAAPPAEK                                                                | 1519.75 | 1519.75 | 0.00  | -2.52    | 2.E-27 |
| Q71UI9 | RITPRHLQLAIRGDEELDSLIIK                                                             | 2572.39 | 2572.44 | -0.05 | -17.99   | 2.E-27 |
| O14979 | EYFGAFGEIENIELPMDTK                                                                 | 2202.01 | 2202.02 | -0.01 | -2.65    | 2.E-27 |
| A5PLR1 | STELLIRKLPFQRLVREIAQDFKTDLRFQSSAVMALQEACEAY<br>LVGLFEDTNLCAIHAKRVTIMPKDIQLARRIRGERA | 9098.89 | 9098.88 | 0.01  | 1.05     | 2.E-27 |

|        |                                                                                     |         |         |       |          |        |
|--------|-------------------------------------------------------------------------------------|---------|---------|-------|----------|--------|
| P07355 | DIISDTSGDFRK                                                                        | 1355.77 | 1352.66 | 3.11  | 2293.92  | 2.E-27 |
| P06748 | TPKTPKGPSSVEDIKAKMQASIEK                                                            | 2569.38 | 2569.38 | 0.00  | 1.40     | 2.E-27 |
| P0C0S5 | SRTTSHGRVGATAAVYSAAILLEYLTAEVLELAGNASK                                              | 3776.96 | 3776.97 | -0.01 | -3.80    | 3.E-27 |
| P62805 | TVTAMDVVYALK                                                                        | 1314.67 | 1309.70 | 4.97  | 3779.78  | 3.E-27 |
| P06748 | VKLAADEDDEDDDEEDDEDDDDDFDDEEAEEKAPVK                                                | 4344.50 | 4344.61 | -0.11 | -26.33   | 3.E-27 |
| P06748 | VKLAADEDDEDDDEEDDEDDDDDFDDEEAEEKAPVK                                                | 4344.62 | 4344.61 | 0.01  | 1.41     | 3.E-27 |
| P36578 | AFRNIPGITLLNVSK                                                                     | 1641.96 | 1641.96 | 0.00  | -1.64    | 3.E-27 |
| P36578 | AFRNIPGITLLNVSK                                                                     | 1645.87 | 1641.96 | 3.91  | 2377.95  | 3.E-27 |
| P07355 | SYSPYDMLESIRK                                                                       | 1587.76 | 1587.76 | 0.00  | -2.32    | 4.E-27 |
| P07355 | SYSPYDMLESIRK                                                                       | 1588.74 | 1587.76 | 0.98  | 613.89   | 4.E-27 |
| P61978 | IDEPLEGSEDRIITITGTQDQIQNAQYLLQNSVK                                                  | 3828.84 | 3828.94 | -0.10 | -27.00   | 4.E-27 |
| P61978 | IDEPLEGSEDRIITITGTQDQIQNAQYLLQNSVK                                                  | 3828.92 | 3828.94 | -0.02 | -4.49    | 4.E-27 |
| P07355 | DIISDTSGDFRK                                                                        | 1352.66 | 1352.66 | 0.00  | -0.21    | 4.E-27 |
| A2BDF6 | STELLIRKLPFQRLVREIAQDFKTDLRFQSSAVMALQEASEAYL<br>VGLFEDTNLCAIHAKRVTIMPKDIQLARRIRGERA | 9082.87 | 9082.91 | -0.04 | -4.73    | 4.E-27 |
| P08670 | ILLAELEQLKGQGK                                                                      | 1535.88 | 1538.90 | -3.02 | -1968.61 | 5.E-27 |

|        |                                 |         |         |       |          |        |
|--------|---------------------------------|---------|---------|-------|----------|--------|
| P07355 | GRRRAEDGSVIDYELIDQDARDLYDAGVK   | 3138.47 | 3138.52 | -0.05 | -16.22   | 5.E-27 |
| P07355 | GRRRAEDGSVIDYELIDQDARDLYDAGVK   | 3138.52 | 3138.52 | 0.00  | 0.06     | 5.E-27 |
| O95777 | (52)TSALENYINRTVAVITSDGRMIVGTLK | 2963.58 | 2963.58 | 0.00  | -1.66    | 5.E-27 |
| P26599 | HQNVQLPREGQEDQGLTK              | 2076.03 | 2076.03 | 0.00  | -1.64    | 6.E-27 |
| P08670 | ILLAELEQLKGQGK                  | 1538.88 | 1538.90 | -0.02 | -15.11   | 6.E-27 |
| P08670 | ILLAELEQLKGQGK                  | 1538.90 | 1538.90 | 0.00  | 0.35     | 6.E-27 |
| P08670 | ILLAELEQLKGQGK                  | 1543.83 | 1538.90 | 4.93  | 3190.99  | 6.E-27 |
| Q12906 | YELISETGGSHDK                   | 1431.71 | 1434.66 | -2.95 | -2063.03 | 7.E-27 |
| Q12906 | YELISETGGSHDK                   | 1434.64 | 1434.66 | -0.02 | -16.43   | 7.E-27 |
| Q12906 | YELISETGGSHDK                   | 1434.66 | 1434.66 | 0.00  | -1.23    | 7.E-27 |
| P33778 | RSTITSREIQTAVRLLLLPGELAK        | 2551.47 | 2551.48 | -0.01 | -3.58    | 7.E-27 |
| Q13185 | WKDSDEADLVLAK                   | 1488.75 | 1488.75 | 0.00  | -0.73    | 7.E-27 |
| P62805 | TVTAMDVVYALK                    | 1309.68 | 1309.70 | -0.02 | -14.55   | 7.E-27 |
| P62805 | TVTAMDVVYALK                    | 1309.70 | 1309.70 | 0.00  | -0.58    | 7.E-27 |
| P62805 | TVTAMDVVYALK                    | 1312.70 | 1309.70 | 3.00  | 2283.43  | 7.E-27 |



|        |                                                                                     |         |         |       |         |        |
|--------|-------------------------------------------------------------------------------------|---------|---------|-------|---------|--------|
| P06748 | LAADEDDDDDEEDDDDDDDDFDDEEAEEKAPVKKSIRD<br>TPAK                                      | 5114.03 | 5114.02 | 0.01  | 1.35    | 8.E-27 |
| A5PLR1 | STELLIRKLPFQRLVREIAQDFKTDLRFQSSAVMALQEACEAY<br>LVGLFEDTNLCAIHAKRVTIMPKDIQLARRIRGERA | 9096.92 | 9098.88 | -1.96 | -215.25 | 9.E-27 |
| P07355 | GRRRAEDGSVIDYELIDQDARDLYDAGVK                                                       | 3138.45 | 3138.52 | -0.07 | -23.30  | 9.E-27 |
| P07355 | GRRRAEDGSVIDYELIDQDARDLYDAGVK                                                       | 3138.52 | 3138.52 | 0.00  | -1.28   | 9.E-27 |
| P07355 | GRRRAEDGSVIDYELIDQDARDLYDAGVK                                                       | 3142.60 | 3138.52 | 4.08  | 1299.78 | 9.E-27 |
| Q12906 | YELISETGGSHDK                                                                       | 1438.77 | 1434.66 | 4.11  | 2860.02 | 1.E-26 |
| P62805 | TVTAMDVVYALK                                                                        | 1309.67 | 1309.70 | -0.03 | -26.38  | 1.E-26 |
| P62805 | TVTAMDVVYALK                                                                        | 1314.67 | 1309.70 | 4.97  | 3780.39 | 1.E-26 |
| P22626 | SGNFGGSRNMGGPYGGGNYGPGGSGGSGGYGGRSRY                                                | 3357.44 | 3357.44 | 0.00  | -0.15   | 1.E-26 |
| Q04695 | EPVTTRQVRTIVEEVQDGK                                                                 | 2183.12 | 2183.15 | -0.03 | -13.68  | 1.E-26 |
| Q04695 | EPVTTRQVRTIVEEVQDGK                                                                 | 2183.15 | 2183.15 | 0.00  | -0.72   | 1.E-26 |
| A5PLR1 | STELLIRKLPFQRLVREIAQDFKTDLRFQSSAVMALQEACEAY<br>LVGLFEDTNLCAIHAKRVTIMPKDIQLARRIRGERA | 9098.87 | 9098.88 | -0.01 | -0.96   | 1.E-26 |
| A5PLR1 | STELLIRKLPFQRLVREIAQDFKTDLRFQSSAVMALQEACEAY<br>LVGLFEDTNLCAIHAKRVTIMPKDIQLARRIRGERA | 9099.65 | 9098.88 | 0.77  | 84.15   | 1.E-26 |
| Q71UI9 | ATIAGGGVIPHIHK                                                                      | 1369.76 | 1369.78 | -0.02 | -15.24  | 1.E-26 |
| Q71UI9 | ATIAGGGVIPHIHK                                                                      | 1369.78 | 1369.78 | 0.00  | -0.71   | 1.E-26 |

|        |                                      |         |         |       |         |        |
|--------|--------------------------------------|---------|---------|-------|---------|--------|
| Q04695 | (52)TTSIRQFTSSSSIK                   | 1583.82 | 1583.82 | 0.00  | -2.04   | 1.E-26 |
| Q04695 | EPVTTRQVRTIVEEVQDGK                  | 2183.15 | 2183.15 | 0.00  | -0.58   | 1.E-26 |
| Q04695 | EPVTTRQVRTIVEEVQDGK                  | 2184.12 | 2183.15 | 0.97  | 443.99  | 1.E-26 |
| P33778 | RSTITSREIQTAVRLLLLPGELAK             | 2551.47 | 2551.48 | -0.01 | -3.58   | 1.E-26 |
| P22626 | SGNFGGSRNMGGPYGGGNYGPGGSGGSGGYGGRSRY | 3357.37 | 3357.44 | -0.07 | -21.74  | 1.E-26 |
| P02545 | SNEDQSMGNWQIK                        | 1535.67 | 1535.67 | 0.00  | -1.27   | 1.E-26 |
| P07355 | SALSGHLETVILGLLK                     | 1649.94 | 1649.97 | -0.03 | -17.98  | 2.E-26 |
| P07355 | SALSGHLETVILGLLK                     | 1649.97 | 1649.97 | 0.00  | -1.98   | 2.E-26 |
| Q04695 | VRALEEANTELEVK                       | 1604.85 | 1599.85 | 5.00  | 3113.47 | 2.E-26 |
| P09651 | RGFAFVTFFDDHDSVDK                    | 1854.85 | 1854.85 | 0.00  | -1.42   | 2.E-26 |
| P46777 | HIMGQNVADYMRYLMEEDEDAYKK             | 2948.30 | 2948.31 | -0.01 | -2.03   | 2.E-26 |
| P22626 | SGNFGGSRNMGGPYGGGNYGPGGSGGSGGYGGRSRY | 3357.31 | 3357.44 | -0.13 | -37.92  | 2.E-26 |
| P0C0S8 | TRIIPRHLQLAIRNDEELNK                 | 2428.34 | 2428.37 | -0.03 | -12.49  | 2.E-26 |
| P0C0S8 | TRIIPRHLQLAIRNDEELNK                 | 2428.37 | 2428.37 | 0.00  | -0.34   | 2.E-26 |
| Q86V81 | LLVSNLDFGVSDADIQELFAEFGTLKK          | 2968.54 | 2968.54 | 0.00  | -1.11   | 2.E-26 |

|        |                                                          |         |         |       |         |        |
|--------|----------------------------------------------------------|---------|---------|-------|---------|--------|
| P0C0S8 | TRIIPRHLQLAIRNDEELNK                                     | 2428.36 | 2428.37 | -0.01 | -3.76   | 2.E-26 |
| P16403 | KAGGTPRKASGPPVSELITK                                     | 1993.13 | 1993.13 | 0.00  | 1.57    | 2.E-26 |
| P0C0S8 | VTIAQGGVLPNIQAVLLPK                                      | 1930.21 | 1930.16 | 0.05  | 24.82   | 2.E-26 |
| P0C0S8 | TRIIPRHLQLAIRNDEELNK                                     | 2428.33 | 2428.37 | -0.04 | -18.26  | 2.E-26 |
| P09651 | RGFAFVTFDDHDSVDK                                         | 1854.81 | 1854.85 | -0.04 | -20.07  | 2.E-26 |
| P09651 | RGFAFVTFDDHDSVDK                                         | 1854.85 | 1854.85 | 0.00  | -2.01   | 2.E-26 |
| P52272 | (41)AAGVEAAAEEVAATEIKMEEESGAPGVPSGNGAPGPKGE<br>GERPAQNEK | 4585.16 | 4586.18 | -1.02 | -223.03 | 2.E-26 |
| P52272 | (41)AAGVEAAAEEVAATEIKMEEESGAPGVPSGNGAPGPKGE<br>GERPAQNEK | 4587.16 | 4586.18 | 0.98  | 213.77  | 2.E-26 |
| Q04695 | VRALLEEANTELEVK                                          | 1599.82 | 1599.85 | -0.03 | -17.79  | 2.E-26 |
| Q04695 | VRALLEEANTELEVK                                          | 1599.85 | 1599.85 | 0.00  | -1.10   | 2.E-26 |
| Q04695 | VRALLEEANTELEVK                                          | 1603.86 | 1599.85 | 4.01  | 2500.12 | 2.E-26 |
| Q04695 | VRALLEEANTELEVK                                          | 1603.86 | 1599.85 | 4.01  | 2500.12 | 2.E-26 |
| P42766 | SIARVLTVINQTQK                                           | 1569.92 | 1569.92 | 0.00  | -1.35   | 2.E-26 |
| O14979 | EYFGAFGEIENIELPMDTK                                      | 2201.97 | 2202.02 | -0.05 | -22.86  | 2.E-26 |
| O14979 | EYFGAFGEIENIELPMDTK                                      | 2202.01 | 2202.02 | -0.01 | -3.15   | 2.E-26 |

|        |                                  |         |         |       |          |        |
|--------|----------------------------------|---------|---------|-------|----------|--------|
| P22626 | LFIGGLSFETTEESLRNYEQWGK          | 2866.37 | 2866.38 | -0.01 | -2.25    | 2.E-26 |
| Q96A72 | IGSLIDVNQSKDPEGLRVFYLVQDLK       | 3108.65 | 3108.65 | 0.00  | -1.38    | 2.E-26 |
| P02545 | SNEDQSMGNWQIK                    | 1531.75 | 1535.67 | -3.92 | -2557.90 | 2.E-26 |
| Q12905 | RNQLAPNSAEQASILSLVTK             | 2257.17 | 2254.19 | 2.98  | 1322.23  | 2.E-26 |
| P26373 | STESLQANVQRLK                    | 1472.79 | 1472.79 | 0.00  | -1.35    | 3.E-26 |
| P0C0S8 | VTIAQGGVLPNIQAVLLPK              | 1930.12 | 1930.16 | -0.04 | -22.69   | 3.E-26 |
| P0C0S8 | VTIAQGGVLPNIQAVLLPK              | 1930.15 | 1930.16 | -0.01 | -3.62    | 3.E-26 |
| P62736 | AGFAGDDAPRAVFPSIVGRPRHQGVMVGMGQK | 3307.60 | 3307.68 | -0.08 | -24.77   | 3.E-26 |
| P62736 | AGFAGDDAPRAVFPSIVGRPRHQGVMVGMGQK | 3307.68 | 3307.68 | 0.00  | -0.88    | 3.E-26 |
| Q12905 | RNQLAPNSAEQASILSLVTK             | 2254.15 | 2254.19 | -0.04 | -16.94   | 3.E-26 |
| Q12905 | RNQLAPNSAEQASILSLVTK             | 2254.19 | 2254.19 | 0.00  | 1.20     | 3.E-26 |
| P05388 | AIRGHLENNPALEK                   | 1559.80 | 1560.84 | -1.04 | -666.37  | 3.E-26 |
| P05388 | AIRGHLENNPALEK                   | 1560.84 | 1560.84 | 0.00  | 0.12     | 3.E-26 |
| Q8WVK2 | KVDGSVNAYAINVSQK                 | 1691.87 | 1691.88 | -0.01 | -7.76    | 3.E-26 |
| P10412 | (51)SETAPAAPAAPAPAEKTPVK         | 1945.02 | 1945.02 | 0.00  | 0.91     | 3.E-26 |

|        |                                        |         |         |       |          |        |
|--------|----------------------------------------|---------|---------|-------|----------|--------|
| P42766 | SIARVLTVINQTQK                         | 1569.92 | 1569.92 | 0.00  | -2.56    | 3.E-26 |
| P09651 | RGFAFVTFFDDHDSVDK                      | 1850.85 | 1854.85 | -4.00 | -2160.16 | 4.E-26 |
| P39019 | DVNQQEFVRALAAFLK                       | 1847.99 | 1847.99 | 0.00  | -2.41    | 4.E-26 |
| P31949 | TEFLSFMNTELAFTK                        | 1847.99 | 1848.90 | -0.91 | -492.03  | 4.E-26 |
| P31949 | TEFLSFMNTELAFTK                        | 1848.90 | 1848.90 | 0.00  | -1.28    | 4.E-26 |
| P30050 | EILGTAQSVGCNVDGRHPHDIIDDINSGAVECPAS    | 3588.66 | 3588.66 | 0.00  | -0.96    | 4.E-26 |
| P25705 | AVDSLVPPIGRGQRELIIGDRQTGK              | 2577.44 | 2577.44 | 0.00  | -1.68    | 5.E-26 |
| P16403 | KAGGTPRKASGPPVSELITK                   | 1993.13 | 1993.13 | 0.00  | 1.42     | 5.E-26 |
| Q00839 | LNTLLQRAPQCLGK                         | 1553.87 | 1553.87 | 0.00  | -1.20    | 5.E-26 |
| P84090 | (51)SHTILLVQPTK                        | 1277.71 | 1277.73 | -0.02 | -13.90   | 5.E-26 |
| P62750 | AYVRLAPDYDALDVANKIGII                  | 2289.23 | 2289.24 | -0.01 | -3.20    | 5.E-26 |
| P0C0S5 | SRTTSHGRVGGATAAVYSAAILEYLTAEVLELAGNASK | 3776.96 | 3776.97 | -0.01 | -1.57    | 5.E-26 |
| P22626 | IDTIEIITDRQSGK                         | 1587.85 | 1587.85 | 0.00  | -1.12    | 5.E-26 |
| P02545 | EGDLIAAQARLK                           | 1283.72 | 1283.72 | 0.00  | -1.18    | 5.E-26 |
| P02545 | EGDLIAAQARLK                           | 1285.67 | 1283.72 | 1.95  | 1513.76  | 5.E-26 |

|        |                            |         |         |       |         |        |
|--------|----------------------------|---------|---------|-------|---------|--------|
| P07910 | LKGDDLQAIKK                | 1231.73 | 1227.72 | 4.01  | 3256.68 | 5.E-26 |
| P08708 | LLDFGSLSNLQVTQPTVGMNFK     | 2408.23 | 2408.24 | -0.01 | -3.88   | 6.E-26 |
| P84090 | (51)SHTILLVQPTK            | 1277.73 | 1277.73 | 0.00  | -1.61   | 6.E-26 |
| P22626 | IDTIEIITDRQSGK             | 1587.82 | 1587.85 | -0.03 | -16.67  | 6.E-26 |
| Q00839 | LNTLLQRAPQCLGK             | 1554.85 | 1553.87 | 0.98  | 628.25  | 6.E-26 |
| P10412 | (51)SETAPAAPAAPAEK(38)TPVK | 2024.98 | 2024.98 | 0.00  | -2.04   | 6.E-26 |
| P04083 | ALTGHLEEVVLALLK            | 1604.95 | 1604.95 | 0.00  | -2.12   | 6.E-26 |
| Q04695 | (52)TTSIRQFTSSSSIK         | 1583.82 | 1583.82 | 0.00  | -1.66   | 7.E-26 |
| P84090 | (51)SHTILLVQPTK            | 1277.70 | 1277.73 | -0.03 | -23.21  | 7.E-26 |
| P60709 | YPIE(317)HGIVTNWDDMEK      | 1959.90 | 1959.90 | 0.00  | -1.83   | 8.E-26 |
| Q04695 | (52)TTSIRQFTSSSSIK         | 1584.80 | 1583.82 | 0.98  | 615.33  | 8.E-26 |
| Q04695 | VRALEEANTELEVK             | 1602.82 | 1599.85 | 2.97  | 1850.27 | 8.E-26 |
| P08729 | LLETKWTLLEQEK              | 1628.91 | 1628.91 | 0.00  | -0.82   | 8.E-26 |
| P08729 | LLETKWTLLEQEK              | 1631.86 | 1628.91 | 2.95  | 1810.11 | 8.E-26 |
| O14979 | LLESRYHQIGSGK              | 1486.79 | 1486.79 | 0.00  | -0.27   | 9.E-26 |

|        |                                  |         |         |       |          |        |
|--------|----------------------------------|---------|---------|-------|----------|--------|
| Q71UI9 | ATIAGGGVIPHIHK                   | 1369.75 | 1369.78 | -0.03 | -25.24   | 9.E-26 |
| Q71UI9 | ATIAGGGVIPHIHK                   | 1369.76 | 1369.78 | -0.02 | -15.24   | 9.E-26 |
| Q71UI9 | ATIAGGGVIPHIHK                   | 1369.78 | 1369.78 | 0.00  | -2.54    | 9.E-26 |
| P62736 | AGFAGDDAPRAVFPISVGRPRHQGVMVGMGQK | 3307.67 | 3307.68 | -0.01 | -2.12    | 1.E-25 |
| P62910 | AIVERAAQLAIRVTNPNARLRSEENE       | 2919.55 | 2919.56 | -0.01 | -1.75    | 1.E-25 |
| Q04695 | VRALLEEANTELEVK                  | 1599.82 | 1599.85 | -0.03 | -17.92   | 1.E-25 |
| Q04695 | VRALLEEANTELEVK                  | 1599.85 | 1599.85 | 0.00  | -1.48    | 1.E-25 |
| Q04695 | VRALLEEANTELEVK                  | 1600.70 | 1599.85 | 0.85  | 531.92   | 1.E-25 |
| P16403 | ASGPPVSELITK                     | 1198.66 | 1197.66 | 1.00  | 836.12   | 1.E-25 |
| Q15233 | GIVEFSGKPAARK                    | 1358.77 | 1358.77 | 0.00  | -1.54    | 1.E-25 |
| P0C0S8 | VTIAQGGVLPNIQAVLLPK              | 1930.15 | 1930.16 | -0.01 | -2.74    | 1.E-25 |
| P22626 | IDTIEIITDRQSGK                   | 1583.82 | 1587.85 | -4.03 | -2546.81 | 1.E-25 |
| P51991 | GGSFGRSSGSPYGGGYSGGGSGGYGSRRF    | 2831.24 | 2831.24 | 0.00  | 1.35     | 1.E-25 |
| P61513 | TVAGGAWTYNTTSAVTVK               | 1825.92 | 1825.92 | 0.00  | -1.92    | 1.E-25 |
| P60903 | PSQMEHAMETMMFTFHK                | 2081.88 | 2081.88 | 0.00  | -2.09    | 2.E-25 |

|        |                                                                                     |         |         |       |          |        |
|--------|-------------------------------------------------------------------------------------|---------|---------|-------|----------|--------|
| P22626 | IDTIEITDRQSGK                                                                       | 1587.85 | 1587.85 | 0.00  | -2.19    | 2.E-25 |
| P22626 | IDTIEITDRQSGK                                                                       | 1589.83 | 1587.85 | 1.98  | 1243.49  | 2.E-25 |
| P62851 | IRGSLARAALQELLSK                                                                    | 1725.03 | 1725.03 | 0.00  | -1.26    | 2.E-25 |
| P07910 | LKGDDLQAIKK                                                                         | 1228.71 | 1227.72 | 0.99  | 803.16   | 2.E-25 |
| P21796 | SRVTQSNFAVGYK                                                                       | 1455.75 | 1455.75 | 0.00  | 0.81     | 2.E-25 |
| P21796 | SRVTQSNFAVGYK                                                                       | 1455.83 | 1455.75 | 0.08  | 57.48    | 2.E-25 |
| A5PLR1 | STELLIRKLPFQRLVREIAQDFKTDLRFQSSAVMALQEACEAY<br>LVGLFEDTNLCAIHAKRVTIMPKDIQLARRIRGERA | 9096.92 | 9098.88 | -1.96 | -215.04  | 2.E-25 |
| Q13185 | WKDSDEADLVLAK                                                                       | 1488.75 | 1488.75 | 0.00  | -1.13    | 2.E-25 |
| P38159 | LFIGGLNTETNEK                                                                       | 1432.62 | 1434.74 | -2.12 | -1477.95 | 2.E-25 |
| P38159 | LFIGGLNTETNEK                                                                       | 1434.74 | 1434.74 | 0.00  | -0.72    | 2.E-25 |
| P38159 | LFIGGLNTETNEK                                                                       | 1435.72 | 1434.74 | 0.98  | 680.54   | 2.E-25 |
| P62805 | TVTAMDVVYALK                                                                        | 1311.68 | 1309.70 | 1.98  | 1508.03  | 2.E-25 |
| P62805 | TVTAMDVVYALK                                                                        | 1312.69 | 1309.70 | 2.99  | 2281.46  | 2.E-25 |
| P07910 | LKGDDLQAIKK                                                                         | 1227.72 | 1227.72 | 0.00  | -0.78    | 2.E-25 |
| P05386 | KVEAKKEESEESDDDMGFGLFD                                                              | 2504.08 | 2504.09 | -0.01 | -2.97    | 2.E-25 |



|        |                                  |         |         |       |         |        |
|--------|----------------------------------|---------|---------|-------|---------|--------|
| P17096 | RGRGRPRKQPPVSPGTALVGSQKEPSEVPTPK | 3392.88 | 3392.88 | 0.00  | -1.04   | 3.E-25 |
| O75367 | AASADSTTEGTPADGFTVLSTK           | 2126.00 | 2126.00 | 0.00  | -0.75   | 3.E-25 |
| P62805 | TVTAMDVVYALK                     | 1310.75 | 1309.70 | 1.05  | 797.45  | 3.E-25 |
| P38159 | LFIGGLNTETNEK                    | 1434.74 | 1434.74 | 0.00  | -1.35   | 3.E-25 |
| P38159 | LFIGGLNTETNEK                    | 1435.72 | 1434.74 | 0.98  | 680.89  | 3.E-25 |
| P38159 | LFIGGLNTETNEK                    | 1437.75 | 1434.74 | 3.01  | 2092.14 | 3.E-25 |
| P04908 | LLGRVTIAQGGVLPNIQAVLLPK          | 2369.44 | 2369.45 | -0.01 | -2.94   | 3.E-25 |
| P06748 | MSVQPTVSLGGFEITPPVLRK            | 2467.38 | 2467.39 | -0.01 | -3.20   | 3.E-25 |
| P62805 | TVTAMDVVYALK                     | 1309.68 | 1309.70 | -0.02 | -16.46  | 3.E-25 |
| P62805 | TVTAMDVVYALK                     | 1309.70 | 1309.70 | 0.00  | -2.94   | 3.E-25 |
| P62805 | TVTAMDVVYALK                     | 1309.74 | 1309.70 | 0.04  | 33.48   | 3.E-25 |
| P62805 | TVTAMDVVYALK                     | 1309.76 | 1309.70 | 0.06  | 42.56   | 3.E-25 |
| P05787 | KIETRDGKLVSESSDVLPK              | 2100.14 | 2100.14 | 0.00  | -0.53   | 3.E-25 |
| P05787 | KIETRDGKLVSESSDVLPK              | 2101.11 | 2100.14 | 0.97  | 462.28  | 3.E-25 |
| P33778 | RSTITSREIQTAVRLLLPGELAK          | 2551.47 | 2551.48 | -0.01 | -3.26   | 4.E-25 |

|        |                                   |         |         |       |          |        |
|--------|-----------------------------------|---------|---------|-------|----------|--------|
| P63220 | (49)MQNDAGEFVDLYVPRK              | 1922.92 | 1922.92 | 0.00  | -2.47    | 4.E-25 |
| P38919 | EQIYDVYRYLPPATQVVLISATLPHEILEMTNK | 3844.00 | 3844.01 | -0.01 | -3.00    | 4.E-25 |
| P62805 | TVTAMDVVYALK                      | 1309.64 | 1309.70 | -0.06 | -42.65   | 4.E-25 |
| P62805 | TVTAMDVVYALK                      | 1309.66 | 1309.70 | -0.04 | -33.49   | 4.E-25 |
| P62805 | TVTAMDVVYALK                      | 1309.67 | 1309.70 | -0.03 | -25.01   | 4.E-25 |
| P62805 | TVTAMDVVYALK                      | 1314.67 | 1309.70 | 4.97  | 3778.80  | 4.E-25 |
| P61247 | VERADGYEPPVQESV                   | 1673.79 | 1673.79 | 0.00  | 0.57     | 4.E-25 |
| P61247 | VERADGYEPPVQESV                   | 1677.82 | 1673.79 | 4.03  | 2403.03  | 4.E-25 |
| P26599 | HQNVQLPREGQEDQGLTK                | 2076.03 | 2076.03 | 0.00  | -0.77    | 4.E-25 |
| P08865 | LLLAARAIVAIENPADVSVISSRNTGQRAVLK  | 3344.92 | 3344.93 | -0.01 | -1.80    | 4.E-25 |
| Q14103 | IFVGGLSPDTPEEK                    | 1487.75 | 1487.75 | 0.00  | -1.37    | 4.E-25 |
| P07355 | DIISDTSGDFRK                      | 1352.64 | 1352.66 | -0.02 | -14.63   | 4.E-25 |
| P07355 | DIISDTSGDFRK                      | 1352.66 | 1352.66 | 0.00  | 0.38     | 4.E-25 |
| P42766 | SIARVLTVINQTK                     | 1565.86 | 1569.92 | -4.06 | -2593.67 | 5.E-25 |
| Q71UI9 | ATIAGGGVIPHIHK                    | 1373.70 | 1369.78 | 3.92  | 2854.42  | 5.E-25 |

|        |                                      |         |         |       |          |        |
|--------|--------------------------------------|---------|---------|-------|----------|--------|
| P62910 | AIVERAAQLAIRVTNPARNLRSEENE           | 2919.55 | 2919.56 | -0.01 | -1.99    | 5.E-25 |
| P69905 | TYFPHFDLSHGSAQVK                     | 1829.92 | 1832.88 | -2.96 | -1619.23 | 5.E-25 |
| P69905 | TYFPHFDLSHGSAQVK                     | 1832.88 | 1832.88 | 0.00  | -2.16    | 5.E-25 |
| P69905 | TYFPHFDLSHGSAQVK                     | 1836.95 | 1832.88 | 4.07  | 2215.00  | 5.E-25 |
| Q71UI9 | ATIAGGGVIPHIHK                       | 1365.70 | 1369.78 | -4.08 | -2986.28 | 6.E-25 |
| Q71UI9 | ATIAGGGVIPHIHK                       | 1369.78 | 1369.78 | 0.00  | -1.59    | 6.E-25 |
| P41219 | NLQEAEWYK                            | 1308.60 | 1308.60 | 0.00  | -1.69    | 6.E-25 |
| P20674 | EIYPYVIQELRPTLNELGISTPEELGLDKV       | 3427.80 | 3427.81 | -0.01 | -2.71    | 7.E-25 |
| P39019 | DVNQQEFVRALAAFLK                     | 1847.99 | 1847.99 | 0.00  | -1.32    | 7.E-25 |
| P39019 | DVNQQEFVRALAAFLK                     | 1848.89 | 1847.99 | 0.90  | 488.92   | 7.E-25 |
| P22626 | RSRGFGFVTFSSMAEVDAAAMAARPHSIDGRVVEPK | 3777.87 | 3777.88 | -0.01 | -1.85    | 8.E-25 |
| Q16695 | QLAT(55)KVARKSAPATGGVK               | 1824.06 | 1824.06 | 0.00  | -0.84    | 8.E-25 |
| P05204 | VKDEPQRRSARLSAKPAPPKPEPKPK           | 2906.65 | 2906.66 | -0.01 | -1.78    | 8.E-25 |
| P33778 | AMGIMNSFVNDIFERIAGEASRLAHYNK         | 3153.54 | 3153.55 | -0.01 | -2.53    | 8.E-25 |
| P42766 | SIARVLTVINQTQK                       | 1569.92 | 1569.92 | 0.00  | -1.16    | 9.E-25 |

|        |                                                               |         |         |       |          |        |
|--------|---------------------------------------------------------------|---------|---------|-------|----------|--------|
| Q8IUE6 | TRIIPRHLQLAVRNDEELNK                                          | 2414.35 | 2414.35 | 0.00  | -0.91    | 9.E-25 |
| Q00839 | EKPYFPIPEEYTFIQNVPLEDRVRGPK                                   | 3260.68 | 3260.69 | -0.01 | -2.46    | 9.E-25 |
| P07355 | SALSGHLETVILGLLK                                              | 1646.58 | 1649.97 | -3.39 | -2057.63 | 1.E-24 |
| P07355 | SALSGHLETVILGLLK                                              | 1649.97 | 1649.97 | 0.00  | -2.22    | 1.E-24 |
| P07355 | SALSGHLETVILGLLK                                              | 1650.94 | 1649.97 | 0.97  | 588.78   | 1.E-24 |
| P16401 | (51)SETAPAETATPAPVEK                                          | 1639.79 | 1639.79 | 0.00  | -1.89    | 1.E-24 |
| Q9Y3U8 | ALRYPMAVGLNK                                                  | 1336.69 | 1331.74 | 4.95  | 3701.58  | 1.E-24 |
| Q96QV6 | LLGGVTIAQGGVLPNIQAVLLPK                                       | 2270.31 | 2270.37 | -0.06 | -26.35   | 1.E-24 |
| Q96QV6 | LLGGVTIAQGGVLPNIQAVLLPK                                       | 2270.36 | 2270.37 | -0.01 | -4.55    | 1.E-24 |
| O75367 | AASADSTTEGTPADGFTVLSTK                                        | 2125.99 | 2126.00 | -0.01 | -2.39    | 1.E-24 |
| Q8IUE6 | TRIIPRHLQLAVRNDEELNK                                          | 2418.26 | 2414.35 | 3.91  | 1616.13  | 1.E-24 |
| P33778 | AMGIMNSFVNDIFERIAGEASRLAHYNK                                  | 3153.55 | 3153.55 | 0.00  | -0.91    | 1.E-24 |
| P07355 | GRRRAEDGSVIDYELIDQDARDLYDAGVK                                 | 3138.51 | 3138.52 | -0.01 | -2.14    | 1.E-24 |
| P07355 | GRRRAEDGSVIDYELIDQDARDLYDAGVK                                 | 3142.60 | 3138.52 | 4.08  | 1299.81  | 1.E-24 |
| P62304 | VMVQPINLIFRYLQNRSRIQVWLYEQVNMRIEGCIIGFDEYMN<br>LVLDAAEEIHSKTK | 6869.51 | 6869.50 | 0.01  | 1.12     | 1.E-24 |

|        |                                |         |         |       |        |        |
|--------|--------------------------------|---------|---------|-------|--------|--------|
| Q16695 | QLAT(55)KVARKSAPATGGVK         | 1824.02 | 1824.06 | -0.04 | -20.79 | 1.E-24 |
| P0C0S8 | TRIIPRHLQLAIRNDEELNK           | 2428.37 | 2428.37 | 0.00  | -0.14  | 1.E-24 |
| P07355 | LSLEGDHSTPPSAYGSVK             | 1843.89 | 1843.90 | -0.01 | -3.46  | 1.E-24 |
| P20674 | EIYPYVIQELRPTLNELGISTPEELGLDKV | 3427.80 | 3427.81 | -0.01 | -3.67  | 1.E-24 |
| P0C0S8 | TRIIPRHLQLAIRNDEELNK           | 2428.42 | 2428.37 | 0.05  | 21.69  | 1.E-24 |
| P0C0S8 | TRIIPRHLQLAIRNDEELNK           | 2428.44 | 2428.37 | 0.07  | 27.49  | 1.E-24 |
| P0C0S8 | TRIIPRHLQLAIRNDEELNK           | 2428.28 | 2428.37 | -0.09 | -38.03 | 1.E-24 |
| P0C0S8 | TRIIPRHLQLAIRNDEELNK           | 2428.29 | 2428.37 | -0.08 | -32.38 | 1.E-24 |
| P0C0S8 | TRIIPRHLQLAIRNDEELNK           | 2428.33 | 2428.37 | -0.04 | -17.89 | 1.E-24 |
| Q9Y3U8 | ALRYPMAVGLNK                   | 1331.72 | 1331.74 | -0.02 | -14.76 | 1.E-24 |
| Q9Y3U8 | ALRYPMAVGLNK                   | 1331.74 | 1331.74 | 0.00  | -1.17  | 1.E-24 |
| Q9Y3U8 | ALRYPMAVGLNK                   | 1331.83 | 1331.74 | 0.09  | 67.01  | 1.E-24 |
| O14979 | LLESRYHQIGSGK                  | 1486.79 | 1486.79 | 0.00  | -0.61  | 1.E-24 |
| P62805 | RISGLIYEETRGVLK                | 1732.98 | 1732.98 | 0.00  | -1.64  | 1.E-24 |
| Q00839 | LNLLQRAPQCLGK                  | 1553.87 | 1553.87 | 0.00  | -0.69  | 1.E-24 |

|        |                                                                                     |         |         |       |          |        |
|--------|-------------------------------------------------------------------------------------|---------|---------|-------|----------|--------|
| O75367 | NGPLEVAGAAVSAGHGLPAK                                                                | 1814.96 | 1814.96 | 0.00  | -1.78    | 2.E-24 |
| Q02539 | SLVSKGTLVQTK                                                                        | 1256.63 | 1259.74 | -3.11 | -2474.05 | 2.E-24 |
| Q02539 | SLVSKGTLVQTK                                                                        | 1259.74 | 1259.74 | 0.00  | -1.34    | 2.E-24 |
| Q71UI9 | ATIAGGGVIPHIHK                                                                      | 1368.69 | 1369.78 | -1.10 | -800.02  | 2.E-24 |
| Q71UI9 | ATIAGGGVIPHIHK                                                                      | 1369.76 | 1369.78 | -0.02 | -14.87   | 2.E-24 |
| Q71UI9 | ATIAGGGVIPHIHK                                                                      | 1369.78 | 1369.78 | 0.00  | -1.59    | 2.E-24 |
| A5PLR1 | STELLIRKLPFQRLVREIAQDFKTDLRFQSSAVMALQEACEAY<br>LVGLFEDTNLCAIHAKRVTIMPKDIQLARRIRGERA | 9096.92 | 9098.88 | -1.96 | -215.41  | 2.E-24 |
| P07355 | LSLEGDHSTPPSAYGSVK                                                                  | 1847.85 | 1843.90 | 3.95  | 2135.42  | 2.E-24 |
| P16403 | (51)SETAPAAPAAAPPAEK                                                                | 1517.84 | 1519.75 | -1.91 | -1258.38 | 2.E-24 |
| P16403 | (51)SETAPAAPAAAPPAEK                                                                | 1519.73 | 1519.75 | -0.02 | -16.14   | 2.E-24 |
| P16403 | (51)SETAPAAPAAAPPAEK                                                                | 1519.75 | 1519.75 | 0.00  | -2.52    | 2.E-24 |
| P0C0S5 | SRTTSHGRVGATAAVYSAAILEYLTAEVLELAGNASK                                               | 3776.96 | 3776.97 | -0.01 | -1.92    | 2.E-24 |
| P98179 | LFVGGLNFNTDEQALEDHFSSFGPISEVVVK                                                     | 3493.73 | 3493.74 | -0.01 | -2.97    | 2.E-24 |
| O75526 | SRGFVTFESPADAK                                                                      | 1725.81 | 1728.85 | -3.04 | -1760.85 | 2.E-24 |
| O75526 | SRGFVTFESPADAK                                                                      | 1728.85 | 1728.85 | 0.00  | -1.44    | 2.E-24 |

|        |                                                                                                   |         |         |       |         |        |
|--------|---------------------------------------------------------------------------------------------------|---------|---------|-------|---------|--------|
| O75526 | SRGFVTFESPADAK                                                                                    | 1732.98 | 1728.85 | 4.13  | 2384.85 | 2.E-24 |
| Q71UI9 | ATIAGGGVIPHIHK                                                                                    | 1369.76 | 1369.78 | -0.02 | -14.58  | 2.E-24 |
| Q71UI9 | ATIAGGGVIPHIHK                                                                                    | 1369.78 | 1369.78 | 0.00  | -0.64   | 2.E-24 |
| P35659 | KKVERLTMQVSSLQREPFTIAQGK                                                                          | 2773.52 | 2773.53 | -0.01 | -2.28   | 2.E-24 |
| P26373 | STESLQANVQRLK                                                                                     | 1472.79 | 1472.79 | 0.00  | -1.29   | 2.E-24 |
| Q6F113 | SRSSRAGLQFPVGRVHRLLRKGNYAERVGAGAPVYMAAVLE<br>YLTAEILELAGNAARDNKK                                  | 6509.50 | 6509.51 | -0.01 | -0.89   | 3.E-24 |
| Q04695 | ATMQNLNDRLASYLDK                                                                                  | 1854.85 | 1851.91 | 2.94  | 1584.07 | 3.E-24 |
| P22626 | SGNFGGSRNMGGPYGGGNYGPGGSGGSGGYGGRSRY                                                              | 3357.44 | 3357.44 | 0.00  | -0.80   | 3.E-24 |
| P62736 | AGFAGDDAPRAVFPVGRPRHQGMVMGMGQK                                                                    | 3307.61 | 3307.68 | -0.07 | -22.17  | 3.E-24 |
| P62736 | AGFAGDDAPRAVFPVGRPRHQGMVMGMGQK                                                                    | 3307.67 | 3307.68 | -0.01 | -3.42   | 3.E-24 |
| P14866 | RQRQPPLLDGHPAEYGGPHGGYHSHYHDEGYGPPPPHYEG<br>RRMGPPVGGHRRGPSRYGPQYGHPPPPPPPEYGPADS<br>PVLMMYGLDQSK | 9977.75 | 9977.75 | 0.00  | -0.40   | 3.E-24 |
| A5PLR1 | STELLIRKLPFQRLVREIAQDFKTDLRFQSSAVMALQEACEAY<br>LVGLFEDTNLCAIHAKRVTIMPKDIQLARRIRGERA               | 9097.93 | 9098.88 | -0.95 | -104.64 | 4.E-24 |
| O60506 | ALLERTGYTLDVTTGQRK                                                                                | 2021.09 | 2021.09 | 0.00  | -1.55   | 4.E-24 |
| P38159 | LFIGGLNTETNEK                                                                                     | 1434.74 | 1434.74 | 0.00  | -1.42   | 4.E-24 |
| Q08211 | LAQFEPSQRQNQVGVVWSPPPQSNWNPWTSNIDEGPLAF<br>ATPEQISMDLKNELMYQLEQDHDLQAILQERRELLPVK                 | 8867.36 | 8867.37 | -0.01 | -1.34   | 5.E-24 |

|        |                                                     |         |         |       |          |        |
|--------|-----------------------------------------------------|---------|---------|-------|----------|--------|
| Q04695 | ATMQNLNDRASYLDK                                     | 1850.85 | 1851.91 | -1.06 | -571.13  | 5.E-24 |
| Q04695 | ATMQNLNDRASYLDK                                     | 1851.91 | 1851.91 | 0.00  | -1.07    | 5.E-24 |
| P61978 | IILDLISESPIK                                        | 1339.80 | 1339.80 | 0.00  | -1.07    | 5.E-24 |
| P07355 | LSLEGDHSTPPSAYGSVK                                  | 1843.89 | 1843.90 | -0.01 | -3.02    | 5.E-24 |
| Q548L2 | LQEEMLQREEAENTLQSFQRQDVNASLARLDLERKVESLQE<br>EIAFLK | 5560.80 | 5560.81 | -0.01 | -2.30    | 5.E-24 |
| P26447 | ELLTRELPSFLGK                                       | 1501.83 | 1501.85 | -0.02 | -15.91   | 5.E-24 |
| P26447 | ELLTRELPSFLGK                                       | 1501.85 | 1501.85 | 0.00  | -0.33    | 5.E-24 |
| P04083 | GVDEATIIDILTK                                       | 1384.69 | 1386.76 | -2.07 | -1498.08 | 6.E-24 |
| P04083 | GVDEATIIDILTK                                       | 1386.76 | 1386.76 | 0.00  | -1.50    | 6.E-24 |
| Q15233 | LEMEMEAAARHEHQVMLMRQDLMRRQEELRRMEELHNQEV<br>QK      | 5216.50 | 5216.51 | -0.01 | -1.18    | 6.E-24 |
| Q548L2 | LQEEMLQREEAENTLQSFQRQDVNASLARLDLERKVESLQE<br>EIAFLK | 5560.81 | 5560.81 | 0.00  | -0.39    | 6.E-24 |
| P17096 | RGRGRPRKQPPVSPGTALVGSQKEPSEVPTPK                    | 3392.88 | 3392.88 | 0.00  | -1.25    | 6.E-24 |
| Q71UI9 | ATIAGGGVIPHIHK                                      | 1369.75 | 1369.78 | -0.03 | -25.24   | 7.E-24 |
| Q71UI9 | ATIAGGGVIPHIHK                                      | 1369.76 | 1369.78 | -0.02 | -15.24   | 7.E-24 |
| Q71UI9 | ATIAGGGVIPHIHK                                      | 1369.78 | 1369.78 | 0.00  | -2.54    | 7.E-24 |



|        |                                                                                     |         |         |       |         |        |
|--------|-------------------------------------------------------------------------------------|---------|---------|-------|---------|--------|
| P33778 | AMGIMNSFVNDIFERIAGEASRLAHYNK                                                        | 3150.74 | 3153.55 | -2.81 | -891.40 | 8.E-24 |
| P33778 | AMGIMNSFVNDIFERIAGEASRLAHYNK                                                        | 3150.95 | 3153.55 | -2.60 | -825.07 | 8.E-24 |
| P33778 | AMGIMNSFVNDIFERIAGEASRLAHYNK                                                        | 3151.34 | 3153.55 | -2.21 | -701.56 | 8.E-24 |
| Q09666 | ISMPDVDLHLK                                                                         | 1266.64 | 1266.66 | -0.02 | -12.70  | 8.E-24 |
| Q09666 | ISMPDVDLHLK                                                                         | 1266.66 | 1266.66 | 0.00  | -0.46   | 8.E-24 |
| Q09666 | ISMPDVDLHLK                                                                         | 1269.62 | 1266.66 | 2.96  | 2330.78 | 8.E-24 |
| P10412 | (51)SETAPAAPAAPAPAEKTPVK                                                            | 1945.02 | 1945.02 | 0.00  | 1.06    | 8.E-24 |
| P06748 | LAADEDDEDDDEEDDEDDDDDDDFDDEEAEEK                                                    | 3739.21 | 3722.19 | 17.02 | 4550.81 | 8.E-24 |
| P06748 | LAADEDDEDDDEEDDEDDDDDDDFDDEEAEEK                                                    | 3742.12 | 3722.19 | 19.93 | 5326.98 | 8.E-24 |
| P06748 | LAADEDDEDDDEEDDEDDDDDDDFDDEEAEEK                                                    | 3745.16 | 3722.19 | 22.97 | 6134.50 | 8.E-24 |
| P62304 | VMVQPINLIFRYLQNRSRIQVWLYEQVMRIEGCIIGFDEYMN<br>LVLDDAEEIHSKTKSRKQLGRIMLKGDNITLLQSVSN | 9421.92 | 9421.92 | 0.00  | -0.03   | 8.E-24 |
| P25705 | RTGAIVDVPVGEELLGRVVDALGNAIDGK                                                       | 2932.54 | 2932.60 | -0.06 | -20.02  | 8.E-24 |
| P25705 | RTGAIVDVPVGEELLGRVVDALGNAIDGK                                                       | 2932.59 | 2932.60 | -0.01 | -2.25   | 8.E-24 |
| O75526 | SRGFVTFESPADAK                                                                      | 1728.82 | 1728.85 | -0.03 | -17.06  | 9.E-24 |
| O75526 | SRGFVTFESPADAK                                                                      | 1728.85 | 1728.85 | 0.00  | -1.96   | 9.E-24 |

|        |                                     |         |         |       |         |        |
|--------|-------------------------------------|---------|---------|-------|---------|--------|
| P22626 | RSRGFGFVTFSSMAEVDAAMAARPHSIDGRVVEPK | 3777.82 | 3777.88 | -0.06 | -14.77  | 9.E-24 |
| P22626 | RSRGFGFVTFSSMAEVDAAMAARPHSIDGRVVEPK | 3777.89 | 3777.88 | 0.01  | 2.04    | 9.E-24 |
| Q99880 | AMGIMNSFVNDIFERIAEASRLAHYNK         | 3183.55 | 3183.56 | -0.01 | -3.03   | 1.E-23 |
| P51991 | LFIGGLSFETDDSLREHFEK                | 2440.19 | 2440.19 | 0.00  | -1.48   | 1.E-23 |
| P62805 | TVTAMDVVYALK                        | 1310.68 | 1309.70 | 0.98  | 751.32  | 1.E-23 |
| P33778 | AMGIMNSFVNDIFERIAEASRLAHYNK         | 3153.14 | 3153.55 | -0.41 | -128.97 | 1.E-23 |
| P33778 | AMGIMNSFVNDIFERIAEASRLAHYNK         | 3153.51 | 3153.55 | -0.04 | -12.86  | 1.E-23 |
| P33778 | AMGIMNSFVNDIFERIAEASRLAHYNK         | 3153.55 | 3153.55 | 0.00  | 0.04    | 1.E-23 |
| P33778 | AMGIMNSFVNDIFERIAEASRLAHYNK         | 3153.74 | 3153.55 | 0.19  | 60.99   | 1.E-23 |
| P26447 | ELLTRELPSFLGK                       | 1503.75 | 1501.85 | 1.90  | 1263.91 | 1.E-23 |
| P05787 | AQYEDIANRSRAEAESMYQIK               | 2472.17 | 2472.17 | 0.00  | 0.36    | 1.E-23 |
| P33778 | AMGIMNSFVNDIFERIAEASRLAHYNK         | 3153.95 | 3153.55 | 0.40  | 125.32  | 1.E-23 |
| P33778 | AMGIMNSFVNDIFERIAEASRLAHYNK         | 3154.35 | 3153.55 | 0.80  | 252.04  | 1.E-23 |
| Q71UI9 | RITPRHLQLAIRGDEELDSLIIK             | 2572.43 | 2572.44 | -0.01 | -2.44   | 1.E-23 |
| P39023 | SFPKDDPSKPVHLTAFLGYK                | 2246.17 | 2246.17 | 0.00  | -0.94   | 2.E-23 |

|        |                                                      |         |         |       |          |        |
|--------|------------------------------------------------------|---------|---------|-------|----------|--------|
| P05783 | YWSQQIEESTTVVTTQSAEVGAAETTLTELRRTVQSLEIDLDS<br>MRNLK | 5426.71 | 5426.72 | -0.01 | -2.62    | 2.E-23 |
| P0C0S8 | VTIAQGGVLPNIQAVLLPK                                  | 1930.21 | 1930.16 | 0.05  | 24.88    | 2.E-23 |
| P06748 | MSVQPTVSLGGFEITPPVLRRLK                              | 2467.40 | 2467.39 | 0.01  | 2.96     | 2.E-23 |
| P62805 | TVTAMDVVYALK                                         | 1309.70 | 1309.70 | 0.00  | -1.49    | 2.E-23 |
| P62805 | TVTAMDVVYALK                                         | 1314.65 | 1309.70 | 4.95  | 3766.75  | 2.E-23 |
| P62805 | TVTAMDVVYALK                                         | 1314.67 | 1309.70 | 4.97  | 3778.72  | 2.E-23 |
| P0C0S8 | TRIIPRHLQLAIRNDEELNK                                 | 2428.30 | 2428.37 | -0.07 | -30.41   | 2.E-23 |
| P0C0S8 | TRIIPRHLQLAIRNDEELNK                                 | 2428.42 | 2428.37 | 0.05  | 19.42    | 2.E-23 |
| Q71UI9 | RITPRHLQLAIRGDEELDSLK                                | 2572.39 | 2572.44 | -0.05 | -18.92   | 2.E-23 |
| P62906 | AVDIPHMDIEALKK                                       | 1578.84 | 1578.84 | 0.00  | -1.98    | 2.E-23 |
| P0C0S8 | TRIIPRHLQLAIRNDEELNK                                 | 2428.33 | 2428.37 | -0.04 | -17.80   | 2.E-23 |
| P0C0S8 | TRIIPRHLQLAIRNDEELNK                                 | 2428.36 | 2428.37 | -0.01 | -3.47    | 2.E-23 |
| P0C0S8 | VTIAQGGVLPNIQAVLLPK                                  | 1930.12 | 1930.16 | -0.05 | -23.31   | 2.E-23 |
| P0C0S8 | VTIAQGGVLPNIQAVLLPK                                  | 1930.15 | 1930.16 | -0.01 | -3.36    | 2.E-23 |
| P62277 | GLAPDLPEDLYHLIK                                      | 1688.87 | 1692.91 | -4.04 | -2393.22 | 2.E-23 |

|        |                                   |         |         |       |          |        |
|--------|-----------------------------------|---------|---------|-------|----------|--------|
| P62277 | GLAPDLPEDLYHLIK                   | 1692.91 | 1692.91 | 0.00  | -1.55    | 2.E-23 |
| Q71UI9 | RITPRHLQLAIRGDEELDSLIIK           | 2572.43 | 2572.44 | -0.01 | -2.59    | 2.E-23 |
| P62736 | AGFAGDDAPRAVFPISIVGRPRHQGVMVGMGQK | 3307.69 | 3307.68 | 0.01  | 1.75     | 2.E-23 |
| P05787 | KIETRDGKLVSESSDVLPK               | 2103.04 | 2100.14 | 2.90  | 1378.05  | 3.E-23 |
| P07355 | SALSGHLETVILGLLK                  | 1649.94 | 1649.97 | -0.03 | -17.07   | 3.E-23 |
| P07355 | SALSGHLETVILGLLK                  | 1649.97 | 1649.97 | 0.00  | -2.04    | 3.E-23 |
| O95232 | (49)MISAAQLLDELMGRDRNLAPDEK       | 2627.29 | 2627.30 | -0.01 | -2.02    | 3.E-23 |
| P40429 | YQAVTATLEEK                       | 1251.61 | 1251.63 | -0.02 | -13.31   | 3.E-23 |
| P40429 | YQAVTATLEEK                       | 1251.63 | 1251.63 | 0.00  | -1.01    | 3.E-23 |
| P19338 | TLVLSNLSYSATEETLQEVFEK            | 2500.25 | 2500.26 | -0.01 | -4.33    | 3.E-23 |
| P98179 | LFVGGILNFNTDEQALEDHFSSFGPISEVVVVK | 3493.73 | 3493.74 | -0.01 | -3.51    | 3.E-23 |
| P16403 | (51)SETAPAAPAAAPPAEK              | 1519.75 | 1519.75 | 0.00  | 0.77     | 3.E-23 |
| P05787 | KIETRDGKLVSESSDVLPK               | 2100.14 | 2100.14 | -0.01 | -2.38    | 3.E-23 |
| Q9UMS4 | TVPEELVKPEELSK                    | 1593.76 | 1596.86 | -3.10 | -1944.72 | 4.E-23 |
| Q9UMS4 | TVPEELVKPEELSK                    | 1596.86 | 1596.86 | 0.00  | -1.51    | 4.E-23 |

|        |                          |         |         |       |          |        |
|--------|--------------------------|---------|---------|-------|----------|--------|
| Q9UMS4 | TVPEELVKPEELSK           | 1598.71 | 1596.86 | 1.85  | 1157.36  | 4.E-23 |
| P62805 | VFLENVIRDAVITYTEHAK      | 2104.10 | 2104.10 | 0.00  | -2.03    | 4.E-23 |
| P23246 | ERETPPRFAQHGTFEYEYSQRWK  | 2941.39 | 2941.39 | 0.00  | -1.34    | 4.E-23 |
| P33778 | RSTITSREIQTAVRLLLLPGELAK | 2552.81 | 2551.48 | 1.33  | 521.81   | 4.E-23 |
| Q9UKM9 | SNIDALLSRLEQIAAEQK       | 1995.14 | 1998.07 | -2.93 | -1468.73 | 5.E-23 |
| Q9UKM9 | SNIDALLSRLEQIAAEQK       | 1998.03 | 1998.07 | -0.04 | -21.04   | 5.E-23 |
| Q9UKM9 | SNIDALLSRLEQIAAEQK       | 1998.07 | 1998.07 | 0.00  | -2.22    | 5.E-23 |
| P62805 | VFLENVIRDAVITYTEHAK      | 2104.10 | 2104.10 | 0.00  | -0.79    | 5.E-23 |
| P07355 | LSLEGDHSTPPSAYGSVK       | 1843.90 | 1843.90 | 0.00  | 0.07     | 5.E-23 |
| P07355 | LSLEGDHSTPPSAYGSVK       | 1847.85 | 1843.90 | 3.95  | 2139.91  | 5.E-23 |
| P26447 | ELLTRELPSFLGK            | 1501.85 | 1501.85 | 0.00  | -1.86    | 5.E-23 |
| P63220 | (49)MQNDAGEFVDLYVPRK     | 1922.92 | 1922.92 | 0.00  | -2.32    | 6.E-23 |
| Q00839 | HAAENPGKYNILGTNTIMDK     | 2186.08 | 2186.08 | 0.00  | -1.91    | 6.E-23 |
| P07355 | LSLEGDHSTPPSAYGSVK       | 1843.87 | 1843.90 | -0.03 | -18.64   | 6.E-23 |
| P33778 | RSTITSREIQTAVRLLLLPGELAK | 2551.48 | 2551.48 | 0.00  | -0.79    | 6.E-23 |

|        |                                                                                    |         |         |       |          |        |
|--------|------------------------------------------------------------------------------------|---------|---------|-------|----------|--------|
| P33778 | RSTITSREIQTAVRLLLLPGELAK                                                           | 2555.15 | 2551.48 | 3.67  | 1437.05  | 6.E-23 |
| Q71UI9 | ATIAGGGVIPHIHK                                                                     | 1373.70 | 1369.78 | 3.92  | 2854.49  | 7.E-23 |
| P33778 | RSTITSREIQTAVRLLLLPGELAK                                                           | 2551.14 | 2551.48 | -0.34 | -131.48  | 7.E-23 |
| Q9NWH9 | (41)AAATGAVAASAASGQAEK                                                             | 1629.80 | 1629.80 | 0.00  | -1.67    | 7.E-23 |
| P09651 | GGNFGGRSSGPYGGGGQYFAKPRNQGGYGGSSSSSSSYGS<br>GRRF                                   | 4251.93 | 4251.92 | 0.01  | 2.44     | 8.E-23 |
| P38159 | LFIGGLNTETNEK                                                                      | 1434.74 | 1434.74 | 0.00  | -1.07    | 8.E-23 |
| P05204 | VKDEPQRRSARLSAKPAPPKPEPKPK                                                         | 2906.66 | 2906.66 | 0.00  | -1.23    | 9.E-23 |
| P22626 | KRGFGFVTFDDHDPVVK                                                                  | 1978.95 | 1978.95 | 0.00  | -0.04    | 9.E-23 |
| P05787 | MLETKWSLLQQQK                                                                      | 1628.91 | 1631.87 | -2.96 | -1816.31 | 1.E-22 |
| P05787 | MLETKWSLLQQQK                                                                      | 1631.87 | 1631.87 | 0.00  | -1.04    | 1.E-22 |
| P62158 | (41)ADQLTEEQIAEFKEAFSLFDKGDGTITTKELGTVMRSLG<br>QNPTEAELQDMINEVDADGNGTIDFPEFLTMMARK | 8353.94 | 8353.95 | -0.01 | -0.95    | 1.E-22 |
| Q9UKM9 | LFARSTAVTTSSAK                                                                     | 1438.78 | 1438.78 | 0.00  | -0.68    | 1.E-22 |
| Q71UI9 | ATIAGGGVIPHIHK                                                                     | 1369.78 | 1369.78 | 0.00  | -1.37    | 1.E-22 |
| Q71UI9 | ATIAGGGVIPHIHK                                                                     | 1370.76 | 1369.78 | 0.98  | 716.33   | 1.E-22 |
| P07355 | SYSPYDMLESIRK                                                                      | 1587.76 | 1587.76 | 0.00  | -2.89    | 1.E-22 |

|        |                          |         |         |       |          |        |
|--------|--------------------------|---------|---------|-------|----------|--------|
| Q9UKM9 | LFARSTAVTTSSAK           | 1438.76 | 1438.78 | -0.02 | -14.72   | 1.E-22 |
| Q9H307 | (41)AVAVRTLQEQLK         | 1525.85 | 1525.85 | 0.00  | -2.04    | 1.E-22 |
| P0C0S8 | VTIAQGGVLPNIQAVLLPK      | 1930.12 | 1930.16 | -0.04 | -22.69   | 1.E-22 |
| P0C0S8 | VTIAQGGVLPNIQAVLLPK      | 1930.15 | 1930.16 | -0.01 | -3.62    | 1.E-22 |
| P0C0S8 | VTIAQGGVLPNIQAVLLPK      | 1930.21 | 1930.16 | 0.05  | 24.82    | 1.E-22 |
| Q7L4M3 | GQRASLEAAIADAEQRGELAIAIK | 2296.21 | 2296.21 | 0.00  | -1.25    | 1.E-22 |
| P0C0S8 | TRIIPRHLQLAIRNDEELNK     | 2428.37 | 2428.37 | 0.00  | -1.25    | 2.E-22 |
| Q00839 | KRNFILDQTNVSAAAQRRK      | 2215.23 | 2215.23 | 0.00  | -1.06    | 2.E-22 |
| P22626 | KRGFGFVTFDDHDPVDK        | 1982.94 | 1978.95 | 3.99  | 2014.24  | 2.E-22 |
| P26447 | ELLTRELPSFLGK            | 1501.85 | 1501.85 | 0.00  | -0.73    | 2.E-22 |
| P17844 | LIRLMEEIMSEK             | 1488.32 | 1490.78 | -2.46 | -1650.55 | 2.E-22 |
| P17844 | LIRLMEEIMSEK             | 1490.75 | 1490.78 | -0.03 | -17.68   | 2.E-22 |
| P17844 | LIRLMEEIMSEK             | 1490.78 | 1490.78 | 0.00  | -1.71    | 2.E-22 |
| P39023 | SINPLGGFVHYGEVTNDFVMLK   | 2436.20 | 2436.21 | -0.01 | -2.19    | 2.E-22 |
| P19338 | EVFEDAAEIRLVSK           | 1604.84 | 1604.84 | 0.00  | -0.40    | 2.E-22 |

|        |                        |         |         |       |          |        |
|--------|------------------------|---------|---------|-------|----------|--------|
| P38919 | MLVLDEADEMLNK          | 1520.73 | 1519.73 | 1.00  | 658.70   | 2.E-22 |
| P22626 | KRGFGFVTFDDHDPVDKIVLQK | 2560.30 | 2560.34 | -0.04 | -16.70   | 3.E-22 |
| P22626 | KRGFGFVTFDDHDPVDKIVLQK | 2560.34 | 2560.34 | 0.00  | 1.19     | 3.E-22 |
| P16402 | RKASGPPVSELITK         | 1481.86 | 1481.86 | 0.00  | -2.39    | 3.E-22 |
| P17844 | LIRLMEEIMSEK           | 1492.77 | 1490.78 | 1.99  | 1331.85  | 3.E-22 |
| Q9H307 | (41)AVAVRTLQEQLK       | 1525.83 | 1525.85 | -0.02 | -15.87   | 3.E-22 |
| Q9H307 | (41)AVAVRTLQEQLK       | 1525.85 | 1525.85 | 0.00  | -1.58    | 3.E-22 |
| Q13185 | WKDSDEADLVLAKE         | 1483.82 | 1488.75 | -4.93 | -3325.21 | 3.E-22 |
| Q13185 | WKDSDEADLVLAKE         | 1488.75 | 1488.75 | 0.00  | -0.86    | 3.E-22 |
| Q13185 | WKDSDEADLVLAKE         | 1488.81 | 1488.75 | 0.06  | 41.32    | 3.E-22 |
| O14979 | MFIGGLSWDTSKK          | 1468.74 | 1468.74 | 0.00  | -0.42    | 3.E-22 |
| O60506 | ALLERTGYTLDVTTGQRK     | 2021.09 | 2021.09 | 0.00  | -1.99    | 4.E-22 |
| P06748 | MSVQPTVSLGGFEITPPVLRK  | 2467.39 | 2467.39 | 0.00  | -1.54    | 4.E-22 |
| Q13185 | WKDSDEADLVLAKE         | 1488.75 | 1488.75 | 0.00  | -0.80    | 4.E-22 |
| P19338 | EVFEDAAEIRLVSK         | 1601.81 | 1604.84 | -3.03 | -1888.63 | 4.E-22 |



|        |                                             |         |         |       |         |        |
|--------|---------------------------------------------|---------|---------|-------|---------|--------|
| P07355 | WISIMTERSVPHLQK                             | 1823.97 | 1823.97 | 0.00  | -2.47   | 5.E-22 |
| P22626 | KRGFGFVTFDDHDPVDKIVLQK                      | 2560.33 | 2560.34 | -0.01 | -2.36   | 5.E-22 |
| P46777 | HIMGQNVADYMRYLMEEDEDAYKK                    | 2948.30 | 2948.31 | -0.01 | -1.86   | 5.E-22 |
| P11387 | (51)SGDHLHNSQIEADFRLNDSHK                   | 2576.16 | 2576.16 | 0.00  | 1.59    | 5.E-22 |
| P10412 | (51)SETAPAAPAAPAPAEKTPVK                    | 1945.02 | 1945.02 | 0.00  | -2.28   | 6.E-22 |
| O14979 | VFVGGLSPDTSEEQIK                            | 1704.86 | 1704.86 | 0.00  | -1.29   | 6.E-22 |
| Q12906 | RFVMEVEVDGQK                                | 1438.67 | 1435.71 | 2.96  | 2056.26 | 6.E-22 |
| Q12906 | RFVMEVEVDGQK                                | 1438.79 | 1435.71 | 3.08  | 2141.84 | 6.E-22 |
| P19338 | MAPPPKEVEEDSEDEEMSEDEEDD(37)S(37)SGEEVIPQKK | 4221.67 | 4221.66 | 0.01  | 1.47    | 6.E-22 |
| P22626 | IDTIEIITDRQSGK                              | 1587.85 | 1587.85 | 0.00  | -0.74   | 7.E-22 |
| P19338 | GYAFIEFASFEDAK                              | 1593.74 | 1593.74 | 0.00  | -0.12   | 7.E-22 |
| P60709 | DLYANTVLSGGTTMYPGIADRMQK                    | 2601.26 | 2601.26 | 0.00  | -0.61   | 7.E-22 |
| Q04695 | ATMQNLNDRLASYLDK                            | 1851.91 | 1851.91 | 0.00  | -1.40   | 7.E-22 |
| Q53F64 | KIFVGGLNPEATEEK                             | 1630.86 | 1630.86 | 0.00  | -0.43   | 7.E-22 |
| Q53F64 | KIFVGGLNPEATEEK                             | 1634.82 | 1630.86 | 3.96  | 2423.94 | 7.E-22 |

|        |                                                                                     |         |         |       |         |        |
|--------|-------------------------------------------------------------------------------------|---------|---------|-------|---------|--------|
| P51991 | GGSFGRSSGSPYGGGYGSGGGSGGYGSRRF                                                      | 2831.19 | 2831.24 | -0.05 | -19.10  | 8.E-22 |
| P22626 | RSRGFGVTFSSMAEVDAAMAARPHSIDGRVVEPK                                                  | 3777.88 | 3777.88 | 0.00  | -0.87   | 8.E-22 |
| P52272 | GIGMGNIGPAGMGMEGIGFGINK                                                             | 2177.04 | 2177.04 | 0.00  | -1.79   | 8.E-22 |
| P62318 | IRFLILPDMLK                                                                         | 1357.80 | 1357.82 | -0.02 | -16.60  | 9.E-22 |
| P62318 | IRFLILPDMLK                                                                         | 1357.82 | 1357.82 | 0.00  | -1.57   | 9.E-22 |
| A2BDF6 | STELLIRKLPFQRLVREIAQDFKTDLRFQSSAVMALQEASEAYL<br>VGLFEDTNLCAIHAKRVTIMPKDIQLARRIRGERA | 9080.87 | 9082.91 | -2.04 | -225.12 | 9.E-22 |
| P09651 | RGFAFVTFDHDSVDK                                                                     | 1854.85 | 1854.85 | 0.00  | 0.47    | 9.E-22 |
| P51991 | KIFVGGIKEDTEEYNLRDYFEK                                                              | 2702.27 | 2692.34 | 9.93  | 3674.99 | 9.E-22 |
| P51991 | KIFVGGIKEDTEEYNLRDYFEK                                                              | 2710.16 | 2692.34 | 17.82 | 6576.07 | 9.E-22 |
| P26599 | TDSSPNQARAQAALQAVNSVQSGNLALAASAAAVDAGMAMA<br>GQSPVLRIVIENLFYPVTLVHLHQIFSK           | 7105.70 | 7105.68 | 0.02  | 2.58    | 9.E-22 |
| P51991 | GGSFGRSSGSPYGGGYGSGGGSGGYGSRRF                                                      | 2831.24 | 2831.24 | 0.00  | -1.69   | 1.E-21 |
| P02545 | QREFESRLADALQELRAQHEDQVEQYKK                                                        | 3443.72 | 3443.72 | 0.00  | 0.25    | 1.E-21 |
| P60709 | DLYANTVLSGGTTMYPGIADRMQK                                                            | 2601.25 | 2601.26 | -0.01 | -4.61   | 1.E-21 |
| Q13185 | WKDSDEADLVLAK                                                                       | 1488.75 | 1488.75 | 0.00  | -1.00   | 1.E-21 |
| P39023 | LDWARERLEQQVPVNQVFGQDEMIDVIGVTK                                                     | 3611.84 | 3611.84 | 0.00  | -0.98   | 1.E-21 |

|        |                                                           |         |         |       |          |        |
|--------|-----------------------------------------------------------|---------|---------|-------|----------|--------|
| P07355 | SYSPYDMLESIRK                                             | 1587.73 | 1587.76 | -0.03 | -18.13   | 1.E-21 |
| P07355 | SYSPYDMLESIRK                                             | 1587.76 | 1587.76 | 0.00  | -0.37    | 1.E-21 |
| P26599 | HQNVQLPREGQEDQGLTK                                        | 2076.03 | 2076.03 | 0.00  | -1.98    | 1.E-21 |
| P07355 | LSLEGDHSTPPSAYGSVK                                        | 1843.90 | 1843.90 | 0.00  | -2.43    | 1.E-21 |
| P02545 | AAYEAELGDARK                                              | 1292.64 | 1292.64 | 0.00  | -0.34    | 1.E-21 |
| P04083 | DITSDTSGDFRNALLSLAK                                       | 2023.02 | 2023.02 | 0.00  | -1.96    | 2.E-21 |
| Q14978 | (41)ADAGIRRVVPSDLVPLVLGFLRDNQLSEVANK                      | 3566.91 | 3566.92 | -0.01 | -2.85    | 2.E-21 |
| Q00839 | YNILGTNTIMDK                                              | 1381.69 | 1381.69 | 0.00  | -0.83    | 2.E-21 |
| P19338 | NLPYKVTQDELKEVFEDAAEIRLVSK                                | 3033.59 | 3033.60 | -0.01 | -2.05    | 2.E-21 |
| P23246 | AFERCSEGVFLLTTTPRVIVEPLEQLDDEDGLPEK                       | 4042.01 | 4042.02 | -0.01 | -1.76    | 2.E-21 |
| P16403 | (51)SETAPAAPAAAPPAEK                                      | 1516.76 | 1519.75 | -2.99 | -1974.16 | 2.E-21 |
| P16403 | (51)SETAPAAPAAAPPAEK                                      | 1519.75 | 1519.75 | 0.00  | 0.44     | 2.E-21 |
| P63220 | (49)MQNDAGEFVDLYVPRK                                      | 1924.93 | 1922.92 | 2.01  | 1043.96  | 2.E-21 |
| P05387 | LASVPAGGAVAVSAAPGSAAPAAGSAPAAAEKKDEKKEESE<br>ESDDDMGFGLFD | 5204.44 | 5204.43 | 0.01  | 2.09     | 2.E-21 |
| P46778 | RQPAPPREAHFVRTNGKEPELLEPIPYEFMA                           | 3619.83 | 3618.84 | 0.99  | 274.00   | 2.E-21 |

|        |                                           |         |         |       |         |        |
|--------|-------------------------------------------|---------|---------|-------|---------|--------|
| O14979 | VFVGGLSPDTSEEQIK                          | 1704.83 | 1704.86 | -0.03 | -18.42  | 2.E-21 |
| O14979 | VFVGGLSPDTSEEQIK                          | 1704.86 | 1704.86 | 0.00  | -1.70   | 2.E-21 |
| P16402 | RKASGPPVSELITK                            | 1481.86 | 1481.86 | 0.00  | -2.05   | 2.E-21 |
| P19338 | GIAYIEFKTEADAEK                           | 1683.84 | 1683.84 | 0.00  | -1.02   | 2.E-21 |
| A6NI71 | PLGGSLMEYAILSIAAMNEPK                     | 2388.23 | 2388.24 | -0.01 | -2.32   | 2.E-21 |
| Q3BDU5 | LDNARQSAERNSNLVGAAHEELQQSRIRIDSLSAQLSQLQK | 4573.36 | 4573.37 | -0.01 | -1.90   | 2.E-21 |
| Q3BDU5 | LDNARQSAERNSNLVGAAHEELQQSRIRIDSLSAQLSQLQK | 4574.25 | 4573.37 | 0.88  | 192.80  | 2.E-21 |
| P04083 | QAWFIENEEQEYVQTVK                         | 2140.01 | 2140.01 | -0.01 | -2.32   | 2.E-21 |
| P19338 | TLVLSNLSYSATEETLQEVFEK                    | 2501.20 | 2500.26 | 0.94  | 374.77  | 2.E-21 |
| P22626 | SGNFGGSRNMGGPYGGGNYGPGGSGGSGGYGGRSRY      | 3357.43 | 3357.44 | -0.01 | -2.56   | 2.E-21 |
| P0C0S8 | TRIIPRHLQLAIRNDEELNK                      | 2432.35 | 2428.37 | 3.98  | 1636.47 | 2.E-21 |
| P05386 | KVEAKKEESEESDDDMGFGLFD                    | 2504.08 | 2504.09 | -0.01 | -2.21   | 3.E-21 |
| P19338 | GIAYIEFKTEADAEK                           | 1685.93 | 1683.84 | 2.09  | 1237.11 | 3.E-21 |
| Q16695 | KPHRYRPGTVALREIRRYQK                      | 2523.44 | 2523.44 | 0.00  | -1.06   | 3.E-21 |
| P0C0S8 | TRIIPRHLQLAIRNDEELNK                      | 2428.33 | 2428.37 | -0.04 | -17.06  | 3.E-21 |

|        |                                    |         |         |       |          |        |
|--------|------------------------------------|---------|---------|-------|----------|--------|
| P0C0S8 | TRIIPRHLQLAIRNDEELNK               | 2428.37 | 2428.37 | 0.00  | -1.83    | 3.E-21 |
| Q53F64 | IFVGGLNPEATEEK                     | 1500.78 | 1502.76 | -1.98 | -1322.40 | 3.E-21 |
| Q53F64 | IFVGGLNPEATEEK                     | 1505.83 | 1502.76 | 3.07  | 2039.45  | 3.E-21 |
| Q53F64 | IFVGGLNPEATEEK                     | 1505.85 | 1502.76 | 3.09  | 2053.89  | 3.E-21 |
| P05787 | KIETRDGKLVSESSDVLPK                | 2103.04 | 2100.14 | 2.90  | 1377.67  | 3.E-21 |
| P41219 | NLQEAEWYK                          | 1308.60 | 1308.60 | 0.00  | -1.16    | 3.E-21 |
| P22626 | SGNFGGSRNMGGPYGGGNYGPGGSGGGYGGRSRY | 3357.37 | 3357.44 | -0.07 | -21.30   | 3.E-21 |
| Q16695 | KPHRYRPGTVALREIRRYQK               | 2523.41 | 2523.44 | -0.03 | -12.99   | 3.E-21 |
| P19338 | TLVLSNLSYSATEETLQEVFEK             | 2500.25 | 2500.26 | -0.01 | -2.85    | 3.E-21 |
| Q12905 | RNQDLAPNSAEQASILSLVTK              | 2254.19 | 2254.19 | 0.00  | -1.24    | 4.E-21 |
| P16401 | (51)SETAPAETATPAPVEK               | 1639.79 | 1639.79 | 0.00  | -0.97    | 4.E-21 |
| Q53F64 | IFVGGLNPEATEEK                     | 1502.76 | 1502.76 | 0.00  | -1.55    | 4.E-21 |
| Q53F64 | IFVGGLNPEATEEK                     | 1503.74 | 1502.76 | 0.98  | 649.62   | 4.E-21 |
| Q53F64 | IFVGGLNPEATEEK                     | 1506.80 | 1502.76 | 4.04  | 2682.21  | 4.E-21 |
| P62805 | TVTAMDVVYALK                       | 1310.67 | 1309.70 | 0.97  | 741.41   | 4.E-21 |

|        |                              |         |         |        |          |        |
|--------|------------------------------|---------|---------|--------|----------|--------|
| P62805 | TVTAMDVVYALK                 | 1310.69 | 1309.70 | 0.99   | 751.86   | 4.E-21 |
| P63220 | (49)MQNDAGEFVDLYVPRK         | 1922.92 | 1922.92 | 0.00   | 1.79     | 4.E-21 |
| P05787 | LKLEAELGNMQGLVEDFK           | 2033.04 | 2033.05 | -0.01  | -2.65    | 4.E-21 |
| P62805 | TVTAMDVVYALK                 | 1312.70 | 1309.70 | 3.00   | 2282.75  | 5.E-21 |
| P05787 | KIETRDGKLVSESSDVLPK          | 2100.14 | 2100.14 | -0.01  | -2.38    | 5.E-21 |
| P62805 | TVTAMDVVYALK                 | 1309.70 | 1309.70 | 0.00   | -2.79    | 6.E-21 |
| P62805 | TVTAMDVVYALK                 | 1314.67 | 1309.70 | 4.97   | 3778.49  | 6.E-21 |
| P05787 | KIETRDGKLVSESSDVLPK          | 2100.14 | 2100.14 | 0.00   | 1.52     | 6.E-21 |
| P14136 | LALDIEIATYRK                 | 1404.80 | 1404.80 | 0.00   | -0.45    | 6.E-21 |
| P35268 | FTLDCTHPVEDGIMDAANFEQFLQERIK | 3400.52 | 3266.54 | 133.98 | 39398.60 | 6.E-21 |
| Q99848 | WNTRESYDDVSSFRAK             | 1957.02 | 1959.91 | -2.89  | -1477.39 | 6.E-21 |
| P18621 | EQIVPKPEEEVAQK               | 1622.85 | 1622.85 | 0.00   | -1.43    | 6.E-21 |
| P0C0S8 | TRIIPRHLQLAIRNDEELNK         | 2428.37 | 2428.37 | 0.00   | 1.43     | 8.E-21 |
| P04083 | TPAQFDADELRAAMK              | 1662.80 | 1662.80 | 0.00   | -0.92    | 8.E-21 |
| Q16695 | QLAT(55)KVARKSAPATGGVK       | 1824.01 | 1824.06 | -0.05  | -25.12   | 9.E-21 |

|        |                                |         |         |       |         |        |
|--------|--------------------------------|---------|---------|-------|---------|--------|
| P04083 | TPAQFDADELRAAMK                | 1662.80 | 1662.80 | 0.00  | -2.54   | 9.E-21 |
| Q16695 | QLAT(55)KVARKSAPATGGVK         | 1824.04 | 1824.06 | -0.02 | -12.95  | 1.E-20 |
| Q16695 | QLAT(55)KVARKSAPATGGVK         | 1824.06 | 1824.06 | 0.00  | -1.11   | 1.E-20 |
| Q16695 | QLAT(55)KVARKSAPATGGVK         | 1824.09 | 1824.06 | 0.03  | 15.50   | 1.E-20 |
| P06748 | LAADEDDEDDDEEDDEDDDDDFDDEEAEEK | 3739.21 | 3722.19 | 17.02 | 4551.74 | 1.E-20 |
| Q04695 | ATMQNLNDRLASYLDK               | 1851.91 | 1851.91 | 0.00  | -2.04   | 1.E-20 |
| P06748 | LAADEDDEDDDEEDDEDDDDDFDDEEAEEK | 3745.17 | 3722.19 | 22.98 | 6135.19 | 1.E-20 |
| P84090 | (51)SHTILLVQPTK                | 1277.73 | 1277.73 | 0.00  | -0.51   | 1.E-20 |
| P09651 | RAVSREDSQRPGAHLTVK             | 2010.92 | 2006.08 | 4.84  | 2408.83 | 1.E-20 |
| P09651 | RAVSREDSQRPGAHLTVK             | 2010.92 | 2006.08 | 4.84  | 2408.83 | 1.E-20 |
| Q04695 | ATMQNLNDRLASYLDK               | 1850.85 | 1851.91 | -1.06 | -572.27 | 1.E-20 |
| P14866 | SDALETGLFLNHQMK                | 1865.90 | 1865.90 | 0.00  | -1.05   | 1.E-20 |
| Q9Y3U8 | ALRYPMAVGLNK                   | 1331.74 | 1331.74 | 0.00  | -1.32   | 1.E-20 |
| Q9Y3U8 | ALRYPMAVGLNK                   | 1331.83 | 1331.74 | 0.09  | 67.08   | 1.E-20 |
| Q9Y3U8 | ALRYPMAVGLNK                   | 1332.73 | 1331.74 | 0.99  | 739.65  | 1.E-20 |

|        |                                 |         |         |       |          |        |
|--------|---------------------------------|---------|---------|-------|----------|--------|
| P10412 | (51)SETAPAAPAAPAEK(38)TPVK      | 2024.97 | 2024.98 | -0.01 | -3.72    | 2.E-20 |
| Q8IU66 | TRIIPRHLQLAVRNDDEELNK           | 2414.35 | 2414.35 | 0.00  | -1.65    | 2.E-20 |
| P09651 | RAVSREDSQRPGAHLTVK              | 2006.08 | 2006.08 | 0.00  | -1.01    | 2.E-20 |
| P62805 | VFLENVIRDAVITYTEHAK             | 2147.10 | 2104.10 | 43.00 | 20028.30 | 2.E-20 |
| P62805 | RQGRTLYGFGG                     | 1213.60 | 1210.62 | 2.98  | 2452.72  | 2.E-20 |
| P09651 | PRNQGGYGGSSSSSYGSGRRF           | 2250.01 | 2250.02 | -0.01 | -2.71    | 2.E-20 |
| P21796 | WNTDNTLGTEITVEDQLARGLK          | 2473.24 | 2473.24 | 0.00  | -0.46    | 2.E-20 |
| P07355 | LSLEGDHSTPPSAYGSVK              | 1843.90 | 1843.90 | 0.00  | 0.39     | 2.E-20 |
| P08670 | TVETRDGQVINETSQHDDLE            | 2422.10 | 2422.10 | 0.00  | 1.59     | 3.E-20 |
| Q13573 | GWIPRLLEDFGDGGAFPEIHVAQYPLDMGRK | 3493.73 | 3483.74 | 9.99  | 2860.07  | 3.E-20 |
| P62805 | RQGRTLYGFGG                     | 1213.60 | 1210.62 | 2.98  | 2452.47  | 3.E-20 |
| P62805 | RQGRTLYGFGG                     | 1210.60 | 1210.62 | -0.02 | -12.54   | 3.E-20 |
| P08758 | TLFGRDLLDDLK                    | 1408.83 | 1404.76 | 4.07  | 2886.27  | 3.E-20 |
| P62805 | RQGRTLYGFGG                     | 1210.62 | 1210.62 | 0.00  | -0.90    | 3.E-20 |
| P16403 | ASGPPVSELITK                    | 1198.66 | 1197.66 | 1.00  | 835.04   | 3.E-20 |



|        |                                                 |         |         |       |          |        |
|--------|-------------------------------------------------|---------|---------|-------|----------|--------|
| P23246 | DKLESEMEDAYHEHQANLLRQDLMRRQEELRRMEELHNQE<br>MQK | 5435.54 | 5435.56 | -0.02 | -4.17    | 3.E-20 |
| O14979 | EYFGAFGEIENIELPMDTK                             | 2202.01 | 2202.02 | -0.01 | -2.70    | 3.E-20 |
| P08758 | TLFGRDLLDDLK                                    | 1404.76 | 1404.76 | 0.00  | -1.31    | 3.E-20 |
| A6NI71 | PLLGSLMEYAILSIAAMNEPK                           | 2388.24 | 2388.24 | 0.00  | -1.15    | 4.E-20 |
| P33778 | RSTITSREIQTAVRLLLPGELAK                         | 2551.47 | 2551.48 | -0.01 | -2.17    | 4.E-20 |
| P19338 | KMAPPPKEVEEDSEDEEMSEDEEDD(37)SSGEEVIPQK         | 4141.70 | 4141.69 | 0.01  | 1.40     | 4.E-20 |
| P62805 | RQGRTLYGFGG                                     | 1209.75 | 1210.62 | -0.87 | -715.26  | 4.E-20 |
| P62805 | RQGRTLYGFGG                                     | 1210.62 | 1210.62 | 0.00  | -0.15    | 4.E-20 |
| P62805 | RQGRTLYGFGG                                     | 1206.71 | 1210.62 | -3.91 | -3242.53 | 4.E-20 |
| P55769 | AYPLADAHLTKK                                    | 1322.77 | 1326.73 | -3.97 | -2997.48 | 5.E-20 |
| P55769 | AYPLADAHLTKK                                    | 1326.73 | 1326.73 | 0.00  | -1.25    | 5.E-20 |
| P62736 | AGFAGDDAPRAVFPSIVGRPRHQGVMMVGMGQK               | 3307.67 | 3307.68 | -0.01 | -2.85    | 5.E-20 |
| P33778 | AMGIMNSFVNDIFERIAGEASRLAHYNK                    | 3153.54 | 3153.55 | -0.01 | -2.62    | 5.E-20 |
| P07910 | LKGDDLQAIKK                                     | 1228.72 | 1227.72 | 1.00  | 815.76   | 6.E-20 |
| P14136 | LALDIEIATYRK                                    | 1404.80 | 1404.80 | 0.00  | -0.81    | 6.E-20 |

|        |                                                                  |         |         |        |          |        |
|--------|------------------------------------------------------------------|---------|---------|--------|----------|--------|
| P62805 | RQGRTLYGFGG                                                      | 1206.71 | 1210.62 | -3.91  | -3242.20 | 6.E-20 |
| P62917 | DIHDPGRGAPLAK                                                    | 1458.79 | 1458.79 | 0.00   | -1.69    | 6.E-20 |
| P0C0S8 | GNYAERVGAGAPVYLAHVLEYLTAIELELAGNAARDNKK                          | 4133.15 | 4090.15 | 43.00  | 10403.60 | 6.E-20 |
| P26447 | ELLTRELPSFLGK                                                    | 1501.85 | 1501.85 | 0.00   | -1.26    | 6.E-20 |
| P33778 | RSTITSREIQTAVRLLLPGELAK                                          | 2551.47 | 2551.48 | -0.01  | -3.11    | 6.E-20 |
| P62736 | AGFAGDDAPRAVFPVIVGRPRHQGVVMVGMGQK                                | 3307.60 | 3307.68 | -0.08  | -24.37   | 7.E-20 |
| P62736 | AGFAGDDAPRAVFPVIVGRPRHQGVVMVGMGQK                                | 3307.67 | 3307.68 | -0.01  | -2.18    | 7.E-20 |
| P18621 | EQIVPKPEEEVAQK                                                   | 1622.85 | 1622.85 | 0.00   | -1.80    | 7.E-20 |
| P51991 | WGTLTDCVVMRDPQTK                                                 | 1848.89 | 1848.89 | 0.00   | -0.82    | 7.E-20 |
| P14136 | LALDIEIATYRK                                                     | 1408.84 | 1404.80 | 4.04   | 2869.14  | 7.E-20 |
| P33778 | RSTITSREIQTAVRLLLPGELAK                                          | 2551.48 | 2551.48 | 0.00   | -1.73    | 8.E-20 |
| P33778 | RSTITSREIQTAVRLLLPGELAK                                          | 2552.45 | 2551.48 | 0.97   | 378.76   | 8.E-20 |
| A2BDF6 | STELLIRKLPFQRLVREIAQDFKTDLRFQSSAVMALQEASEAYL<br>VGLFEDTNLCAIHAKE | 6856.49 | 6722.54 | 133.95 | 19536.50 | 8.E-20 |
| A2BDF6 | STELLIRKLPFQRLVREIAQDFKTDLRFQSSAVMALQEASEAYL<br>VGLFEDTNLCAIHAKE | 6871.52 | 6722.54 | 148.98 | 21681.40 | 8.E-20 |
| P35637 | GEATVSFDDPPSAK                                                   | 1419.65 | 1419.65 | 0.00   | 3.41     | 8.E-20 |

|        |                                      |         |         |       |          |        |
|--------|--------------------------------------|---------|---------|-------|----------|--------|
| P35637 | GEATVSFDDPPSAK                       | 1419.63 | 1419.65 | -0.02 | -13.85   | 8.E-20 |
| P35637 | GEATVSFDDPPSAK                       | 1419.65 | 1419.65 | 0.00  | 1.58     | 8.E-20 |
|        |                                      | 2104.05 |         |       |          | 8.E-20 |
| P60709 | DLYANTVLSGGTTMYPGIADRMQK             | 2597.38 | 2601.26 | -3.88 | -1493.73 | 8.E-20 |
| P62736 | AGFAGDDAPRAVFPSIVGRPRHQGVMVGMGQK     | 3307.67 | 3307.68 | -0.01 | -2.15    | 8.E-20 |
| Q14978 | (41)ADAGIRRVVPSDLYPLVLGFLRDNQLSEVANK | 3566.65 | 3566.92 | -0.27 | -76.93   | 9.E-20 |
| Q14978 | (41)ADAGIRRVVPSDLYPLVLGFLRDNQLSEVANK | 3566.91 | 3566.92 | -0.01 | -3.16    | 9.E-20 |
| P40429 | YQAVTATLEEK                          | 1251.63 | 1251.63 | 0.00  | -0.93    | 9.E-20 |
| P40429 | YQAVTATLEEK                          | 1253.64 | 1251.63 | 2.01  | 1600.72  | 9.E-20 |
| P62244 | VRMNVLADALK                          | 1228.70 | 1228.70 | 0.00  | -0.94    | 9.E-20 |
| P35659 | KKVERLTMQVSSLQREPFTIAQ GK            | 2773.53 | 2773.53 | 0.00  | -1.35    | 9.E-20 |
| P62805 | VFLENVIRDAV TYTEHAK                  | 2147.10 | 2104.10 | 43.00 | 20027.00 | 9.E-20 |
| Q15233 | (49)MQSNKTFNLEK                      | 1380.67 | 1380.67 | 0.00  | 1.10     | 9.E-20 |
| P60709 | DLYANTVLSGGTTMYPGIADRMQK             | 2601.21 | 2601.26 | -0.05 | -20.33   | 9.E-20 |
| P62736 | AGFAGDDAPRAVFPSIVGRPRHQGVMVGMGQK     | 3307.68 | 3307.68 | 0.00  | -1.09    | 1.E-19 |

|        |                                      |         |         |       |        |        |
|--------|--------------------------------------|---------|---------|-------|--------|--------|
| P60709 | DLYANTVLSGGTTMYPGIADRMQK             | 2601.25 | 2601.26 | -0.01 | -1.99  | 1.E-19 |
| O14979 | LLESRYHQIGSGK                        | 1486.79 | 1486.79 | 0.00  | -1.42  | 1.E-19 |
| Q71UI9 | AVSRSQRAGLQFPVGRIHRHLK               | 2512.44 | 2512.44 | 0.00  | -1.20  | 1.E-19 |
| P38159 | LFIGGLNTETNEK                        | 1434.74 | 1434.74 | 0.00  | -0.37  | 1.E-19 |
| P38159 | LFIGGLNTETNEK                        | 1435.72 | 1434.74 | 0.98  | 680.40 | 1.E-19 |
| P62805 | RKTVTAMDVVYALK                       | 1593.89 | 1593.89 | 0.00  | -2.02  | 1.E-19 |
| P98179 | LFVGGLNFNTDEQALEDHFSSFGPISEVVVK      | 3493.74 | 3493.74 | 0.00  | -1.31  | 1.E-19 |
| P60903 | GYLTKEDLRVLM EK                      | 1693.91 | 1693.91 | 0.00  | -1.40  | 1.E-19 |
| P11142 | NQVAMNPTNTVFD AK                     | 1648.79 | 1648.79 | 0.00  | -1.82  | 1.E-19 |
| P0C0S8 | TRIIPRHLQLAIRNDEELNK                 | 2428.36 | 2428.37 | -0.01 | -2.40  | 1.E-19 |
| P19338 | TLVLSNLSYSATEETLQEVFEK               | 2500.25 | 2500.26 | -0.01 | -3.85  | 1.E-19 |
| P07355 | SYSPYDMLESIRK                        | 1587.73 | 1587.76 | -0.03 | -17.75 | 1.E-19 |
| P07355 | SYSPYDMLESIRK                        | 1587.76 | 1587.76 | 0.00  | -1.00  | 1.E-19 |
| P09651 | LFIGGLSFETTDESLRSHFEQWGTLDCVVMRDPNTK | 4229.02 | 4229.02 | 0.00  | -0.76  | 2.E-19 |
| P09651 | LFIGGLSFETTDESLRSHFEQWGTLDCVVMRDPNTK | 4230.15 | 4229.02 | 1.13  | 267.74 | 2.E-19 |

|        |                                          |         |         |       |        |        |
|--------|------------------------------------------|---------|---------|-------|--------|--------|
| P0C0S8 | TRIIPRHLQLAIRNDEELNK                     | 2428.33 | 2428.37 | -0.04 | -17.19 | 2.E-19 |
| P0C0S8 | VTIAQGGVLPNIQAVLLPK                      | 1930.09 | 1930.16 | -0.07 | -35.90 | 2.E-19 |
| P0C0S8 | VTIAQGGVLPNIQAVLLPK                      | 1930.15 | 1930.16 | -0.01 | -3.36  | 2.E-19 |
| P19338 | VFGNEIKLEKPK                             | 1400.80 | 1400.80 | 0.00  | -0.51  | 2.E-19 |
| Q96QV6 | LLGGVTIAQGGVLPNIQAVLLPK                  | 2270.36 | 2270.37 | -0.01 | -3.09  | 2.E-19 |
| O75526 | YGRIVEVLLMK                              | 1319.76 | 1319.76 | 0.00  | -0.91  | 2.E-19 |
| P05787 | KIETRDGKLVSESSDVLPK                      | 2100.14 | 2100.14 | 0.00  | 2.14   | 3.E-19 |
| Q6F113 | GNYAERVGAGAPVYMAAVLEYLELAEILELAGNAARDNKK | 4108.11 | 4108.11 | 0.00  | -0.63  | 3.E-19 |
| P33778 | RSTITSREIQTAVRLLLLPGELAK                 | 2551.48 | 2551.48 | 0.00  | -1.93  | 3.E-19 |
| P62851 | LITPAVVSERLK                             | 1324.81 | 1324.81 | 0.00  | -0.38  | 3.E-19 |
| P62851 | LITPAVVSERLK                             | 1325.69 | 1324.81 | 0.88  | 664.86 | 3.E-19 |
| P09651 | RSRFGFVTYATVVEEVDAAAMNARPHKVDGRVVEPK     | 3887.99 | 3887.99 | 0.00  | -1.04  | 3.E-19 |
| Q16695 | KPHRYRPGTVALREIRRYQK                     | 2523.43 | 2523.44 | -0.01 | -2.45  | 3.E-19 |
| Q08211 | ILTTEGRNALIHK                            | 1464.84 | 1464.84 | 0.00  | -1.53  | 4.E-19 |
| P62805 | RQGRTLYGFGG                              | 1210.62 | 1210.62 | 0.00  | -0.98  | 4.E-19 |

|        |                                                    |         |         |       |          |        |
|--------|----------------------------------------------------|---------|---------|-------|----------|--------|
| Q16695 | KPHRYRPGTVALREIRRYQK                               | 2524.40 | 2523.44 | 0.96  | 378.87   | 4.E-19 |
| P0C0S8 | VTIAQGGVLPNIQAVLLPK                                | 1927.15 | 1930.16 | -3.01 | -1559.54 | 4.E-19 |
| P0C0S8 | VTIAQGGVLPNIQAVLLPK                                | 1930.12 | 1930.16 | -0.05 | -23.31   | 4.E-19 |
| P0C0S8 | VTIAQGGVLPNIQAVLLPK                                | 1930.15 | 1930.16 | -0.01 | -3.36    | 4.E-19 |
| P16104 | GHYAERVGAGAPVYLAHVLEYLTAIELELAGNAARDNKK            | 4115.16 | 4113.16 | 2.00  | 485.61   | 4.E-19 |
| P62805 | RQGRTLYGFGG                                        | 1210.60 | 1210.62 | -0.02 | -13.78   | 4.E-19 |
| P60709 | SYELPDGQVITIGNERFRCPEALFQPSFLGMESCGIHETTFNS<br>IMK | 5192.45 | 5191.46 | 0.99  | 189.93   | 5.E-19 |
| Q92522 | ALVQNDTLLQVK                                       | 1341.77 | 1340.77 | 1.00  | 747.19   | 5.E-19 |
| Q92522 | ALVQNDTLLQVK                                       | 1344.72 | 1340.77 | 3.95  | 2936.57  | 5.E-19 |
| P09651 | PRNQGGYGGSSSSSSSYGSGRRF                            | 2250.02 | 2250.02 | 0.00  | -1.91    | 5.E-19 |
| P19338 | VFGNEIKLEKPK                                       | 1400.80 | 1400.80 | 0.00  | -0.44    | 5.E-19 |
| P62736 | AGFAGDDAPRAVFPSIVGRPRHQGVMVGMGQKDSYVGDEA<br>QSK    | 4487.20 | 4487.19 | 0.01  | 1.58     | 5.E-19 |
| P06748 | MSVQPTVSLGGFEITPPVLRK                              | 2467.40 | 2467.39 | 0.01  | 2.71     | 6.E-19 |
| A2BDF6 | STELLIRKLPFQRLVREIAQDFK                            | 2799.56 | 2799.61 | -0.05 | -18.92   | 6.E-19 |
| A2BDF6 | STELLIRKLPFQRLVREIAQDFK                            | 2799.61 | 2799.61 | 0.00  | 0.48     | 6.E-19 |

|        |                                                                               |         |         |       |          |        |
|--------|-------------------------------------------------------------------------------|---------|---------|-------|----------|--------|
| P84090 | (51)SHTILLVQPTK                                                               | 1277.73 | 1277.73 | 0.00  | -0.59    | 6.E-19 |
| P26599 | ELKTDSSPNQARAQAALQAVNSVQSGNLALAASAAAVDAGM<br>AMAGQSPVLRRIIVENLFYPVTLVDLHQIFSK | 7475.90 | 7475.90 | 0.00  | -0.51    | 6.E-19 |
| P14136 | LALDIEIATYRK                                                                  | 1404.80 | 1404.80 | 0.00  | -0.10    | 6.E-19 |
| Q04695 | (52)TTSIRQFTSSSSIK                                                            | 1583.82 | 1583.82 | 0.00  | 1.05     | 7.E-19 |
| P62241 | LLACIASRPGQCGRADGYVLEGK                                                       | 2388.14 | 2376.20 | 11.94 | 4998.13  | 7.E-19 |
| P60709 | IWHHTFYNELRVAPEEHPVLLTEAPLNPK                                                 | 3452.80 | 3449.79 | 3.01  | 870.43   | 7.E-19 |
| P07355 | TPAQYDASELK                                                                   | 1222.58 | 1221.59 | 0.99  | 807.63   | 7.E-19 |
| P07355 | TPAQYDASELK                                                                   | 1222.62 | 1221.59 | 1.03  | 843.01   | 7.E-19 |
| Q99729 | MFVGGLSWDTSKK                                                                 | 1454.72 | 1454.72 | 0.00  | -1.49    | 7.E-19 |
| Q99880 | AMGIMNSFVNDIFERIASEASRLAHYNK                                                  | 3183.55 | 3183.56 | -0.01 | -2.68    | 7.E-19 |
| P13645 | NQILNLTTDNANILLQIDNARLAADDFRLK                                                | 3395.81 | 3395.82 | -0.01 | -3.85    | 8.E-19 |
| P0C0S8 | TRIIPRHLQLAIRNDEELNK                                                          | 2430.71 | 2428.37 | 2.34  | 961.19   | 8.E-19 |
| P62805 | RQGRTLYGFGG                                                                   | 1210.62 | 1210.62 | 0.00  | -1.14    | 8.E-19 |
| P07355 | TPAQYDASELK                                                                   | 1217.56 | 1221.59 | -4.03 | -3307.44 | 9.E-19 |
| Q9NW13 | (41)AGLTLFVGRLPPSARSEQLEELFSQVGPVK                                            | 3266.76 | 3266.77 | -0.01 | -2.23    | 9.E-19 |

|        |                                     |         |         |       |         |        |
|--------|-------------------------------------|---------|---------|-------|---------|--------|
| P62805 | RQGRTLYGFGG                         | 1210.60 | 1210.62 | -0.02 | -14.20  | 9.E-19 |
| P46777 | ASFLRAQERAAES                       | 1434.72 | 1434.72 | 0.00  | -1.61   | 9.E-19 |
| Q14103 | IFVGGLSPDTPPEEK                     | 1487.75 | 1487.75 | 0.00  | -1.17   | 9.E-19 |
| P62805 | TVTAMDVVYALK                        | 1310.67 | 1309.70 | 0.97  | 740.96  | 9.E-19 |
| P07355 | LSLEGDHSTPPSAYGSVK                  | 1843.86 | 1843.90 | -0.04 | -19.67  | 9.E-19 |
| P07355 | LSLEGDHSTPPSAYGSVK                  | 1843.89 | 1843.90 | -0.01 | -2.75   | 9.E-19 |
| P0C0S8 | TRIIPRHLQLAIRNDEELNK                | 2427.04 | 2428.37 | -1.33 | -547.47 | 1.E-18 |
| P0C0S8 | TRIIPRHLQLAIRNDEELNK                | 2429.76 | 2428.37 | 1.39  | 570.62  | 1.E-18 |
| Q08211 | GMTLVTPQLLLFASK                     | 1731.00 | 1731.00 | 0.00  | -2.10   | 1.E-18 |
| Q9NW13 | (41)AGLTLFVGRLLPPSARSEQLEELFSQVGPVK | 3266.76 | 3266.77 | -0.01 | -1.86   | 1.E-18 |
| P07355 | TPAQYDASELK                         | 1221.59 | 1221.59 | 0.00  | -0.91   | 1.E-18 |
| P07355 | TPAQYDASELK                         | 1225.61 | 1221.59 | 4.02  | 3280.97 | 1.E-18 |
| P07355 | TPAQYDASELK                         | 1225.66 | 1221.59 | 4.07  | 3322.69 | 1.E-18 |
| P07355 | TPAQYDASELK                         | 1225.68 | 1221.59 | 4.09  | 3336.92 | 1.E-18 |
| P53999 | EQISDIDDAVRKL                       | 1500.78 | 1500.78 | 0.00  | 2.10    | 1.E-18 |



|        |                                                                  |         |         |       |         |        |
|--------|------------------------------------------------------------------|---------|---------|-------|---------|--------|
| Q53F64 | IFVGGLNPEATEEK                                                   | 1502.76 | 1502.76 | 0.00  | 1.51    | 1.E-18 |
| Q6F113 | SRSSRAGLQFPVGRVHRLLRKGNYAERVGAGAPVYMAAVLE<br>YLTAEILELAGNAARDNKK | 6509.50 | 6509.51 | -0.01 | -1.88   | 1.E-18 |
| P0C0S8 | TRIIPRHLQLAIRNDEELNK                                             | 2427.32 | 2428.37 | -1.05 | -433.42 | 1.E-18 |
| P0C0S8 | TRIIPRHLQLAIRNDEELNK                                             | 2428.37 | 2428.37 | 0.00  | 1.10    | 1.E-18 |
| P0C0S8 | TRIIPRHLQLAIRNDEELNK                                             | 2428.43 | 2428.37 | 0.06  | 24.53   | 1.E-18 |
| P0C0S8 | TRIIPRHLQLAIRNDEELNK                                             | 2428.44 | 2428.37 | 0.07  | 29.80   | 1.E-18 |
| P0C0S8 | TRIIPRHLQLAIRNDEELNK                                             | 2432.04 | 2428.37 | 3.67  | 1509.99 | 1.E-18 |
| P0C0S8 | TRIIPRHLQLAIRNDEELNK                                             | 2432.10 | 2428.37 | 3.73  | 1535.41 | 1.E-18 |
| P19338 | EVFEDAAEIRLVSK                                                   | 1604.84 | 1604.84 | 0.00  | -0.90   | 1.E-18 |
| P62805 | TVTAMDVVYALK                                                     | 1309.68 | 1309.70 | -0.02 | -15.54  | 1.E-18 |
| P62805 | TVTAMDVVYALK                                                     | 1312.70 | 1309.70 | 3.00  | 2281.99 | 1.E-18 |
| Q9H307 | (41)AVAVRTLQEQLEK                                                | 1525.85 | 1525.85 | 0.00  | -2.30   | 1.E-18 |
| P16402 | RKASGPPVSELITK                                                   | 1481.86 | 1481.86 | 0.00  | 1.12    | 1.E-18 |
| P16402 | RKASGPPVSELITK                                                   | 1484.84 | 1481.86 | 2.98  | 2007.40 | 1.E-18 |
| P07355 | LSLEGDHSTPPSAYGSVK                                               | 1843.90 | 1843.90 | 0.00  | -2.37   | 1.E-18 |

|        |                                                                                     |         |         |       |         |        |
|--------|-------------------------------------------------------------------------------------|---------|---------|-------|---------|--------|
| P62805 | TVTAMDVVYALK                                                                        | 1309.65 | 1309.70 | -0.05 | -36.46  | 2.E-18 |
| P62805 | TVTAMDVVYALK                                                                        | 1309.66 | 1309.70 | -0.04 | -33.87  | 2.E-18 |
| P62805 | TVTAMDVVYALK                                                                        | 1309.67 | 1309.70 | -0.03 | -24.40  | 2.E-18 |
| P62805 | TVTAMDVVYALK                                                                        | 1309.70 | 1309.70 | 0.00  | -2.33   | 2.E-18 |
| P26373 | LATQLTGPVMPVRNVYK                                                                   | 1887.04 | 1886.04 | 1.00  | 529.47  | 2.E-18 |
| P26373 | LATQLTGPVMPVRNVYK                                                                   | 1888.91 | 1886.04 | 2.87  | 1521.37 | 2.E-18 |
| P62280 | (41)ADIQTERAYQK                                                                     | 1362.68 | 1363.67 | -0.99 | -724.17 | 2.E-18 |
| P62280 | (41)ADIQTERAYQK                                                                     | 1363.67 | 1363.67 | 0.00  | -1.18   | 2.E-18 |
| P62805 | TVTAMDVVYALK                                                                        | 1314.67 | 1309.70 | 4.97  | 3779.33 | 2.E-18 |
| A5PLR1 | STELLIRKLPFQRLVREIAQDFKTDLRFQSSAVMALQEACEAY<br>LVGLFEDTNLCAIHAKRVTIMPKDIQLARRIRGERA | 9096.92 | 9098.88 | -1.96 | -215.26 | 2.E-18 |
| P02545 | NIYSEELRETK                                                                         | 1380.69 | 1380.69 | 0.00  | -1.52   | 2.E-18 |
| P06576 | GFQQILAGEYDHLPEQAFYMGPIEEAVAK                                                       | 3349.62 | 3349.63 | -0.01 | -2.28   | 2.E-18 |
| P07355 | LSLEGDHSTPPSAYGSVK                                                                  | 1843.90 | 1843.90 | 0.00  | -1.88   | 2.E-18 |
| P07355 | SYSPYDMLESIRK                                                                       | 1587.73 | 1587.76 | -0.03 | -16.43  | 2.E-18 |
| P07355 | SYSPYDMLESIRK                                                                       | 1587.76 | 1587.76 | 0.00  | -1.50   | 2.E-18 |

|        |                             |         |         |       |         |        |
|--------|-----------------------------|---------|---------|-------|---------|--------|
| P07355 | SYSPYDMLESIRK               | 1590.75 | 1587.76 | 2.99  | 1880.06 | 2.E-18 |
| Q9Y277 | VNNASLIGLGYTQTLRPGVK        | 2102.17 | 2100.17 | 2.00  | 951.97  | 2.E-18 |
| Q00839 | EKPYFPIPEEYTFIQNVPLEDRVRGPK | 3260.68 | 3260.69 | -0.01 | -3.08   | 3.E-18 |
| P0C0S8 | VTIAQGGVLPNIQAVLLPK         | 1930.13 | 1930.16 | -0.03 | -15.07  | 3.E-18 |
| P0C0S8 | VTIAQGGVLPNIQAVLLPK         | 1930.16 | 1930.16 | 0.00  | -0.61   | 3.E-18 |
| P22626 | KRGFGFVTFDDHDPVDK           | 1978.95 | 1978.95 | 0.00  | -1.15   | 3.E-18 |
| P22626 | KRGFGFVTFDDHDPVDK           | 1982.94 | 1978.95 | 3.99  | 2013.08 | 3.E-18 |
| Q16695 | KPHRYRPGTVALREIRRYQK        | 2523.41 | 2523.44 | -0.03 | -13.46  | 3.E-18 |
| Q16695 | KPHRYRPGTVALREIRRYQK        | 2523.44 | 2523.44 | 0.00  | -0.94   | 3.E-18 |
| P47914 | AQAAAASVPAQAPK              | 1376.74 | 1376.74 | 0.00  | -0.35   | 3.E-18 |
| P0C0S8 | VTIAQGGVLPNIQAVLLPK         | 1930.09 | 1930.16 | -0.07 | -35.90  | 3.E-18 |
| P0C0S8 | VTIAQGGVLPNIQAVLLPK         | 1930.15 | 1930.16 | -0.01 | -3.36   | 3.E-18 |
| P19338 | GLSEDTEETLK                 | 1324.69 | 1321.62 | 3.07  | 2320.54 | 3.E-18 |
| Q09666 | ISMPDVDLHLKGPK              | 1548.83 | 1548.83 | 0.00  | 1.38    | 3.E-18 |
| P26373 | LILFPRKPSAPK                | 1370.77 | 1365.85 | 4.92  | 3585.88 | 3.E-18 |

|        |                                      |         |         |       |          |        |
|--------|--------------------------------------|---------|---------|-------|----------|--------|
| P22626 | LFIGGLSFETTEESLRNYEQWGKLTDCVVMRDPASK | 4282.07 | 4282.07 | 0.00  | -1.15    | 3.E-18 |
| Q00839 | YNILGTNTIMDK                         | 1381.69 | 1381.69 | 0.00  | 1.13     | 3.E-18 |
| P19338 | GLSEDTEETLK                          | 1321.60 | 1321.62 | -0.02 | -14.44   | 3.E-18 |
| P19338 | GLSEDTEETLK                          | 1321.62 | 1321.62 | 0.00  | -0.37    | 3.E-18 |
| P09651 | KRGFAFVTFDDHDSVDK                    | 1982.95 | 1982.95 | 0.00  | -1.36    | 4.E-18 |
| P60709 | RGILTLKYPIE(317)HGIVTNWDDMEK         | 2741.42 | 2741.42 | 0.00  | 1.65     | 4.E-18 |
| Q02539 | SLVSKGTLVQTK                         | 1257.73 | 1259.74 | -2.01 | -1594.75 | 4.E-18 |
| Q02539 | SLVSKGTLVQTK                         | 1259.74 | 1259.74 | 0.00  | -1.02    | 4.E-18 |
| P07355 | LSLEGDHSTPPSAYGSVK                   | 1843.90 | 1843.90 | 0.00  | -2.43    | 4.E-18 |
| O43390 | VLFVRNLATTVTEEILEK                   | 2074.16 | 2074.17 | -0.01 | -2.83    | 4.E-18 |
| O43390 | VLFVRNLATTVTEEILEK                   | 2077.11 | 2074.17 | 2.94  | 1417.32  | 4.E-18 |
| P05386 | KVEAKKEESEESDDDMGFGLFD               | 2504.09 | 2504.09 | 0.00  | 1.47     | 4.E-18 |
| P12270 | (41)AAVLQQVLERTELNK                  | 1752.97 | 1752.97 | 0.00  | -1.89    | 5.E-18 |
| P06748 | MSVQPTVSLGGFEITPPVLRK                | 2467.38 | 2467.39 | -0.01 | -2.31    | 5.E-18 |
| P06748 | MSVQPTVSLGGFEITPPVLRK                | 2469.35 | 2467.39 | 1.96  | 793.24   | 5.E-18 |

|        |                                  |         |         |       |          |        |
|--------|----------------------------------|---------|---------|-------|----------|--------|
| P33778 | RSTITSREIQTAVRLLLLPGELAK         | 2551.48 | 2551.48 | 0.00  | -1.34    | 5.E-18 |
| P33778 | RSTITSREIQTAVRLLLLPGELAK         | 2553.45 | 2551.48 | 1.97  | 771.10   | 5.E-18 |
| P26373 | STESLQANVQRLK                    | 1472.79 | 1472.79 | 0.00  | -1.56    | 5.E-18 |
| P63220 | DHASIQMNVAEVDKVTGRFNGQFK         | 2690.32 | 2690.32 | 0.00  | 1.14     | 5.E-18 |
| P33778 | RSTITSREIQTAVRLLLLPGELAK         | 2551.48 | 2551.48 | 0.00  | -1.38    | 5.E-18 |
| P33778 | RSTITSREIQTAVRLLLLPGELAK         | 2552.41 | 2551.48 | 0.93  | 365.25   | 5.E-18 |
| P26373 | LILFPRKPSAPK                     | 1365.83 | 1365.85 | -0.02 | -14.28   | 6.E-18 |
| P26373 | LILFPRKPSAPK                     | 1365.85 | 1365.85 | 0.00  | -1.03    | 6.E-18 |
| P26373 | LILFPRKPSAPK                     | 1368.76 | 1365.85 | 2.91  | 2126.37  | 6.E-18 |
| P23396 | GGKPEPPAMPQPVPPTA                | 1569.79 | 1572.80 | -3.01 | -1918.97 | 6.E-18 |
| P23396 | GGKPEPPAMPQPVPPTA                | 1572.80 | 1572.80 | 0.00  | -1.64    | 6.E-18 |
| P23396 | GGKPEPPAMPQPVPPTA                | 1575.02 | 1572.80 | 2.22  | 1410.54  | 6.E-18 |
| Q14103 | IFVGGLSPDTPEEK                   | 1487.75 | 1487.75 | 0.00  | -0.83    | 6.E-18 |
| O00567 | MSQVAPSLSALIGEAVGARLIAHAGSLTNLAK | 3147.73 | 3145.73 | 2.00  | 636.37   | 6.E-18 |
| Q53F64 | IFVGGLNPEATEEK                   | 1505.85 | 1502.76 | 3.09  | 2054.09  | 6.E-18 |

|        |                                                                                    |         |         |       |         |        |
|--------|------------------------------------------------------------------------------------|---------|---------|-------|---------|--------|
| A5PLR1 | STELLIRKLPFQRLVREIAQDFKTDLRFQSSAVMALQEACEAY<br>LVGLFEDTNLCAIHAKRVTIMPKDIQLARRIGERA | 9096.93 | 9098.88 | -1.95 | -214.51 | 6.E-18 |
| P04908 | LLGRVTIAQGGVLPNIQAVLLPK                                                            | 2369.44 | 2369.45 | -0.01 | -4.04   | 7.E-18 |
| P07355 | GLGTDEDSLIEIICSRTNQELQEINRVYK                                                      | 3335.66 | 3335.67 | -0.01 | -2.52   | 7.E-18 |
| P60903 | EFPGFLENQKDPLAVDK                                                                  | 1945.98 | 1945.98 | 0.00  | -0.51   | 7.E-18 |
| P35268 | AGNLGGGVVTIERSK                                                                    | 1456.80 | 1456.80 | 0.00  | -1.62   | 7.E-18 |
| P35268 | AGNLGGGVVTIERSK                                                                    | 1457.78 | 1456.80 | 0.98  | 671.74  | 7.E-18 |
| P35268 | AGNLGGGVVTIERSK                                                                    | 1458.79 | 1456.80 | 1.99  | 1365.41 | 7.E-18 |
| Q08211 | GMTLVTPQLLLFASK                                                                    | 1731.00 | 1731.00 | 0.00  | -2.16   | 7.E-18 |
| P16403 | ERSGVSLAALKK                                                                       | 1257.71 | 1257.74 | -0.03 | -22.78  | 7.E-18 |
| P16403 | ERSGVSLAALKK                                                                       | 1257.72 | 1257.74 | -0.02 | -13.56  | 7.E-18 |
| P16403 | ERSGVSLAALKK                                                                       | 1257.74 | 1257.74 | 0.00  | -2.27   | 7.E-18 |
| P16403 | ERSGVSLAALKK                                                                       | 1257.76 | 1257.74 | 0.02  | 14.82   | 7.E-18 |
| O75475 | GYPHWPARVDEVPDGAVKPPTNKLPPIFFFGTHETAFLGPK                                          | 4431.28 | 4432.28 | -1.00 | -226.18 | 7.E-18 |
| Q00839 | YNILGTNTIMDK                                                                       | 1381.69 | 1381.69 | 0.00  | -0.61   | 7.E-18 |
| Q00839 | YNILGTNTIMDK                                                                       | 1381.67 | 1381.69 | -0.02 | -14.44  | 8.E-18 |

|        |                                       |         |         |       |          |        |
|--------|---------------------------------------|---------|---------|-------|----------|--------|
| Q00839 | YNILGTNTIMDK                          | 1381.69 | 1381.69 | 0.00  | -1.05    | 8.E-18 |
| Q16695 | KPHRYRPGTVALREIRRYQK                  | 2523.36 | 2523.44 | -0.08 | -29.99   | 8.E-18 |
| Q16695 | KPHRYRPGTVALREIRRYQK                  | 2523.43 | 2523.44 | -0.01 | -2.57    | 8.E-18 |
| Q16695 | KPHRYRPGTVALREIRRYQK                  | 2524.40 | 2523.44 | 0.96  | 379.07   | 8.E-18 |
| Q53F64 | IFVGGLNPEATEEK                        | 1502.76 | 1502.76 | 0.00  | -1.02    | 9.E-18 |
| P20700 | LLEGEERLK                             | 1214.65 | 1214.65 | 0.00  | -0.93    | 9.E-18 |
| Q96QV6 | LLGGVTIAQGGVLPNIQAVLLPK               | 2270.36 | 2270.37 | -0.01 | -3.05    | 9.E-18 |
| P22626 | KRGFGFVTFDDHDPVDK                     | 1978.92 | 1978.95 | -0.03 | -13.63   | 9.E-18 |
| P22626 | KRGFGFVTFDDHDPVDK                     | 1978.95 | 1978.95 | 0.00  | -1.10    | 9.E-18 |
| Q6FG99 | (49)MASVSELARIYSALILHDDEVTVTEDKINALIK | 3690.71 | 3698.94 | -8.23 | -2230.56 | 1.E-17 |
| Q6FG99 | (49)MASVSELARIYSALILHDDEVTVTEDKINALIK | 3690.79 | 3698.94 | -8.15 | -2207.75 | 1.E-17 |
| Q04695 | (52)TTSIRQFTSSSSIK                    | 1583.82 | 1583.82 | 0.00  | -1.35    | 1.E-17 |
| Q04695 | (52)TTSIRQFTSSSSIK                    | 1584.78 | 1583.82 | 0.96  | 607.45   | 1.E-17 |
| P62805 | VFLENVIRDAVITYTEHAK                   | 2107.78 | 2104.10 | 3.68  | 1745.79  | 1.E-17 |
| P62805 | VFLENVIRDAVITYTEHAK                   | 2108.45 | 2104.10 | 4.35  | 2062.49  | 1.E-17 |

|        |                                                      |         |         |       |          |        |
|--------|------------------------------------------------------|---------|---------|-------|----------|--------|
| P08670 | KLHEEEIQELQAQIQEQHVQIDVDVSKPDLTAALRDVRRQQYE<br>SVAAK | 5424.80 | 5424.79 | 0.01  | 2.11     | 1.E-17 |
| O60812 | QKVDSLLENLEK                                         | 1411.77 | 1414.77 | -3.00 | -2125.16 | 1.E-17 |
| Q53F64 | IFVGGLNPEATEEK                                       | 1502.76 | 1502.76 | 0.00  | -0.89    | 1.E-17 |
| P07355 | GRRRAEDGSVIDYELIDQDARDLYDAGVK                        | 3138.51 | 3138.52 | -0.01 | -2.84    | 1.E-17 |
| P07355 | DIISDTSGDFRK                                         | 1352.66 | 1352.66 | 0.00  | -2.28    | 1.E-17 |
| P22626 | KRGFGFVTFDDHDPVDK                                    | 1975.03 | 1978.95 | -3.92 | -1983.75 | 1.E-17 |
| P22626 | KRGFGFVTFDDHDPVDK                                    | 1982.94 | 1978.95 | 3.99  | 2013.98  | 1.E-17 |
| P62805 | VFLENVIRDAVITYTEHAK                                  | 2100.10 | 2104.10 | -4.00 | -1906.85 | 1.E-17 |
| P62805 | VFLENVIRDAVITYTEHAK                                  | 2104.06 | 2104.10 | -0.04 | -16.76   | 1.E-17 |
| P62805 | VFLENVIRDAVITYTEHAK                                  | 2104.10 | 2104.10 | 0.00  | -1.88    | 1.E-17 |
| P35268 | ITVTSEVPFSK                                          | 1206.65 | 1206.65 | 0.00  | -0.65    | 1.E-17 |
| P35268 | ITVTSEVPFSK                                          | 1207.67 | 1206.65 | 1.02  | 845.03   | 1.E-17 |
| P35268 | ITVTSEVPFSK                                          | 1210.62 | 1206.65 | 3.97  | 3279.74  | 1.E-17 |
| P26373 | LATQLTGPVMPVRNVYKK                                   | 2014.14 | 2014.14 | 0.00  | -1.10    | 1.E-17 |
| O00148 | FMQDPMEVFVDDDETK                                     | 1829.79 | 1829.79 | 0.00  | -2.22    | 1.E-17 |



|        |                                       |         |         |       |         |        |
|--------|---------------------------------------|---------|---------|-------|---------|--------|
| P62314 | NREPVQLETLSIRGNNIRYFILPDSLPLDLLVDVEPK | 4376.36 | 4376.37 | -0.01 | -3.02   | 1.E-17 |
| P05783 | GLQAQIASSGLTVEVDAPK                   | 1883.00 | 1883.00 | 0.00  | -1.42   | 2.E-17 |
| P19338 | QGTEIDGRSISLYYTGEK                    | 2015.98 | 2015.98 | 0.00  | -1.38   | 2.E-17 |
| O14979 | VFVGGLSPDTSEEQIKEYFGAFGEIENIELPMDTK   | 3888.88 | 3888.87 | 0.01  | 2.86    | 2.E-17 |
| P02545 | NIYSEELRETK                           | 1380.69 | 1380.69 | 0.00  | -1.01   | 2.E-17 |
| P02545 | NIYSEELRETK                           | 1383.70 | 1380.69 | 3.01  | 2174.32 | 2.E-17 |
| Q92522 | ALVQNDTLLQVK                          | 1340.77 | 1340.77 | 0.00  | -0.70   | 2.E-17 |
| O60812 | QKVDSLLENLEK                          | 1414.75 | 1414.77 | -0.02 | -14.59  | 2.E-17 |
| O60812 | QKVDSLLENLEK                          | 1414.77 | 1414.77 | 0.00  | -0.31   | 2.E-17 |
| P02545 | SNEDQSMGNWQIK                         | 1535.67 | 1535.67 | 0.00  | -1.86   | 2.E-17 |
| P61978 | RPAEDMEEEQAFK                         | 1578.70 | 1578.70 | 0.00  | -1.71   | 2.E-17 |
| Q96QV6 | LLGGVTIAQGGVLPNIQAVLLPK               | 2270.36 | 2270.37 | -0.01 | -3.27   | 2.E-17 |
| P32969 | TILSNQTVDIPENVDTLK                    | 2112.13 | 2112.13 | 0.00  | -1.51   | 2.E-17 |
| P62917 | KVISSANRAVVGWAGGGRIDKPILK             | 2603.56 | 2603.56 | 0.00  | -0.35   | 2.E-17 |
| P05787 | NKYEDEINKRTEMENEFVLIKK                | 2769.40 | 2769.40 | 0.00  | -1.08   | 2.E-17 |

|        |                                                                                                                                        |          |          |       |          |        |
|--------|----------------------------------------------------------------------------------------------------------------------------------------|----------|----------|-------|----------|--------|
| P36578 | MINTDLSRILK                                                                                                                            | 1302.73  | 1302.73  | 0.00  | -0.50    | 2.E-17 |
| O00567 | YPASTVQILGAEK                                                                                                                          | 1376.73  | 1375.73  | 1.00  | 728.17   | 2.E-17 |
| P16403 | (51)SETAPAAPAAAPPAEK                                                                                                                   | 1519.75  | 1519.75  | 0.00  | 0.51     | 2.E-17 |
| P02545 | QREFESRLADALQELRAQHEDQVEQYKK                                                                                                           | 3443.72  | 3443.72  | 0.00  | 0.65     | 2.E-17 |
| P05386 | KVEAKKEESEESDDDMGFGLFD                                                                                                                 | 2504.09  | 2504.09  | 0.00  | 1.15     | 3.E-17 |
| Q14103 | MFIGGLSWDTTKK                                                                                                                          | 1482.75  | 1482.75  | 0.00  | -0.92    | 3.E-17 |
| P19338 | GFGFVDFNSEEDAK                                                                                                                         | 1559.78  | 1560.67  | -0.89 | -569.51  | 3.E-17 |
| P19338 | GFGFVDFNSEEDAK                                                                                                                         | 1560.65  | 1560.67  | -0.02 | -15.84   | 3.E-17 |
| P19338 | GFGFVDFNSEEDAK                                                                                                                         | 1560.67  | 1560.67  | 0.00  | -1.23    | 3.E-17 |
| Q96125 | (51)SLYDDLGVETSDSKTEGWSK                                                                                                               | 2258.02  | 2258.02  | 0.00  | 1.44     | 3.E-17 |
| P02545 | LRDLEDLARERDTSRRLAELK                                                                                                                  | 2641.43  | 2641.43  | 0.00  | 0.37     | 3.E-17 |
| P41219 | NLQEAEEWYK                                                                                                                             | 1308.60  | 1308.60  | 0.00  | -0.55    | 3.E-17 |
| Q9BUQ0 | SRDYTRPDLPSGDSQPQLDQTMAAAFAGAPIISASPYAGAGF<br>PPTFAIPQAAGLSVPNVH GALAPLAIPSAAAAAAAAAAGRIAIPGL<br>AGAGNSVLLVSNLNPERVTPQSLFILFGVYGDVQRVK | 12213.38 | 12214.40 | -1.02 | -83.24   | 4.E-17 |
| Q15233 | ALDRCSEGSFLLTTFFRPVTVPEMDQLDDEEGLPEK                                                                                                   | 4033.92  | 4033.93  | -0.01 | -1.74    | 4.E-17 |
| P62805 | VFLENVIRDAVITYTEHAK                                                                                                                    | 2147.10  | 2104.10  | 43.00 | 20027.30 | 4.E-17 |

|        |                         |         |         |       |          |        |
|--------|-------------------------|---------|---------|-------|----------|--------|
| P62805 | VFLENVIRDAVITYTEHAK     | 2148.08 | 2104.10 | 43.98 | 20472.90 | 4.E-17 |
| P62277 | GLSQSALPYRRSVPTWLK      | 2058.11 | 2058.14 | -0.03 | -14.88   | 4.E-17 |
| P62277 | GLSQSALPYRRSVPTWLK      | 2058.14 | 2058.14 | 0.00  | -1.66    | 4.E-17 |
| P26599 | LPIDVTEGEVISLGLPFGK     | 1983.09 | 1983.09 | 0.00  | -1.86    | 4.E-17 |
| P16403 | ERSGVSLAALKK            | 1255.72 | 1257.74 | -2.02 | -1606.53 | 4.E-17 |
| P07355 | TPAQYDASELK             | 1221.59 | 1221.59 | 0.00  | -0.59    | 5.E-17 |
| P07355 | TPAQYDASELK             | 1222.62 | 1221.59 | 1.03  | 844.08   | 5.E-17 |
| Q00839 | RNFILDQTNVSAAAQRRK      | 2087.13 | 2087.13 | 0.00  | -1.10    | 5.E-17 |
| Q9UMS4 | VAHPIRPKPPSATSIPAILK    | 2092.25 | 2092.25 | 0.00  | -1.16    | 5.E-17 |
| P16403 | ERSGVSLAALKK            | 1257.72 | 1257.74 | -0.02 | -13.88   | 6.E-17 |
| P16403 | ERSGVSLAALKK            | 1257.74 | 1257.74 | 0.00  | -1.00    | 6.E-17 |
| P14866 | SDALETGLFLNHYQMK        | 1865.90 | 1865.90 | 0.00  | -1.70    | 6.E-17 |
| O43390 | YGGPPDSVYSGVQPGIGTEVFGK | 2506.17 | 2506.24 | -0.07 | -25.99   | 6.E-17 |
| O43390 | YGGPPDSVYSGVQPGIGTEVFGK | 2506.23 | 2506.24 | -0.01 | -2.73    | 6.E-17 |
| P06748 | MSVQPTVSLGGFEITPPVLRK   | 2467.38 | 2467.39 | -0.01 | -2.92    | 6.E-17 |

|        |                                      |         |         |       |          |        |
|--------|--------------------------------------|---------|---------|-------|----------|--------|
| P06748 | MSVQPTVSLGGFEITPPVVLRLK              | 2469.35 | 2467.39 | 1.96  | 793.57   | 6.E-17 |
| P33778 | RSTITSREIQTAVRLLLLPGELAK             | 2551.47 | 2551.48 | -0.01 | -3.15    | 6.E-17 |
| P07355 | TPAQYDASELK                          | 1221.58 | 1221.59 | -0.02 | -12.29   | 7.E-17 |
| P07355 | TPAQYDASELK                          | 1225.61 | 1221.59 | 4.02  | 3281.21  | 7.E-17 |
| P07355 | TPAQYDASELK                          | 1225.68 | 1221.59 | 4.09  | 3337.00  | 7.E-17 |
| P18621 | EQIVPKPEEEVAQK                       | 1622.85 | 1622.85 | 0.00  | -2.29    | 7.E-17 |
| Q02539 | KALAAAGYDVEK                         | 1234.66 | 1234.66 | 0.00  | -0.58    | 7.E-17 |
| Q02539 | KALAAAGYDVEK                         | 1235.65 | 1234.66 | 0.99  | 799.49   | 7.E-17 |
| Q8NC51 | PGHLQEGFGCVVTNRFDQLFDDSDPFVVK        | 3537.65 | 3537.65 | 0.00  | -1.05    | 7.E-17 |
| P33778 | RSTITSREIQTAVRLLLLPGELAK             | 2551.40 | 2551.48 | -0.08 | -31.84   | 7.E-17 |
| P61978 | ALRTDYNASVSPDSSGPERILSADIETIGEILKK   | 3944.06 | 3944.07 | -0.01 | -1.33    | 7.E-17 |
| Q14978 | (41)ADAGIRRVVPSDLYPLVLGFLRDNQLSEVANK | 3566.92 | 3566.92 | 0.00  | -1.06    | 7.E-17 |
| Q09666 | AGLRVSAPEVSVGHK                      | 1513.65 | 1505.83 | 7.82  | 5169.09  | 7.E-17 |
| P41219 | MALDIEIATYRK                         | 1422.75 | 1422.75 | 0.00  | -1.38    | 8.E-17 |
| P33778 | RSTITSREIQTAVRLLLLPGELAK             | 2547.47 | 2551.48 | -4.01 | -1572.86 | 8.E-17 |

|        |                                                  |         |         |       |          |        |
|--------|--------------------------------------------------|---------|---------|-------|----------|--------|
| P46783 | NRIAIYELLFK                                      | 1378.80 | 1378.80 | 0.00  | -1.70    | 8.E-17 |
| P41219 | NLQEAEWYK                                        | 1308.58 | 1308.60 | -0.02 | -12.16   | 8.E-17 |
| P41219 | NLQEAEWYK                                        | 1308.60 | 1308.60 | 0.00  | 0.98     | 8.E-17 |
| Q14103 | IFVGGLSPDTPEEK                                   | 1487.75 | 1487.75 | 0.00  | -1.84    | 9.E-17 |
| P46777 | HIMGQNVADYMRYLMEEDEDAYKK                         | 2962.56 | 2948.31 | 14.25 | 4810.50  | 9.E-17 |
| P46777 | HIMGQNVADYMRYLMEEDEDAYKK                         | 2965.44 | 2948.31 | 17.13 | 5776.31  | 9.E-17 |
| P62987 | IIEPSLRQLAQK                                     | 1394.82 | 1394.82 | 0.00  | -1.17    | 1.E-16 |
| P20700 | NSQGEEVAQRSTVFK                                  | 1676.71 | 1678.83 | -2.12 | -1263.75 | 1.E-16 |
| P33778 | RSTITREIQTAVRLLLPGELAK                           | 2551.48 | 2551.48 | 0.00  | -1.42    | 1.E-16 |
| P62841 | EAPPMKPEVVK                                      | 1352.70 | 1352.70 | 0.00  | -1.08    | 1.E-16 |
| P62841 | EAPPMKPEVVK                                      | 1355.70 | 1352.70 | 3.00  | 2216.52  | 1.E-16 |
| P05787 | LLEGEESRLESGMQNMSIHTK                            | 2388.14 | 2388.14 | 0.00  | -1.35    | 1.E-16 |
| Q09666 | FSMPGFKGEGPEVDVKLPKADVDVSGPKMDAEVPDVNIEGP<br>DAK | 4610.26 | 4610.26 | 0.00  | 0.80     | 1.E-16 |
| P46783 | NRIAIYELLFK                                      | 1375.59 | 1378.80 | -3.21 | -2332.93 | 1.E-16 |
| Q99880 | AMGIMNSFVNDIFERIASEASRLAHYNK                     | 3183.55 | 3183.56 | -0.01 | -2.90    | 1.E-16 |

|        |                                          |         |         |       |          |        |
|--------|------------------------------------------|---------|---------|-------|----------|--------|
| P33778 | RSTITSREIQTAVRLLLPGELAK                  | 2552.41 | 2551.48 | 0.93  | 364.59   | 1.E-16 |
| P26447 | ALDVMVSTFHK                              | 1246.64 | 1246.64 | 0.00  | -0.86    | 2.E-16 |
| P26447 | ALDVMVSTFHK                              | 1247.63 | 1246.64 | 0.99  | 790.64   | 2.E-16 |
| P0C0S8 | VTIAQGGVLPNIQAVLLPK                      | 1930.15 | 1930.16 | -0.01 | -3.77    | 2.E-16 |
| P20700 | NSQGEEVAQRSTVFK                          | 1678.80 | 1678.83 | -0.03 | -17.72   | 2.E-16 |
| P63244 | (52)TEQMTRLRGLK                          | 1318.69 | 1318.69 | 0.00  | -0.92    | 2.E-16 |
| P25398 | (41)AEEGIAAGGVMDVNTALQEVLK               | 2256.12 | 2256.13 | -0.01 | -2.90    | 2.E-16 |
| P16401 | RKATGPPVSELITK                           | 1495.87 | 1495.87 | 0.00  | -1.07    | 2.E-16 |
| Q92522 | ALVQNDTLLQVK                             | 1340.77 | 1340.77 | 0.00  | -0.41    | 2.E-16 |
| P06748 | MSVQPTVSLGGFEITPPVLRK                    | 2467.35 | 2467.39 | -0.04 | -17.88   | 2.E-16 |
| P06748 | MSVQPTVSLGGFEITPPVLRK                    | 2467.38 | 2467.39 | -0.01 | -2.19    | 2.E-16 |
| P43243 | FDSEYERMGRGPGPLQERSLFEK                  | 2727.31 | 2727.31 | 0.00  | -1.63    | 2.E-16 |
| P62736 | AGFAGDDAPRAVFPSIVGRPRHQGMVGMGQK          | 3307.67 | 3307.68 | -0.01 | -2.60    | 2.E-16 |
| P0C0S8 | GNYAERVGAGAPVYLAHVLEYLELAEILELAGNAARDNKK | 4133.16 | 4090.15 | 43.01 | 10404.90 | 2.E-16 |
| P20700 | NSQGEEVAQRSTVFK                          | 1678.83 | 1678.83 | 0.00  | -1.64    | 2.E-16 |

|        |                                                                                     |         |         |       |          |        |
|--------|-------------------------------------------------------------------------------------|---------|---------|-------|----------|--------|
| P20700 | NSQGEEVAQRSTVFK                                                                     | 1683.79 | 1678.83 | 4.96  | 2945.00  | 2.E-16 |
| A2BDF6 | STELLIRKLPFQRLVREIAQDFKTDLRFQSSAVMALQEASEAYL<br>VGLFEDTNLCAIHAKRVTIMPKDIQLARRIRGERA | 9082.87 | 9082.91 | -0.04 | -4.43    | 2.E-16 |
| P05787 | MLETKWSLLQQQK                                                                       | 1631.87 | 1631.87 | 0.00  | 1.47     | 2.E-16 |
| P35659 | KKVERLTMQVSSLQREPFTIAQGK                                                            | 2773.53 | 2773.53 | 0.00  | -1.53    | 2.E-16 |
| P33778 | RSTITSREIQTAVRLLLLPGELAK                                                            | 2551.47 | 2551.48 | -0.01 | -3.69    | 2.E-16 |
| P33778 | RSTITSREIQTAVRLLLLPGELAK                                                            | 2551.53 | 2551.48 | 0.05  | 20.45    | 2.E-16 |
| P33778 | RSTITSREIQTAVRLLLLPGELAK                                                            | 2552.41 | 2551.48 | 0.93  | 362.59   | 2.E-16 |
| P14866 | NRIQHPSNVLHFFNAPLEVTEENFFEICDELGVK                                                  | 3984.94 | 3984.95 | -0.01 | -1.33    | 2.E-16 |
| P19338 | GIAYIEFKTEADAEK                                                                     | 1683.84 | 1683.84 | 0.00  | -1.38    | 3.E-16 |
| P62277 | GLAPDLPEDLYHLIK                                                                     | 1688.87 | 1692.91 | -4.04 | -2393.22 | 3.E-16 |
| P60709 | DLYANTVLSGGTTMYPGIADRMQK                                                            | 2601.26 | 2601.26 | 0.00  | -1.69    | 3.E-16 |
| Q99880 | AMGIMNSFVNDIFERIASEASRLAHYNK                                                        | 3192.46 | 3183.56 | 8.90  | 2789.09  | 3.E-16 |
| Q99880 | AMGIMNSFVNDIFERIASEASRLAHYNK                                                        | 3196.54 | 3183.56 | 12.98 | 4062.13  | 3.E-16 |
| P62736 | AGFAGDDAPRAVFPISVGRPRHQGVMVGMGQK                                                    | 3307.68 | 3307.68 | 0.00  | -1.43    | 3.E-16 |
| Q15149 | LLSAERAVTGYK                                                                        | 1304.67 | 1306.72 | -2.05 | -1570.95 | 3.E-16 |

|        |                                                                                                  |         |         |       |          |        |
|--------|--------------------------------------------------------------------------------------------------|---------|---------|-------|----------|--------|
| P60709 | ILTERGYSFTTTAEREIVRDIK                                                                           | 2597.38 | 2597.38 | 0.00  | -1.26    | 3.E-16 |
| Q02539 | KALAAAGYDVEK                                                                                     | 1234.66 | 1234.66 | 0.00  | -0.50    | 3.E-16 |
| P19338 | TLVLSNLSYSATEETLQEVFEK                                                                           | 2500.25 | 2500.26 | -0.01 | -4.29    | 3.E-16 |
| P06748 | MSVQPTVSLGGFEITPPVLRK                                                                            | 2467.38 | 2467.39 | -0.01 | -2.76    | 4.E-16 |
| P62277 | GLAPDLPEDLYHLIK                                                                                  | 1692.91 | 1692.91 | 0.00  | -1.55    | 4.E-16 |
| P09651 | GGNFGGRSSGPYGGGQYFAKPRNQGGYGGSSSSSYGS<br>GRRF                                                    | 4251.91 | 4251.92 | -0.01 | -2.36    | 4.E-16 |
| Q15149 | LLSAERAVTGYK                                                                                     | 1306.62 | 1306.72 | -0.10 | -79.04   | 4.E-16 |
| Q15149 | LLSAERAVTGYK                                                                                     | 1306.70 | 1306.72 | -0.02 | -15.21   | 4.E-16 |
| Q15149 | LLSAERAVTGYK                                                                                     | 1306.72 | 1306.72 | 0.00  | -1.21    | 4.E-16 |
| P62280 | (41)ADIQTERAYQK                                                                                  | 1362.69 | 1363.67 | -0.98 | -722.77  | 4.E-16 |
| P62280 | (41)ADIQTERAYQK                                                                                  | 1363.67 | 1363.67 | 0.00  | -1.11    | 4.E-16 |
| P36578 | GHRIEEPELPLVEDKVEGYKK                                                                            | 2662.43 | 2662.43 | 0.00  | -1.41    | 5.E-16 |
| P20700 | LREYEAALNSK                                                                                      | 1293.67 | 1292.67 | 1.00  | 774.81   | 5.E-16 |
| P14866 | RQRQPPLLDHPAEYGGPHGGYHSHYHDEGYGPPPPHYEG<br>RRMGPPVGGHRRGPSRYGPQYGHPPPPPPPEYGPADS<br>PVLMMYGLDQSK | 9977.74 | 9977.75 | -0.01 | -0.65    | 5.E-16 |
| P33778 | AMGIMNSFVNDIFERIAGEASRLAHYNK                                                                     | 3196.55 | 3153.55 | 43.00 | 13452.10 | 5.E-16 |



|        |                                  |         |         |       |          |        |
|--------|----------------------------------|---------|---------|-------|----------|--------|
| P33778 | AMGIMNSFVNDIFERIAGEASRLAHYNK     | 3198.50 | 3153.55 | 44.95 | 14054.30 | 5.E-16 |
| Q07955 | FRSHEGETAYIRVK                   | 1688.85 | 1691.87 | -3.02 | -1785.48 | 5.E-16 |
| Q92804 | TGKPMINLYTDKDTGKPKGEATVSFDDPPSAK | 3407.69 | 3407.69 | 0.00  | 1.14     | 5.E-16 |
| P22626 | KRGFGFVTFDDHDPVDK                | 1978.95 | 1978.95 | 0.00  | -2.01    | 6.E-16 |
| P0C0S8 | VTIAQGGVLPNIQAVLLPK              | 1930.12 | 1930.16 | -0.04 | -20.15   | 6.E-16 |
| P0C0S8 | VTIAQGGVLPNIQAVLLPK              | 1930.15 | 1930.16 | -0.01 | -3.15    | 6.E-16 |
| P15880 | SPYQEFTDHLVK                     | 1462.71 | 1462.71 | 0.00  | -2.20    | 6.E-16 |
| P61978 | RPAEDMEEEEQAFK                   | 1578.70 | 1578.70 | 0.00  | -1.77    | 6.E-16 |
| P16403 | (51)SETAPAAPAAAPPAEK             | 1519.71 | 1519.75 | -0.04 | -28.05   | 7.E-16 |
| P16403 | (51)SETAPAAPAAAPPAEK             | 1519.72 | 1519.75 | -0.03 | -17.32   | 7.E-16 |
| P16403 | (51)SETAPAAPAAAPPAEK             | 1519.75 | 1519.75 | 0.00  | -2.52    | 7.E-16 |
| P16403 | (51)SETAPAAPAAAPPAEK             | 1519.78 | 1519.75 | 0.03  | 18.74    | 7.E-16 |
| Q07955 | FRSHEGETAYIRVK                   | 1691.84 | 1691.87 | -0.03 | -18.81   | 8.E-16 |
| Q07955 | FRSHEGETAYIRVK                   | 1691.87 | 1691.87 | 0.00  | -1.61    | 8.E-16 |
| P62318 | IRFLILPDMLK                      | 1357.82 | 1357.82 | 0.00  | -1.13    | 8.E-16 |

|        |                                       |         |         |       |         |        |
|--------|---------------------------------------|---------|---------|-------|---------|--------|
| P62736 | AGFAGDDAPRAVFPSIVGRPRHQGMVGMGQK       | 3307.60 | 3307.68 | -0.08 | -24.04  | 8.E-16 |
| Q53F64 | KIFVGGLNPEATEEK                       | 1630.86 | 1630.86 | 0.00  | -0.92   | 8.E-16 |
| P08758 | (41)AQVLRGTVTDFPGFDERADAETLRK         | 2833.44 | 2833.44 | 0.00  | -1.53   | 8.E-16 |
| P62081 | IVKPNGEKPDEFESGISQALLELEMNSDLK        | 3330.65 | 3329.67 | 0.98  | 294.47  | 9.E-16 |
| P09651 | LFIGGLSFETTDESLRSHFEQWGTLDCCVVMRDPNTK | 4229.01 | 4229.02 | -0.01 | -2.44   | 9.E-16 |
| P62736 | AGFAGDDAPRAVFPSIVGRPRHQGMVGMGQK       | 3307.68 | 3307.68 | 0.00  | 0.18    | 9.E-16 |
| P18621 | EQIVPKPEEEVAQK                        | 1623.85 | 1622.85 | 1.00  | 616.06  | 9.E-16 |
| P18621 | EQIVPKPEEEVAQK                        | 1626.76 | 1622.85 | 3.91  | 2402.99 | 9.E-16 |
| P41219 | NLQEAEWYK                             | 1308.60 | 1308.60 | 0.00  | -1.54   | 9.E-16 |
| P16403 | ALAAAGYDVEKNNSRIKLGK                  | 2230.24 | 2230.24 | 0.00  | 1.38    | 1.E-15 |
| Q71UI9 | ATIAGGGVIPHIHK                        | 1369.78 | 1369.78 | 0.00  | 1.41    | 1.E-15 |
| Q71UI9 | ATIAGGGVIPHIHK                        | 1373.70 | 1369.78 | 3.92  | 2855.07 | 1.E-15 |
| Q71UI9 | ATIAGGGVIPHIHK                        | 1373.72 | 1369.78 | 3.94  | 2869.81 | 1.E-15 |
| P36578 | MINTDLSRILK                           | 1302.73 | 1302.73 | 0.00  | -0.73   | 1.E-15 |
| P06748 | CGSGPVHISGQHLVAVEEDAEESEDEEEEDVK      | 3334.45 | 3322.44 | 12.01 | 3600.37 | 1.E-15 |

|        |                                                            |         |         |       |         |        |
|--------|------------------------------------------------------------|---------|---------|-------|---------|--------|
| P16403 | KAGGTPRKASGPPVSELITK                                       | 1993.13 | 1993.13 | 0.00  | 0.41    | 1.E-15 |
| P02545 | AGQVVTIWAAGAGATHSPPTDLVWK                                  | 2532.30 | 2532.31 | -0.01 | -3.45   | 1.E-15 |
| P68104 | IGGIGTVPVGRVETGVLKPGMVVTFAPVNVTTTEVK                       | 3520.96 | 3520.97 | -0.01 | -1.91   | 1.E-15 |
| Q14978 | (41)ADAGIRRVVPSDLYPLVLGFLRDNQLSEVANK                       | 3566.91 | 3566.92 | -0.01 | -3.30   | 1.E-15 |
| P19338 | GFGFVDFNSEEDAK                                             | 1560.67 | 1560.67 | 0.00  | -1.55   | 1.E-15 |
| P19338 | GFGFVDFNSEEDAK                                             | 1560.79 | 1560.67 | 0.12  | 75.14   | 1.E-15 |
| P19338 | GFGFVDFNSEEDAK                                             | 1564.77 | 1560.67 | 4.10  | 2617.82 | 1.E-15 |
| Q92499 | (41)AAFSEMGMPEIAQAVEEMDWLLPTDIQAESIPLILGGGD<br>VLMAAETGSGK | 5329.56 | 5329.58 | -0.02 | -3.86   | 1.E-15 |
| P46778 | RQPAPPREAHFVRTNGKEPELLEPIPYEFMA                            | 3619.84 | 3618.84 | 1.00  | 276.18  | 2.E-15 |
| Q9UKM9 | SNIDALLSRLEQIAAEQK                                         | 1998.07 | 1998.07 | 0.00  | 2.33    | 2.E-15 |
| Q53F64 | KIFVGGLNPEATEEK                                            | 1631.86 | 1630.86 | 1.00  | 614.27  | 2.E-15 |
| P0C0S8 | VTIAQGGVLPNIQAVLLPKK                                       | 2058.26 | 2058.26 | 0.00  | -0.80   | 2.E-15 |
| P08758 | (41)AQVLRGTVTDFPGFDERADAETLRK                              | 2833.43 | 2833.44 | -0.01 | -1.92   | 2.E-15 |
| P05787 | AQYEDIANRSRAEAESMYQIKYEELQSLAGK                            | 3590.72 | 3590.73 | -0.01 | -2.31   | 2.E-15 |
| P19338 | TLVLSNLSYSATEETLQEVFEK                                     | 2500.19 | 2500.26 | -0.07 | -27.09  | 2.E-15 |

|        |                                                                                     |         |         |        |          |        |
|--------|-------------------------------------------------------------------------------------|---------|---------|--------|----------|--------|
| P19338 | TLVLSNLSYSATEETLQEVFEK                                                              | 2500.25 | 2500.26 | -0.01  | -5.01    | 2.E-15 |
| Q13151 | SGGGGGGGSSWGGRSNSGYPYRGGYGGGGGYGGSSF                                                | 3141.34 | 3113.30 | 28.04  | 8925.03  | 2.E-15 |
| A2BDF6 | STELLIRKLPFQRLVREIAQDFKTDLRFQSSAVMALQEASEAYL<br>VGLFEDTNLCAIHAKRVTIMPKDIQLARRIRGERA | 9006.92 | 9082.91 | -75.99 | -8436.67 | 2.E-15 |
| A2BDF6 | STELLIRKLPFQRLVREIAQDFKTDLRFQSSAVMALQEASEAYL<br>VGLFEDTNLCAIHAKRVTIMPKDIQLARRIRGERA | 9020.94 | 9082.91 | -61.97 | -6869.47 | 2.E-15 |
| P11142 | NQVAMNPTNTVFDK                                                                      | 1648.79 | 1648.79 | 0.00   | -1.70    | 2.E-15 |
| Q8IUE6 | TRIIPRHLQLAVRNDEELNK                                                                | 2414.35 | 2414.35 | 0.00   | -1.69    | 2.E-15 |
| P52272 | (41)AAGVEAAA EVAATEIKMEEESGAPGVPSGNGAPGPKGE<br>GERPAQNEK                            | 4585.15 | 4586.18 | -1.03  | -223.59  | 2.E-15 |
| P52272 | (41)AAGVEAAA EVAATEIKMEEESGAPGVPSGNGAPGPKGE<br>GERPAQNEK                            | 4587.16 | 4586.18 | 0.98   | 213.27   | 2.E-15 |
| P20700 | SLEGDLEDLKDQIAQLEASLAAKK                                                            | 2655.39 | 2655.40 | -0.01  | -1.97    | 2.E-15 |
| P47914 | AQAAAPASVPAQAPK                                                                     | 1372.72 | 1376.74 | -4.02  | -2928.54 | 2.E-15 |
| P47914 | AQAAAPASVPAQAPK                                                                     | 1376.74 | 1376.74 | 0.00   | 0.45     | 2.E-15 |
| P20700 | LREYEAALNSK                                                                         | 1293.67 | 1292.67 | 1.00   | 774.81   | 3.E-15 |
| Q15149 | ADSMIRLLFNDVQTLK                                                                    | 1862.99 | 1862.99 | 0.00   | -1.98    | 3.E-15 |
| Q9Y5B9 | YTEGVQSLNWTK                                                                        | 1424.69 | 1424.69 | 0.00   | -1.32    | 3.E-15 |
| P62906 | AVDIPHMDIEALKK                                                                      | 1578.84 | 1578.84 | 0.00   | -1.54    | 3.E-15 |

|        |                                     |         |         |       |          |        |
|--------|-------------------------------------|---------|---------|-------|----------|--------|
| P62805 | VFLENVIRDAVITYTEHAK                 | 2107.11 | 2104.10 | 3.01  | 1427.05  | 3.E-15 |
| P22626 | RGFGFVTFDDHDPVDK                    | 1850.86 | 1850.86 | 0.00  | -2.12    | 3.E-15 |
| P62841 | HGRPGIGATHSSRFIPLK                  | 1930.06 | 1930.06 | 0.00  | -2.39    | 3.E-15 |
| P11142 | SQIHDIVLVGGSTRIPK                   | 1815.95 | 1819.03 | -3.08 | -1697.54 | 3.E-15 |
| P11142 | SQIHDIVLVGGSTRIPK                   | 1819.03 | 1819.03 | 0.00  | 1.24     | 3.E-15 |
| P06748 | MSVQPTVSLGGFEITPPVLRK               | 2467.38 | 2467.39 | -0.01 | -2.72    | 3.E-15 |
| P46777 | NSVTPDMMEEMYKK                      | 1704.86 | 1701.74 | 3.12  | 1828.59  | 3.E-15 |
| P26599 | MALIQMGSVEEAVQALIDLHNHDLGENHHLRVFSK | 4038.01 | 4038.02 | -0.01 | -2.90    | 3.E-15 |
| Q02878 | PRHQEGEIFDTEK                       | 1579.84 | 1584.75 | -4.91 | -3107.46 | 4.E-15 |
| Q02878 | PRHQEGEIFDTEK                       | 1584.75 | 1584.75 | 0.00  | -1.71    | 4.E-15 |
| O75526 | YGRIVEVLLMK                         | 1319.74 | 1319.76 | -0.02 | -12.96   | 4.E-15 |
| O75526 | YGRIVEVLLMK                         | 1319.76 | 1319.76 | 0.00  | -1.06    | 4.E-15 |
| P19338 | FGYVDFESAEDLEKALELTGLK              | 2473.23 | 2473.23 | 0.00  | -1.73    | 4.E-15 |
| P33778 | RSTITSREIQTAVRLLLPGELAK             | 2594.48 | 2551.48 | 43.00 | 16573.60 | 4.E-15 |
| P0C0S8 | TRIIPRHLQLAIRNDEELNK                | 2428.36 | 2428.37 | -0.01 | -2.44    | 4.E-15 |

|        |                      |         |         |       |          |        |
|--------|----------------------|---------|---------|-------|----------|--------|
| P62081 | AQLRELNITAAK         | 1326.76 | 1326.76 | 0.00  | -1.07    | 4.E-15 |
| P62081 | AQLRELNITAAK         | 1328.70 | 1326.76 | 1.94  | 1462.53  | 4.E-15 |
| O75526 | YGRIVEVLLMK          | 1319.76 | 1319.76 | 0.00  | -0.31    | 5.E-15 |
| P62805 | TVTAMDVVYALK         | 1310.75 | 1309.70 | 1.05  | 797.45   | 5.E-15 |
| P62805 | TVTAMDVVYALK         | 1311.68 | 1309.70 | 1.98  | 1508.03  | 5.E-15 |
| P20700 | LREYEALNSK           | 1292.67 | 1292.67 | 0.00  | -0.03    | 5.E-15 |
| Q53F64 | IFVGGLNPEATEEK       | 1500.78 | 1502.76 | -1.98 | -1322.61 | 5.E-15 |
| Q53F64 | IFVGGLNPEATEEK       | 1502.76 | 1502.76 | 0.00  | -1.55    | 5.E-15 |
| Q53F64 | IFVGGLNPEATEEK       | 1504.76 | 1502.76 | 2.00  | 1332.01  | 5.E-15 |
| Q53F64 | IFVGGLNPEATEEK       | 1505.85 | 1502.76 | 3.09  | 2054.03  | 5.E-15 |
| P62988 | ESTLHLVLRIRGG        | 1449.84 | 1449.84 | 0.00  | -1.56    | 5.E-15 |
| P0C0S8 | TRIIPRHLQLAIRNDEELNK | 2430.33 | 2428.37 | 1.96  | 806.96   | 5.E-15 |
| P62805 | TVTAMDVVYALK         | 1309.68 | 1309.70 | -0.02 | -16.46   | 6.E-15 |
| P62805 | TVTAMDVVYALK         | 1309.70 | 1309.70 | 0.00  | -2.94    | 6.E-15 |
| P62805 | TVTAMDVVYALK         | 1309.74 | 1309.70 | 0.04  | 33.48    | 6.E-15 |

|        |                                                                                                   |         |         |       |          |        |
|--------|---------------------------------------------------------------------------------------------------|---------|---------|-------|----------|--------|
| P62805 | TVTAMDVVYALK                                                                                      | 1309.76 | 1309.70 | 0.06  | 42.56    | 6.E-15 |
| P62805 | TVTAMDVVYALK                                                                                      | 1312.69 | 1309.70 | 2.99  | 2281.46  | 6.E-15 |
| P06748 | MSVQPTVSLGGFEITPPVLRK                                                                             | 2467.38 | 2467.39 | -0.01 | -2.68    | 6.E-15 |
| P0C0S8 | TRIIPRHLQLAIRNDEELNK                                                                              | 2428.36 | 2428.37 | -0.01 | -2.61    | 6.E-15 |
| O75526 | YGRIVEVLLMK                                                                                       | 1323.65 | 1319.76 | 3.89  | 2941.62  | 6.E-15 |
| P0C0S8 | TRIIPRHLQLAIRNDEELNK                                                                              | 2428.33 | 2428.37 | -0.04 | -17.43   | 6.E-15 |
| P62805 | TVTAMDVVYALK                                                                                      | 1309.64 | 1309.70 | -0.06 | -42.65   | 6.E-15 |
| P62805 | TVTAMDVVYALK                                                                                      | 1309.66 | 1309.70 | -0.04 | -33.49   | 6.E-15 |
| P62805 | TVTAMDVVYALK                                                                                      | 1309.67 | 1309.70 | -0.03 | -25.01   | 6.E-15 |
| P14866 | RQRQPPLLDHPAEYGGPHGGYHSHYHDEGYGPPPPHYEG<br>RRMGPPVGGHRRGSPRYGPQYGHPPPPPPPEYGPADS<br>PVLMMVYGLDQSK | 9977.74 | 9977.75 | -0.01 | -0.95    | 7.E-15 |
| P07355 | GLGTDEDSLIEIICSRTNQELQEINRVYK                                                                     | 3335.67 | 3335.67 | 0.00  | -1.32    | 7.E-15 |
| P0C0S8 | VTIAQGGVLPNIQAVLLPK                                                                               | 1930.21 | 1930.16 | 0.05  | 24.10    | 7.E-15 |
| P62805 | TVTAMDVVYALKRQGRTLYGFGG                                                                           | 2497.55 | 2502.31 | -4.76 | -1905.86 | 7.E-15 |
| P62805 | TVTAMDVVYALKRQGRTLYGFGG                                                                           | 2502.31 | 2502.31 | 0.00  | -1.55    | 7.E-15 |
| P08758 | SIRSIPAYLAETLYYAMK                                                                                | 2089.09 | 2089.09 | 0.00  | -2.24    | 7.E-15 |

|        |                                                        |         |         |       |         |        |
|--------|--------------------------------------------------------|---------|---------|-------|---------|--------|
| P62805 | TVTAMDVVYALK                                           | 1314.67 | 1309.70 | 4.97  | 3778.80 | 7.E-15 |
| P16403 | (51)SETAPAAPAAAPPAEK                                   | 1519.71 | 1519.75 | -0.04 | -27.78  | 7.E-15 |
| P16403 | (51)SETAPAAPAAAPPAEK                                   | 1519.72 | 1519.75 | -0.03 | -17.98  | 7.E-15 |
| P16403 | (51)SETAPAAPAAAPPAEK                                   | 1519.75 | 1519.75 | 0.00  | -1.86   | 7.E-15 |
| P16403 | (51)SETAPAAPAAAPPAEK                                   | 1519.79 | 1519.75 | 0.04  | 28.74   | 7.E-15 |
| P05787 | TARSNMDNMFESYINNLRRQLETGQEK                            | 3357.61 | 3357.62 | -0.01 | -2.41   | 8.E-15 |
| Q01130 | (51)SYGRPPPDVEGMTSLKVDNLTYRTSPDLRRVFEK                 | 4066.05 | 4066.06 | -0.01 | -2.73   | 8.E-15 |
| P0C0S8 | VTIAQGGVLPNIQAVLLPK                                    | 1930.15 | 1930.16 | -0.01 | -4.19   | 8.E-15 |
| Q08211 | ETPFELIEALLKYIETLNVPGAVLVFLPGWNLIYTMQK                 | 4362.37 | 4362.36 | 0.01  | 2.37    | 8.E-15 |
| Q12906 | QGGYSQSNYNSPGSGQNYSGPPSSYQSSQGGYGRNADHS<br>MNYQYR      | 4882.04 | 4882.04 | 0.00  | 0.32    | 8.E-15 |
| Q7L4M3 | TTSGYAGGLSSAYGGLTSPGLSYSLSGSSFGSGAGSSSFRTS<br>SSRAVVVK | 4739.29 | 4739.30 | -0.01 | -3.11   | 9.E-15 |
| P16403 | ASGPPVSELITK                                           | 1201.64 | 1197.66 | 3.98  | 3309.17 | 9.E-15 |
| P35268 | ITVTSEVPFSK                                            | 1208.67 | 1206.65 | 2.02  | 1675.24 | 9.E-15 |
| P62736 | AGFAGDDAPRAVFPISVGRPRHQGVMVGMGQK                       | 3306.58 | 3307.68 | -1.10 | -332.40 | 9.E-15 |
| A2BDF6 | STELLIRKLPFQRLVREIAQDFK                                | 2799.60 | 2799.61 | -0.01 | -2.99   | 9.E-15 |



|        |                                                                                     |         |         |       |          |        |
|--------|-------------------------------------------------------------------------------------|---------|---------|-------|----------|--------|
| P33778 | RSTITSREIQTAVRLLLLPGELAK                                                            | 2551.37 | 2551.48 | -0.11 | -43.99   | 9.E-15 |
| P33778 | RSTITSREIQTAVRLLLLPGELAK                                                            | 2551.40 | 2551.48 | -0.08 | -30.74   | 9.E-15 |
| P05787 | TARSNMDNMFESYINNLRRQLETLGQEK                                                        | 3357.61 | 3357.62 | -0.01 | -2.26    | 1.E-14 |
| P62736 | AGFAGDDAPRAVFPSIVGRPRHQGVMVGMGQK                                                    | 3307.67 | 3307.68 | -0.01 | -2.12    | 1.E-14 |
| P62736 | AGFAGDDAPRAVFPSIVGRPRHQGVMVGMGQK                                                    | 3308.62 | 3307.68 | 0.94  | 284.80   | 1.E-14 |
| P33778 | RSTITSREIQTAVRLLLLPGELAK                                                            | 2551.47 | 2551.48 | -0.01 | -3.93    | 1.E-14 |
| P33778 | RSTITSREIQTAVRLLLLPGELAK                                                            | 2551.53 | 2551.48 | 0.05  | 19.98    | 1.E-14 |
| P33778 | RSTITSREIQTAVRLLLLPGELAK                                                            | 2551.56 | 2551.48 | 0.08  | 31.54    | 1.E-14 |
| P07355 | SALSGHLETVILGLLK                                                                    | 1649.97 | 1649.97 | 0.00  | -2.22    | 1.E-14 |
| A5PLR1 | STELLIRKLPFQRLVREIAQDFKTDLRFQSSAVMALQEACEAY<br>LVGLFEDTNLCAIHAKRVTIMPKDIQLARRIRGERA | 9097.92 | 9098.88 | -0.96 | -104.98  | 1.E-14 |
| P98179 | LFVGGLNFNTDEQALEDHFSSFGPISEVVVK                                                     | 3493.74 | 3493.74 | 0.00  | -1.37    | 1.E-14 |
| P07910 | LKGDDLQAIKK                                                                         | 1228.71 | 1227.72 | 0.99  | 803.16   | 1.E-14 |
| P05787 | TEISEMNRNISRLQAEIEGLK                                                               | 2427.10 | 2430.25 | -3.15 | -1298.73 | 1.E-14 |
| P05787 | TEISEMNRNISRLQAEIEGLK                                                               | 2430.24 | 2430.25 | -0.01 | -4.30    | 1.E-14 |
| P05787 | TEISEMNRNISRLQAEIEGLK                                                               | 2431.19 | 2430.25 | 0.94  | 387.61   | 1.E-14 |

|        |                                                              |         |         |        |          |        |
|--------|--------------------------------------------------------------|---------|---------|--------|----------|--------|
| P05787 | LSELEAALQRAK                                                 | 1327.75 | 1327.75 | 0.00   | -0.93    | 1.E-14 |
| P16403 | ASGPPVSELITK                                                 | 1198.66 | 1197.66 | 1.00   | 835.70   | 1.E-14 |
| P46087 | GADSELSTVPSVTK                                               | 1389.70 | 1389.70 | 0.00   | -0.95    | 1.E-14 |
| P26373 | STESLQANVQRLK                                                | 1472.79 | 1472.79 | 0.00   | -1.35    | 1.E-14 |
| P60709 | ILTERGYSFTTTAEREIVRDIK                                       | 2597.34 | 2597.38 | -0.04  | -14.35   | 2.E-14 |
| P60709 | ILTERGYSFTTTAEREIVRDIK                                       | 2597.38 | 2597.38 | 0.00   | -0.95    | 2.E-14 |
| O00422 | (41)AVESRVTQEEIK                                             | 1429.74 | 1429.74 | 0.00   | -1.11    | 2.E-14 |
| Q00839 | YNILGTNTIMDK                                                 | 1381.69 | 1381.69 | 0.00   | -0.39    | 2.E-14 |
| Q00839 | YNILGTNTIMDK                                                 | 1382.67 | 1381.69 | 0.98   | 710.55   | 2.E-14 |
| A5PLR1 | TDLRFQSSAVMALQEACEAYLVGLFEDTNLCAIHAKRVTIMPK<br>DIQLARRIRGERA | 6435.04 | 6317.28 | 117.76 | 18299.70 | 2.E-14 |
| P06748 | NCFRMTDQEIQLDWQWRK                                           | 2467.15 | 2467.15 | 0.00   | 1.30     | 2.E-14 |
| P06748 | NCFRMTDQEIQLDWQWRK                                           | 2467.14 | 2467.15 | -0.01  | -2.56    | 2.E-14 |
| P11387 | WWEEERYPEGIK                                                 | 1620.76 | 1620.76 | 0.00   | -0.20    | 2.E-14 |
| P62857 | (49)MDTSRVQPIK                                               | 1215.63 | 1215.63 | 0.00   | -1.06    | 2.E-14 |
| Q99880 | AMGIMNSFVNDIFERIASEASRLAHYNK                                 | 3179.56 | 3183.56 | -4.00  | -1259.24 | 2.E-14 |

|        |                              |         |         |       |         |        |
|--------|------------------------------|---------|---------|-------|---------|--------|
| P05387 | NIEDVIAQGIGK                 | 1255.68 | 1255.68 | 0.00  | -0.31   | 2.E-14 |
| P07910 | LKGDDLQAIKK                  | 1227.72 | 1227.72 | 0.00  | -0.78   | 2.E-14 |
| P04083 | QAWFIENEEQEYVQTVK            | 2140.00 | 2140.01 | -0.01 | -2.70   | 2.E-14 |
| P08865 | RKSDGIYIINLK                 | 1417.74 | 1418.82 | -1.08 | -759.39 | 2.E-14 |
| P08865 | RKSDGIYIINLK                 | 1418.82 | 1418.82 | 0.00  | -0.58   | 2.E-14 |
| Q99880 | AMGIMNSFVNDIFERIASEASRLAHYNK | 3183.55 | 3183.56 | -0.01 | -2.08   | 3.E-14 |
| O75526 | YGRIVEVLLMK                  | 1324.68 | 1319.76 | 4.92  | 3714.24 | 3.E-14 |
| P06748 | GGSLPKVEAKFINYVK             | 1748.98 | 1748.98 | 0.00  | 0.76    | 3.E-14 |
| P15880 | SPYQEFTDHLVK                 | 1462.71 | 1462.71 | 0.00  | -2.20   | 3.E-14 |
| Q53HU8 | NTRTNEKVELQELNDRFANYIDK      | 2809.40 | 2809.40 | 0.00  | -1.44   | 3.E-14 |
| P46777 | GAVDGGLSIPHSTK               | 1337.69 | 1337.69 | 0.00  | -0.52   | 3.E-14 |
| Q9H307 | (41)AVAVRTLQEQLEK            | 1525.85 | 1525.85 | 0.00  | -1.39   | 3.E-14 |
| P26599 | DYGNSPLHRFK                  | 1332.66 | 1332.66 | 0.00  | -0.57   | 3.E-14 |
| P26599 | DYGNSPLHRFK                  | 1336.70 | 1332.66 | 4.04  | 3023.82 | 3.E-14 |
| P62805 | VFLENVIRDAVITYTEHAK          | 2107.11 | 2104.10 | 3.01  | 1426.53 | 3.E-14 |

|        |                                                                           |         |         |       |          |        |
|--------|---------------------------------------------------------------------------|---------|---------|-------|----------|--------|
| P14866 | SERSSSGLLEWESK                                                            | 1591.57 | 1593.76 | -2.19 | -1374.45 | 3.E-14 |
| P08865 | RKSDGIYIINLK                                                              | 1414.76 | 1418.82 | -4.06 | -2869.12 | 3.E-14 |
| O75526 | YGRIVEVLLMK                                                               | 1319.74 | 1319.76 | -0.02 | -14.55   | 4.E-14 |
| O75526 | YGRIVEVLLMK                                                               | 1319.76 | 1319.76 | 0.00  | -0.99    | 4.E-14 |
| O75526 | YGRIVEVLLMK                                                               | 1320.75 | 1319.76 | 0.99  | 746.92   | 4.E-14 |
| P24928 | LLQFHVATMVDNELPGLPRAMQK                                                   | 2616.27 | 2607.37 | 8.90  | 3400.58  | 4.E-14 |
| P46777 | AHAAIRENPVYEK                                                             | 1495.80 | 1496.77 | -0.97 | -647.71  | 4.E-14 |
| P46777 | AHAAIRENPVYEK                                                             | 1496.74 | 1496.77 | -0.03 | -21.01   | 4.E-14 |
| P46777 | AHAAIRENPVYEK                                                             | 1496.74 | 1496.77 | -0.03 | -21.01   | 4.E-14 |
| P46777 | AHAAIRENPVYEK                                                             | 1496.77 | 1496.77 | 0.00  | -0.50    | 4.E-14 |
| P46777 | AHAAIRENPVYEK                                                             | 1499.78 | 1496.77 | 3.01  | 2006.39  | 4.E-14 |
| P07355 | LSLEGDHSTPPSAYGSVK                                                        | 1843.90 | 1843.90 | -0.01 | -2.70    | 4.E-14 |
| P11142 | EDIERMVQAEK                                                               | 1475.69 | 1475.69 | 0.00  | -1.28    | 4.E-14 |
| Q13435 | AAPPPMSAQLPGIPMPPPLGLPPLQPPPPPPPPPPGLGLGF<br>PMAHPPNLGPPPLRVGEPVALSEEERLK | 7206.84 | 7206.88 | -0.04 | -5.74    | 4.E-14 |
| P16403 | (51)SETAAPAAAPPAEK                                                        | 1519.72 | 1519.75 | -0.03 | -17.12   | 4.E-14 |

|        |                                                                              |         |         |       |          |        |
|--------|------------------------------------------------------------------------------|---------|---------|-------|----------|--------|
| P16403 | (51)SETAPAAPAAAPPAEK                                                         | 1519.75 | 1519.75 | 0.00  | -2.65    | 4.E-14 |
| P16403 | (51)SETAPAAPAAAPPAEK                                                         | 1519.78 | 1519.75 | 0.03  | 19.07    | 4.E-14 |
| Q7L4M3 | TTSYGAGGLSSAYGGLTSPGLSYSLGSSFGSGAGSSSFRTS<br>SSRAVVVK                        | 4739.31 | 4739.30 | 0.01  | 1.66     | 4.E-14 |
| Q6ZQN2 | FSMPGFKGEGPEVDVNLPKADIDVSGPKVDIDTPDIDIHGPE<br>GK                             | 4638.32 | 4631.27 | 7.05  | 1520.33  | 4.E-14 |
| P49755 | LKPLEVELRRLEDLSESIVNDFAYMK                                                   | 3106.63 | 3106.64 | -0.01 | -2.58    | 5.E-14 |
| P16403 | ASGPPVSELITK                                                                 | 1198.66 | 1197.66 | 1.00  | 836.70   | 5.E-14 |
| P16403 | (51)SETAPAAPAAAPPAEK                                                         | 1519.69 | 1519.75 | -0.06 | -37.92   | 5.E-14 |
| P16403 | (51)SETAPAAPAAAPPAEK                                                         | 1519.71 | 1519.75 | -0.04 | -28.18   | 5.E-14 |
| P16403 | (51)SETAPAAPAAAPPAEKAPVKK                                                    | 2043.10 | 2043.10 | 0.00  | 1.60     | 5.E-14 |
| P26599 | ELKTDSSPNQARAQAALQAVNSVQSGNLALAASAAAVDAGM<br>AMAGQSPVLRIIVENLFYPVTLDDLHQIFSK | 7475.89 | 7475.90 | -0.01 | -1.26    | 5.E-14 |
| P23396 | GGKPEPPAMPQPVPTA                                                             | 1572.80 | 1572.80 | 0.00  | -2.15    | 5.E-14 |
| P16403 | ASGPPVSELITK                                                                 | 1201.69 | 1197.66 | 4.03  | 3356.20  | 6.E-14 |
| P16403 | ASGPPVSELITK                                                                 | 1202.57 | 1197.66 | 4.91  | 4086.34  | 6.E-14 |
| P84090 | IYVLLRRQAQQAGK                                                               | 1640.78 | 1642.96 | -2.18 | -1326.00 | 6.E-14 |
| P84090 | IYVLLRRQAQQAGK                                                               | 1642.96 | 1642.96 | 0.00  | -1.63    | 6.E-14 |

|        |                                                                                     |         |         |        |          |        |
|--------|-------------------------------------------------------------------------------------|---------|---------|--------|----------|--------|
| P26599 | DYGNSPLHRFK                                                                         | 1332.66 | 1332.66 | 0.00   | -0.57    | 6.E-14 |
| P50995 | TPVLFDIYEIK                                                                         | 1335.78 | 1336.73 | -0.95  | -713.16  | 6.E-14 |
| P21796 | SRVTQSNFAVGYK                                                                       | 1455.75 | 1455.75 | 0.00   | 0.88     | 6.E-14 |
| P05787 | LSELEAALQRAK                                                                        | 1327.75 | 1327.75 | 0.00   | -0.70    | 6.E-14 |
| P09651 | LFIGGLSFETTDESLRSHFEQWGTLDCVVMRDPNTK                                                | 4229.02 | 4229.02 | 0.00   | -1.09    | 7.E-14 |
| P09651 | LFIGGLSFETTDESLRSHFEQWGTLDCVVMRDPNTK                                                | 4229.16 | 4229.02 | 0.14   | 33.41    | 7.E-14 |
| P16403 | ASGPPVSELITK                                                                        | 1198.66 | 1197.66 | 1.00   | 838.37   | 7.E-14 |
| Q04695 | EPVTTRQVRTIVEEVQDGK                                                                 | 2183.15 | 2183.15 | 0.00   | -0.54    | 7.E-14 |
| Q16891 | TDHPEIGEGKPTPALSEEASSSSIRERPPEEVAARLAQKEK                                           | 4426.19 | 4426.20 | -0.01  | -1.19    | 7.E-14 |
| O95926 | (41)AAIAASEVLVDSAEEGSLAAAELAAQK                                                     | 2697.36 | 2697.37 | -0.01  | -2.05    | 8.E-14 |
| Q16695 | KPHRYRPGTVALREIRRYQK                                                                | 2523.44 | 2523.44 | 0.00   | -1.22    | 8.E-14 |
| A2BDF6 | STELLIRKLPFQRLVREIAQDFKTDLRFQSSAVMALQEASEAYL<br>VGLFEDTNLCAIHAKRVTIMPKDIQLARRIRGERA | 9006.88 | 9082.91 | -76.03 | -8441.42 | 8.E-14 |
| A2BDF6 | STELLIRKLPFQRLVREIAQDFKTDLRFQSSAVMALQEASEAYL<br>VGLFEDTNLCAIHAKRVTIMPKDIQLARRIRGERA | 9020.93 | 9082.91 | -61.98 | -6870.70 | 8.E-14 |
| P51991 | RAVSREDSVKPGAHLTVK                                                                  | 1949.09 | 1949.08 | 0.01   | 7.53     | 8.E-14 |
| Q13247 | DFMRQAGEVTYADAHK                                                                    | 1843.87 | 1837.84 | 6.03   | 3268.72  | 8.E-14 |



|        |                                                                                     |         |         |        |          |        |
|--------|-------------------------------------------------------------------------------------|---------|---------|--------|----------|--------|
| A2BDF6 | STELLIRKLPFQRLVREIAQDFKTDLRFQSSAVMALQEASEAYL<br>VGLFEDTNLCAIHAK                     | 6898.52 | 6722.54 | 175.98 | 25510.10 | 2.E-13 |
| P07910 | LKGDDLQAIKK                                                                         | 1228.72 | 1227.72 | 1.00   | 815.60   | 2.E-13 |
| P46087 | ELLLSAIDSVNATSK                                                                     | 1560.67 | 1559.84 | 0.83   | 531.87   | 2.E-13 |
| P20700 | LREYEAALNSK                                                                         | 1292.67 | 1292.67 | 0.00   | -0.19    | 2.E-13 |
| P04083 | VLDLELKGDIK                                                                         | 1370.77 | 1370.77 | 0.00   | -1.06    | 2.E-13 |
| P22626 | KRGFGFVTFDDHDPVDK                                                                   | 1978.95 | 1978.95 | 0.00   | -1.60    | 2.E-13 |
| A2BDF6 | STELLIRKLPFQRLVREIAQDFKTDLRFQSSAVMALQEASEAYL<br>VGLFEDTNLCAIHAKRVTIMPKDIQLARRIRGERA | 9006.91 | 9082.91 | -76.00 | -8438.11 | 2.E-13 |
| A2BDF6 | STELLIRKLPFQRLVREIAQDFKTDLRFQSSAVMALQEASEAYL<br>VGLFEDTNLCAIHAKRVTIMPKDIQLARRIRGERA | 9019.92 | 9082.91 | -62.99 | -6983.09 | 2.E-13 |
| P19338 | KMAPPPKEVEEEDSEDEEMSEDEEDDSSGEEVVIPQK                                               | 4061.71 | 4061.73 | -0.02  | -3.99    | 2.E-13 |
| Q99880 | AMGIMNSFVNDIFERIASEASRLAHYNK                                                        | 3179.56 | 3183.56 | -4.00  | -1258.58 | 2.E-13 |
| P62854 | FVIRNIVEAAVRDISEASVFDAYVLPK                                                         | 3091.66 | 3091.67 | -0.01  | -2.57    | 2.E-13 |
| P25815 | MTELETAMGMIIDVFSRYSGSEGSTQTLTK                                                      | 3282.54 | 3282.55 | -0.01  | -3.01    | 2.E-13 |
| P04083 | VLDLELKGDIK                                                                         | 1370.77 | 1370.77 | 0.00   | -1.50    | 2.E-13 |
| P62304 | GDNITLLQSVSN                                                                        | 1259.64 | 1259.64 | 0.00   | -0.82    | 3.E-13 |
| Q00839 | EKPYFPIPEEYTFIQNVPLEDRVRGPK                                                         | 3260.68 | 3260.69 | -0.01  | -2.13    | 3.E-13 |



|        |                                                                                     |         |         |        |          |        |
|--------|-------------------------------------------------------------------------------------|---------|---------|--------|----------|--------|
| P18077 | IEGVYARDETEFYLGK                                                                    | 1888.92 | 1888.92 | 0.00   | -1.99    | 3.E-13 |
| A2BDF6 | STELLIRKLPFQRLVREIAQDFKTDLRFQSSAVMALQEASEAYL<br>VGLFEDTNLCAIHAKRVTIMPKDIQLARRIRGERA | 9006.93 | 9082.91 | -75.98 | -8436.27 | 3.E-13 |
| A2BDF6 | STELLIRKLPFQRLVREIAQDFKTDLRFQSSAVMALQEASEAYL<br>VGLFEDTNLCAIHAKRVTIMPKDIQLARRIRGERA | 9020.94 | 9082.91 | -61.97 | -6870.04 | 3.E-13 |
| P84090 | (51)SHTILLVQPTK                                                                     | 1277.73 | 1277.73 | 0.00   | -0.90    | 3.E-13 |
| P25398 | (41)AEEGIAAGGVMDVNTALQEVLK                                                          | 2256.14 | 2256.13 | 0.01   | 2.91     | 3.E-13 |
| P33778 | AMGIMNSFVNDIFERIAGEASRLAHYNK                                                        | 3169.54 | 3153.55 | 15.99  | 5043.65  | 3.E-13 |
| P61978 | (49)METEQPEETFPNTETNGEFGKRP AEDMEEEQAFK                                             | 4017.71 | 4016.72 | 0.99   | 246.21   | 3.E-13 |
| P07910 | (41)ASNVTNKTDPRSMNSRVFIGNLNLTLLVK                                                   | 3116.63 | 3116.64 | -0.01  | -2.08    | 3.E-13 |
| P07910 | (41)ASNVTNKTDPRSMNSRVFIGNLNLTLLVK                                                   | 3117.57 | 3116.64 | 0.93   | 299.15   | 3.E-13 |
| P52272 | (41)AAGVEAAA EVAATEIKMEEESGAPGVPSGNGAPGPKGE<br>GERPAQNEK                            | 4587.17 | 4586.18 | 0.99   | 216.34   | 3.E-13 |
| Q99880 | AMGIMNSFVNDIFERIASEASRLAHYNK                                                        | 3183.55 | 3183.56 | -0.01  | -1.99    | 4.E-13 |
| P25398 | (41)AEEGIAAGGVMDVNTALQEVLK                                                          | 2256.13 | 2256.13 | 0.00   | -1.75    | 4.E-13 |
| P60709 | DLYANTVLSGGTTMYPGIADRMQK                                                            | 2597.38 | 2601.26 | -3.88  | -1494.08 | 4.E-13 |
| P62857 | (49)MDTSRVQPIK                                                                      | 1214.65 | 1215.63 | -0.98  | -805.49  | 4.E-13 |
| P62857 | (49)MDTSRVQPIK                                                                      | 1215.63 | 1215.63 | 0.00   | -0.97    | 4.E-13 |

|        |                                     |         |         |       |         |        |
|--------|-------------------------------------|---------|---------|-------|---------|--------|
| P22626 | KRGFGFVTFDDHDPVDK                   | 1982.94 | 1978.95 | 3.99  | 2011.67 | 4.E-13 |
| P08729 | QEELEAALQRAK                        | 1384.73 | 1384.73 | 0.00  | -1.02   | 4.E-13 |
| P0C0S8 | VTIAQGGVLPNIQAVLLPK                 | 1930.16 | 1930.16 | 0.00  | 1.10    | 4.E-13 |
| P16403 | ERSGVSLAALKK                        | 1257.72 | 1257.74 | -0.02 | -14.28  | 4.E-13 |
| Q92879 | EGPEGANLFIYHLPQEFQDQLLQMFMPFGNVVSAK | 4037.91 | 4037.93 | -0.02 | -5.97   | 4.E-13 |
| P39019 | SVARRVLQALEGLK                      | 1538.93 | 1538.93 | 0.00  | -0.93   | 5.E-13 |
| P33778 | AMGIMNSFVNDIFERIAGEASRLAHYNK        | 3169.54 | 3153.55 | 15.99 | 5044.38 | 5.E-13 |
| P07355 | AYTNFDAERDALNIETAIK                 | 2154.06 | 2154.06 | 0.00  | -0.96   | 5.E-13 |
| P16403 | ERSGVSLAALKK                        | 1257.74 | 1257.74 | 0.00  | -1.40   | 5.E-13 |
| P08729 | QEELEAALQRAK                        | 1384.71 | 1384.73 | -0.02 | -15.61  | 5.E-13 |
| P08729 | QEELEAALQRAK                        | 1388.64 | 1384.73 | 3.91  | 2812.75 | 5.E-13 |
| Q00839 | EVLAGRPLFPVHLCHNCAVEFNFGQK          | 2922.44 | 2924.46 | -2.02 | -692.25 | 5.E-13 |
| P25398 | (41)AEEGIAAGGVMVNTALQEVLK           | 2256.13 | 2256.13 | 0.00  | 1.04    | 5.E-13 |
| P25398 | (41)AEEGIAAGGVMVNTALQEVLK           | 2257.86 | 2256.13 | 1.73  | 765.88  | 5.E-13 |
| P62750 | AYVRLAPDYDALDVANK                   | 1892.96 | 1892.96 | 0.00  | -2.00   | 6.E-13 |

|        |                            |         |         |       |         |        |
|--------|----------------------------|---------|---------|-------|---------|--------|
| P02545 | NIYSEELRETK                | 1380.69 | 1380.69 | 0.00  | -1.37   | 6.E-13 |
| P60709 | DLYANTVLSGGTTMYPGIADRMQK   | 2601.25 | 2601.26 | -0.01 | -3.61   | 6.E-13 |
| P25398 | (41)AEEGIAAGGVMDVNTALQEVLK | 2259.59 | 2256.13 | 3.46  | 1530.79 | 7.E-13 |
| Q04695 | ATMQNLNDRLASYLDK           | 1850.85 | 1851.91 | -1.06 | -571.94 | 7.E-13 |
| Q04695 | ATMQNLNDRLASYLDK           | 1851.91 | 1851.91 | 0.00  | -1.83   | 7.E-13 |
| Q04695 | ATMQNLNDRLASYLDK           | 1854.84 | 1851.91 | 2.93  | 1579.92 | 7.E-13 |
| Q9Y277 | AADFQLHTHVNDGTEFGGSIYQK    | 2533.35 | 2534.18 | -0.83 | -327.74 | 7.E-13 |
| Q9Y277 | AADFQLHTHVNDGTEFGGSIYQK    | 2533.40 | 2534.18 | -0.78 | -307.40 | 7.E-13 |
| Q9Y277 | AADFQLHTHVNDGTEFGGSIYQK    | 2534.18 | 2534.18 | 0.00  | -1.17   | 7.E-13 |
| P60709 | DLYANTVLSGGTTMYPGIADRMQK   | 2601.19 | 2601.26 | -0.07 | -28.60  | 7.E-13 |
| Q09666 | GSEVGFHGAAPDISVK           | 1569.78 | 1569.78 | 0.00  | -1.77   | 7.E-13 |
| Q09666 | GSEVGFHGAAPDISVK           | 1572.79 | 1569.78 | 3.01  | 1916.86 | 7.E-13 |
| P39019 | SVARRVLQALEGLK             | 1541.80 | 1538.93 | 2.87  | 1858.99 | 7.E-13 |
| P62701 | GIPHLVTHDARTIRYPDPLIK      | 2411.34 | 2411.34 | 0.00  | -1.53   | 7.E-13 |
| P62701 | GIPHLVTHDARTIRYPDPLIK      | 2412.30 | 2411.34 | 0.96  | 396.06  | 7.E-13 |

|        |                                                      |         |         |       |          |        |
|--------|------------------------------------------------------|---------|---------|-------|----------|--------|
| Q04695 | ATMQNLNDRASYLDK                                      | 1854.05 | 1851.91 | 2.14  | 1154.07  | 8.E-13 |
| P25398 | (41)AEEGIAAGGVMDVNTALQEVLK                           | 2252.69 | 2256.13 | -3.44 | -1528.77 | 8.E-13 |
| P25398 | (41)AEEGIAAGGVMDVNTALQEVLK                           | 2254.41 | 2256.13 | -1.72 | -763.50  | 8.E-13 |
| P33778 | AMGIMNSFVNDIFERIAGEASRLAHYNK                         | 3176.51 | 3153.55 | 22.96 | 7226.70  | 9.E-13 |
| P05783 | YWSQQIEESTTVVTTQSAEVGAAETTLTELRRTVQSLEIDLDS<br>MRNLK | 5426.57 | 5426.72 | -0.15 | -28.01   | 9.E-13 |
| P05783 | YWSQQIEESTTVVTTQSAEVGAAETTLTELRRTVQSLEIDLDS<br>MRNLK | 5426.73 | 5426.72 | 0.01  | 2.45     | 9.E-13 |
| P16403 | ASGPPVSELITK                                         | 1198.64 | 1197.66 | 0.98  | 814.78   | 1.E-12 |
| P16403 | ASGPPVSELITK                                         | 1198.65 | 1197.66 | 0.99  | 822.53   | 1.E-12 |
| P16403 | ASGPPVSELITK                                         | 1198.66 | 1197.66 | 1.00  | 834.79   | 1.E-12 |
| P39019 | DVNQQEFVRALAAFLK                                     | 1847.98 | 1847.99 | -0.01 | -2.84    | 1.E-12 |
| P39019 | DVNQQEFVRALAAFLK                                     | 1851.00 | 1847.99 | 3.01  | 1627.58  | 1.E-12 |
| P20700 | HETRLVEVDSGRQIEYEYK                                  | 2350.16 | 2350.16 | 0.00  | -0.81    | 1.E-12 |
| P69905 | VGAHAGEYGAEALERMFLSFPTTK                             | 2581.26 | 2581.26 | 0.00  | -1.30    | 2.E-12 |
| P16403 | (51)SETAPAAPAAAPPAEK                                 | 1519.69 | 1519.75 | -0.06 | -37.92   | 2.E-12 |
| P16403 | (51)SETAPAAPAAAPPAEK                                 | 1519.71 | 1519.75 | -0.04 | -28.18   | 2.E-12 |

|        |                                       |         |         |       |        |        |
|--------|---------------------------------------|---------|---------|-------|--------|--------|
| P16403 | (51)SETAPAAPAAAPPAEK                  | 1519.72 | 1519.75 | -0.03 | -17.12 | 2.E-12 |
| P16403 | (51)SETAPAAPAAAPPAEK                  | 1519.75 | 1519.75 | 0.00  | -2.65  | 2.E-12 |
| P16403 | (51)SETAPAAPAAAPPAEK                  | 1519.78 | 1519.75 | 0.03  | 19.07  | 2.E-12 |
| P02545 | NIYSEELRETK                           | 1380.69 | 1380.69 | 0.00  | -1.23  | 2.E-12 |
| P39019 | DVNQQEFVRLAAFLK                       | 1847.99 | 1847.99 | 0.00  | -2.30  | 2.E-12 |
| P39019 | DVNQQEFVRLAAFLK                       | 1848.89 | 1847.99 | 0.90  | 489.30 | 2.E-12 |
| P06748 | MSVQPTVSLGGFEITPPVLRK                 | 2467.38 | 2467.39 | -0.01 | -3.12  | 2.E-12 |
| P60709 | IWHHTFYNELRVAPEEHPVLLTEAPLNPK         | 3449.78 | 3449.79 | -0.01 | -2.69  | 2.E-12 |
| P60709 | IWHHTFYNELRVAPEEHPVLLTEAPLNPK         | 3450.73 | 3449.79 | 0.94  | 273.49 | 2.E-12 |
| Q15427 | LLYDTFSAFGVILQTPK                     | 1912.03 | 1912.03 | 0.00  | -0.45  | 2.E-12 |
| P05783 | VKLEAEIATYRRLLLEDGEDFNLDALDSSNSMQTIQK | 4169.05 | 4169.06 | -0.02 | -3.60  | 2.E-12 |
| P43243 | KRGAPPSSNIEDFHGLLPK                   | 2062.10 | 2062.10 | 0.00  | 0.04   | 2.E-12 |
| Q12905 | RNQDLAPNSAEQASILSLVTK                 | 2254.19 | 2254.19 | 0.00  | -0.80  | 2.E-12 |
| Q16695 | KPHRYRPGTVALREIRRYQK                  | 2523.44 | 2523.44 | 0.00  | -0.90  | 3.E-12 |
| Q9Y5B9 | YTEGVQSLNWTK                          | 1424.69 | 1424.69 | 0.00  | -1.46  | 3.E-12 |

|        |                                        |         |         |       |          |        |
|--------|----------------------------------------|---------|---------|-------|----------|--------|
| P11387 | AVQRLEEQLMK                            | 1341.65 | 1343.72 | -2.07 | -1540.34 | 3.E-12 |
| P11387 | AVQRLEEQLMK                            | 1343.70 | 1343.72 | -0.02 | -14.89   | 3.E-12 |
| P07355 | SALSGHLETVILGLLK                       | 1649.97 | 1649.97 | 0.00  | -2.77    | 3.E-12 |
| Q16695 | KPHRYRPGTVALREIRRYQK                   | 2523.44 | 2523.44 | 0.00  | -1.34    | 3.E-12 |
| Q16695 | KPHRYRPGTVALREIRRYQK                   | 2524.40 | 2523.44 | 0.96  | 379.94   | 3.E-12 |
| P08758 | TLFGRDLLDDLK                           | 1404.74 | 1404.76 | -0.02 | -14.41   | 4.E-12 |
| P08758 | TLFGRDLLDDLK                           | 1404.76 | 1404.76 | 0.00  | -1.46    | 4.E-12 |
| P08758 | TLFGRDLLDDLK                           | 1408.83 | 1404.76 | 4.07  | 2886.20  | 4.E-12 |
| P02545 | NIYSEELRETK                            | 1380.69 | 1380.69 | 0.00  | -0.58    | 4.E-12 |
| P11387 | AVQRLEEQLMK                            | 1343.72 | 1343.72 | 0.00  | -0.52    | 4.E-12 |
| P11387 | AVQRLEEQLMK                            | 1346.67 | 1343.72 | 2.95  | 2190.73  | 4.E-12 |
| P25205 | (41)AGTVVLDDELREAQRDYLDLDFLDEEDQGIYQSK | 3985.86 | 3985.87 | -0.01 | -1.90    | 4.E-12 |
| P16402 | RKASGPPVSELITK                         | 1481.86 | 1481.86 | 0.00  | 1.05     | 4.E-12 |
| P16402 | RKASGPPVSELITK                         | 1484.84 | 1481.86 | 2.98  | 2007.13  | 4.E-12 |
| Q00839 | GNFTLPEVAECFDEITYVELQK                 | 2544.21 | 2544.21 | 0.00  | -1.76    | 4.E-12 |

|        |                                                                                    |         |         |       |          |        |
|--------|------------------------------------------------------------------------------------|---------|---------|-------|----------|--------|
| P62158 | (41)ADQLTEEQIAEFKEAFSLFDKDGDTITTKELGTVMRSLG<br>QNPTEAELQDMINEVDADGNGTIDFPEFLTMMARK | 8353.95 | 8353.95 | 0.00  | 0.06     | 4.E-12 |
| P62273 | GHQQLYWSHPRK                                                                       | 1535.77 | 1535.77 | 0.00  | -1.74    | 5.E-12 |
| P52272 | (41)AAGVEAAAEEVAATEIKMEEESGAPGVPSGNGAPGPKGE<br>GERPAQNEK                           | 4587.18 | 4586.18 | 1.00  | 217.89   | 5.E-12 |
| Q00839 | GNFTLPEVAECFDEITYVELQK                                                             | 2544.20 | 2544.21 | -0.01 | -2.58    | 5.E-12 |
| P20700 | LLEGEERLK                                                                          | 1214.63 | 1214.65 | -0.02 | -13.78   | 5.E-12 |
| P20700 | LLEGEERLK                                                                          | 1214.65 | 1214.65 | 0.00  | -0.93    | 5.E-12 |
| P20700 | LLEGEERLK                                                                          | 1216.60 | 1214.65 | 1.95  | 1605.51  | 5.E-12 |
| Q00839 | YNILGTNTIMDK                                                                       | 1381.67 | 1381.69 | -0.02 | -14.07   | 5.E-12 |
| Q00839 | YNILGTNTIMDK                                                                       | 1381.69 | 1381.69 | 0.00  | -0.39    | 5.E-12 |
| Q562M3 | IWHHTFYNELRVAPEEHPVLLTQAPLNPK                                                      | 3444.71 | 3448.80 | -4.09 | -1187.72 | 6.E-12 |
| P60709 | RGILTLKYPIE(317)HGIVTNWDDMEK                                                       | 2741.42 | 2741.42 | 0.00  | -1.23    | 6.E-12 |
| P07355 | GVDEVTIVNILTNRNSNAQRQDIAFAYQRRTK                                                   | 3575.82 | 3575.89 | -0.07 | -18.75   | 6.E-12 |
| P07355 | GVDEVTIVNILTNRNSNAQRQDIAFAYQRRTK                                                   | 3575.89 | 3575.89 | 0.00  | 0.16     | 6.E-12 |
| Q12906 | AEPQAMNALMRLNQLKPLQYK                                                              | 2610.38 | 2610.38 | 0.00  | -1.80    | 6.E-12 |
| P62072 | KLTELSMQDEELMK                                                                     | 1701.74 | 1693.83 | 7.91  | 4649.04  | 6.E-12 |

|        |                                |         |         |       |          |        |
|--------|--------------------------------|---------|---------|-------|----------|--------|
| P62072 | KLTELSMQDEELMK                 | 1704.85 | 1693.83 | 11.02 | 6465.18  | 6.E-12 |
| P05386 | (41)ASVSELACIYSALILHDDEVTVTEDK | 2862.37 | 2862.38 | -0.01 | -2.05    | 6.E-12 |
| P24928 | LLQFHVATMVDNELPGLPRAMQK        | 2616.27 | 2607.37 | 8.90  | 3400.04  | 7.E-12 |
| O76021 | SAALPIFSSFVSNWDEATK            | 2069.01 | 2069.01 | -0.01 | -2.43    | 7.E-12 |
| P0C0S8 | TRIIPRHLQLAIRNDEELNK           | 2428.36 | 2428.37 | -0.01 | -2.98    | 7.E-12 |
| P07355 | WISIMTERSVPHLQK                | 1823.97 | 1823.97 | 0.00  | -1.98    | 7.E-12 |
| P15880 | SPYQEFTDHLVK                   | 1457.88 | 1462.71 | -4.83 | -3312.98 | 8.E-12 |
| P15880 | SPYQEFTDHLVK                   | 1462.71 | 1462.71 | 0.00  | -1.73    | 8.E-12 |
| P0C0S8 | TRIIPRHLQLAIRNDEELNK           | 2429.31 | 2428.37 | 0.94  | 386.60   | 8.E-12 |
| A2BDF6 | STELLIRKLPFQRLVREIAQDFK        | 2799.60 | 2799.61 | -0.01 | -2.06    | 8.E-12 |
| P84090 | (51)SHTILLVQPTK                | 1277.73 | 1277.73 | 0.00  | -0.20    | 8.E-12 |
| Q16695 | KPHRYRPGTVALREIRRYQK           | 2523.44 | 2523.44 | 0.00  | -0.90    | 9.E-12 |
| Q16695 | KPHRYRPGTVALREIRRYQK           | 2524.41 | 2523.44 | 0.97  | 382.48   | 9.E-12 |
| P35268 | FTLDCTHPVEDGIMDAANFEQFLQERIK   | 3266.54 | 3266.54 | 0.00  | -1.22    | 9.E-12 |
| P12956 | IQVTPPGFQLVFLPFADDK            | 2131.14 | 2131.14 | 0.00  | 1.82     | 9.E-12 |



|        |                                                        |         |         |       |          |        |
|--------|--------------------------------------------------------|---------|---------|-------|----------|--------|
| P63244 | (52)TEQMTLRGTLK                                        | 1318.69 | 1318.69 | 0.00  | 1.05     | 1.E-11 |
| P16403 | ASGPPVSELITK                                           | 1198.66 | 1197.66 | 1.00  | 836.79   | 1.E-11 |
| Q12906 | RFVMEVEVDGQK                                           | 1433.74 | 1435.71 | -1.97 | -1374.11 | 1.E-11 |
| Q12906 | RFVMEVEVDGQK                                           | 1435.71 | 1435.71 | 0.00  | -1.13    | 1.E-11 |
| Q12906 | RFVMEVEVDGQK                                           | 1438.67 | 1435.71 | 2.96  | 2056.81  | 1.E-11 |
| Q00839 | LKVSELKEELK                                            | 1314.78 | 1314.78 | 0.00  | 0.81     | 1.E-11 |
| P26447 | ALDVMVSTFHK                                            | 1246.62 | 1246.64 | -0.02 | -12.33   | 1.E-11 |
| P26447 | ALDVMVSTFHK                                            | 1246.62 | 1246.64 | -0.02 | -12.33   | 1.E-11 |
| P26447 | ALDVMVSTFHK                                            | 1246.64 | 1246.64 | 0.00  | -0.94    | 1.E-11 |
| P19338 | VFGNEIKLEKPK                                           | 1400.80 | 1400.80 | 0.00  | -1.51    | 1.E-11 |
| P05387 | MRYVASYLLAALGGNSSPSAKDIKK                              | 2639.41 | 2639.41 | 0.00  | 1.57     | 1.E-11 |
| Q14980 | LADDLSTLQEK                                            | 1231.63 | 1231.63 | 0.00  | -0.47    | 1.E-11 |
| P08729 | VDALNDEINFLRTLNETELTELQSQISDTSVLSMDNSRSLDL<br>DGIIAEVK | 5662.83 | 5662.84 | -0.01 | -1.39    | 2.E-11 |
| Q99848 | GFSDKLDFLEGDQK                                         | 1599.81 | 1597.76 | 2.05  | 1279.11  | 2.E-11 |
| P47914 | GVSRLKDLRLAYIAHPK                                      | 1822.88 | 1823.05 | -0.17 | -92.13   | 2.E-11 |

|        |                                                      |         |         |       |          |        |
|--------|------------------------------------------------------|---------|---------|-------|----------|--------|
| P47914 | GVSRLDRLAYIAHPK                                      | 1823.05 | 1823.05 | 0.00  | -2.11    | 2.E-11 |
| P19338 | KMAPPPKEVEEDESEDEEMSEDEEDD(37)S(37)SGEEVIPQK         | 4221.66 | 4221.66 | 0.00  | 0.26     | 2.E-11 |
| P62805 | VFLENVIRDAVITYTEHAK                                  | 2147.10 | 2104.10 | 43.00 | 20027.80 | 2.E-11 |
| P98179 | LFVGGLNFNTDEQALEDHFSSFGPISEVVVVK                     | 3493.74 | 3493.74 | 0.00  | 0.44     | 2.E-11 |
| P62244 | HGYIGEFEIIDDHRAGK                                    | 1955.95 | 1955.95 | 0.00  | -0.42    | 2.E-11 |
| P62750 | AYVRLAPDYDALDVANKIGII                                | 2289.24 | 2289.24 | 0.00  | 1.87     | 2.E-11 |
| P68431 | DIQLARRIGERA                                         | 1548.61 | 1552.89 | -4.28 | -2760.97 | 2.E-11 |
| Q71UI9 | RITPRHLQLAIRGDEELDSLIIK                              | 2572.44 | 2572.44 | 0.00  | -0.57    | 2.E-11 |
| P20700 | EELRELNDR LAVYIDK                                    | 1978.95 | 1975.04 | 3.91  | 1977.96  | 2.E-11 |
| Q92841 | KWDLSEL PKFEK                                        | 1526.81 | 1518.81 | 8.00  | 5236.43  | 2.E-11 |
| P05783 | YWSQQIEESTTVVTTQSAEVGAAETTLTELRRTVQSLEIDLDS<br>MRNLK | 5426.73 | 5426.72 | 0.01  | 2.71     | 2.E-11 |
| P61254 | FNPFVTSDRSK                                          | 1299.68 | 1296.65 | 3.03  | 2330.40  | 2.E-11 |
| P61254 | FNPFVTSDRSK                                          | 1299.74 | 1296.65 | 3.09  | 2374.46  | 2.E-11 |
| P68431 | DIQLARRIGERA                                         | 1553.87 | 1552.89 | 0.98  | 627.61   | 2.E-11 |
| P62805 | RISGLIYEETRGVLK                                      | 1732.97 | 1732.98 | -0.01 | -3.48    | 2.E-11 |

|        |                                                                  |         |         |        |          |        |
|--------|------------------------------------------------------------------|---------|---------|--------|----------|--------|
| Q71UI9 | RITPRHLQLAIRGDEELDSLK                                            | 2572.40 | 2572.44 | -0.04  | -17.40   | 2.E-11 |
| P19338 | FGYVDFESAEDLEKALELTGLK                                           | 2471.41 | 2473.23 | -1.82  | -737.67  | 2.E-11 |
| P68431 | DIQLARRIRGERA                                                    | 1552.89 | 1552.89 | 0.00   | -2.30    | 2.E-11 |
| P10412 | (51)SETAPAAPAAPAPAEKTPVKK                                        | 2073.11 | 2073.11 | 0.00   | 1.11     | 2.E-11 |
| P20700 | EELRELNDR LAVYIDK                                                | 1975.04 | 1975.04 | 0.00   | -1.02    | 2.E-11 |
| P18621 | VRYSLDAPENPTK                                                    | 1421.76 | 1417.72 | 4.04   | 2840.69  | 2.E-11 |
| P61254 | FNPFVTSDRSK                                                      | 1296.63 | 1296.65 | -0.02  | -14.22   | 2.E-11 |
| P61254 | FNPFVTSDRSK                                                      | 1296.65 | 1296.65 | 0.00   | -0.41    | 2.E-11 |
| P08729 | QDMARQLREYQELMSVK                                                | 2124.05 | 2124.05 | 0.00   | -0.04    | 3.E-11 |
| A2BDF6 | STELLIRKLPFQRLVREIAQDFKTDLRFQSSAVMALQEASEAYL<br>VGLFEDTNLCAIHAKE | 6856.51 | 6722.54 | 133.97 | 19539.50 | 3.E-11 |
| P60903 | EFPGFLENQKDPLAVDK                                                | 1945.98 | 1945.98 | 0.00   | -0.82    | 3.E-11 |
| P60903 | EFPGFLENQKDPLAVDK                                                | 1946.44 | 1945.98 | 0.46   | 238.85   | 3.E-11 |
| P11387 | WWEEERYPEGIK                                                     | 1620.76 | 1620.76 | 0.00   | -0.26    | 3.E-11 |
| P33778 | AMGIMNSFVNDIFERIAGEASRLAHYNK                                     | 3157.48 | 3153.55 | 3.93   | 1245.31  | 3.E-11 |
| P19338 | FGYVDFESAEDLEKALELTGLK                                           | 2474.18 | 2473.23 | 0.95   | 385.59   | 3.E-11 |

|        |                                    |         |         |       |          |        |
|--------|------------------------------------|---------|---------|-------|----------|--------|
| P20700 | ALYETELADARRALDDTARERAK            | 2633.34 | 2633.35 | -0.01 | -2.16    | 3.E-11 |
| P33778 | AMGIMNSFVNDIFERIAGEASRLAHYNK       | 3153.43 | 3153.55 | -0.12 | -38.01   | 3.E-11 |
| P33778 | AMGIMNSFVNDIFERIAGEASRLAHYNK       | 3153.54 | 3153.55 | -0.01 | -3.92    | 3.E-11 |
| Q13123 | FAGSAGWEGTESLK                     | 1440.80 | 1438.67 | 2.13  | 1478.67  | 3.E-11 |
| P63244 | (52)TEQMTRLRGTLK                   | 1318.69 | 1318.69 | 0.00  | 0.90     | 4.E-11 |
| P11387 | WWEEERYPEGIK                       | 1624.81 | 1620.76 | 4.05  | 2494.61  | 4.E-11 |
| Q9NWH9 | (41)AAATGAVAASAASGQAEK             | 1629.80 | 1629.80 | 0.00  | -0.13    | 4.E-11 |
| Q13123 | FAGSAGWEGTESLK                     | 1442.83 | 1438.67 | 4.16  | 2884.03  | 4.E-11 |
| P62736 | AGFAGDDAPRAVFPMSIVGRPRHQGMVMGMGQK  | 3307.68 | 3307.68 | 0.00  | 0.72     | 4.E-11 |
| O60812 | QKVDSLLENLEK                       | 1410.76 | 1414.77 | -4.01 | -2840.13 | 4.E-11 |
| O43823 | FRSFDDEEIQK                        | 1411.82 | 1412.66 | -0.84 | -597.66  | 4.E-11 |
| P63244 | (52)TEQMTRLRGTLK                   | 1314.78 | 1318.69 | -3.91 | -2977.09 | 4.E-11 |
| P13645 | VRALEESNYELEGK                     | 1635.81 | 1635.81 | 0.00  | -0.48    | 5.E-11 |
| P13645 | VRALEESNYELEGK                     | 1639.94 | 1635.81 | 4.13  | 2516.26  | 5.E-11 |
| P22626 | RSRGGFVTFSSMAEVDAAMAARPHSIDGRVVEPK | 3777.88 | 3777.88 | 0.00  | -0.79    | 5.E-11 |

|        |                                                                                                                                             |          |          |        |          |        |
|--------|---------------------------------------------------------------------------------------------------------------------------------------------|----------|----------|--------|----------|--------|
| P18621 | VRYSLDPENPTK                                                                                                                                | 1417.70  | 1417.72  | -0.02  | -16.45   | 6.E-11 |
| P18621 | VRYSLDPENPTK                                                                                                                                | 1417.72  | 1417.72  | 0.00   | -1.43    | 6.E-11 |
| P52272 | (41)AAGVEAAA EVAATEIKMEEESGAPGVPSGNGAPGPK                                                                                                   | 3391.61  | 3390.62  | 0.99   | 293.26   | 6.E-11 |
| Q71DI3 | TDLRFQSSAVMALQEASEAYLVGLFEDTNLCAIHAK                                                                                                        | 4116.92  | 3940.93  | 175.99 | 42748.10 | 7.E-11 |
| O60812 | QKVDSLLENLEK                                                                                                                                | 1414.75  | 1414.77  | -0.02  | -15.72   | 7.E-11 |
| O60812 | QKVDSLLENLEK                                                                                                                                | 1414.77  | 1414.77  | 0.00   | -1.44    | 7.E-11 |
| Q00839 | YNILGTNTIMDK                                                                                                                                | 1381.69  | 1381.69  | 0.00   | -1.19    | 7.E-11 |
| O75526 | YGRIVEVLLMK                                                                                                                                 | 1319.76  | 1319.76  | 0.00   | 0.00     | 7.E-11 |
| Q86U42 | (41)AAAAAAAAAAGAAGGRGSGPGRRRHLVPGAGGEAGEG<br>APGGAGDYGNGLSEEELEPEELLLEPEPEPEPEEEEEPPRRA<br>PPGAPGPGPGSGAPGSQEEEEEPGLVEGDPGDGAIEDPELE<br>AIK | 11816.58 | 11816.60 | -0.02  | -1.93    | 8.E-11 |
| P22626 | LFVGGIKEDTEEHHLRDYFEEYGKIDTIEIITDRQSGKK                                                                                                     | 4608.30  | 4608.31  | -0.01  | -1.98    | 8.E-11 |
| P33778 | AMGIMNSFVNDIFERIAGEASRLAHYNK                                                                                                                | 3169.48  | 3153.55  | 15.93  | 5025.82  | 8.E-11 |
| P33778 | AMGIMNSFVNDIFERIAGEASRLAHYNK                                                                                                                | 3169.54  | 3153.55  | 15.99  | 5043.78  | 8.E-11 |
| P46777 | HIMGQNVADYMRYLMEEDEDAYKK                                                                                                                    | 2948.30  | 2948.31  | -0.01  | -1.96    | 8.E-11 |
| P62805 | RISGLIYEETRGVLK                                                                                                                             | 1732.98  | 1732.98  | 0.00   | -2.39    | 8.E-11 |
| P45973 | WKDTDEADLVLAK                                                                                                                               | 1505.85  | 1502.76  | 3.09   | 2054.23  | 9.E-11 |

|        |                                     |         |         |       |        |        |
|--------|-------------------------------------|---------|---------|-------|--------|--------|
| Q92522 | (51)SVELEEALPVTTAEGMAK              | 1916.95 | 1915.94 | 1.01  | 524.35 | 1.E-10 |
| P33778 | AMGIMNSFVNDIFERIAGEASRLAHYNK        | 3153.54 | 3153.55 | -0.01 | -2.78  | 1.E-10 |
| P33778 | AMGIMNSFVNDIFERIAGEASRLAHYNK        | 3154.50 | 3153.55 | 0.95  | 301.26 | 1.E-10 |
| P06748 | LAADEDDEDEDEDEDEDEDEDFDEEEAEEKAPVKK | 4245.55 | 4245.54 | 0.01  | 2.36   | 1.E-10 |
| P16403 | (51)SETAPAAPAAAPPAEKAPVKK           | 2043.10 | 2043.10 | 0.00  | 0.48   | 1.E-10 |
| P09651 | GGNFGGRSSGPYGGGGQYFAK               | 2019.92 | 2019.92 | 0.00  | -0.39  | 1.E-10 |
| P22626 | RGFGFVTFDDHDPVDKIVLQK               | 2432.24 | 2432.25 | -0.01 | -3.08  | 1.E-10 |
| P39019 | DQDGGRKLTPQGQRDLDRAGQVAAANK         | 2977.54 | 2977.54 | 0.00  | -1.59  | 1.E-10 |
| P08729 | QEELEAALQRAK                        | 1384.71 | 1384.73 | -0.02 | -15.83 | 1.E-10 |
| P08729 | QEELEAALQRAK                        | 1384.73 | 1384.73 | 0.00  | -1.24  | 1.E-10 |
| P45973 | WKDTDEADLVLAK                       | 1502.76 | 1502.76 | 0.00  | -1.15  | 1.E-10 |
| P05204 | VKDEPQRRSARLSAKPAPPKPEPKPK          | 2906.66 | 2906.66 | 0.00  | -0.58  | 1.E-10 |
| P62913 | VLEQLTGQTPVFSK                      | 1545.85 | 1545.84 | 0.01  | 5.80   | 1.E-10 |
| P04908 | LLGRVTIAQGGVLPNIQAVLLPK             | 2369.45 | 2369.45 | -0.01 | -2.10  | 1.E-10 |
| P84090 | (51)SHTILLVQPTK                     | 1278.73 | 1277.73 | 1.00  | 783.70 | 1.E-10 |

|        |                                       |         |         |        |          |        |
|--------|---------------------------------------|---------|---------|--------|----------|--------|
| P62910 | AIVERAAQLAIRVTNPNARLRSEENE            | 2919.56 | 2919.56 | 0.00   | -1.51    | 1.E-10 |
| P08670 | TVETRDGQVINETSQHDDLE                  | 2422.10 | 2422.10 | 0.00   | -1.79    | 1.E-10 |
| P33778 | AMGIMNSFVNDIFERIAGEASRLAHYNK          | 3169.53 | 3153.55 | 15.98  | 5040.39  | 1.E-10 |
| P33778 | AMGIMNSFVNDIFERIAGEASRLAHYNK          | 3175.46 | 3153.55 | 21.91  | 6899.18  | 1.E-10 |
| P33778 | AMGIMNSFVNDIFERIAGEASRLAHYNK          | 3175.52 | 3153.55 | 21.97  | 6919.19  | 1.E-10 |
| A6NFF6 | (49)MASVSKLACIYSALILHDDEVTVTEDKINALIK | 3690.80 | 3644.90 | 45.90  | 12435.60 | 1.E-10 |
| P62857 | (49)MDTSRVQPIK                        | 1215.63 | 1215.63 | 0.00   | 0.75     | 2.E-10 |
| Q9Y3U8 | ALRYPMAVGLNK                          | 1331.72 | 1331.74 | -0.02  | -13.41   | 2.E-10 |
| Q9Y3U8 | ALRYPMAVGLNK                          | 1331.74 | 1331.74 | 0.00   | 1.16     | 2.E-10 |
| Q9Y3U8 | ALRYPMAVGLNK                          | 1331.83 | 1331.74 | 0.09   | 69.79    | 2.E-10 |
| P17096 | RGRGRPRKQPPVSPGTALVGSQKEPSEVPTPK      | 3392.87 | 3392.88 | -0.01  | -2.07    | 2.E-10 |
| P17096 | RGRGRPRKQPPVSPGTALVGSQKEPSEVPTPK      | 3395.74 | 3392.88 | 2.86   | 842.25   | 2.E-10 |
| A6NFA7 | (46)GIMNSFVNDIFERIAGEASRLAHYNK        | 3169.53 | 2993.48 | 176.05 | 55544.60 | 2.E-10 |
| Q09666 | GSRVDIETPNLEGLTGPRLGSPSGK             | 2637.37 | 2637.37 | 0.00   | -1.08    | 2.E-10 |
| P39019 | SVARRVLQALEGLK                        | 1538.83 | 1538.93 | -0.10  | -67.99   | 2.E-10 |

|        |                                  |         |         |       |         |        |
|--------|----------------------------------|---------|---------|-------|---------|--------|
| P39019 | SVARRVLQALEGLK                   | 1538.90 | 1538.93 | -0.03 | -17.43  | 2.E-10 |
| P39019 | SVARRVLQALEGLK                   | 1538.93 | 1538.93 | 0.00  | -0.21   | 2.E-10 |
| P39019 | SVARRVLQALEGLK                   | 1541.80 | 1538.93 | 2.87  | 1860.80 | 2.E-10 |
| P61513 | TVAGGAWTYNTTSAVTVK               | 1825.92 | 1825.92 | 0.00  | -0.66   | 2.E-10 |
| P62805 | RISGLIYEETRGVLK                  | 1732.98 | 1732.98 | 0.00  | -2.27   | 2.E-10 |
| P62841 | EAPPMEKPEVVK                     | 1352.70 | 1352.70 | 0.00  | -1.37   | 2.E-10 |
| P62841 | EAPPMEKPEVVK                     | 1353.68 | 1352.70 | 0.98  | 725.76  | 2.E-10 |
| P62841 | EAPPMEKPEVVK                     | 1355.71 | 1352.70 | 3.01  | 2218.72 | 2.E-10 |
| P17096 | RGRGRPRKQPPVSPGTALVGSQKEPSEVPTPK | 3391.80 | 3392.88 | -1.08 | -318.99 | 2.E-10 |
| Q09666 | GSRVDIETPNLEGLTGPRLGSPSGK        | 2641.42 | 2637.37 | 4.05  | 1534.23 | 2.E-10 |
| Q00839 | YNILGTNTIMDK                     | 1381.69 | 1381.69 | 0.00  | -2.06   | 2.E-10 |
| Q09666 | ISMPDVDLHLK                      | 1266.64 | 1266.66 | -0.02 | -13.41  | 2.E-10 |
| Q09666 | ISMPDVDLHLK                      | 1266.66 | 1266.66 | 0.00  | -0.94   | 2.E-10 |
| Q09666 | ISMPDVDLHLK                      | 1268.64 | 1266.66 | 1.98  | 1556.88 | 2.E-10 |
| Q09666 | ISMPDVDLHLK                      | 1268.65 | 1266.66 | 1.99  | 1569.31 | 2.E-10 |



|        |                                         |         |         |       |          |        |
|--------|-----------------------------------------|---------|---------|-------|----------|--------|
| Q09666 | ISMPDVDLHLK                             | 1269.62 | 1266.66 | 2.96  | 2330.62  | 2.E-10 |
| P25705 | AVDSLVPPIGRGQRELIIGDRQTGK               | 2577.44 | 2577.44 | 0.00  | -1.02    | 2.E-10 |
| P0C0S8 | TRIIPRHLQLAIRNDEELNK                    | 2428.31 | 2428.37 | -0.06 | -24.23   | 2.E-10 |
| P0C0S8 | TRIIPRHLQLAIRNDEELNK                    | 2428.37 | 2428.37 | 0.00  | -1.74    | 2.E-10 |
| Q16695 | RVTIMPKDIQLARRIGERA                     | 2375.27 | 2378.38 | -3.11 | -1307.36 | 2.E-10 |
| Q16695 | RVTIMPKDIQLARRIGERA                     | 2378.37 | 2378.38 | -0.01 | -2.54    | 2.E-10 |
| P04083 | GVDEATIIDILTK                           | 1386.26 | 1386.76 | -0.50 | -357.92  | 2.E-10 |
| P04083 | GVDEATIIDILTK                           | 1386.76 | 1386.76 | 0.00  | -0.13    | 2.E-10 |
| P22626 | KLFVGGIKEDTEEHHLRDYFEEYGKIDTIEIITDRQSGK | 4608.29 | 4608.31 | -0.02 | -4.20    | 2.E-10 |
| Q09666 | MDIDAPDVEVQGPDWHLK                      | 2063.95 | 2063.96 | -0.01 | -2.57    | 3.E-10 |
| Q9BUV3 | ATGATQQDANASSLLDIYSFWLNRSK              | 2927.44 | 2927.44 | 0.00  | -1.17    | 3.E-10 |
| P33778 | AMGIMNSFVNDIFERIAGEASRLAHYNK            | 3149.55 | 3153.55 | -4.00 | -1270.81 | 3.E-10 |
| P33778 | AMGIMNSFVNDIFERIAGEASRLAHYNK            | 3149.88 | 3153.55 | -3.67 | -1164.99 | 3.E-10 |
| P09651 | RSRFGFVTYATVEEVDAAMNARPHKVDGRVVEPK      | 3887.98 | 3887.99 | -0.01 | -1.79    | 3.E-10 |
| Q00839 | YNILGTNTIMDK                            | 1381.69 | 1381.69 | 0.00  | -0.25    | 3.E-10 |

|        |                              |         |         |       |          |        |
|--------|------------------------------|---------|---------|-------|----------|--------|
| Q00839 | YNILGTNTIMDK                 | 1382.67 | 1381.69 | 0.98  | 710.62   | 3.E-10 |
| P04083 | GVDEATIIDILTK                | 1385.73 | 1386.76 | -1.03 | -744.50  | 3.E-10 |
| P53999 | EQISDIDDAVRKL                | 1500.78 | 1500.78 | 0.00  | -0.37    | 3.E-10 |
| P53999 | EQISDIDDAVRKL                | 1505.77 | 1500.78 | 4.99  | 3315.81  | 3.E-10 |
| P33778 | AMGIMNSFVNDIFERIAGEASRLAHYNK | 3152.21 | 3153.55 | -1.34 | -425.02  | 3.E-10 |
| P33778 | AMGIMNSFVNDIFERIAGEASRLAHYNK | 3155.88 | 3153.55 | 2.33  | 738.22   | 3.E-10 |
| P33778 | AMGIMNSFVNDIFERIAGEASRLAHYNK | 3156.21 | 3153.55 | 2.66  | 843.90   | 3.E-10 |
| P07355 | DIISDTSGDFRK                 | 1351.73 | 1352.66 | -0.93 | -685.63  | 3.E-10 |
| P07355 | DIISDTSGDFRK                 | 1352.66 | 1352.66 | 0.00  | 0.90     | 3.E-10 |
| P35637 | LKGEATVSFDDPPSAK             | 1656.95 | 1660.83 | -3.88 | -2339.09 | 3.E-10 |
| P35637 | LKGEATVSFDDPPSAK             | 1660.83 | 1660.83 | 0.00  | 1.34     | 3.E-10 |
| P62304 | GDNITLLQSVSN                 | 1259.64 | 1259.64 | 0.00  | -0.66    | 3.E-10 |
| Q09666 | LKGPQITGPSLEGDLGLK           | 1822.02 | 1822.02 | 0.00  | 2.05     | 3.E-10 |
| Q09666 | ISMPDVDLHLK                  | 1266.65 | 1266.66 | -0.02 | -11.83   | 3.E-10 |
| Q09666 | ISMPDVDLHLK                  | 1266.66 | 1266.66 | 0.00  | 1.35     | 3.E-10 |

|        |                                       |         |         |         |           |        |
|--------|---------------------------------------|---------|---------|---------|-----------|--------|
| Q09666 | ISMPDVDLHLK                           | 1268.66 | 1266.66 | 2.00    | 1574.27   | 3.E-10 |
| P33778 | AMGIMNSFVNDIFERIAGEASRLAHYNK          | 3152.88 | 3153.55 | -0.67   | -212.87   | 3.E-10 |
| P33778 | AMGIMNSFVNDIFERIAGEASRLAHYNK          | 3153.41 | 3153.55 | -0.14   | -45.78    | 3.E-10 |
| P33778 | AMGIMNSFVNDIFERIAGEASRLAHYNK          | 3153.48 | 3153.55 | -0.07   | -22.63    | 3.E-10 |
| P33778 | AMGIMNSFVNDIFERIAGEASRLAHYNK          | 3153.54 | 3153.55 | -0.01   | -2.46     | 3.E-10 |
| P33778 | AMGIMNSFVNDIFERIAGEASRLAHYNK          | 3153.65 | 3153.55 | 0.10    | 31.59     | 3.E-10 |
| P05783 | KGPQVRDWSHYFK                         | 1646.83 | 1646.83 | 0.00    | -1.42     | 3.E-10 |
| P08758 | GLGTDEESILLLTSRSNAQRQEISAAFK          | 3134.61 | 3134.62 | -0.01   | -1.89     | 3.E-10 |
| P19338 | EVFEDAAEIRLVSK                        | 1604.84 | 1604.84 | 0.00    | -0.65     | 3.E-10 |
| P19338 | EAMEDGEIDGNKVTLDWAKPK                 | 2345.12 | 2345.12 | 0.00    | -0.63     | 3.E-10 |
| P33778 | AMGIMNSFVNDIFERIAGEASRLAHYNK          | 3156.50 | 3153.55 | 2.95    | 934.43    | 4.E-10 |
| P22626 | LFVGGIKEDTEEHHLRDYFEEYGK              | 2913.34 | 2910.38 | 2.96    | 1016.50   | 4.E-10 |
| P22626 | LFVGGIKEDTEEHHLRDYFEEYGK              | 2913.40 | 2910.38 | 3.02    | 1037.45   | 4.E-10 |
| P60709 | YSVWIGGSILASLSTFQQMWISKQEYDESGPSIVHRK | 4118.19 | 4227.11 | -108.93 | -26449.90 | 4.E-10 |
| P62805 | RISGLIYEETRGVLK                       | 1732.98 | 1732.98 | 0.00    | -2.27     | 4.E-10 |

|        |                                                 |         |         |         |           |        |
|--------|-------------------------------------------------|---------|---------|---------|-----------|--------|
| O14979 | VFVGGLSPDTSEEQIK                                | 1704.86 | 1704.86 | 0.00    | -2.05     | 4.E-10 |
| P62857 | (49)MDTSRVQPIK                                  | 1216.62 | 1215.63 | 0.99    | 812.18    | 4.E-10 |
| P22626 | RGFGFVTFDDHDPVDKIVLQK                           | 2432.24 | 2432.25 | -0.01   | -3.04     | 5.E-10 |
| P13010 | KKDQVTAQEIQDNHEDGPTAK                           | 2508.08 | 2498.20 | 9.88    | 3938.23   | 5.E-10 |
| P23246 | DKLESEMEDAYHEHQANLLRQDLMRRQEELRRMEELHNQE<br>MQK | 5435.55 | 5435.56 | -0.01   | -1.10     | 5.E-10 |
| Q9Y6M9 | (41)AFLASGPYLTHQQK                              | 1602.82 | 1601.82 | 1.00    | 626.45    | 5.E-10 |
| Q6P2Q9 | QNPFWWTHQRHDGKLVNLLNNYRTDMIQALGGVEGILEHTLF<br>K | 4885.49 | 5062.52 | -177.03 | -36236.60 | 5.E-10 |
| P05783 | VKLEAEIATYRRLLEDGEDFNLDALDSSNSMQTIQK            | 4168.93 | 4169.06 | -0.13   | -31.47    | 5.E-10 |
| P05783 | VKLEAEIATYRRLLEDGEDFNLDALDSSNSMQTIQK            | 4169.05 | 4169.06 | -0.01   | -3.53     | 5.E-10 |
| P33778 | AMGIMNSFVNDIFERIAGEASRLAHYNK                    | 3153.54 | 3153.55 | -0.01   | -3.06     | 5.E-10 |
| Q14978 | (41)ADAGIRRVVPSDLYPLVLGFLRDNQLSEVANK            | 3566.91 | 3566.92 | -0.01   | -2.10     | 5.E-10 |
| P62081 | IVKPNGEKPDEFESGISQALLELEMNSDLK                  | 3330.65 | 3329.67 | 0.98    | 293.30    | 5.E-10 |
| O14979 | MFIGGLSWDTSKK                                   | 1468.74 | 1468.74 | 0.00    | -1.92     | 5.E-10 |
| P60709 | LCYVALDFEQEMATAASSSSLEK                         | 2492.15 | 2492.15 | 0.00    | -1.79     | 5.E-10 |
| P33778 | AMGIMNSFVNDIFERIAGEASRLAHYNK                    | 3169.54 | 3153.55 | 15.99   | 5043.75   | 5.E-10 |

|        |                                                  |         |         |       |          |        |
|--------|--------------------------------------------------|---------|---------|-------|----------|--------|
| Q7Z4V5 | PHAFKPGDLVFAK                                    | 1426.79 | 1425.78 | 1.01  | 705.00   | 6.E-10 |
| P08758 | GLGTDEESILLLTSRSNAQRQEISAAFK                     | 3134.61 | 3134.62 | -0.01 | -1.83    | 6.E-10 |
| P62857 | (49)MDTSRVQPIK                                   | 1215.63 | 1215.63 | 0.00  | 0.84     | 6.E-10 |
| P06748 | LAADEDDEEDDEEDDEEDDEEDDFDEEEAEEKAPVK             | 4117.34 | 4117.45 | -0.11 | -26.55   | 6.E-10 |
| P06748 | LAADEDDEEDDEEDDEEDDEEDDFDEEEAEEKAPVK             | 4117.44 | 4117.45 | -0.01 | -2.75    | 6.E-10 |
| P19338 | KQKVEGTEPTTAFNLFVGNLNFNK                         | 2695.40 | 2695.40 | 0.00  | 1.55     | 6.E-10 |
| P0C0S8 | TRIIPRHLQLAIRNDEELNK                             | 2428.31 | 2428.37 | -0.06 | -24.72   | 7.E-10 |
| P0C0S8 | TRIIPRHLQLAIRNDEELNK                             | 2428.36 | 2428.37 | -0.01 | -3.76    | 7.E-10 |
| Q14980 | EVARLETLVRK                                      | 1312.78 | 1312.78 | 0.00  | -0.50    | 7.E-10 |
| P04083 | QAWFIENEEQEYVQTVK                                | 2140.01 | 2140.01 | 0.00  | -0.22    | 7.E-10 |
| P60866 | RLIDLHSPSEIVK                                    | 1509.73 | 1505.86 | 3.88  | 2566.65  | 8.E-10 |
| P62805 | VFLENVIRDAVITYTEHAKRKTVTAMDVVYALKRQGRTLYGFG<br>G | 4922.77 | 4872.59 | 50.18 | 10193.10 | 8.E-10 |
| P62805 | VFLENVIRDAVITYTEHAKRKTVTAMDVVYALKRQGRTLYGFG<br>G | 4924.28 | 4872.59 | 51.69 | 10496.90 | 8.E-10 |
| Q14980 | EVARLETLVRK                                      | 1315.67 | 1312.78 | 2.89  | 2194.43  | 9.E-10 |
| P62987 | IIEPSLRQLAQK                                     | 1394.82 | 1394.82 | 0.00  | -0.38    | 9.E-10 |

|        |                                                 |         |         |       |        |        |
|--------|-------------------------------------------------|---------|---------|-------|--------|--------|
| P22626 | RSRGFGFVTFSSMAEVDAAAMAARPHSIDGRVVEPK            | 3777.87 | 3777.88 | -0.01 | -1.98  | 9.E-10 |
| P07910 | ELTQIKQKVDLSLLENLEK                             | 2129.04 | 2127.18 | 1.86  | 872.38 | 9.E-10 |
| Q00839 | KRNFILDQTNVSAQAQRK                              | 2215.23 | 2215.23 | 0.00  | -0.52  | 1.E-09 |
| P62829 | GRLNRLPAAGVGDMMATVKK                            | 2183.20 | 2183.20 | 0.00  | -1.12  | 1.E-09 |
| Q08211 | SEEVPAFGVASPPPLTDTPTTANAEGDLPTTMGGPLPPHLA<br>LK | 4408.16 | 4408.18 | -0.02 | -3.84  | 1.E-09 |
| P23396 | GGKPEPPAMPQPVPTA                                | 1572.80 | 1572.80 | 0.00  | -1.89  | 1.E-09 |
| P14866 | DFSESRRNRFSTPEQAAK                              | 2082.97 | 2082.97 | 0.00  | -0.52  | 1.E-09 |
| Q13813 | VNSLGETAERLIQSHPESAEDLQEK                       | 2779.36 | 2779.36 | 0.00  | -0.35  | 1.E-09 |
| P83731 | FQRAITGASLADIMAK                                | 1691.90 | 1691.90 | 0.00  | -0.74  | 1.E-09 |
| P83731 | FQRAITGASLADIMAK                                | 1692.90 | 1691.90 | 1.00  | 592.62 | 1.E-09 |
| P39019 | SVARRVLQALEGLK                                  | 1538.93 | 1538.93 | 0.00  | -1.19  | 1.E-09 |
| P31943 | DRETMGHRYVEVFK                                  | 1765.86 | 1765.86 | 0.00  | -1.00  | 2.E-09 |
| P47914 | GVSRLDRLAYIAHPK                                 | 1822.88 | 1823.05 | -0.17 | -92.13 | 2.E-09 |
| P47914 | GVSRLDRLAYIAHPK                                 | 1823.05 | 1823.05 | 0.00  | -2.05  | 2.E-09 |
| P15880 | SLEEIYLFSLPIKESIIDFFLGASLKDEVK                  | 3684.97 | 3684.98 | -0.01 | -3.66  | 2.E-09 |

|        |                                         |         |         |       |          |        |
|--------|-----------------------------------------|---------|---------|-------|----------|--------|
| P05387 | NIEDVIAQGIGK                            | 1255.68 | 1255.68 | 0.00  | -0.94    | 2.E-09 |
| P62805 | RISGLIYEETRGVLK                         | 1734.95 | 1732.98 | 1.97  | 1135.80  | 2.E-09 |
| Q6F113 | GNYAERVGAGAPVYMAAVLEYLTAEILELAGNAARDNKK | 4107.99 | 4108.11 | -0.12 | -28.18   | 2.E-09 |
| P08708 | LLDFGSLSNLQVTQPTVGMNFK                  | 2408.23 | 2408.24 | -0.01 | -3.43    | 2.E-09 |
| P33240 | (41)AGLTVRDPVDRSLRSVFGNIPYEATEEQLK      | 3571.86 | 3571.86 | 0.00  | -0.71    | 2.E-09 |
| P62805 | RISGLIYEETRGVLK                         | 1732.97 | 1732.98 | -0.01 | -4.06    | 2.E-09 |
| P62805 | RISGLIYEETRGVLK                         | 1736.68 | 1732.98 | 3.70  | 2132.89  | 2.E-09 |
| P02751 | TYHVGEQWQK                              | 1279.70 | 1274.60 | 5.10  | 3985.31  | 2.E-09 |
| P02751 | TYHVGEQWQK                              | 1279.72 | 1274.60 | 5.12  | 3998.39  | 2.E-09 |
| P39019 | SVARRVLQALEGLK                          | 1535.79 | 1538.93 | -3.14 | -2042.16 | 2.E-09 |
| Q92900 | LLGHEVEDVIK                             | 1365.85 | 1363.77 | 2.08  | 1520.98  | 2.E-09 |
| Q92841 | KWDLSELPKFEK                            | 1525.85 | 1518.81 | 7.04  | 4611.29  | 2.E-09 |
| P28370 | APRPPKQPNVQDFQFFPRLFELLEK               | 3145.72 | 3137.68 | 8.04  | 2556.55  | 2.E-09 |
| P40429 | YQAVTATLEEK                             | 1251.63 | 1251.63 | 0.00  | -0.77    | 2.E-09 |
| Q86V81 | LLVSNLDFGVSDADIQELFAEFGTLKK             | 2968.54 | 2968.54 | 0.00  | -0.60    | 3.E-09 |

|        |                                         |         |         |       |          |        |
|--------|-----------------------------------------|---------|---------|-------|----------|--------|
| Q86V81 | LLVSNLDFGVSDADIQELFAEFGTLKK             | 2969.63 | 2968.54 | 1.09  | 366.95   | 3.E-09 |
| Q86V81 | LLVSNLDFGVSDADIQELFAEFGTLKK             | 2969.92 | 2968.54 | 1.38  | 464.19   | 3.E-09 |
| Q86V81 | LLVSNLDFGVSDADIQELFAEFGTLKK             | 2971.22 | 2968.54 | 2.68  | 901.82   | 3.E-09 |
| P11021 | KSDIDEIVLVGGSTRIPK                      | 1925.04 | 1926.08 | -1.04 | -541.42  | 3.E-09 |
| P43243 | RGAPPSSNIEDFHGLLPK                      | 1934.00 | 1934.00 | 0.00  | -1.38    | 3.E-09 |
| P05783 | IMADIRAQYDELARK                         | 1791.93 | 1791.93 | 0.00  | -1.86    | 3.E-09 |
| P62701 | GIPHLVTHDARTIRYPDPLIK                   | 2411.33 | 2411.34 | -0.01 | -2.36    | 3.E-09 |
| Q16695 | RVTIMPKDIQLARRIGERA                     | 2380.38 | 2378.38 | 2.00  | 840.56   | 3.E-09 |
| P05787 | TEISEMNRNISRLQAEIEGLK                   | 2435.25 | 2430.25 | 5.00  | 2053.69  | 3.E-09 |
| Q6F113 | GNYAERVGAGAPVYMAAVLEYLTAEILELAGNAARDNKK | 4108.09 | 4108.11 | -0.02 | -4.38    | 3.E-09 |
| P68431 | DIQLARRIGERA                            | 1553.86 | 1552.89 | 0.97  | 627.36   | 3.E-09 |
| P06748 | TPKGPSSVEDIK                            | 1258.67 | 1256.66 | 2.01  | 1593.51  | 3.E-09 |
| P22626 | RSRFGFVTFSSMAEVDAAMAARPHSIDGRVVEPK      | 3777.87 | 3777.88 | -0.01 | -1.75    | 3.E-09 |
| Q00839 | AVVVCPKDEDYK                            | 1360.80 | 1364.66 | -3.86 | -2835.06 | 3.E-09 |
| Q00839 | AVVVCPKDEDYK                            | 1364.66 | 1364.66 | 0.00  | -0.42    | 3.E-09 |



|        |                                                                                    |         |         |       |          |        |
|--------|------------------------------------------------------------------------------------|---------|---------|-------|----------|--------|
| P62805 | VLRDNIQGITKPAIRRLARRGGVK                                                           | 2686.63 | 2686.63 | 0.00  | -0.91    | 3.E-09 |
| P22626 | LTDCVVMRDPASK                                                                      | 1432.69 | 1433.70 | -1.02 | -708.43  | 3.E-09 |
| P22626 | LTDCVVMRDPASK                                                                      | 1433.70 | 1433.70 | 0.00  | -0.18    | 3.E-09 |
| P22626 | LTDCVVMRDPASK                                                                      | 1435.69 | 1433.70 | 1.99  | 1384.94  | 3.E-09 |
| P68431 | DIQLARRIRGERA                                                                      | 1552.89 | 1552.89 | 0.00  | -2.24    | 4.E-09 |
| Q9UKM9 | LFARSTAVTTSSAK                                                                     | 1435.64 | 1438.78 | -3.15 | -2190.65 | 4.E-09 |
| Q9UKM9 | LFARSTAVTTSSAK                                                                     | 1438.78 | 1438.78 | 0.00  | 0.09     | 4.E-09 |
| Q99623 | MLGEALSKNPGYIK                                                                     | 1523.73 | 1519.81 | 3.92  | 2573.28  | 4.E-09 |
| P06748 | TPKGPSSVEDIK                                                                       | 1256.66 | 1256.66 | 0.00  | -0.88    | 4.E-09 |
| P16403 | (51)SETAPAAPAAAPPAEK                                                               | 1519.75 | 1519.75 | 0.00  | 0.64     | 4.E-09 |
| A5PLR1 | STELLIRKLPFQRLVREIAQDFKTLRFQSSAVMALQEACEAY<br>LVGLFEDTNLCAIHAKRVTIMPKDIQLARRIRGERA | 9096.91 | 9098.88 | -1.97 | -216.17  | 4.E-09 |
| A2BDF6 | STELLIRKLPFQRLVREIAQDFK                                                            | 2799.60 | 2799.61 | -0.01 | -1.84    | 4.E-09 |
| P62244 | VRMNVLADALK                                                                        | 1228.70 | 1228.70 | 0.00  | -1.67    | 4.E-09 |
| P06748 | TPKGPSSVEDIK                                                                       | 1254.62 | 1256.66 | -2.04 | -1627.11 | 4.E-09 |
| P06748 | TPKGPSSVEDIK                                                                       | 1256.64 | 1256.66 | -0.02 | -18.39   | 4.E-09 |

|        |                                         |         |         |       |          |        |
|--------|-----------------------------------------|---------|---------|-------|----------|--------|
| P39019 | SVARRVLQALEGLK                          | 1535.79 | 1538.93 | -3.14 | -2043.14 | 4.E-09 |
| P39019 | SVARRVLQALEGLK                          | 1538.93 | 1538.93 | 0.00  | -1.97    | 4.E-09 |
| P33778 | AMGIMNSFVNDIFERIAGEASRLAHYNK            | 3169.54 | 3153.55 | 15.99 | 5044.66  | 4.E-09 |
| P33778 | AMGIMNSFVNDIFERIAGEASRLAHYNK            | 3170.49 | 3153.55 | 16.94 | 5344.26  | 4.E-09 |
| P06748 | TPKGPSSVEDIK                            | 1261.58 | 1256.66 | 4.92  | 3902.63  | 5.E-09 |
| O00422 | (41)AVESRVTQEEIK                        | 1429.74 | 1429.74 | 0.00  | -0.97    | 5.E-09 |
| P22626 | KRGFGFVTFDDHDPVDKIVLQK                  | 2560.33 | 2560.34 | -0.01 | -3.57    | 5.E-09 |
| Q15233 | (49)MQSNKTFNLEK                         | 1380.67 | 1380.67 | 0.00  | 1.39     | 6.E-09 |
| Q8IY81 | GSFAGIEDDADEALEISQAQLLFENRRK            | 3123.48 | 3121.53 | 1.95  | 624.25   | 6.E-09 |
| O00422 | (41)AVESRVTQEEIK                        | 1433.60 | 1429.74 | 3.86  | 2690.58  | 7.E-09 |
| P16403 | ERSGVSLAALKK                            | 1255.72 | 1257.74 | -2.02 | -1606.29 | 7.E-09 |
| P35908 | TLNKNKASFIDK                            | 1392.75 | 1396.74 | -3.99 | -2867.83 | 7.E-09 |
| P62987 | IIEPSLRQLAQK                            | 1394.82 | 1394.82 | 0.00  | -0.88    | 7.E-09 |
| Q6FI13 | GNYAERVGAGAPVYMAAVLEYLTAEILELAGNAARDNKK | 4108.11 | 4108.11 | 0.00  | -0.80    | 8.E-09 |
| P04083 | GTDVNVFNTILTTRSYPQLRRVFQK               | 2952.58 | 2952.59 | -0.01 | -2.32    | 8.E-09 |

|        |                                      |         |         |       |          |        |
|--------|--------------------------------------|---------|---------|-------|----------|--------|
| P16403 | (51)SETAPAAPAAAPPAEK                 | 1541.71 | 1519.75 | 21.96 | 14241.30 | 8.E-09 |
| P16403 | (51)SETAPAAPAAAPPAEK                 | 1541.73 | 1519.75 | 21.98 | 14256.20 | 8.E-09 |
| P36578 | AFRNIPGITLLNVSK                      | 1641.93 | 1641.96 | -0.03 | -18.63   | 8.E-09 |
| P36578 | AFRNIPGITLLNVSK                      | 1641.96 | 1641.96 | 0.00  | -1.89    | 8.E-09 |
| P36578 | AFRNIPGITLLNVSK                      | 1645.88 | 1641.96 | 3.92  | 2378.68  | 8.E-09 |
| O60506 | NRGFCFLEYEDHK                        | 1656.74 | 1656.74 | 0.00  | -0.82    | 9.E-09 |
| P02545 | EREMAEMRARMQQQLDEYQELLDIK            | 3152.50 | 3152.51 | -0.01 | -1.77    | 9.E-09 |
| O00422 | (41)AVESRVTQEEIK                     | 1434.60 | 1429.74 | 4.86  | 3389.80  | 9.E-09 |
| Q15149 | GLVGPELHDRLLSAERAVTGYRDPYTEQTISLQAMK | 4161.12 | 4161.13 | -0.01 | -1.72    | 9.E-09 |
| P16403 | ERSGVSLAALKK                         | 1257.74 | 1257.74 | 0.00  | -0.44    | 1.E-08 |
| P46013 | VDMKEEPLAVSK                         | 1343.54 | 1344.70 | -1.16 | -860.02  | 1.E-08 |
| P46013 | VDMKEEPLAVSK                         | 1344.70 | 1344.70 | 0.00  | -0.95    | 1.E-08 |
| P23246 | ERETPPRFAQHGTFEYEYSQRWK              | 2941.38 | 2941.39 | -0.01 | -1.72    | 1.E-08 |
| P05204 | VKDEPQRRSARLSAKPAPPKPEPKPK           | 2908.66 | 2906.66 | 2.00  | 687.61   | 1.E-08 |
| P16403 | ERSGVSLAALKK                         | 1257.72 | 1257.74 | -0.02 | -13.80   | 1.E-08 |

|        |                                                                  |         |         |       |          |        |
|--------|------------------------------------------------------------------|---------|---------|-------|----------|--------|
| P16403 | ERSGVSLAALKK                                                     | 1257.74 | 1257.74 | 0.00  | -1.32    | 1.E-08 |
| P35908 | TLNNKFASFIDK                                                     | 1396.74 | 1396.74 | 0.00  | 1.40     | 1.E-08 |
| P35908 | TLNNKFASFIDK                                                     | 1396.79 | 1396.74 | 0.05  | 35.76    | 1.E-08 |
| P08621 | (52)TQFLPPNLLALFAPRDPIPYLPPLEK                                   | 3001.66 | 3001.67 | -0.01 | -2.19    | 1.E-08 |
| P22626 | RAVAREESGKPGAHVTVK                                               | 1891.04 | 1891.04 | 0.00  | -0.34    | 1.E-08 |
| P22626 | KRGFGFVTFDDHDPVDKIVLQK                                           | 2560.33 | 2560.34 | -0.01 | -2.01    | 1.E-08 |
| P06748 | MSVQPTVSLGGFEITPPVLRK                                            | 2467.39 | 2467.39 | 0.00  | -1.95    | 1.E-08 |
| Q2TA72 | SFPPLNRPPMGIPALPPGIPPPQFPGFPPVPPGTPMIPVP<br>MSIMAPAPTVLVPTVSMVGK | 6431.42 | 6361.39 | 70.03 | 10889.40 | 1.E-08 |
| P18077 | IEGVYARDETEFYLGK                                                 | 1892.96 | 1888.92 | 4.04  | 2133.46  | 1.E-08 |
| Q01082 | KHQILEQAVEDYAETVHQLSK                                            | 2473.25 | 2465.26 | 7.99  | 3229.00  | 1.E-08 |
| P09651 | RSRGFGFVTYATVEEVDAAMNARPHK                                       | 2908.44 | 2908.44 | 0.00  | -0.51    | 1.E-08 |
| P09651 | RSRGFGFVTYATVEEVDAAMNARPHK                                       | 2908.58 | 2908.44 | 0.14  | 48.72    | 1.E-08 |
| P09651 | RAVSREDSQRPGAHLTVK                                               | 2006.05 | 2006.08 | -0.03 | -14.97   | 1.E-08 |
| P09651 | RAVSREDSQRPGAHLTVK                                               | 2006.08 | 2006.08 | 0.00  | -0.67    | 1.E-08 |
| P16403 | (51)SETAAPAAAPPAEK                                               | 1519.75 | 1519.75 | 0.00  | 1.10     | 2.E-08 |

|        |                                      |         |         |        |          |        |
|--------|--------------------------------------|---------|---------|--------|----------|--------|
| Q16695 | RVTIMPKDIQLARRIRGERA                 | 2380.38 | 2378.38 | 2.00   | 840.23   | 2.E-08 |
| P25398 | (41)AEEGIAAGGVMDVNTALQEVLK           | 2256.14 | 2256.13 | 0.01   | 2.46     | 2.E-08 |
| P16403 | ERSGVSLAALKK                         | 1257.74 | 1257.74 | 0.00   | -0.04    | 2.E-08 |
| O75531 | HRDFVAEPMGEKPVGSLAGIGEVLGK           | 2692.40 | 2692.40 | 0.00   | -1.71    | 2.E-08 |
| Q9Y3U8 | ALRYPMAVGLNK                         | 1330.58 | 1331.74 | -1.16  | -870.87  | 2.E-08 |
| Q1KMD3 | VVVVVPNEEDWKK                        | 1539.83 | 1539.83 | 0.00   | -1.72    | 2.E-08 |
| Q1KMD3 | VVVVVPNEEDWKK                        | 1543.89 | 1539.83 | 4.06   | 2631.43  | 2.E-08 |
| P33778 | RSTITSREIQTAVRLLLLPGELAK             | 2551.49 | 2551.48 | 0.01   | 2.11     | 2.E-08 |
| P33778 | AMGIMNSFVNDIFERIAGEASRLAHYNK         | 3175.52 | 3153.55 | 21.97  | 6919.19  | 2.E-08 |
| P33778 | AMGIMNSFVNDIFERIAGEASRLAHYNK         | 3176.46 | 3153.55 | 22.91  | 7213.32  | 2.E-08 |
| P26373 | LILFPRKPSAPK                         | 1365.85 | 1365.85 | 0.00   | -1.03    | 2.E-08 |
| Q71DI3 | TDLRFQSSAVMALQEASEAYLVGLFEDTNLCAIHAK | 4116.90 | 3940.93 | 175.97 | 42743.90 | 2.E-08 |
| Q9Y3U8 | ALRYPMAVGLNK                         | 1327.62 | 1331.74 | -4.12  | -3100.32 | 2.E-08 |
| Q9Y3U8 | ALRYPMAVGLNK                         | 1331.74 | 1331.74 | 0.00   | -0.87    | 2.E-08 |
| P05787 | TEISEMNRNISRLQAEIEGLK                | 2432.24 | 2430.25 | 1.99   | 818.40   | 2.E-08 |

|        |                                      |         |         |       |          |        |
|--------|--------------------------------------|---------|---------|-------|----------|--------|
| Q14103 | KIFVGGGLSPDTPEEK                     | 1615.85 | 1615.85 | 0.00  | -1.23    | 2.E-08 |
| P14866 | NPNGPYPYTLK                          | 1262.63 | 1262.63 | 0.00  | -0.73    | 2.E-08 |
| P42677 | RLVQSPNSYFMDVK                       | 1679.85 | 1682.85 | -3.00 | -1788.63 | 3.E-08 |
| P42677 | RLVQSPNSYFMDVK                       | 1682.85 | 1682.85 | 0.00  | -1.61    | 3.E-08 |
| P07355 | AYTNFDAERDALNIETAIK                  | 2154.06 | 2154.06 | 0.00  | -1.52    | 3.E-08 |
| P05783 | KGPQVRDWSHYFK                        | 1646.83 | 1646.83 | 0.00  | -0.26    | 3.E-08 |
| Q14978 | (41)ADAGIRRVVPSDLYPLVLGFLRDNQLSEVANK | 3566.91 | 3566.92 | -0.01 | -2.82    | 3.E-08 |
| P62987 | IIEPSLRQLAQK                         | 1394.82 | 1394.82 | 0.00  | -0.59    | 3.E-08 |
| Q13727 | ISMPDFDLHLK                          | 1314.64 | 1314.66 | -0.02 | -12.69   | 3.E-08 |
| Q13727 | ISMPDFDLHLK                          | 1314.66 | 1314.66 | 0.00  | 1.23     | 3.E-08 |
| Q09666 | ISMPDIDLNLKGPK                       | 1537.82 | 1539.83 | -2.01 | -1308.37 | 3.E-08 |
| P14866 | NPNGPYPYTLK                          | 1263.61 | 1262.63 | 0.98  | 778.15   | 3.E-08 |
| Q9Y5J1 | AIMNLVTGVTSLTFNPTTEILAIASEK          | 2842.61 | 2833.51 | 9.10  | 3200.00  | 3.E-08 |
| P05783 | GLQAQIASSGLTVEVDAPK                  | 1883.00 | 1883.00 | 0.00  | -2.42    | 4.E-08 |
| P05783 | GLQAQIASSGLTVEVDAPK                  | 1883.00 | 1883.00 | 0.00  | -2.42    | 4.E-08 |

|        |                                                                                                       |         |         |       |         |        |
|--------|-------------------------------------------------------------------------------------------------------|---------|---------|-------|---------|--------|
| P05783 | YWSQQIEESTTVVTTQSAEVGAAETTLTELRRTVQSLEIDLDS<br>MRNLK                                                  | 5425.69 | 5426.72 | -1.03 | -189.65 | 4.E-08 |
| Q3BDU5 | LDNARQSAERNNSNLVGAACHEELQQSRIRIDSLSAQLSQLQK                                                           | 4573.36 | 4573.37 | -0.01 | -2.36   | 4.E-08 |
| P02545 | EDLQELNDRLAVYIDRVRSLETENAGLRLRITESEEVVSREVS<br>GIK                                                    | 5298.77 | 5298.78 | -0.01 | -2.34   | 4.E-08 |
| Q09666 | ISMPDIDLNLKGP                                                                                         | 1543.64 | 1539.83 | 3.81  | 2471.27 | 4.E-08 |
| P14866 | NPNGPYPYTLK                                                                                           | 1265.62 | 1262.63 | 2.99  | 2361.59 | 4.E-08 |
| P14866 | NPNGPYPYTLK                                                                                           | 1266.65 | 1262.63 | 4.02  | 3169.85 | 4.E-08 |
| A5PLR1 | STELLIRKLPFQRLVREIAQDFKTDLRFQSSAVMALQEACEAY<br>LVGLFEDTNLCAIHA                                        | 6736.48 | 6738.51 | -2.03 | -300.80 | 4.E-08 |
| Q2TA72 | (51)SFPPHLNRPPMGIPALPPGIPPPQFPGFPPVPPGTPMIP<br>VPMSIMAPAPTVLVPTVSMVGK                                 | 6431.42 | 6403.40 | 28.02 | 4356.38 | 4.E-08 |
| P46778 | RQPAPPREAHFVRTNGKEPELLEPIPYEFMA                                                                       | 3618.84 | 3618.84 | 0.00  | 0.61    | 4.E-08 |
| P61978 | RSRNTDEMVELRILLQSK                                                                                    | 2187.18 | 2187.18 | 0.00  | -0.12   | 5.E-08 |
| Q9Y4Y9 | (41)AANATTNPSQLLPLELVDKICGSRIHIVMKSDKEIVGTLLG<br>FDDFVNMVLEDVTEFEITPEGRRITKLDQILLNGNITMLVPG<br>GEGPEV | 9842.10 | 9842.10 | 0.00  | -0.47   | 5.E-08 |
| Q53HU8 | LLEGEESRISLPLPNFSSLNLRNLDLPLVDTHSK                                                                    | 4133.15 | 4133.16 | -0.01 | -3.31   | 5.E-08 |
| P11940 | GFGFVSFERHEDAQK                                                                                       | 1758.79 | 1752.82 | 5.97  | 3393.73 | 5.E-08 |
| Q15149 | ESYSALMRELELK                                                                                         | 1568.79 | 1567.79 | 1.00  | 638.34  | 5.E-08 |
| P07355 | VLIRIMVSRSEVDMLK                                                                                      | 1888.06 | 1888.06 | 0.00  | -1.74   | 5.E-08 |

|        |                                 |         |         |       |          |        |
|--------|---------------------------------|---------|---------|-------|----------|--------|
| P46778 | RQPAPPREAHFVRTNGKEPELLEPIPYEFMA | 3619.82 | 3618.84 | 0.98  | 270.60   | 6.E-08 |
| P62805 | RISGLIYEETRGVLK                 | 1732.98 | 1732.98 | 0.00  | -0.89    | 6.E-08 |
| P60866 | RLIDLHSPSEIVK                   | 1509.73 | 1505.86 | 3.87  | 2565.40  | 6.E-08 |
| P62805 | RISGLIYEETRGVLK                 | 1732.97 | 1732.98 | -0.01 | -3.48    | 6.E-08 |
| Q12905 | RNQLDAPNSAEQASILSLVTK           | 2254.19 | 2254.19 | 0.00  | -0.49    | 6.E-08 |
| P16401 | ATGPPVSELITK                    | 1211.68 | 1211.68 | 0.00  | -0.35    | 7.E-08 |
| P62805 | RISGLIYEETRGVLK                 | 1732.95 | 1732.98 | -0.03 | -19.47   | 7.E-08 |
| Q96QV6 | LLGGVTIAQGGVLPNIQAVLLPK         | 2270.32 | 2270.37 | -0.05 | -23.31   | 8.E-08 |
| Q96QV6 | LLGGVTIAQGGVLPNIQAVLLPK         | 2270.36 | 2270.37 | -0.01 | -2.96    | 8.E-08 |
| A6NJM3 | RSIITSREIQTAVRLLPGELAK          | 2560.52 | 2563.52 | -3.00 | -1172.23 | 8.E-08 |
| P07355 | GRRRAEDGSVIDYELIDQDARDLYDAGVK   | 3138.52 | 3138.52 | 0.00  | -1.41    | 8.E-08 |
| P07355 | VLIRIMVSRSEVDMLK                | 1888.04 | 1888.06 | -0.02 | -12.97   | 8.E-08 |
| P07355 | VLIRIMVSRSEVDMLK                | 1888.06 | 1888.06 | 0.00  | -0.79    | 8.E-08 |
| P69905 | VGAHAGEYGAEALERMFLSFPTTK        | 2581.26 | 2581.26 | 0.00  | -1.26    | 8.E-08 |
| Q71UI9 | ATIAGGGVIPHIHK                  | 1369.78 | 1369.78 | 0.00  | 0.89     | 9.E-08 |



|        |                                                                                     |         |         |        |          |        |
|--------|-------------------------------------------------------------------------------------|---------|---------|--------|----------|--------|
| Q71UI9 | ATIAGGGVIPHIHK                                                                      | 1373.70 | 1369.78 | 3.92   | 2855.51  | 9.E-08 |
| Q71UI9 | ATIAGGGVIPHIHK                                                                      | 1373.72 | 1369.78 | 3.94   | 2868.06  | 9.E-08 |
| P62750 | SAPRRNKLDHYAIKFPLTTESAMK                                                            | 2887.55 | 2886.55 | 1.00   | 344.90   | 9.E-08 |
| P68431 | DIQLARRIRGERA                                                                       | 1552.87 | 1552.89 | -0.02  | -15.50   | 9.E-08 |
| P68431 | DIQLARRIRGERA                                                                       | 1552.89 | 1552.89 | 0.00   | -1.08    | 9.E-08 |
| P36578 | GHRIEEVPELPLVVEDKVEGYKK                                                             | 2658.33 | 2662.43 | -4.10  | -1540.68 | 1.E-07 |
| P33778 | AMGIMNSFVNDIFERIAGEASRLAHYNK                                                        | 3153.54 | 3153.55 | -0.01  | -2.75    | 1.E-07 |
| P33778 | AMGIMNSFVNDIFERIAGEASRLAHYNK                                                        | 3155.50 | 3153.55 | 1.95   | 616.56   | 1.E-07 |
| Q9Y3U8 | ALRYPMAVGLNK                                                                        | 1331.74 | 1331.74 | 0.00   | -0.87    | 1.E-07 |
| A5PLR1 | STELLIRKLPFQRLVREIAQDFKTDLRFQSSAVMALQEACEAY<br>LVGLFEDTNLCAIHAKRVTIMPKDIQLARRIRGERA | 9098.94 | 9098.88 | 0.06   | 6.08     | 1.E-07 |
| P08865 | (51)SGALDVLQMKEEDVLK                                                                | 1815.93 | 1815.93 | 0.00   | -1.61    | 1.E-07 |
| Q16695 | QLAT(55)KVARKSAPATGGVK                                                              | 1807.00 | 1824.06 | -17.06 | -9442.71 | 1.E-07 |
| Q16695 | QLAT(55)KVARKSAPATGGVK                                                              | 1807.03 | 1824.06 | -17.03 | -9424.38 | 1.E-07 |
| P05787 | LSELEAALQRAK                                                                        | 1327.75 | 1327.75 | 0.00   | -1.08    | 1.E-07 |
| P16401 | ATGPPVSELITK                                                                        | 1211.67 | 1211.68 | -0.01  | -11.58   | 1.E-07 |

|        |                                     |         |         |        |           |        |
|--------|-------------------------------------|---------|---------|--------|-----------|--------|
| P05783 | ETMQSLNDRLASYLDRVRSLETENRRLESK      | 3607.76 | 3608.83 | -1.07  | -295.36   | 1.E-07 |
| P19338 | GIAYIEFKTEADA EK                    | 1683.84 | 1683.84 | 0.00   | -0.37     | 1.E-07 |
| Q53HU8 | VELQELNDRFANYIDK                    | 1965.98 | 1965.98 | 0.00   | -1.92     | 1.E-07 |
| P05783 | ETMQSLNDRLASYLDRVRSLETENRRLESK      | 3608.82 | 3608.83 | -0.01  | -1.52     | 1.E-07 |
| P04908 | LLGRVTIAQGGVLPNIQAVLLPK             | 2369.44 | 2369.45 | -0.01  | -3.91     | 1.E-07 |
| P08621 | (52)TQFLPPNLLALFAPRDPIPYLPPLEKLPHEK | 3606.99 | 3606.00 | 0.99   | 274.73    | 1.E-07 |
| P68431 | DIQLARRIGERA                        | 1548.62 | 1552.89 | -4.27  | -2759.93  | 1.E-07 |
| Q15427 | (41)AAGPISERNQDATVYVGGGLDEK         | 2338.51 | 2331.13 | 7.38   | 3155.23   | 2.E-07 |
| P68431 | DIQLARRIGERA                        | 1552.86 | 1552.89 | -0.03  | -16.73    | 2.E-07 |
| P68431 | DIQLARRIGERA                        | 1552.89 | 1552.89 | 0.00   | -0.31     | 2.E-07 |
| O60506 | ALLERTGYTLDVTTGQRK                  | 2021.09 | 2021.09 | 0.00   | -1.89     | 2.E-07 |
| O60506 | ALLERTGYTLDVTTGQRK                  | 2021.93 | 2021.09 | 0.84   | 415.23    | 2.E-07 |
| Q9P0L0 | FKGPFTDVVTTNLK                      | 1568.81 | 1565.85 | 2.96   | 1883.85   | 2.E-07 |
| O60812 | QKVDSLLENLEK                        | 1397.72 | 1414.77 | -17.05 | -12197.30 | 2.E-07 |
| O60812 | QKVDSLLENLEK                        | 1397.74 | 1414.77 | -17.03 | -12181.80 | 2.E-07 |

|        |                                                                    |         |         |        |          |        |
|--------|--------------------------------------------------------------------|---------|---------|--------|----------|--------|
| P23396 | FVDGLMIHSGDPVNYVDTAVRHVLLRQGVLGIK                                  | 3781.00 | 3781.01 | -0.01  | -2.54    | 2.E-07 |
| P68104 | NVSV(74)KDVRRGNVAGDSKNDPPMEAAGFTAQVIILNHPGQ<br>ISAGYAPVLDCHTAHIACK | 6092.04 | 6095.08 | -3.04  | -498.29  | 2.E-07 |
| Q15233 | EREQPPRFAQPGSFYEYAMRWK                                             | 2901.37 | 2901.37 | 0.00   | 1.57     | 2.E-07 |
| Q71DI3 | TDLRFQSSAVMALQEASEAYLVGLFEDTNLCAIHAK                               | 4074.91 | 3940.93 | 133.98 | 32878.80 | 2.E-07 |
| O95271 | QVTELLLRKGANVNEKNK                                                 | 2038.17 | 2053.16 | -14.99 | -7353.41 | 2.E-07 |
| P22626 | RGFGFVTFDDHDPVDK                                                   | 1850.85 | 1850.86 | -0.01  | -2.87    | 2.E-07 |
| P36578 | MINTDLSRILK                                                        | 1302.73 | 1302.73 | 0.00   | -2.11    | 2.E-07 |
| P51991 | GGSFGRSSGSPYGGGYGSGGGSGGYGSRRF                                     | 2831.24 | 2831.24 | 0.00   | -0.59    | 2.E-07 |
| P62805 | TVTAMDVVYALK                                                       | 1310.67 | 1309.70 | 0.97   | 741.11   | 2.E-07 |
| Q9P0L0 | FKGPFTDVVTTNLK                                                     | 1565.85 | 1565.85 | 0.00   | -1.67    | 2.E-07 |
| Q9UMS4 | TLQLDNNFEVK                                                        | 1319.67 | 1319.67 | 0.00   | -0.84    | 2.E-07 |
| P26373 | LILFPRKPSAPK                                                       | 1365.85 | 1365.85 | 0.00   | -1.39    | 3.E-07 |
| P18859 | LFVDKIREYK                                                         | 1309.74 | 1309.74 | 0.00   | 2.22     | 3.E-07 |
| P10412 | (51)SETAPAAPAAPAEKTPVKK                                            | 2073.11 | 2073.11 | 0.00   | 0.73     | 3.E-07 |
| P47914 | LDRLAYIAHPK                                                        | 1295.73 | 1295.73 | 0.00   | -1.06    | 3.E-07 |

|        |                                           |         |         |       |          |        |
|--------|-------------------------------------------|---------|---------|-------|----------|--------|
| P47914 | LDRLAYIAHPK                               | 1299.75 | 1295.73 | 4.02  | 3089.07  | 3.E-07 |
| P08865 | RKSDGIYIINLK                              | 1414.76 | 1418.82 | -4.06 | -2869.82 | 3.E-07 |
| P08865 | RKSDGIYIINLK                              | 1417.74 | 1418.82 | -1.08 | -760.87  | 3.E-07 |
| P08865 | RKSDGIYIINLK                              | 1418.82 | 1418.82 | 0.00  | -1.43    | 3.E-07 |
| P98179 | (51)SSEEGKLFVGGNLFNTDEQALEDHFSSFGPISEVVVK | 4153.03 | 4153.02 | 0.01  | 1.41     | 3.E-07 |
| O00422 | (41)AVESRVTQEEIK                          | 1429.74 | 1429.74 | 0.00  | -0.90    | 3.E-07 |
| O00422 | (41)AVESRVTQEEIK                          | 1434.61 | 1429.74 | 4.87  | 3391.53  | 3.E-07 |
| P62805 | TVTAMDVVYALK                              | 1309.70 | 1309.70 | 0.00  | -2.41    | 3.E-07 |
| P62805 | TVTAMDVVYALK                              | 1312.70 | 1309.70 | 3.00  | 2281.99  | 3.E-07 |
| P62805 | TVTAMDVVYALK                              | 1314.67 | 1309.70 | 4.97  | 3778.72  | 3.E-07 |
| P39019 | DQDGGKRKLTQQQRDLRIAGQVAAANK               | 2977.53 | 2977.54 | -0.01 | -2.43    | 3.E-07 |
| P22626 | RGFGFVTFFDDHDPVVK                         | 1854.05 | 1850.86 | 3.19  | 1722.97  | 3.E-07 |
| P62805 | TVTAMDVVYALK                              | 1309.65 | 1309.70 | -0.05 | -37.46   | 3.E-07 |
| P62805 | TVTAMDVVYALK                              | 1309.66 | 1309.70 | -0.04 | -30.28   | 3.E-07 |
| P62917 | DIHDPGRGAPLAK                             | 1456.79 | 1458.79 | -2.00 | -1370.04 | 4.E-07 |

|        |                                                                                |         |         |       |          |        |
|--------|--------------------------------------------------------------------------------|---------|---------|-------|----------|--------|
| P62917 | DIHDPGRGAPLAK                                                                  | 1458.79 | 1458.79 | 0.00  | -0.87    | 4.E-07 |
| P18621 | GLDVDSLVIHQVQNK                                                                | 1777.96 | 1777.96 | 0.00  | -0.72    | 4.E-07 |
| P09651 | (51)SKSESPKEPEQLRK                                                             | 1683.88 | 1683.88 | 0.00  | -0.28    | 4.E-07 |
| P60709 | MTQIMFETFNTPAMYVAIQAVLSLYASGRRTTGIVMDSGDGVTH<br>TVPIYEGYALPHAILRLDLAGRDLTDYLMK | 8022.00 | 8022.02 | -0.02 | -2.00    | 4.E-07 |
| P60903 | PSQMEHAMETMMFTFHK                                                              | 2098.88 | 2081.88 | 17.00 | 8097.78  | 4.E-07 |
| P61978 | ALRTDYNASVSPDSSGPERILSISADIETIGEILK                                            | 3815.96 | 3815.98 | -0.02 | -3.98    | 5.E-07 |
| P62847 | QMVIDVLHPGK                                                                    | 1240.67 | 1235.67 | 5.00  | 4026.63  | 5.E-07 |
| P12956 | IQVTPPGFQLVFLPFADDK                                                            | 2133.15 | 2131.14 | 2.01  | 942.45   | 5.E-07 |
| P52597 | ATENDIYNFFSPLNPVVRVHIEIGPDGRVTGEADVEFATHEEAV<br>AAMSK                          | 5241.52 | 5242.53 | -1.01 | -193.58  | 6.E-07 |
| Q00839 | EVLAGRPLFPVHLCHNCAVEFNFGQK                                                     | 2922.44 | 2924.46 | -2.02 | -691.87  | 6.E-07 |
| P61513 | TVAGGAWTYNTTSAVTVK                                                             | 1825.92 | 1825.92 | 0.00  | -0.82    | 6.E-07 |
| O60812 | QKVDSLLENLEK                                                                   | 1410.76 | 1414.77 | -4.01 | -2839.98 | 6.E-07 |
| O60812 | QKVDSLLENLEK                                                                   | 1414.75 | 1414.77 | -0.02 | -15.72   | 6.E-07 |
| O60812 | QKVDSLLENLEK                                                                   | 1414.77 | 1414.77 | 0.00  | -1.44    | 6.E-07 |
| Q86V81 | AAVHYDRSGRSLGTADVHFERKADALK                                                    | 2969.52 | 2969.52 | 0.00  | -0.85    | 6.E-07 |

|        |                                                                                            |         |         |        |          |        |
|--------|--------------------------------------------------------------------------------------------|---------|---------|--------|----------|--------|
| P07910 | RSAAEMYGSVTEHPSPLSSSFDLDYDFQRDYYDRMYSY<br>PARVPPPPPIARAVVPSKRQRVSGNTSRRGKSGFNKSGQR<br>GSSK | 9567.60 | 9565.74 | 1.86   | 194.28   | 6.E-07 |
| P06748 | TPKGPSSVEDIK                                                                               | 1256.66 | 1256.66 | 0.00   | -0.96    | 6.E-07 |
| P02545 | QREFESRLADALQELRAQHEDQVEQYKK                                                               | 3443.71 | 3443.72 | -0.01  | -2.54    | 7.E-07 |
| P06748 | TPKGPSSVEDIK                                                                               | 1256.64 | 1256.66 | -0.02  | -18.70   | 7.E-07 |
| P06748 | TPKGPSSVEDIK                                                                               | 1261.58 | 1256.66 | 4.92   | 3903.18  | 7.E-07 |
| P05204 | VKDEPQRRSARLSAKPAPPKPEPKPK                                                                 | 2906.66 | 2906.66 | 0.00   | -0.23    | 7.E-07 |
| P05783 | IMADIRAQYDELARK                                                                            | 1791.93 | 1791.93 | 0.00   | -0.85    | 7.E-07 |
| Q71UI9 | ATIAGGGVIPHIHK                                                                             | 1412.78 | 1369.78 | 43.00  | 30439.30 | 7.E-07 |
| Q71UI9 | ATIAGGGVIPHIHK                                                                             | 1416.85 | 1369.78 | 47.07  | 33222.80 | 7.E-07 |
| P49755 | GTGRIPDQLVILDMK                                                                            | 1649.92 | 1654.91 | -4.99  | -3025.55 | 7.E-07 |
| P49755 | GTGRIPDQLVILDMK                                                                            | 1654.91 | 1654.91 | 0.00   | -0.36    | 7.E-07 |
| Q86V81 | AAVHYDRSGRSLGTADVHFERKADALK                                                                | 2969.52 | 2969.52 | 0.00   | -1.09    | 7.E-07 |
| P05783 | VIDDTNITRLQLETEIEALKEELLFMK                                                                | 3203.69 | 3203.70 | -0.01  | -2.77    | 7.E-07 |
| P33778 | AMGIMNSFVNDIFERIAGEASRLAHYNK                                                               | 3154.52 | 3153.55 | 0.97   | 308.20   | 7.E-07 |
| A2BDF6 | STELLIRKLPFQRLVREIAQDFKTDLRFQSSAVMALQEASEAYL<br>VGLFEDTNLCAIHAK                            | 6898.53 | 6722.54 | 175.99 | 25510.50 | 8.E-07 |

|        |                                      |         |         |        |          |        |
|--------|--------------------------------------|---------|---------|--------|----------|--------|
| P63261 | (44)EEEEIALVIDNGSGMCK                | 1953.81 | 1819.83 | 133.98 | 68574.10 | 8.E-07 |
| O43390 | VLFVRNLATTVTTEEILEK                  | 2074.17 | 2074.17 | 0.00   | -0.95    | 8.E-07 |
| Q71DI3 | TDLRFQSSAVMALQEASEAYLVGLFEDTNLCAIHAK | 4074.89 | 3940.93 | 133.96 | 32875.40 | 8.E-07 |
| Q71DI3 | TDLRFQSSAVMALQEASEAYLVGLFEDTNLCAIHAK | 4075.81 | 3940.93 | 134.88 | 33092.30 | 8.E-07 |
| O75152 | LSVQSNPSPQLRSVMK                     | 1766.86 | 1769.95 | -3.09  | -1747.28 | 9.E-07 |
| Q9Y6C9 | EVSSSFHDHVIK                         | 1241.65 | 1246.62 | -4.97  | -4005.53 | 9.E-07 |
| Q9Y6C9 | EVSSSFHDHVIK                         | 1243.62 | 1246.62 | -3.00  | -2411.30 | 9.E-07 |
| Q9Y6C9 | EVSSSFHDHVIK                         | 1246.62 | 1246.62 | 0.00   | 1.01     | 9.E-07 |
| P07355 | LSLEGDHSTPPSAYGSVK                   | 1843.90 | 1843.90 | 0.00   | 1.42     | 9.E-07 |
| P07355 | LSLEGDHSTPPSAYGSVK                   | 1847.85 | 1843.90 | 3.95   | 2137.69  | 9.E-07 |
| P33778 | RSTITSREIQTAVRLLLLPGELAK             | 2593.32 | 2551.48 | 41.84  | 16134.50 | 9.E-07 |
| P33778 | RSTITSREIQTAVRLLLLPGELAK             | 2594.44 | 2551.48 | 42.96  | 16558.40 | 9.E-07 |
| P33778 | RSTITSREIQTAVRLLLLPGELAK             | 2594.48 | 2551.48 | 43.00  | 16574.10 | 9.E-07 |
| P60709 | LCYVALDFEQEMATAASSSSLEK              | 2500.26 | 2492.15 | 8.11   | 3244.04  | 9.E-07 |
| P60709 | LCYVALDFEQEMATAASSSSLEK              | 2500.78 | 2492.15 | 8.63   | 3451.82  | 9.E-07 |

|        |                                                     |         |         |        |          |        |
|--------|-----------------------------------------------------|---------|---------|--------|----------|--------|
| Q99880 | AMGIMNSFVNDIFERIASEASRLAHYNK                        | 3183.55 | 3183.56 | -0.01  | -2.05    | 1.E-06 |
| P62750 | AYVRLAPDYDALDVANKIGII                               | 2289.23 | 2289.24 | -0.01  | -2.85    | 1.E-06 |
| P62805 | VFLENVIRDAVITYTEHAK                                 | 2147.10 | 2104.10 | 43.00  | 20027.50 | 1.E-06 |
| P19338 | TLVLSNLSYSATEETLQEVFEK                              | 2500.25 | 2500.26 | -0.01  | -4.17    | 1.E-06 |
| Q9Y6C9 | EVSSSFHDHVIK                                        | 1247.65 | 1246.62 | 1.03   | 828.40   | 1.E-06 |
| Q9Y6C9 | EVSSSFHDHVIK                                        | 1249.60 | 1246.62 | 2.98   | 2381.61  | 1.E-06 |
| P14866 | DFSESRRNRFSTPEQAAK                                  | 2082.97 | 2082.97 | 0.00   | -1.72    | 1.E-06 |
| Q9UKV3 | RRWGASTATTQKKPSISITTESLK                            | 2646.45 | 2646.45 | 0.00   | 1.29     | 1.E-06 |
| Q16891 | SLEDALRQTASVTLQAIQAQNAAVQAVNAHSNILK                 | 3615.92 | 3615.93 | -0.01  | -1.50    | 1.E-06 |
| P08670 | ARVEVERDNLAEDIMRLREK                                | 2441.28 | 2441.28 | 0.00   | -1.66    | 1.E-06 |
| Q548L2 | LQEEMLQREEAENTLQSFRQDVDNASLARLDLERKVESLQE<br>EIAFLK | 5560.79 | 5560.81 | -0.02  | -2.75    | 1.E-06 |
| P31949 | KLDTNSDGQLDFSEFLNLIGGLAMACHDSFLK                    | 3632.66 | 3498.68 | 133.98 | 36881.40 | 2.E-06 |
| P0C0S8 | TRIIPRHLQLAIRNDEELNK                                | 2428.38 | 2428.37 | 0.01   | 2.79     | 2.E-06 |
| P62906 | KYDAFLASESLIK                                       | 1483.79 | 1483.79 | 0.00   | -2.37    | 2.E-06 |
| P62851 | IRGSLARAALQELLSK                                    | 1725.03 | 1725.03 | 0.00   | -1.43    | 2.E-06 |



|        |                                                                                                    |         |         |       |         |        |
|--------|----------------------------------------------------------------------------------------------------|---------|---------|-------|---------|--------|
| Q16695 | QLATKVARKSAPATGGV(55)KKPHRYRPGTVALREIRRYQK                                                         | 4343.50 | 4329.49 | 14.01 | 3225.80 | 2.E-06 |
| P62841 | HGRPGIGATHSSRFIPLK                                                                                 | 1930.06 | 1930.06 | 0.00  | 1.09    | 2.E-06 |
| Q9Y4Y9 | AANATTNPSQLLPLELVDKCIGSRIHIVMKSDKEIVGTLLGFDD<br>FVNMVLEDVTEFEITPEGRRITKLDQILLNGNNITMLVPGGEG<br>PEV | 9842.10 | 9800.09 | 42.01 | 4267.95 | 2.E-06 |
| A6NCA2 | PRNQGGYGGSSSSSSCVSGRRF                                                                             | 2250.01 | 2232.01 | 18.00 | 8000.71 | 2.E-06 |
| P62857 | GPVREGDVLTLLESEREARRLR                                                                             | 2552.40 | 2550.40 | 2.00  | 784.33  | 2.E-06 |
| P33778 | RSTITSREIQTAVRLLLPGELA(55)K                                                                        | 2594.48 | 2593.49 | 0.99  | 381.57  | 2.E-06 |
| Q09666 | ISMPDVDLHLK                                                                                        | 1266.66 | 1266.66 | 0.00  | -1.01   | 2.E-06 |
| P09651 | RSRGGFVYATVEEVDAAMNARPHKVDGRVVEPK                                                                  | 3887.98 | 3887.99 | -0.01 | -2.15   | 2.E-06 |
| P60953 | TPFLLVGTQIDLRDDPSTIEK                                                                              | 2357.25 | 2357.25 | 0.00  | 0.81    | 2.E-06 |
| P33778 | RSTITSREIQTAVRLLLPGELA(55)K                                                                        | 2594.44 | 2593.49 | 0.95  | 365.66  | 2.E-06 |
| Q9Y230 | TAIAMGMAQALGPDTPFTAAGSEIFSLEMSK                                                                    | 3263.46 | 3255.59 | 7.87  | 2412.56 | 2.E-06 |
| Q9Y230 | TAIAMGMAQALGPDTPFTAAGSEIFSLEMSK                                                                    | 3269.60 | 3255.59 | 14.01 | 4284.72 | 2.E-06 |
| P07910 | TDPRSMNSRVFIGNLNTLVVK                                                                              | 2360.26 | 2360.26 | 0.00  | -1.58   | 2.E-06 |
| P07910 | TDPRSMNSRVFIGNLNTLVVK                                                                              | 2361.23 | 2360.26 | 0.97  | 411.55  | 2.E-06 |
| Q9Y230 | IAGRAVLIAGQP GTGK                                                                                  | 1507.88 | 1507.88 | 0.00  | -1.93   | 2.E-06 |

|        |                                               |         |         |        |          |        |
|--------|-----------------------------------------------|---------|---------|--------|----------|--------|
| Q9Y230 | IAGRAVLIAGQP GTGK                             | 1509.88 | 1507.88 | 2.00   | 1326.98  | 2.E-06 |
| P04908 | LLGRVTIAQGGVLPNIQAVLLPKKTESHK                 | 3344.92 | 3216.88 | 128.04 | 38278.60 | 3.E-06 |
| P05783 | GLQAQIASSGLTVEVDAPK                           | 1883.00 | 1883.00 | 0.00   | -2.05    | 3.E-06 |
| P61254 | MKFNPVFTSDRSK                                 | 1555.78 | 1555.78 | 0.00   | -1.66    | 3.E-06 |
| P61254 | MKFNPVFTSDRSK                                 | 1559.85 | 1555.78 | 4.07   | 2610.70  | 3.E-06 |
| Q09028 | TPSSDVLVFDYTK                                 | 1470.72 | 1470.72 | 0.00   | -1.02    | 3.E-06 |
| P61313 | FFEVLIDPFHK                                   | 1502.76 | 1503.81 | -1.05  | -698.14  | 3.E-06 |
| P61313 | FFEVLIDPFHK                                   | 1503.81 | 1503.81 | 0.00   | -1.43    | 3.E-06 |
| Q969X6 | IYKPLLFMDLLDERTLVAVERPLDDIIAQLPPIK            | 4049.93 | 4044.27 | 5.66   | 1397.27  | 3.E-06 |
| P33778 | AMGIMNSFVNDIFERIAGEASRLAHYNK                  | 3196.51 | 3153.55 | 42.96  | 13439.60 | 3.E-06 |
| P33778 | AMGIMNSFVNDIFERIAGEASRLAHYNK                  | 3196.55 | 3153.55 | 43.00  | 13452.00 | 3.E-06 |
| Q504R3 | NFFWMTDQEIQLDWQWRK                            | 2539.19 | 2541.19 | -2.00  | -788.25  | 3.E-06 |
| P09651 | LFIGGLSFETTDESLRSHFEQWGTLDTCVVMRDPNTK         | 4229.01 | 4229.02 | -0.01  | -2.58    | 3.E-06 |
| Q53HU8 | LLEGEESRISLPLPNFSSLNLRNLDLPLVDTHSK            | 4133.15 | 4133.16 | -0.01  | -3.21    | 3.E-06 |
| Q9P0L0 | VAHSDKPGSTSTASFRDNVTSP LPSLLVIAAIFIGFFLGK FIL | 4632.44 | 4632.54 | -0.10  | -21.60   | 4.E-06 |

|        |                                             |         |         |       |          |        |
|--------|---------------------------------------------|---------|---------|-------|----------|--------|
| Q9P0L0 | VAHSDKPGSTSTASFRDNVTSPLPSLLVIAAIFIGFFLGKFIL | 4632.54 | 4632.54 | 0.00  | 0.40     | 4.E-06 |
| P0C0S8 | TRIIPRHLQLAIRNDEELNK                        | 2428.31 | 2428.37 | -0.06 | -25.59   | 4.E-06 |
| P0C0S8 | TRIIPRHLQLAIRNDEELNK                        | 2428.37 | 2428.37 | 0.00  | -0.88    | 4.E-06 |
| Q09028 | TPSSDVLVFDYTK                               | 1474.62 | 1470.72 | 3.90  | 2645.96  | 4.E-06 |
| P0C0S8 | TRIIPRHLQLAIRNDEELNK                        | 2428.33 | 2428.37 | -0.04 | -17.15   | 4.E-06 |
| P0C0S8 | TRIIPRHLQLAIRNDEELNK                        | 2428.37 | 2428.37 | 0.00  | -1.54    | 4.E-06 |
| P69905 | VGAHAGEYGAEALERMFLSFPTTK                    | 2581.26 | 2581.26 | 0.00  | -1.30    | 4.E-06 |
| P62805 | TVTAMDVVYALK                                | 1352.70 | 1309.70 | 43.00 | 31791.60 | 4.E-06 |
| P33778 | AMGIMNSFVNDIFERIAGEASRLAHYNK                | 3154.52 | 3153.55 | 0.97  | 308.93   | 4.E-06 |
| P33778 | AMGIMNSFVNDIFERIAGEASRLAHYNK                | 3156.47 | 3153.55 | 2.92  | 924.08   | 4.E-06 |
| P02545 | RTLEGELHDLRGQVAKLEAALGEAKK                  | 2832.56 | 2831.56 | 1.00  | 353.26   | 4.E-06 |
| P61978 | ALRTDYNASVSPDSSGPERILSISADIETIGEILK         | 3815.97 | 3815.98 | -0.01 | -2.39    | 5.E-06 |
| P05783 | IMADIRAQYDELARK                             | 1791.93 | 1791.93 | 0.00  | -2.13    | 5.E-06 |
| P39019 | DQDGGKRLTPQGQRDLRIAGQVAAANKKH               | 3242.71 | 3242.70 | 0.01  | 2.31     | 5.E-06 |
| P33778 | AMGIMNSFVNDIFERIAGEASRLAHYNK                | 3169.54 | 3153.55 | 15.99 | 5043.94  | 5.E-06 |

|        |                                         |         |         |       |         |        |
|--------|-----------------------------------------|---------|---------|-------|---------|--------|
| Q9NW13 | TVFIRNLSFDSEEEELGELLQQFGELK             | 3170.52 | 3169.58 | 0.94  | 295.64  | 5.E-06 |
| Q99729 | NEEDAGKMFVGGLSWDTSKK                    | 2196.18 | 2198.03 | -1.85 | -844.08 | 5.E-06 |
| P68431 | DIQLARRIRGERA                           | 1552.89 | 1552.89 | 0.00  | -1.08   | 5.E-06 |
| P09651 | RGFAFVTFDHDSVDK                         | 1854.85 | 1854.85 | 0.00  | -2.23   | 5.E-06 |
| Q00839 | AVVVCPKDEDYK                            | 1364.66 | 1364.66 | 0.00  | -0.42   | 6.E-06 |
| P61313 | AIRRNPDQTWITKPVHK                       | 2059.14 | 2059.14 | 0.00  | 0.05    | 6.E-06 |
| P22626 | KLFVGGIKEDTEHHLRDYFEEYGKIDTIEIITDRQSGKK | 4736.41 | 4736.41 | 0.00  | -0.80   | 6.E-06 |
| P05387 | MRYVASYLALGNGSSPSAK                     | 2155.10 | 2155.11 | -0.01 | -2.90   | 7.E-06 |
| P09651 | RGFAFVTFDHDSVDK                         | 1857.85 | 1854.85 | 3.00  | 1616.74 | 7.E-06 |
| P09651 | RGFAFVTFDHDSVDK                         | 1858.37 | 1854.85 | 3.52  | 1892.18 | 7.E-06 |
| Q01082 | AEHERELALRNELIRQEK                      | 2234.19 | 2233.19 | 1.00  | 447.95  | 7.E-06 |
| P05787 | TEISEMNRNISRQLQAEIEGLK                  | 2430.24 | 2430.25 | -0.01 | -3.31   | 7.E-06 |
| Q71UI9 | RITPRHLQLAIRGDEELDSLIIK                 | 2572.44 | 2572.44 | 0.00  | -0.57   | 7.E-06 |
| Q01130 | VDNLTYRTSPDTRLRRVFEK                    | 2309.21 | 2309.21 | 0.00  | -0.63   | 7.E-06 |
| P04083 | GLGTDEDTLIEILASRTNK                     | 2045.03 | 2045.06 | -0.03 | -14.83  | 7.E-06 |

|        |                                                                                                                                                                      |          |          |       |          |        |
|--------|----------------------------------------------------------------------------------------------------------------------------------------------------------------------|----------|----------|-------|----------|--------|
| Q09666 | FKMPEMHFKAPK                                                                                                                                                         | 1489.76  | 1489.76  | 0.00  | 1.29     | 7.E-06 |
| P08729 | VDALNDEINFLRTLNETELTELQSQISDTSVVLSMDNSRSLDL<br>DGIIAEVK                                                                                                              | 5662.83  | 5662.84  | -0.01 | -1.35    | 8.E-06 |
| P68431 | DIQLARRIRGERA                                                                                                                                                        | 1552.87  | 1552.89  | -0.02 | -15.89   | 8.E-06 |
| P68431 | DIQLARRIRGERA                                                                                                                                                        | 1552.89  | 1552.89  | 0.00  | 1.63     | 8.E-06 |
| P05787 | TEISEMNRNISRLQAEIEGLK                                                                                                                                                | 2427.10  | 2430.25  | -3.15 | -1298.32 | 8.E-06 |
| P07910 | ELTQIKQKVDLLENLEK                                                                                                                                                    | 2123.17  | 2127.18  | -4.01 | -1889.52 | 8.E-06 |
| Q9NR30 | DAIRLLDSVPPTAISHFK                                                                                                                                                   | 1979.08  | 1979.08  | 0.00  | -0.74    | 9.E-06 |
| Q9NR30 | DAIRLLDSVPPTAISHFK                                                                                                                                                   | 1982.87  | 1979.08  | 3.79  | 1909.67  | 9.E-06 |
| P62807 | RSRKESYSVYVYKVLKQVHPDTGISS(75)KAMGIMNSFVNDIF<br>ERIALGASRLAHYNK                                                                                                      | 6323.22  | 6317.26  | 5.96  | 943.02   | 9.E-06 |
| P05783 | KGPQVRDWSHYFK                                                                                                                                                        | 1646.83  | 1646.83  | 0.00  | 0.22     | 9.E-06 |
| Q00839 | AELMERLQAALDDEEAGGRPAMEPGNG(37)SLDLGGDSAGR<br>SGAGLEQEAAGGDEEEEEEEEEEGISALDGDQMELGEEN<br>GAAGAADSGPMEEEEAASEDENGDDQGFQEGEDELGDEEE<br>GAGDENGHGEEQQPQPATQQQQPQQQRGAAK | 15572.41 | 15570.50 | 1.91  | 122.40   | 9.E-06 |
| P46777 | ASFLRAQERAAES                                                                                                                                                        | 1434.72  | 1434.72  | 0.00  | -1.47    | 9.E-06 |
| A7E2U8 | KKTISNTFKPSSPGKK                                                                                                                                                     | 1793.01  | 1747.00  | 46.01 | 25662.50 | 9.E-06 |
| P33778 | AMGIMNSFVNDIFERIALGASRLAHYNK                                                                                                                                         | 3196.55  | 3153.55  | 43.00 | 13452.10 | 9.E-06 |
| P0C0S8 | TRIIPRHLQLAIRNDEELNK                                                                                                                                                 | 2428.37  | 2428.37  | 0.00  | -1.00    | 1.E-05 |

|        |                                                           |         |         |       |          |        |
|--------|-----------------------------------------------------------|---------|---------|-------|----------|--------|
| P0C0S8 | TRIIPRHLQLAIRNDEELNK                                      | 2432.39 | 2428.37 | 4.02  | 1651.17  | 1.E-05 |
| P04083 | GLGTDEDTLIEILASRTNK                                       | 2045.06 | 2045.06 | 0.00  | -1.48    | 1.E-05 |
| P62805 | RISGLIYEETRGLK                                            | 1736.68 | 1732.98 | 3.70  | 2132.89  | 1.E-05 |
| P0C0S8 | TRIIPRHLQLAIRNDEELNK                                      | 2429.34 | 2428.37 | 0.97  | 401.00   | 1.E-05 |
| Q15149 | ELIPTEEALRLLDLAQLATGGIVDPRLGFHLPLEVAYQRGYLNK              | 4788.60 | 4788.60 | 0.00  | -0.47    | 1.E-05 |
| P62805 | RISGLIYEETRGLK                                            | 1732.97 | 1732.98 | -0.01 | -4.06    | 1.E-05 |
| P62805 | RISGLIYEETRGLK                                            | 1734.95 | 1732.98 | 1.97  | 1135.80  | 1.E-05 |
| P14866 | VFSGKSERSSSGLLEWESKSDALETGLFLNHYQMK                       | 3959.92 | 3959.94 | -0.02 | -5.89    | 1.E-05 |
| P62899 | LYTLVTYVPVTTFK                                            | 1643.92 | 1643.92 | 0.00  | -1.66    | 1.E-05 |
| Q5XJ17 | (49)MSIMAPAPTVLVPTVSMVGK                                  | 2145.14 | 2070.09 | 75.05 | 34986.90 | 1.E-05 |
| Q14978 | RGAAGDWGERANQVLK                                          | 1726.89 | 1726.89 | 0.00  | -1.14    | 1.E-05 |
| Q14978 | RGAAGDWGERANQVLK                                          | 1727.96 | 1726.89 | 1.07  | 617.22   | 1.E-05 |
| O60506 | ALLERTGYTLDVTTGQRK                                        | 2021.09 | 2021.09 | 0.00  | -1.74    | 1.E-05 |
| O43390 | VAERLDEIFQTGLVAYVDLDERAIDALREFNEEGALSVLQQFK<br>ESDLSHVQNK | 6046.05 | 6047.06 | -1.01 | -166.28  | 1.E-05 |
| Q6FI13 | GNYAERVGAGAPVYMAAVLEYLTAEILELAGNAARDNKK                   | 4109.11 | 4108.11 | 1.00  | 243.90   | 1.E-05 |

|        |                                                                                   |         |         |        |           |        |
|--------|-----------------------------------------------------------------------------------|---------|---------|--------|-----------|--------|
| P33778 | RSTITSREIQTAVRLLLLPGELAK                                                          | 2551.40 | 2551.48 | -0.08  | -29.68    | 1.E-05 |
| O43933 | NKLD CDINK                                                                        | 965.49  | 1061.52 | -96.03 | -99463.20 | 1.E-05 |
| P0C0S8 | TRIIPRHLQLAIRNDEELNK                                                              | 2428.31 | 2428.37 | -0.06  | -25.26    | 1.E-05 |
| P0C0S8 | TRIIPRHLQLAIRNDEELNK                                                              | 2428.36 | 2428.37 | -0.01  | -2.16     | 1.E-05 |
| Q08211 | LAQFEPSQRQNQVGVVWSPQSNWNPWTSSNIDEGPLAF<br>ATPEQISMDLKNELMYQLEQDHDLDLQAILQERELLPVK | 8867.35 | 8867.37 | -0.02  | -2.69     | 1.E-05 |
| P33778 | RSTITSREIQTAVRLLLLPGELAK                                                          | 2551.47 | 2551.48 | -0.01  | -2.44     | 2.E-05 |
| P33778 | RSTITSREIQTAVRLLLLPGELAK                                                          | 2551.98 | 2551.48 | 0.50   | 194.15    | 2.E-05 |
| P05388 | AIRGHLENNPALEK                                                                    | 1560.85 | 1560.84 | 0.01   | 8.90      | 2.E-05 |
| P05388 | AIRGHLENNPALEK                                                                    | 1562.84 | 1560.84 | 2.00   | 1278.70   | 2.E-05 |
| P05388 | AIRGHLENNPALEK                                                                    | 1562.84 | 1560.84 | 2.00   | 1278.70   | 2.E-05 |
| P09651 | RGFAFVTFDHDSV DK                                                                  | 1854.85 | 1854.85 | 0.00   | -1.58     | 2.E-05 |
| P46013 | KADVEEEFLAFRK                                                                     | 1580.82 | 1580.82 | 0.00   | 1.51      | 2.E-05 |
| P46013 | KADVEEEFLAFRK                                                                     | 1584.77 | 1580.82 | 3.95   | 2492.34   | 2.E-05 |
| P33778 | AMGIMNSFVNDIFERIAGEASRLAHY NK                                                     | 3169.54 | 3153.55 | 15.99  | 5045.66   | 2.E-05 |
| P33778 | AMGIMNSFVNDIFERIAGEASRLAHY NK                                                     | 3173.55 | 3153.55 | 20.00  | 6303.29   | 2.E-05 |

|        |                                                                                                                                             |          |          |        |           |        |
|--------|---------------------------------------------------------------------------------------------------------------------------------------------|----------|----------|--------|-----------|--------|
| Q8N257 | RSTITSREVQTAVRLLLLPGELAK                                                                                                                    | 2537.47  | 2537.47  | 0.00   | -1.68     | 2.E-05 |
| P0C0S8 | TRIIPRHLQLAIRNDEELNK                                                                                                                        | 2428.34  | 2428.37  | -0.03  | -12.49    | 2.E-05 |
| P0C0S8 | TRIIPRHLQLAIRNDEELNK                                                                                                                        | 2431.35  | 2428.37  | 2.98   | 1224.12   | 2.E-05 |
| Q0VGL3 | FAYLGRLAHEVGVWKYQAVTATLEDKRKEK                                                                                                              | 3307.67  | 3406.81  | -99.14 | -29972.70 | 2.E-05 |
| P0C0S8 | TRIIPRHLQLAIRNDEELNK                                                                                                                        | 2428.37  | 2428.37  | 0.00   | 0.40      | 2.E-05 |
| P05388 | AIRGHLENNPALEK                                                                                                                              | 1558.66  | 1560.84  | -2.18  | -1396.07  | 2.E-05 |
| P05388 | AIRGHLENNPALEK                                                                                                                              | 1559.82  | 1560.84  | -1.03  | -657.13   | 2.E-05 |
| Q14978 | NKPGPYSSVPPPSAPPPK                                                                                                                          | 1815.95  | 1815.95  | 0.00   | -0.77     | 2.E-05 |
| Q14978 | NKPGPYSSVPPPSAPPPK                                                                                                                          | 1816.00  | 1815.95  | 0.05   | 25.11     | 2.E-05 |
| Q6DKI1 | (41)AEQEQRKIPLPENLLKK                                                                                                                       | 2174.00  | 2174.24  | -0.24  | -109.11   | 2.E-05 |
| P22626 | ALSRQEMQEVQSSRSRGGNFGFGDSRGGGGNFGPGPGS<br>NFRGGSDGYGSGRFGDGYNGYGGGPGGGNFGGSPGYG<br>GGRGGYGGGPGYGNQGGYGGGYDNYGGGNYGSGNY<br>NDFGNYNQQPSNYGPMK | 12761.44 | 12733.40 | 28.04  | 2197.37   | 2.E-05 |
| Q16695 | KPHRYRPGTVALREIRRYQK                                                                                                                        | 2523.44  | 2523.44  | 0.00   | -0.94     | 2.E-05 |
| P62318 | (51)SIGVPIKVLHEAEGHIVTCETNTGEVYRGKLI EAEDNMNC<br>QMSNITVTYRDGRVAQLEQVYIRGSKIRFLILPDMLKNAPMLK                                                | 9397.83  | 9397.84  | -0.01  | -0.63     | 2.E-05 |
| P60660 | EGNGTVMGAEIRHVLVTLGEK                                                                                                                       | 2210.13  | 2209.15  | 0.98   | 443.79    | 2.E-05 |
| Q01130 | (51)SYGRPPPDVEGMTSLK                                                                                                                        | 1774.86  | 1774.86  | 0.00   | -0.73     | 2.E-05 |



|        |                                                                                     |         |         |       |         |        |
|--------|-------------------------------------------------------------------------------------|---------|---------|-------|---------|--------|
| P51991 | IFVGGIKEDTEEYNLRDYFEK                                                               | 2564.23 | 2564.24 | -0.01 | -3.56   | 2.E-05 |
| Q8NC51 | PGHLQEGFGCVVTNRFDQLFDDSDPFEVLK                                                      | 3537.66 | 3537.65 | 0.01  | 2.43    | 2.E-05 |
| Q9Y5S9 | GYTLVEYETYK                                                                         | 1364.84 | 1364.65 | 0.19  | 137.10  | 3.E-05 |
| Q00839 | RNFILDQTNVSAAAQRRK                                                                  | 2087.13 | 2087.13 | 0.00  | -0.33   | 3.E-05 |
| A2BDF6 | STELLIRKLPFQRLVREIAQDFKTDLRFQSSAVMALQEASEAYL<br>VGLFEDTNLCAIHAKRVTIMPKDIQLARRIRGERA | 9082.92 | 9082.91 | 0.01  | 1.23    | 3.E-05 |
| Q00839 | EKPYFPIPEEYTFIQNVPLEDRVRGPKGPEEKK                                                   | 3929.03 | 3929.04 | -0.01 | -1.87   | 3.E-05 |
| P22626 | LFIGGLSFETTEESLRNYEQWGK                                                             | 2866.37 | 2866.38 | -0.01 | -2.63   | 3.E-05 |
| O43390 | VTEGLVDVILYHQPDDK                                                                   | 1939.99 | 1939.99 | 0.00  | -0.76   | 3.E-05 |
| P68431 | DIQLARRIRGERA                                                                       | 1553.87 | 1552.89 | 0.98  | 631.28  | 3.E-05 |
| P62857 | GPVREGDVLTLLESEREARRLR                                                              | 2549.34 | 2550.40 | -1.06 | -416.88 | 3.E-05 |
| P62857 | GPVREGDVLTLLESEREARRLR                                                              | 2550.40 | 2550.40 | 0.00  | 1.30    | 3.E-05 |
| P33778 | AMGIMNSFVNDIFERIAGEASRLAHYNK                                                        | 3154.48 | 3153.55 | 0.93  | 294.77  | 3.E-05 |
| P33778 | AMGIMNSFVNDIFERIAGEASRLAHYNK                                                        | 3154.53 | 3153.55 | 0.98  | 311.09  | 3.E-05 |
| P23246 | GGKMPGGPKPGGGPGLSTPGGHKPPHRGGGEPRGGRQH<br>HPPYHQHHQGGPPGGPGRSEEK                    | 6292.09 | 6292.09 | 0.00  | -0.70   | 3.E-05 |
| P68431 | DIQLARRIRGERA                                                                       | 1552.89 | 1552.89 | 0.00  | 3.17    | 4.E-05 |

|        |                                 |         |         |        |          |        |
|--------|---------------------------------|---------|---------|--------|----------|--------|
| A6NJM3 | RSIITSREIQTAVRLLLPGELAK         | 2558.84 | 2563.52 | -4.68  | -1827.67 | 4.E-05 |
| A6NJM3 | RSIITSREIQTAVRLLLPGELAK         | 2559.17 | 2563.52 | -4.35  | -1700.32 | 4.E-05 |
| A6NJM3 | RSIITSREIQTAVRLLLPGELAK         | 2562.44 | 2563.52 | -1.08  | -420.23  | 4.E-05 |
| A6NJM3 | RSIITSREIQTAVRLLLPGELAK         | 2562.55 | 2563.52 | -0.97  | -378.84  | 4.E-05 |
| P16403 | ASGPPVSELITK                    | 1197.66 | 1197.66 | 0.00   | -2.32    | 4.E-05 |
| P16403 | ASGPPVSELITK                    | 1198.16 | 1197.66 | 0.50   | 416.91   | 4.E-05 |
| P09874 | SLQELFLAHILSPWGAEVK             | 2137.16 | 2137.16 | 0.00   | 0.60     | 4.E-05 |
| Q9P013 | (52)TTAARPTFEPARGGRGKGEGDLSQLSK | 2828.46 | 2828.45 | 0.01   | 1.77     | 4.E-05 |
| P62424 | KQEAKKVVNPLFEK                  | 1656.96 | 1656.96 | 0.00   | -1.00    | 4.E-05 |
| P62424 | KQEAKKVVNPLFEK                  | 1660.84 | 1656.96 | 3.88   | 2334.46  | 4.E-05 |
| P06748 | (49)MEDSMDMDMSPLRPQNYLFGCELK    | 3025.21 | 2891.23 | 133.98 | 44287.40 | 4.E-05 |
| A6NG44 | (49)MGIMNSFVNDIFERIASEASRLAHYNK | 3154.53 | 3154.53 | 0.00   | -1.24    | 5.E-05 |
| Q09666 | FKMPEMHFKAPK                    | 1489.76 | 1489.76 | 0.00   | -1.53    | 5.E-05 |
| Q6P2Q9 | LWNLNNYRTDMIQALGGVEGILEHTLFK    | 3245.66 | 3244.67 | 0.99   | 305.84   | 5.E-05 |
| P20700 | NQNSWGTGEDVK                    | 1332.63 | 1333.59 | -0.96  | -717.79  | 6.E-05 |

|        |                                                  |         |         |       |         |        |
|--------|--------------------------------------------------|---------|---------|-------|---------|--------|
| P20700 | NQNSWGTGEDVK                                     | 1332.69 | 1333.59 | -0.90 | -671.68 | 6.E-05 |
| P20700 | NQNSWGTGEDVK                                     | 1333.59 | 1333.59 | 0.00  | -0.26   | 6.E-05 |
| P20700 | NQNSWGTGEDVK                                     | 1334.58 | 1333.59 | 0.99  | 739.00  | 6.E-05 |
| P22626 | RGFGFVTFDDHDPVDKIVLQK                            | 2432.25 | 2432.25 | 0.00  | -1.52   | 6.E-05 |
| P14866 | DFSESRRNRFSTPEQAAK                               | 2082.96 | 2082.97 | -0.01 | -2.44   | 6.E-05 |
| Q00839 | SSGPTSLFAVTVAPPGARQQQQAGGK                       | 2603.31 | 2596.34 | 6.97  | 2676.29 | 6.E-05 |
| P09651 | RSRGFGFVTYATVEEVDAAMNARPHKVDGRVVEPK              | 3887.98 | 3887.99 | -0.01 | -1.91   | 6.E-05 |
| O76021 | TVSQIISLQTLKK                                    | 1458.76 | 1457.88 | 0.88  | 605.02  | 6.E-05 |
| P68431 | DIQLARRIRGERA                                    | 1552.87 | 1552.89 | -0.02 | -15.63  | 6.E-05 |
| P68431 | DIQLARRIRGERA                                    | 1552.89 | 1552.89 | 0.00  | 0.66    | 6.E-05 |
| P62314 | NREPVQLETLSIRGNNIRYFILPDSLPLDTLLVDVEPK           | 4376.35 | 4376.37 | -0.02 | -4.02   | 6.E-05 |
| Q09666 | FGVSTGREGQTPK                                    | 1366.78 | 1362.69 | 4.09  | 2995.46 | 6.E-05 |
| P09651 | GGNFGGRSSGPYGGGGQYFAKPRNQGGYGGSSSSSSSYGS<br>GRRF | 4251.93 | 4251.92 | 0.01  | 1.87    | 6.E-05 |
| P08621 | (52)TQFLPPNLLALFAPRDPIPYLPPLEK                   | 3001.61 | 3001.67 | -0.06 | -19.98  | 7.E-05 |
| P08621 | (52)TQFLPPNLLALFAPRDPIPYLPPLEK                   | 3001.67 | 3001.67 | -0.01 | -1.65   | 7.E-05 |

|        |                                                           |         |         |       |          |        |
|--------|-----------------------------------------------------------|---------|---------|-------|----------|--------|
| P68431 | DIQLARRIRGERA                                             | 1552.86 | 1552.89 | -0.03 | -16.15   | 7.E-05 |
| P68431 | DIQLARRIRGERA                                             | 1552.89 | 1552.89 | 0.00  | 1.56     | 7.E-05 |
| P42704 | IPENIYRGIRNLESYHVPELIK                                    | 2765.52 | 2765.52 | 0.00  | -1.33    | 8.E-05 |
| P33778 | RSTITSREIQTAVRLLLPGELAKHAVSEGTK                           | 3455.79 | 3360.88 | 94.91 | 27464.80 | 8.E-05 |
| Q09666 | FGVSTGREGQTPK                                             | 1365.69 | 1362.69 | 3.00  | 2196.87  | 8.E-05 |
| Q8NC51 | NPLPPSVGVVDKKEETQPPVALKK                                  | 2585.35 | 2569.45 | 15.90 | 6151.21  | 8.E-05 |
| Q16695 | KPHRYRPGTVALREIRRYQK                                      | 2523.44 | 2523.44 | 0.00  | -1.65    | 8.E-05 |
| P05386 | (49)MASVSELACIYSALILHDDEVTVTEDKINALIK                     | 3648.79 | 3645.85 | 2.94  | 804.89   | 8.E-05 |
| P60709 | DLYANTVLSGGTTMYPGIADRMQK                                  | 2601.25 | 2601.26 | -0.01 | -2.19    | 8.E-05 |
| Q16695 | VARKSAPATGGVKKPHRYRPGTVALREIRRYQK                         | 3746.15 | 3746.16 | -0.01 | -1.93    | 8.E-05 |
| Q6FI13 | GNYAERVGAGAPVYMAAVLEYLTAEILELAGNAARDNKK                   | 4108.10 | 4108.11 | -0.01 | -2.09    | 8.E-05 |
| Q15149 | ANEALRLRLQAE EVAQK                                        | 2064.09 | 2066.12 | -2.03 | -985.87  | 9.E-05 |
| Q15149 | ANEALRLRLQAE EVAQK                                        | 2066.12 | 2066.12 | 0.00  | 1.59     | 9.E-05 |
| Q15149 | QRALQALEELRLQAE EAERRLRQAE VERARQVQVALETAQR<br>SAE AELQSK | 5784.07 | 5784.09 | -0.02 | -3.58    | 9.E-05 |
| Q09666 | FGVSTGREGQTPK                                             | 1362.69 | 1362.69 | 0.00  | 1.21     | 9.E-05 |

|        |                     |         |         |       |          |        |
|--------|---------------------|---------|---------|-------|----------|--------|
| Q09666 | FGVSTGREGQTPK       | 1362.73 | 1362.69 | 0.04  | 31.15    | 9.E-05 |
| Q9UKM9 | SNIDALLSRLEQIAAEQK  | 1998.07 | 1998.07 | 0.00  | -2.27    | 9.E-05 |
| P0C0S8 | VTIAQGGVLPNIQAVLLPK | 1973.16 | 1930.16 | 43.00 | 21793.30 | 1.E-04 |
