# Supplementary material
Source: PubMed Central journal article supplement (PMC2753674)
Supplement: NIHMS134733-supplement-SI2.pdf [file NIHMS134733-supplement-SI2.pdf]

| Accession Number | Sequence                             | Observed Mass (Da) | Theoretical Mass (Da) | Mass Diff (Da) | Mass Diff (ppm) | Expectation Value |
|------------------|--------------------------------------|--------------------|-----------------------|----------------|-----------------|-------------------|
| P60709           | IWHHTFYNELRVAPEEHPVLLTEAPLNPK        | 3449.81            | 3449.79               | 0.02           | 4.38            | 2.E-78            |
| Q9H0A0           | VLETPQEIHVSSEAVSLLEEVIPTPK           | 3003.62            | 3003.61               | 0.01           | 4.40            | 5.E-72            |
| Q15393           | FVIHPESNNLIIE TDHNAYTEATK            | 2868.43            | 2868.43               | 0.00           | 1.20            | 6.E-71            |
| O43395           | TPSSSQPERLPIGNTIQPSQAATFMNDAIEK      | 3327.65            | 3327.64               | 0.01           | 1.75            | 2.E-68            |
| Q9H0A0           | VLETPQEIHVSSEAVSLLEEVIPTPK           | 3004.56            | 3003.61               | 0.95           | 314.80          | 7.E-68            |
| Q9H0A0           | VLETPQEIHVSSEAVSLLEEVIPTPK           | 3003.62            | 3003.61               | 0.01           | 4.70            | 7.E-68            |
| P60709           | IWHHTFYNELRVAPEEHPVLLTEAPLNPK        | 3449.81            | 3449.79               | 0.02           | 4.76            | 1.E-67            |
| P61978           | IDEPLGSEDRIITITGTQDQIQNAQYLLQNSVK    | 3828.95            | 3828.94               | 0.01           | 2.61            | 2.E-66            |
| Q53HU8           | LLEGEESRISLPLPNFSSLNLRETNLDLPLVDTHSK | 4133.16            | 4133.16               | 0.00           | 0.73            | 4.E-65            |
| P60709           | IWHHTFYNELRVAPEEHPVLLTEAPLNPK        | 3449.79            | 3449.79               | 0.00           | 0.62            | 2.E-64            |
| Q03252           | DLESLFHRSEVELAAALSDK                 | 2229.13            | 2229.13               | 0.00           | -1.02           | 4.E-62            |
| P60709           | IWHHTFYNELRVAPEEHPVLLTEAPLNPK        | 3449.79            | 3449.79               | 0.00           | 0.33            | 4.E-61            |
| P60709           | IWHHTFYNELRVAPEEHPVLLTEAPLNPK        | 3449.74            | 3449.79               | -0.05          | -14.92          | 4.E-61            |
| Q03252           | DLESLFHRSEVELAAALSDK                 | 2229.13            | 2229.13               | 0.00           | -0.21           | 7.E-61            |

|        |                                 |         |         |       |         |        |
|--------|---------------------------------|---------|---------|-------|---------|--------|
| Q5VU20 | DELTDLQSNVTEETPEGEEHHPVADTENK   | 3377.48 | 3377.47 | 0.01  | 3.18    | 1.E-59 |
| P05783 | VIDDTNITRLQLETEIEALK            | 2313.25 | 2313.24 | 0.01  | 2.93    | 2.E-57 |
| P60709 | IWHHTFYNELRVAPEEHPVLLTEAPLNPK   | 3449.80 | 3449.79 | 0.01  | 2.99    | 2.E-56 |
| P09651 | GGNFGGRSSGPYGGGGQYFAK           | 2019.93 | 2019.92 | 0.01  | 2.82    | 3.E-56 |
| P06748 | VDNDENEHQLSLRTVSLGAGAK          | 2357.15 | 2352.17 | 4.98  | 2111.49 | 6.E-56 |
| P06748 | VDNDENEHQLSLRTVSLGAGAK          | 2352.17 | 2352.17 | 0.00  | -0.48   | 6.E-56 |
| P06748 | VDNDENEHQLSLRTVSLGAGAK          | 2352.13 | 2352.17 | -0.04 | -15.57  | 6.E-56 |
| O43395 | TPSSSQPERLPIGNTIQPSQAATFMNDAIEK | 3327.64 | 3327.64 | 0.00  | -0.18   | 1.E-55 |
| Q12905 | RNQDLAPNSAEQASILSLVTK           | 2254.19 | 2254.19 | 0.00  | 1.55    | 2.E-55 |
| Q12905 | RNQDLAPNSAEQASILSLVTK           | 2254.16 | 2254.19 | -0.03 | -14.15  | 2.E-55 |
| P08107 | DAGVIAGLNVLRRIINEPTAAAIYGLDRTGK | 3151.74 | 3151.74 | 0.00  | 0.11    | 3.E-55 |
| Q8WWI1 | EVAATEEDVTRLPSPTSPFSSLSQDQAATSK | 3248.58 | 3248.57 | 0.01  | 2.49    | 5.E-55 |
| P61978 | GSDFDCELRLLIHQSLAGGIIGVK        | 2597.36 | 2597.36 | 0.00  | 1.54    | 1.E-54 |
| Q7L4M3 | GQRASLEAAIADAEQRGELAIK          | 2296.22 | 2296.21 | 0.01  | 2.32    | 1.E-54 |
| O60506 | LDEIYVAGLVAHSDLDERAIEALK        | 2639.38 | 2639.38 | 0.00  | -1.47   | 1.E-54 |

|        |                                      |         |         |      |         |        |
|--------|--------------------------------------|---------|---------|------|---------|--------|
| P06748 | VDNDENEHQLSLRTVSLGAGAK               | 2353.13 | 2352.17 | 0.96 | 408.64  | 3.E-54 |
| P06748 | VDNDENEHQLSLRTVSLGAGAK               | 2352.17 | 2352.17 | 0.00 | -0.35   | 3.E-54 |
| Q14978 | (41)ADAGIRRVVPSDLYPLVLGFLRDNQLSEVANK | 3566.93 | 3566.92 | 0.01 | 1.80    | 6.E-54 |
| P62241 | TRIIDVVYNASNELVRTK                   | 2204.19 | 2204.19 | 0.00 | 0.95    | 1.E-52 |
| Q9UKM9 | SNIDALLSRLEQIAAEQK                   | 1998.07 | 1998.07 | 0.00 | -0.12   | 3.E-52 |
| O60506 | LDEIYVAGLVAHSDLDERAIEALK             | 2639.38 | 2639.38 | 0.00 | -0.60   | 4.E-52 |
| P09651 | GGNFGGRSSGPYGGGGQYFAK                | 2019.93 | 2019.92 | 0.01 | 2.53    | 5.E-52 |
| P05783 | YETELAMRQSVENDIHGLRK                 | 2388.19 | 2388.19 | 0.00 | 1.98    | 7.E-52 |
| P06748 | VDNDENEHQLSLRTVSLGAGAK               | 2357.15 | 2352.17 | 4.98 | 2112.42 | 1.E-51 |
| P06748 | VDNDENEHQLSLRTVSLGAGAK               | 2353.13 | 2352.17 | 0.96 | 409.15  | 1.E-51 |
| P06748 | VDNDENEHQLSLRTVSLGAGAK               | 2352.17 | 2352.17 | 0.00 | -1.20   | 1.E-51 |
| O95926 | (41)AAIAASEVLVDSAEEGSLAAAAELAAQK     | 2697.37 | 2697.37 | 0.00 | 1.29    | 1.E-51 |
| O75367 | NGPLEVAGAAVSAGHGLPAK                 | 1814.96 | 1814.96 | 0.00 | -0.46   | 4.E-51 |
| O60506 | LDEIYVAGLVAHSDLDERAIEALK             | 2639.38 | 2639.38 | 0.00 | -0.60   | 1.E-50 |
| O60506 | LDEIYVAGLVAHSDLDERAIEALK             | 2642.42 | 2639.38 | 3.04 | 1152.21 | 3.E-50 |

|        |                                    |         |         |       |          |        |
|--------|------------------------------------|---------|---------|-------|----------|--------|
| P61978 | GSDFDCELRLLIHQSLAGGIIGVK           | 2597.37 | 2597.36 | 0.01  | 2.04     | 8.E-50 |
| Q7L4M3 | GQRASLEAAIADAEQRGELAIK             | 2296.21 | 2296.21 | 0.00  | 1.67     | 8.E-50 |
| Q7L4M3 | GQRASLEAAIADAEQRGELAIK             | 2296.18 | 2296.21 | -0.03 | -13.75   | 8.E-50 |
| O75367 | GRVTPRHILLAVANDEELNQLLK            | 2598.46 | 2598.46 | 0.00  | 0.19     | 2.E-49 |
| O75367 | GRVTPRHILLAVANDEELNQLLK            | 2598.41 | 2598.46 | -0.05 | -18.09   | 2.E-49 |
| Q5VU20 | DELTDLDQSNVTEETPEGEEHHPVADTENK     | 3377.48 | 3377.47 | 0.01  | 3.89     | 4.E-49 |
| P09651 | GGNFGGRSSGPYGGGGQYFAK              | 2019.92 | 2019.92 | 0.00  | 0.50     | 4.E-49 |
| Q32Q82 | PSSSPVIFAGGQAYTIQQQYAIPQPDLTk      | 3034.54 | 3033.54 | 1.00  | 331.02   | 4.E-49 |
| O60506 | LDEIYVAGLVAHSDLDERAIEALK           | 2639.38 | 2639.38 | 0.00  | -1.77    | 1.E-48 |
| Q7L4M3 | GQRASLEAAIADAEQRGELAIK             | 2296.21 | 2296.21 | 0.00  | 1.41     | 3.E-48 |
| P61978 | GSDFDCELRLLIHQSLAGGIIGVK           | 2597.36 | 2597.36 | 0.00  | -1.58    | 4.E-48 |
| P61978 | GSDFDCELRLLIHQSLAGGIIGVK           | 2590.33 | 2597.36 | -7.03 | -2712.08 | 4.E-48 |
| P07355 | GLGTDEDSLIEIICSRTNQELQEINRVYK      | 3400.78 | 3392.69 | 8.09  | 2378.59  | 5.E-48 |
| P07355 | GLGTDEDSLIEIICSRTNQELQEINRVYK      | 3393.70 | 3392.69 | 1.01  | 296.89   | 5.E-48 |
| P61978 | IDEPLEGSEDRIITITGTQDQIQNAQYLLQNSVK | 3828.95 | 3828.94 | 0.01  | 2.38     | 7.E-48 |

|        |                                      |         |         |       |        |        |
|--------|--------------------------------------|---------|---------|-------|--------|--------|
| Q15029 | ILAQVVGDVDTSLPRTLDELGIHLTK           | 2802.56 | 2802.55 | 0.01  | 2.34   | 7.E-48 |
| Q14254 | VTSEVNRLLAELPASVHALTGVDLSK           | 2718.49 | 2718.49 | 0.00  | 0.58   | 2.E-47 |
| P11142 | DAGTIAGLNVLRIINEPTAAAIYGLDK          | 2839.53 | 2839.54 | -0.01 | -2.11  | 2.E-47 |
| P11142 | DAGTIAGLNVLRIINEPTAAAIYGLDK          | 2839.48 | 2839.54 | -0.06 | -20.70 | 2.E-47 |
| P05783 | YETELAMRQSVENDIHGLRK                 | 2388.20 | 2388.19 | 0.01  | 2.28   | 2.E-47 |
| O75367 | NGPLEVAGAAVSAGHGLPAK                 | 1814.96 | 1814.96 | 0.00  | 0.26   | 3.E-47 |
| Q92499 | GHVDILAPTVQELAALEK                   | 1903.04 | 1903.04 | 0.00  | -1.43  | 8.E-47 |
| P26599 | NNQFQALLQYADPVSAQHAK                 | 2242.12 | 2242.11 | 0.01  | 2.65   | 8.E-47 |
| P60709 | IWHHTFYNELRVAPEEHPVLLTEAPLNPK        | 3449.80 | 3449.79 | 0.01  | 2.93   | 9.E-47 |
| P52272 | (41)AAGVEAAAEVAATEIK                 | 1541.79 | 1541.79 | 0.00  | -0.12  | 5.E-46 |
| P52272 | (41)AAGVEAAAEVAATEIK                 | 1541.76 | 1541.79 | -0.03 | -16.53 | 5.E-46 |
| Q7L4M3 | GQRASLEAAIADAEQRGELAIAK              | 2296.21 | 2296.21 | 0.00  | 1.37   | 7.E-46 |
| O75367 | NGPLEVAGAAVSAGHGLPAK                 | 1814.96 | 1814.96 | 0.00  | 0.20   | 7.E-46 |
| Q53HU8 | LLEGEESRISLPLPNFSSLNLRETNLDLPLVDTHSK | 4133.17 | 4133.16 | 0.01  | 3.20   | 9.E-46 |
| P08758 | VLTEIIASRTPEELRAIK                   | 2038.18 | 2038.18 | 0.00  | 0.49   | 2.E-45 |

|        |                                    |         |         |       |          |        |
|--------|------------------------------------|---------|---------|-------|----------|--------|
| P08758 | VLTEIIASRTPEELRAIK                 | 2038.15 | 2038.18 | -0.03 | -13.69   | 2.E-45 |
| O00571 | PLPPSERLEQELFSGGNTGINFEK           | 2658.33 | 2658.33 | 0.00  | -0.75    | 2.E-45 |
| P07355 | GRRRAEDGSVIDYELIDQDARDLYDAGVK      | 3138.52 | 3138.52 | 0.00  | 1.08     | 2.E-45 |
| P07355 | GRRRAEDGSVIDYELIDQDARDLYDAGVK      | 3134.62 | 3138.52 | -3.90 | -1243.73 | 2.E-45 |
| Q9UQE7 | LEGIITRVETYLNENLRK                 | 2160.19 | 2160.19 | 0.00  | 1.74     | 4.E-45 |
| Q9UQE7 | LEGIITRVETYLNENLRK                 | 2160.16 | 2160.19 | -0.03 | -15.43   | 4.E-45 |
| P08758 | (41)AQLVLRGTVTDFPGFDERADAETLRK     | 2833.44 | 2833.44 | 0.00  | 1.25     | 5.E-45 |
| O43390 | VLFVRNLATTVTEEILEK                 | 2074.17 | 2074.17 | 0.00  | 0.69     | 9.E-45 |
| P08758 | VLTEIIASRTPEELRAIK                 | 2038.18 | 2038.18 | 0.00  | 1.28     | 1.E-44 |
| O43390 | VLFVRNLATTVTEEILEK                 | 2070.21 | 2074.17 | -3.96 | -1912.69 | 1.E-44 |
| P05783 | YETELAMRQSVENDIHGLRK               | 2388.20 | 2388.19 | 0.01  | 2.57     | 1.E-44 |
| Q13885 | GHYTEGAELVDSVLDVVRK                | 2086.07 | 2086.07 | 0.00  | 1.23     | 2.E-44 |
| Q13283 | LPNFGFVVFDDSEPVQK                  | 1936.97 | 1936.96 | 0.01  | 2.98     | 3.E-44 |
| P51991 | RGFAFVTFDDHDTVDK                   | 1868.87 | 1868.87 | 0.00  | 0.06     | 3.E-44 |
| Q53HU8 | LLEGEESRISLPLPNFSSLNLRNLDLPLVDTHSK | 4133.17 | 4133.16 | 0.01  | 3.39     | 4.E-44 |

|        |                                |         |         |      |         |        |
|--------|--------------------------------|---------|---------|------|---------|--------|
| P07355 | GLGTDEDSLIEIICSRTNQELQEINRVYK  | 3399.78 | 3392.69 | 7.09 | 2086.06 | 4.E-44 |
| P07355 | GLGTDEDSLIEIICSRTNQELQEINRVYK  | 3392.69 | 3392.69 | 0.00 | 0.66    | 4.E-44 |
| P51991 | GGSFGRSSGSPYGGGYGSGGGSGGYGSRRF | 2831.24 | 2831.24 | 0.00 | 0.26    | 4.E-44 |
| Q7L4M3 | GQRASLEAAIADAEQRGELAİK         | 2296.21 | 2296.21 | 0.00 | -0.55   | 5.E-44 |
| P06748 | VDNDENEHQSLRRTVSLGAGAK         | 2352.17 | 2352.17 | 0.00 | 0.41    | 5.E-44 |
| Q16576 | IGEEQSAEDAEDGPELLFIHGHTAK      | 2846.35 | 2846.34 | 0.01 | 3.02    | 7.E-44 |
| Q8IY81 | HRILDPEGLALGAVIASSK            | 1946.09 | 1946.09 | 0.00 | 0.85    | 7.E-44 |
| Q15393 | FVIHPESNNLIIETDHNAYTEATK       | 2868.43 | 2868.43 | 0.00 | 1.34    | 9.E-44 |
| P05783 | VIDDTNITRLQLETEIEALK           | 2313.25 | 2313.24 | 0.01 | 3.45    | 9.E-44 |
| P67809 | GAEAAVNTGPGGVPVQGSK            | 1694.86 | 1694.86 | 0.00 | 2.82    | 9.E-44 |
| Q86V81 | LLVSNLDFGVSDADIQELFAEFGTLK     | 2840.45 | 2840.45 | 0.00 | -1.14   | 1.E-43 |
| P32969 | DELILEGNDIELVSNAAIQQATTVK      | 2883.51 | 2883.51 | 0.00 | 0.61    | 1.E-43 |
| Q9H0S4 | IQIEAIPALQGRDIIGLAETGSGK       | 2565.17 | 2562.44 | 2.73 | 1063.74 | 1.E-43 |
| Q9H0S4 | IQIEAIPALQGRDIIGLAETGSGK       | 2562.45 | 2562.44 | 0.01 | 2.21    | 1.E-43 |
| Q7L4M3 | GQRASLEAAIADAEQRGELAİK         | 2296.21 | 2296.21 | 0.00 | 1.93    | 1.E-43 |

|        |                                |         |         |       |        |        |
|--------|--------------------------------|---------|---------|-------|--------|--------|
| Q3BDU5 | LVRSVTVVEDDEDEDGDDLLHHHHVSGSRR | 3422.62 | 3422.62 | 0.00  | -0.22  | 2.E-43 |
| P06748 | VDNDENEHQLSLRTVSLGAGAK         | 2352.17 | 2352.17 | 0.00  | -0.01  | 2.E-43 |
| P06748 | VDNDENEHQLSLRTVSLGAGAK         | 2352.11 | 2352.17 | -0.06 | -26.28 | 2.E-43 |
| P07355 | GRRRAEDGSVIDYELIDQDARDLYDAGVK  | 3138.52 | 3138.52 | 0.00  | 1.14   | 2.E-43 |
| Q9NWH9 | (41)AAATGAVAASAASGQAEGK        | 1629.80 | 1629.80 | 0.00  | 2.32   | 2.E-43 |
| Q9NWH9 | (41)AAATGAVAASAASGQAEGK        | 1629.78 | 1629.80 | -0.02 | -15.10 | 2.E-43 |
| Q15427 | (41)AAGPISERNQDATVYVGGGLDEK    | 2331.14 | 2331.13 | 0.01  | 3.84   | 3.E-43 |
| Q13283 | LPNFGFVVFDDSEPVQK              | 1936.97 | 1936.96 | 0.01  | 2.77   | 4.E-43 |
| P52272 | (41)AAGVEAAAEVAATEIK           | 1541.79 | 1541.79 | 0.00  | -0.18  | 7.E-43 |
| P52272 | (41)AAGVEAAAEVAATEIK           | 1541.77 | 1541.79 | -0.02 | -14.32 | 7.E-43 |
| P08758 | VLTEIIASRTPEELRAIK             | 2038.18 | 2038.18 | 0.00  | 0.79   | 9.E-43 |
| Q9Y265 | IRAQTEGINISEEALNHLGEIGTK       | 2592.36 | 2592.35 | 0.01  | 2.70   | 1.E-42 |
| P05783 | VIDDTNITRLQLETEIEALK           | 2313.25 | 2313.24 | 0.01  | 2.72   | 1.E-42 |
| P06748 | VDNDENEHQLSLRTVSLGAGAK         | 2352.17 | 2352.17 | 0.00  | 0.03   | 1.E-42 |
| P67809 | GAEAAVNTGPGGVPVQGSK            | 1694.86 | 1694.86 | 0.00  | 2.71   | 2.E-42 |



|        |                                |         |         |       |         |        |
|--------|--------------------------------|---------|---------|-------|---------|--------|
| P09651 | GGNFGGRSSGPYGGGGQYFAK          | 2019.92 | 2019.92 | 0.00  | 0.30    | 2.E-42 |
| P09651 | GGNFGGRSSGPYGGGGQYFAK          | 2019.89 | 2019.92 | -0.03 | -14.90  | 2.E-42 |
| P08758 | (41)AQVLRGTVTDFPGFDERADAETLRK  | 2834.40 | 2833.44 | 0.96  | 338.58  | 2.E-42 |
| P08758 | (41)AQVLRGTVTDFPGFDERADAETLRK  | 2833.44 | 2833.44 | 0.00  | 0.05    | 2.E-42 |
| Q7L4M3 | GQRASLEAAIADAEQRGELAIAK        | 2296.21 | 2296.21 | 0.00  | 0.93    | 2.E-42 |
| P08758 | VLTEIIASRTPEELRAIK             | 2038.18 | 2038.18 | 0.00  | 0.49    | 3.E-42 |
| Q71U36 | TIGGGDDSFNTFFSETGAGK           | 2006.90 | 2006.89 | 0.01  | 2.88    | 3.E-42 |
| P05783 | VIDDTNITRLQLETEIEALK           | 2313.25 | 2313.24 | 0.01  | 2.50    | 3.E-42 |
| Q12905 | RNQDLAPNSAEQASILSLVTK          | 2254.19 | 2254.19 | 0.00  | 2.18    | 3.E-42 |
| Q12905 | RNQDLAPNSAEQASILSLVTK          | 2253.16 | 2254.19 | -1.03 | -455.00 | 3.E-42 |
| Q92841 | APILIATDVASRGLDVEDVK           | 2081.14 | 2081.14 | 0.00  | 0.35    | 3.E-42 |
| P08107 | DAGVIAGLNVLRIINEPTAAAIYGLDRTGK | 3153.74 | 3151.74 | 2.00  | 635.04  | 4.E-42 |
| Q9Y4Y9 | (41)AANATTNPSQLLPLELVDK        | 2036.08 | 2036.08 | 0.00  | 1.14    | 5.E-42 |
| P08758 | VLTEIIASRTPEELRAIK             | 2038.15 | 2038.18 | -0.03 | -13.74  | 5.E-42 |
| Q71U36 | TIGGGDDSFNTFFSETGAGK           | 2006.90 | 2006.89 | 0.01  | 3.53    | 5.E-42 |

|        |                                |         |         |       |         |        |
|--------|--------------------------------|---------|---------|-------|---------|--------|
| A6NI71 | ALPLIVGAQLIHADK                | 1557.92 | 1557.92 | 0.00  | -1.36   | 5.E-42 |
| P08758 | (41)AQVLRGTVTDFPGFDERADAETLRK  | 2833.44 | 2833.44 | 0.00  | 0.62    | 6.E-42 |
| P08758 | (41)AQVLRGTVTDFPGFDERADAETLRK  | 2833.40 | 2833.44 | -0.04 | -14.70  | 6.E-42 |
| P08758 | VLTEIIASRTPEELRAIK             | 2038.18 | 2038.18 | 0.00  | 0.54    | 6.E-42 |
| Q12905 | RNQDLAPNSAEQASILSLVTK          | 2254.20 | 2254.19 | 0.01  | 3.42    | 9.E-42 |
| P67809 | GAEAANVTGPGGVPVQGSK            | 1694.86 | 1694.86 | 0.00  | 2.88    | 1.E-41 |
| P35659 | SICEVLDLERSGVNSELVK            | 2146.10 | 2146.09 | 0.01  | 2.91    | 1.E-41 |
| Q15029 | ILAQVVGVDVDTSLPRTLDELGIHLTK    | 2802.55 | 2802.55 | 0.00  | -1.41   | 1.E-41 |
| Q7L4M3 | GQRASLEAAIADAEQRGELAIK         | 2296.21 | 2296.21 | 0.00  | -0.16   | 1.E-41 |
| P34931 | VEIANDQGNRTTPSYVAFTDTERLIGDAAK | 3364.69 | 3364.69 | 0.00  | 0.10    | 2.E-41 |
| Q9H0S4 | IQIEAIPALQGRDIIGLAETGSGK       | 2565.17 | 2562.44 | 2.73  | 1063.08 | 2.E-41 |
| Q08211 | AENNSEVGASGYGVPGPTWDRGANLK     | 2645.25 | 2645.25 | 0.00  | 1.23    | 3.E-41 |
| P46782 | WSTDDVQINDISLQDYIAVK           | 2322.14 | 2322.14 | 0.00  | 1.88    | 3.E-41 |
| P36578 | APIRPDIVNFVHTNLRK              | 1989.13 | 1989.13 | 0.00  | 2.07    | 3.E-41 |
| P11142 | SINPDEAVAYGAAVQAAILSGDK        | 2259.14 | 2259.14 | 0.00  | -0.68   | 3.E-41 |

|        |                                  |         |         |       |         |        |
|--------|----------------------------------|---------|---------|-------|---------|--------|
| Q9H0S4 | IQIEAIPALQGRDIIGLAETGSGK         | 2562.44 | 2562.44 | 0.00  | 1.74    | 4.E-41 |
| P07355 | GLGTDEDSLIEIICSRTNQELQEINRVYK    | 3392.70 | 3392.69 | 0.01  | 1.81    | 5.E-41 |
| P06748 | VDNDENEHQLSLRTVSLGAGAK           | 2352.17 | 2352.17 | 0.00  | 0.33    | 5.E-41 |
| P06748 | VDNDENEHQLSLRTVSLGAGAK           | 2352.11 | 2352.17 | -0.06 | -23.99  | 5.E-41 |
| P08758 | (41)AQVLRGTVTDFPGFDERADAETLRK    | 2833.44 | 2833.44 | 0.00  | 1.22    | 5.E-41 |
| P60709 | YPIE(317)HGIVTNWDDMEK            | 1959.87 | 1959.90 | -0.03 | -16.58  | 1.E-40 |
| P67809 | GAEAANVTGPGGVPVQGSK              | 1694.87 | 1694.86 | 0.01  | 3.24    | 1.E-40 |
| O60506 | ALLERTGYTLDVTTGQRK               | 2021.09 | 2021.09 | 0.00  | -0.31   | 1.E-40 |
| P60709 | YPIE(317)HGIVTNWDDMEK            | 1959.91 | 1959.90 | 0.01  | 2.97    | 1.E-40 |
| P34931 | VEIANDQGNRTTPSYVAFTDTERLIGDAAK   | 3364.70 | 3364.69 | 0.01  | 1.89    | 1.E-40 |
| Q13885 | GHYTEGAELVDSVLDVVRK              | 2086.07 | 2086.07 | 0.00  | 0.51    | 1.E-40 |
| P05783 | GLQAQIASSGLTVEVDAPK              | 1885.01 | 1883.00 | 2.01  | 1067.49 | 1.E-40 |
| Q9Y265 | IRAQTEGINISEEALNHLGEIGTK         | 2592.36 | 2592.35 | 0.01  | 2.59    | 2.E-40 |
| Q9UQE7 | RLDQVEQELNELRETEGGTVLTATTSELEINK | 3685.87 | 3685.86 | 0.01  | 1.41    | 2.E-40 |
| P08758 | VLTEIIASRTPEELRAIK               | 2038.18 | 2038.18 | 0.00  | -0.19   | 2.E-40 |

|        |                               |         |         |       |         |        |
|--------|-------------------------------|---------|---------|-------|---------|--------|
| P02533 | TEELNREVATNSELVQSGK           | 2103.04 | 2103.04 | 0.00  | 1.82    | 2.E-40 |
| P02533 | TEELNREVATNSELVQSGK           | 2102.99 | 2103.04 | -0.05 | -21.43  | 2.E-40 |
| P60709 | YPIE(317)HGIVTNWDDMEK         | 1958.05 | 1959.90 | -1.85 | -945.32 | 2.E-40 |
| P08758 | (41)AQVLRGTVTDFPGFDERADAETLRK | 2833.44 | 2833.44 | 0.00  | 0.16    | 2.E-40 |
| P08758 | (41)AQVLRGTVTDFPGFDERADAETLRK | 2833.38 | 2833.44 | -0.06 | -19.43  | 2.E-40 |
| P07355 | AYTNFDAERDALNIETAIK           | 2154.06 | 2154.06 | 0.00  | -0.55   | 3.E-40 |
| P07355 | GLGTDEDSLIEIICSRTNQELQEINRVYK | 3392.69 | 3392.69 | 0.00  | 0.60    | 3.E-40 |
| P08670 | TVETRDGQVINETSQHHDDLE         | 2422.11 | 2422.10 | 0.01  | 3.49    | 3.E-40 |
| P67809 | GAEAAANVTGPGGVPVQGSK          | 1694.87 | 1694.86 | 0.01  | 3.30    | 3.E-40 |
| P60709 | YPIE(317)HGIVTNWDDMEK         | 1959.91 | 1959.90 | 0.01  | 3.83    | 4.E-40 |
| P08758 | (41)AQVLRGTVTDFPGFDERADAETLRK | 2833.44 | 2833.44 | 0.00  | 1.47    | 4.E-40 |
| Q5BKZ1 | RESVLTATSILNNPIVK             | 1854.06 | 1854.06 | 0.00  | -0.72   | 4.E-40 |
| Q9NSI2 | GEAAPGPAPPAPEATPPPASAAGK      | 2108.05 | 2108.05 | 0.00  | 1.21    | 4.E-40 |
| P60709 | YPIE(317)HGIVTNWDDMEK         | 1959.88 | 1959.90 | -0.02 | -12.24  | 4.E-40 |
| P08758 | VLTEIIASRTPEELRAIK            | 2038.18 | 2038.18 | 0.00  | 1.18    | 4.E-40 |

|        |                            |         |         |       |         |        |
|--------|----------------------------|---------|---------|-------|---------|--------|
| Q14683 | PAPFFVLDEIDAALDNTNIGK      | 2259.14 | 2259.14 | 0.00  | -0.07   | 5.E-40 |
| O00571 | SPILVATAVAARGLDISNVK       | 1994.15 | 1994.15 | 0.00  | -0.24   | 5.E-40 |
| P60709 | YPIE(317)HGIVTNWDDMEK      | 1959.90 | 1959.90 | 0.00  | 1.59    | 5.E-40 |
| P11142 | SQIHDIIVLVGGSTRIPK         | 1819.03 | 1819.03 | 0.00  | 0.14    | 6.E-40 |
| O75367 | AASADSTTEGTPADGFTVLSTK     | 2126.00 | 2126.00 | 0.00  | 0.52    | 8.E-40 |
| O60506 | LDEIYVAGLVAHSDLDERAIEALK   | 2641.42 | 2639.38 | 2.04  | 774.14  | 8.E-40 |
| P23396 | KPLPDHVSIVEPKDEILPTTPISEQK | 2909.57 | 2909.57 | 0.00  | 0.61    | 8.E-40 |
| P08758 | VLTEIIASRTPEELRAIK         | 2038.15 | 2038.18 | -0.03 | -14.13  | 1.E-39 |
| O60506 | ALLERTGYTLDVTTGQRK         | 2025.08 | 2021.09 | 3.99  | 1968.26 | 1.E-39 |
| O60506 | ALLERTGYTLDVTTGQRK         | 2021.09 | 2021.09 | 0.00  | 0.53    | 1.E-39 |
| Q8TDN6 | TLLPHDPTADVFTPAEEK         | 2079.06 | 2079.05 | 0.01  | 2.89    | 1.E-39 |
| Q15393 | TPVEEVPAAIAPFQGRVLIGVGK    | 2347.33 | 2347.33 | 0.00  | 1.45    | 1.E-39 |
| P23396 | KPLPDHVSIVEPKDEILPTTPISEQK | 2914.42 | 2909.57 | 4.85  | 1663.55 | 1.E-39 |
| P08758 | VLTEIIASRTPEELRAIK         | 2038.18 | 2038.18 | 0.00  | 0.64    | 1.E-39 |
| P0C0S8 | VTIAQGGVLPNIQAVLLPK        | 1930.16 | 1930.16 | 0.00  | 0.32    | 2.E-39 |

|        |                            |         |         |       |         |        |
|--------|----------------------------|---------|---------|-------|---------|--------|
| P08670 | TVETRDGQVINETSQHHDDLE      | 2422.11 | 2422.10 | 0.01  | 3.53    | 2.E-39 |
| P16403 | (51)SETAPAAPAAAPPAEK       | 1519.75 | 1519.75 | 0.00  | -1.00   | 2.E-39 |
| P16403 | (51)SETAPAAPAAAPPAEK       | 1519.73 | 1519.75 | -0.02 | -16.07  | 2.E-39 |
| P11142 | SQIHDIVLVGGSTRIPK          | 1819.03 | 1819.03 | 0.00  | -0.08   | 3.E-39 |
| P05783 | YETELAMRQSVENDIHGLRK       | 2388.20 | 2388.19 | 0.01  | 2.95    | 3.E-39 |
| Q92841 | APILIATDVASRGLDVEDVK       | 2081.14 | 2081.14 | 0.00  | -0.28   | 4.E-39 |
| P67809 | GAEAANVTGPGGVPVQGSK        | 1694.87 | 1694.86 | 0.01  | 3.41    | 4.E-39 |
| Q9Y3C1 | PYVLNDLEAEASLPEK           | 1786.90 | 1786.90 | 0.00  | 1.31    | 4.E-39 |
| P26368 | LFIGGLPNYLNDQVK            | 1804.95 | 1804.94 | 0.01  | 3.04    | 5.E-39 |
| Q8WWI1 | RTPNNVSTPAPSPDASQLASSLSSQK | 2738.38 | 2738.38 | 0.00  | 1.76    | 5.E-39 |
| Q14683 | PAPFFVLDEIDAALDNTNIGK      | 2259.14 | 2259.14 | 0.00  | 0.51    | 5.E-39 |
| Q14683 | PAPFFVLDEIDAALDNTNIGK      | 2259.10 | 2259.14 | -0.04 | -15.74  | 5.E-39 |
| P83916 | KVEEVLEEEEEYYVEK           | 2108.00 | 2108.00 | 0.00  | 1.60    | 5.E-39 |
| P08758 | VLTEIIASRTPEELRAIK         | 2038.18 | 2038.18 | 0.00  | 0.30    | 6.E-39 |
| P19338 | VEGTEPTTAFNLFVGNLNFNK      | 2315.13 | 2311.15 | 3.98  | 1720.97 | 6.E-39 |

|        |                                |         |         |       |          |        |
|--------|--------------------------------|---------|---------|-------|----------|--------|
| P19338 | VEGTEPTTAFNLFVGNLNFNK          | 2311.15 | 2311.15 | 0.00  | -0.70    | 6.E-39 |
| Q86V81 | LLVSNLDFGVSDADIQELFAEFGTLK     | 2840.45 | 2840.45 | 0.00  | -0.64    | 7.E-39 |
| P34931 | VEIANDQGNRTTPSYVAFTDTERLIGDAAK | 3364.69 | 3364.69 | 0.00  | 0.37     | 8.E-39 |
| P61978 | GSDFDCELRLLIHQSLAGGIIGVK       | 2597.36 | 2597.36 | 0.00  | -1.00    | 8.E-39 |
| P61978 | GSDFDCELRLLIHQSLAGGIIGVK       | 2590.33 | 2597.36 | -7.03 | -2712.62 | 8.E-39 |
| O75367 | AASADSTTEGTPADGFTVLSTK         | 2126.00 | 2126.00 | 0.00  | 0.57     | 8.E-39 |
| P19338 | VEGTEPTTAFNLFVGNLNFNK          | 2311.15 | 2311.15 | 0.00  | 0.29     | 8.E-39 |
| Q07020 | TAVVVGITDDVRVQEVPK             | 2025.11 | 2025.11 | 0.00  | 0.31     | 8.E-39 |
| P52597 | ITGEAFVQFASQELAEK              | 1866.95 | 1866.94 | 0.01  | 3.80     | 9.E-39 |
| P05783 | VIDDTNITRLQLETEIEALK           | 2313.25 | 2313.24 | 0.01  | 3.71     | 9.E-39 |
| Q71U36 | TIGGGDDSFNTFFSETGAGK           | 2013.87 | 2006.89 | 6.98  | 3464.28  | 1.E-38 |
| P11021 | ITITNDQNRLTPEEIERMVNDAEK       | 2828.40 | 2828.40 | 0.00  | 0.00     | 1.E-38 |
| P11021 | ITITNDQNRLTPEEIERMVNDAEK       | 2826.50 | 2828.40 | -1.90 | -673.13  | 1.E-38 |
| O60506 | VLFVRNLANTVTEEILEK             | 2087.16 | 2087.16 | 0.00  | -1.30    | 1.E-38 |
| P02545 | RTLEGELHDLRGQVAK               | 1820.99 | 1820.99 | 0.00  | 0.19     | 1.E-38 |

|        |                                 |         |         |       |         |        |
|--------|---------------------------------|---------|---------|-------|---------|--------|
| P62241 | TRIIDVVYNASNNELVRTK             | 2204.19 | 2204.19 | 0.00  | 0.32    | 1.E-38 |
| P34931 | VEIANDQGNRTTPSYVAFTDTERLIGDAAK  | 3364.69 | 3364.69 | 0.00  | -0.11   | 2.E-38 |
| Q71U36 | TIGGGDDSFNTFFSETGAGK            | 2006.90 | 2006.89 | 0.01  | 4.42    | 2.E-38 |
| O60506 | ALLERTGYTLDVTTGQRK              | 2025.08 | 2021.09 | 3.99  | 1968.31 | 2.E-38 |
| O60506 | ALLERTGYTLDVTTGQRK              | 2021.09 | 2021.09 | 0.00  | 0.48    | 2.E-38 |
| Q8WWI1 | EVAATEEDVTRLPSPTSPFSSLSQDQAATSK | 3248.58 | 3248.57 | 0.01  | 2.98    | 2.E-38 |
| P08758 | VLTEIIASRTPEELRAIK              | 2038.15 | 2038.18 | -0.03 | -14.08  | 2.E-38 |
| Q9Y3C1 | PYVLNDLEAEASLPEK                | 1786.90 | 1786.90 | 0.00  | 0.92    | 2.E-38 |
| P08758 | VLTEIIASRTPEELRAIK              | 2038.18 | 2038.18 | 0.00  | 0.59    | 3.E-38 |
| Q92499 | ALIVEPSRELAEQTLNNIK             | 2137.17 | 2137.17 | 0.00  | -0.44   | 3.E-38 |
| P07355 | AYTNFDAERDALNIETAIK             | 2154.07 | 2154.06 | 0.01  | 2.75    | 3.E-38 |
| P08758 | (41)AQLRGTVTDFPGFDERADAETLRK    | 2833.44 | 2833.44 | 0.00  | 1.33    | 3.E-38 |
| O60506 | LDEIYVAGLVAHSDLDERAIEALK        | 2641.42 | 2639.38 | 2.04  | 773.83  | 3.E-38 |
| P19388 | IIRPSETAGRYITYRLVQ              | 2135.19 | 2135.19 | 0.00  | 0.89    | 4.E-38 |
| P04083 | ALTGHLEEVVLALLK                 | 1604.95 | 1604.95 | 0.00  | 1.69    | 4.E-38 |



|        |                               |         |         |       |         |        |
|--------|-------------------------------|---------|---------|-------|---------|--------|
| P04083 | ALTGHLEEVVLALLK               | 1604.92 | 1604.95 | -0.03 | -16.07  | 4.E-38 |
| O60506 | ALLERTGYTLDVTTGQRK            | 2021.09 | 2021.09 | 0.00  | -0.31   | 5.E-38 |
| P67809 | GAEAANVTGPGGVPVQGSK           | 1694.86 | 1694.86 | 0.00  | 2.94    | 6.E-38 |
| Q9Y224 | NAEPLINLDVNNPDFK              | 1811.91 | 1811.91 | 0.00  | 0.97    | 6.E-38 |
| Q9Y224 | NAEPLINLDVNNPDFK              | 1811.88 | 1811.91 | -0.03 | -18.02  | 6.E-38 |
| P05783 | GLQAQIASSGLTVEVDAPK           | 1884.01 | 1883.00 | 1.01  | 536.59  | 6.E-38 |
| P52597 | ITGEAFVQFASQELA EK            | 1866.95 | 1866.94 | 0.01  | 2.78    | 7.E-38 |
| P11142 | SINPDEAVAYGAAVQAAILSGDK       | 2259.14 | 2259.14 | 0.00  | -0.72   | 7.E-38 |
| P02533 | TEELNREVATNSELVQSGK           | 2103.04 | 2103.04 | 0.00  | 1.78    | 8.E-38 |
| P02533 | TEELNREVATNSELVQSGK           | 2102.99 | 2103.04 | -0.05 | -21.43  | 8.E-38 |
| Q53F64 | IFVGGLNPEATEEK                | 1502.76 | 1502.76 | 0.00  | -0.82   | 8.E-38 |
| Q53F64 | IFVGGLNPEATEEK                | 1502.74 | 1502.76 | -0.02 | -16.53  | 8.E-38 |
| P46782 | WSTDDVQINDISLQDYIAVK          | 2322.14 | 2322.14 | 0.00  | 0.64    | 9.E-38 |
| Q07020 | TAVVVGITDDVRVQEVPK            | 2025.11 | 2025.11 | 0.00  | 1.20    | 1.E-37 |
| P07355 | GLGTDEDSLIEIICSRTNQELQEINRVYK | 3400.78 | 3392.69 | 8.09  | 2379.29 | 1.E-37 |

|        |                                |         |         |       |        |        |
|--------|--------------------------------|---------|---------|-------|--------|--------|
| P07355 | GLGTDEDSLIEIICSRTNQELQEINRVYK  | 3393.70 | 3392.69 | 1.01  | 296.65 | 1.E-37 |
| P60709 | IWHHTFYNELRVAPEEHPVLLTEAPLNPK  | 3449.80 | 3449.79 | 0.01  | 2.33   | 1.E-37 |
| O60506 | VLFVRNLANTVTEEILEK             | 2087.16 | 2087.16 | 0.00  | -2.07  | 1.E-37 |
| P34931 | VEIANDQGNRTTPSYVAFTDTERLIGDAAK | 3364.69 | 3364.69 | 0.00  | 0.70   | 1.E-37 |
| P07355 | AYTNFDAERDALNIETAIK            | 2154.06 | 2154.06 | 0.00  | 1.78   | 1.E-37 |
| P07355 | GLGTDEDSLIEIICSRTNQELQEINRVYK  | 3392.70 | 3392.69 | 0.01  | 1.78   | 2.E-37 |
| Q15427 | (41)AAGPISERNQDATVYVGGGLDEK    | 2331.14 | 2331.13 | 0.01  | 3.11   | 2.E-37 |
| P67809 | GAEAAVNTGPGGVPVQGSK            | 1694.86 | 1694.86 | 0.00  | 2.88   | 2.E-37 |
| P08758 | (41)AQVLRGTVTDFPGFDERADAETLRK  | 2833.44 | 2833.44 | 0.00  | 1.50   | 2.E-37 |
| P08758 | (41)AQVLRGTVTDFPGFDERADAETLRK  | 2833.39 | 2833.44 | -0.05 | -17.45 | 2.E-37 |
| Q8WWI1 | RTPNNVSTPAPSPDASQLASSLSSQK     | 2738.38 | 2738.38 | 0.00  | 1.40   | 2.E-37 |
| P36578 | APIRPDIVNFVHTNLRK              | 1989.13 | 1989.13 | 0.00  | 0.77   | 2.E-37 |
| P36578 | APIRPDIVNFVHTNLRK              | 1989.10 | 1989.13 | -0.03 | -13.86 | 2.E-37 |
| P18621 | GLDVDSLIEHIQVNK                | 1777.96 | 1777.96 | 0.00  | 0.07   | 2.E-37 |
| Q53F64 | IFVGGLNPEATEEK                 | 1502.76 | 1502.76 | 0.00  | -1.15  | 2.E-37 |

|        |                                |         |         |       |         |        |
|--------|--------------------------------|---------|---------|-------|---------|--------|
| Q53F64 | IFVGGLNPEATEEK                 | 1502.74 | 1502.76 | -0.02 | -16.19  | 2.E-37 |
| Q3BDU5 | LVRSVTVVEDDEDEDGDDLLHHHHVSGSRR | 3422.62 | 3422.62 | 0.00  | 0.95    | 2.E-37 |
| P22626 | RGFGFVTFDDHDPVDK               | 1854.85 | 1850.86 | 3.99  | 2153.69 | 3.E-37 |
| P07355 | AYTNFDAERDALNIETAIK            | 2154.07 | 2154.06 | 0.01  | 3.86    | 4.E-37 |
| P35659 | SICEVLDLERSGVNSELVK            | 2146.09 | 2146.09 | 0.00  | 1.98    | 4.E-37 |
| O75531 | PVGSLAGIGEVLGK                 | 1295.74 | 1295.74 | 0.00  | 0.34    | 4.E-37 |
| P60709 | IWHHTFYNELRVAPEEHPVLLTEAPLNPK  | 3449.80 | 3449.79 | 0.01  | 2.33    | 5.E-37 |
| P08758 | VLTEIIASRTPEELRAIK             | 2038.18 | 2038.18 | 0.00  | 1.18    | 5.E-37 |
| P22626 | RGFGFVTFDDHDPVDK               | 1850.86 | 1850.86 | 0.00  | -0.12   | 5.E-37 |
| P05783 | VIDDTNITRLQLETEIEALK           | 2313.25 | 2313.24 | 0.01  | 3.62    | 6.E-37 |
| P67809 | GAEAAVNTGPGGVPVQGSK            | 1694.87 | 1694.86 | 0.01  | 4.12    | 7.E-37 |
| P67809 | GAEAAVNTGPGGVPVQGSK            | 1694.86 | 1694.86 | 0.00  | 2.76    | 7.E-37 |
| P08758 | GLGTDEESILTLTSTRSNAQRQEISAAFK  | 3138.52 | 3134.62 | 3.90  | 1243.79 | 8.E-37 |
| P08758 | GLGTDEESILTLTSTRSNAQRQEISAAFK  | 3134.63 | 3134.62 | 0.01  | 1.71    | 8.E-37 |
| P22626 | RGFGFVTFDDHDPVDK               | 1854.86 | 1850.86 | 4.00  | 2155.09 | 9.E-37 |

|        |                          |         |         |       |        |        |
|--------|--------------------------|---------|---------|-------|--------|--------|
| P22626 | RGFGFVTFDDHDPVDK         | 1851.97 | 1850.86 | 1.11  | 599.68 | 9.E-37 |
| P22626 | RGFGFVTFDDHDPVDK         | 1850.86 | 1850.86 | 0.00  | 1.07   | 9.E-37 |
| P22626 | RGFGFVTFDDHDPVDK         | 1850.84 | 1850.86 | -0.02 | -9.68  | 9.E-37 |
| P13645 | VRALEESNYELEGK           | 1635.81 | 1635.81 | 0.00  | 1.29   | 1.E-36 |
| P04083 | ALTGHLEEVVLALLK          | 1604.95 | 1604.95 | 0.00  | 0.75   | 1.E-36 |
| P19338 | FGYVDFESAEDLEK           | 1647.73 | 1647.73 | 0.00  | 1.03   | 1.E-36 |
| P05783 | VIDDTNITRLQLETEIEALK     | 2313.25 | 2313.24 | 0.01  | 2.63   | 1.E-36 |
| P05783 | VIDDTNITRLQLETEIEALK     | 2313.21 | 2313.24 | -0.03 | -14.88 | 1.E-36 |
| Q13885 | GHYTEGAELVDSVLDVVRK      | 2086.07 | 2086.07 | 0.00  | 1.90   | 1.E-36 |
| P11940 | VDEAVAVLQAHQAK           | 1477.79 | 1477.79 | 0.00  | 0.50   | 2.E-36 |
| Q9BZJ0 | APAEVQITAEQLLREAK        | 1866.02 | 1866.02 | 0.00  | 1.11   | 2.E-36 |
| P61978 | GSDFDCELRLLIHQSLAGGIIGVK | 2597.36 | 2597.36 | 0.00  | -1.00  | 2.E-36 |
| P09651 | GGNFGGRSSGPYGGGGQYFAK    | 2019.92 | 2019.92 | 0.00  | 0.75   | 2.E-36 |
| O75367 | GVTIASGGVLPNIHPELLAK     | 1985.13 | 1985.13 | 0.00  | -1.06  | 3.E-36 |
| O75531 | PVGSLAGIGEVLGK           | 1295.74 | 1295.74 | 0.00  | 0.57   | 3.E-36 |

|        |                                |         |         |       |          |        |
|--------|--------------------------------|---------|---------|-------|----------|--------|
| O00571 | SPILVATAVAARGLDISNVK           | 1994.15 | 1994.15 | 0.00  | -1.19    | 3.E-36 |
| P22626 | RGFGFVTFDDHDPVDK               | 1854.86 | 1850.86 | 4.00  | 2154.72  | 4.E-36 |
| Q53HU8 | VELQELNDRFANYIDK               | 1965.99 | 1965.98 | 0.01  | 3.12     | 4.E-36 |
| P22626 | RGFGFVTFDDHDPVDK               | 1850.86 | 1850.86 | 0.00  | 0.91     | 5.E-36 |
| P51991 | GGSFGRSSGSPYGGGYGSGGGSGGYGSRRF | 2831.24 | 2831.24 | 0.00  | -0.52    | 5.E-36 |
| P51991 | GGSFGRSSGSPYGGGYGSGGGSGGYGSRRF | 2831.18 | 2831.24 | -0.06 | -21.68   | 5.E-36 |
| O60506 | LDEIYVAGLVAHSDLDERAIEALK       | 2639.38 | 2639.38 | 0.00  | -1.20    | 5.E-36 |
| P35527 | VQALEEANNDLENK                 | 1588.68 | 1585.76 | 2.92  | 1839.67  | 5.E-36 |
| P35527 | VQALEEANNDLENK                 | 1585.76 | 1585.76 | 0.00  | 0.47     | 5.E-36 |
| Q92499 | ALIVEPSRELAEQTLNNIK            | 2137.17 | 2137.17 | 0.00  | -0.68    | 6.E-36 |
| P07355 | SALSGHLETVILGLLK               | 1649.97 | 1649.97 | 0.00  | 0.57     | 6.E-36 |
| P07355 | SALSGHLETVILGLLK               | 1649.94 | 1649.97 | -0.03 | -16.95   | 6.E-36 |
| P09651 | RGFAFVTFDDHDSVDK               | 1854.85 | 1854.85 | 0.00  | 1.65     | 6.E-36 |
| P09651 | RGFAFVTFDDHDSVDK               | 1851.97 | 1854.85 | -2.88 | -1557.50 | 8.E-36 |
| P02533 | TEELNREVATNSELVQSGK            | 2103.05 | 2103.04 | 0.01  | 3.01     | 9.E-36 |

|        |                                    |         |         |       |          |        |
|--------|------------------------------------|---------|---------|-------|----------|--------|
| Q9BZJ0 | APAEVQITAEQLLREAK                  | 1870.01 | 1866.02 | 3.99  | 2135.79  | 9.E-36 |
| Q9BZJ0 | APAEVQITAEQLLREAK                  | 1866.02 | 1866.02 | 0.00  | 0.25     | 9.E-36 |
| O43390 | IPRDLYEDELVPLFEK                   | 1975.03 | 1975.03 | 0.00  | 0.51     | 1.E-35 |
| P09651 | RGFAFVTFDDHDSVDK                   | 1850.86 | 1854.85 | -3.99 | -2156.85 | 1.E-35 |
| P05388 | ISRGTIEILSDVQLIK                   | 1784.04 | 1784.04 | 0.00  | 1.56     | 1.E-35 |
| Q86V81 | LLVSNLDFGVSDADIQELFAEFGTLK         | 2840.44 | 2840.45 | -0.01 | -3.18    | 1.E-35 |
| O75531 | PVGSLAGIGEVLGK                     | 1297.65 | 1295.74 | 1.91  | 1469.15  | 1.E-35 |
| P62277 | GLAPDLPEDLYHLIK                    | 1692.91 | 1692.91 | 0.00  | 1.46     | 2.E-35 |
| Q14974 | GALQYLVILTQTLTK                    | 1758.03 | 1758.03 | 0.00  | 0.80     | 2.E-35 |
| P61978 | IDEPLEGSEDRIITITGTQDQIQNAQYLLQNSVK | 3829.79 | 3828.94 | 0.85  | 222.99   | 2.E-35 |
| P61978 | IDEPLEGSEDRIITITGTQDQIQNAQYLLQNSVK | 3828.95 | 3828.94 | 0.01  | 2.30     | 2.E-35 |
| P51991 | RGFAFVTFDDHDTVDK                   | 1868.87 | 1868.87 | 0.00  | 0.28     | 3.E-35 |
| P07355 | AYTNFDAERDALNIETAIK                | 2154.07 | 2154.06 | 0.01  | 3.59     | 4.E-35 |
| O43390 | YGGPPPDSVYSGVQPGIGTEVFGK           | 2506.24 | 2506.24 | 0.00  | 1.14     | 4.E-35 |
| A6NI71 | TIPSWATLSASQLARAQK                 | 1928.05 | 1928.05 | 0.00  | 0.03     | 5.E-35 |

|        |                                 |         |         |       |         |        |
|--------|---------------------------------|---------|---------|-------|---------|--------|
| Q3BDU5 | LVRSVTVVEDEDEDEDGDDLLHHHHVSGSRR | 3421.65 | 3422.62 | -0.97 | -283.42 | 5.E-35 |
| P22626 | RGFGFVTFDDHDPVDK                | 1854.86 | 1850.86 | 4.00  | 2155.31 | 6.E-35 |
| P22626 | RGFGFVTFDDHDPVDK                | 1851.97 | 1850.86 | 1.11  | 599.68  | 6.E-35 |
| P22626 | RGFGFVTFDDHDPVDK                | 1850.86 | 1850.86 | 0.00  | 1.18    | 6.E-35 |
| P07355 | SALSGHLETVILGLLK                | 1649.97 | 1649.97 | 0.00  | 0.32    | 6.E-35 |
| P07355 | SALSGHLETVILGLLK                | 1649.95 | 1649.97 | -0.02 | -11.01  | 6.E-35 |
| P07355 | SALSGHLETVILGLLK                | 1649.93 | 1649.97 | -0.04 | -21.62  | 6.E-35 |
| P46782 | TIAECLADELINAAK                 | 1630.82 | 1630.82 | 0.00  | 1.54    | 7.E-35 |
| P46782 | TIAECLADELINAAK                 | 1630.79 | 1630.82 | -0.03 | -16.98  | 7.E-35 |
| P52597 | ITGEAFVQFASQELAEK               | 1866.94 | 1866.94 | 0.00  | 2.62    | 8.E-35 |
| Q07020 | ILTFDQLALDSPK                   | 1459.79 | 1459.79 | 0.00  | 0.95    | 8.E-35 |
| P12956 | IQVTPPGFQLVFLPFADDK             | 2131.14 | 2131.14 | 0.00  | -0.62   | 1.E-34 |
| P52597 | ITGEAFVQFASQELAEK               | 1866.95 | 1866.94 | 0.01  | 3.16    | 1.E-34 |
| P62910 | AIVERAAQLAIRVTNPARNLRSEENE      | 2919.59 | 2919.56 | 0.03  | 9.28    | 1.E-34 |
| P62910 | AIVERAAQLAIRVTNPARNLRSEENE      | 2919.53 | 2919.56 | -0.03 | -9.53   | 1.E-34 |

|        |                               |         |         |       |         |        |
|--------|-------------------------------|---------|---------|-------|---------|--------|
| P33992 | IPGIIAASAVRAK                 | 1378.87 | 1378.87 | 0.00  | -0.13   | 1.E-34 |
| Q53HU8 | VELQELNDRFANYIDK              | 1965.99 | 1965.98 | 0.01  | 2.91    | 1.E-34 |
| Q16576 | IGEEQSAEDAEDGPELLFIHGGHTAK    | 2846.35 | 2846.34 | 0.01  | 3.05    | 1.E-34 |
| Q08945 | (41)AETLEFNDVYQEVK            | 1725.81 | 1725.81 | 0.00  | 0.32    | 2.E-34 |
| Q08945 | (41)AETLEFNDVYQEVK            | 1724.72 | 1725.81 | -1.09 | -631.67 | 2.E-34 |
| Q14103 | IFVGGLSPDTPPEEK               | 1487.75 | 1487.75 | 0.00  | -0.36   | 2.E-34 |
| Q14103 | IFVGGLSPDTPPEEK               | 1487.73 | 1487.75 | -0.02 | -16.29  | 2.E-34 |
| P08758 | VLTEIIASRTPEELRAIK            | 2038.18 | 2038.18 | 0.00  | 0.59    | 2.E-34 |
| P40429 | FAYLGRLAHEVGWK                | 1645.87 | 1645.87 | 0.00  | 0.82    | 2.E-34 |
| P09651 | RGFAFVTFDDHDSVDK              | 1854.85 | 1854.85 | 0.00  | 1.01    | 2.E-34 |
| P07355 | AYTNFDAERDALNIETAIK           | 2154.07 | 2154.06 | 0.01  | 3.49    | 2.E-34 |
| P07355 | AYTNFDAERDALNIETAIK           | 2154.07 | 2154.06 | 0.01  | 2.38    | 2.E-34 |
| P08758 | GLGTDEESILTLTSSRSNAQRQEISAAFK | 3134.62 | 3134.62 | 0.00  | 0.15    | 2.E-34 |
| P20700 | VDLENRCQSLTEDLEFRK            | 2251.09 | 2251.09 | 0.00  | 1.26    | 2.E-34 |
| P62913 | VLEQLTGQTPVFSK                | 1545.84 | 1545.84 | 0.00  | 1.40    | 2.E-34 |



|        |                                |         |         |       |          |        |
|--------|--------------------------------|---------|---------|-------|----------|--------|
| P62913 | VLEQLTGQTPVFSK                 | 1541.80 | 1545.84 | -4.04 | -2623.52 | 2.E-34 |
| P07355 | GDLENAFLNLVQCIQNK              | 1976.16 | 1974.98 | 1.18  | 598.39   | 2.E-34 |
| P07355 | GDLENAFLNLVQCIQNK              | 1974.98 | 1974.98 | 0.00  | 1.68     | 2.E-34 |
| P07355 | GDLENAFLNLVQCIQNK              | 1973.15 | 1974.98 | -1.83 | -928.92  | 2.E-34 |
| Q3BDU5 | LVRSVTVVEDDEDEDGDDLLHHHHVSGSRR | 3422.62 | 3422.62 | 0.00  | 0.48     | 2.E-34 |
| P22626 | RGFGFVTFDDHDPVDK               | 1850.86 | 1850.86 | 0.00  | 1.02     | 2.E-34 |
| P43243 | RGAPPSSNIEDFHGLLPK             | 1934.11 | 1934.00 | 0.11  | 56.84    | 3.E-34 |
| P43243 | RGAPPSSNIEDFHGLLPK             | 1934.00 | 1934.00 | 0.00  | 1.16     | 3.E-34 |
| P43243 | RGAPPSSNIEDFHGLLPK             | 1933.03 | 1934.00 | -0.97 | -501.78  | 3.E-34 |
| P36578 | APIRPDIVNFVHTNLRK              | 1989.13 | 1989.13 | 0.00  | 0.92     | 3.E-34 |
| P36578 | APIRPDIVNFVHTNLRK              | 1989.11 | 1989.13 | -0.02 | -12.15   | 3.E-34 |
| P06748 | VDNDENEHQLSLRTVSLGAGAK         | 2352.17 | 2352.17 | 0.00  | 0.20     | 3.E-34 |
| P13645 | VRALEESNYELEGK                 | 1640.76 | 1635.81 | 4.95  | 3019.21  | 3.E-34 |
| Q00839 | NQSQGYNQWQQGQFWGQK             | 2210.99 | 2210.99 | 0.00  | 1.85     | 3.E-34 |
| Q53HU8 | VELQELNDRFANYIDK               | 1965.99 | 1965.98 | 0.01  | 3.42     | 3.E-34 |

|        |                           |         |         |       |          |        |
|--------|---------------------------|---------|---------|-------|----------|--------|
| P11021 | SQIFSTASDNQPTVTIK         | 1835.93 | 1835.93 | 0.00  | -0.65    | 3.E-34 |
| P11021 | SQIFSTASDNQPTVTIK         | 1835.89 | 1835.93 | -0.04 | -19.77   | 3.E-34 |
| Q13813 | IAALQAFADQLIAAGHYAK       | 1971.06 | 1971.06 | 0.00  | 0.43     | 4.E-34 |
| O43390 | VLFVRNLATTVTEEILEK        | 2074.17 | 2074.17 | 0.00  | 0.55     | 4.E-34 |
| O43390 | VLFVRNLATTVTEEILEK        | 2070.21 | 2074.17 | -3.96 | -1912.88 | 4.E-34 |
| P67809 | GAEAAVNTGPGGVPVQGSK       | 1694.87 | 1694.86 | 0.01  | 4.95     | 4.E-34 |
| P46782 | TIAECLADELINA AK          | 1630.82 | 1630.82 | 0.00  | 0.37     | 5.E-34 |
| P46782 | TIAECLADELINA AK          | 1630.79 | 1630.82 | -0.03 | -17.84   | 5.E-34 |
| P13645 | VRALEESNYELEGK            | 1635.81 | 1635.81 | 0.00  | 1.48     | 5.E-34 |
| Q53F64 | IFVGGLNPEATEEK            | 1502.76 | 1502.76 | 0.00  | -0.16    | 5.E-34 |
| Q9NQ4  | EARA VLT FALDSVERK        | 1803.98 | 1803.98 | 0.00  | 1.19     | 6.E-34 |
| Q13885 | GHYTEGAELVDSVLDVVRK       | 2086.07 | 2086.07 | 0.00  | 2.04     | 7.E-34 |
| P06748 | VDNDENEHQLSLR TVSLGAGAK   | 2355.16 | 2352.17 | 2.99  | 1269.08  | 7.E-34 |
| Q00839 | PYFPIPEEYTFIQNVPLEDRVRGPK | 3003.56 | 3003.55 | 0.01  | 1.70     | 8.E-34 |
| P26599 | LPIDVTEGEVISLGLPFGK       | 1983.10 | 1983.09 | 0.01  | 2.68     | 9.E-34 |

|        |                                 |         |         |       |         |        |
|--------|---------------------------------|---------|---------|-------|---------|--------|
| P26368 | LFIGGLPNYLNDQVK                 | 1807.88 | 1804.94 | 2.94  | 1623.72 | 9.E-34 |
| P26368 | LFIGGLPNYLNDQVK                 | 1806.95 | 1804.94 | 2.01  | 1113.75 | 9.E-34 |
| Q9UKV3 | AAPCIYWLPLTDSQIVQK              | 2102.09 | 2102.09 | 0.00  | -0.01   | 1.E-33 |
| P46782 | TIAECLADELINA AK                | 1630.82 | 1630.82 | 0.00  | 1.54    | 1.E-33 |
| P46782 | TIAECLADELINA AK                | 1630.79 | 1630.82 | -0.03 | -16.98  | 1.E-33 |
| P07355 | GDLENAFLNLVQCIQNK               | 1976.16 | 1974.98 | 1.18  | 598.24  | 1.E-33 |
| P07355 | GDLENAFLNLVQCIQNK               | 1974.98 | 1974.98 | 0.00  | 0.61    | 1.E-33 |
| P07355 | GDLENAFLNLVQCIQNK               | 1973.15 | 1974.98 | -1.83 | -928.86 | 1.E-33 |
| P39023 | FSAPRHGSLGFLPRK                 | 1668.92 | 1668.92 | 0.00  | 1.73    | 1.E-33 |
| Q9Y230 | IAGRAVLIAGQP GTGK               | 1507.88 | 1507.88 | 0.00  | 2.91    | 2.E-33 |
| P62910 | AIVERAAQLAIRVTNPNARLRSEENE      | 2919.56 | 2919.56 | 0.00  | 0.41    | 2.E-33 |
| O75533 | AIGPHDVLATLLNNLK                | 1687.96 | 1687.96 | 0.00  | 1.21    | 2.E-33 |
| P80723 | AQGPAASAE EPK PVEAPAANS DQTVTVK | 2762.38 | 2762.37 | 0.01  | 2.79    | 2.E-33 |
| P80723 | AQGPAASAE EPK PVEAPAANS DQTVTVK | 2762.32 | 2762.37 | -0.05 | -17.09  | 2.E-33 |
| Q9Y230 | IAGRAVLIAGQP GTGK               | 1509.85 | 1507.88 | 1.97  | 1306.14 | 3.E-33 |

|        |                                |         |         |       |         |        |
|--------|--------------------------------|---------|---------|-------|---------|--------|
| Q9Y3B9 | (41)AAAAPDSRVSEENLK            | 1727.83 | 1727.83 | 0.00  | -0.06   | 3.E-33 |
| P43243 | ITPENLPQILLQLK                 | 1618.97 | 1618.97 | 0.00  | 0.70    | 3.E-33 |
| P43243 | ITPENLPQILLQLK                 | 1618.94 | 1618.97 | -0.03 | -15.98  | 3.E-33 |
| P22626 | RGFGFVTFDDHDPVDK               | 1854.86 | 1850.86 | 4.00  | 2155.25 | 3.E-33 |
| P49756 | EDIFRRFPVAPLIPYPLITK           | 2384.36 | 2384.36 | 0.00  | 0.60    | 3.E-33 |
| O60506 | DLEGENIEIVFAKPPDQK             | 2043.05 | 2041.04 | 2.01  | 984.98  | 3.E-33 |
| P11142 | SQIHDIVLVGGSTRIPK              | 1819.03 | 1819.03 | 0.00  | -0.46   | 4.E-33 |
| Q9NYL9 | ILPVFDEPPNPTNVEESLK            | 2140.01 | 2137.09 | 2.92  | 1363.52 | 4.E-33 |
| Q9NYL9 | ILPVFDEPPNPTNVEESLK            | 2137.09 | 2137.09 | 0.00  | -0.12   | 4.E-33 |
| P22626 | RGFGFVTFDDHDPVDK               | 1851.97 | 1850.86 | 1.11  | 599.35  | 4.E-33 |
| P22626 | RGFGFVTFDDHDPVDK               | 1850.86 | 1850.86 | 0.00  | 1.40    | 4.E-33 |
| Q8NC51 | VEFNIRKPNEGADGQWK              | 1987.00 | 1986.99 | 0.01  | 3.76    | 4.E-33 |
| P02545 | RTLEGELHDLRGQVAK               | 1820.99 | 1820.99 | 0.00  | 0.35    | 5.E-33 |
| P08107 | DAGVIAGLNVLRIINEPTAAAIYGLDRTGK | 3151.74 | 3151.74 | 0.00  | -1.35   | 5.E-33 |
| Q9NY12 | VPYFNAPVYLENK                  | 1552.79 | 1552.79 | 0.00  | 0.54    | 5.E-33 |

|        |                                    |         |         |       |          |        |
|--------|------------------------------------|---------|---------|-------|----------|--------|
| P61978 | IDEPLEGSEDRIITITGTQDQIQNAQYLLQNSVK | 3828.94 | 3828.94 | 0.00  | -0.47    | 6.E-33 |
| P05783 | GLQAQIASSGLTVEVDAPK                | 1884.00 | 1883.00 | 1.00  | 531.07   | 6.E-33 |
| O75533 | LLVDVDESTLSPEEQK                   | 1800.90 | 1800.90 | 0.00  | 1.25     | 9.E-33 |
| Q08945 | (41)AETLEFNDVYQEVK                 | 1725.81 | 1725.81 | 0.00  | 0.78     | 9.E-33 |
| Q08945 | (41)AETLEFNDVYQEVK                 | 1724.72 | 1725.81 | -1.09 | -630.68  | 9.E-33 |
| Q15029 | TATITEPRGNEEAQIFRPLK               | 2270.20 | 2270.20 | 0.00  | 1.74     | 1.E-32 |
| O43390 | VLFVRNLATTVTEEILEK                 | 2074.17 | 2074.17 | 0.00  | 0.40     | 1.E-32 |
| P26368 | LFIGGLPNYLNDQVK                    | 1807.87 | 1804.94 | 2.93  | 1622.62  | 1.E-32 |
| P26368 | LFIGGLPNYLNDQVK                    | 1804.94 | 1804.94 | 0.00  | 2.54     | 1.E-32 |
| Q13435 | RGIEKPPFELPDFIK                    | 1784.98 | 1784.98 | 0.00  | 1.15     | 1.E-32 |
| Q13435 | RGIEKPPFELPDFIK                    | 1784.96 | 1784.98 | -0.02 | -11.96   | 1.E-32 |
| P11142 | SQIHDIVLVGGSTRIPK                  | 1814.99 | 1819.03 | -4.04 | -2226.76 | 1.E-32 |
| P02545 | KEGDLIAAQARLK                      | 1411.81 | 1411.81 | 0.00  | 0.51     | 1.E-32 |
| Q9Y230 | IAGRAVLIAGQP GTGK                  | 1507.88 | 1507.88 | 0.00  | 2.91     | 1.E-32 |
| P08758 | (41)AQLRGTVTDFPGFDERADAETLRK       | 2833.44 | 2833.44 | 0.00  | 1.22     | 1.E-32 |

|        |                                                            |         |         |       |          |        |
|--------|------------------------------------------------------------|---------|---------|-------|----------|--------|
| P05787 | TEISEMNRNISRLLQAEIEGLK                                     | 2430.26 | 2430.25 | 0.01  | 2.24     | 2.E-32 |
| P62913 | VLEQLTGQTPVFSK                                             | 1545.84 | 1545.84 | 0.00  | 0.62     | 2.E-32 |
| P62913 | VLEQLTGQTPVFSK                                             | 1545.81 | 1545.84 | -0.03 | -16.78   | 2.E-32 |
| P62913 | VLEQLTGQTPVFSK                                             | 1543.89 | 1545.84 | -1.95 | -1262.03 | 2.E-32 |
| P62913 | VLEQLTGQTPVFSK                                             | 1541.79 | 1545.84 | -4.05 | -2623.78 | 2.E-32 |
| P02545 | KEGDLIAAQRLLK                                              | 1415.62 | 1411.81 | 3.81  | 2694.72  | 2.E-32 |
| Q9UKX7 | VAAETQSPSLFGSTK                                            | 1526.75 | 1521.77 | 4.98  | 3264.73  | 2.E-32 |
| P67809 | (51)SSEAETQPPAAPPAAPALSAADTKPGTTGSGAGSGGP<br>GGLTSAAPAGGDK | 4513.17 | 4513.15 | 0.02  | 3.77     | 2.E-32 |
| P67809 | (51)SSEAETQPPAAPPAAPALSAADTKPGTTGSGAGSGGP<br>GGLTSAAPAGGDK | 4512.05 | 4513.15 | -1.10 | -244.06  | 2.E-32 |
| P30876 | GEIGDATPFNDVAVNVQK                                         | 1773.85 | 1773.85 | 0.00  | 1.63     | 2.E-32 |
| Q9Y230 | IAGRAVLIAGQPVTGK                                           | 1510.83 | 1507.88 | 2.95  | 1952.69  | 2.E-32 |
| Q9Y230 | IAGRAVLIAGQPVTGK                                           | 1509.85 | 1507.88 | 1.97  | 1306.60  | 2.E-32 |
| O43390 | IPRDLYEDELVPLFEK                                           | 1975.03 | 1975.03 | 0.00  | 1.17     | 2.E-32 |
| P30876 | GEIGDATPFNDVAVNVQK                                         | 1773.85 | 1773.85 | 0.00  | 1.46     | 2.E-32 |
| Q9UKX7 | VAAETQSPSLFGSTK                                            | 1521.77 | 1521.77 | 0.00  | 2.85     | 2.E-32 |

|        |                       |         |         |       |         |        |
|--------|-----------------------|---------|---------|-------|---------|--------|
| P09661 | NAIANASTLAEVERLK      | 1698.93 | 1698.93 | 0.00  | 0.87    | 2.E-32 |
| Q09028 | TPSSDVLVFDYTK         | 1474.88 | 1470.72 | 4.16  | 2821.84 | 3.E-32 |
| Q09028 | TPSSDVLVFDYTK         | 1470.72 | 1470.72 | 0.00  | 2.38    | 3.E-32 |
| P11142 | SQIHDIVLVGGSTRIPK     | 1819.03 | 1819.03 | 0.00  | -0.02   | 3.E-32 |
| P26368 | LFIGGLPNYLNDQVK       | 1806.95 | 1804.94 | 2.01  | 1113.14 | 4.E-32 |
| Q15287 | GYAYVEFENPDEAEK       | 1761.86 | 1759.76 | 2.10  | 1191.88 | 6.E-32 |
| P19338 | VEGTEPTTAFNLFVGNLNFNK | 2311.15 | 2311.15 | 0.00  | 0.12    | 6.E-32 |
| P07305 | YSDMIVAAIQAEK         | 1444.74 | 1437.72 | 7.02  | 4861.81 | 6.E-32 |
| Q14103 | IFVGGLSPDTPEEK        | 1487.75 | 1487.75 | 0.00  | 0.04    | 7.E-32 |
| Q14103 | IFVGGLSPDTPEEK        | 1487.73 | 1487.75 | -0.02 | -16.22  | 7.E-32 |
| P08670 | VESLQEEIAFLK          | 1404.75 | 1404.75 | 0.00  | 1.91    | 7.E-32 |
| Q9UKX7 | VAAETQSPSLFGSTK       | 1526.75 | 1521.77 | 4.98  | 3264.54 | 8.E-32 |
| Q15287 | GYAYVEFENPDEAEK       | 1759.77 | 1759.76 | 0.01  | 3.42    | 9.E-32 |
| P07355 | LSLEGDHSTPPSAYGSVK    | 1843.90 | 1843.90 | 0.00  | -0.15   | 9.E-32 |
| Q9UKM9 | SNIDALLSRLEQIAAEQK    | 1998.07 | 1998.07 | 0.00  | -1.02   | 1.E-31 |

|        |                      |         |         |       |         |        |
|--------|----------------------|---------|---------|-------|---------|--------|
| P36578 | (41)ACARPLISVYSEK    | 1534.81 | 1534.78 | 0.03  | 22.75   | 1.E-31 |
| P36578 | (41)ACARPLISVYSEK    | 1534.78 | 1534.78 | 0.00  | 1.38    | 1.E-31 |
| P36578 | (41)ACARPLISVYSEK    | 1534.76 | 1534.78 | -0.02 | -14.97  | 1.E-31 |
| P36578 | (41)ACARPLISVYSEK    | 1534.74 | 1534.78 | -0.04 | -29.11  | 1.E-31 |
| P07355 | AYTNFDAERDALNIETAIK  | 2154.07 | 2154.06 | 0.01  | 3.26    | 1.E-31 |
| P05783 | GLQAQIASSGLTVEVDAPK  | 1885.01 | 1883.00 | 2.01  | 1067.70 | 1.E-31 |
| O60506 | ALLERTGYTLDVTTGQRK   | 2025.08 | 2021.09 | 3.99  | 1968.31 | 1.E-31 |
| O60506 | ALLERTGYTLDVTTGQRK   | 2021.09 | 2021.09 | 0.00  | 0.48    | 1.E-31 |
| A6NEM2 | IPPSSAPTVLSVPAGTTIVK | 1934.11 | 1934.11 | 0.00  | 1.87    | 1.E-31 |
| A6NI71 | TIPSWATLSASQLARAQK   | 1928.05 | 1928.05 | 0.00  | -0.12   | 1.E-31 |
| Q09028 | TPSSDVLVFDYTK        | 1470.72 | 1470.72 | 0.00  | 2.38    | 1.E-31 |
| P19338 | FGYVDFESAEDLEK       | 1648.81 | 1647.73 | 1.08  | 652.72  | 1.E-31 |
| P19338 | FGYVDFESAEDLEK       | 1647.73 | 1647.73 | 0.00  | 0.91    | 1.E-31 |
| Q9UKX7 | VAAETQSPSLFGSTK      | 1521.77 | 1521.77 | 0.00  | 2.59    | 1.E-31 |
| Q9NYL9 | ILPVFDEPPNPTNVEESLK  | 2137.09 | 2137.09 | 0.00  | 0.91    | 1.E-31 |



|        |                                     |         |         |       |          |        |
|--------|-------------------------------------|---------|---------|-------|----------|--------|
| P08107 | SENVQDLLLLDVAPLSLGLLETAGGVMTALIK    | 3179.73 | 3179.74 | -0.01 | -1.78    | 2.E-31 |
| P61978 | ALRTDYNASVSPDSSGPERILSISADIETIGEILK | 3815.97 | 3815.98 | -0.01 | -3.09    | 2.E-31 |
| P08729 | LEAAIAEAEERGELALK                   | 1811.97 | 1811.96 | 0.01  | 3.68     | 2.E-31 |
| P08758 | GLGTDEESILLLLTSRSNAQRQEISAAFK       | 3134.62 | 3134.62 | 0.00  | -0.36    | 2.E-31 |
| P26373 | LATQLTGPVMPVRNVYK                   | 1887.04 | 1886.04 | 1.00  | 531.70   | 2.E-31 |
| P46782 | (52)TEWETAAPAVAETPDIK               | 1869.90 | 1869.90 | 0.00  | 2.18     | 2.E-31 |
| P11142 | SQIHDIVLVGGSTRIPK                   | 1819.03 | 1819.03 | 0.00  | 0.74     | 2.E-31 |
| P19338 | FGYVDFESAEDLEK                      | 1647.73 | 1647.73 | 0.00  | 1.22     | 2.E-31 |
| P22626 | IDTIEIITDRQSGK                      | 1587.85 | 1587.85 | 0.00  | 0.20     | 2.E-31 |
| P07355 | AYTNFDAERDALNIETAIK                 | 2154.06 | 2154.06 | 0.00  | -0.55    | 2.E-31 |
| Q53F64 | IFVGGLNPEATEEK                      | 1502.76 | 1502.76 | 0.00  | 0.71     | 2.E-31 |
| O60506 | ALLERTGYTLDVTTGQRK                  | 2021.09 | 2021.09 | 0.00  | 1.42     | 2.E-31 |
| P08133 | ALIEILATRTNAEIRAINAYK               | 2472.37 | 2472.37 | 0.00  | -1.24    | 3.E-31 |
| O75955 | LPQVAEEISGPLTSANK                   | 1752.93 | 1752.93 | 0.00  | 2.66     | 4.E-31 |
| O75955 | LPQVAEEISGPLTSANK                   | 1751.04 | 1752.93 | -1.89 | -1078.76 | 4.E-31 |

|        |                                  |         |         |       |          |        |
|--------|----------------------------------|---------|---------|-------|----------|--------|
| P02545 | AA YEAE LGDARK                   | 1292.64 | 1292.64 | 0.00  | 0.74     | 4.E-31 |
| Q9Y265 | TALALAI AQELGSK                  | 1384.79 | 1384.79 | 0.00  | 1.41     | 4.E-31 |
| P19338 | VEGTEPTTAFNLFVGNLNFNK            | 2311.15 | 2311.15 | 0.00  | -0.62    | 4.E-31 |
| O43390 | DYAFVHFEDRGA AVK                 | 1723.83 | 1723.83 | 0.00  | 0.83     | 4.E-31 |
| P19338 | EVFEDAAEIRLVSK                   | 1604.84 | 1604.84 | 0.00  | 0.03     | 4.E-31 |
| P05783 | VIDDTNITRLQLETEIEALK             | 2313.25 | 2313.24 | 0.01  | 3.88     | 4.E-31 |
| P09651 | GGNFGGRSSGPYGGGGQYFAK            | 2020.92 | 2019.92 | 1.00  | 496.61   | 5.E-31 |
| Q9H307 | (41)AVAVRTLQE QLEK               | 1525.85 | 1525.85 | 0.00  | 1.89     | 5.E-31 |
| Q00839 | NQSQGYNQWQQGQFWGQK               | 2210.99 | 2210.99 | 0.00  | 1.67     | 5.E-31 |
| Q9NWB6 | LIEEETARRVEELVAK                 | 1884.03 | 1884.03 | 0.00  | 0.11     | 5.E-31 |
| Q3BDU5 | LVR SVTVVEDEDEDEDGDDLLHHHHVSGSRR | 3422.62 | 3422.62 | 0.00  | -0.75    | 5.E-31 |
| Q04695 | ILTATVDNANILLQIDNARLAADDFRTK     | 3084.66 | 3084.66 | 0.00  | 1.26     | 5.E-31 |
| P07355 | SALSGHLETVILGLLK                 | 1649.97 | 1649.97 | 0.00  | 0.45     | 5.E-31 |
| P11021 | LYGSAGPPPTGEEDTAEK               | 1817.83 | 1817.83 | 0.00  | 0.55     | 5.E-31 |
| P11021 | LYGSAGPPPTGEEDTAEK               | 1815.95 | 1817.83 | -1.88 | -1034.77 | 5.E-31 |

|        |                                |         |         |       |         |        |
|--------|--------------------------------|---------|---------|-------|---------|--------|
| P14136 | LALDIEIATYRK                   | 1404.80 | 1404.80 | 0.00  | 0.26    | 6.E-31 |
| O43390 | VLFVRNLATTVTEEILEK             | 2074.17 | 2074.17 | 0.00  | -1.43   | 6.E-31 |
| O43390 | VTEGLVDVILYHQPDDK              | 1939.99 | 1939.99 | 0.00  | -0.86   | 7.E-31 |
| P06748 | VDNDENEHQLSLRTVSLGAGAK         | 2353.11 | 2352.17 | 0.94  | 398.02  | 7.E-31 |
| P06748 | VDNDENEHQLSLRTVSLGAGAK         | 2352.17 | 2352.17 | 0.00  | 1.01    | 7.E-31 |
| Q12906 | LFPDTPLALDANK                  | 1415.71 | 1413.75 | 1.96  | 1384.93 | 7.E-31 |
| Q12906 | LFPDTPLALDANK                  | 1413.75 | 1413.75 | 0.00  | 1.10    | 7.E-31 |
| Q3BDU5 | LVRSVTVVEDDEDEDGDDLLHHHHVSGSRR | 3422.62 | 3422.62 | 0.00  | 0.45    | 7.E-31 |
| Q9UBL3 | FGLLDQDLSNIGPAYDNQK            | 2107.02 | 2107.02 | 0.00  | 1.54    | 7.E-31 |
| O43390 | VTEGLVDVILYHQPDDK              | 1939.99 | 1939.99 | 0.00  | -0.81   | 8.E-31 |
| P07355 | DIISDTSGDFRK                   | 1353.70 | 1352.66 | 1.04  | 766.80  | 8.E-31 |
| P07355 | DIISDTSGDFRK                   | 1352.78 | 1352.66 | 0.12  | 90.42   | 8.E-31 |
| P07355 | DIISDTSGDFRK                   | 1352.66 | 1352.66 | 0.00  | 1.05    | 8.E-31 |
| P07355 | DIISDTSGDFRK                   | 1352.64 | 1352.66 | -0.02 | -12.78  | 8.E-31 |
| Q9Y5B9 | APGEQTVPALNLQNAFRIIK           | 2179.21 | 2179.21 | 0.00  | 1.42    | 8.E-31 |

|        |                              |         |         |       |          |        |
|--------|------------------------------|---------|---------|-------|----------|--------|
| Q04695 | ILTATVDNANILLQIDNARLAADDFRTK | 3084.67 | 3084.66 | 0.01  | 2.40     | 8.E-31 |
| O43390 | EIEGEEIEIVLAKPPDK            | 1908.01 | 1908.01 | 0.00  | 1.09     | 8.E-31 |
| P05783 | VIDDTNITRLQLETEIEALK         | 2313.25 | 2313.24 | 0.01  | 3.97     | 8.E-31 |
| Q02539 | ALAAAGYDVEK                  | 1107.55 | 1106.56 | 0.99  | 893.90   | 8.E-31 |
| Q02539 | ALAAAGYDVEK                  | 1107.55 | 1106.56 | 0.99  | 893.90   | 8.E-31 |
| Q02539 | ALAAAGYDVEK                  | 1106.56 | 1106.56 | 0.00  | 0.67     | 8.E-31 |
| P14136 | LALDIEIATYRK                 | 1404.80 | 1404.80 | 0.00  | 0.54     | 9.E-31 |
| P02545 | RTLEGELHDLRGQVAK             | 1820.99 | 1820.99 | 0.00  | 0.24     | 9.E-31 |
| P02545 | RTLEGELHDLRGQVAK             | 1820.97 | 1820.99 | -0.02 | -10.90   | 9.E-31 |
| P02545 | RTLEGELHDLRGQVAK             | 1819.04 | 1820.99 | -1.95 | -1073.90 | 9.E-31 |
| P07355 | SALSGHLETVILGLLK             | 1649.97 | 1649.97 | 0.00  | 0.38     | 9.E-31 |
| P07355 | SALSGHLETVILGLLK             | 1649.94 | 1649.97 | -0.03 | -16.34   | 9.E-31 |
| Q8NDI4 | LFNESHGIFLGLQRIDEELTGK       | 2515.31 | 2515.31 | 0.00  | -1.60    | 1.E-30 |
| P33778 | RSTITSREIQTAVRLLPGELAK       | 2551.48 | 2551.48 | 0.00  | 1.83     | 1.E-30 |
| P33778 | RSTITSREIQTAVRLLPGELAK       | 2551.45 | 2551.48 | -0.03 | -11.89   | 1.E-30 |

|        |                          |         |         |      |         |        |
|--------|--------------------------|---------|---------|------|---------|--------|
| P14136 | LALDIEIATYRK             | 1404.80 | 1404.80 | 0.00 | 2.04    | 1.E-30 |
| P11940 | GYGFVHFETQEAERAIEK       | 2181.05 | 2181.05 | 0.00 | -1.16   | 1.E-30 |
| P07355 | GDLENAFLNLVQCIQNK        | 1975.15 | 1974.98 | 0.17 | 86.83   | 1.E-30 |
| P07355 | GDLENAFLNLVQCIQNK        | 1974.98 | 1974.98 | 0.00 | 0.77    | 1.E-30 |
| P52597 | ITGEAFVQFASQELAIEK       | 1866.95 | 1866.94 | 0.01 | 3.43    | 1.E-30 |
| P13645 | ELTTEIDNNIEQISSYK        | 1995.97 | 1995.96 | 0.01 | 4.08    | 1.E-30 |
| P11021 | ITITNDQNRLTPEEIERMVNDAEK | 2828.40 | 2828.40 | 0.00 | -0.99   | 1.E-30 |
| P07355 | AYTNFDAERDALNIETAIK      | 2154.06 | 2154.06 | 0.00 | 1.50    | 2.E-30 |
| Q8NC51 | VEFNIRKPNEGADGQWK        | 1987.00 | 1986.99 | 0.01 | 3.40    | 2.E-30 |
| O60506 | IPRDLFEDELVPLFEK         | 1959.04 | 1959.04 | 0.00 | -0.04   | 2.E-30 |
| Q9UBL3 | FGLLDQDLSNIGPAYDNQK      | 2107.02 | 2107.02 | 0.00 | 1.73    | 2.E-30 |
| P35908 | VRFLEQQNQVLQTK           | 1729.95 | 1729.95 | 0.00 | 0.29    | 2.E-30 |
| P62701 | LTGVFAPRPSTGPHK          | 1563.85 | 1563.85 | 0.00 | -0.14   | 3.E-30 |
| O60506 | ALLERTGYTLDVTTGQRK       | 2025.07 | 2021.09 | 3.98 | 1967.72 | 3.E-30 |
| O60506 | ALLERTGYTLDVTTGQRK       | 2021.09 | 2021.09 | 0.00 | -0.06   | 3.E-30 |

|        |                               |         |         |       |         |        |
|--------|-------------------------------|---------|---------|-------|---------|--------|
| P62701 | LTGVFAPRPSTGPHK               | 1563.82 | 1563.85 | -0.03 | -16.96  | 3.E-30 |
| P02545 | AGQVVTIWAAGAGATHSPPTDLVWK     | 2532.31 | 2532.31 | 0.00  | -0.45   | 3.E-30 |
| P02545 | AGQVVTIWAAGAGATHSPPTDLVWK     | 2532.31 | 2532.31 | 0.00  | -0.89   | 3.E-30 |
| Q53HU8 | VELQELNDRFANYIDK              | 1965.99 | 1965.98 | 0.01  | 3.88    | 4.E-30 |
| P02545 | RQNGDDPLLTYRFPPK              | 1916.97 | 1915.99 | 0.98  | 513.04  | 4.E-30 |
| P62906 | VLCLAVAVGHVK                  | 1264.73 | 1264.73 | 0.00  | 0.69    | 4.E-30 |
| O43390 | IPRDLYEDELVPLFEK              | 1975.03 | 1975.03 | 0.00  | 1.93    | 4.E-30 |
| P02545 | EGDLIAAQARLK                  | 1287.73 | 1283.72 | 4.01  | 3116.86 | 4.E-30 |
| P02545 | EGDLIAAQARLK                  | 1287.73 | 1283.72 | 4.01  | 3117.48 | 4.E-30 |
| P60709 | IWHHTFYNELRVAPEEHPVLLTEAPLNPK | 3449.80 | 3449.79 | 0.01  | 3.54    | 5.E-30 |
| P11021 | SQIFSTASDNQPTVTIK             | 1835.93 | 1835.93 | 0.00  | -0.71   | 5.E-30 |
| P02545 | EGDLIAAQARLK                  | 1284.71 | 1283.72 | 0.99  | 767.95  | 5.E-30 |
| P02545 | EGDLIAAQARLK                  | 1284.71 | 1283.72 | 0.99  | 767.48  | 5.E-30 |
| P02545 | EGDLIAAQARLK                  | 1283.72 | 1283.72 | 0.00  | -0.79   | 5.E-30 |
| P02545 | EGDLIAAQARLK                  | 1283.72 | 1283.72 | 0.00  | -0.71   | 5.E-30 |

|        |                           |         |         |       |          |        |
|--------|---------------------------|---------|---------|-------|----------|--------|
| P11142 | SINPDEAVAYGAAVQAAILSGDK   | 2259.14 | 2259.14 | 0.00  | 0.56     | 5.E-30 |
| P23396 | KPLPDHVSIVEPKDEILPTPISEQK | 2909.57 | 2909.57 | 0.00  | 1.19     | 5.E-30 |
| P02545 | AGQVVTIWAAGAGATHSPPTDLVWK | 2532.31 | 2532.31 | 0.00  | 0.50     | 6.E-30 |
| P22626 | IDTIEIITDRQSGK            | 1587.85 | 1587.85 | 0.00  | 2.47     | 7.E-30 |
| P22626 | IDTIEIITDRQSGK            | 1587.77 | 1587.85 | -0.08 | -51.88   | 7.E-30 |
| O60506 | ALLERTGYTLDVTTGQRK        | 2021.09 | 2021.09 | 0.00  | -0.90    | 7.E-30 |
| Q14254 | VDEIVVLSGDNSK             | 1373.70 | 1373.70 | 0.00  | 2.70     | 7.E-30 |
| P04083 | GVDEATIIDILTK             | 1391.65 | 1386.76 | 4.89  | 3513.47  | 8.E-30 |
| P04083 | GVDEATIIDILTK             | 1386.76 | 1386.76 | 0.00  | -0.05    | 8.E-30 |
| P04083 | GVDEATIIDILTK             | 1386.74 | 1386.76 | -0.02 | -14.84   | 8.E-30 |
| Q9UKM9 | SNIDALLSRLEQIAAEQK        | 1998.07 | 1998.07 | 0.00  | -1.22    | 8.E-30 |
| P11021 | SQIFSTASDNQPTVTIK         | 1839.98 | 1835.93 | 4.05  | 2198.51  | 8.E-30 |
| P02545 | RTLEGELHDLRGQVAK          | 1820.99 | 1820.99 | 0.00  | 0.63     | 9.E-30 |
| P02545 | RTLEGELHDLRGQVAK          | 1819.04 | 1820.99 | -1.95 | -1073.73 | 9.E-30 |
| P04083 | DITSDTSGDFRNALLSLAK       | 2023.02 | 2023.02 | 0.00  | 1.75     | 9.E-30 |

|        |                            |         |         |       |          |        |
|--------|----------------------------|---------|---------|-------|----------|--------|
| P20073 | GFGTDEQAIVDVVANRSNDQRQK    | 2546.26 | 2546.25 | 0.01  | 2.79     | 9.E-30 |
| P62826 | FNVWDTAGQEK                | 1293.60 | 1293.60 | 0.00  | 1.28     | 9.E-30 |
| Q15393 | NVSEELDRTPPEVSK            | 1698.85 | 1698.84 | 0.01  | 3.23     | 1.E-29 |
| O75531 | PVGSLAGIGEVLGK             | 1295.74 | 1295.74 | 0.00  | 0.57     | 1.E-29 |
| P62826 | FNVWDTAGQEK                | 1295.74 | 1293.60 | 2.14  | 1651.53  | 1.E-29 |
| Q12905 | ILPTLEAVAALGNK             | 1408.83 | 1408.83 | 0.00  | 2.25     | 1.E-29 |
| Q12905 | ILPTLEAVAALGNK             | 1408.81 | 1408.83 | -0.02 | -13.93   | 1.E-29 |
| Q12905 | ILPTLEAVAALGNK             | 1404.75 | 1408.83 | -4.08 | -2901.60 | 1.E-29 |
| Q53F64 | IFVGGLNPEATEEK             | 1502.76 | 1502.76 | 0.00  | 0.44     | 1.E-29 |
| P23396 | KPLPDHVSIVEPKDEILPTTPISEQK | 2914.42 | 2909.57 | 4.85  | 1664.30  | 1.E-29 |
| P19338 | EVFEDAAEIRLVSK             | 1605.76 | 1604.84 | 0.92  | 570.86   | 1.E-29 |
| P35659 | NVGQFSGFPFEK               | 1355.65 | 1355.65 | 0.00  | 1.94     | 1.E-29 |
| P35659 | NVGQFSGFPFEK               | 1355.63 | 1355.65 | -0.02 | -13.33   | 1.E-29 |
| P35659 | NVGQFSGFPFEK               | 1352.78 | 1355.65 | -2.87 | -2122.43 | 1.E-29 |
| P62906 | VSRDTLYEAVREVLHGNQRK       | 2369.26 | 2369.26 | 0.00  | 0.69     | 1.E-29 |



|        |                            |         |         |       |         |        |
|--------|----------------------------|---------|---------|-------|---------|--------|
| P08670 | VESLQEEIAFLK               | 1404.75 | 1404.75 | 0.00  | 1.41    | 1.E-29 |
| P08729 | LEAAIAEAEERGELALK          | 1811.96 | 1811.96 | 0.00  | 2.19    | 1.E-29 |
| P11940 | VDEAVAVLQAHQAK             | 1477.79 | 1477.79 | 0.00  | 0.44    | 1.E-29 |
| Q9NQ4  | ATLEVILRPK                 | 1139.71 | 1138.71 | 1.00  | 881.13  | 2.E-29 |
| P09012 | (41)AVPETRPNHTIYINNLNEK    | 2263.05 | 2264.15 | -1.10 | -484.50 | 2.E-29 |
| Q13243 | LNEGVVEFASYGDLK            | 1639.81 | 1639.81 | 0.00  | -0.01   | 2.E-29 |
| P19338 | EVFEDAAEIRLVSK             | 1604.84 | 1604.84 | 0.00  | 0.72    | 2.E-29 |
| Q03252 | DLESLFHRSEVELAAALSDK       | 2229.13 | 2229.13 | 0.00  | -1.96   | 2.E-29 |
| P56182 | LQDLAGGIFPEDEIPEK          | 1871.95 | 1869.94 | 2.01  | 1075.53 | 2.E-29 |
| P08670 | VESLQEEIAFLK               | 1405.73 | 1404.75 | 0.98  | 699.98  | 2.E-29 |
| P0C0S8 | VTIAQGGVLPNIQAVLLPK        | 1930.16 | 1930.16 | 0.00  | 0.47    | 2.E-29 |
| Q15393 | NVSEELDRTPPEVSK            | 1698.84 | 1698.84 | 0.00  | 2.82    | 2.E-29 |
| Q15029 | ILAQVVGDVDTSLPRTLDELGIHLTK | 2802.55 | 2802.55 | 0.00  | -1.66   | 2.E-29 |
| Q07020 | ILTFDQLALDSPK              | 1463.80 | 1459.79 | 4.01  | 2740.45 | 2.E-29 |
| Q9BQG0 | ARLSLVIRSPSLLQSGAK         | 1895.99 | 1895.13 | 0.86  | 455.59  | 2.E-29 |

|        |                                     |         |         |       |        |        |
|--------|-------------------------------------|---------|---------|-------|--------|--------|
| P07355 | SALSGHLETVILGLLK                    | 1649.97 | 1649.97 | 0.00  | 0.57   | 2.E-29 |
| P61978 | IDEPLEGESEDRIITITGTQDQIQNAQYLLQNSVK | 3828.94 | 3828.94 | 0.00  | -0.73  | 2.E-29 |
| Q04695 | (52)TTSIRQFTSSSSIK                  | 1583.80 | 1583.82 | -0.02 | -15.30 | 2.E-29 |
| P62826 | FNVWDTAGQEK                         | 1293.60 | 1293.60 | 0.00  | 1.28   | 2.E-29 |
| P09012 | (41)AVPETRPNHTIYINNLNEK             | 2264.15 | 2264.15 | 0.00  | 0.68   | 2.E-29 |
| Q15029 | TATITEPRGNEEAQIFRPLK                | 2270.20 | 2270.20 | 0.00  | 1.12   | 2.E-29 |
| P26447 | ELLTRELPSFLGK                       | 1501.85 | 1501.85 | 0.00  | 0.14   | 2.E-29 |
| P26447 | ELLTRELPSFLGK                       | 1501.83 | 1501.85 | -0.02 | -15.24 | 2.E-29 |
| Q04695 | (52)TTSIRQFTSSSSIK                  | 1583.82 | 1583.82 | 0.00  | 1.68   | 3.E-29 |
| Q15287 | GYAYVEFENPDEAEK                     | 1760.82 | 1759.76 | 1.06  | 602.58 | 3.E-29 |
| Q15287 | GYAYVEFENPDEAEK                     | 1759.77 | 1759.76 | 0.01  | 3.31   | 3.E-29 |
| P26447 | ELLTRELPSFLGK                       | 1501.85 | 1501.85 | 0.00  | -0.66  | 3.E-29 |
| P26447 | ELLTRELPSFLGK                       | 1501.83 | 1501.85 | -0.02 | -14.85 | 3.E-29 |
| Q92841 | APILIATDVASRGLDVEDVK                | 2081.14 | 2081.14 | 0.00  | 1.21   | 3.E-29 |
| P07355 | GDLENAFLNLVQCQNK                    | 1976.16 | 1974.98 | 1.18  | 597.93 | 3.E-29 |

|        |                      |         |         |       |         |        |
|--------|----------------------|---------|---------|-------|---------|--------|
| P07355 | GDLENAFLNLVQCIQNK    | 1974.98 | 1974.98 | 0.00  | 1.07    | 3.E-29 |
| P07355 | GDLENAFLNLVQCIQNK    | 1973.15 | 1974.98 | -1.83 | -929.22 | 3.E-29 |
| P51991 | LFIGGLSFETDDSLREHFEK | 2440.19 | 2440.19 | 0.00  | 0.20    | 4.E-29 |
| Q04695 | (52)TTSIRQFTSSSSIK   | 1587.83 | 1583.82 | 4.01  | 2528.59 | 4.E-29 |
| P46782 | TIAECLADELINA AK     | 1630.82 | 1630.82 | 0.00  | 0.37    | 4.E-29 |
| P46782 | TIAECLADELINA AK     | 1630.79 | 1630.82 | -0.03 | -17.84  | 4.E-29 |
| P43243 | RGAPPSSNIEDFHGLLPK   | 1936.93 | 1934.00 | 2.93  | 1512.26 | 4.E-29 |
| P43243 | RGAPPSSNIEDFHGLLPK   | 1934.00 | 1934.00 | 0.00  | 1.41    | 4.E-29 |
| P35659 | VYENYPTYDLTERK       | 1789.86 | 1789.85 | 0.01  | 3.15    | 4.E-29 |
| P43243 | RGAPPSSNIEDFHGLLPK   | 1936.93 | 1934.00 | 2.93  | 1511.84 | 4.E-29 |
| P43243 | RGAPPSSNIEDFHGLLPK   | 1934.11 | 1934.00 | 0.11  | 56.37   | 4.E-29 |
| P43243 | RGAPPSSNIEDFHGLLPK   | 1934.00 | 1934.00 | 0.00  | 2.03    | 4.E-29 |
| O75955 | DIHDDQDYLHSLGK       | 1654.76 | 1654.76 | 0.00  | 2.18    | 4.E-29 |
| Q07020 | ILTFDQLALDSPK        | 1459.79 | 1459.79 | 0.00  | 0.40    | 4.E-29 |
| Q07020 | ILTFDQLALDSPK        | 1459.77 | 1459.79 | -0.02 | -15.08  | 4.E-29 |

|        |                                            |         |         |       |          |        |
|--------|--------------------------------------------|---------|---------|-------|----------|--------|
| P02545 | AA YEAE LGDARK                             | 1292.64 | 1292.64 | 0.00  | 0.66     | 5.E-29 |
| P02545 | AA YEAE LGDARK                             | 1290.68 | 1292.64 | -1.96 | -1515.90 | 5.E-29 |
| P08758 | VLTEIIASRTPEELRAIK                         | 2038.18 | 2038.18 | 0.00  | 0.93     | 5.E-29 |
| P04083 | DITSDTSGDFRNALLSLAK                        | 2023.02 | 2023.02 | 0.00  | 1.80     | 5.E-29 |
| Q3BDU5 | LDNARQSAERNSNLVGA AHEELQQSRIRIDSLSAQLSQLQK | 4573.37 | 4573.37 | 0.00  | 0.33     | 5.E-29 |
| Q08211 | VNLSQDLEHQLQNIQELNLEILPPPEDPSVPVALNIGK     | 4326.32 | 4326.31 | 0.01  | 3.04     | 6.E-29 |
| Q08211 | VNLSQDLEHQLQNIQELNLEILPPPEDPSVPVALNIGK     | 4326.22 | 4326.31 | -0.09 | -20.42   | 6.E-29 |
| Q8TDN6 | FLVQNIHTLAELK                              | 1524.88 | 1524.87 | 0.01  | 3.49     | 7.E-29 |
| P62701 | VNDTIQIDLETGK                              | 1445.75 | 1444.74 | 1.01  | 695.34   | 7.E-29 |
| O43159 | FQPPQVPDQAPAEAPTEK                         | 1948.96 | 1948.95 | 0.01  | 4.10     | 7.E-29 |
| P19338 | EVFEDAAEIRLVSK                             | 1604.84 | 1604.84 | 0.00  | -0.03    | 7.E-29 |
| P05783 | GLQAQIASSGLTVEVDAPK                        | 1883.01 | 1883.00 | 0.01  | 3.26     | 7.E-29 |
| P08133 | ALIEILATRTNAEIRAINAYK                      | 2472.37 | 2472.37 | 0.00  | 0.29     | 8.E-29 |
| P36578 | AFRNIPGITLLNVSK                            | 1641.96 | 1641.96 | 0.00  | 1.71     | 9.E-29 |
| P62906 | VLCLAVAVGHVK                               | 1264.73 | 1264.73 | 0.00  | 0.77     | 9.E-29 |

|        |                                |         |         |       |         |        |
|--------|--------------------------------|---------|---------|-------|---------|--------|
| P62906 | VLCLAVAVGHVK                   | 1264.62 | 1264.73 | -0.11 | -84.71  | 9.E-29 |
| P52597 | ITGEAFVQFASQELA EK             | 1866.95 | 1866.94 | 0.01  | 2.78    | 1.E-28 |
| P08670 | VESLQEEIAFLK                   | 1404.75 | 1404.75 | 0.00  | 1.20    | 1.E-28 |
| P08670 | VESLQEEIAFLK                   | 1404.73 | 1404.75 | -0.02 | -13.54  | 1.E-28 |
| Q13435 | RGIEKPPFELPDFIK                | 1784.98 | 1784.98 | 0.00  | 0.87    | 1.E-28 |
| Q13435 | RGIEKPPFELPDFIK                | 1784.96 | 1784.98 | -0.02 | -11.40  | 1.E-28 |
| O43395 | DQTKPTPLILDEQGRTVDATGK         | 2382.24 | 2382.24 | 0.00  | 0.87    | 1.E-28 |
| P08758 | GLGTDEESILTLT SRSNAQRQEISAAFK  | 3138.52 | 3134.62 | 3.90  | 1244.02 | 1.E-28 |
| P08758 | GLGTDEESILTLT SRSNAQRQEISAAFK  | 3134.62 | 3134.62 | 0.00  | 0.66    | 1.E-28 |
| P02545 | LESTESRSSFSQHARTSGRVAVEEVDEEGK | 3306.57 | 3306.57 | 0.00  | 0.69    | 2.E-28 |
| Q71U36 | TIGGGDDSFNTFFSETGAGK           | 2006.90 | 2006.89 | 0.01  | 3.87    | 2.E-28 |
| O14979 | VFVGGLSPDTSEEQIK               | 1704.86 | 1704.86 | 0.00  | -0.06   | 2.E-28 |
| O95232 | IDVLLQIEELGSEGK                | 1769.94 | 1769.94 | 0.00  | 2.45    | 2.E-28 |
| Q15393 | LGAVFNQVAFPLQYTPRK             | 2048.12 | 2048.12 | 0.00  | 1.71    | 2.E-28 |
| Q9H307 | (41)AVAVRTLQE QLEK             | 1525.85 | 1525.85 | 0.00  | 1.56    | 2.E-28 |

|        |                                         |         |         |       |        |        |
|--------|-----------------------------------------|---------|---------|-------|--------|--------|
| Q9H307 | (41)AVAVRTLQEQLK                        | 1525.83 | 1525.85 | -0.02 | -14.30 | 2.E-28 |
| P02545 | AAEAEELGDARK                            | 1292.64 | 1292.64 | 0.00  | 1.05   | 2.E-28 |
| P62424 | VPPAINQFTQALDRQTATQLLK                  | 2452.34 | 2452.34 | 0.00  | 0.34   | 2.E-28 |
| P80723 | AQGPAASAEKPKVEAPAANSQTVTVK              | 2762.38 | 2762.37 | 0.01  | 2.71   | 3.E-28 |
| P43243 | RGAPPSSNIEDFHGLLPK                      | 1934.11 | 1934.00 | 0.11  | 57.00  | 3.E-28 |
| P43243 | RGAPPSSNIEDFHGLLPK                      | 1934.00 | 1934.00 | 0.00  | 1.41   | 3.E-28 |
| P14625 | EIFLRELISNASDALDK                       | 1933.02 | 1933.02 | 0.00  | -1.82  | 3.E-28 |
| P07355 | LSLEGDHSTPPSAYGSVK                      | 1843.90 | 1843.90 | 0.00  | -0.47  | 3.E-28 |
| P62241 | ISSLLEEQFQQGK                           | 1505.80 | 1505.77 | 0.03  | 20.15  | 3.E-28 |
| P62241 | ISSLLEEQFQQGK                           | 1505.77 | 1505.77 | 0.00  | -0.83  | 3.E-28 |
| P62241 | ISSLLEEQFQQGK                           | 1505.75 | 1505.77 | -0.02 | -16.17 | 3.E-28 |
| P61247 | VERADGYEPPVQESV                         | 1673.79 | 1673.79 | 0.00  | -0.62  | 3.E-28 |
| Q3BDU5 | LDNARQSAERNSNLVGAHEELQQRIRIDSLSAQLSQLQK | 4573.37 | 4573.37 | 0.00  | -0.96  | 3.E-28 |
| P34931 | VEIANDQGNRTTPSYVAFTDTERLIGDAAK          | 3364.69 | 3364.69 | 0.00  | -0.73  | 3.E-28 |
| P11940 | GYGFVHFETQEAERAIEK                      | 2181.05 | 2181.05 | 0.00  | -1.62  | 3.E-28 |

|        |                        |         |         |       |          |        |
|--------|------------------------|---------|---------|-------|----------|--------|
| Q13421 | LRTDAVLPLTVAEVQK       | 1752.02 | 1752.01 | 0.01  | 3.14     | 4.E-28 |
| P31946 | TAFDEAIAELDTLNEESYK    | 2158.00 | 2158.00 | 0.00  | 0.77     | 4.E-28 |
| Q02539 | ALAAAGYDVEK            | 1107.55 | 1106.56 | 0.99  | 893.63   | 4.E-28 |
| Q02539 | ALAAAGYDVEK            | 1106.56 | 1106.56 | 0.00  | 0.40     | 4.E-28 |
| O43390 | IPRDLYEDELVPLFEK       | 1975.03 | 1975.03 | 0.00  | 0.66     | 4.E-28 |
| P62906 | KYDAFLASESLIK          | 1481.79 | 1483.79 | -2.00 | -1346.96 | 4.E-28 |
| P02545 | AA YEAE LGDARK         | 1292.64 | 1292.64 | 0.00  | 0.82     | 4.E-28 |
| P84090 | (51)SHTILLVQPTK        | 1277.73 | 1277.73 | 0.00  | 0.50     | 4.E-28 |
| P60709 | ILTERGYSFTTTAEREIVRDIK | 2597.39 | 2597.38 | 0.01  | 2.44     | 5.E-28 |
| P62906 | KYDAFLASESLIK          | 1483.79 | 1483.79 | 0.00  | -0.35    | 5.E-28 |
| P62906 | KYDAFLASESLIK          | 1483.77 | 1483.79 | -0.02 | -14.90   | 5.E-28 |
| P26368 | LFIGGLPNYLNDQVK        | 1804.94 | 1804.94 | 0.00  | 2.26     | 5.E-28 |
| P26368 | LFIGGLPNYLNDQVK        | 1804.91 | 1804.94 | -0.03 | -17.74   | 5.E-28 |
| P07355 | SLYYYIQQDTK            | 1420.69 | 1420.69 | 0.00  | 3.00     | 5.E-28 |
| Q9H307 | LTEVPVEPVLTVHPESK      | 1873.02 | 1873.02 | 0.00  | 1.37     | 5.E-28 |

|        |                            |         |         |       |         |        |
|--------|----------------------------|---------|---------|-------|---------|--------|
| P23396 | KPLPDHVSIVEPKDEILPTTPISEQK | 2914.42 | 2909.57 | 4.85  | 1664.33 | 6.E-28 |
| P02545 | AA YEAE LGDARK             | 1292.64 | 1292.64 | 0.00  | 0.82    | 6.E-28 |
| P08729 | LEAAIAEAEER GELALK         | 1811.96 | 1811.96 | 0.00  | 2.63    | 6.E-28 |
| P04083 | AA YLQETGKPLDETLK          | 1775.94 | 1775.93 | 0.01  | 2.99    | 6.E-28 |
| P26447 | ELLTRELPSFLGK              | 1502.83 | 1501.85 | 0.98  | 649.25  | 6.E-28 |
| P26447 | ELLTRELPSFLGK              | 1501.85 | 1501.85 | 0.00  | -0.33   | 6.E-28 |
| P16403 | ASGPPVSELITK               | 1197.66 | 1197.66 | 0.00  | -0.98   | 6.E-28 |
| P16403 | ASGPPVSELITK               | 1197.65 | 1197.66 | -0.01 | -11.92  | 6.E-28 |
| Q04695 | (52)TTSIRQFTSSSSIK         | 1583.79 | 1583.82 | -0.03 | -15.87  | 6.E-28 |
| P62906 | FPSLLTHNENMVAK             | 1604.74 | 1599.81 | 4.93  | 3071.85 | 6.E-28 |
| Q9H307 | (41)AVAVRTLQE QLEK         | 1525.85 | 1525.85 | 0.00  | 2.94    | 6.E-28 |
| P02545 | EGDLIAAQARLK               | 1283.72 | 1283.72 | 0.00  | 0.69    | 7.E-28 |
| P04083 | QAWFIENEEQEYVQTVK          | 2140.02 | 2140.01 | 0.01  | 3.56    | 7.E-28 |
| P07355 | AYTNFDAERDALNIETAIK        | 2154.06 | 2154.06 | 0.00  | 1.31    | 7.E-28 |
| P05783 | VIDDTNITRLQLETEIEALK       | 2313.25 | 2313.24 | 0.01  | 3.41    | 7.E-28 |



|        |                                           |         |         |       |         |        |
|--------|-------------------------------------------|---------|---------|-------|---------|--------|
| P19338 | EVFEDAAEIRLVSK                            | 1604.84 | 1604.84 | 0.00  | 0.03    | 7.E-28 |
| P19338 | VEGTEPTTAFNLFVGNLNFNK                     | 2311.15 | 2311.15 | 0.00  | -0.44   | 7.E-28 |
| P04264 | SLNNQFASFIDK                              | 1382.68 | 1382.68 | 0.00  | 1.07    | 7.E-28 |
| Q04695 | (52)TTSIRQFTSSSSIK                        | 1583.82 | 1583.82 | 0.00  | 1.37    | 7.E-28 |
| Q3BDU5 | LDNARQSAERNSNLVGAAHEELQQSRIRIDSLSAQLSQLQK | 4573.37 | 4573.37 | 0.00  | -0.61   | 7.E-28 |
| P16403 | (51)SETAPAAPAAAPPAEK                      | 1522.91 | 1519.75 | 3.16  | 2073.91 | 7.E-28 |
| P04083 | GLGTDEDTLIEILASRTNK                       | 2045.06 | 2045.06 | 0.00  | 0.53    | 7.E-28 |
| P07355 | AYTNFDAERDALNIETAIK                       | 2154.07 | 2154.06 | 0.01  | 2.33    | 7.E-28 |
| P02533 | TEELNREVATNSELVQSGK                       | 2103.05 | 2103.04 | 0.01  | 4.06    | 7.E-28 |
| P08758 | VLTEIIASRTPEELRAIK                        | 2038.18 | 2038.18 | 0.00  | 0.39    | 8.E-28 |
| Q9H307 | (41)AVAVRTLQEQLK                          | 1525.85 | 1525.85 | 0.00  | 1.56    | 8.E-28 |
| Q9H307 | (41)AVAVRTLQEQLK                          | 1525.83 | 1525.85 | -0.02 | -13.45  | 8.E-28 |
| P19338 | EVFEDAAEIRLVSK                            | 1605.76 | 1604.84 | 0.92  | 570.73  | 8.E-28 |
| P19338 | EVFEDAAEIRLVSK                            | 1604.84 | 1604.84 | 0.00  | 0.84    | 8.E-28 |
| P04083 | AAYLQETGKPLDETLK                          | 1775.94 | 1775.93 | 0.01  | 2.99    | 9.E-28 |

|        |                            |         |         |       |        |        |
|--------|----------------------------|---------|---------|-------|--------|--------|
| P62241 | ISSLLEEQFQQGK              | 1505.77 | 1505.77 | 0.00  | -0.83  | 9.E-28 |
| P62241 | ISSLLEEQFQQGK              | 1505.75 | 1505.77 | -0.02 | -15.98 | 9.E-28 |
| P84090 | IYVLLRRQAQQAGK             | 1642.96 | 1642.96 | 0.00  | 0.37   | 9.E-28 |
| P02545 | AAYEAEELGDARK              | 1292.64 | 1292.64 | 0.00  | 0.74   | 9.E-28 |
| P11021 | KSDIDEIVLVGGSTRIPK         | 1926.08 | 1926.08 | 0.00  | 0.39   | 1.E-27 |
| Q14683 | PAPFFVLDEIDAALDNTNIGK      | 2259.14 | 2259.14 | 0.00  | 1.44   | 1.E-27 |
| P62906 | FPSLLTHNENMVAK             | 1599.81 | 1599.81 | 0.00  | 0.75   | 1.E-27 |
| P23396 | KPLPDHVSIVEPKDEILPTTPISEQK | 2909.57 | 2909.57 | 0.00  | 1.02   | 1.E-27 |
| P16403 | (51)SETAPAAPAAAPPAEK       | 1519.75 | 1519.75 | 0.00  | -0.87  | 1.E-27 |
| P16403 | (51)SETAPAAPAAAPPAEK       | 1519.73 | 1519.75 | -0.02 | -16.27 | 1.E-27 |
| O60506 | DLEGENIEIVFAKPPDQK         | 2041.05 | 2041.04 | 0.01  | 2.68   | 1.E-27 |
| Q08211 | ETPFELIEALLK               | 1401.78 | 1401.78 | 0.00  | 1.93   | 1.E-27 |
| Q08211 | ETPFELIEALLK               | 1401.76 | 1401.78 | -0.02 | -11.48 | 1.E-27 |
| O60506 | DLEGENIEIVFAKPPDQK         | 2041.04 | 2041.04 | 0.00  | 0.52   | 1.E-27 |
| P13645 | ELTTEIDNNIEQISSYK          | 1995.97 | 1995.96 | 0.01  | 4.03   | 1.E-27 |

|        |                            |         |         |       |         |        |
|--------|----------------------------|---------|---------|-------|---------|--------|
| P04264 | SLNNQFASFIDK               | 1382.68 | 1382.68 | 0.00  | 1.22    | 1.E-27 |
| O60812 | VDSLLENLEK                 | 1162.69 | 1158.61 | 4.08  | 3508.76 | 1.E-27 |
| P16403 | ASGPPVSELITK               | 1197.66 | 1197.66 | 0.00  | -0.90   | 1.E-27 |
| P16403 | ASGPPVSELITK               | 1197.65 | 1197.66 | -0.01 | -12.00  | 1.E-27 |
| A6NEM2 | IPPSSAPTVLSVPAGTTIVK       | 1934.11 | 1934.11 | 0.00  | 1.77    | 1.E-27 |
| Q13185 | KVEEAEPPEEFVVEK            | 1660.82 | 1660.82 | 0.00  | 0.76    | 1.E-27 |
| P23396 | KPLPDHVSIVEPKDEILPTTPISEQK | 2914.42 | 2909.57 | 4.85  | 1663.55 | 1.E-27 |
| P62873 | (51)SELDQLRQEAEQLK         | 1727.88 | 1727.87 | 0.01  | 3.12    | 2.E-27 |
| O00148 | GLAITFVSDENDAK             | 1482.78 | 1478.73 | 4.05  | 2728.97 | 2.E-27 |
| P51991 | EDTEEYNLRDYFEK             | 1849.80 | 1849.80 | 0.00  | 1.18    | 2.E-27 |
| P26373 | STESLQANVQRLK              | 1474.80 | 1472.79 | 2.01  | 1360.80 | 2.E-27 |
| P46777 | GAVDGGLSIPHSTK             | 1337.69 | 1337.69 | 0.00  | 2.55    | 2.E-27 |
| P11021 | KVTHAVVTVPAYFNDAQRQATK     | 2443.30 | 2443.30 | 0.00  | -0.02   | 2.E-27 |
| P16403 | ASGPPVSELITK               | 1197.66 | 1197.66 | 0.00  | -0.31   | 2.E-27 |
| P16403 | ASGPPVSELITK               | 1197.64 | 1197.66 | -0.02 | -12.75  | 2.E-27 |

|        |                                |         |         |       |          |        |
|--------|--------------------------------|---------|---------|-------|----------|--------|
| P16403 | ASGPPVSELITK                   | 1195.55 | 1197.66 | -2.11 | -1767.45 | 2.E-27 |
| P38159 | LFIGGLNTETNEK                  | 1438.76 | 1434.74 | 4.02  | 2792.12  | 2.E-27 |
| P08579 | ELGSSTNALRQLQGFFFYGK           | 2212.13 | 2212.13 | 0.00  | 0.03     | 2.E-27 |
| P20073 | GFGTDEQAIVDVVANRSNDQRQK        | 2546.26 | 2546.25 | 0.01  | 2.79     | 2.E-27 |
| P18621 | GLDVDSLVIHQVQNK                | 1777.96 | 1777.96 | 0.00  | -0.10    | 2.E-27 |
| Q08211 | AENNSEVGASGYGVPPTWDRGANLK      | 2645.25 | 2645.25 | 0.00  | 1.11     | 2.E-27 |
| P07355 | AYTNFDAERDALNIETAIK            | 2154.07 | 2154.06 | 0.01  | 2.66     | 2.E-27 |
| P22626 | IDTIEIITDRQSGK                 | 1587.85 | 1587.85 | 0.00  | 1.09     | 2.E-27 |
| O43143 | VYNPRIRVESLLVTAISK             | 2057.20 | 2057.20 | 0.00  | -0.77    | 2.E-27 |
| P38159 | LFIGGLNTETNEK                  | 1434.74 | 1434.74 | 0.00  | 2.55     | 2.E-27 |
| P51991 | EDTEEYNLRDYFEK                 | 1849.80 | 1849.80 | 0.00  | 0.91     | 2.E-27 |
| Q3BDU5 | LVRSVTVVEDDEDEDGDDLLHHHHVSGSRR | 3422.62 | 3422.62 | 0.00  | 0.62     | 2.E-27 |
| Q08211 | AENNSEVGASGYGVPPTWDRGANLK      | 2645.20 | 2645.25 | -0.05 | -17.98   | 2.E-27 |
| O00148 | GLAITFVSDENDAK                 | 1479.74 | 1478.73 | 1.01  | 680.69   | 2.E-27 |
| P08758 | GLGTDEESILTLTSSRSNAQRQEISAAFK  | 3134.62 | 3134.62 | 0.00  | 0.69     | 2.E-27 |

|        |                       |         |         |       |        |        |
|--------|-----------------------|---------|---------|-------|--------|--------|
| P08670 | TVETRDGQVINETSQHHDDLE | 2422.11 | 2422.10 | 0.01  | 3.37   | 3.E-27 |
| Q14254 | TAEAQLAYELQGAREQQK    | 2033.03 | 2033.02 | 0.01  | 2.78   | 3.E-27 |
| P52597 | ITGEAFVQFASQELA EK    | 1866.95 | 1866.94 | 0.01  | 3.43   | 3.E-27 |
| P19338 | VEGTEPTAFNLFVGNLNFNK  | 2311.15 | 2311.15 | 0.00  | -0.79  | 3.E-27 |
| Q71U36 | VGINYQPPTVVPGGDLAK    | 1823.98 | 1823.98 | 0.00  | 2.52   | 3.E-27 |
| O75955 | DIHDDQDYLHSLGK        | 1654.76 | 1654.76 | 0.00  | 2.49   | 3.E-27 |
| P62701 | LTGVFAPRPSTGPHK       | 1563.85 | 1563.85 | 0.00  | 0.43   | 3.E-27 |
| P62701 | LTGVFAPRPSTGPHK       | 1563.82 | 1563.85 | -0.03 | -17.09 | 3.E-27 |
| P84090 | (51)SHTILLVQPTK       | 1277.71 | 1277.73 | -0.02 | -12.96 | 3.E-27 |
| Q9UMS4 | VAHPIRPKPPSATSIPAILK  | 2094.14 | 2092.25 | 1.89  | 903.70 | 3.E-27 |
| P16403 | ASGPPVSELITK          | 1197.66 | 1197.66 | 0.00  | -0.98  | 3.E-27 |
| P16403 | ASGPPVSELITK          | 1197.64 | 1197.66 | -0.02 | -12.67 | 3.E-27 |
| P36578 | (41)ACARPLISVYSEK     | 1534.78 | 1534.78 | 0.00  | 1.84   | 3.E-27 |
| P36578 | (41)ACARPLISVYSEK     | 1534.76 | 1534.78 | -0.02 | -15.10 | 3.E-27 |
| P05787 | YEELQSLAGK            | 1136.57 | 1136.57 | 0.00  | 1.38   | 3.E-27 |

|        |                    |         |         |       |          |        |
|--------|--------------------|---------|---------|-------|----------|--------|
| P05787 | YEELQSLAGK         | 1136.56 | 1136.57 | -0.01 | -10.59   | 3.E-27 |
| O60812 | VDSLLENLEK         | 1158.61 | 1158.61 | 0.00  | -0.34    | 4.E-27 |
| O60812 | VDSLLENLEK         | 1158.60 | 1158.61 | -0.01 | -11.91   | 4.E-27 |
| O60812 | VDSLLENLEK         | 1158.59 | 1158.61 | -0.02 | -20.28   | 4.E-27 |
| O60812 | VDSLLENLEK         | 1157.65 | 1158.61 | -0.96 | -826.92  | 4.E-27 |
| O60506 | IPRDLFEDELVPLFEK   | 1959.04 | 1959.04 | 0.00  | 1.95     | 4.E-27 |
| Q99729 | FGEVVDCTIK         | 1169.62 | 1166.56 | 3.06  | 2616.02  | 4.E-27 |
| Q99729 | FGEVVDCTIK         | 1166.56 | 1166.56 | 0.00  | 0.48     | 4.E-27 |
| Q71U36 | VGINYQPPTVVPGGDLAK | 1820.99 | 1823.98 | -2.99 | -1639.77 | 4.E-27 |
| O43390 | IPRDLYEDELVPLFEK   | 1975.03 | 1975.03 | 0.00  | 1.12     | 4.E-27 |
| Q14254 | TAEAQLAYELQGAREQQK | 2032.93 | 2033.02 | -0.09 | -44.84   | 4.E-27 |
| P62873 | (51)SELDQLRQEAQLK  | 1727.88 | 1727.87 | 0.01  | 3.53     | 4.E-27 |
| P35659 | VYENYPTYDLTERK     | 1789.86 | 1789.85 | 0.01  | 3.26     | 4.E-27 |
| P04083 | QAWFIENEEQEYVQTVK  | 2140.02 | 2140.01 | 0.01  | 3.33     | 4.E-27 |
| P02545 | AA YEAE LGDARK     | 1292.64 | 1292.64 | 0.00  | 2.75     | 4.E-27 |

|        |                      |         |         |       |         |        |
|--------|----------------------|---------|---------|-------|---------|--------|
| P02545 | AA YEAE LGDARK       | 1292.63 | 1292.64 | -0.01 | -11.48  | 4.E-27 |
| P04083 | DITSDTSGDFRNALLSLAK  | 2023.02 | 2023.02 | 0.00  | 2.34    | 4.E-27 |
| P16403 | ASGPPVSELITK         | 1197.66 | 1197.66 | 0.00  | 0.44    | 5.E-27 |
| P84090 | (51)SHTILLVQPTK      | 1279.71 | 1277.73 | 1.98  | 1544.21 | 5.E-27 |
| P84090 | (51)SHTILLVQPTK      | 1277.73 | 1277.73 | 0.00  | -0.12   | 5.E-27 |
| Q96GQ7 | ALQEFDLALRGK         | 1359.75 | 1359.75 | 0.00  | 1.09    | 5.E-27 |
| Q04695 | VRALEEANTELEVK       | 1603.80 | 1599.85 | 3.95  | 2464.36 | 5.E-27 |
| Q9UMS4 | VAHPIRPKPPSATSIPAILK | 2092.25 | 2092.25 | 0.00  | 1.33    | 5.E-27 |
| P49736 | VAVGELTDEDVK         | 1273.64 | 1273.64 | 0.00  | 1.39    | 5.E-27 |
| P62906 | VSRDTLYEAVREVLHGNQRK | 2369.26 | 2369.26 | 0.00  | 0.44    | 5.E-27 |
| P07355 | SLYYYIQQDTK          | 1420.69 | 1420.69 | 0.00  | 3.07    | 5.E-27 |
| P36578 | APIRPDIVNFVHTNLRK    | 1989.14 | 1989.13 | 0.01  | 2.58    | 5.E-27 |
| Q13435 | PLYGDVFGTNAAEFQTK    | 1856.90 | 1856.89 | 0.01  | 2.72    | 5.E-27 |
| P52597 | ITGEAFVQFASQELAEK    | 1866.94 | 1866.94 | 0.00  | 2.30    | 5.E-27 |
| P07355 | SALSGHLETVILGLLK     | 1649.97 | 1649.97 | 0.00  | -0.58   | 6.E-27 |

|        |                         |         |         |       |          |        |
|--------|-------------------------|---------|---------|-------|----------|--------|
| Q04695 | VRALEEANTELEVK          | 1599.85 | 1599.85 | 0.00  | 1.58     | 6.E-27 |
| Q04695 | VRALEEANTELEVK          | 1599.82 | 1599.85 | -0.03 | -15.79   | 6.E-27 |
| P26373 | STESLQANVQRLK           | 1474.80 | 1472.79 | 2.01  | 1360.86  | 6.E-27 |
| P62906 | KYDAFLASESLIK           | 1483.79 | 1483.79 | 0.00  | -0.21    | 6.E-27 |
| P62906 | KYDAFLASESLIK           | 1483.77 | 1483.79 | -0.02 | -15.78   | 6.E-27 |
| P09651 | GGNFGRRSSGPYGGGGQYFAK   | 2019.92 | 2019.92 | 0.00  | 0.30     | 6.E-27 |
| P62241 | ISSLLEEQFQQGK           | 1505.77 | 1505.77 | 0.00  | 0.49     | 6.E-27 |
| P16403 | ASGPPVSELITK            | 1197.65 | 1197.66 | -0.01 | -11.84   | 6.E-27 |
| P11142 | SINPDEAVAYGAAVQAAILSGDK | 2259.14 | 2259.14 | 0.00  | 0.16     | 6.E-27 |
| Q99729 | FGEVVDCTIK              | 1169.62 | 1166.56 | 3.06  | 2616.70  | 6.E-27 |
| Q99729 | FGEVVDCTIK              | 1166.56 | 1166.56 | 0.00  | 0.40     | 6.E-27 |
| Q99729 | FGEVVDCTIK              | 1166.55 | 1166.56 | -0.01 | -12.55   | 6.E-27 |
| P16403 | ASGPPVSELITK            | 1199.65 | 1197.66 | 1.99  | 1661.58  | 7.E-27 |
| P16403 | ASGPPVSELITK            | 1195.55 | 1197.66 | -2.11 | -1767.29 | 7.E-27 |
| P35659 | NVGQFSGFPFEK            | 1352.78 | 1355.65 | -2.87 | -2122.87 | 7.E-27 |



|        |                            |         |         |       |          |        |
|--------|----------------------------|---------|---------|-------|----------|--------|
| P08670 | ILLAELEQLK                 | 1169.67 | 1168.71 | 0.96  | 822.29   | 7.E-27 |
| P08670 | ILLAELEQLK                 | 1168.71 | 1168.71 | 0.00  | 2.31     | 7.E-27 |
| O75955 | LPQVAEEISGPLTSANK          | 1752.93 | 1752.93 | 0.00  | 2.77     | 7.E-27 |
| O75955 | LPQVAEEISGPLTSANK          | 1751.04 | 1752.93 | -1.89 | -1078.76 | 7.E-27 |
| P07355 | SALSGHLETVILGLLK           | 1650.95 | 1649.97 | 0.98  | 591.26   | 7.E-27 |
| Q9Y3B9 | (41)AAAAPDSRVSEENLK        | 1727.83 | 1727.83 | 0.00  | 0.75     | 7.E-27 |
| P11142 | DAGTIAGLNVLRINEPTAAAIYGLDK | 2839.54 | 2839.54 | 0.00  | -0.38    | 7.E-27 |
| P11142 | DAGTIAGLNVLRINEPTAAAIYGLDK | 2837.42 | 2839.54 | -2.12 | -748.03  | 7.E-27 |
| P02545 | RQNGDDPLLTYRFPPK           | 1916.97 | 1915.99 | 0.98  | 513.56   | 8.E-27 |
| P16403 | ASGPPVSELITK               | 1197.66 | 1197.66 | 0.00  | -0.73    | 8.E-27 |
| Q9NPA8 | GLEHVTVDLVAEITPK           | 1834.97 | 1834.97 | 0.00  | 1.26     | 9.E-27 |
| P05787 | LSELEAALQRAK               | 1328.83 | 1327.75 | 1.08  | 811.37   | 9.E-27 |
| Q53F64 | IFVGGLNPEATEEK             | 1502.76 | 1502.76 | 0.00  | 2.24     | 9.E-27 |
| P35659 | NVGQFSGFPFEK               | 1355.65 | 1355.65 | 0.00  | 2.53     | 9.E-27 |
| P62906 | KYDAFLASESLIK              | 1483.79 | 1483.79 | 0.00  | -0.21    | 1.E-26 |

|        |                                |         |         |       |          |        |
|--------|--------------------------------|---------|---------|-------|----------|--------|
| P02545 | EGDLIAAQARLK                   | 1284.71 | 1283.72 | 0.99  | 766.94   | 1.E-26 |
| P02545 | EGDLIAAQARLK                   | 1283.72 | 1283.72 | 0.00  | -0.40    | 1.E-26 |
| P33992 | IPGIIAASAVRAK                  | 1378.87 | 1378.87 | 0.00  | -0.49    | 1.E-26 |
| O43172 | APDDLVPVVK                     | 1122.63 | 1122.63 | 0.00  | 2.11     | 1.E-26 |
| P04083 | GLGTDEDTLIEILASRTNK            | 2045.06 | 2045.06 | 0.00  | 1.50     | 1.E-26 |
| P22626 | IDTIEIITDRQSGK                 | 1587.85 | 1587.85 | 0.00  | 0.52     | 1.E-26 |
| P19338 | EVFEDAAEIRLVSK                 | 1604.84 | 1604.84 | 0.00  | 0.22     | 1.E-26 |
| O75367 | GKLEAIITPPPAK                  | 1336.81 | 1333.80 | 3.01  | 2253.13  | 1.E-26 |
| P16403 | ASGPPVSELITK                   | 1192.67 | 1197.66 | -4.99 | -4185.64 | 1.E-26 |
| Q13509 | MSSTFIGNSTAIQELFK              | 1876.86 | 1872.93 | 3.93  | 2095.07  | 1.E-26 |
| O00148 | LTLHGLQYYVK                    | 1463.70 | 1461.80 | 1.90  | 1298.23  | 1.E-26 |
| P05787 | LSELEAALQRAK                   | 1327.75 | 1327.75 | 0.00  | 1.03     | 1.E-26 |
| P08107 | DAGVIAGLNVLRIINEPTAAAIYGLDRTGK | 3151.73 | 3151.74 | -0.01 | -1.77    | 1.E-26 |
| Q15393 | LGAVFNQVAFPLQYTPRK             | 2048.12 | 2048.12 | 0.00  | 1.86     | 1.E-26 |
| P23396 | KPLPDHVSIVEPK                  | 1457.82 | 1457.82 | 0.00  | 1.73     | 1.E-26 |

|        |                              |         |         |       |          |        |
|--------|------------------------------|---------|---------|-------|----------|--------|
| Q9UKV3 | AAPCIYWLPLTDSQIVQK           | 2102.09 | 2102.09 | 0.00  | 1.18     | 1.E-26 |
| P16403 | ASGPPVSELITK                 | 1197.66 | 1197.66 | 0.00  | -0.90    | 2.E-26 |
| P16403 | ASGPPVSELITK                 | 1197.64 | 1197.66 | -0.02 | -12.92   | 2.E-26 |
| Q9BUV3 | ATGATQQDANASSLLDIYSFWLNRSK   | 2927.45 | 2927.44 | 0.01  | 2.28     | 2.E-26 |
| O75367 | GKLEAIITPPPAK                | 1334.76 | 1333.80 | 0.96  | 718.71   | 2.E-26 |
| O75367 | GKLEAIITPPPAK                | 1332.64 | 1333.80 | -1.16 | -874.13  | 2.E-26 |
| P02545 | RTLEGELHDLRGQVAK             | 1825.07 | 1820.99 | 4.08  | 2236.11  | 2.E-26 |
| Q53F64 | IFVGGLNPEATEEK               | 1500.68 | 1502.76 | -2.08 | -1386.19 | 2.E-26 |
| P19338 | EVFEDAAEIRLVSK               | 1604.84 | 1604.84 | 0.00  | 0.35     | 2.E-26 |
| Q13509 | MSSTFIGNSTAIQELFK            | 1876.86 | 1872.93 | 3.93  | 2094.97  | 2.E-26 |
| O14979 | VFVGGLSPDTSEEQIK             | 1704.86 | 1704.86 | 0.00  | 2.82     | 2.E-26 |
| P07355 | GRRAEDGSVIDYELIDQDARDLYDAGVK | 3138.52 | 3138.52 | 0.00  | 1.27     | 2.E-26 |
| P09661 | NAIANASTLAEVERLK             | 1698.93 | 1698.93 | 0.00  | 0.87     | 2.E-26 |
| O75367 | GKLEAIITPPPAK                | 1333.80 | 1333.80 | 0.00  | 0.38     | 2.E-26 |
| Q02878 | AIPQLQGYLRVSVFALTNGIYPHK     | 2585.41 | 2585.41 | 0.00  | 1.13     | 3.E-26 |

|        |                               |         |         |       |         |        |
|--------|-------------------------------|---------|---------|-------|---------|--------|
| O00148 | LTLHGLQQYYVK                  | 1461.80 | 1461.80 | 0.00  | 2.54    | 3.E-26 |
| P05787 | YEELQSLAGK                    | 1138.09 | 1136.57 | 1.52  | 1332.38 | 3.E-26 |
| O43172 | APDDLVPVVK                    | 1127.53 | 1122.63 | 4.90  | 4344.61 | 3.E-26 |
| P02545 | EGDLIAAQARLK                  | 1283.72 | 1283.72 | 0.00  | 0.92    | 3.E-26 |
| P02545 | EGDLIAAQARLK                  | 1282.76 | 1283.72 | -0.96 | -746.37 | 3.E-26 |
| Q99729 | MFVGGLSWDTSK                  | 1328.65 | 1326.63 | 2.02  | 1523.19 | 3.E-26 |
| P63261 | (44)EEEIAALVIDNGSGMCK         | 1883.00 | 1876.85 | 6.15  | 3267.18 | 3.E-26 |
| P63261 | (44)EEEIAALVIDNGSGMCK         | 1877.86 | 1876.85 | 1.01  | 537.86  | 3.E-26 |
| O14979 | VFVGGLSPDTSEEQIK              | 1704.86 | 1704.86 | 0.00  | 2.88    | 3.E-26 |
| O14979 | VFVGGLSPDTSEEQIK              | 1704.83 | 1704.86 | -0.03 | -17.24  | 3.E-26 |
| P08758 | (41)AQVLRGTVTDFPGFDERADAETLRK | 2833.45 | 2833.44 | 0.01  | 2.42    | 3.E-26 |
| P04083 | GLGTDEDTLIEILASRTNK           | 2045.06 | 2045.06 | 0.00  | 0.77    | 3.E-26 |
| P14136 | LALDIEIATYRK                  | 1404.80 | 1404.80 | 0.00  | 1.47    | 3.E-26 |
| P84090 | (51)SHTILLVQPTK               | 1277.71 | 1277.73 | -0.02 | -13.50  | 4.E-26 |
| P20700 | AEHDQLLLNYAK                  | 1417.70 | 1413.73 | 3.97  | 2800.11 | 4.E-26 |

|        |                                    |         |         |       |          |        |
|--------|------------------------------------|---------|---------|-------|----------|--------|
| P02545 | RTLEGELHDLRGQVAK                   | 1820.99 | 1820.99 | 0.00  | -0.19    | 4.E-26 |
| P02545 | RTLEGELHDLRGQVAK                   | 1819.04 | 1820.99 | -1.95 | -1074.34 | 4.E-26 |
| Q9Y4Y9 | (41)AANATTNPSQLLPLELVDK            | 2036.08 | 2036.08 | 0.00  | 1.87     | 4.E-26 |
| O00148 | (41)AEQDVENDLLDYDEEEEPQAPQESTPAPPK | 3424.51 | 3424.50 | 0.01  | 2.98     | 4.E-26 |
| P62906 | KYDAFLASESLIK                      | 1483.79 | 1483.79 | 0.00  | 0.06     | 4.E-26 |
| P62906 | KYDAFLASESLIK                      | 1483.77 | 1483.79 | -0.02 | -15.51   | 4.E-26 |
| Q53F64 | IFVGGLNPEATEEK                     | 1498.80 | 1502.76 | -3.96 | -2639.99 | 4.E-26 |
| P11021 | PYIQVDIGGGQTK                      | 1374.71 | 1374.71 | 0.00  | 0.21     | 4.E-26 |
| P05787 | YEELQSLAGK                         | 1136.57 | 1136.57 | 0.00  | 1.82     | 4.E-26 |
| Q9NWH9 | (41)AAATGAVAASAASGQAEKG            | 1632.81 | 1629.80 | 3.01  | 1845.46  | 4.E-26 |
| Q9UQE7 | IRELGSLPQEAFEK                     | 1619.73 | 1615.86 | 3.87  | 2392.16  | 5.E-26 |
| Q9UQE7 | IRELGSLPQEAFEK                     | 1615.86 | 1615.86 | 0.00  | 1.40     | 5.E-26 |
| P22626 | IDTIEIITDRQSGK                     | 1587.85 | 1587.85 | 0.00  | 3.04     | 5.E-26 |
| P22626 | RGFGFVTFDDHDPVDK                   | 1850.86 | 1850.86 | 0.00  | -0.17    | 5.E-26 |
| P22626 | RGFGFVTFDDHDPVDK                   | 1850.83 | 1850.86 | -0.03 | -13.62   | 5.E-26 |

|        |                    |         |         |       |          |        |
|--------|--------------------|---------|---------|-------|----------|--------|
| P61978 | IILDLISESPIK       | 1339.80 | 1339.80 | 0.00  | -0.03    | 5.E-26 |
| P61978 | IILDLISESPIK       | 1339.78 | 1339.80 | -0.02 | -12.34   | 5.E-26 |
| P84090 | (51)SHTILLVQPTK    | 1277.73 | 1277.73 | 0.00  | 0.58     | 5.E-26 |
| Q13509 | MSSTFIGNSTAIQELFK  | 1872.94 | 1872.93 | 0.01  | 3.13     | 5.E-26 |
| P62805 | VFLENVIRDAVTYTEHAK | 2104.10 | 2104.10 | 0.00  | -0.22    | 5.E-26 |
| P61247 | VERADGYEPPVQESV    | 1673.79 | 1673.79 | 0.00  | -1.04    | 5.E-26 |
| P62081 | AQLRELNITAAK       | 1326.76 | 1326.76 | 0.00  | 0.36     | 5.E-26 |
| P20700 | AEHDQLLLNYAK       | 1413.73 | 1413.73 | 0.00  | 2.76     | 5.E-26 |
| P20700 | AEHDQLLLNYAK       | 1411.24 | 1413.73 | -2.49 | -1763.56 | 5.E-26 |
| Q969G3 | IAAEIAQAEQARK      | 1526.85 | 1526.81 | 0.04  | 25.85    | 6.E-26 |
| Q969G3 | IAAEIAQAEQARK      | 1526.81 | 1526.81 | 0.00  | 2.53     | 6.E-26 |
| Q9UKM9 | SINSRVFIGNLNTALVK  | 1845.05 | 1845.05 | 0.00  | 0.05     | 6.E-26 |
| Q09028 | TPSSDVLVFDYTK      | 1470.72 | 1470.72 | 0.00  | 2.51     | 6.E-26 |
| P07355 | SALSGHLETVILGLLK   | 1649.97 | 1649.97 | 0.00  | 0.20     | 6.E-26 |
| P61978 | IILDLISESPIK       | 1336.73 | 1339.80 | -3.07 | -2293.76 | 6.E-26 |

|        |                         |         |         |       |          |        |
|--------|-------------------------|---------|---------|-------|----------|--------|
| Q9NWH9 | (41)AAATGAVAASAASGQAEKG | 1630.81 | 1629.80 | 1.01  | 618.52   | 6.E-26 |
| Q969G3 | IAAEIAQAEEQARK          | 1526.76 | 1526.81 | -0.05 | -35.20   | 7.E-26 |
| Q99729 | MFVGGLSWDTSK            | 1326.63 | 1326.63 | 0.00  | 0.30     | 7.E-26 |
| Q14103 | IFVGGLSPDTPEEK          | 1488.83 | 1487.75 | 1.08  | 728.46   | 7.E-26 |
| Q14103 | IFVGGLSPDTPEEK          | 1487.75 | 1487.75 | 0.00  | 1.86     | 7.E-26 |
| Q14103 | IFVGGLSPDTPEEK          | 1487.73 | 1487.75 | -0.02 | -15.42   | 7.E-26 |
| Q14103 | IFVGGLSPDTPEEK          | 1483.80 | 1487.75 | -3.95 | -2659.67 | 7.E-26 |
| Q9NWB6 | LIEEETARRVEELVAK        | 1884.03 | 1884.03 | 0.00  | -0.21    | 7.E-26 |
| P36578 | AFRNIPGITLLNVSK         | 1641.96 | 1641.96 | 0.00  | 2.80     | 8.E-26 |
| Q969G3 | IAAEIAQAEEQARK          | 1524.73 | 1526.81 | -2.08 | -1364.73 | 8.E-26 |
| Q969G3 | IAAEIAQAEEQARK          | 1522.81 | 1526.81 | -4.00 | -2627.28 | 8.E-26 |
| O75955 | DIHDDQDYLSLGLK          | 1654.76 | 1654.76 | 0.00  | 2.43     | 8.E-26 |
| Q13435 | RAAVLLEQERQEQIAK        | 1881.05 | 1881.04 | 0.01  | 2.99     | 8.E-26 |
| Q13509 | MSSTFIGNSTAIQELFK       | 1872.94 | 1872.93 | 0.01  | 2.70     | 8.E-26 |
| P07355 | SALSGHLETVILGLLK        | 1649.97 | 1649.97 | 0.00  | 1.42     | 8.E-26 |

|        |                    |         |         |       |          |        |
|--------|--------------------|---------|---------|-------|----------|--------|
| P07355 | SALSGHLETVILGLLK   | 1659.85 | 1649.97 | 9.88  | 5952.66  | 8.E-26 |
| P20700 | AEHDQLLLNYAK       | 1417.70 | 1413.73 | 3.97  | 2800.39  | 8.E-26 |
| P20700 | AEHDQLLLNYAK       | 1413.75 | 1413.73 | 0.02  | 16.19    | 8.E-26 |
| P20700 | AEHDQLLLNYAK       | 1413.73 | 1413.73 | 0.00  | 2.76     | 8.E-26 |
| P11021 | LYGSAGPPPTGEEDTAEK | 1817.83 | 1817.83 | 0.00  | 0.72     | 9.E-26 |
| P11021 | LYGSAGPPPTGEEDTAEK | 1815.95 | 1817.83 | -1.88 | -1034.55 | 9.E-26 |
| P02545 | RQNGDDPLLTYRFPPK   | 1916.98 | 1915.99 | 0.99  | 514.55   | 9.E-26 |
| Q09161 | IEVQVQTLHLAAK      | 1580.93 | 1580.93 | 0.00  | -0.81    | 9.E-26 |
| P08670 | ILLAELEQLK         | 1168.71 | 1168.71 | 0.00  | 1.54     | 9.E-26 |
| P08670 | ILLAELEQLK         | 1168.70 | 1168.71 | -0.01 | -11.46   | 9.E-26 |
| P08107 | AQIHDLVLVGGSTRIPK  | 1804.05 | 1803.04 | 1.01  | 557.68   | 9.E-26 |
| P07305 | YSDMIVAAIQAEK      | 1446.75 | 1437.72 | 9.03  | 6243.27  | 9.E-26 |
| P07305 | YSDMIVAAIQAEK      | 1444.75 | 1437.72 | 7.03  | 4862.77  | 9.E-26 |
| P09661 | NAIANASTLAEVERLK   | 1698.93 | 1698.93 | 0.00  | 0.46     | 1.E-25 |
| P19338 | FGYVDFESAEDLEK     | 1649.81 | 1647.73 | 2.08  | 1260.81  | 1.E-25 |



|        |                                    |         |         |       |          |        |
|--------|------------------------------------|---------|---------|-------|----------|--------|
| P19338 | FGYVDFESAEDLEK                     | 1647.73 | 1647.73 | 0.00  | 0.67     | 1.E-25 |
| P19338 | VEGTEPTTAFNLFVGNLNFNK              | 2311.15 | 2311.15 | 0.00  | -0.79    | 1.E-25 |
| P62906 | KYDAFLASESLIK                      | 1487.90 | 1483.79 | 4.11  | 2762.47  | 1.E-25 |
| Q9UKV3 | ISNIVHISNLVRPFTLGQLK               | 2248.31 | 2248.31 | 0.00  | -1.22    | 1.E-25 |
| Q9UKV3 | ISNIVHISNLVRPFTLGQLK               | 2244.17 | 2248.31 | -4.14 | -1844.53 | 1.E-25 |
| P17676 | VLELTAENERLQK                      | 1542.82 | 1541.84 | 0.98  | 634.10   | 1.E-25 |
| P17676 | VLELTAENERLQK                      | 1541.85 | 1541.84 | 0.01  | 3.31     | 1.E-25 |
| Q96GM8 | TANFVAVDTELSGLGDRK                 | 1891.97 | 1891.96 | 0.01  | 3.00     | 1.E-25 |
| Q13151 | RGFGFVYFQNHDAADK                   | 1881.00 | 1870.88 | 10.12 | 5380.64  | 1.E-25 |
| Q9NZB2 | PVAPQVPSGGAPGQGPYPYSLSEPAPLTLDTSGK | 3431.73 | 3431.72 | 0.01  | 2.35     | 1.E-25 |
| P62906 | FPSLLTHNENMVAK                     | 1604.74 | 1599.81 | 4.93  | 3071.72  | 1.E-25 |
| O00571 | RSFLDLLNATGK                       | 1446.82 | 1446.82 | 0.00  | -0.99    | 1.E-25 |
| P07355 | AYTNFDAERDALNIETAIK                | 2154.06 | 2154.06 | 0.00  | 2.24     | 1.E-25 |
| Q14254 | VDEIVVLSGDNSK                      | 1373.70 | 1373.70 | 0.00  | 2.41     | 1.E-25 |
| P84090 | (51)SHTILLVQPTK                    | 1277.71 | 1277.73 | -0.02 | -12.80   | 1.E-25 |

|        |                        |         |         |       |          |        |
|--------|------------------------|---------|---------|-------|----------|--------|
| O43390 | DYAFVHFEDRGAAVK        | 1723.83 | 1723.83 | 0.00  | 0.54     | 1.E-25 |
| P08670 | TVETRDGQVINETSQHHDDLE  | 2422.11 | 2422.10 | 0.01  | 3.20     | 2.E-25 |
| P19338 | VEGTEPTTAFNLFVGNLNFNK  | 2311.15 | 2311.15 | 0.00  | 0.21     | 2.E-25 |
| P09661 | NAIANASTLAEVERLK       | 1696.80 | 1698.93 | -2.13 | -1254.84 | 2.E-25 |
| P62424 | VPPAINQFTQALDRQTATQLLK | 2452.34 | 2452.34 | 0.00  | 0.54     | 2.E-25 |
| P62906 | KYDAFLASESLIK          | 1483.79 | 1483.79 | 0.00  | 0.87     | 2.E-25 |
| P26447 | ELLTRELPSFLGK          | 1502.83 | 1501.85 | 0.98  | 650.84   | 2.E-25 |
| P84090 | (51)SHTILLVQPTK        | 1277.73 | 1277.73 | 0.00  | -0.04    | 2.E-25 |
| P46781 | IEDFLERRLQTQVFK        | 1921.04 | 1921.04 | 0.00  | 1.09     | 2.E-25 |
| P14136 | LALDIEIATYRK           | 1404.80 | 1404.80 | 0.00  | 2.11     | 2.E-25 |
| Q99848 | PGLNVVLEGPKK           | 1249.74 | 1249.74 | 0.00  | 0.57     | 2.E-25 |
| O60506 | ALLERTGYTLDVTTGQRK     | 2021.09 | 2021.09 | 0.00  | 0.38     | 2.E-25 |
| P26447 | ELLTRELPSFLGK          | 1501.85 | 1501.85 | 0.00  | -1.06    | 2.E-25 |
| P09651 | GGNFGGRSSGPYGGGGQYFAK  | 2020.93 | 2019.92 | 1.01  | 498.73   | 2.E-25 |
| P62241 | ISSLLEEQFQQGK          | 1505.77 | 1505.77 | 0.00  | 0.56     | 2.E-25 |

|        |                       |         |         |       |         |        |
|--------|-----------------------|---------|---------|-------|---------|--------|
| O00148 | LTLHGLQQYYVK          | 1463.70 | 1461.80 | 1.90  | 1299.93 | 2.E-25 |
| P39023 | FSAPRHGSLGFLPRK       | 1668.92 | 1668.92 | 0.00  | 1.79    | 3.E-25 |
| P16403 | ASGPPVSELITK          | 1197.66 | 1197.66 | 0.00  | -0.90   | 3.E-25 |
| P16403 | ASGPPVSELITK          | 1197.65 | 1197.66 | -0.01 | -12.00  | 3.E-25 |
| Q9UKX7 | GLVVPSSGGGRFSGFGSAGGK | 1849.95 | 1849.94 | 0.01  | 3.17    | 3.E-25 |
| Q9UKX7 | GLVVPSSGGGRFSGFGSAGGK | 1848.90 | 1849.94 | -1.04 | -564.68 | 3.E-25 |
| O60506 | ALLERTGYTLDVTTGQRK    | 2025.07 | 2021.09 | 3.98  | 1967.72 | 3.E-25 |
| P35659 | LCEIERIHFFLSK         | 1690.89 | 1690.89 | 0.00  | 1.08    | 3.E-25 |
| Q9UHX1 | FGAVNRVIYQEK          | 1535.85 | 1535.85 | 0.00  | 2.87    | 3.E-25 |
| P02545 | RTLEGELHDLRGQVAK      | 1825.07 | 1820.99 | 4.08  | 2235.01 | 3.E-25 |
| P02545 | RTLEGELHDLRGQVAK      | 1820.99 | 1820.99 | 0.00  | 0.02    | 3.E-25 |
| O00148 | LTLHGLQQYYVK          | 1462.71 | 1461.80 | 0.91  | 625.36  | 3.E-25 |
| P02545 | LALDMEIHAYRK          | 1458.77 | 1458.77 | 0.00  | -1.16   | 3.E-25 |
| P62906 | FPSLLTHNENMVAK        | 1599.81 | 1599.81 | 0.00  | 0.88    | 3.E-25 |
| Q6I9Y2 | (46)GAVTDDEVIRK       | 1243.64 | 1243.64 | 0.00  | 1.26    | 3.E-25 |

|        |                                |         |         |       |          |        |
|--------|--------------------------------|---------|---------|-------|----------|--------|
| Q6I9Y2 | (46)GAVTDDEVIRK                | 1241.73 | 1243.64 | -1.91 | -1539.17 | 3.E-25 |
| Q6I9Y2 | (46)GAVTDDEVIRK                | 1240.68 | 1243.64 | -2.96 | -2387.19 | 3.E-25 |
| O60506 | DLEGENIEIVFAKPPDQK             | 2041.04 | 2041.04 | 0.00  | 0.62     | 4.E-25 |
| Q9NY12 | VPYFNAPVYLENK                  | 1552.79 | 1552.79 | 0.00  | 0.61     | 4.E-25 |
| P05388 | ISRGTIEILSDVQLIK               | 1784.04 | 1784.04 | 0.00  | 1.22     | 4.E-25 |
| Q9Y5S9 | GYTLVEYETYK                    | 1364.65 | 1364.65 | 0.00  | 0.60     | 4.E-25 |
| Q9Y5S9 | GYTLVEYETYK                    | 1364.63 | 1364.65 | -0.02 | -14.21   | 4.E-25 |
| Q9BTD8 | (41)AGAGPAPGLPGAGGPVVPGPAGIPGK | 2217.20 | 2217.19 | 0.01  | 4.09     | 4.E-25 |
| Q92841 | APILIATDVASRGLDVEDVK           | 2081.14 | 2081.14 | 0.00  | 0.68     | 4.E-25 |
| Q99729 | MFVGGLSWDTSK                   | 1328.65 | 1326.63 | 2.02  | 1523.19  | 4.E-25 |
| Q99729 | MFVGGLSWDTSK                   | 1326.63 | 1326.63 | 0.00  | 0.60     | 4.E-25 |
| Q8NC51 | VEFNIRKPNEGADGQWK              | 1991.90 | 1986.99 | 4.91  | 2463.81  | 4.E-25 |
| Q8NC51 | VEFNIRKPNEGADGQWK              | 1986.99 | 1986.99 | 0.00  | 2.35     | 4.E-25 |
| O00148 | LTLHGLQQYYVK                   | 1461.80 | 1461.80 | 0.00  | 1.86     | 4.E-25 |
| P02545 | RTLEGELHDLRGQVAK               | 1819.04 | 1820.99 | -1.95 | -1074.17 | 4.E-25 |

|        |                                 |         |         |         |            |        |
|--------|---------------------------------|---------|---------|---------|------------|--------|
| P62701 | VNDTIQIDLETGK                   | 1445.74 | 1444.74 | 1.00    | 694.86     | 5.E-25 |
| P62701 | VNDTIQIDLETGK                   | 1444.88 | 1444.74 | 0.14    | 97.92      | 5.E-25 |
| P26447 | ELLTRELPSFLGK                   | 1502.83 | 1501.85 | 0.98    | 651.17     | 5.E-25 |
| P26447 | ELLTRELPSFLGK                   | 1501.85 | 1501.85 | 0.00    | -1.13      | 5.E-25 |
| P05783 | GLQAQIASSGLTVEVDAPK             | 1885.00 | 1883.00 | 2.00    | 1062.40    | 5.E-25 |
| Q6I9Y2 | (46)GAVTDDEVIRK                 | 1248.61 | 1243.64 | 4.97    | 3980.63    | 5.E-25 |
| Q6I9Y2 | (46)GAVTDDEVIRK                 | 1245.65 | 1243.64 | 2.01    | 1611.26    | 5.E-25 |
| P61247 | VERADGYEPPVQESV                 | 1673.79 | 1673.79 | 0.00    | 0.09       | 5.E-25 |
| P61247 | VERADGYEPPVQESV                 | 1673.79 | 1673.79 | 0.00    | -0.09      | 5.E-25 |
| P11142 | SENVQDLLLLDVTPLSLGIETAGGVMVTLIK | 3237.78 | 3237.78 | 0.00    | -1.49      | 5.E-25 |
| O60812 | VDSLLENLEK                      | 1158.61 | 1158.61 | 0.00    | 0.00       | 5.E-25 |
| O60812 | VDSLLENLEK                      | 1158.60 | 1158.61 | -0.01   | -12.25     | 5.E-25 |
| O60812 | VDSLLENLEK                      | 1156.56 | 1158.61 | -2.05   | -1775.52   | 5.E-25 |
| Q53G20 | GTAAAAAAAAAAAAAK                | 1088.61 | 1227.66 | -139.05 | -127736.00 | 5.E-25 |
| Q53G20 | GTAAAAAAAAAAAAAK                | 1085.59 | 1227.66 | -142.07 | -130874.00 | 5.E-25 |

|        |                                    |         |         |       |         |        |
|--------|------------------------------------|---------|---------|-------|---------|--------|
| P46783 | NRIAIYELLFK                        | 1380.81 | 1378.80 | 2.01  | 1456.00 | 6.E-25 |
| P05783 | GLQAQIASSGLTVEVDAPK                | 1883.00 | 1883.00 | 0.00  | 2.57    | 6.E-25 |
| P62424 | VPPAINQFTQALDRQTATQLLK             | 2452.34 | 2452.34 | 0.00  | 0.91    | 6.E-25 |
| P22626 | IDTIEIITDRQSGK                     | 1587.85 | 1587.85 | 0.00  | 2.16    | 7.E-25 |
| P22626 | IDTIEIITDRQSGK                     | 1587.77 | 1587.85 | -0.08 | -52.32  | 7.E-25 |
| P19338 | EVFEDAAEIRLVSK                     | 1604.84 | 1604.84 | 0.00  | -0.15   | 7.E-25 |
| P11021 | KSDIDEIVLVGGSTRIPK                 | 1926.08 | 1926.08 | 0.00  | 0.91    | 7.E-25 |
| P14136 | LALDIEIATYRK                       | 1407.82 | 1404.80 | 3.02  | 2148.47 | 7.E-25 |
| P14136 | LALDIEIATYRK                       | 1404.80 | 1404.80 | 0.00  | 1.33    | 7.E-25 |
| P46778 | TGRVYNVTQHAVGIVVNK                 | 1954.07 | 1954.07 | 0.00  | 1.27    | 7.E-25 |
| P12270 | (41)AAVLQQVLERTELNK                | 1752.97 | 1752.97 | 0.00  | 1.71    | 7.E-25 |
| P11142 | SQIHDIVLVGGSTRIPK                  | 1820.99 | 1819.03 | 1.96  | 1073.62 | 7.E-25 |
| P11142 | SQIHDIVLVGGSTRIPK                  | 1819.03 | 1819.03 | 0.00  | 0.42    | 7.E-25 |
| Q32Q82 | PSSSPVIFAGGQAYTIQQQYAIQPDLTK       | 3035.55 | 3033.54 | 2.01  | 661.56  | 7.E-25 |
| Q12906 | PAVVAPAPVVEAVSTPSAAFPSDATAEQGPILTK | 3300.60 | 3287.73 | 12.87 | 3899.01 | 8.E-25 |

|        |                                |         |         |       |          |        |
|--------|--------------------------------|---------|---------|-------|----------|--------|
| P19338 | VEGTEPTTAFNLFVGNLNFNK          | 2311.15 | 2311.15 | 0.00  | -0.27    | 8.E-25 |
| P07355 | DIISDTSGDFRK                   | 1353.70 | 1352.66 | 1.04  | 767.76   | 8.E-25 |
| P22626 | IDTIEIITDRQSGK                 | 1587.85 | 1587.85 | 0.00  | 2.53     | 8.E-25 |
| P22626 | IDTIEIITDRQSGK                 | 1587.77 | 1587.85 | -0.08 | -52.45   | 8.E-25 |
| Q09161 | DGVLEEQIERLQEK                 | 1684.86 | 1684.86 | 0.00  | -0.62    | 9.E-25 |
| Q96IZ7 | EEDQATLVEQVK                   | 1387.68 | 1387.68 | 0.00  | 3.05     | 9.E-25 |
| P11021 | PYIQVDIGGGQTK                  | 1374.71 | 1374.71 | 0.00  | 0.58     | 9.E-25 |
| P05787 | YEELQSLAGK                     | 1136.56 | 1136.57 | -0.01 | -10.50   | 9.E-25 |
| Q9UMS4 | TVPEELVKPEELSK                 | 1596.86 | 1596.86 | 0.00  | 2.62     | 1.E-24 |
| Q9UMS4 | TVPEELVKPEELSK                 | 1593.77 | 1596.86 | -3.09 | -1940.57 | 1.E-24 |
| P07355 | AYTNFDAERDALNIETAIK            | 2154.06 | 2154.06 | 0.00  | 2.29     | 1.E-24 |
| P02545 | RQNGDDPLLTYRFPPK               | 1916.98 | 1915.99 | 0.99  | 514.14   | 1.E-24 |
| P19338 | EVFEDAAEIRLVSK                 | 1605.76 | 1604.84 | 0.92  | 571.54   | 1.E-24 |
| P11142 | SENVQDLLLLDVTPLSLGIETAGGVMVLIK | 3238.78 | 3237.78 | 1.00  | 308.63   | 1.E-24 |
| P62701 | LTGVFAPRPSTGPHK                | 1563.85 | 1563.85 | 0.00  | 1.58     | 1.E-24 |

|        |                                |         |         |       |          |        |
|--------|--------------------------------|---------|---------|-------|----------|--------|
| O75934 | RYELPAPSSGQK                   | 1331.68 | 1331.68 | 0.00  | 0.34     | 1.E-24 |
| P22626 | IDTIEIITDRQSGK                 | 1584.76 | 1587.85 | -3.09 | -1949.18 | 1.E-24 |
| P11021 | SDIDEIVLVGGSTRIPK              | 1798.98 | 1797.98 | 1.00  | 557.82   | 1.E-24 |
| P60709 | YPIE(317)HGIVTNWDDMEK          | 1958.05 | 1959.90 | -1.85 | -945.17  | 1.E-24 |
| P02545 | RQNGDDPLLTYRFPPK               | 1916.97 | 1915.99 | 0.98  | 513.56   | 1.E-24 |
| Q12905 | PAPDETSFSEALLK                 | 1507.78 | 1503.75 | 4.03  | 2672.18  | 1.E-24 |
| P04083 | GGPGSAVSPYPTFNPSSDVAALHK       | 2355.15 | 2355.15 | 0.00  | 0.14     | 1.E-24 |
| P19338 | EVFEDAAEIRLVSK                 | 1604.84 | 1604.84 | 0.00  | 0.35     | 1.E-24 |
| P19338 | EVFEDAAEIRLVSK                 | 1604.64 | 1604.84 | -0.20 | -126.41  | 1.E-24 |
| P08729 | LEAAIAEAEERGELALK              | 1811.97 | 1811.96 | 0.01  | 3.68     | 2.E-24 |
| Q9UMS4 | TVPEELVKPEELSK                 | 1599.85 | 1596.86 | 2.99  | 1870.10  | 2.E-24 |
| Q9NWB6 | QLLEELERQRQAELAAQK             | 2152.16 | 2152.16 | 0.00  | -0.14    | 2.E-24 |
| P34931 | VEIANDQGNRTTPSYVAFTDTERLIGDAAK | 3364.69 | 3364.69 | 0.00  | -0.91    | 2.E-24 |
| P60709 | YPIE(317)HGIVTNWDDMEK          | 1959.90 | 1959.90 | 0.00  | 1.49     | 2.E-24 |
| P60709 | YPIE(317)HGIVTNWDDMEK          | 1959.88 | 1959.90 | -0.02 | -12.24   | 2.E-24 |



|        |                               |         |         |       |          |        |
|--------|-------------------------------|---------|---------|-------|----------|--------|
| P07355 | DIISDTSGDFRK                  | 1352.78 | 1352.66 | 0.12  | 90.79    | 2.E-24 |
| P07355 | DIISDTSGDFRK                  | 1352.66 | 1352.66 | 0.00  | 2.82     | 2.E-24 |
| P22626 | IDTIEIITDRQSGK                | 1587.85 | 1587.85 | 0.00  | 3.10     | 2.E-24 |
| P22626 | IDTIEIITDRQSGK                | 1587.77 | 1587.85 | -0.08 | -51.25   | 2.E-24 |
| P05787 | LSELEAALQRAK                  | 1327.75 | 1327.75 | 0.00  | 2.84     | 2.E-24 |
| P08758 | (41)AQVLRGTVTDFPGFDERADAETLRK | 2833.44 | 2833.44 | 0.00  | 1.75     | 2.E-24 |
| O60506 | IPRDLFEDELVPLFEK              | 1959.04 | 1959.04 | 0.00  | 1.24     | 2.E-24 |
| P08670 | VESLQEEIAFLK                  | 1404.75 | 1404.75 | 0.00  | 1.56     | 2.E-24 |
| P08670 | VESLQEEIAFLK                  | 1404.73 | 1404.75 | -0.02 | -14.18   | 2.E-24 |
| Q12905 | RNQDLAPNSAEQASILSLVTK         | 2263.38 | 2254.19 | 9.19  | 4058.41  | 2.E-24 |
| P02545 | RQNGDDPLLTYRFPPK              | 1916.97 | 1915.99 | 0.98  | 513.35   | 2.E-24 |
| Q12905 | PAPDETSFSEALLK                | 1503.75 | 1503.75 | 0.00  | 2.56     | 2.E-24 |
| Q12905 | PAPDETSFSEALLK                | 1500.71 | 1503.75 | -3.04 | -2025.88 | 2.E-24 |
| P36578 | AFRNIPGITLLNVSK               | 1641.96 | 1641.96 | 0.00  | 2.80     | 2.E-24 |
| P02545 | AA YEAE LGDARK                | 1292.64 | 1292.64 | 0.00  | 0.12     | 2.E-24 |

|        |                                |         |         |       |          |        |
|--------|--------------------------------|---------|---------|-------|----------|--------|
| P05783 | KGPQVRDWSHYFK                  | 1646.83 | 1646.83 | 0.00  | 3.01     | 2.E-24 |
| P46781 | IEDFLERRLQTQVFK                | 1921.04 | 1921.04 | 0.00  | 0.77     | 2.E-24 |
| Q3BDU5 | LVRSVTVVEDDEDEDGDDLLHHHHVSGSRR | 3422.62 | 3422.62 | 0.00  | 0.24     | 2.E-24 |
| P06748 | VDNDENEHQLSLRTVSLGAGAK         | 2357.09 | 2352.17 | 4.92  | 2085.83  | 2.E-24 |
| P06748 | VDNDENEHQLSLRTVSLGAGAK         | 2352.17 | 2352.17 | 0.00  | 0.97     | 2.E-24 |
| P22626 | IDTIEIITDRQSGK                 | 1587.85 | 1587.85 | 0.00  | 2.53     | 2.E-24 |
| P22626 | IDTIEIITDRQSGK                 | 1587.77 | 1587.85 | -0.08 | -52.13   | 2.E-24 |
| Q92841 | APILIATDVASRGLDVEDVK           | 2081.14 | 2081.14 | 0.00  | 0.25     | 3.E-24 |
| Q15393 | TPVEEVPAIAPFQGRVLIGVGK         | 2347.33 | 2347.33 | 0.00  | 1.32     | 3.E-24 |
| P05787 | LSELEAALQRAK                   | 1327.75 | 1327.75 | 0.00  | 2.76     | 3.E-24 |
| P62140 | YQYGGLNSGRPVTPPRTANPPK         | 2369.22 | 2369.22 | 0.00  | 0.59     | 3.E-24 |
| Q04695 | VRALEEANTELEVK                 | 1599.85 | 1599.85 | 0.00  | 2.71     | 3.E-24 |
| P36578 | AFRNIPGITLLNVSK                | 1641.96 | 1641.96 | 0.00  | 1.77     | 3.E-24 |
| P09651 | IEVIEIMTDRGSGK                 | 1546.80 | 1546.80 | 0.00  | 2.48     | 3.E-24 |
| P08670 | VESLQEEIAFLK                   | 1401.70 | 1404.75 | -3.05 | -2179.16 | 3.E-24 |

|        |                           |         |         |       |          |        |
|--------|---------------------------|---------|---------|-------|----------|--------|
| P23396 | RFGFPEGSVELYAEK           | 1727.85 | 1727.85 | 0.00  | 1.31     | 3.E-24 |
| P62906 | KYDAFLASESLIK             | 1483.79 | 1483.79 | 0.00  | -0.14    | 3.E-24 |
| P62906 | KYDAFLASESLIK             | 1483.77 | 1483.79 | -0.02 | -15.58   | 3.E-24 |
| O75367 | GVTIASGGVLPNIHPELLAK      | 1985.13 | 1985.13 | 0.00  | -1.06    | 3.E-24 |
| P62906 | KYDAFLASESLIK             | 1483.79 | 1483.79 | 0.00  | 1.41     | 3.E-24 |
| P08670 | VESLQEEIAFLK              | 1404.75 | 1404.75 | 0.00  | 1.27     | 3.E-24 |
| P08670 | VESLQEEIAFLK              | 1404.73 | 1404.75 | -0.02 | -13.68   | 3.E-24 |
| P35908 | VRFLEQQNQVLQTK            | 1729.95 | 1729.95 | 0.00  | 0.58     | 3.E-24 |
| P07355 | AYTNFDAERDALNIETAIK       | 2154.06 | 2154.06 | 0.00  | 0.15     | 3.E-24 |
| P62701 | VNDTIQIDLETGK             | 1445.74 | 1444.74 | 1.00  | 694.51   | 3.E-24 |
| P02545 | RQNGDDPLLTYRFPPK          | 1916.98 | 1915.99 | 0.99  | 514.14   | 3.E-24 |
| O15514 | ALIPSLEGRFEDEELQQILDDIQTK | 2899.49 | 2899.48 | 0.01  | 2.03     | 3.E-24 |
| P02545 | AGQVVTIWAAGAGATHSPPTDLVWK | 2532.31 | 2532.31 | 0.00  | -0.29    | 4.E-24 |
| P20700 | VDLENRCQSLTEDLEFRK        | 2251.09 | 2251.09 | 0.00  | 0.77     | 4.E-24 |
| Q04695 | VRALEEANTELEVK            | 1596.86 | 1599.85 | -2.99 | -1869.33 | 4.E-24 |

|        |                     |         |         |       |          |        |
|--------|---------------------|---------|---------|-------|----------|--------|
| Q9Y310 | NVTDVVNTCHDAGISK    | 1732.93 | 1728.81 | 4.12  | 2376.57  | 4.E-24 |
| Q9Y310 | NVTDVVNTCHDAGISK    | 1728.92 | 1728.81 | 0.11  | 63.00    | 4.E-24 |
| Q9Y310 | NVTDVVNTCHDAGISK    | 1728.82 | 1728.81 | 0.01  | 3.31     | 4.E-24 |
| P04083 | DITSDTSGDFRNALLSLAK | 2023.02 | 2023.02 | 0.00  | 2.29     | 4.E-24 |
| P61247 | VERADGYEPPVQESV     | 1673.79 | 1673.79 | 0.00  | -0.56    | 4.E-24 |
| P06748 | NCFRMTDQEAIQDLWQWRK | 2524.40 | 2524.17 | 0.23  | 91.68    | 4.E-24 |
| P06748 | NCFRMTDQEAIQDLWQWRK | 2524.17 | 2524.17 | 0.00  | -0.46    | 4.E-24 |
| P22626 | IDTIEIITDRQSGK      | 1587.86 | 1587.85 | 0.01  | 3.42     | 5.E-24 |
| P22626 | IDTIEIITDRQSGK      | 1587.77 | 1587.85 | -0.08 | -50.56   | 5.E-24 |
| Q9UQE7 | AELGTDLLSQLSLEDQK   | 1858.96 | 1858.95 | 0.01  | 3.47     | 5.E-24 |
| P61978 | IILDLISESPIK        | 1343.74 | 1339.80 | 3.94  | 2928.91  | 5.E-24 |
| P02545 | RTLEGELHDLRGQVAK    | 1820.99 | 1820.99 | 0.00  | 0.02     | 5.E-24 |
| P02545 | RTLEGELHDLRGQVAK    | 1819.04 | 1820.99 | -1.95 | -1073.84 | 5.E-24 |
| P62701 | LTGVFAPRPSTGPHK     | 1563.85 | 1563.85 | 0.00  | 0.75     | 5.E-24 |
| Q9H307 | (41)AVAVRTLQEQLEK   | 1525.85 | 1525.85 | 0.00  | 1.30     | 5.E-24 |

|        |                        |         |         |         |            |        |
|--------|------------------------|---------|---------|---------|------------|--------|
| Q9H307 | (41)AVAVRTLQEQLK       | 1525.83 | 1525.85 | -0.02   | -15.48     | 5.E-24 |
| Q8TDN6 | FLVQNIHTLAELK          | 1524.88 | 1524.87 | 0.01    | 3.68       | 6.E-24 |
| P14384 | GQVFDQNGNPLPNVIVEVQDRK | 2466.25 | 2465.27 | 0.98    | 396.54     | 6.E-24 |
| O43143 | IIPLYSTLPPQQQRIFEPKPK  | 2688.49 | 2686.48 | 2.01    | 746.03     | 6.E-24 |
| P46783 | NRIAIYELLFK            | 1378.80 | 1378.80 | 0.00    | 0.69       | 6.E-24 |
| Q9UQE7 | IRELGSLPQEAFEK         | 1619.73 | 1615.86 | 3.87    | 2391.49    | 7.E-24 |
| Q04695 | VRALEEANTELEVK         | 1599.85 | 1599.85 | 0.00    | 3.08       | 7.E-24 |
| Q53G20 | GTAAAAAAAAAAAAAK       | 1085.59 | 1227.66 | -142.07 | -130874.00 | 7.E-24 |
| Q53G20 | GTAAAAAAAAAAAAAK       | 1085.57 | 1227.66 | -142.09 | -130887.00 | 7.E-24 |
| Q53G20 | GTAAAAAAAAAAAAAK       | 1085.56 | 1227.66 | -142.10 | -130896.00 | 7.E-24 |
| Q96DI7 | TVAVWDSSETGERVK        | 1575.79 | 1575.79 | 0.00    | -0.03      | 7.E-24 |
| P07355 | SYSPYDMLESIRK          | 1587.85 | 1587.76 | 0.09    | 57.95      | 7.E-24 |
| P07355 | SYSPYDMLESIRK          | 1587.76 | 1587.76 | 0.00    | 2.09       | 7.E-24 |
| O60506 | EFNEDGALAVLQQFK        | 1707.85 | 1707.85 | 0.00    | 0.31       | 8.E-24 |
| P61978 | IILDLISESPIK           | 1339.80 | 1339.80 | 0.00    | 1.99       | 8.E-24 |

|        |                        |         |         |       |         |        |
|--------|------------------------|---------|---------|-------|---------|--------|
| P31946 | AVTEQGHELSNEERNLLSVAYK | 2490.24 | 2486.24 | 4.00  | 1606.31 | 8.E-24 |
| Q13421 | IQSFLGGAPTEDLK         | 1474.77 | 1474.77 | 0.00  | 2.83    | 8.E-24 |
| P46783 | NRIAIYELLFK            | 1378.78 | 1378.80 | -0.02 | -13.23  | 9.E-24 |
| Q9NVP1 | QIFNVNNLNPQVALSFGFK    | 2262.22 | 2262.22 | 0.00  | -1.53   | 9.E-24 |
| P14384 | GQVFDQNGNPLPNVIVEVQDRK | 2465.28 | 2465.27 | 0.01  | 2.29    | 9.E-24 |
| Q9UQE7 | IRELGSLPQEAFEK         | 1615.86 | 1615.86 | 0.00  | 1.53    | 9.E-24 |
| P05787 | LSELEAALQRAK           | 1327.75 | 1327.75 | 0.00  | 2.01    | 1.E-23 |
| P60709 | ILTERGYSFTTTAEREIVRDIK | 2597.38 | 2597.38 | 0.00  | 1.09    | 1.E-23 |
| P11021 | SQIFSTASDNQPTVTIK      | 1835.93 | 1835.93 | 0.00  | -0.11   | 1.E-23 |
| P11021 | SQIFSTASDNQPTVTIK      | 1835.89 | 1835.93 | -0.04 | -19.72  | 1.E-23 |
| P02545 | DLEALLNSK              | 1003.62 | 1001.54 | 2.08  | 2068.22 | 1.E-23 |
| P02545 | DLEALLNSK              | 1001.53 | 1001.54 | -0.01 | -10.49  | 1.E-23 |
| P31946 | AVTEQGHELSNEERNLLSVAYK | 2489.24 | 2486.24 | 3.00  | 1204.83 | 1.E-23 |
| Q9Y3I0 | NVTDVVNTCHDAGISK       | 1732.93 | 1728.81 | 4.12  | 2375.36 | 1.E-23 |
| Q9Y3I0 | NVTDVVNTCHDAGISK       | 1728.91 | 1728.81 | 0.10  | 60.63   | 1.E-23 |

|        |                          |         |         |       |          |        |
|--------|--------------------------|---------|---------|-------|----------|--------|
| Q9Y3I0 | NVTDVVNTCHDAGISK         | 1728.81 | 1728.81 | 0.00  | 2.73     | 1.E-23 |
| Q9Y3I0 | NVTDVVNTCHDAGISK         | 1722.92 | 1728.81 | -5.89 | -3419.42 | 1.E-23 |
| P45973 | KREQSNDIARGFERGLEPEK     | 2358.20 | 2358.20 | 0.00  | 0.39     | 1.E-23 |
| Q8TDN6 | FLVQNIHTLAELK            | 1524.91 | 1524.87 | 0.04  | 24.54    | 1.E-23 |
| Q8TDN6 | FLVQNIHTLAELK            | 1524.87 | 1524.87 | 0.00  | -0.25    | 1.E-23 |
| Q15393 | ALWDRGLLNGASQK           | 1527.82 | 1527.82 | 0.00  | 0.56     | 1.E-23 |
| Q15393 | ALWDRGLLNGASQK           | 1525.85 | 1527.82 | -1.97 | -1290.13 | 1.E-23 |
| Q9NYL9 | ILPVFDEPPNPTNVEESLK      | 2137.10 | 2137.09 | 0.01  | 2.83     | 1.E-23 |
| O60506 | EFNEDGALAVLQQFK          | 1707.85 | 1707.85 | 0.00  | 0.55     | 1.E-23 |
| P05787 | LSELEAALQRAK             | 1329.76 | 1327.75 | 2.01  | 1511.90  | 1.E-23 |
| P04083 | GGPGSAVSPYPTFNPSSDVAALHK | 2355.15 | 2355.15 | 0.00  | 0.10     | 2.E-23 |
| P08729 | LEAAIAEAEERGELALK        | 1807.87 | 1811.96 | -4.09 | -2262.79 | 2.E-23 |
| P07355 | SLYYYIQDTK               | 1420.74 | 1420.69 | 0.05  | 33.05    | 2.E-23 |
| P07355 | SLYYYIQDTK               | 1420.69 | 1420.69 | 0.00  | 1.80     | 2.E-23 |
| P16403 | ASGPPVSELITK             | 1197.66 | 1197.66 | 0.00  | 0.77     | 2.E-23 |

|        |                   |         |         |       |          |        |
|--------|-------------------|---------|---------|-------|----------|--------|
| P05787 | LSELEAALQRAK      | 1327.75 | 1327.75 | 0.00  | 2.38     | 2.E-23 |
| P40429 | YQAVTATLEEK       | 1251.63 | 1251.63 | 0.00  | -0.21    | 2.E-23 |
| P40429 | YQAVTATLEEK       | 1251.62 | 1251.63 | -0.01 | -11.96   | 2.E-23 |
| Q13421 | IQSFLGGAPTEDLK    | 1478.73 | 1474.77 | 3.96  | 2679.31  | 2.E-23 |
| P02545 | DLEALLNSK         | 1001.54 | 1001.54 | 0.00  | 0.69     | 2.E-23 |
| P02545 | DLEALLNSK         | 1000.57 | 1001.54 | -0.97 | -971.05  | 2.E-23 |
| P19338 | EVFEDAAEIRLVSK    | 1605.76 | 1604.84 | 0.92  | 571.60   | 2.E-23 |
| P19338 | EVFEDAAEIRLVSK    | 1604.84 | 1604.84 | 0.00  | 1.16     | 2.E-23 |
| P08729 | LEAAIAEAEERGELALK | 1811.97 | 1811.96 | 0.01  | 3.18     | 2.E-23 |
| P08729 | LEAAIAEAEERGELALK | 1811.80 | 1811.96 | -0.16 | -88.55   | 2.E-23 |
| O75367 | GKLEAIITPPPAK     | 1337.74 | 1333.80 | 3.94  | 2946.32  | 2.E-23 |
| P02545 | RTLEGELHDLRGQVAK  | 1820.99 | 1820.99 | 0.00  | 0.46     | 2.E-23 |
| P02545 | RTLEGELHDLRGQVAK  | 1820.99 | 1820.99 | 0.00  | 0.90     | 2.E-23 |
| P02545 | RTLEGELHDLRGQVAK  | 1820.97 | 1820.99 | -0.02 | -12.50   | 2.E-23 |
| P02545 | RTLEGELHDLRGQVAK  | 1819.04 | 1820.99 | -1.95 | -1074.34 | 2.E-23 |



|        |                         |         |         |       |          |        |
|--------|-------------------------|---------|---------|-------|----------|--------|
| P02545 | RTLEGELHDLRGQVAK        | 1819.04 | 1820.99 | -1.95 | -1073.24 | 2.E-23 |
| O75533 | DLLPRLTPILK             | 1277.81 | 1277.81 | 0.00  | 2.05     | 2.E-23 |
| P02545 | RQNGDDPLLTYRFPPK        | 1916.98 | 1915.99 | 0.99  | 514.08   | 2.E-23 |
| P02545 | LALDMEIHAYRK            | 1459.77 | 1458.77 | 1.00  | 688.06   | 2.E-23 |
| P07355 | AYTNFDAERDALNIETAIK     | 2154.06 | 2154.06 | 0.00  | 1.36     | 2.E-23 |
| P07355 | AYTNFDAERDALNIETAIK     | 2149.15 | 2154.06 | -4.91 | -2283.03 | 2.E-23 |
| Q9UMS4 | EVTAAREALATLK           | 1371.77 | 1371.77 | 0.00  | 1.94     | 3.E-23 |
| P08729 | LEAAIAEAEERGELALK       | 1811.96 | 1811.96 | 0.00  | 1.47     | 3.E-23 |
| O75367 | GKLEAIITPPPAK           | 1334.76 | 1333.80 | 0.96  | 719.39   | 3.E-23 |
| O75367 | GKLEAIITPPPAK           | 1333.80 | 1333.80 | 0.00  | 0.83     | 3.E-23 |
| O75367 | GKLEAIITPPPAK           | 1332.64 | 1333.80 | -1.16 | -873.76  | 3.E-23 |
| O60506 | IPRDLFEDELVPLFEK        | 1959.04 | 1959.04 | 0.00  | 0.47     | 3.E-23 |
| P09012 | (41)AVPETRPNHTIYINNLNEK | 2263.06 | 2264.15 | -1.09 | -483.18  | 3.E-23 |
| P31946 | TAFDEAIAELDTLNNEESYK    | 2158.00 | 2158.00 | 0.00  | 1.19     | 3.E-23 |
| Q04695 | EPVTTRQVRTIVEEVQDGGK    | 2185.23 | 2183.15 | 2.08  | 949.71   | 3.E-23 |

|        |                              |         |         |       |          |        |
|--------|------------------------------|---------|---------|-------|----------|--------|
| Q04695 | EPVTTRQVRTIVEEVQDGK          | 2183.15 | 2183.15 | 0.00  | 2.16     | 3.E-23 |
| P22626 | IDTIEIITDRQSGK               | 1587.86 | 1587.85 | 0.01  | 3.61     | 3.E-23 |
| P16403 | (51)SETAPAAPAAAPPAEK         | 1519.75 | 1519.75 | 0.00  | 1.63     | 3.E-23 |
| P05783 | GLQAQIASSGLTVEVDAPK          | 1880.94 | 1883.00 | -2.06 | -1094.65 | 3.E-23 |
| Q9UMS4 | EVTAAREALATLK                | 1367.75 | 1371.77 | -4.02 | -2938.58 | 3.E-23 |
| P63104 | TAFDEAIAELDTLSEESYK          | 2130.98 | 2130.98 | 0.00  | 1.16     | 3.E-23 |
| P02545 | AGQVVTIWAAGAGATHSPPTDLVWK    | 2532.31 | 2532.31 | 0.00  | 0.06     | 3.E-23 |
| P07355 | SALSGHLETVILGLLK             | 1659.85 | 1649.97 | 9.88  | 5952.42  | 3.E-23 |
| P67809 | GAEANVTGPGGVPVQGSK           | 1694.87 | 1694.86 | 0.01  | 4.36     | 4.E-23 |
| Q8IVT2 | VRAVPTWASVQVDDPGSLASVESPGTPK | 2948.52 | 2948.52 | 0.00  | 0.41     | 4.E-23 |
| P16403 | (51)SETAPAAPAAAPPAEK         | 1520.73 | 1519.75 | 0.98  | 643.23   | 4.E-23 |
| P38919 | (41)ATTATMATSGSARK           | 1394.68 | 1394.68 | 0.00  | 2.86     | 4.E-23 |
| P62906 | QIPRILGPGLNK                 | 1308.60 | 1304.79 | 3.81  | 2908.97  | 4.E-23 |
| P62906 | QIPRILGPGLNK                 | 1304.77 | 1304.79 | -0.02 | -13.89   | 4.E-23 |
| O43390 | IPRDLYEDELVPLFEK             | 1975.04 | 1975.03 | 0.01  | 3.14     | 4.E-23 |

|        |                         |         |         |       |          |        |
|--------|-------------------------|---------|---------|-------|----------|--------|
| Q9Y310 | NVTDVVNTCHDAGISK        | 1732.93 | 1728.81 | 4.12  | 2376.57  | 4.E-23 |
| Q9Y310 | NVTDVVNTCHDAGISK        | 1728.92 | 1728.81 | 0.11  | 63.00    | 4.E-23 |
| Q9Y310 | NVTDVVNTCHDAGISK        | 1728.82 | 1728.81 | 0.01  | 3.31     | 4.E-23 |
| Q9Y310 | NVTDVVNTCHDAGISK        | 1722.92 | 1728.81 | -5.89 | -3418.78 | 4.E-23 |
| P02545 | RTLEGELHDLRGQVAK        | 1820.99 | 1820.99 | 0.00  | -0.03    | 4.E-23 |
| P02545 | RTLEGELHDLRGQVAK        | 1820.97 | 1820.99 | -0.02 | -11.89   | 4.E-23 |
| P02545 | RTLEGELHDLRGQVAK        | 1819.04 | 1820.99 | -1.95 | -1074.39 | 4.E-23 |
| O60506 | ALLERTGYTLDVTTGQRK      | 2021.09 | 2021.09 | 0.00  | 1.18     | 4.E-23 |
| P09012 | (41)AVPETRPNHTIYINNLNEK | 2264.15 | 2264.15 | 0.00  | 0.95     | 4.E-23 |
| P32969 | FLDGIYVSEK              | 1169.60 | 1169.60 | 0.00  | 0.76     | 4.E-23 |
| P32969 | FLDGIYVSEK              | 1169.59 | 1169.60 | -0.01 | -12.07   | 4.E-23 |
| P62906 | QIPRILGPGLNK            | 1304.79 | 1304.79 | 0.00  | -0.56    | 4.E-23 |
| P11142 | TVTNAVVTVPAYFNDSQRQATK  | 2409.23 | 2409.23 | 0.00  | 1.36     | 4.E-23 |
| P61247 | LMELHGEHSSSGK           | 1334.69 | 1330.62 | 4.07  | 3047.69  | 5.E-23 |
| P61247 | LMELHGEHSSSGK           | 1334.67 | 1330.62 | 4.05  | 3032.37  | 5.E-23 |

|        |                                     |         |         |       |          |        |
|--------|-------------------------------------|---------|---------|-------|----------|--------|
| Q9NX58 | VRELLEQISAFDNVPRK                   | 2013.11 | 2013.10 | 0.01  | 2.74     | 5.E-23 |
| P04083 | GVDEATIIDILTK                       | 1386.76 | 1386.76 | 0.00  | 0.67     | 5.E-23 |
| P61978 | ALRTDYNASVSPDSSGPERILSISADIETIGEILK | 3815.97 | 3815.98 | -0.01 | -2.33    | 5.E-23 |
| P02545 | AAYEAEELGDARK                       | 1292.64 | 1292.64 | 0.00  | 0.27     | 5.E-23 |
| P05783 | GLQAQIASSGLTVEVDAPK                 | 1883.01 | 1883.00 | 0.01  | 3.36     | 5.E-23 |
| P02545 | LALDMEIHAYRK                        | 1458.77 | 1458.77 | 0.00  | -1.23    | 6.E-23 |
| Q9H307 | (41)AVAVRTLQEQLK                    | 1525.85 | 1525.85 | 0.00  | 1.37     | 6.E-23 |
| Q9H307 | (41)AVAVRTLQEQLK                    | 1525.83 | 1525.85 | -0.02 | -14.36   | 6.E-23 |
| P84103 | VYVGNLGNNGNK                        | 1251.63 | 1247.63 | 4.00  | 3193.11  | 6.E-23 |
| P08729 | LEAAIAEAEERGELALK                   | 1811.97 | 1811.96 | 0.01  | 3.35     | 6.E-23 |
| P61247 | LMELHGEGLSSSGK                      | 1334.69 | 1330.62 | 4.07  | 3047.76  | 6.E-23 |
| P61247 | LMELHGEGLSSSGK                      | 1330.62 | 1330.62 | 0.00  | -0.15    | 6.E-23 |
| P34931 | VEIANDQGNRTTPSYVAFTDTERLIGDAAK      | 3364.69 | 3364.69 | 0.00  | 0.64     | 6.E-23 |
| P08729 | LEAAIAEAEERGELALK                   | 1807.87 | 1811.96 | -4.09 | -2263.07 | 7.E-23 |
| Q7L014 | IYLAIESANELAVQK                     | 1660.90 | 1660.90 | 0.00  | 0.87     | 7.E-23 |

|        |                                     |         |         |        |          |        |
|--------|-------------------------------------|---------|---------|--------|----------|--------|
| P62988 | ESTLHLVLRIRGG                       | 1449.84 | 1449.84 | 0.00   | 1.13     | 7.E-23 |
| P07355 | SLYYYIQQDTK                         | 1420.69 | 1420.69 | 0.00   | 0.67     | 7.E-23 |
| P32969 | TILSNQTVDIPENVDTLK                  | 2113.10 | 2112.13 | 0.97   | 459.52   | 8.E-23 |
| P32969 | TILSNQTVDIPENVDTLK                  | 2112.13 | 2112.13 | 0.00   | 0.76     | 8.E-23 |
| Q04695 | VRALEEANTELEVK                      | 1600.86 | 1599.85 | 1.01   | 629.75   | 8.E-23 |
| P61247 | LMELHGEGSSSGK                       | 1330.62 | 1330.62 | 0.00   | 0.45     | 8.E-23 |
| P11021 | VTHAVVTVPAYFNDAQRQATK               | 2315.20 | 2315.20 | 0.00   | 0.52     | 9.E-23 |
| P07355 | SYSPYDMLESIRK                       | 1587.85 | 1587.76 | 0.09   | 57.13    | 9.E-23 |
| P07355 | SYSPYDMLESIRK                       | 1587.76 | 1587.76 | 0.00   | 2.28     | 9.E-23 |
| O60506 | ALLERTGYTLDVTTGQRK                  | 2021.09 | 2021.09 | 0.00   | -0.75    | 9.E-23 |
| P06748 | CGSGPVHISGQHLVAVEEDAE(37)SEDEEEEDVK | 3442.41 | 3459.43 | -17.02 | -4945.15 | 1.E-22 |
| Q15029 | IAVEPVNPSELPK                       | 1391.77 | 1391.77 | 0.00   | 1.37     | 1.E-22 |
| P56182 | LQDLAGGIFPEDEIPEK                   | 1869.95 | 1869.94 | 0.01   | 2.91     | 1.E-22 |
| P56182 | LQDLAGGIFPEDEIPEK                   | 1866.81 | 1869.94 | -3.13  | -1678.62 | 1.E-22 |
| Q04695 | VRALEEANTELEVK                      | 1601.86 | 1599.85 | 2.01   | 1255.69  | 1.E-22 |

|        |                  |         |         |       |          |        |
|--------|------------------|---------|---------|-------|----------|--------|
| Q9NY12 | VPYFNAPVYLENK    | 1552.79 | 1552.79 | 0.00  | 0.61     | 1.E-22 |
| P84103 | VYVGNLGNNGNK     | 1249.60 | 1247.63 | 1.97  | 1576.88  | 1.E-22 |
| P84103 | VYVGNLGNNGNK     | 1248.61 | 1247.63 | 0.98  | 788.53   | 1.E-22 |
| P84103 | VYVGNLGNNGNK     | 1248.60 | 1247.63 | 0.97  | 775.00   | 1.E-22 |
| P84103 | VYVGNLGNNGNK     | 1247.66 | 1247.63 | 0.03  | 22.09    | 1.E-22 |
| P84103 | VYVGNLGNNGNK     | 1247.63 | 1247.63 | 0.00  | 1.01     | 1.E-22 |
| Q99848 | PGLNVVLEGPCK     | 1245.78 | 1249.74 | -3.96 | -3177.11 | 1.E-22 |
| P02545 | RQNGDDPLLTYRFPPK | 1916.97 | 1915.99 | 0.98  | 513.51   | 1.E-22 |
| P07910 | LKGDDLQAIKK      | 1227.67 | 1227.72 | -0.05 | -37.35   | 1.E-22 |
| P26368 | LFIGGLPNYLNDQVK  | 1807.87 | 1804.94 | 2.93  | 1623.06  | 1.E-22 |
| P26368 | LFIGGLPNYLNDQVK  | 1804.94 | 1804.94 | 0.00  | 2.37     | 1.E-22 |
| P02545 | AAYEAE LGDARK    | 1292.64 | 1292.64 | 0.00  | 0.82     | 1.E-22 |
| P02545 | AAYEAE LGDARK    | 1290.68 | 1292.64 | -1.96 | -1516.21 | 1.E-22 |
| P08670 | ILLAELEQLK       | 1168.71 | 1168.71 | 0.00  | 2.14     | 2.E-22 |
| P22626 | IDTIEIITDRQSGK   | 1587.85 | 1587.85 | 0.00  | 0.52     | 2.E-22 |

|        |                         |         |         |       |          |        |
|--------|-------------------------|---------|---------|-------|----------|--------|
| P18124 | RIALTDNALIARSLGK        | 1711.01 | 1711.01 | 0.00  | 1.28     | 2.E-22 |
| P02545 | RQNGDDPLLTYRFPPK        | 1916.97 | 1915.99 | 0.98  | 513.72   | 2.E-22 |
| P07910 | LKGDDLQAIKK             | 1227.72 | 1227.72 | 0.00  | 0.53     | 2.E-22 |
| P07355 | SALSGHLETVILGLLK        | 1649.97 | 1649.97 | 0.00  | 0.87     | 2.E-22 |
| P07355 | SALSGHLETVILGLLK        | 1649.94 | 1649.97 | -0.03 | -17.13   | 2.E-22 |
| P02545 | RQNGDDPLLTYRFPPK        | 1916.97 | 1915.99 | 0.98  | 513.77   | 2.E-22 |
| O60506 | VTEGLTDVILYHQPDDK       | 1942.10 | 1941.97 | 0.13  | 65.94    | 2.E-22 |
| P05787 | LEAELGNMQGLVEDFK        | 1791.88 | 1791.87 | 0.01  | 3.09     | 2.E-22 |
| Q07021 | AFVDFLSDEIK             | 1283.65 | 1282.64 | 1.01  | 783.01   | 2.E-22 |
| P20073 | GFGTDEQAIVDVVANRSNDQRQK | 2546.26 | 2546.25 | 0.01  | 2.83     | 2.E-22 |
| P61313 | YIQELWRK                | 1134.62 | 1134.62 | 0.00  | 1.53     | 2.E-22 |
| P61313 | YIQELWRK                | 1132.73 | 1134.62 | -1.89 | -1666.03 | 2.E-22 |
| Q969G3 | IAAEIAQAEEQARK          | 1526.85 | 1526.81 | 0.04  | 26.37    | 2.E-22 |
| Q969G3 | IAAEIAQAEEQARK          | 1526.81 | 1526.81 | 0.00  | 2.73     | 2.E-22 |
| Q969G3 | IAAEIAQAEEQARK          | 1526.76 | 1526.81 | -0.05 | -35.06   | 2.E-22 |

|        |                      |         |         |       |          |        |
|--------|----------------------|---------|---------|-------|----------|--------|
| Q99848 | PGLNVVLEGPCK         | 1249.74 | 1249.74 | 0.00  | 0.73     | 2.E-22 |
| Q07021 | VEEQPELTSTPNFVVEVIK  | 2286.17 | 2286.16 | 0.01  | 2.46     | 2.E-22 |
| P02545 | KEGDLIAAQARLK        | 1415.63 | 1411.81 | 3.82  | 2696.90  | 2.E-22 |
| Q15393 | LGAVFNQVAFPLQYTPRK   | 2048.12 | 2048.12 | 0.00  | 0.78     | 2.E-22 |
| Q9H307 | (41)AVAVRTLQEQLK     | 1525.85 | 1525.85 | 0.00  | 1.56     | 3.E-22 |
| Q9H307 | (41)AVAVRTLQEQLK     | 1525.82 | 1525.85 | -0.03 | -16.39   | 3.E-22 |
| P02545 | RTLEGELHDLRGQVAK     | 1825.07 | 1820.99 | 4.08  | 2235.29  | 3.E-22 |
| P05783 | IMADIRAQYDELARK      | 1791.93 | 1791.93 | 0.00  | 2.00     | 3.E-22 |
| P39023 | PVHLTAFGLGYK         | 1244.69 | 1244.69 | 0.00  | 2.80     | 3.E-22 |
| P08670 | ILLAELEQLK           | 1168.71 | 1168.71 | 0.00  | 1.80     | 3.E-22 |
| Q96IZ7 | ARLQLVLEAAAK         | 1281.78 | 1281.78 | 0.00  | 2.16     | 3.E-22 |
| Q969G3 | IAAEIAQAEQARK        | 1524.73 | 1526.81 | -2.08 | -1364.60 | 3.E-22 |
| Q969G3 | IAAEIAQAEQARK        | 1522.81 | 1526.81 | -4.00 | -2628.07 | 3.E-22 |
| Q6P1J9 | (41)ADVLSVLRQYNIQK   | 1687.93 | 1687.93 | 0.00  | 1.16     | 3.E-22 |
| Q03252 | DLESLFHRSEVELAAALSDK | 2229.13 | 2229.13 | 0.00  | -0.89    | 3.E-22 |



|        |                                  |         |         |       |          |        |
|--------|----------------------------------|---------|---------|-------|----------|--------|
| P08107 | SENVQDLLLLDVAPLSLGLLETAGGVMTALIK | 3179.73 | 3179.74 | -0.01 | -2.31    | 3.E-22 |
| P07355 | LSLEGDHSTPPSAYGSVK               | 1843.91 | 1843.90 | 0.01  | 3.38     | 3.E-22 |
| Q14683 | EQRGEPETFLPLDYLEVKPTDEK          | 2734.36 | 2732.35 | 2.01  | 735.04   | 3.E-22 |
| P02545 | KEGDLIAAQRALK                    | 1411.81 | 1411.81 | 0.00  | 0.73     | 3.E-22 |
| P02545 | KEGDLIAAQRALK                    | 1410.76 | 1411.81 | -1.05 | -744.54  | 3.E-22 |
| P08758 | GLGTDEESILTLTTSRSNAQRQEISAAFK    | 3134.62 | 3134.62 | 0.00  | -0.52    | 3.E-22 |
| P38159 | LFIGGLNTETNEK                    | 1437.75 | 1434.74 | 3.01  | 2095.27  | 3.E-22 |
| P02545 | RTLEGELHDLRGQVAK                 | 1820.99 | 1820.99 | 0.00  | 0.46     | 4.E-22 |
| P02545 | RTLEGELHDLRGQVAK                 | 1819.04 | 1820.99 | -1.95 | -1073.62 | 4.E-22 |
| Q9H307 | (41)AVAVRTLQEQLK                 | 1525.85 | 1525.85 | 0.00  | 1.89     | 4.E-22 |
| P41219 | MALDIEIATYRK                     | 1422.75 | 1422.75 | 0.00  | 1.50     | 4.E-22 |
| Q13421 | IQSFLGGAPTEDLK                   | 1478.73 | 1474.77 | 3.96  | 2679.45  | 4.E-22 |
| Q13421 | IQSFLGGAPTEDLK                   | 1474.77 | 1474.77 | 0.00  | 3.24     | 4.E-22 |
| P05787 | YEELQSLAGK                       | 1140.70 | 1136.57 | 4.13  | 3619.76  | 4.E-22 |
| P46777 | GAVDGGLSIPHSTK                   | 1337.69 | 1337.69 | 0.00  | 2.62     | 4.E-22 |

|        |                        |         |         |       |          |        |
|--------|------------------------|---------|---------|-------|----------|--------|
| P02545 | KEGDLIAAQRALK          | 1408.68 | 1411.81 | -3.13 | -2221.91 | 4.E-22 |
| Q96DI7 | IFQGNVHNFEK            | 1336.65 | 1331.66 | 4.99  | 3736.55  | 4.E-22 |
| P46783 | NRIAIYELLFK            | 1378.80 | 1378.80 | 0.00  | 0.48     | 5.E-22 |
| Q02539 | ALAAAGYDVEK            | 1107.55 | 1106.56 | 0.99  | 894.54   | 5.E-22 |
| Q02539 | ALAAAGYDVEK            | 1106.56 | 1106.56 | 0.00  | -0.32    | 5.E-22 |
| P08579 | ELGSSTNALRQLQGPFYK     | 2212.13 | 2212.13 | 0.00  | -0.06    | 5.E-22 |
| Q04695 | EPVTTRQVRTIVEEVQDGK    | 2183.16 | 2183.15 | 0.01  | 2.58     | 5.E-22 |
| P11021 | KVTHAVVTVPAYFNDAQRQATK | 2443.30 | 2443.30 | 0.00  | 0.06     | 5.E-22 |
| P02545 | RQNGDDPLLTYRFPPK       | 1916.97 | 1915.99 | 0.98  | 513.56   | 5.E-22 |
| P14384 | GQVFDQNGNPLPNVIVEVQDRK | 2467.25 | 2465.27 | 1.98  | 803.63   | 5.E-22 |
| P20700 | AEHDQLLLLNYAK          | 1417.70 | 1413.73 | 3.97  | 2799.19  | 5.E-22 |
| P20700 | AEHDQLLLLNYAK          | 1417.68 | 1413.73 | 3.95  | 2783.79  | 5.E-22 |
| P20700 | AEHDQLLLLNYAK          | 1413.73 | 1413.73 | 0.00  | 2.83     | 5.E-22 |
| Q9Y224 | NAEPLINLDVNNPDFK       | 1811.91 | 1811.91 | 0.00  | 1.08     | 6.E-22 |
| O43390 | VLVVRNLATTVTEEILEK     | 2074.17 | 2074.17 | 0.00  | -1.04    | 6.E-22 |

|        |                                 |         |         |       |          |        |
|--------|---------------------------------|---------|---------|-------|----------|--------|
| P46783 | NRIAIYELLFK                     | 1379.78 | 1378.80 | 0.98  | 713.56   | 6.E-22 |
| P61978 | IILDLISESPIK                    | 1339.80 | 1339.80 | 0.00  | 2.74     | 6.E-22 |
| P38159 | LFIGGLNTETNEK                   | 1434.74 | 1434.74 | 0.00  | 2.07     | 6.E-22 |
| P38159 | LFIGGLNTETNEK                   | 1434.72 | 1434.74 | -0.02 | -13.20   | 6.E-22 |
| O95926 | (41)AAIAASEVLVDSAEESLAAAAELAAQK | 2697.37 | 2697.37 | 0.00  | 0.10     | 6.E-22 |
| Q15029 | IAVEPVNPSELPK                   | 1388.65 | 1391.77 | -3.12 | -2248.09 | 6.E-22 |
| P20700 | AEHDQLLLNYAK                    | 1415.71 | 1413.73 | 1.98  | 1399.93  | 6.E-22 |
| P20700 | AEHDQLLLNYAK                    | 1413.73 | 1413.73 | 0.00  | 2.61     | 6.E-22 |
| Q96DI7 | IFQGNVHNF EK                    | 1331.66 | 1331.66 | 0.00  | 0.29     | 6.E-22 |
| Q96DI7 | IFQGNVHNF EK                    | 1331.64 | 1331.66 | -0.02 | -14.13   | 6.E-22 |
| P16403 | ERSGVSLAALK                     | 1132.65 | 1129.65 | 3.00  | 2649.11  | 6.E-22 |
| O75934 | RYELPAPSSGQK                    | 1331.68 | 1331.68 | 0.00  | 0.57     | 6.E-22 |
| P02545 | RQNGDDPLLTYRFPPK                | 1916.98 | 1915.99 | 0.99  | 514.08   | 6.E-22 |
| P67809 | GAEAAANTGPGGVPVQGSK             | 1694.86 | 1694.86 | 0.00  | 2.12     | 6.E-22 |
| P26373 | LILFPRKPSAPK                    | 1362.76 | 1365.85 | -3.09 | -2264.74 | 6.E-22 |

|        |                        |         |         |       |         |        |
|--------|------------------------|---------|---------|-------|---------|--------|
| P20700 | AEHDQLLLNYAK           | 1417.70 | 1413.73 | 3.97  | 2799.40 | 6.E-22 |
| P20700 | AEHDQLLLNYAK           | 1417.68 | 1413.73 | 3.95  | 2783.58 | 6.E-22 |
| P20700 | AEHDQLLLNYAK           | 1413.73 | 1413.73 | 0.00  | 3.04    | 6.E-22 |
| P05787 | YEELQSLAGK             | 1136.57 | 1136.57 | 0.00  | 1.99    | 7.E-22 |
| P16403 | ERSGVSLAALK            | 1131.66 | 1129.65 | 2.01  | 1773.78 | 8.E-22 |
| Q04695 | VRALEEANTELEVK         | 1599.85 | 1599.85 | 0.00  | 2.33    | 8.E-22 |
| P02545 | RQNGDDPLLTYRFPPK       | 1916.97 | 1915.99 | 0.98  | 513.46  | 8.E-22 |
| P67809 | GAEAAVNTGPGGVPVQGSK    | 1694.83 | 1694.86 | -0.03 | -16.82  | 8.E-22 |
| P26373 | LILFPRKPSAPK           | 1367.77 | 1365.85 | 1.92  | 1403.67 | 8.E-22 |
| P26373 | LILFPRKPSAPK           | 1365.85 | 1365.85 | 0.00  | 0.44    | 8.E-22 |
| P14384 | GQVFDQNGNPLPNVIVEVQDRK | 2465.28 | 2465.27 | 0.01  | 2.09    | 8.E-22 |
| P09661 | NAIANASTLAEVERLK       | 1698.93 | 1698.93 | 0.00  | 0.82    | 8.E-22 |
| O43390 | DYAFVHFEDRGA AVK       | 1731.87 | 1723.83 | 8.04  | 4640.90 | 8.E-22 |
| Q8IWX8 | LAQFVARNGPEFEK         | 1604.83 | 1604.83 | 0.00  | 1.09    | 8.E-22 |
| Q8IWX8 | LAQFVARNGPEFEK         | 1603.80 | 1604.83 | -1.03 | -644.75 | 8.E-22 |

|        |                      |         |         |       |          |        |
|--------|----------------------|---------|---------|-------|----------|--------|
| P07355 | AYTNFDAERDALNIETAIK  | 2154.06 | 2154.06 | 0.00  | 2.19     | 9.E-22 |
| P62701 | PWISLPRGK            | 1052.61 | 1052.61 | 0.00  | 1.45     | 9.E-22 |
| P12270 | (41)AAVLQQVLERTELNK  | 1752.97 | 1752.97 | 0.00  | 1.48     | 9.E-22 |
| P22626 | IDTIEIITDRQSGK       | 1587.85 | 1587.85 | 0.00  | 2.79     | 9.E-22 |
| Q04695 | EPVTTRQVRTIVEEVQDGK  | 2183.16 | 2183.15 | 0.01  | 3.08     | 9.E-22 |
| Q07020 | SQDIYLRLLVK          | 1346.79 | 1346.79 | 0.00  | 1.44     | 1.E-21 |
| P16403 | ERSGVSLAALK          | 1129.65 | 1129.65 | 0.00  | -0.17    | 1.E-21 |
| P16403 | ERSGVSLAALK          | 1129.64 | 1129.65 | -0.01 | -10.97   | 1.E-21 |
| P16403 | ERSGVSLAALK          | 1127.62 | 1129.65 | -2.03 | -1795.99 | 1.E-21 |
| P16403 | (51)SETAPAAPAAAPPAEK | 1519.70 | 1519.75 | -0.05 | -31.73   | 1.E-21 |
| P62701 | VNDTIQIDLETGK        | 1444.74 | 1444.74 | 0.00  | 1.37     | 1.E-21 |
| Q12906 | LFPDTPLALDANK        | 1413.83 | 1413.75 | 0.08  | 56.98    | 1.E-21 |
| Q12906 | LFPDTPLALDANK        | 1413.75 | 1413.75 | 0.00  | 1.38     | 1.E-21 |
| Q9NY12 | VPYFNAPVYLENK        | 1552.79 | 1552.79 | 0.00  | -0.16    | 1.E-21 |
| Q9NY12 | VPYFNAPVYLENK        | 1552.77 | 1552.79 | -0.02 | -15.75   | 1.E-21 |

|        |                             |         |         |       |          |        |
|--------|-----------------------------|---------|---------|-------|----------|--------|
| P08729 | LEAAIAEAEERGELALK           | 1807.87 | 1811.96 | -4.09 | -2262.51 | 1.E-21 |
| Q9UMS4 | TVPEELVKPEELSK              | 1593.77 | 1596.86 | -3.09 | -1940.63 | 1.E-21 |
| P11021 | DAGTIAGLNVMRIINEPTAAAIYGLDK | 2860.55 | 2857.50 | 3.05  | 1065.21  | 1.E-21 |
| P16403 | ERSGVSLAALK                 | 1131.66 | 1129.65 | 2.01  | 1774.05  | 1.E-21 |
| P16403 | (51)SETAPAAPAAAPPAEK        | 1519.78 | 1519.75 | 0.03  | 20.45    | 1.E-21 |
| P16403 | (51)SETAPAAPAAAPPAEK        | 1519.75 | 1519.75 | 0.00  | -0.81    | 1.E-21 |
| P16403 | (51)SETAPAAPAAAPPAEK        | 1519.72 | 1519.75 | -0.03 | -17.39   | 1.E-21 |
| Q14103 | IFVGGLSPDTPEEK              | 1487.75 | 1487.75 | 0.00  | 2.46     | 1.E-21 |
| Q14103 | IFVGGLSPDTPEEK              | 1483.80 | 1487.75 | -3.95 | -2659.40 | 1.E-21 |
| P02545 | RTLEGELHDLRGQVAK            | 1825.07 | 1820.99 | 4.08  | 2235.56  | 1.E-21 |
| P02545 | RTLEGELHDLRGQVAK            | 1820.99 | 1820.99 | 0.00  | 0.02     | 1.E-21 |
| P02545 | RTLEGELHDLRGQVAK            | 1819.04 | 1820.99 | -1.95 | -1074.45 | 1.E-21 |
| P02545 | AGQVVTIWAAGAGATHSPPTDLVWK   | 2532.31 | 2532.31 | 0.00  | 0.02     | 1.E-21 |
| P62906 | KYDAFLASESLIK               | 1483.79 | 1483.79 | 0.00  | -0.01    | 1.E-21 |
| P46781 | LIGEYGLRNK                  | 1161.65 | 1161.65 | 0.00  | 0.79     | 1.E-21 |

|        |                   |         |         |       |         |        |
|--------|-------------------|---------|---------|-------|---------|--------|
| P46781 | LIGFYGLRNL        | 1161.64 | 1161.65 | -0.01 | -10.58  | 1.E-21 |
| P08729 | LEAAIAEAEERGELALK | 1811.97 | 1811.96 | 0.01  | 3.68    | 1.E-21 |
| P08729 | LEAAIAEAEERGELALK | 1811.80 | 1811.96 | -0.16 | -87.83  | 1.E-21 |
| P16403 | ASGPPVSELITK      | 1197.66 | 1197.66 | 0.00  | 0.19    | 1.E-21 |
| P16403 | ASGPPVSELITK      | 1197.65 | 1197.66 | -0.01 | -12.25  | 1.E-21 |
| Q07021 | AFVDFLSDEIK       | 1283.65 | 1282.64 | 1.01  | 782.94  | 1.E-21 |
| P09661 | NAIANASTLAEVERLK  | 1698.93 | 1698.93 | 0.00  | 0.87    | 1.E-21 |
| Q9UMS4 | TVPEELVKPEELSK    | 1599.85 | 1596.86 | 2.99  | 1869.16 | 1.E-21 |
| Q9UMS4 | TVPEELVKPEELSK    | 1596.86 | 1596.86 | 0.00  | 3.00    | 1.E-21 |
| Q9UHX1 | FGAVNRVVIYQEK     | 1535.85 | 1535.85 | 0.00  | 3.00    | 1.E-21 |
| P16403 | ERSGVSLAALK       | 1132.65 | 1129.65 | 3.00  | 2649.29 | 1.E-21 |
| P16403 | ERSGVSLAALK       | 1129.65 | 1129.65 | 0.00  | 0.09    | 2.E-21 |
| P16403 | ERSGVSLAALK       | 1129.64 | 1129.65 | -0.01 | -10.80  | 2.E-21 |
| Q13435 | RGIEKPPFELPDFIK   | 1784.98 | 1784.98 | 0.00  | 1.76    | 2.E-21 |
| Q6P5A3 | TLLSRIAENLPK      | 1353.80 | 1353.80 | 0.00  | 1.05    | 2.E-21 |

|        |                               |         |         |       |          |        |
|--------|-------------------------------|---------|---------|-------|----------|--------|
| Q9NR30 | GRGVTFLLFPIQAK                | 1427.86 | 1432.82 | -4.96 | -3474.60 | 2.E-21 |
| P08758 | (41)AQVLRGTVTDFPGFDERADAETLRK | 2837.37 | 2833.44 | 3.93  | 1384.93  | 2.E-21 |
| P08758 | (41)AQVLRGTVTDFPGFDERADAETLRK | 2833.44 | 2833.44 | 0.00  | 1.36     | 2.E-21 |
| O75934 | RYELPAPSSGQK                  | 1331.68 | 1331.68 | 0.00  | -0.03    | 2.E-21 |
| O75934 | RYELPAPSSGQK                  | 1331.66 | 1331.68 | -0.02 | -14.53   | 2.E-21 |
| O75934 | RYELPAPSSGQK                  | 1330.63 | 1331.68 | -1.05 | -788.00  | 2.E-21 |
| P09661 | NAIANASTLAEVERLK              | 1698.93 | 1698.93 | 0.00  | 1.29     | 2.E-21 |
| P15880 | SPYQEFTDHLVK                  | 1464.72 | 1462.71 | 2.01  | 1371.24  | 2.E-21 |
| P02545 | NIYSEELRETK                   | 1376.69 | 1380.69 | -4.00 | -2909.09 | 2.E-21 |
| A6NI71 | (41)ATDTSQGELVHPK             | 1423.69 | 1423.69 | 0.00  | 1.10     | 2.E-21 |
| P0C0S8 | VTIAQGGVLPNIQAVLLPK           | 1930.16 | 1930.16 | 0.00  | 0.01     | 2.E-21 |
| P0C0S8 | VTIAQGGVLPNIQAVLLPK           | 1930.12 | 1930.16 | -0.04 | -19.94   | 2.E-21 |
| O43390 | VTEGLVDVILYHQPDDK             | 1942.10 | 1939.99 | 2.11  | 1085.19  | 2.E-21 |
| P62987 | IIEPSLRQLAQQ                  | 1390.82 | 1394.82 | -4.00 | -2872.77 | 2.E-21 |
| Q9NR30 | GRGVTFLLFPIQAK                | 1432.82 | 1432.82 | 0.00  | -1.21    | 2.E-21 |



|        |                               |         |         |       |          |        |
|--------|-------------------------------|---------|---------|-------|----------|--------|
| P20073 | GFGTDEQAIVDVVANRSNDQRQK       | 2549.18 | 2546.25 | 2.93  | 1148.60  | 2.E-21 |
| P08758 | (41)AQVLRGTVTDFPGFDERADAETLRK | 2833.45 | 2833.44 | 0.01  | 2.60     | 2.E-21 |
| P02545 | RTLEGELHDLRGQVAK              | 1820.99 | 1820.99 | 0.00  | -0.09    | 2.E-21 |
| P02545 | RTLEGELHDLRGQVAK              | 1819.04 | 1820.99 | -1.95 | -1074.50 | 2.E-21 |
| Q14683 | VVQLHEYSEELEK                 | 1604.83 | 1601.79 | 3.04  | 1893.05  | 2.E-21 |
| Q14683 | VVQLHEYSEELEK                 | 1603.79 | 1601.79 | 2.00  | 1248.43  | 2.E-21 |
| Q14683 | VVQLHEYSEELEK                 | 1603.77 | 1601.79 | 1.98  | 1231.93  | 2.E-21 |
| Q14683 | VVQLHEYSEELEK                 | 1601.79 | 1601.79 | 0.00  | 0.83     | 2.E-21 |
| P02545 | NIYSEELRETK                   | 1380.69 | 1380.69 | 0.00  | 0.37     | 2.E-21 |
| P05388 | LLPHIRGNVGFVFTK               | 1696.98 | 1696.98 | 0.00  | 0.26     | 2.E-21 |
| Q71U36 | VGINYQPPTVPPGGDLAK            | 1823.99 | 1823.98 | 0.01  | 2.85     | 3.E-21 |
| Q71U36 | VGINYQPPTVPPGGDLAK            | 1820.99 | 1823.98 | -2.99 | -1640.21 | 3.E-21 |
| Q9UQE7 | AELGTDLLSQLSLEDQK             | 1858.96 | 1858.95 | 0.01  | 2.93     | 3.E-21 |
| P16403 | ERSGVSLAALK                   | 1129.65 | 1129.65 | 0.00  | 0.09     | 3.E-21 |
| P61247 | LMELHGEHSSSGK                 | 1334.69 | 1330.62 | 4.07  | 3047.76  | 3.E-21 |

|        |                                 |         |         |      |         |        |
|--------|---------------------------------|---------|---------|------|---------|--------|
| Q3BDU5 | LVRSVTVVEDDEDEDGDDLLHHHHVSGSRR  | 3422.62 | 3422.62 | 0.00 | 1.03    | 3.E-21 |
| O75367 | EFVEAVLELRK                     | 1331.74 | 1331.74 | 0.00 | 0.40    | 3.E-21 |
| P11142 | SQIHDIVLVGGSTRIPK               | 1820.98 | 1819.03 | 1.95 | 1072.03 | 3.E-21 |
| P11142 | SQIHDIVLVGGSTRIPK               | 1820.44 | 1819.03 | 1.41 | 775.17  | 3.E-21 |
| P11142 | SQIHDIVLVGGSTRIPK               | 1819.03 | 1819.03 | 0.00 | -0.19   | 3.E-21 |
| Q9H307 | (41)AVAVRTLQEQLK                | 1525.85 | 1525.85 | 0.00 | -0.27   | 3.E-21 |
| Q13421 | LRTDAVLPLTVAEVQK                | 1758.80 | 1752.01 | 6.79 | 3858.14 | 3.E-21 |
| Q13421 | LRTDAVLPLTVAEVQK                | 1758.76 | 1752.01 | 6.75 | 3839.40 | 3.E-21 |
| P07355 | GDLENAFLNLVQCIQNK               | 1974.98 | 1974.98 | 0.00 | 1.17    | 3.E-21 |
| O43159 | FQPPQVPDQAPAEAPTEK              | 1948.96 | 1948.95 | 0.01 | 3.17    | 3.E-21 |
| P08107 | SENVQDLLLLDVAPLSLGLTAGGVM TALIK | 3179.74 | 3179.74 | 0.00 | -1.52   | 3.E-21 |
| Q9Y310 | NVTDVVNTCHDAGISK                | 1732.93 | 1728.81 | 4.12 | 2376.11 | 3.E-21 |
| Q9Y310 | NVTDVVNTCHDAGISK                | 1728.82 | 1728.81 | 0.01 | 2.90    | 3.E-21 |
| P62987 | IIEPSLRQLAQK                    | 1394.82 | 1394.82 | 0.00 | 0.34    | 3.E-21 |
| P16403 | ASGPPVSELITK                    | 1197.66 | 1197.66 | 0.00 | -0.81   | 4.E-21 |

|        |                                     |         |         |       |          |        |
|--------|-------------------------------------|---------|---------|-------|----------|--------|
| Q9Y5B9 | APGEQTVPALNLQNAFRIIK                | 2179.21 | 2179.21 | 0.00  | 1.29     | 4.E-21 |
| P61978 | IILDLISESPIK                        | 1341.78 | 1339.80 | 1.98  | 1473.84  | 4.E-21 |
| Q02539 | ALAAAGYDVEK                         | 1106.56 | 1106.56 | 0.00  | -0.32    | 4.E-21 |
| Q02539 | ALAAAGYDVEK                         | 1106.55 | 1106.56 | -0.01 | -11.71   | 4.E-21 |
| Q02539 | ALAAAGYDVEK                         | 1105.59 | 1106.56 | -0.97 | -879.94  | 4.E-21 |
| P61978 | ALRTDYNASVSPDSSGPERILSISADIETIGEILK | 3815.98 | 3815.98 | 0.00  | -1.18    | 4.E-21 |
| P34931 | VEIANDQGNRTTPSYVAFTDTERLIGDAAK      | 3366.70 | 3364.69 | 2.01  | 597.69   | 4.E-21 |
| P07355 | SALSGHLETVILGLLK                    | 1649.97 | 1649.97 | 0.00  | 0.99     | 4.E-21 |
| P02545 | RTLEGELHDLRGQVAK                    | 1825.07 | 1820.99 | 4.08  | 2235.40  | 4.E-21 |
| P02545 | RTLEGELHDLRGQVAK                    | 1820.99 | 1820.99 | 0.00  | 0.52     | 4.E-21 |
| P02545 | RTLEGELHDLRGQVAK                    | 1819.04 | 1820.99 | -1.95 | -1073.84 | 4.E-21 |
| P08758 | (41)AQVLRGTVTDFPGFDERADAETLRK       | 2833.44 | 2833.44 | 0.00  | 1.75     | 4.E-21 |
| Q9Y230 | EYQDAFLFNELK                        | 1515.72 | 1515.72 | 0.00  | 2.29     | 4.E-21 |
| P02545 | RQNGDDPLLTYRFPK                     | 1916.98 | 1915.99 | 0.99  | 514.86   | 4.E-21 |
| P19338 | EVFEDAAEIRLVSK                      | 1604.84 | 1604.84 | 0.00  | -0.34    | 4.E-21 |

|        |                                           |         |         |       |         |        |
|--------|-------------------------------------------|---------|---------|-------|---------|--------|
| P17676 | VLELTAENERLQK                             | 1542.82 | 1541.84 | 0.98  | 634.04  | 4.E-21 |
| P17676 | VLELTAENERLQK                             | 1541.85 | 1541.84 | 0.01  | 3.31    | 4.E-21 |
| P62906 | KYDAFLASESLIK                             | 1483.79 | 1483.79 | 0.00  | 0.93    | 5.E-21 |
| P67809 | GAEAANVTGPGGVPVQGSK                       | 1694.86 | 1694.86 | 0.00  | 1.76    | 5.E-21 |
| P67809 | GAEAANVTGPGGVPVQGSK                       | 1694.83 | 1694.86 | -0.03 | -16.35  | 5.E-21 |
| P20073 | GFGTDEQAIVDVVANRSNDQRQK                   | 2546.26 | 2546.25 | 0.01  | 2.79    | 5.E-21 |
| Q3BDU5 | LDNARQSAERNSNLVGAAHEELQQSRIRIDSLSAQLSQLQK | 4573.36 | 4573.37 | -0.01 | -2.09   | 5.E-21 |
| Q16891 | TSSAETPTIPLGSAVEAIK                       | 1870.99 | 1870.99 | 0.00  | 0.73    | 5.E-21 |
| Q8TDN6 | TLLPHDPTADVFTPAEEK                        | 2079.06 | 2079.05 | 0.01  | 2.60    | 5.E-21 |
| Q09028 | TPSSDVLVFDYTK                             | 1474.88 | 1470.72 | 4.16  | 2821.91 | 5.E-21 |
| P61247 | LMELHGE GSSSGK                            | 1330.72 | 1330.62 | 0.10  | 75.15   | 5.E-21 |
| P61247 | LMELHGE GSSSGK                            | 1330.62 | 1330.62 | 0.00  | 0.08    | 5.E-21 |
| P61978 | IILDLISESPIK                              | 1339.80 | 1339.80 | 0.00  | 0.65    | 5.E-21 |
| P08670 | FADLSEAANRNNDALRQAK                       | 2103.09 | 2103.05 | 0.04  | 21.11   | 5.E-21 |
| P08670 | FADLSEAANRNNDALRQAK                       | 2103.05 | 2103.05 | 0.00  | 1.14    | 5.E-21 |

|        |                          |         |         |       |         |        |
|--------|--------------------------|---------|---------|-------|---------|--------|
| P08670 | FADLSEAAANRRNDALRQAK     | 2103.02 | 2103.05 | -0.03 | -13.50  | 5.E-21 |
| P08670 | FADLSEAAANRRNDALRQAK     | 2102.99 | 2103.05 | -0.06 | -26.63  | 5.E-21 |
| Q99829 | TLQLEYRFETVQK            | 1653.87 | 1653.87 | 0.00  | 2.54    | 5.E-21 |
| P20700 | VDLENRCQSLTEDLEFRK       | 2251.09 | 2251.09 | 0.00  | 0.99    | 5.E-21 |
| Q8IVT2 | GAPHSSPARGTPAGTTPGASQAPK | 2200.11 | 2200.10 | 0.01  | 3.02    | 5.E-21 |
| Q14978 | ATGATQQDANASSLLDIYSFWLK  | 2499.24 | 2499.23 | 0.01  | 2.87    | 6.E-21 |
| Q07021 | AFVDFLSDEIK              | 1289.63 | 1282.64 | 6.99  | 5419.23 | 6.E-21 |
| Q07021 | AFVDFLSDEIK              | 1288.54 | 1282.64 | 5.90  | 4577.74 | 6.E-21 |
| Q09161 | DGVLEEQIERLQEK           | 1684.86 | 1684.86 | 0.00  | -0.44   | 6.E-21 |
| P61313 | YIQELWRK                 | 1138.71 | 1134.62 | 4.09  | 3592.08 | 6.E-21 |
| P61313 | YIQELWRK                 | 1134.62 | 1134.62 | 0.00  | 1.62    | 6.E-21 |
| P61981 | TAFDDAIAELDTLNEDSYK      | 2129.96 | 2129.96 | 0.00  | 0.64    | 7.E-21 |
| P45973 | KREQSNDIARGFERGLEPEK     | 2358.20 | 2358.20 | 0.00  | 0.86    | 7.E-21 |
| P05783 | KGPQVRDWSHYFK            | 1646.83 | 1646.83 | 0.00  | 2.35    | 7.E-21 |
| P05783 | KGPQVRDWSHYFK            | 1646.81 | 1646.83 | -0.02 | -10.10  | 7.E-21 |

|        |                        |         |         |       |         |        |
|--------|------------------------|---------|---------|-------|---------|--------|
| P26373 | LATQLTGPVMPVRNVYK      | 1887.04 | 1886.04 | 1.00  | 532.49  | 7.E-21 |
| Q12906 | VADNLAIQLAAVTEDK       | 1669.71 | 1669.89 | -0.18 | -105.78 | 8.E-21 |
| P23396 | RFGFPEGSVELYAEK        | 1727.85 | 1727.85 | 0.00  | 1.31    | 8.E-21 |
| Q13435 | RAAVLLEQERQQEIAK       | 1881.05 | 1881.04 | 0.01  | 2.78    | 8.E-21 |
| Q13523 | LDDLALLEDEK            | 1385.73 | 1385.73 | 0.00  | 0.62    | 8.E-21 |
| P62906 | KYDAFLASESLIK          | 1485.82 | 1483.79 | 2.03  | 1364.42 | 8.E-21 |
| P62906 | KYDAFLASESLIK          | 1483.79 | 1483.79 | 0.00  | -0.14   | 8.E-21 |
| P05787 | LSELEAALQRAK           | 1328.83 | 1327.75 | 1.08  | 811.44  | 8.E-21 |
| P19338 | TLVLSNLSYSATEETLQEVFEK | 2500.26 | 2500.26 | 0.00  | -1.81   | 9.E-21 |
| Q09028 | TPSSDVLVFDYTK          | 1470.72 | 1470.72 | 0.00  | 2.92    | 9.E-21 |
| P07910 | LKGDDLQAIKK            | 1227.72 | 1227.72 | 0.00  | 0.28    | 9.E-21 |
| P18583 | (41)ATNIEQIFRSFVSK     | 1779.95 | 1779.95 | 0.00  | 1.55    | 1.E-20 |
| P62826 | PFLWLARK               | 1029.61 | 1029.61 | 0.00  | 0.93    | 1.E-20 |
| P08758 | VLTEIIASRTPEELRAIK     | 2038.18 | 2038.18 | 0.00  | 0.93    | 1.E-20 |
| P20700 | VDLENRCQSLTEDLEFRK     | 2251.09 | 2251.09 | 0.00  | 0.10    | 1.E-20 |

|        |                     |         |         |       |          |        |
|--------|---------------------|---------|---------|-------|----------|--------|
| P09525 | SETSGSFEDALLAIVK    | 1666.85 | 1665.85 | 1.00  | 602.70   | 1.E-20 |
| Q12906 | VADNLAIQLAAVTEDK    | 1669.89 | 1669.89 | 0.00  | 0.28     | 1.E-20 |
| P07355 | SYSPYDMLESIRK       | 1587.76 | 1587.76 | 0.00  | 2.15     | 1.E-20 |
| P26599 | LPIDVTEGEVISLGLPFGK | 1983.09 | 1983.09 | 0.00  | 2.23     | 1.E-20 |
| P63104 | TAFDEAIAELDTLSEESYK | 2130.98 | 2130.98 | 0.00  | 1.49     | 1.E-20 |
| P26373 | STESLQANVQRLK       | 1473.77 | 1472.79 | 0.98  | 664.83   | 1.E-20 |
| P26373 | STESLQANVQRLK       | 1472.79 | 1472.79 | 0.00  | -0.81    | 1.E-20 |
| P07355 | SALSGHLETVILGLLK    | 1649.97 | 1649.97 | 0.00  | 0.26     | 1.E-20 |
| Q04695 | VRALEEANTELEVK      | 1599.85 | 1599.85 | 0.00  | 2.96     | 1.E-20 |
| P05787 | LSELEAALQRAK        | 1327.75 | 1327.75 | 0.00  | 1.03     | 1.E-20 |
| P05787 | LSELEAALQRAK        | 1324.78 | 1327.75 | -2.97 | -2241.46 | 1.E-20 |
| P0C0S8 | VTIAQGGVLPNIQAVLLPK | 1930.16 | 1930.16 | 0.00  | 0.01     | 1.E-20 |
| P0C0S8 | VTIAQGGVLPNIQAVLLPK | 1930.12 | 1930.16 | -0.04 | -19.94   | 1.E-20 |
| P26373 | STESLQANVQRLK       | 1477.76 | 1472.79 | 4.97  | 3361.50  | 1.E-20 |
| P09661 | NAIANASTLAEVERLK    | 1698.93 | 1698.93 | 0.00  | 0.40     | 1.E-20 |

|        |                    |         |         |       |          |        |
|--------|--------------------|---------|---------|-------|----------|--------|
| Q9Y224 | NAEPLINLDVNNPDFK   | 1811.91 | 1811.91 | 0.00  | 1.13     | 1.E-20 |
| A6NDV6 | VRALEEADTELEVK     | 1600.84 | 1600.83 | 0.01  | 3.20     | 2.E-20 |
| P46783 | NRIAIYELLFK        | 1378.80 | 1378.80 | 0.00  | 0.84     | 2.E-20 |
| P46783 | NRIAIYELLFK        | 1378.78 | 1378.80 | -0.02 | -13.60   | 2.E-20 |
| P11142 | NSLESYAFNMK        | 1304.72 | 1302.59 | 2.13  | 1631.36  | 2.E-20 |
| Q12905 | LDPELHLDIK         | 1191.65 | 1191.65 | 0.00  | 2.43     | 2.E-20 |
| Q12905 | LDPELHLDIK         | 1188.61 | 1191.65 | -3.04 | -2557.02 | 2.E-20 |
| P61247 | LMELHGEGSSSGK      | 1334.69 | 1330.62 | 4.07  | 3047.69  | 2.E-20 |
| O60506 | VLFVRNLANTVTEEILEK | 2087.16 | 2087.16 | 0.00  | -0.77    | 2.E-20 |
| Q9Y5S9 | GYTLVEYETYK        | 1364.65 | 1364.65 | 0.00  | 1.04     | 2.E-20 |
| O00148 | LTLHGLQQYYVK       | 1461.80 | 1461.80 | 0.00  | 2.54     | 2.E-20 |
| O00148 | LTLHGLQQYYVK       | 1459.80 | 1461.80 | -2.00 | -1371.76 | 2.E-20 |
| Q99848 | PGLNVVLEGPKK       | 1249.74 | 1249.74 | 0.00  | 0.81     | 2.E-20 |
| P62906 | KYDAFLASESLIK      | 1483.79 | 1483.79 | 0.00  | -0.08    | 2.E-20 |
| P62906 | KYDAFLASESLIK      | 1483.77 | 1483.79 | -0.02 | -14.97   | 2.E-20 |



|        |                                        |         |         |       |         |        |
|--------|----------------------------------------|---------|---------|-------|---------|--------|
| O95453 | DIINNTSLAELEK                          | 1458.76 | 1458.76 | 0.00  | 0.57    | 2.E-20 |
| O95453 | DIINNTSLAELEK                          | 1457.86 | 1458.76 | -0.90 | -616.91 | 2.E-20 |
| P09661 | TFNPGAGLPTDK                           | 1216.61 | 1216.61 | 0.00  | 0.51    | 2.E-20 |
| P09661 | TFNPGAGLPTDK                           | 1216.60 | 1216.61 | -0.01 | -11.57  | 2.E-20 |
| P49736 | NFLRTHVDSHGHNVFK                       | 1906.96 | 1906.96 | 0.00  | 1.55    | 2.E-20 |
| O60506 | YGGPPPDSVYSGQQPSVGTEIFVGK              | 2565.24 | 2565.24 | 0.00  | -1.09   | 2.E-20 |
| P08107 | AQIHDLVLVGGSTRIPK                      | 1803.04 | 1803.04 | 0.00  | 0.10    | 2.E-20 |
| P25205 | (41)AGTVVLDDVELREAQRDYLDLDDDEEDQGIYQSK | 3985.87 | 3985.87 | 0.00  | -0.77   | 2.E-20 |
| Q8TDN6 | FLVQNIHTLAELK                          | 1524.87 | 1524.87 | 0.00  | 2.17    | 2.E-20 |
| P07355 | AYTNFDAERDALNIETAIK                    | 2154.06 | 2154.06 | 0.00  | 2.29    | 2.E-20 |
| P19338 | EVFEDAAEIRLVSK                         | 1604.84 | 1604.84 | 0.00  | 0.03    | 2.E-20 |
| P61247 | LMELHGEGLSSSGK                         | 1330.62 | 1330.62 | 0.00  | 0.53    | 2.E-20 |
| O00148 | LTLHGLQYYVK                            | 1463.82 | 1461.80 | 2.02  | 1382.15 | 2.E-20 |
| P62917 | LARASGNATVISHNPETK                     | 2028.04 | 2028.04 | 0.00  | 0.28    | 2.E-20 |
| P17676 | KPAEYGYVSLGRLGAAK                      | 1778.97 | 1778.97 | 0.00  | 2.15    | 2.E-20 |

|        |                |         |         |       |          |        |
|--------|----------------|---------|---------|-------|----------|--------|
| P62906 | QIPRILGPGLNK   | 1308.75 | 1304.79 | 3.96  | 3023.55  | 2.E-20 |
| P62906 | QIPRILGPGLNK   | 1308.73 | 1304.79 | 3.94  | 3009.54  | 2.E-20 |
| P11142 | NSLESYAFNMK    | 1303.59 | 1302.59 | 1.00  | 770.92   | 2.E-20 |
| O95816 | HATRIIDEVVNK   | 1393.77 | 1393.77 | 0.00  | 0.41     | 2.E-20 |
| O95816 | HATRIIDEVVNK   | 1393.75 | 1393.77 | -0.02 | -13.66   | 2.E-20 |
| Q9NR30 | EGAFSNFPSEETIK | 1669.81 | 1667.80 | 2.01  | 1203.53  | 2.E-20 |
| P13010 | SQLDIIIHSLK    | 1265.73 | 1265.73 | 0.00  | -0.64    | 2.E-20 |
| P13010 | SQLDIIIHSLK    | 1265.71 | 1265.73 | -0.02 | -12.81   | 2.E-20 |
| O95453 | DIINNTSLAELEK  | 1462.82 | 1458.76 | 4.06  | 2772.22  | 2.E-20 |
| O95453 | DIINNTSLAELEK  | 1460.74 | 1458.76 | 1.98  | 1357.90  | 2.E-20 |
| Q13185 | KVEEAPEEFVVEK  | 1660.82 | 1660.82 | 0.00  | 1.12     | 2.E-20 |
| Q04695 | VRALEEANTELEVK | 1599.85 | 1599.85 | 0.00  | 2.40     | 2.E-20 |
| Q12905 | PAPDETSFSEALLK | 1507.78 | 1503.75 | 4.03  | 2672.51  | 3.E-20 |
| Q12905 | PAPDETSFSEALLK | 1503.75 | 1503.75 | 0.00  | 2.76     | 3.E-20 |
| Q12905 | PAPDETSFSEALLK | 1500.71 | 1503.75 | -3.04 | -2026.22 | 3.E-20 |

|        |                                |         |         |       |         |        |
|--------|--------------------------------|---------|---------|-------|---------|--------|
| P08758 | VLTEIIASRTPEELRAIK             | 2038.18 | 2038.18 | 0.00  | 1.38    | 3.E-20 |
| O60506 | EFNEDGALAVLQQFK                | 1707.85 | 1707.85 | 0.00  | 0.49    | 3.E-20 |
| P62906 | QIPRILGPGLNK                   | 1309.78 | 1304.79 | 4.99  | 3809.32 | 3.E-20 |
| P07355 | LSLEGDHSTPPSAYGSVK             | 1843.91 | 1843.90 | 0.01  | 3.16    | 3.E-20 |
| P08758 | (41)AQVLRGTVTDFPGFDERADAETLRK  | 2838.37 | 2833.44 | 4.93  | 1738.20 | 3.E-20 |
| P08758 | (41)AQVLRGTVTDFPGFDERADAETLRK  | 2833.44 | 2833.44 | 0.00  | 1.40    | 3.E-20 |
| P02545 | NIYSEELRETK                    | 1380.69 | 1380.69 | 0.00  | 2.32    | 3.E-20 |
| Q8IVT2 | VNRIPPDAYQPYLSPGTPQLEFSAFGAFGK | 3266.64 | 3266.64 | 0.00  | -1.50   | 3.E-20 |
| P39023 | PVHLTAFLGYK                    | 1246.70 | 1244.69 | 2.01  | 1613.36 | 4.E-20 |
| P19388 | IIRPSETAGRYITYRLVQ             | 2135.19 | 2135.19 | 0.00  | 1.08    | 4.E-20 |
| P62906 | QIPRILGPGLNK                   | 1304.79 | 1304.79 | 0.00  | 0.06    | 4.E-20 |
| P62906 | QIPRILGPGLNK                   | 1304.77 | 1304.79 | -0.02 | -14.20  | 4.E-20 |
| P07355 | GLGTDEDSLIEIICSRTNQELQEINRVYK  | 3406.70 | 3392.69 | 14.01 | 4113.90 | 4.E-20 |
| O43395 | PFLDDSTLRFVDK                  | 1551.79 | 1551.79 | 0.00  | 0.53    | 4.E-20 |
| O75367 | EFVEAVLELRK                    | 1331.82 | 1331.74 | 0.08  | 62.42   | 4.E-20 |

|        |                     |         |         |        |          |        |
|--------|---------------------|---------|---------|--------|----------|--------|
| O75367 | EFVEAVLELRK         | 1331.74 | 1331.74 | 0.00   | -0.20    | 4.E-20 |
| O75367 | EFVEAVLELRK         | 1331.72 | 1331.74 | -0.02  | -13.87   | 4.E-20 |
| P39023 | PVHLTAFLGYK         | 1244.69 | 1244.69 | 0.00   | 2.88     | 4.E-20 |
| Q04695 | VRALEEANTELEVK      | 1599.85 | 1599.85 | 0.00   | 2.52     | 4.E-20 |
| P63220 | QNDAGEFVDLYVPRK     | 1938.92 | 1749.87 | 189.05 | 97502.30 | 4.E-20 |
| P16403 | ERSGVSLAALK         | 1131.66 | 1129.65 | 2.01   | 1773.87  | 4.E-20 |
| P07355 | AYTNFDAERDALNIETAIK | 2154.06 | 2154.06 | 0.00   | 0.80     | 4.E-20 |
| P02545 | RQNGDDPLLTYRFPPK    | 1916.97 | 1915.99 | 0.98   | 513.35   | 4.E-20 |
| Q04695 | VRALEEANTELEVK      | 1600.86 | 1599.85 | 1.01   | 629.81   | 4.E-20 |
| P19338 | GFGFVDFNSEEDAK      | 1560.67 | 1560.67 | 0.00   | 0.50     | 4.E-20 |
| P49736 | IFASIAPSIYGHEDIK    | 1762.93 | 1759.91 | 3.02   | 1711.61  | 5.E-20 |
| P49736 | IFASIAPSIYGHEDIK    | 1759.92 | 1759.91 | 0.01   | 3.90     | 5.E-20 |
| P20700 | AEHDQLLLLNYAK       | 1415.71 | 1413.73 | 1.98   | 1400.85  | 5.E-20 |
| P20700 | AEHDQLLLLNYAK       | 1413.73 | 1413.73 | 0.00   | 2.97     | 5.E-20 |
| Q9Y310 | (51)SRSYNDELQFLEK   | 1669.80 | 1669.79 | 0.01   | 3.24     | 6.E-20 |

|        |                                        |         |         |       |         |        |
|--------|----------------------------------------|---------|---------|-------|---------|--------|
| P60709 | ILTERGYSFTTTAEREIVRDIK                 | 2597.38 | 2597.38 | 0.00  | 0.51    | 6.E-20 |
| P60709 | ILTERGYSFTTTAEREIVRDIK                 | 2597.35 | 2597.38 | -0.03 | -11.73  | 6.E-20 |
| P62987 | IIEPSLRQLAQK                           | 1394.82 | 1394.82 | 0.00  | 0.56    | 6.E-20 |
| Q04695 | VRALEEANTELEVK                         | 1599.86 | 1599.85 | 0.01  | 3.21    | 6.E-20 |
| P02545 | AGQVVTIWAAGAGATHSPPTDLVWK              | 2532.31 | 2532.31 | 0.00  | 0.57    | 6.E-20 |
| P08758 | VLTEIIASRTPEELRAIK                     | 2041.19 | 2038.18 | 3.01  | 1475.61 | 6.E-20 |
| Q08211 | VNLSQDLEHQLQNIQELNLEILPPPEDPSVPVALNIGK | 4326.32 | 4326.31 | 0.01  | 2.83    | 6.E-20 |
| Q08211 | VNLSQDLEHQLQNIQELNLEILPPPEDPSVPVALNIGK | 4326.19 | 4326.31 | -0.12 | -27.95  | 6.E-20 |
| P11940 | ALYDTFSAFGNILSCK                       | 1805.87 | 1805.87 | 0.00  | -1.16   | 6.E-20 |
| Q12905 | ILPTLEAVAALGNK                         | 1408.83 | 1408.83 | 0.00  | 2.25    | 6.E-20 |
| Q12905 | ILPTLEAVAALGNK                         | 1408.81 | 1408.83 | -0.02 | -13.22  | 6.E-20 |
| P16403 | ERSGVSLAALK                            | 1129.65 | 1129.65 | 0.00  | 0.00    | 6.E-20 |
| P16403 | ERSGVSLAALK                            | 1129.64 | 1129.65 | -0.01 | -10.62  | 6.E-20 |
| Q9NR30 | EGAFSNFPISEETIK                        | 1667.80 | 1667.80 | 0.00  | 0.82    | 6.E-20 |
| P04083 | DITSDTSGDFRNALLSLAK                    | 2023.03 | 2023.02 | 0.01  | 3.48    | 6.E-20 |

|        |                          |         |         |       |         |        |
|--------|--------------------------|---------|---------|-------|---------|--------|
| O00148 | LTLHGLQQYYVK             | 1463.82 | 1461.80 | 2.02  | 1382.15 | 7.E-20 |
| O00148 | LTLHGLQQYYVK             | 1461.80 | 1461.80 | 0.00  | 2.54    | 7.E-20 |
| Q53HU8 | VELQELNDRFANYIDK         | 1966.99 | 1965.98 | 1.01  | 513.13  | 7.E-20 |
| O60812 | KSDVEAIFSK               | 1127.56 | 1122.59 | 4.97  | 4410.33 | 7.E-20 |
| P84103 | VYVGNLGNNGNK             | 1250.62 | 1247.63 | 2.99  | 2392.55 | 7.E-20 |
| Q9UMS4 | VAHPIRPKPPSATSIPAILK     | 2092.26 | 2092.25 | 0.01  | 2.66    | 7.E-20 |
| Q09028 | TVALWDLRNLK              | 1327.76 | 1327.76 | 0.00  | 2.34    | 7.E-20 |
| P11021 | TFAPEEISAMVLTK           | 1535.79 | 1535.79 | 0.00  | -0.13   | 8.E-20 |
| Q08945 | SDHPGISITDLSK            | 1368.69 | 1368.69 | 0.00  | 0.45    | 8.E-20 |
| Q08945 | SDHPGISITDLSK            | 1368.64 | 1368.69 | -0.05 | -34.91  | 8.E-20 |
| O60506 | YGGPPDSVYSGQQPSVGTEIFVGK | 2565.24 | 2565.24 | 0.00  | -0.46   | 8.E-20 |
| Q13151 | RGFGFVYFQNHDAADK         | 1881.00 | 1870.88 | 10.12 | 5380.79 | 8.E-20 |
| Q9Y3T9 | ERLEDLNFPEIK             | 1505.78 | 1501.78 | 4.00  | 2655.29 | 8.E-20 |
| Q9Y3T9 | ERLEDLNFPEIK             | 1501.78 | 1501.78 | 0.00  | -0.08   | 8.E-20 |
| P19338 | FGYVDFESAEDLEK           | 1647.73 | 1647.73 | 0.00  | 1.40    | 8.E-20 |

|        |                                    |         |         |       |          |        |
|--------|------------------------------------|---------|---------|-------|----------|--------|
| Q04695 | KEPVTTRQVRTIVEEVQDGK               | 2311.26 | 2311.25 | 0.01  | 2.49     | 9.E-20 |
| P56537 | LNEAQPSTIATSMRDSLIDSLT             | 2362.17 | 2362.17 | 0.00  | -0.29    | 9.E-20 |
| Q09028 | TVALWDLRNLK                        | 1331.75 | 1327.76 | 3.99  | 2993.89  | 9.E-20 |
| P05787 | LEAELGNMQGLVEDFK                   | 1791.88 | 1791.87 | 0.01  | 3.48     | 1.E-19 |
| Q04695 | VRALEEANTELEVK                     | 1595.86 | 1599.85 | -3.99 | -2499.76 | 1.E-19 |
| Q00059 | IYQDAYRAEWQVYK                     | 1831.89 | 1831.89 | 0.00  | 0.97     | 1.E-19 |
| Q12906 | PAVVAPAPVVEAVSTPSAAFPSDATAEQGPILTK | 3287.73 | 3287.73 | 0.00  | 0.38     | 1.E-19 |
| P08670 | VESLQEEIAFLK                       | 1404.75 | 1404.75 | 0.00  | 1.91     | 1.E-19 |
| Q9NWB6 | QLLEELERQRQAELAAQK                 | 2152.16 | 2152.16 | 0.00  | -1.35    | 1.E-19 |
| A6NI71 | (41)ATDTSQGELVHPK                  | 1423.69 | 1423.69 | 0.00  | 3.49     | 1.E-19 |
| A6NI71 | (41)ATDTSQGELVHPK                  | 1423.69 | 1423.69 | 0.00  | 1.10     | 1.E-19 |
| Q08945 | SDHPGISITDLSK                      | 1366.67 | 1368.69 | -2.02 | -1481.48 | 1.E-19 |
| A6NI71 | (41)ATDTSQGELVHPK                  | 1423.69 | 1423.69 | 0.00  | 0.96     | 1.E-19 |
| O60812 | LKGDDLQAIK                         | 1099.62 | 1099.62 | 0.00  | 0.10     | 1.E-19 |
| P19338 | TLVLSNLSYSATEETLQEVFEK             | 2500.26 | 2500.26 | 0.00  | -1.13    | 1.E-19 |

|        |                               |         |         |       |          |        |
|--------|-------------------------------|---------|---------|-------|----------|--------|
| P62701 | TGENFRLIYDTK                  | 1457.75 | 1455.74 | 2.01  | 1375.98  | 1.E-19 |
| P62701 | TGENFRLIYDTK                  | 1455.74 | 1455.74 | 0.00  | 0.36     | 1.E-19 |
| P08758 | (41)AQVLRGTVTDFPGFDERADAETLRK | 2833.45 | 2833.44 | 0.01  | 1.89     | 1.E-19 |
| P84103 | VYVGNLGNNGNK                  | 1249.60 | 1247.63 | 1.97  | 1577.36  | 1.E-19 |
| P84103 | VYVGNLGNNGNK                  | 1249.60 | 1247.63 | 1.97  | 1577.36  | 1.E-19 |
| P84103 | VYVGNLGNNGNK                  | 1248.61 | 1247.63 | 0.98  | 788.45   | 1.E-19 |
| P84103 | VYVGNLGNNGNK                  | 1247.66 | 1247.63 | 0.03  | 22.25    | 1.E-19 |
| P84103 | VYVGNLGNNGNK                  | 1247.63 | 1247.63 | 0.00  | 0.93     | 1.E-19 |
| Q9Y265 | TALALIAQELGSK                 | 1384.79 | 1384.79 | 0.00  | 2.49     | 1.E-19 |
| P62136 | YQQFSLNPGGRPITPPRNSAK         | 2313.20 | 2313.20 | 0.00  | 0.14     | 1.E-19 |
| P60709 | IWHHTFYNELRVAPEEHPVLLTEAPLNPK | 3506.82 | 3449.79 | 57.03 | 16262.90 | 2.E-19 |
| Q99729 | MFVGGLSWDTSK                  | 1333.80 | 1326.63 | 7.17  | 5375.77  | 2.E-19 |
| P35908 | VRFLEQQNQVLQTK                | 1733.82 | 1729.95 | 3.87  | 2234.54  | 2.E-19 |
| A6NI71 | (41)ATDTSQGELVHPK             | 1423.69 | 1423.69 | 0.00  | 1.03     | 2.E-19 |
| Q9H307 | (41)AVAVRTLQEQLK              | 1525.85 | 1525.85 | 0.00  | 2.28     | 2.E-19 |



|        |                               |         |         |       |          |        |
|--------|-------------------------------|---------|---------|-------|----------|--------|
| P08758 | (41)AQVLRGTVTDFPGFDERADAETLRK | 2857.66 | 2833.44 | 24.22 | 8474.46  | 2.E-19 |
| P27635 | RLIPDGCGVK                    | 1115.60 | 1113.60 | 2.00  | 1789.60  | 2.E-19 |
| P27635 | RLIPDGCGVK                    | 1115.51 | 1113.60 | 1.91  | 1713.36  | 2.E-19 |
| P27635 | RLIPDGCGVK                    | 1114.59 | 1113.60 | 0.99  | 889.53   | 2.E-19 |
| P27635 | RLIPDGCGVK                    | 1113.60 | 1113.60 | 0.00  | 0.86     | 2.E-19 |
| P27635 | RLIPDGCGVK                    | 1111.59 | 1113.60 | -2.01 | -1812.14 | 2.E-19 |
| P11021 | TFAPEEISAMVLTK                | 1535.79 | 1535.79 | 0.00  | -0.07    | 2.E-19 |
| Q02539 | SLVSKGTLVQTK                  | 1264.72 | 1259.74 | 4.98  | 3937.55  | 2.E-19 |
| Q02539 | SLVSKGTLVQTK                  | 1259.74 | 1259.74 | 0.00  | 0.33     | 2.E-19 |
| P11142 | SQIHDIVLVGGSTRIPK             | 1820.98 | 1819.03 | 1.95  | 1072.47  | 2.E-19 |
| P11142 | SQIHDIVLVGGSTRIPK             | 1819.03 | 1819.03 | 0.00  | -0.90    | 2.E-19 |
| O60812 | KSDVEAIFSK                    | 1122.59 | 1122.59 | 0.00  | -0.24    | 2.E-19 |
| P07355 | GRRAEDGSVIDYELIDQDARDLYDAGVK  | 3138.53 | 3138.52 | 0.01  | 2.10     | 2.E-19 |
| P62851 | IRGSLARAALQELLSK              | 1725.03 | 1725.03 | 0.00  | 1.30     | 2.E-19 |
| P62851 | IRGSLARAALQELLSK              | 1725.01 | 1725.03 | -0.02 | -11.23   | 2.E-19 |

|        |                           |         |         |      |        |        |
|--------|---------------------------|---------|---------|------|--------|--------|
| Q07021 | VEEQPELTSTPNFVVEVIK       | 2286.17 | 2286.16 | 0.01 | 2.42   | 2.E-19 |
| P08729 | LEAAIAEAEERGELALK         | 1811.97 | 1811.96 | 0.01 | 3.18   | 2.E-19 |
| Q9Y265 | TALALIAQELGSK             | 1384.79 | 1384.79 | 0.00 | 2.86   | 2.E-19 |
| P46781 | QVVNIPSFIVRLDSQK          | 1842.04 | 1842.04 | 0.00 | 0.32   | 2.E-19 |
| O43390 | LCDSYEIRPGK               | 1336.64 | 1336.64 | 0.00 | 0.51   | 2.E-19 |
| Q9Y265 | TALALIAQELGSK             | 1384.79 | 1384.79 | 0.00 | 1.85   | 2.E-19 |
| Q9NY12 | VDEIFGQLRDFYFSVK          | 1961.99 | 1961.99 | 0.00 | 0.37   | 2.E-19 |
| P22626 | IDTIEIITDRQSGK            | 1587.85 | 1587.85 | 0.00 | 1.65   | 2.E-19 |
| O15514 | ALIPSLEGRFEDEELQQILDDIQT  | 2899.49 | 2899.48 | 0.01 | 2.44   | 2.E-19 |
| P09651 | RSRGFGFVYATVEEVDAAMNARPHK | 2908.44 | 2908.44 | 0.00 | 0.55   | 2.E-19 |
| P56182 | LQDLAGGIFPEDEIPEK         | 1869.95 | 1869.94 | 0.01 | 2.97   | 2.E-19 |
| O75340 | AGVNFSEFTGVWK             | 1441.78 | 1440.70 | 1.08 | 748.22 | 2.E-19 |
| O75340 | AGVNFSEFTGVWK             | 1441.76 | 1440.70 | 1.06 | 732.55 | 2.E-19 |
| Q9UQE7 | AELGTDLLSQLSLEDQK         | 1858.95 | 1858.95 | 0.00 | 1.80   | 2.E-19 |
| P20700 | VDLENRCQSLTEDLEFRK        | 2251.09 | 2251.09 | 0.00 | 0.77   | 2.E-19 |

|        |                           |         |         |         |           |        |
|--------|---------------------------|---------|---------|---------|-----------|--------|
| P07355 | SLYYYIQDTK                | 1420.69 | 1420.69 | 0.00    | 0.39      | 2.E-19 |
| P08670 | FADLSEAAANRNDALRQAK       | 2104.04 | 2103.05 | 0.99    | 470.81    | 2.E-19 |
| P19338 | EVFEDAAEIRLVSK            | 1604.84 | 1604.84 | 0.00    | -0.09     | 2.E-19 |
| P23396 | RFGFPEGSVELYAEK           | 1727.85 | 1727.85 | 0.00    | 1.77      | 2.E-19 |
| P08729 | LEAAIAEAEERGELALK         | 1807.87 | 1811.96 | -4.09   | -2262.79  | 2.E-19 |
| Q9UQE7 | NDVMNLLESAGFSRSPYYIVK     | 2532.24 | 2516.24 | 16.00   | 6317.92   | 3.E-19 |
| P35908 | VRFLEQQNQVLQTK            | 1729.95 | 1729.95 | 0.00    | 1.10      | 3.E-19 |
| Q92841 | VLEEANQAINPK              | 1325.70 | 1324.70 | 1.00    | 757.67    | 3.E-19 |
| P11021 | ERIDTRNELESYAYSLK         | 2086.03 | 2086.03 | 0.00    | 0.35      | 3.E-19 |
| P23396 | KPLPDHVSIVEPK             | 1457.82 | 1457.82 | 0.00    | 0.70      | 3.E-19 |
| P62701 | GRFAVHRITPEEAK            | 1609.87 | 1609.87 | 0.00    | 1.03      | 3.E-19 |
| Q00839 | PYFPIPEEYTFIQNVPLEDRVRGPK | 3003.56 | 3003.55 | 0.01    | 1.97      | 3.E-19 |
| P06703 | (49)MACPLDQAIGLLVAIFHK    | 1921.05 | 2038.07 | -117.02 | -60913.80 | 3.E-19 |
| P62988 | ESTLHLVLRRLGG             | 1449.84 | 1449.84 | 0.00    | 0.37      | 3.E-19 |
| P50995 | TPVLFDIYEIK               | 1336.73 | 1336.73 | 0.00    | 2.52      | 3.E-19 |

|        |                                        |         |         |       |         |        |
|--------|----------------------------------------|---------|---------|-------|---------|--------|
| Q9UKV3 | VPEESVLPLVQK                           | 1336.81 | 1336.76 | 0.05  | 37.11   | 3.E-19 |
| Q9UKV3 | VPEESVLPLVQK                           | 1336.76 | 1336.76 | 0.00  | 1.51    | 3.E-19 |
| P08621 | TLFVARVNYDTTESK                        | 1747.82 | 1742.88 | 4.94  | 2827.63 | 3.E-19 |
| Q96QV6 | LLGGVTIAQGGVLPNIQAVLLPK                | 2270.37 | 2270.37 | 0.00  | 2.06    | 3.E-19 |
| O75340 | AGVNFSEFTGVWK                          | 1440.70 | 1440.70 | 0.00  | 0.74    | 3.E-19 |
| P09651 | IEVIEIMDRGSGK                          | 1546.80 | 1546.80 | 0.00  | 1.96    | 3.E-19 |
| Q12905 | ILPTLEAVAALGNK                         | 1408.83 | 1408.83 | 0.00  | -0.23   | 3.E-19 |
| P07910 | MESEGGADD(37)SAEEGDLLDDDDNEDRGDDQLELIK | 3805.48 | 3789.48 | 16.00 | 4203.39 | 3.E-19 |
| P02545 | RQNGDDPLLTYRFPPK                       | 1916.98 | 1915.99 | 0.99  | 514.14  | 4.E-19 |
| P02545 | AAYEAEELGDARK                          | 1292.64 | 1292.64 | 0.00  | 0.43    | 4.E-19 |
| P26447 | ELLTRELPSFLGK                          | 1503.83 | 1501.85 | 1.98  | 1318.83 | 4.E-19 |
| P22626 | RGFGFVTFDDHDPVDK                       | 1853.86 | 1850.86 | 3.00  | 1620.77 | 4.E-19 |
| P22626 | RGFGFVTFDDHDPVDK                       | 1850.86 | 1850.86 | 0.00  | -1.09   | 4.E-19 |
| P13010 | TDTLEDLFPTTK                           | 1382.68 | 1379.68 | 3.00  | 2170.56 | 4.E-19 |
| P13010 | TDTLEDLFPTTK                           | 1379.68 | 1379.68 | 0.00  | 0.87    | 4.E-19 |

|        |                      |         |         |       |          |        |
|--------|----------------------|---------|---------|-------|----------|--------|
| P26599 | NNQFQALLQYADPVSAQHAK | 2242.11 | 2242.11 | 0.00  | 1.76     | 4.E-19 |
| Q9Y310 | (51)SRSYNDELQFLEK    | 1669.80 | 1669.79 | 0.01  | 3.12     | 4.E-19 |
| P62277 | GLAPDLPEDLYHLIK      | 1692.91 | 1692.91 | 0.00  | 0.69     | 4.E-19 |
| P62277 | GLAPDLPEDLYHLIK      | 1692.88 | 1692.91 | -0.03 | -17.09   | 4.E-19 |
| P26447 | ELLTRELPSFLGK        | 1501.85 | 1501.85 | 0.00  | -0.66    | 4.E-19 |
| P26447 | ELLTRELPSFLGK        | 1501.83 | 1501.85 | -0.02 | -15.71   | 4.E-19 |
| P35908 | VRFLEQQNQVLQTK       | 1733.82 | 1729.95 | 3.87  | 2234.20  | 5.E-19 |
| Q9NWB6 | LAEEQLRIVEEQRK       | 1743.90 | 1739.95 | 3.95  | 2264.25  | 5.E-19 |
| Q14683 | TRLGQLDFEK           | 1321.74 | 1318.72 | 3.02  | 2288.12  | 5.E-19 |
| P08621 | TLFVARVNYDTTESK      | 1742.88 | 1742.88 | 0.00  | 0.35     | 5.E-19 |
| P09651 | IEVIEIMDRGSGK        | 1541.84 | 1546.80 | -4.96 | -3214.44 | 5.E-19 |
| P16403 | ERSGVSLAALK          | 1132.65 | 1129.65 | 3.00  | 2649.11  | 5.E-19 |
| P16403 | ERSGVSLAALK          | 1131.66 | 1129.65 | 2.01  | 1774.05  | 5.E-19 |
| P62851 | IRGSLARAALQELLSK     | 1725.03 | 1725.03 | 0.00  | 1.47     | 5.E-19 |
| P62851 | IRGSLARAALQELLSK     | 1725.01 | 1725.03 | -0.02 | -11.40   | 5.E-19 |

|        |                                        |         |         |       |          |        |
|--------|----------------------------------------|---------|---------|-------|----------|--------|
| P43243 | ITPENLPQILLQLK                         | 1618.97 | 1618.97 | 0.00  | 0.95     | 5.E-19 |
| P62906 | KYDAFLASESLIK                          | 1487.90 | 1483.79 | 4.11  | 2762.80  | 5.E-19 |
| P62906 | KYDAFLASESLIK                          | 1483.79 | 1483.79 | 0.00  | 1.00     | 5.E-19 |
| P08729 | LEAAIAEAEERGELALK                      | 1811.96 | 1811.96 | 0.00  | 2.63     | 5.E-19 |
| P07355 | DIISDTSGDFRK                           | 1356.68 | 1352.66 | 4.02  | 2960.56  | 6.E-19 |
| P16403 | ASGPPVSELITK                           | 1197.66 | 1197.66 | 0.00  | 0.86     | 6.E-19 |
| Q14683 | TRLGIQLDFEK                            | 1318.72 | 1318.72 | 0.00  | 2.07     | 6.E-19 |
| Q14683 | TRLGIQLDFEK                            | 1316.64 | 1318.72 | -2.08 | -1578.39 | 6.E-19 |
| Q13813 | QETFDAGLQAFQQEGIANITALK                | 2492.25 | 2492.25 | 0.00  | 1.86     | 6.E-19 |
| P19338 | VEGTEPTTAFNLFVGNLNFNK                  | 2311.15 | 2311.15 | 0.00  | -0.01    | 6.E-19 |
| P16403 | ERSGVSLAALK                            | 1129.65 | 1129.65 | 0.00  | 0.00     | 6.E-19 |
| P16403 | ERSGVSLAALK                            | 1129.64 | 1129.65 | -0.01 | -11.50   | 6.E-19 |
| Q08211 | AIEPPPLDAVIEAEHTLRELDALDANDELTPGLRILAK | 4118.23 | 4118.19 | 0.04  | 8.66     | 6.E-19 |
| O75526 | SRGFVTFESPADAK                         | 1728.85 | 1728.85 | 0.00  | 2.66     | 7.E-19 |
| P13010 | TDTLEDLFPTTK                           | 1382.82 | 1379.68 | 3.14  | 2272.52  | 7.E-19 |

|        |                                    |         |         |         |           |        |
|--------|------------------------------------|---------|---------|---------|-----------|--------|
| P13010 | TDTLEDLFPTTK                       | 1377.81 | 1379.68 | -1.87   | -1360.64  | 7.E-19 |
| P07355 | DIISDTSGDFRK                       | 1353.64 | 1352.66 | 0.98    | 727.60    | 7.E-19 |
| P07355 | DIISDTSGDFRK                       | 1352.78 | 1352.66 | 0.12    | 89.97     | 7.E-19 |
| P07355 | DIISDTSGDFRK                       | 1352.66 | 1352.66 | 0.00    | 0.90      | 7.E-19 |
| P23396 | RFGFPEGSVELYAEK                    | 1729.86 | 1727.85 | 2.01    | 1161.80   | 7.E-19 |
| Q96DI7 | TVAVWDSETGERVK                     | 1575.79 | 1575.79 | 0.00    | -0.03     | 7.E-19 |
| Q9NWB6 | LAEEQLRIVEEQRK                     | 1739.95 | 1739.95 | 0.00    | 0.42      | 7.E-19 |
| P22626 | IDTIEIITDRQSGK                     | 1587.85 | 1587.85 | 0.00    | 2.60      | 8.E-19 |
| Q562L5 | (48)KIWHHTFYNELRVAPEEHPVLLTEAPLNPK | 3506.82 | 3619.89 | -113.07 | -32244.10 | 8.E-19 |
| O60506 | EFNEDGALAVLQQFK                    | 1707.85 | 1707.85 | 0.00    | 0.31      | 8.E-19 |
| P67809 | GAEAAANVTGPGGVPVQGSK               | 1694.86 | 1694.86 | 0.00    | 2.06      | 8.E-19 |
| P67809 | GAEAAANVTGPGGVPVQGSK               | 1694.83 | 1694.86 | -0.03   | -17.41    | 8.E-19 |
| Q07020 | SQDIYLRLLVK                        | 1346.79 | 1346.79 | 0.00    | 1.59      | 8.E-19 |
| P16403 | ASGPPVSELITK                       | 1192.67 | 1197.66 | -4.99   | -4184.71  | 8.E-19 |
| O75400 | LAFNSLLEK                          | 1033.58 | 1033.58 | 0.00    | 1.19      | 9.E-19 |

|        |                                        |         |         |       |          |        |
|--------|----------------------------------------|---------|---------|-------|----------|--------|
| O75400 | LAFNSLLEK                              | 1033.57 | 1033.58 | -0.01 | -10.23   | 9.E-19 |
| P07910 | MESEGGADD(37)SAEEGDLLDDDDNEDRGDDQLELIK | 3805.48 | 3789.48 | 16.00 | 4203.57  | 9.E-19 |
| P07910 | MESEGGADD(37)SAEEGDLLDDDDNEDRGDDQLELIK | 3805.37 | 3789.48 | 15.89 | 4175.62  | 9.E-19 |
| P09651 | IEVIEIMTRGSGK                          | 1548.81 | 1546.80 | 2.01  | 1297.21  | 9.E-19 |
| Q14683 | TRLGIQLDFEK                            | 1321.74 | 1318.72 | 3.02  | 2288.20  | 9.E-19 |
| Q9BXY0 | ALIAAQLDNAIEK                          | 1369.80 | 1368.76 | 1.04  | 762.34   | 9.E-19 |
| Q9BXY0 | ALIAAQLDNAIEK                          | 1368.76 | 1368.76 | 0.00  | 2.96     | 9.E-19 |
| Q9BXY0 | ALIAAQLDNAIEK                          | 1367.71 | 1368.76 | -1.05 | -770.37  | 9.E-19 |
| Q04695 | VRALEEANTELEVK                         | 1599.86 | 1599.85 | 0.01  | 3.15     | 9.E-19 |
| P35908 | VRFLEQQNQVLQTK                         | 1730.96 | 1729.95 | 1.01  | 580.72   | 9.E-19 |
| P02545 | NIYSEELRETK                            | 1380.69 | 1380.69 | 0.00  | 0.66     | 9.E-19 |
| P02545 | NIYSEELRETK                            | 1376.69 | 1380.69 | -4.00 | -2909.02 | 9.E-19 |
| P04083 | DITSDTSGDFRNALLSLAK                    | 2023.03 | 2023.02 | 0.01  | 3.38     | 1.E-18 |
| Q96FV9 | RTAPEDFLGK                             | 1132.59 | 1132.59 | 0.00  | 0.93     | 1.E-18 |
| P05388 | IIQLDDYPK                              | 1216.67 | 1216.67 | 0.00  | 1.55     | 1.E-18 |



|        |                             |         |         |       |         |        |
|--------|-----------------------------|---------|---------|-------|---------|--------|
| P38919 | (41)ATTATMATSGSARK          | 1394.68 | 1394.68 | 0.00  | 2.72    | 1.E-18 |
| P50995 | TPVLFDIYEIK                 | 1339.80 | 1336.73 | 3.07  | 2292.19 | 1.E-18 |
| P50995 | TPVLFDIYEIK                 | 1336.73 | 1336.73 | 0.00  | 2.08    | 1.E-18 |
| Q17R45 | ALVRLALEAEK                 | 1211.72 | 1211.72 | 0.00  | 0.80    | 1.E-18 |
| P04792 | LATQSNEITIPVTFESRAQLGGPEAAK | 2837.36 | 2827.47 | 9.89  | 3486.53 | 1.E-18 |
| Q9NPA8 | GLEHVTVDLVAEITPK            | 1834.97 | 1834.97 | 0.00  | 0.87    | 1.E-18 |
| Q15029 | TATITEPRGNEEAQIFRPLK        | 2270.20 | 2270.20 | 0.00  | 1.83    | 1.E-18 |
| Q02539 | SLVSKGTLVQTK                | 1264.72 | 1259.74 | 4.98  | 3937.55 | 1.E-18 |
| Q02539 | SLVSKGTLVQTK                | 1264.62 | 1259.74 | 4.88  | 3859.57 | 1.E-18 |
| P23396 | KPLPDHVSIVEPKDEILPTTPISEQK  | 2909.57 | 2909.57 | 0.00  | -0.83   | 1.E-18 |
| Q14683 | TRLGIQLDFEK                 | 1318.72 | 1318.72 | 0.00  | 1.38    | 1.E-18 |
| Q08211 | YPSPFFVFGEK                 | 1316.64 | 1316.64 | 0.00  | 1.37    | 1.E-18 |
| Q8IXQ4 | (41)ARDLIGPALPPGFK          | 1493.85 | 1492.84 | 1.01  | 673.98  | 1.E-18 |
| Q02539 | ALAAAGYDVEK                 | 1106.56 | 1106.56 | 0.00  | -0.14   | 1.E-18 |
| Q02539 | ALAAAGYDVEK                 | 1106.55 | 1106.56 | -0.01 | -11.17  | 1.E-18 |

|        |                                        |         |         |       |          |        |
|--------|----------------------------------------|---------|---------|-------|----------|--------|
| O60506 | ALLERTGYTLDVTTGQRK                     | 2025.07 | 2021.09 | 3.98  | 1967.72  | 1.E-18 |
| O60506 | ALLERTGYTLDVTTGQRK                     | 2021.09 | 2021.09 | 0.00  | 0.83     | 1.E-18 |
| P60903 | EFPGFLENQK                             | 1207.59 | 1207.59 | 0.00  | -0.43    | 1.E-18 |
| P60903 | EFPGFLENQK                             | 1207.57 | 1207.59 | -0.02 | -12.68   | 1.E-18 |
| P60903 | EFPGFLENQK                             | 1207.56 | 1207.59 | -0.03 | -21.46   | 1.E-18 |
| A6NI71 | ALPLIVGAQLIHADK                        | 1557.92 | 1557.92 | 0.00  | -1.49    | 1.E-18 |
| A6NI71 | ALPLIVGAQLIHADK                        | 1557.89 | 1557.92 | -0.03 | -17.40   | 1.E-18 |
| P07910 | MESEGGADD(37)SAEEGDLLDDDDNEDRGDDQLELIK | 3789.47 | 3789.48 | -0.01 | -1.53    | 1.E-18 |
| P62987 | IIEPSLRQLAQK                           | 1390.82 | 1394.82 | -4.00 | -2872.55 | 1.E-18 |
| P07910 | LKGDDLQAIKK                            | 1227.72 | 1227.72 | 0.00  | -0.04    | 1.E-18 |
| O75400 | ELEDLEGYQNTIVAGSLITK                   | 2192.13 | 2192.12 | 0.01  | 3.05     | 1.E-18 |
| P26447 | ELLTRELPSFLGK                          | 1529.85 | 1501.85 | 28.00 | 18299.40 | 1.E-18 |
| P62988 | MQIFVKTLTGKTITLEVEPSDTIENVK            | 3049.63 | 3033.63 | 16.00 | 5245.02  | 2.E-18 |
| P62701 | VNDTIQIDLETGK                          | 1455.74 | 1444.74 | 11.00 | 7554.30  | 2.E-18 |
| P62701 | VNDTIQIDLETGK                          | 1450.75 | 1444.74 | 6.01  | 4142.47  | 2.E-18 |

|        |                                   |         |         |       |          |        |
|--------|-----------------------------------|---------|---------|-------|----------|--------|
| P05388 | AIRGHLENNPALEK                    | 1560.84 | 1560.84 | 0.00  | 1.02     | 2.E-18 |
| O75400 | LAFNSLLEK                         | 1030.61 | 1033.58 | -2.97 | -2878.06 | 2.E-18 |
| O75400 | LAFNSLLEK                         | 1030.60 | 1033.58 | -2.98 | -2889.45 | 2.E-18 |
| P50995 | TPVLFDIYEIK                       | 1340.78 | 1336.73 | 4.05  | 3017.12  | 2.E-18 |
| O43660 | QYPANQQQEVEYFVAGTHPYPPGPGVALTADTK | 3501.70 | 3501.68 | 0.02  | 5.53     | 2.E-18 |
| P60903 | EFPGFLENQK                        | 1207.59 | 1207.59 | 0.00  | -0.43    | 2.E-18 |
| P60903 | EFPGFLENQK                        | 1207.57 | 1207.59 | -0.02 | -12.85   | 2.E-18 |
| P60903 | EFPGFLENQK                        | 1207.55 | 1207.59 | -0.04 | -29.41   | 2.E-18 |
| P22626 | IDTIEIITDRQSGK                    | 1587.85 | 1587.85 | 0.00  | 2.47     | 2.E-18 |
| P22626 | IDTIEIITDRQSGK                    | 1587.77 | 1587.85 | -0.08 | -51.19   | 2.E-18 |
| P62826 | PFLWLARK                          | 1029.61 | 1029.61 | 0.00  | 1.02     | 2.E-18 |
| Q86V81 | LLVSNLDFGVSDADIQELFAEFGTLK        | 2840.45 | 2840.45 | 0.00  | -1.14    | 2.E-18 |
| P22626 | IDTIEIITDRQSGK                    | 1587.85 | 1587.85 | 0.00  | 2.09     | 2.E-18 |
| P22626 | IDTIEIITDRQSGK                    | 1587.77 | 1587.85 | -0.08 | -51.38   | 2.E-18 |
| A6NIM7 | TIAECLAEELINAAK                   | 1648.99 | 1644.84 | 4.15  | 2516.61  | 2.E-18 |

|        |                              |         |         |       |         |        |
|--------|------------------------------|---------|---------|-------|---------|--------|
| A6NIM7 | TIAECLAEELINAAK              | 1648.96 | 1644.84 | 4.12  | 2497.61 | 2.E-18 |
| P05388 | LLPHIRGNVGFVFTK              | 1696.98 | 1696.98 | 0.00  | 1.68    | 2.E-18 |
| P05388 | LLPHIRGNVGFVFTK              | 1696.85 | 1696.98 | -0.13 | -76.76  | 2.E-18 |
| O75526 | SRGFVTFESPADAK               | 1728.85 | 1728.85 | 0.00  | 2.66    | 2.E-18 |
| P62987 | IIEPSLRQLAQK                 | 1394.82 | 1394.82 | 0.00  | 0.63    | 2.E-18 |
| O43390 | YGGPPPDSVYSGVQPGIGTEVFGK     | 2506.18 | 2506.24 | -0.06 | -25.83  | 2.E-18 |
| Q15061 | LILLITQVTASEK                | 1427.86 | 1427.86 | 0.00  | -0.14   | 2.E-18 |
| Q13523 | LDDLALLEDEK                  | 1385.73 | 1385.73 | 0.00  | 1.13    | 2.E-18 |
| Q8TDN6 | FLVQNIHTLAELK                | 1525.87 | 1524.87 | 1.00  | 657.08  | 2.E-18 |
| P35908 | VRFLEQQNQVLQTK               | 1729.96 | 1729.95 | 0.01  | 3.18    | 2.E-18 |
| Q13421 | LRTDAVLPLTVAEVQK             | 1752.02 | 1752.01 | 0.01  | 3.31    | 2.E-18 |
| P05787 | LSELEAALQRAK                 | 1327.75 | 1327.75 | 0.00  | 2.84    | 2.E-18 |
| Q3BDU5 | LVRSVTVVEDDEDGDDLLHHHHVSGSRR | 3422.62 | 3422.62 | 0.00  | 0.80    | 2.E-18 |
| P26373 | LATQLTGPVMPVRNVYK            | 1889.93 | 1886.04 | 3.89  | 2056.71 | 2.E-18 |
| O95816 | HATRIIDEVVNK                 | 1393.77 | 1393.77 | 0.00  | 0.48    | 2.E-18 |

|        |                           |         |         |       |         |        |
|--------|---------------------------|---------|---------|-------|---------|--------|
| O95816 | HATRIIDEVVNK              | 1393.75 | 1393.77 | -0.02 | -14.95  | 2.E-18 |
| Q9NWH9 | (41)AAATGAVAASAASGQAEK    | 1629.85 | 1629.80 | 0.05  | 29.75   | 2.E-18 |
| Q9NWH9 | (41)AAATGAVAASAASGQAEK    | 1629.80 | 1629.80 | 0.00  | 1.95    | 2.E-18 |
| P62987 | IIEPSLRQLAQK              | 1394.80 | 1394.82 | -0.02 | -15.29  | 2.E-18 |
| P16403 | ERSGVSLAALK               | 1131.66 | 1129.65 | 2.01  | 1773.96 | 2.E-18 |
| P02545 | NIYSEELRETK               | 1380.69 | 1380.69 | 0.00  | 2.25    | 2.E-18 |
| P18124 | RIALTDNALIARSLGK          | 1711.01 | 1711.01 | 0.00  | 1.74    | 2.E-18 |
| O43390 | YGGPPPDSVYSGVQPGIGTEVFVGK | 2506.24 | 2506.24 | 0.00  | 1.38    | 2.E-18 |
| P05783 | GLQAQIASSGLTVEVDAPK       | 1883.01 | 1883.00 | 0.01  | 3.74    | 2.E-18 |
| P02545 | LRDLEDSLARERDTSRRLAEK     | 2641.43 | 2641.43 | 0.00  | -0.88   | 2.E-18 |
| P09661 | NAIANASTLAEVERLK          | 1698.93 | 1698.93 | 0.00  | 1.05    | 3.E-18 |
| Q9NWH9 | (41)AAATGAVAASAASGQAEK    | 1629.77 | 1629.80 | -0.03 | -15.72  | 3.E-18 |
| Q9NWH9 | (41)AAATGAVAASAASGQAEK    | 1629.75 | 1629.80 | -0.05 | -31.12  | 3.E-18 |
| P16403 | ERSGVSLAALK               | 1129.65 | 1129.65 | 0.00  | -0.17   | 3.E-18 |
| P16403 | ERSGVSLAALK               | 1129.64 | 1129.65 | -0.01 | -11.42  | 3.E-18 |

|        |                                |         |         |       |          |        |
|--------|--------------------------------|---------|---------|-------|----------|--------|
| P16403 | ERSGVSLAALK                    | 1128.63 | 1129.65 | -1.02 | -904.55  | 3.E-18 |
| O75533 | DLLPRLTPILK                    | 1282.76 | 1277.81 | 4.95  | 3856.88  | 3.E-18 |
| Q02539 | SLVSKGTLVQTK                   | 1259.74 | 1259.74 | 0.00  | 1.04     | 3.E-18 |
| Q8IVT2 | VNRIPPDAYQPYLSPGTPQLEFSAFGAFGK | 3266.64 | 3266.64 | 0.00  | -0.45    | 3.E-18 |
| P56182 | VGAEELTADQNLK                  | 1387.69 | 1386.70 | 0.99  | 711.73   | 3.E-18 |
| Q08211 | NFLYAWCGK                      | 1160.64 | 1157.53 | 3.11  | 2678.53  | 3.E-18 |
| Q08211 | NFLYAWCGK                      | 1157.53 | 1157.53 | 0.00  | 1.39     | 3.E-18 |
| Q08211 | NFLYAWCGK                      | 1154.60 | 1157.53 | -2.93 | -2541.74 | 3.E-18 |
| Q04695 | KEPVTTRQVRTIVEEVQDGK           | 2311.26 | 2311.25 | 0.01  | 2.32     | 3.E-18 |
| P08107 | AQIHDLVLVGGSTRIPK              | 1803.04 | 1803.04 | 0.00  | 0.60     | 3.E-18 |
| P61254 | FNPFVTSDRSK                    | 1296.65 | 1296.65 | 0.00  | 1.36     | 3.E-18 |
| P62841 | HGRPGIGATHSSRFIPLK             | 1930.06 | 1930.06 | 0.00  | 0.57     | 3.E-18 |
| P62841 | HGRPGIGATHSSRFIPLK             | 1930.03 | 1930.06 | -0.03 | -13.27   | 3.E-18 |
| P05783 | GLQAQIASSGLTVEVDAPK            | 1883.01 | 1883.00 | 0.01  | 3.52     | 4.E-18 |
| Q09161 | DGVLEEQUIERLQEK                | 1684.86 | 1684.86 | 0.00  | -0.80    | 4.E-18 |

|        |                               |         |         |       |          |        |
|--------|-------------------------------|---------|---------|-------|----------|--------|
| P13010 | TDTLEDLFPTTK                  | 1382.82 | 1379.68 | 3.14  | 2272.52  | 4.E-18 |
| P13010 | TDTLEDLFPTTK                  | 1382.68 | 1379.68 | 3.00  | 2170.99  | 4.E-18 |
| Q9NQT4 | EARAVLTFALDSVERK              | 1803.98 | 1803.98 | 0.00  | 1.08     | 4.E-18 |
| Q15459 | VQAQVIQETIVPK                 | 1454.80 | 1451.83 | 2.97  | 2038.32  | 4.E-18 |
| Q15459 | VQAQVIQETIVPK                 | 1451.83 | 1451.83 | 0.00  | 1.06     | 4.E-18 |
| Q15459 | VQAQVIQETIVPK                 | 1450.74 | 1451.83 | -1.09 | -750.82  | 4.E-18 |
| P08758 | (41)AQVLRGTVTDFPGFDERADAETLRK | 2833.44 | 2833.44 | 0.00  | 1.08     | 4.E-18 |
| P08758 | (41)AQVLRGTVTDFPGFDERADAETLRK | 2833.39 | 2833.44 | -0.05 | -19.29   | 4.E-18 |
| P14136 | VRFLEQQNK                     | 1160.63 | 1160.63 | 0.00  | 0.09     | 4.E-18 |
| Q04695 | KEPVTTRQVRTIVEEVQDGK          | 2311.22 | 2311.25 | -0.03 | -14.64   | 4.E-18 |
| P61978 | IILDLISESPIK                  | 1339.80 | 1339.80 | 0.00  | 0.05     | 4.E-18 |
| P61978 | IILDLISESPIK                  | 1339.78 | 1339.80 | -0.02 | -12.71   | 4.E-18 |
| P61978 | IILDLISESPIK                  | 1339.77 | 1339.80 | -0.03 | -22.49   | 4.E-18 |
| P61978 | IILDLISESPIK                  | 1336.73 | 1339.80 | -3.07 | -2293.83 | 4.E-18 |
| P09661 | NAIANASTLAEVERLK              | 1698.93 | 1698.93 | 0.00  | 0.29     | 4.E-18 |

|        |                          |         |         |       |        |        |
|--------|--------------------------|---------|---------|-------|--------|--------|
| Q9NYF8 | DRLLASTLVHSVK            | 1437.83 | 1437.83 | 0.00  | 1.51   | 4.E-18 |
| P60709 | ILTERGYSFTTTAEREIVRDIK   | 2597.39 | 2597.38 | 0.01  | 2.36   | 5.E-18 |
| Q14444 | TVLELQYVLDK              | 1319.73 | 1319.73 | 0.00  | 1.10   | 5.E-18 |
| Q9UKV3 | VPEESVLPLVQK             | 1336.81 | 1336.76 | 0.05  | 36.89  | 5.E-18 |
| Q9UKV3 | VPEESVLPLVQK             | 1336.76 | 1336.76 | 0.00  | 1.43   | 5.E-18 |
| P07355 | DIISDTSGDFRK             | 1353.70 | 1352.66 | 1.04  | 767.91 | 5.E-18 |
| Q92499 | TGAFSIPVIQIVYETLK        | 1878.05 | 1878.05 | 0.00  | 1.00   | 5.E-18 |
| Q9NQT4 | ATLEVILRPK               | 1138.71 | 1138.71 | 0.00  | 0.56   | 5.E-18 |
| O75955 | AAYDIEVNTRRAQADLAYQLQVAK | 2706.41 | 2706.41 | 0.00  | 1.82   | 5.E-18 |
| P07910 | LKGDDLQAIKK              | 1227.67 | 1227.72 | -0.05 | -36.94 | 5.E-18 |
| Q99848 | PGLNVVLEGPK              | 1121.64 | 1121.64 | 0.00  | 0.42   | 5.E-18 |
| Q99848 | PGLNVVLEGPK              | 1121.63 | 1121.64 | -0.01 | -10.01 | 5.E-18 |
| Q04695 | EPVTTRQVRTIVEEVQDGK      | 2183.16 | 2183.15 | 0.01  | 2.58   | 5.E-18 |
| P35659 | NVGQFSGFPFEK             | 1355.65 | 1355.65 | 0.00  | 2.60   | 5.E-18 |
| Q12905 | LDPELHLDIK               | 1191.65 | 1191.65 | 0.00  | 2.51   | 5.E-18 |



|        |                      |         |         |       |          |        |
|--------|----------------------|---------|---------|-------|----------|--------|
| Q12905 | LDPELHLDIK           | 1188.61 | 1191.65 | -3.04 | -2558.12 | 5.E-18 |
| Q9NWB6 | LIEEETARRVEELVAK     | 1884.03 | 1884.03 | 0.00  | -0.79    | 5.E-18 |
| Q5T6W2 | IIPBLEEYQHYK         | 1530.83 | 1532.79 | -1.96 | -1278.57 | 5.E-18 |
| Q09161 | DGVLEEQIERLQEK       | 1687.87 | 1684.86 | 3.01  | 1781.57  | 6.E-18 |
| P13010 | TDLTLEDLFPPTK        | 1379.68 | 1379.68 | 0.00  | 0.72     | 6.E-18 |
| P13010 | TDLTLEDLFPPTK        | 1377.81 | 1379.68 | -1.87 | -1360.64 | 6.E-18 |
| P09661 | NAIANASTLAEVERLK     | 1696.80 | 1698.93 | -2.13 | -1254.84 | 6.E-18 |
| O60506 | VLFRNLANTVTEEILEK    | 2087.16 | 2087.16 | 0.00  | -0.34    | 6.E-18 |
| Q12905 | PAPDETSFSEALLK       | 1507.78 | 1503.75 | 4.03  | 2672.71  | 6.E-18 |
| P09661 | NAIANASTLAEVERLK     | 1698.93 | 1698.93 | 0.00  | 0.76     | 6.E-18 |
| P04264 | SLNNQFASFIDK         | 1382.68 | 1382.68 | 0.00  | 2.95     | 6.E-18 |
| P04264 | SLNNQFASFIDK         | 1380.77 | 1382.68 | -1.91 | -1381.41 | 6.E-18 |
| Q01130 | (51)SYGRPPPDVEGMTSLK | 1774.86 | 1774.86 | 0.00  | 0.28     | 6.E-18 |
| P07910 | LKGDDLQAIKK          | 1227.72 | 1227.72 | 0.00  | 0.61     | 6.E-18 |
| P07910 | LKGDDLQAIKK          | 1227.70 | 1227.72 | -0.02 | -12.43   | 6.E-18 |

|        |                                      |         |         |       |         |        |
|--------|--------------------------------------|---------|---------|-------|---------|--------|
| Q9NZB2 | PVAPQVPSPPGGAPGQGPYPYSLSEPAPLTLDTSGK | 3431.73 | 3431.72 | 0.01  | 2.82    | 7.E-18 |
| O60506 | ALLERTGYTLDVTTGQRK                   | 2021.09 | 2021.09 | 0.00  | 0.28    | 7.E-18 |
| P07355 | DIISDTSGDFRK                         | 1352.78 | 1352.66 | 0.12  | 90.86   | 7.E-18 |
| P07355 | DIISDTSGDFRK                         | 1352.66 | 1352.66 | 0.00  | 2.08    | 7.E-18 |
| O43818 | LYLEQLRQQEEEEK                       | 1704.87 | 1704.87 | 0.00  | 2.85    | 7.E-18 |
| P09661 | TFNPGAGLPTDKK                        | 1344.70 | 1344.70 | 0.00  | 1.54    | 7.E-18 |
| Q14683 | LVIDVIRYEPPIHK                       | 1690.98 | 1690.98 | 0.00  | 1.43    | 7.E-18 |
| Q14683 | LVIDVIRYEPPIHK                       | 1690.96 | 1690.98 | -0.02 | -12.23  | 7.E-18 |
| Q9NR30 | DLIAQARTGTGK                         | 1238.66 | 1229.67 | 8.99  | 7258.09 | 7.E-18 |
| Q9NR30 | DLIAQARTGTGK                         | 1236.75 | 1229.67 | 7.08  | 5727.42 | 7.E-18 |
| Q9NR30 | DLIAQARTGTGK                         | 1235.65 | 1229.67 | 5.98  | 4838.28 | 7.E-18 |
| A6NI71 | (41)ATDTSQGELVHPK                    | 1423.69 | 1423.69 | 0.00  | 0.82    | 7.E-18 |
| Q8IYB3 | VNLEVIKPWITK                         | 1438.85 | 1438.85 | 0.00  | 1.77    | 7.E-18 |
| Q5T6W2 | IIPBLEEYQHYK                         | 1535.79 | 1532.79 | 3.00  | 1952.70 | 7.E-18 |
| Q5T6W2 | IIPBLEEYQHYK                         | 1532.79 | 1532.79 | 0.00  | 2.63    | 7.E-18 |

|        |                            |         |         |      |         |        |
|--------|----------------------------|---------|---------|------|---------|--------|
| Q09028 | TVALWDLRNLK                | 1331.75 | 1327.76 | 3.99 | 2993.96 | 8.E-18 |
| Q09028 | TVALWDLRNLK                | 1327.76 | 1327.76 | 0.00 | 2.87    | 8.E-18 |
| Q86V81 | LLVSNLDFGVSDADIQELFAEFGTLK | 2840.45 | 2840.45 | 0.00 | -1.24   | 8.E-18 |
| Q9UMS4 | VAHPIRPKPPSATSIPAILK       | 2092.25 | 2092.25 | 0.00 | 1.33    | 8.E-18 |
| Q14683 | EQRGEPETFLPLDYLEVKPTDEK    | 2734.36 | 2732.35 | 2.01 | 733.83  | 8.E-18 |
| O14979 | VFVGGLSPDTSEEQIK           | 1704.86 | 1704.86 | 0.00 | 2.29    | 9.E-18 |
| P07355 | SYSPYDMLESIRK              | 1587.85 | 1587.76 | 0.09 | 56.75   | 9.E-18 |
| P07355 | SYSPYDMLESIRK              | 1587.76 | 1587.76 | 0.00 | 2.40    | 9.E-18 |
| Q92841 | APILIATDVASRGLDVEDVK       | 2081.14 | 2081.14 | 0.00 | 0.83    | 9.E-18 |
| Q8IVT2 | GAPHSSPARGTPAGTTPGASQAPK   | 2200.10 | 2200.10 | 0.00 | 0.52    | 9.E-18 |
| P20073 | GFGTDEQAIVDVVANRSNDQRQK    | 2546.26 | 2546.25 | 0.01 | 2.79    | 9.E-18 |
| P26599 | LPIDVTEGEVISLGLPFGK        | 1983.09 | 1983.09 | 0.00 | 1.87    | 9.E-18 |
| Q12906 | VADNLAIQLAAVTEDK           | 1671.80 | 1669.89 | 1.91 | 1142.83 | 1.E-17 |
| P61247 | LMELHGEGLSSSGK             | 1334.69 | 1330.62 | 4.07 | 3048.21 | 1.E-17 |
| P61247 | LMELHGEGLSSSGK             | 1334.67 | 1330.62 | 4.05 | 3032.22 | 1.E-17 |

|        |                      |         |         |      |         |        |
|--------|----------------------|---------|---------|------|---------|--------|
| Q13813 | LLVGSEDYGRDLTGVQNLRK | 2237.18 | 2232.19 | 4.99 | 2229.15 | 1.E-17 |
| Q13813 | LLVGSEDYGRDLTGVQNLRK | 2232.19 | 2232.19 | 0.00 | 0.67    | 1.E-17 |
| P50995 | TPVLFDIYEIK          | 1340.79 | 1336.73 | 4.06 | 3025.08 | 1.E-17 |
| P50995 | TPVLFDIYEIK          | 1339.80 | 1336.73 | 3.07 | 2292.12 | 1.E-17 |
| P50995 | TPVLFDIYEIK          | 1336.73 | 1336.73 | 0.00 | 2.15    | 1.E-17 |
| P49736 | VAVGELTDEDVK         | 1273.64 | 1273.64 | 0.00 | 1.94    | 1.E-17 |
| Q9NR30 | DLIAQARTGTGK         | 1229.67 | 1229.67 | 0.00 | 0.43    | 1.E-17 |
| Q9Y230 | EYQDAFLFNEK          | 1515.72 | 1515.72 | 0.00 | 2.48    | 1.E-17 |
| P08621 | TLFVARVNYDTTESK      | 1747.82 | 1742.88 | 4.94 | 2828.14 | 1.E-17 |
| Q96GM8 | RALLNLPGTQTSGEAK     | 1656.79 | 1654.90 | 1.89 | 1140.15 | 1.E-17 |
| Q96GM8 | RALLNLPGTQTSGEAK     | 1654.90 | 1654.90 | 0.00 | 2.78    | 1.E-17 |
| Q12905 | PAPDETSFSEALLK       | 1503.75 | 1503.75 | 0.00 | 2.89    | 1.E-17 |
| Q12905 | PAPDETSFSEALLK       | 1507.78 | 1503.75 | 4.03 | 2672.31 | 1.E-17 |
| P61247 | LMELHGEHSSSGK        | 1334.69 | 1330.62 | 4.07 | 3048.28 | 1.E-17 |
| Q99829 | TLQLEYRFETVQK        | 1653.87 | 1653.87 | 0.00 | 2.78    | 1.E-17 |

|        |                            |         |         |       |          |        |
|--------|----------------------------|---------|---------|-------|----------|--------|
| Q9NR30 | DLIAQARTGTGK               | 1227.67 | 1229.67 | -2.00 | -1628.18 | 1.E-17 |
| P20700 | LLEGEEERLK                 | 1214.65 | 1214.65 | 0.00  | 2.28     | 1.E-17 |
| P20700 | LLEGEEERLK                 | 1214.55 | 1214.65 | -0.10 | -78.99   | 1.E-17 |
| Q9NR30 | GRGVTFLLPIQAK              | 1434.79 | 1432.82 | 1.97  | 1370.70  | 1.E-17 |
| Q9NR30 | GRGVTFLLPIQAK              | 1432.82 | 1432.82 | 0.00  | -0.93    | 1.E-17 |
| P62701 | GIPHLVTHDARTIRYDPLIK       | 2411.34 | 2411.34 | 0.00  | 0.58     | 1.E-17 |
| Q9NVP1 | VPLSEFDFSWSK               | 1440.69 | 1440.69 | 0.00  | 0.14     | 1.E-17 |
| P20073 | GFGTDEQAIVDVVANRSNDQRQK    | 2546.26 | 2546.25 | 0.01  | 2.51     | 1.E-17 |
| P52597 | HSGPNSADSANDGFVRLRGLPFGCTK | 2773.35 | 2759.32 | 14.03 | 5058.70  | 1.E-17 |
| P52597 | HSGPNSADSANDGFVRLRGLPFGCTK | 2762.33 | 2759.32 | 3.01  | 1091.12  | 1.E-17 |
| Q14254 | MALVLEALPQIAAK             | 1466.85 | 1466.85 | 0.00  | 2.77     | 1.E-17 |
| O00148 | LTLHGLQYYVK                | 1461.80 | 1461.80 | 0.00  | 1.93     | 2.E-17 |
| P61247 | LMELHGEQSSSGK              | 1330.72 | 1330.62 | 0.10  | 74.78    | 2.E-17 |
| P61247 | LMELHGEQSSSGK              | 1330.62 | 1330.62 | 0.00  | 0.68     | 2.E-17 |
| P61247 | LMELHGEQSSSGK              | 1330.72 | 1330.62 | 0.10  | 75.98    | 2.E-17 |

|        |                           |         |         |       |         |        |
|--------|---------------------------|---------|---------|-------|---------|--------|
| P61247 | LMELHGE GSSSGK            | 1330.66 | 1330.62 | 0.04  | 31.42   | 2.E-17 |
| P61247 | LMELHGE GSSSGK            | 1330.62 | 1330.62 | 0.00  | 0.83    | 2.E-17 |
| Q04695 | DAEDWFFSK                 | 1143.49 | 1143.49 | 0.00  | 1.43    | 2.E-17 |
| Q04695 | DAEDWFFSK                 | 1143.48 | 1143.49 | -0.01 | -9.76   | 2.E-17 |
| P26373 | LATQLTGPVMPVRNVYK         | 1886.04 | 1886.04 | 0.00  | 1.24    | 2.E-17 |
| O75533 | DLLPRLTPILK               | 1277.81 | 1277.81 | 0.00  | 1.90    | 2.E-17 |
| O94776 | LNPADAPNPVVFVATK          | 1651.89 | 1651.89 | 0.00  | 0.96    | 2.E-17 |
| Q9UQE7 | AELGTDLLSQLSLEDQK         | 1858.95 | 1858.95 | 0.00  | 2.07    | 2.E-17 |
| P17676 | VLELTAENERLQK             | 1541.84 | 1541.84 | 0.00  | 0.39    | 2.E-17 |
| P08107 | AQIHDLVLVGGSTRIPK         | 1803.04 | 1803.04 | 0.00  | 1.04    | 2.E-17 |
| Q12905 | PAPDETSFSEALLK            | 1503.75 | 1503.75 | 0.00  | 2.76    | 2.E-17 |
| P02545 | AGQVVTIWAAGAGATHSPPTDLVWK | 2533.32 | 2532.31 | 1.01  | 397.17  | 2.E-17 |
| P05783 | GLQAQIASSGLTVEVDAPK       | 1884.00 | 1883.00 | 1.00  | 531.86  | 2.E-17 |
| P62906 | KYDAFLASESLIK             | 1483.79 | 1483.79 | 0.00  | 0.66    | 2.E-17 |
| P20073 | GFGTDEQAIVDVVANRSNDQRQK   | 2549.18 | 2546.25 | 2.93  | 1147.94 | 2.E-17 |

|        |                                        |         |         |       |         |        |
|--------|----------------------------------------|---------|---------|-------|---------|--------|
| P61247 | VERADGYEPPVQESV                        | 1673.79 | 1673.79 | 0.00  | -0.45   | 2.E-17 |
| P61247 | VERADGYEPPVQESV                        | 1673.76 | 1673.79 | -0.03 | -18.61  | 2.E-17 |
| P07910 | MESEGGADD(37)SAEEGDLLDDDDNEDRGDDQLELIK | 3805.47 | 3789.48 | 15.99 | 4201.40 | 2.E-17 |
| P02545 | RQNGDDPLLTYRFPPK                       | 1916.98 | 1915.99 | 0.99  | 514.19  | 2.E-17 |
| Q9Y230 | EYQDAFLFNELK                           | 1516.78 | 1515.72 | 1.06  | 696.25  | 2.E-17 |
| Q53HU8 | VELQELNDRFANYIDK                       | 1965.98 | 1965.98 | 0.00  | 1.89    | 2.E-17 |
| Q53HU8 | VELQELNDRFANYIDK                       | 1965.96 | 1965.98 | -0.02 | -11.89  | 2.E-17 |
| P62241 | LTPEEEEEILNK                           | 1313.67 | 1313.67 | 0.00  | -0.64   | 2.E-17 |
| P62241 | LTPEEEEEILNK                           | 1313.65 | 1313.67 | -0.02 | -13.80  | 2.E-17 |
| P35659 | KVERLTMQVSSLQREPFTIAQGK                | 2645.44 | 2645.43 | 0.01  | 2.01    | 2.E-17 |
| P08621 | TLFVARVNYDTTESK                        | 1742.88 | 1742.88 | 0.00  | 0.69    | 2.E-17 |
| O75955 | LPQVAEEISGPLTSANK                      | 1756.98 | 1752.93 | 4.05  | 2303.71 | 2.E-17 |
| P20700 | HETRLVEVDSGRQIEYKY                     | 2350.16 | 2350.16 | 0.00  | 0.25    | 3.E-17 |
| P08107 | AQIHDLVLVGGSTRIPK                      | 1803.04 | 1803.04 | 0.00  | 0.15    | 3.E-17 |
| P08758 | (41)AQVLRGTVDTFPGFDERADAETLRK          | 2837.37 | 2833.44 | 3.93  | 1384.47 | 3.E-17 |

|        |                               |         |         |       |          |        |
|--------|-------------------------------|---------|---------|-------|----------|--------|
| P08758 | (41)AQVLRGTVTDFPGFDERADAETLRK | 2833.44 | 2833.44 | 0.00  | 1.01     | 3.E-17 |
| O75683 | GRILPQDLERAGLV                | 1535.88 | 1535.88 | 0.00  | 2.58     | 3.E-17 |
| O75683 | GRILPQDLERAGLV                | 1531.77 | 1535.88 | -4.11 | -2683.85 | 3.E-17 |
| P19338 | GFGFVDFNSEEDAK                | 1564.72 | 1560.67 | 4.05  | 2589.46  | 3.E-17 |
| P19338 | GFGFVDFNSEEDAK                | 1562.93 | 1560.67 | 2.26  | 1447.01  | 3.E-17 |
| P19338 | GFGFVDFNSEEDAK                | 1558.80 | 1560.67 | -1.87 | -1202.22 | 3.E-17 |
| Q9NR30 | TFSFAIPLIEK                   | 1264.71 | 1264.71 | 0.00  | 0.40     | 3.E-17 |
| Q9NR30 | TFSFAIPLIEK                   | 1264.69 | 1264.71 | -0.02 | -12.57   | 3.E-17 |
| P02545 | RQNGDDPLLTYRFPPK              | 1916.98 | 1915.99 | 0.99  | 514.40   | 3.E-17 |
| Q96GQ7 | ARILPQDVILK                   | 1264.79 | 1264.79 | 0.00  | 0.89     | 3.E-17 |
| P62701 | VNDTIQIDLETGK                 | 1445.74 | 1444.74 | 1.00  | 694.79   | 3.E-17 |
| P26373 | STESLQANVQRLK                 | 1472.77 | 1472.79 | -0.02 | -14.59   | 3.E-17 |
| Q8N1F7 | DNALLSAIEESRK                 | 1444.80 | 1444.75 | 0.05  | 33.54    | 3.E-17 |
| Q8N1F7 | DNALLSAIEESRK                 | 1444.75 | 1444.75 | 0.00  | 0.38     | 3.E-17 |
| Q9UMS4 | EVTAAREALATLK                 | 1375.74 | 1371.77 | 3.97  | 2882.93  | 3.E-17 |



|        |                     |         |         |       |          |        |
|--------|---------------------|---------|---------|-------|----------|--------|
| Q9NR30 | EGAFSNFPISEETIK     | 1667.80 | 1667.80 | 0.00  | 0.58     | 3.E-17 |
| Q15050 | FQPLFGDFAAEK        | 1368.67 | 1368.67 | 0.00  | 2.44     | 3.E-17 |
| P07355 | AYTNFDAERDALNIETAIK | 2154.06 | 2154.06 | 0.00  | 1.87     | 3.E-17 |
| Q9BV38 | INRDLDFDFSTRFITRPAK | 2196.19 | 2196.18 | 0.01  | 2.40     | 3.E-17 |
| Q9BV38 | INRDLDFDFSTRFITRPAK | 2195.13 | 2196.18 | -1.05 | -477.44  | 3.E-17 |
| P60903 | EFPGFLENQK          | 1207.59 | 1207.59 | 0.00  | -0.26    | 3.E-17 |
| P60903 | EFPGFLENQK          | 1207.57 | 1207.59 | -0.02 | -12.68   | 3.E-17 |
| P60903 | EFPGFLENQK          | 1204.62 | 1207.59 | -2.97 | -2468.85 | 3.E-17 |
| P62701 | GNKPWISLPRGK        | 1351.77 | 1351.77 | 0.00  | 0.87     | 3.E-17 |
| O14639 | FPAAQAPDPSETPK      | 1454.70 | 1454.70 | 0.00  | 2.94     | 4.E-17 |
| P19338 | GFGFVDFNSEEDAK      | 1560.67 | 1560.67 | 0.00  | 0.89     | 4.E-17 |
| P26373 | STESLQANVQRLK       | 1477.76 | 1472.79 | 4.97  | 3361.98  | 4.E-17 |
| P26373 | STESLQANVQRLK       | 1472.79 | 1472.79 | 0.00  | -0.68    | 4.E-17 |
| O60832 | LDTSQWPLLLK         | 1312.74 | 1312.74 | 0.00  | 0.18     | 4.E-17 |
| Q9NY12 | VPYFNAPVYLENK       | 1552.79 | 1552.79 | 0.00  | 0.48     | 4.E-17 |

|        |                              |         |         |       |          |        |
|--------|------------------------------|---------|---------|-------|----------|--------|
| Q13813 | RLEAELAAHEPAIQGVLDTGK        | 2217.18 | 2217.18 | 0.00  | 0.73     | 4.E-17 |
| P62906 | NWQNVRALYIK                  | 1399.78 | 1403.77 | -3.99 | -2848.63 | 4.E-17 |
| P46782 | YLPHSAGRYAAK                 | 1332.69 | 1332.69 | 0.00  | 0.94     | 4.E-17 |
| P46782 | YLPHSAGRYAAK                 | 1331.64 | 1332.69 | -1.05 | -791.01  | 4.E-17 |
| O60812 | LKGDDLQAIK                   | 1099.62 | 1099.62 | 0.00  | -0.09    | 4.E-17 |
| P02545 | NIYSEELRETK                  | 1381.70 | 1380.69 | 1.01  | 729.25   | 4.E-17 |
| P16403 | ERSGVSLAALK                  | 1132.65 | 1129.65 | 3.00  | 2648.32  | 5.E-17 |
| P68104 | IGGIGTVPVGRVETGVLK           | 1752.93 | 1751.03 | 1.90  | 1083.86  | 5.E-17 |
| P68104 | IGGIGTVPVGRVETGVLK           | 1751.04 | 1751.03 | 0.01  | 3.62     | 5.E-17 |
| Q9GZL7 | YAVDDVPFSIPAASEIADLSNIINK    | 2661.36 | 2661.35 | 0.01  | 1.91     | 5.E-17 |
| P62906 | NWQNVRALYIK                  | 1403.77 | 1403.77 | 0.00  | 1.10     | 5.E-17 |
| P08758 | (41)AQLRGTVTDFPGFDERADAETLRK | 2858.67 | 2833.44 | 25.23 | 8824.70  | 5.E-17 |
| P02545 | LRDLEDLARERDTSRRLLAEK        | 2641.43 | 2641.43 | 0.00  | 1.13     | 5.E-17 |
| P08758 | (41)AQLRGTVTDFPGFDERADAETLRK | 2833.45 | 2833.44 | 0.01  | 1.85     | 5.E-17 |
| P08758 | (41)AQLRGTVTDFPGFDERADAETLRK | 2833.39 | 2833.44 | -0.05 | -18.72   | 5.E-17 |

|        |                      |         |         |       |          |        |
|--------|----------------------|---------|---------|-------|----------|--------|
| P33993 | LAASIAPEIYGHEDVK     | 1711.88 | 1711.88 | 0.00  | 0.32     | 6.E-17 |
| P63220 | (49)MQNDAGEFVDLYVPRK | 1938.92 | 1922.92 | 16.00 | 8250.05  | 6.E-17 |
| P61978 | IILDLISESPIK         | 1341.78 | 1339.80 | 1.98  | 1473.55  | 6.E-17 |
| P26373 | LILFPRKPSAPK         | 1365.85 | 1365.85 | 0.00  | 0.44     | 6.E-17 |
| P35659 | NVGQFSGFPFEK         | 1355.65 | 1355.65 | 0.00  | 2.16     | 6.E-17 |
| P26599 | HQNVQLPREGQEDQGLTK   | 2076.04 | 2076.03 | 0.01  | 2.60     | 6.E-17 |
| P62081 | AIIIFVVPVQLK         | 1336.85 | 1336.85 | 0.00  | 0.52     | 6.E-17 |
| P11142 | SQIHDIVLVGGSTRIPK    | 1819.03 | 1819.03 | 0.00  | -0.30    | 6.E-17 |
| P05549 | SNSNAVSAIPINK        | 1313.69 | 1313.69 | 0.00  | 2.42     | 6.E-17 |
| P11142 | SQIHDIVLVGGSTRIPK    | 1819.03 | 1819.03 | 0.00  | 0.58     | 6.E-17 |
| P16403 | ERSGVSLAALK          | 1129.65 | 1129.65 | 0.00  | 0.18     | 6.E-17 |
| P16403 | ERSGVSLAALK          | 1125.57 | 1129.65 | -4.08 | -3624.22 | 6.E-17 |
| P26641 | (41)AAGTLYTYPENWRAFK | 1928.95 | 1928.94 | 0.01  | 2.90     | 7.E-17 |
| P05388 | LLPHIRGNVGFVFTK      | 1696.98 | 1696.98 | 0.00  | 1.97     | 7.E-17 |
| Q07021 | AFVDFLSDEIK          | 1283.65 | 1282.64 | 1.01  | 783.56   | 7.E-17 |

|        |                         |         |         |       |          |        |
|--------|-------------------------|---------|---------|-------|----------|--------|
| P50995 | QRQQILLSFK              | 1259.73 | 1259.73 | 0.00  | 1.91     | 7.E-17 |
| Q8N108 | DNEQALYELVK             | 1320.66 | 1320.66 | 0.00  | 0.89     | 7.E-17 |
| P14678 | RVLGLVLLRGENLVSMTEGPPPK | 2573.47 | 2573.47 | 0.00  | 1.03     | 7.E-17 |
| P14678 | RVLGLVLLRGENLVSMTEGPPPK | 2573.47 | 2573.47 | 0.00  | 0.99     | 7.E-17 |
| P36578 | GHRIEEVPELPLVVEDK       | 1958.05 | 1958.05 | 0.00  | 1.97     | 7.E-17 |
| P02545 | RQNGDDPLLTYRFPPK        | 1916.97 | 1915.99 | 0.98  | 513.67   | 7.E-17 |
| P02545 | LRDLEDGLARERDTSRRLAELK  | 2641.43 | 2641.43 | 0.00  | -1.11    | 7.E-17 |
| P33993 | LAASIAPEIYGHEDVK        | 1709.85 | 1711.88 | -2.03 | -1188.15 | 7.E-17 |
| P09661 | NAIANASTLAEVERLK        | 1698.93 | 1698.93 | 0.00  | 0.11     | 8.E-17 |
| P11142 | SINPDEAVAYGAAVQAAILSGDK | 2259.14 | 2259.14 | 0.00  | -0.77    | 8.E-17 |
| P61978 | IILDLISESPIK            | 1339.80 | 1339.80 | 0.00  | 0.79     | 8.E-17 |
| Q13813 | HQAFEAEELSANQSRIDALEK   | 2256.12 | 2256.11 | 0.01  | 2.64     | 8.E-17 |
| P62906 | VSRDTLYEAVREVLHGNQRK    | 2369.26 | 2369.26 | 0.00  | 0.31     | 8.E-17 |
| P07355 | DIISDTSGDFRK            | 1356.64 | 1352.66 | 3.98  | 2936.46  | 9.E-17 |
| P07355 | DIISDTSGDFRK            | 1353.70 | 1352.66 | 1.04  | 766.80   | 9.E-17 |

|        |                                   |         |         |         |           |        |
|--------|-----------------------------------|---------|---------|---------|-----------|--------|
| P07355 | DIISDTSGDFRK                      | 1352.66 | 1352.66 | 0.00    | 2.30      | 9.E-17 |
| P11142 | SQIHDIVLVGGSTRIPK                 | 1820.98 | 1819.03 | 1.95    | 1072.09   | 9.E-17 |
| Q9UMS4 | EVTAAREALATLK                     | 1371.77 | 1371.77 | 0.00    | 2.45      | 9.E-17 |
| Q3BDU5 | LVRSVTVVEDDEDEDGDDLLHHHHVSGSRR    | 3422.62 | 3422.62 | 0.00    | -0.19     | 9.E-17 |
| Q59FS3 | VAYLLNYSFSRRTLAVHDAILEDLVFPSEIVGK | 3556.00 | 3679.95 | -123.95 | -34857.40 | 9.E-17 |
| P11142 | SQIHDIVLVGGSTRIPK                 | 1820.99 | 1819.03 | 1.96    | 1073.68   | 9.E-17 |
| P07355 | AYTNFDAERDALNIETAIK               | 2154.06 | 2154.06 | 0.00    | 1.45      | 9.E-17 |
| P62081 | AQLRELNITAAK                      | 1326.76 | 1326.76 | 0.00    | 0.96      | 9.E-17 |
| P62081 | AQLRELNITAAK                      | 1326.76 | 1326.76 | 0.00    | 1.19      | 9.E-17 |
| P49736 | RGLALALFGGEPK                     | 1329.70 | 1327.76 | 1.94    | 1457.87   | 9.E-17 |
| Q04695 | VRALEEANTELEVK                    | 1599.85 | 1599.85 | 0.00    | 2.40      | 9.E-17 |
| Q04695 | VRALEEANTELEVK                    | 1595.86 | 1599.85 | -3.99   | -2501.21  | 9.E-17 |
| Q04695 | VRALEEANTELEVK                    | 1599.85 | 1599.85 | 0.00    | 3.02      | 1.E-16 |
| Q8N108 | DNEQALYELVK                       | 1322.66 | 1320.66 | 2.00    | 1511.11   | 1.E-16 |
| P34931 | VEIANDQGNRTTPSYVAFTDTERLIGDAAK    | 3366.70 | 3364.69 | 2.01    | 596.77    | 1.E-16 |

|        |                          |         |         |       |         |        |
|--------|--------------------------|---------|---------|-------|---------|--------|
| P19338 | EVFEDAAEIRLVSK           | 1604.84 | 1604.84 | 0.00  | -0.03   | 1.E-16 |
| P19338 | EVFEDAAEIRLVSK           | 1604.84 | 1604.84 | 0.00  | -0.03   | 1.E-16 |
| P22626 | IDTIEIITDRQSGK           | 1587.86 | 1587.85 | 0.01  | 3.23    | 1.E-16 |
| P22626 | IDTIEIITDRQSGK           | 1587.77 | 1587.85 | -0.08 | -51.63  | 1.E-16 |
| Q15434 | GYGFVDFDSPSAAQK          | 1590.83 | 1587.72 | 3.11  | 1954.32 | 1.E-16 |
| Q15434 | GYGFVDFDSPSAAQK          | 1587.72 | 1587.72 | 0.00  | 2.89    | 1.E-16 |
| Q12905 | ILPTLEAVAALGNK           | 1408.83 | 1408.83 | 0.00  | -0.37   | 1.E-16 |
| Q12905 | ILPTLEAVAALGNK           | 1408.81 | 1408.83 | -0.02 | -15.14  | 1.E-16 |
| O60506 | LDEIYVAGLVAHSDLDERAIEALK | 2639.38 | 2639.38 | 0.00  | -1.28   | 1.E-16 |
| P38919 | RDELTLEGIK               | 1172.64 | 1172.64 | 0.00  | 1.81    | 1.E-16 |
| P05783 | VIDDTNITRLQLETEIEALK     | 2313.25 | 2313.24 | 0.01  | 2.63    | 1.E-16 |
| P08670 | ILLAELEQLK               | 1169.67 | 1168.71 | 0.96  | 822.29  | 1.E-16 |
| P08670 | ILLAELEQLK               | 1168.71 | 1168.71 | 0.00  | 2.31    | 1.E-16 |
| P02545 | RTLEGELHDLRGQVAK         | 1820.99 | 1820.99 | 0.00  | 0.52    | 1.E-16 |
| Q07021 | AFVDFLSDEIK              | 1283.64 | 1282.64 | 1.00  | 782.31  | 1.E-16 |

|        |                      |         |         |       |          |        |
|--------|----------------------|---------|---------|-------|----------|--------|
| P19338 | FGYVDFESAEDLEK       | 1647.73 | 1647.73 | 0.00  | 1.22     | 1.E-16 |
| O00148 | GLAITFVSDENDAK       | 1482.78 | 1478.73 | 4.05  | 2728.64  | 1.E-16 |
| O00148 | GLAITFVSDENDAK       | 1481.74 | 1478.73 | 3.01  | 2034.33  | 1.E-16 |
| O00148 | GLAITFVSDENDAK       | 1479.74 | 1478.73 | 1.01  | 680.15   | 1.E-16 |
| O60506 | DLEGENIEIVFAKPPDQK   | 2041.04 | 2041.04 | 0.00  | 0.77     | 1.E-16 |
| Q04695 | VRALEEANTELEVK       | 1595.86 | 1599.85 | -3.99 | -2499.89 | 1.E-16 |
| Q09666 | GEGPEVDVNLPK         | 1256.71 | 1252.63 | 4.08  | 3247.45  | 1.E-16 |
| Q16576 | GEFGGFGSVTGK         | 1150.59 | 1141.54 | 9.05  | 7866.51  | 2.E-16 |
| Q16576 | GEFGGFGSVTGK         | 1147.62 | 1141.54 | 6.08  | 5297.52  | 2.E-16 |
| P49736 | RGLALALFGGEPK        | 1327.76 | 1327.76 | 0.00  | 2.13     | 2.E-16 |
| Q9BUH6 | VPGPEAAPRLRALTLGLAK  | 1929.15 | 1929.15 | 0.00  | 0.62     | 2.E-16 |
| O15042 | NPPNQSSNERPPSLLVIETK | 2219.15 | 2219.15 | 0.00  | 1.36     | 2.E-16 |
| P18124 | RIALTDNALIARSLGK     | 1711.01 | 1711.01 | 0.00  | 1.39     | 2.E-16 |
| Q9UMS4 | TVPEELVKPEELSK       | 1606.84 | 1596.86 | 9.98  | 6208.46  | 2.E-16 |
| Q9UMS4 | TVPEELVKPEELSK       | 1604.83 | 1596.86 | 7.97  | 4966.49  | 2.E-16 |

|        |                     |         |         |       |          |        |
|--------|---------------------|---------|---------|-------|----------|--------|
| O00148 | LTLHGLQQYYVK        | 1459.80 | 1461.80 | -2.00 | -1372.03 | 2.E-16 |
| Q9NWB6 | LAEEQLRIVEEQRK      | 1739.95 | 1739.95 | 0.00  | 0.59     | 2.E-16 |
| Q07021 | VEEQPELTSTPNFVVEVIK | 2286.17 | 2286.16 | 0.01  | 2.64     | 2.E-16 |
| P08758 | TLFGRDLLDDLK        | 1404.76 | 1404.76 | 0.00  | 0.11     | 2.E-16 |
| Q09666 | GEGPEVDVNLPK        | 1255.71 | 1252.63 | 3.08  | 2449.62  | 2.E-16 |
| Q09666 | GEGPEVDVNLPK        | 1252.63 | 1252.63 | 0.00  | 2.16     | 2.E-16 |
| P19338 | EVFEDAAEIRLVSK      | 1604.84 | 1604.84 | 0.00  | 0.28     | 2.E-16 |
| P02545 | RQNGDDPLLTYRFPPK    | 1916.97 | 1915.99 | 0.98  | 513.61   | 2.E-16 |
| O00148 | LTLHGLQQYYVK        | 1461.80 | 1461.80 | 0.00  | 2.68     | 2.E-16 |
| P11021 | KSDIDEIVLVGGSTRIPK  | 1926.08 | 1926.08 | 0.00  | 0.70     | 2.E-16 |
| Q9NR30 | TFSFAIPLIEK         | 1264.71 | 1264.71 | 0.00  | 0.32     | 2.E-16 |
| Q9NR30 | TFSFAIPLIEK         | 1264.70 | 1264.71 | -0.01 | -11.54   | 2.E-16 |
| O75475 | NMFLVGEEDSVITQVLNK  | 1979.00 | 1963.01 | 15.99 | 8082.03  | 2.E-16 |
| P07355 | SLYYYIQDQTK         | 1420.74 | 1420.69 | 0.05  | 32.91    | 2.E-16 |
| P07355 | SLYYYIQDQTK         | 1420.69 | 1420.69 | 0.00  | 1.73     | 2.E-16 |



|        |                                  |         |         |       |         |        |
|--------|----------------------------------|---------|---------|-------|---------|--------|
| Q8N1F7 | DNALLSAIEESRK                    | 1444.80 | 1444.75 | 0.05  | 33.33   | 2.E-16 |
| Q8N1F7 | DNALLSAIEESRK                    | 1444.75 | 1444.75 | 0.00  | 0.45    | 2.E-16 |
| Q8N1F7 | DNALLSAIEESRK                    | 1443.71 | 1444.75 | -1.04 | -719.36 | 2.E-16 |
| P08107 | SENVQDLLLLDVAPLSLGLLETAGGVMTALIK | 3180.74 | 3179.74 | 1.00  | 314.66  | 2.E-16 |
| Q53F64 | IFVGGLNPEATEEK                   | 1502.79 | 1502.76 | 0.03  | 19.87   | 2.E-16 |
| Q53F64 | IFVGGLNPEATEEK                   | 1502.76 | 1502.76 | 0.00  | -1.09   | 2.E-16 |
| Q53F64 | IFVGGLNPEATEEK                   | 1502.74 | 1502.76 | -0.02 | -16.19  | 2.E-16 |
| Q9UKX7 | LQQUESTFLFHGNK                   | 1549.78 | 1547.77 | 2.01  | 1297.26 | 2.E-16 |
| Q9UKX7 | LQQUESTFLFHGNK                   | 1547.77 | 1547.77 | 0.00  | 1.99    | 2.E-16 |
| P23396 | KPLPDHVSIVEPKDEILPTTPISEQK       | 2914.42 | 2909.57 | 4.85  | 1664.40 | 2.E-16 |
| Q03701 | ELLITDLLPDNRK                    | 1538.87 | 1538.87 | 0.00  | 1.71    | 2.E-16 |
| Q03701 | ELLITDLLPDNRK                    | 1538.77 | 1538.87 | -0.10 | -64.91  | 2.E-16 |
| O43852 | TFDQLTPEESK                      | 1296.66 | 1293.61 | 3.05  | 2352.93 | 2.E-16 |
| P19338 | TLVLSNLSYSATEETLQEVFEK           | 2500.25 | 2500.26 | -0.01 | -2.13   | 2.E-16 |
| Q9BY77 | (41)ADISLDELIRK                  | 1313.72 | 1313.72 | 0.00  | 2.22    | 3.E-16 |

|        |                             |         |         |         |           |        |
|--------|-----------------------------|---------|---------|---------|-----------|--------|
| Q15029 | RLWGDIYFNPK                 | 1407.73 | 1407.73 | 0.00    | 0.78      | 3.E-16 |
| O75367 | GKLEAIITPPPAK               | 1333.80 | 1333.80 | 0.00    | 0.53      | 3.E-16 |
| O75475 | STMLYNKFKNMFLVGEGDSVITQVLNK | 2965.52 | 3075.58 | -110.06 | -37112.80 | 3.E-16 |
| P23396 | RFGFPEGSVELYAEK             | 1727.85 | 1727.85 | 0.00    | 1.02      | 3.E-16 |
| P11940 | PLYVALAQRK                  | 1157.69 | 1157.69 | 0.00    | 1.08      | 3.E-16 |
| P11940 | PLYVALAQRK                  | 1153.69 | 1157.69 | -4.00   | -3470.57  | 3.E-16 |
| P09661 | KGGPSPGDVEAIK               | 1248.68 | 1253.66 | -4.98   | -3991.04  | 3.E-16 |
| Q00059 | IYQDAYRAEWQVYK              | 1831.89 | 1831.89 | 0.00    | 1.19      | 3.E-16 |
| Q8TED0 | FLLQLGLVEK                  | 1158.70 | 1158.70 | 0.00    | 1.11      | 3.E-16 |
| Q9H307 | (41)AVAVRTLQEQLK            | 1528.85 | 1525.85 | 3.00    | 1962.25   | 3.E-16 |
| Q9H307 | (41)AVAVRTLQEQLK            | 1525.85 | 1525.85 | 0.00    | 0.51      | 3.E-16 |
| Q9NX34 | (51)SVQPTVSLGGFEITPPVLRK    | 2419.39 | 2378.36 | 41.03   | 16958.20  | 3.E-16 |
| P32969 | TILSNQTVDIPENVDTLK          | 2112.13 | 2112.13 | 0.00    | 0.34      | 3.E-16 |
| P32969 | TILSNQTVDIPENVDTLK          | 2112.08 | 2112.13 | -0.05   | -23.52    | 3.E-16 |
| P02545 | RQNGDDPLLTYRFPPK            | 1916.97 | 1915.99 | 0.98    | 513.51    | 3.E-16 |

|        |                       |         |         |       |         |        |
|--------|-----------------------|---------|---------|-------|---------|--------|
| P16403 | (51)SETAPAAPAAAPPAEK  | 1519.75 | 1519.75 | 0.00  | 2.48    | 3.E-16 |
| P61978 | IILDLISESPIK          | 1339.80 | 1339.80 | 0.00  | 2.88    | 3.E-16 |
| P19338 | VEGTEPTTAFNLFVGNLNFNK | 2313.16 | 2311.15 | 2.01  | 869.19  | 3.E-16 |
| O95793 | SEISQVFEIALK          | 1368.80 | 1362.74 | 6.06  | 4426.40 | 4.E-16 |
| O95793 | SEISQVFEIALK          | 1367.80 | 1362.74 | 5.06  | 3695.84 | 4.E-16 |
| P09661 | KGGPSPGDVEAIK         | 1253.66 | 1253.66 | 0.00  | 0.94    | 4.E-16 |
| P62701 | VRTDITYPAGFMDVISIDK   | 2140.09 | 2140.09 | 0.00  | 0.00    | 4.E-16 |
| P0C0S8 | TRIIPRHLQLAIRNDEELNK  | 2428.37 | 2428.37 | 0.00  | 0.81    | 4.E-16 |
| Q9H307 | (41)AVAVRTLQEQLK      | 1525.85 | 1525.85 | 0.00  | 1.83    | 4.E-16 |
| Q9H307 | (41)AVAVRTLQEQLK      | 1525.82 | 1525.85 | -0.03 | -16.46  | 4.E-16 |
| Q15717 | VAGHSLGYGFVNYVTAK     | 1781.99 | 1781.91 | 0.08  | 45.10   | 4.E-16 |
| Q15717 | VAGHSLGYGFVNYVTAK     | 1781.91 | 1781.91 | 0.00  | 1.78    | 4.E-16 |
| Q6DKI1 | TIPLTDNTVIEEHLGK      | 1780.95 | 1778.94 | 2.01  | 1127.04 | 4.E-16 |
| P61981 | TAFDDAIAELDTLNEDSYK   | 2129.96 | 2129.96 | 0.00  | 0.41    | 4.E-16 |
| Q49A26 | (41)AAVSLRLGDLVWGK    | 1525.86 | 1525.86 | 0.00  | 1.14    | 4.E-16 |

|        |                             |         |         |        |          |        |
|--------|-----------------------------|---------|---------|--------|----------|--------|
| O60506 | EFNEDGALAVLQQFK             | 1707.85 | 1707.85 | 0.00   | -0.45    | 4.E-16 |
| O43390 | DYAFVHFEDRGA AVK            | 1731.87 | 1723.83 | 8.04   | 4640.15  | 4.E-16 |
| O43852 | TFDQLTPEESK                 | 1293.61 | 1293.61 | 0.00   | 2.75     | 4.E-16 |
| Q9NWB6 | LAEEQLRIVEEQRK              | 1739.95 | 1739.95 | 0.00   | 0.59     | 4.E-16 |
| P22087 | ANCIDSTASAEAVFASEVK         | 1974.99 | 1968.91 | 6.08   | 3076.36  | 5.E-16 |
| P62906 | NWQNVRALYIK                 | 1405.78 | 1403.77 | 2.01   | 1428.64  | 5.E-16 |
| P04792 | LATQSNEITIPVTFESRAQLGGPEAAK | 2837.36 | 2827.47 | 9.89   | 3487.27  | 5.E-16 |
| Q16891 | TSSAETPTIPLGSAVEAIK         | 1870.99 | 1870.99 | 0.00   | 0.68     | 5.E-16 |
| P35908 | VDLLNQEIEFLK                | 1459.79 | 1459.79 | 0.00   | -0.49    | 5.E-16 |
| Q562R8 | LRVAPEEHPVLLTEAPLNPK        | 2351.29 | 2222.24 | 129.05 | 54883.90 | 5.E-16 |
| Q562R8 | LRVAPEEHPVLLTEAPLNPK        | 2345.21 | 2222.24 | 122.97 | 52434.20 | 5.E-16 |
| P0C0S8 | VTIAQGGVLPNIQAVLLPK         | 1930.16 | 1930.16 | 0.00   | 0.01     | 5.E-16 |
| P19338 | VEGTEPTTAFNLFVGNLNFNK       | 2311.15 | 2311.15 | 0.00   | -0.14    | 5.E-16 |
| P05787 | YEELQSLAGK                  | 1140.70 | 1136.57 | 4.13   | 3619.68  | 5.E-16 |
| P05787 | YEELQSLAGK                  | 1136.57 | 1136.57 | 0.00   | 1.99     | 5.E-16 |

|        |                          |         |         |       |         |        |
|--------|--------------------------|---------|---------|-------|---------|--------|
| P05787 | YEELQSLAGK               | 1135.54 | 1136.57 | -1.03 | -907.18 | 5.E-16 |
| P62081 | AIIIFVPVQLK              | 1336.85 | 1336.85 | 0.00  | 0.15    | 5.E-16 |
| P62081 | AIIIFVPVQLK              | 1336.83 | 1336.85 | -0.02 | -14.22  | 5.E-16 |
| Q6P1J9 | (41)ADVLSVLRQYNIQK       | 1687.93 | 1687.93 | 0.00  | 1.93    | 5.E-16 |
| Q17R45 | ALVRLALEAEK              | 1211.72 | 1211.72 | 0.00  | 1.13    | 6.E-16 |
| O00422 | GTHFNFAIVFTDVK           | 1594.81 | 1594.81 | 0.00  | 0.98    | 6.E-16 |
| Q02539 | ALAAAGYDVEK              | 1106.56 | 1106.56 | 0.00  | -0.14   | 6.E-16 |
| Q02539 | ALAAAGYDVEK              | 1106.55 | 1106.56 | -0.01 | -11.08  | 6.E-16 |
| Q6DKI1 | TIPLTDNTVIEEHLGK         | 1778.94 | 1778.94 | 0.00  | 0.73    | 6.E-16 |
| Q04695 | TRLEQEIATYRRLEGEDAHLTQYK | 3032.58 | 3032.57 | 0.01  | 3.33    | 6.E-16 |
| P11021 | VTHAVVTVPAYFNDAQRQATK    | 2314.19 | 2315.20 | -1.01 | -434.66 | 7.E-16 |
| O60506 | DLEGENIEIVFAKPPDQK       | 2041.04 | 2041.04 | 0.00  | 0.82    | 7.E-16 |
| O43290 | GVLQEEEDVLVNVNLVVK       | 2015.97 | 2011.05 | 4.92  | 2442.05 | 7.E-16 |
| P02545 | LRDLEDLARERDTSRRLLAEK    | 2641.43 | 2641.43 | 0.00  | 1.01    | 7.E-16 |
| P08729 | LEAAIAEAEERGELALK        | 1811.96 | 1811.96 | 0.00  | 2.35    | 7.E-16 |

|        |                        |         |         |      |         |        |
|--------|------------------------|---------|---------|------|---------|--------|
| P19338 | TLVLSNLSYSATEETLQEVFEK | 2500.26 | 2500.26 | 0.00 | -1.21   | 8.E-16 |
| P08621 | TLFVARVNYDTTESK        | 1742.88 | 1742.88 | 0.00 | 2.76    | 8.E-16 |
| P19338 | EVFEDAAEIRLVSK         | 1604.88 | 1604.84 | 0.04 | 22.34   | 8.E-16 |
| P19338 | EVFEDAAEIRLVSK         | 1604.84 | 1604.84 | 0.00 | 0.22    | 8.E-16 |
| P07355 | DIISDTSGDFRK           | 1352.66 | 1352.66 | 0.00 | 0.01    | 8.E-16 |
| Q14444 | TVLELQYVLDK            | 1319.73 | 1319.73 | 0.00 | 0.34    | 8.E-16 |
| P62424 | VPPAINQFTQALDRQTATQLLK | 2452.34 | 2452.34 | 0.00 | 0.05    | 8.E-16 |
| P62906 | NWQNVRALYIK            | 1403.77 | 1403.77 | 0.00 | 0.74    | 8.E-16 |
| P02545 | RQNGDDPLLTYRFPPK       | 1916.98 | 1915.99 | 0.99 | 514.71  | 8.E-16 |
| Q9NR30 | EGAFSNFPISEETIK        | 1667.80 | 1667.80 | 0.00 | 1.00    | 8.E-16 |
| Q9NR30 | DLIAQARTGTGK           | 1233.67 | 1229.67 | 4.00 | 3242.45 | 8.E-16 |
| Q9NR30 | DLIAQARTGTGK           | 1229.67 | 1229.67 | 0.00 | 1.24    | 8.E-16 |
| P62906 | QIPRILGPGLNK           | 1308.60 | 1304.79 | 3.81 | 2909.43 | 8.E-16 |
| Q9H307 | LTEVPVEPVLTVHPESK      | 1873.02 | 1873.02 | 0.00 | 1.42    | 9.E-16 |
| Q14978 | RGAAGDWGERANQVLK       | 1726.89 | 1726.89 | 0.00 | 1.17    | 9.E-16 |

|        |                             |         |         |        |          |        |
|--------|-----------------------------|---------|---------|--------|----------|--------|
| P06748 | MSVQPTVSLGGFEITPPVVLRLK     | 2484.39 | 2467.39 | 17.00  | 6843.09  | 9.E-16 |
| Q86V81 | LLVSNLDFGVSDADIQELFAEFGTLK  | 2840.45 | 2840.45 | 0.00   | 1.22     | 9.E-16 |
| Q86V81 | LLVSNLDFGVSDADIQELFAEFGTLK  | 2840.45 | 2840.45 | 0.00   | -1.38    | 9.E-16 |
| P06748 | MSVQPTVSLGGFEITPPVVLRLK     | 2483.39 | 2467.39 | 16.00  | 6440.93  | 9.E-16 |
| P06748 | MSVQPTVSLGGFEITPPVVLRLK     | 2483.34 | 2467.39 | 15.95  | 6422.25  | 9.E-16 |
| Q562R8 | LRVAPEEHPVLLTEAPLNPK        | 2351.29 | 2222.24 | 129.05 | 54883.80 | 9.E-16 |
| P04792 | LATQSNEITIPVTFESRAQLGGPEAAK | 2827.47 | 2827.47 | 0.00   | 0.87     | 1.E-15 |
| P05388 | AIRGHLENNPALEK              | 1560.84 | 1560.84 | 0.00   | 1.21     | 1.E-15 |
| P62701 | GIPHLVTHDARTIRYPDPLIK       | 2411.34 | 2411.34 | 0.00   | 0.46     | 1.E-15 |
| P02545 | DLEALLNSK                   | 1001.54 | 1001.54 | 0.00   | 0.99     | 1.E-15 |
| P02545 | DLEALLNSK                   | 1001.53 | 1001.54 | -0.01  | -11.19   | 1.E-15 |
| P60709 | ILTERGYSFTTAEREIVRDIK       | 2597.39 | 2597.38 | 0.01   | 1.97     | 1.E-15 |
| P07355 | AYTNFDAERDALNIETAIK         | 2154.06 | 2154.06 | 0.00   | 1.22     | 1.E-15 |
| Q96GQ7 | ARILPQDVILK                 | 1264.79 | 1264.79 | 0.00   | 1.21     | 1.E-15 |
| P18124 | RIALTDNALIARSLGK            | 1711.01 | 1711.01 | 0.00   | 1.63     | 1.E-15 |

|        |                                    |         |         |       |          |        |
|--------|------------------------------------|---------|---------|-------|----------|--------|
| P14866 | NRIQHPSNVLHFFNAPLEVTEENFFEICDELGVK | 4041.96 | 4041.97 | -0.01 | -1.65    | 1.E-15 |
| P50995 | TPVLFDIYEIK                        | 1336.73 | 1336.73 | 0.00  | 1.70     | 1.E-15 |
| Q09028 | TVALWDLRNLK                        | 1327.76 | 1327.76 | 0.00  | 1.59     | 1.E-15 |
| Q09028 | TVALWDLRNLK                        | 1327.74 | 1327.76 | -0.02 | -11.90   | 1.E-15 |
| Q15717 | VAGHSLGYGFVNYVTAK                  | 1781.99 | 1781.91 | 0.08  | 45.60    | 1.E-15 |
| Q15717 | VAGHSLGYGFVNYVTAK                  | 1781.91 | 1781.91 | 0.00  | 1.33     | 1.E-15 |
| P07355 | DIISDTSGDFRK                       | 1354.74 | 1352.66 | 2.08  | 1534.04  | 1.E-15 |
| P08758 | GLGTDEESILLLLTSRSNAQRQEISAAFK      | 3138.53 | 3134.62 | 3.91  | 1244.27  | 1.E-15 |
| P16403 | (51)SETAPAAPAAAPPAEK               | 1519.75 | 1519.75 | 0.00  | 2.62     | 1.E-15 |
| Q9H307 | (41)AVAVRTLQEULEK                  | 1528.85 | 1525.85 | 3.00  | 1960.88  | 1.E-15 |
| Q9H307 | (41)AVAVRTLQEULEK                  | 1525.85 | 1525.85 | 0.00  | 0.51     | 1.E-15 |
| P08729 | LEAAIAEAEERGELALK                  | 1807.93 | 1811.96 | -4.03 | -2229.53 | 1.E-15 |
| Q9BXY0 | ALIAAQLDNAIEK                      | 1367.71 | 1368.76 | -1.05 | -770.30  | 1.E-15 |
| P08107 | EIAEAYLGYPVNAVITVPAYFNDSQRQATK     | 3428.73 | 3428.73 | 0.00  | -0.49    | 1.E-15 |
| P11142 | SQIHDIVLVGGSTRIPK                  | 1820.98 | 1819.03 | 1.95  | 1073.57  | 1.E-15 |



|        |                     |         |         |       |        |        |
|--------|---------------------|---------|---------|-------|--------|--------|
| P11142 | SQIHDIVLVGGSTRIPK   | 1819.03 | 1819.03 | 0.00  | 0.09   | 1.E-15 |
| Q9H307 | (41)AVAVRTLQEQLK    | 1525.85 | 1525.85 | 0.00  | 0.78   | 1.E-15 |
| P08670 | VESLQEEIAFLK        | 1404.75 | 1404.75 | 0.00  | 1.91   | 1.E-15 |
| P08670 | VESLQEEIAFLK        | 1404.73 | 1404.75 | -0.02 | -14.03 | 1.E-15 |
| P16403 | (51)SETAAPAAAPPAEK  | 1519.75 | 1519.75 | 0.00  | 2.55   | 1.E-15 |
| P16403 | (51)SETAAPAAAPPAEK  | 1519.73 | 1519.75 | -0.02 | -15.22 | 1.E-15 |
| P22626 | IDTIEIITDRQSGK      | 1587.85 | 1587.85 | 0.00  | 2.60   | 1.E-15 |
| P22626 | IDTIEIITDRQSGK      | 1587.77 | 1587.85 | -0.08 | -51.57 | 1.E-15 |
| P22626 | IDTIEIITDRQSGK      | 1587.85 | 1587.85 | 0.00  | 2.66   | 1.E-15 |
| P22626 | IDTIEIITDRQSGK      | 1587.77 | 1587.85 | -0.08 | -51.69 | 1.E-15 |
| P46777 | AHAAIRENPVYEK       | 1496.77 | 1496.77 | 0.00  | 1.97   | 1.E-15 |
| P23396 | RFGFPEGSVELYAEK     | 1727.85 | 1727.85 | 0.00  | 1.19   | 1.E-15 |
| O00148 | LTLHGLQQYYVK        | 1461.80 | 1461.80 | 0.00  | 2.06   | 1.E-15 |
| Q13813 | LLVGSEDYGRDLTGVQNLK | 2233.11 | 2232.19 | 0.92  | 410.86 | 1.E-15 |
| Q13813 | LLVGSEDYGRDLTGVQNLK | 2232.19 | 2232.19 | 0.00  | 1.57   | 1.E-15 |

|        |                                    |         |         |       |         |        |
|--------|------------------------------------|---------|---------|-------|---------|--------|
| P05783 | KGPQVRDWSHYFK                      | 1646.83 | 1646.83 | 0.00  | 2.41    | 1.E-15 |
| Q02539 | ALAAAGYDVEK                        | 1106.56 | 1106.56 | 0.00  | 0.31    | 1.E-15 |
| P50995 | TPVLFDIYEIK                        | 1340.77 | 1336.73 | 4.04  | 3016.75 | 2.E-15 |
| P61978 | IILDLISESPIK                       | 1341.78 | 1339.80 | 1.98  | 1473.32 | 2.E-15 |
| P40429 | YQAVTATLEEK                        | 1251.63 | 1251.63 | 0.00  | 0.91    | 2.E-15 |
| P0C0S8 | VTIAQGGVLPNIQAVLLPK                | 1930.16 | 1930.16 | 0.00  | 0.58    | 2.E-15 |
| P0C0S8 | VTIAQGGVLPNIQAVLLPK                | 1930.12 | 1930.16 | -0.04 | -21.03  | 2.E-15 |
| O00148 | (41)AEQDVENDLLDYDEEEEPQAPQESTPAPPK | 3424.51 | 3424.50 | 0.01  | 2.63    | 2.E-15 |
| P31946 | AVTEQGHELSNEERNLLSVAYK             | 2486.24 | 2486.24 | 0.00  | 0.48    | 2.E-15 |
| P08729 | LEAAIAEAEERGELALK                  | 1811.97 | 1811.96 | 0.01  | 3.51    | 2.E-15 |
| O60812 | VDSLLENLEK                         | 1160.62 | 1158.61 | 2.01  | 1731.40 | 2.E-15 |
| O75475 | NMFLVGEEDSVITQVLNK                 | 1979.00 | 1963.01 | 15.99 | 8081.93 | 2.E-15 |
| P07910 | LKGDDLQAIKK                        | 1227.72 | 1227.72 | 0.00  | 0.12    | 2.E-15 |
| O43172 | APDDLVPVVK                         | 1127.53 | 1122.63 | 4.90  | 4344.79 | 2.E-15 |
| O43172 | APDDLVPVVK                         | 1122.63 | 1122.63 | 0.00  | 2.20    | 2.E-15 |

|        |                            |         |         |       |          |        |
|--------|----------------------------|---------|---------|-------|----------|--------|
| Q9BXY0 | ALIAAQLDNAIEK              | 1368.76 | 1368.76 | 0.00  | 2.89     | 2.E-15 |
| P08579 | MRGQAFVIFK                 | 1195.65 | 1195.65 | 0.00  | 0.95     | 2.E-15 |
| P62906 | QIPRILGPGLNK               | 1304.79 | 1304.79 | 0.00  | -0.25    | 2.E-15 |
| P62906 | QIPRILGPGLNK               | 1304.77 | 1304.79 | -0.02 | -13.66   | 2.E-15 |
| P02545 | DLEALLNSK                  | 1003.62 | 1001.54 | 2.08  | 2068.12  | 2.E-15 |
| P33993 | LAASIAPEIYGHEDVK           | 1711.88 | 1711.88 | 0.00  | -0.44    | 2.E-15 |
| P61978 | IILDLISESPIK               | 1340.80 | 1339.80 | 1.00  | 749.38   | 2.E-15 |
| P33991 | GLQVDLQSDGAAAEDIVASEQSLGQK | 2629.29 | 2628.29 | 1.00  | 380.29   | 2.E-15 |
| P11142 | TVTNAVVTVPAYFNDSQRQATK     | 2409.23 | 2409.23 | 0.00  | 0.87     | 2.E-15 |
| P07355 | SLYYYIQQDTK                | 1424.80 | 1420.69 | 4.11  | 2884.73  | 2.E-15 |
| Q9NR30 | DLIAQARTGTGK               | 1227.67 | 1229.67 | -2.00 | -1628.43 | 2.E-15 |
| Q49A26 | (41)AAVSLRLGDLVWGK         | 1525.86 | 1525.86 | 0.00  | 1.14     | 2.E-15 |
| P62917 | LARASGNyatVISHNPETK        | 2028.04 | 2028.04 | 0.00  | -0.31    | 2.E-15 |
| Q8IVB7 | (41)AETAAGVGRFK            | 1151.52 | 1147.60 | 3.92  | 3403.70  | 2.E-15 |
| P14136 | VRFLEQQNK                  | 1160.63 | 1160.63 | 0.00  | 2.42     | 2.E-15 |

|        |                        |         |         |       |         |        |
|--------|------------------------|---------|---------|-------|---------|--------|
| P08670 | FADLSEAAANRRNDALRQAK   | 2103.06 | 2103.05 | 0.01  | 2.52    | 2.E-15 |
| P07355 | AYTNFDAERDALNIETAIK    | 2154.06 | 2154.06 | 0.00  | 1.82    | 2.E-15 |
| Q12906 | VADNLAIQLAAVTEDK       | 1675.90 | 1669.89 | 6.01  | 3588.74 | 2.E-15 |
| O60812 | VDSLLENLEK             | 1159.48 | 1158.61 | 0.87  | 752.06  | 2.E-15 |
| O60812 | VDSLLENLEK             | 1158.61 | 1158.61 | 0.00  | 2.33    | 2.E-15 |
| Q81Y81 | SDDDGFEIVPIEDPAK       | 1745.80 | 1745.80 | 0.00  | 1.99    | 2.E-15 |
| P61247 | VERADGYEPPVQESV        | 1673.79 | 1673.79 | 0.00  | -0.33   | 3.E-15 |
| P61247 | VERADGYEPPVQESV        | 1673.76 | 1673.79 | -0.03 | -18.61  | 3.E-15 |
| P62917 | LARASGNYATVISHNPETK    | 2028.04 | 2028.04 | 0.00  | 1.57    | 3.E-15 |
| P07355 | SLYYYIQQDTK            | 1424.80 | 1420.69 | 4.11  | 2884.94 | 3.E-15 |
| P62081 | HVVFIAQRRILPKPTRK      | 2058.27 | 2058.27 | 0.00  | 0.13    | 3.E-15 |
| O14639 | FPAAQAPDPSETPK         | 1457.80 | 1454.70 | 3.10  | 2125.17 | 3.E-15 |
| Q53F64 | IFVGGLNPEATEEK         | 1502.76 | 1502.76 | 0.00  | 2.44    | 3.E-15 |
| Q02539 | SLVSKGTLVQTK           | 1264.72 | 1259.74 | 4.98  | 3937.47 | 3.E-15 |
| P06748 | VDNDENEHQLSLRTVSLGAGAK | 2353.18 | 2352.17 | 1.01  | 427.20  | 3.E-15 |

|        |                                    |         |         |       |          |        |
|--------|------------------------------------|---------|---------|-------|----------|--------|
| Q09028 | TVALWDLRNLK                        | 1327.76 | 1327.76 | 0.00  | 1.59     | 3.E-15 |
| P14866 | NRIQHPSNVLHFFNAPLEVTEENFFEICDELGVK | 4041.96 | 4041.97 | -0.01 | -3.51    | 3.E-15 |
| P05783 | GLQAQIASSGLTVEVDAPK                | 1880.94 | 1883.00 | -2.06 | -1094.22 | 3.E-15 |
| P11021 | ERIDTRNELESYAYSLK                  | 2086.03 | 2086.03 | 0.00  | 0.16     | 3.E-15 |
| Q86V81 | LLVSNLDFGVSDADIQELFAEFGTLK         | 2840.45 | 2840.45 | 0.00  | -0.82    | 3.E-15 |
| Q86V81 | LLVSNLDFGVSDADIQELFAEFGTLK         | 2840.45 | 2840.45 | 0.00  | -0.04    | 3.E-15 |
| P07355 | SLYYYIQDTK                         | 1420.69 | 1420.69 | 0.00  | 0.81     | 3.E-15 |
| O00148 | GLAITFVSDENDAK                     | 1482.86 | 1478.73 | 4.13  | 2782.44  | 4.E-15 |
| P62081 | HVVFIAQRRILPKPTRK                  | 2057.18 | 2058.27 | -1.09 | -530.79  | 4.E-15 |
| P61247 | LMELHGEGSSSGK                      | 1334.69 | 1330.62 | 4.07  | 3047.69  | 4.E-15 |
| Q15050 | FQPLFGDFAAEK                       | 1369.65 | 1368.67 | 0.98  | 717.80   | 4.E-15 |
| Q15050 | FQPLFGDFAAEK                       | 1368.67 | 1368.67 | 0.00  | 2.00     | 4.E-15 |
| O60506 | DLEGENIEIVFAKPPDQK                 | 2041.04 | 2041.04 | 0.00  | 1.11     | 4.E-15 |
| P60709 | ILTERGYSFTTTAEREIVRDIK             | 2597.38 | 2597.38 | 0.00  | 1.16     | 4.E-15 |
| O14639 | FPAAQAPDPSETPK                     | 1454.70 | 1454.70 | 0.00  | 2.60     | 4.E-15 |

|        |                                   |         |         |         |           |        |
|--------|-----------------------------------|---------|---------|---------|-----------|--------|
| Q6DKI1 | TIPLTDNTVIEEHLGK                  | 1786.92 | 1778.94 | 7.98    | 4466.12   | 4.E-15 |
| P26373 | STESLQANVQRLK                     | 1473.77 | 1472.79 | 0.98    | 664.83    | 4.E-15 |
| P26373 | STESLQANVQRLK                     | 1472.79 | 1472.79 | 0.00    | -0.81     | 4.E-15 |
| P62736 | AGFAGDDAPRAVFPSIVGRPRHQGVVMVGMGQK | 3307.69 | 3307.68 | 0.01    | 3.38      | 4.E-15 |
| P06748 | MSVQPTVSLGGFEITPPVVLRLK           | 2339.29 | 2467.39 | -128.10 | -54758.30 | 4.E-15 |
| P46782 | TIAECLADELINAAK                   | 1641.96 | 1630.82 | 11.14   | 6785.05   | 4.E-15 |
| P46782 | TIAECLADELINAAK                   | 1637.00 | 1630.82 | 6.18    | 3778.06   | 4.E-15 |
| P46782 | TIAECLADELINAAK                   | 1636.81 | 1630.82 | 5.99    | 3660.04   | 4.E-15 |
| Q71U36 | VGINYQPPTVVPGGDLAK                | 1823.99 | 1823.98 | 0.01    | 3.12      | 4.E-15 |
| P19338 | TLVLSNLSYSATEETLQEVFEK            | 2500.26 | 2500.26 | 0.00    | -1.41     | 4.E-15 |
| P05783 | GLQAQIASSGLTVEVDAPK               | 1883.01 | 1883.00 | 0.01    | 3.68      | 4.E-15 |
| P02545 | RQNGDDPLLTYRFPPK                  | 1916.98 | 1915.99 | 0.99    | 514.29    | 4.E-15 |
| Q6DKI1 | TIPLTDNTVIEEHLGK                  | 1786.92 | 1778.94 | 7.98    | 4465.90   | 5.E-15 |
| Q8NC51 | VEFNIRKPNEGADGQWK                 | 1991.90 | 1986.99 | 4.91    | 2463.86   | 5.E-15 |
| Q8NC51 | VEFNIRKPNEGADGQWK                 | 1988.90 | 1986.99 | 1.91    | 960.46    | 5.E-15 |

|        |                             |         |         |       |          |        |
|--------|-----------------------------|---------|---------|-------|----------|--------|
| Q8NC51 | VEFNIRKPNEGADGQWK           | 1986.99 | 1986.99 | 0.00  | 2.40     | 5.E-15 |
| Q53F64 | IFVGGLNPEATEEK              | 1498.80 | 1502.76 | -3.96 | -2640.53 | 5.E-15 |
| P19338 | GFGFVDFNSEEDAK              | 1562.93 | 1560.67 | 2.26  | 1447.52  | 5.E-15 |
| P61247 | LMELHGEGSSSGK               | 1330.72 | 1330.62 | 0.10  | 74.78    | 5.E-15 |
| P61247 | LMELHGEGSSSGK               | 1330.62 | 1330.62 | 0.00  | 0.30     | 5.E-15 |
| P26373 | STESLQANVQRLK               | 1477.76 | 1472.79 | 4.97  | 3361.50  | 5.E-15 |
| P69905 | LRVDPVNFK                   | 1086.62 | 1086.62 | 0.00  | 0.59     | 5.E-15 |
| P69905 | LRVDPVNFK                   | 1086.61 | 1086.62 | -0.01 | -10.73   | 5.E-15 |
| O60812 | VDSLLENLEK                  | 1159.48 | 1158.61 | 0.87  | 752.75   | 5.E-15 |
| O60812 | VDSLLENLEK                  | 1158.61 | 1158.61 | 0.00  | 2.16     | 5.E-15 |
| Q15050 | EWLIEVPGNADPLEDQFAK         | 2170.07 | 2170.06 | 0.01  | 4.06     | 5.E-15 |
| Q15050 | EWLIEVPGNADPLEDQFAK         | 2170.02 | 2170.06 | -0.04 | -19.44   | 5.E-15 |
| P02545 | NIYSEELRETK                 | 1383.70 | 1380.69 | 3.01  | 2175.26  | 5.E-15 |
| Q9BYG3 | (41)ATFSGPAGPILSLNPQEDVEFQK | 2486.23 | 2486.23 | 0.00  | 0.08     | 5.E-15 |
| Q02539 | SLVSKGTLVQTK                | 1259.74 | 1259.74 | 0.00  | 0.89     | 6.E-15 |

|        |                     |         |         |       |         |        |
|--------|---------------------|---------|---------|-------|---------|--------|
| Q8TDN6 | PIEIQWVKPEPK        | 1466.86 | 1462.82 | 4.04  | 2753.53 | 6.E-15 |
| Q07021 | VEEQPELTSTPNFVVEVIK | 2286.16 | 2286.16 | 0.00  | 1.85    | 6.E-15 |
| P07355 | AYTNFDAERDALNIETAIK | 2154.07 | 2154.06 | 0.01  | 3.40    | 6.E-15 |
| O00148 | GLAITFVSDENDAK      | 1479.72 | 1478.73 | 0.99  | 670.56  | 6.E-15 |
| O00148 | GLAITFVSDENDAK      | 1478.73 | 1478.73 | 0.00  | 1.45    | 6.E-15 |
| O00148 | GLAITFVSDENDAK      | 1478.73 | 1478.73 | 0.00  | 1.45    | 6.E-15 |
| O00148 | GLAITFVSDENDAK      | 1478.73 | 1478.73 | 0.00  | 1.45    | 6.E-15 |
| O00148 | GLAITFVSDENDAK      | 1477.78 | 1478.73 | -0.95 | -645.20 | 6.E-15 |
| Q9NVP1 | VPLSEFDFSWSK        | 1440.69 | 1440.69 | 0.00  | 0.34    | 6.E-15 |
| P69905 | LRVDPVNFK           | 1086.62 | 1086.62 | 0.00  | 0.96    | 6.E-15 |
| P69905 | LRVDPVNFK           | 1086.61 | 1086.62 | -0.01 | -10.73  | 6.E-15 |
| P05388 | LLPHIRGNVGFVFTK     | 1697.98 | 1696.98 | 1.00  | 590.79  | 6.E-15 |
| P22626 | IDTIEIITDRQSGK      | 1587.85 | 1587.85 | 0.00  | 1.78    | 6.E-15 |
| P62987 | IIEPSLRQLAQK        | 1394.82 | 1394.82 | 0.00  | 0.70    | 6.E-15 |
| P19338 | GFGFVDFNSEEDAK      | 1561.67 | 1560.67 | 1.00  | 643.14  | 6.E-15 |



|        |                                  |         |         |        |          |        |
|--------|----------------------------------|---------|---------|--------|----------|--------|
| P23396 | KPLPDHVSIVEPK                    | 1459.83 | 1457.82 | 2.01   | 1375.11  | 6.E-15 |
| P04083 | QAWFIENEEQEYVQTVK                | 2122.98 | 2140.01 | -17.03 | -8020.63 | 6.E-15 |
| P07355 | DIISDTSGDFRK                     | 1352.66 | 1352.66 | 0.00   | 2.16     | 7.E-15 |
| P02545 | LESTESRSSFSQHARTSGRVAVEEVDEEGK   | 3306.57 | 3306.57 | 0.00   | 0.72     | 7.E-15 |
| P19338 | VEGTEPTTAFNLFVGNLNFNK            | 2312.16 | 2311.15 | 1.01   | 437.11   | 7.E-15 |
| P62701 | VRTDITYPAGFMDVISIDK              | 2142.18 | 2140.09 | 2.09   | 974.99   | 7.E-15 |
| P07355 | SLYYYIQQDTK                      | 1420.69 | 1420.69 | 0.00   | 0.95     | 7.E-15 |
| O95816 | HATRIIDEVVNK                     | 1393.77 | 1393.77 | 0.00   | 0.41     | 7.E-15 |
| P62736 | AGFAGDDAPRAVFPISVGRPRHQGVMVGMGQK | 3307.69 | 3307.68 | 0.01   | 2.41     | 7.E-15 |
| Q71U36 | VGINYQPPTVPPGGDLAK               | 1820.99 | 1823.98 | -2.99  | -1639.88 | 7.E-15 |
| P62906 | NWQNVRALYIK                      | 1403.77 | 1403.77 | 0.00   | 0.89     | 7.E-15 |
| O43390 | YGGPPPDSVYSGVQPGIGTEVFVGK        | 2506.24 | 2506.24 | 0.00   | 0.70     | 8.E-15 |
| P46781 | HIDFSLRSPYGGGRPGRVK              | 2098.12 | 2098.12 | 0.00   | 1.62     | 8.E-15 |
| P02545 | NIYSEELRETK                      | 1380.69 | 1380.69 | 0.00   | 0.29     | 8.E-15 |
| P62987 | IIEPSLRQLAQK                     | 1399.81 | 1394.82 | 4.99   | 3565.88  | 8.E-15 |

|        |                       |         |         |       |          |        |
|--------|-----------------------|---------|---------|-------|----------|--------|
| Q15393 | KLEDIRTRYAF           | 1412.69 | 1410.76 | 1.93  | 1363.06  | 8.E-15 |
| Q15393 | KLEDIRTRYAF           | 1410.76 | 1410.76 | 0.00  | 1.40     | 8.E-15 |
| Q96DI7 | IFQGNVHNFEK           | 1336.65 | 1331.66 | 4.99  | 3736.55  | 8.E-15 |
| Q96DI7 | IFQGNVHNFEK           | 1333.79 | 1331.66 | 2.13  | 1600.61  | 8.E-15 |
| Q96DI7 | IFQGNVHNFEK           | 1331.66 | 1331.66 | 0.00  | 0.66     | 8.E-15 |
| O95816 | HATRIIDEVVNK          | 1393.75 | 1393.77 | -0.02 | -13.66   | 8.E-15 |
| Q5T6W2 | IIPBLEEQHYK           | 1532.79 | 1532.79 | 0.00  | 2.63     | 9.E-15 |
| Q5T6W2 | IIPBLEEQHYK           | 1530.83 | 1532.79 | -1.96 | -1279.49 | 9.E-15 |
| P62701 | VRTDITYPAGFMDVISIDK   | 2142.18 | 2140.09 | 2.09  | 974.24   | 9.E-15 |
| P62701 | VRTDITYPAGFMDVISIDK   | 2140.09 | 2140.09 | 0.00  | -0.14    | 9.E-15 |
| P50995 | NTPAFFAERLNK          | 1406.73 | 1406.73 | 0.00  | 2.47     | 9.E-15 |
| P05388 | AIRGHLENNPALEK        | 1561.84 | 1560.84 | 1.00  | 643.28   | 9.E-15 |
| P62753 | LIEVDDERK             | 1117.59 | 1115.58 | 2.01  | 1797.24  | 9.E-15 |
| P16403 | ERSGVSLAALKK          | 1258.75 | 1257.74 | 1.01  | 798.69   | 9.E-15 |
| P05787 | TEISEMNRNISRLQAEIEGLK | 2430.26 | 2430.25 | 0.01  | 2.53     | 9.E-15 |

|        |                                        |         |         |       |          |        |
|--------|----------------------------------------|---------|---------|-------|----------|--------|
| P05787 | TEISEMNRNISRLQAEIEGLK                  | 2430.22 | 2430.25 | -0.03 | -13.19   | 9.E-15 |
| P02545 | NIYSEELRETK                            | 1375.74 | 1380.69 | -4.95 | -3600.18 | 9.E-15 |
| P62906 | FLETVELQISLK                           | 1418.80 | 1418.80 | 0.00  | 0.95     | 1.E-14 |
| P02545 | LESTESRSSFSQHARTSGRVAVEEVDEEGK         | 3306.57 | 3306.57 | 0.00  | -0.36    | 1.E-14 |
| P19338 | GFGFVDFNSEEDAK                         | 1558.80 | 1560.67 | -1.87 | -1201.77 | 1.E-14 |
| P35659 | LLYNRPGTVSSLK                          | 1446.80 | 1446.82 | -0.02 | -13.58   | 1.E-14 |
| Q96JM3 | LLEDTLFPSSK                            | 1248.66 | 1248.66 | 0.00  | 1.73     | 1.E-14 |
| P16403 | ASGPPVSELITK                           | 1197.66 | 1197.66 | 0.00  | -0.06    | 1.E-14 |
| P16403 | ASGPPVSELITK                           | 1197.65 | 1197.66 | -0.01 | -12.34   | 1.E-14 |
| P16403 | ERSGVSLAALK                            | 1132.65 | 1129.65 | 3.00  | 2648.93  | 1.E-14 |
| P08107 | AQIHDLVLVGGSTRIPK                      | 1803.04 | 1803.04 | 0.00  | 0.15     | 1.E-14 |
| P25205 | (41)AGTVVLDDELREARQDYLDLDFLDEEDQGIYQSK | 3985.86 | 3985.87 | -0.01 | -1.47    | 1.E-14 |
| P26599 | NFQNIFFPSATLHLSNIPPSVSEEDLK            | 2993.52 | 2993.51 | 0.01  | 2.37     | 1.E-14 |
| P26599 | NFQNIFFPSATLHLSNIPPSVSEEDLK            | 2993.44 | 2993.51 | -0.07 | -21.72   | 1.E-14 |
| P62988 | ESTLHLVLRIRGG                          | 1449.84 | 1449.84 | 0.00  | 0.37     | 1.E-14 |

|        |                     |         |         |       |          |        |
|--------|---------------------|---------|---------|-------|----------|--------|
| Q15050 | EWLIEVPGNADPLEDQFAK | 2170.07 | 2170.06 | 0.01  | 4.38     | 1.E-14 |
| P07900 | HSQFIGYPITLFVEK     | 1781.94 | 1777.94 | 4.00  | 2243.69  | 1.E-14 |
| P07900 | HSQFIGYPITLFVEK     | 1777.94 | 1777.94 | 0.00  | -0.38    | 1.E-14 |
| P35659 | LLYNRPGTVSSLK       | 1446.82 | 1446.82 | 0.00  | 1.35     | 1.E-14 |
| P14136 | VRFLEQQNK           | 1160.63 | 1160.63 | 0.00  | -0.43    | 1.E-14 |
| Q9NW64 | DRYYGINDPVADK       | 1528.82 | 1524.72 | 4.10  | 2679.17  | 1.E-14 |
| Q9NW64 | DRYYGINDPVADK       | 1526.84 | 1524.72 | 2.12  | 1391.27  | 1.E-14 |
| Q9NW64 | DRYYGINDPVADK       | 1526.81 | 1524.72 | 2.09  | 1367.86  | 1.E-14 |
| A6NI71 | LRVDIRPQLLK         | 1349.85 | 1349.85 | 0.00  | -0.43    | 1.E-14 |
| P08758 | TLFGRDLLDDLK        | 1404.76 | 1404.76 | 0.00  | 0.11     | 1.E-14 |
| P08758 | TLFGRDLLDDLK        | 1404.73 | 1404.76 | -0.03 | -18.33   | 1.E-14 |
| P23396 | GGKPEPPAMPQPVPTA    | 1572.80 | 1572.80 | 0.00  | 0.27     | 1.E-14 |
| P02545 | NIYSEELRETK         | 1383.70 | 1380.69 | 3.01  | 2175.33  | 1.E-14 |
| P62753 | LIEVDDERK           | 1115.58 | 1115.58 | 0.00  | 0.69     | 1.E-14 |
| P62753 | LIEVDDERK           | 1111.63 | 1115.58 | -3.95 | -3550.47 | 1.E-14 |

|        |                     |         |         |       |          |        |
|--------|---------------------|---------|---------|-------|----------|--------|
| P19338 | GFGFVDFNSEEDAK      | 1560.67 | 1560.67 | 0.00  | 0.57     | 1.E-14 |
| P20700 | EELRELNDR LAVYIDK   | 1975.04 | 1975.04 | 0.00  | -0.92    | 1.E-14 |
| P19338 | EVFEDAAEIRLVSK      | 1604.84 | 1604.84 | 0.00  | -0.40    | 1.E-14 |
| P07355 | AYTNFDAERDALNIETAIK | 2154.06 | 2154.06 | 0.00  | 2.15     | 1.E-14 |
| Q12874 | PLQDQNELFGK         | 1287.65 | 1287.65 | 0.00  | 2.26     | 1.E-14 |
| Q99848 | PGLNVVLEGPCK        | 1249.74 | 1249.74 | 0.00  | 0.89     | 1.E-14 |
| Q08945 | SDHPGISITDLSK       | 1368.64 | 1368.69 | -0.05 | -35.72   | 1.E-14 |
| P61247 | VERADGYEPPVQESV     | 1673.79 | 1673.79 | 0.00  | -0.45    | 1.E-14 |
| P61247 | VERADGYEPPVQESV     | 1673.76 | 1673.79 | -0.03 | -18.61   | 1.E-14 |
| P16403 | ASGPPVSELITK        | 1193.59 | 1197.66 | -4.07 | -3407.17 | 1.E-14 |
| Q8IWX8 | IARLLQLWEK          | 1268.76 | 1268.76 | 0.00  | 1.05     | 1.E-14 |
| Q9NW64 | DRYYGINDPVADK       | 1526.75 | 1524.72 | 2.03  | 1329.98  | 1.E-14 |
| P14136 | VRFLEQQNK           | 1160.63 | 1160.63 | 0.00  | 0.69     | 2.E-14 |
| P14136 | VRFLEQQNK           | 1160.61 | 1160.63 | -0.02 | -13.09   | 2.E-14 |
| P14136 | VRFLEQQNK           | 1156.65 | 1160.63 | -3.98 | -3445.04 | 2.E-14 |

|        |                         |         |         |        |          |        |
|--------|-------------------------|---------|---------|--------|----------|--------|
| P08670 | VESLQEEIAFLK            | 1404.75 | 1404.75 | 0.00   | 0.84     | 2.E-14 |
| P08670 | VESLQEEIAFLK            | 1404.73 | 1404.75 | -0.02  | -12.82   | 2.E-14 |
| Q562R8 | LRVAPEEHPVLLTEAPLNPK    | 2351.29 | 2222.24 | 129.05 | 54884.20 | 2.E-14 |
| O43143 | IIPLYSTLPPQQQRIFEP PPPK | 2688.49 | 2686.48 | 2.01   | 746.44   | 2.E-14 |
| P07355 | SYSPYDMLESIRK           | 1587.85 | 1587.76 | 0.09   | 56.38    | 2.E-14 |
| P07355 | SYSPYDMLESIRK           | 1587.76 | 1587.76 | 0.00   | 2.28     | 2.E-14 |
| Q9H307 | (41)AVAVRTLQE QLEK      | 1525.85 | 1525.85 | 0.00   | 1.37     | 2.E-14 |
| P46777 | AHAAIRENPVYEK           | 1496.77 | 1496.77 | 0.00   | 2.04     | 2.E-14 |
| Q9UHX1 | LGLPPLTPEQQEALQK        | 1763.98 | 1760.97 | 3.01   | 1708.06  | 2.E-14 |
| Q9UHX1 | LGLPPLTPEQQEALQK        | 1760.98 | 1760.97 | 0.01   | 2.89     | 2.E-14 |
| Q5T6W2 | IIP TLEEQHYK            | 1535.85 | 1532.79 | 3.06   | 1993.90  | 2.E-14 |
| Q5T6W2 | IIP TLEEQHYK            | 1535.81 | 1532.79 | 3.02   | 1964.59  | 2.E-14 |
| Q5T6W2 | IIP TLEEQHYK            | 1534.79 | 1532.79 | 2.00   | 1300.20  | 2.E-14 |
| Q96SI9 | VILTSPLIRDELEK          | 1625.92 | 1624.94 | 0.98   | 601.30   | 2.E-14 |
| Q9NW64 | DRYYGINDPVADK           | 1524.72 | 1524.72 | 0.00   | 2.33     | 2.E-14 |

|        |                     |         |         |       |          |        |
|--------|---------------------|---------|---------|-------|----------|--------|
| Q08945 | SDHPGISITDLSK       | 1368.69 | 1368.69 | 0.00  | 0.30     | 2.E-14 |
| P08758 | VLTEIIASRTPEELRAIK  | 2041.19 | 2038.18 | 3.01  | 1475.02  | 2.E-14 |
| P09661 | KGGPSPGDVEAIK       | 1255.69 | 1253.66 | 2.03  | 1612.72  | 2.E-14 |
| P0C0S8 | VTIAQGGVLPNIQAVLLPK | 1930.16 | 1930.16 | 0.00  | -0.72    | 2.E-14 |
| P0C0S8 | VTIAQGGVLPNIQAVLLPK | 1930.12 | 1930.16 | -0.04 | -20.09   | 2.E-14 |
| Q9H081 | QALLAELEEQK         | 1271.70 | 1270.68 | 1.02  | 803.68   | 2.E-14 |
| Q9H081 | QALLAELEEQK         | 1271.68 | 1270.68 | 1.00  | 789.46   | 2.E-14 |
| P16403 | ERSGVSLAALK         | 1132.65 | 1129.65 | 3.00  | 2648.67  | 2.E-14 |
| P16403 | ERSGVSLAALK         | 1129.65 | 1129.65 | 0.00  | 0.27     | 2.E-14 |
| P16403 | ERSGVSLAALK         | 1129.64 | 1129.65 | -0.01 | -10.71   | 2.E-14 |
| P16403 | ERSGVSLAALK         | 1125.57 | 1129.65 | -4.08 | -3623.50 | 2.E-14 |
| P02545 | NIYSEELRETK         | 1380.69 | 1380.69 | 0.00  | -0.07    | 2.E-14 |
| P19338 | EVFEDAAEIRLVSK      | 1604.84 | 1604.84 | 0.00  | 0.16     | 2.E-14 |
| O43390 | IPRDLYEDELVPLFEK    | 1975.03 | 1975.03 | 0.00  | -1.77    | 2.E-14 |
| P49736 | IFASIAPSIYGHEDIK    | 1759.92 | 1759.91 | 0.01  | 4.12     | 2.E-14 |

|        |                            |         |         |        |          |        |
|--------|----------------------------|---------|---------|--------|----------|--------|
| Q9NVP1 | NLQCLVIDEADRILDVGFEEELK    | 2717.37 | 2717.36 | 0.01   | 2.56     | 2.E-14 |
| P02545 | EGDLIAAQARLK               | 1283.72 | 1283.72 | 0.00   | 2.25     | 2.E-14 |
| P04083 | ALTGHLEEVVLALLK            | 1604.95 | 1604.95 | 0.00   | 0.88     | 2.E-14 |
| Q86V81 | LLVSNLDFGVSDADIQELFAEFGTLK | 2841.45 | 2840.45 | 1.00   | 352.24   | 2.E-14 |
| P07355 | DIISDTSGDFRK               | 1353.70 | 1352.66 | 1.04   | 766.95   | 2.E-14 |
| P07355 | DIISDTSGDFRK               | 1352.66 | 1352.66 | 0.00   | 2.67     | 2.E-14 |
| P46781 | QVVNIPSFIVRLDSQK           | 1825.01 | 1842.04 | -17.03 | -9328.88 | 2.E-14 |
| P63261 | (44)EEEIAALVIDNGSGMCK      | 1890.87 | 1876.85 | 14.02  | 7414.94  | 2.E-14 |
| P63261 | (44)EEEIAALVIDNGSGMCK      | 1890.83 | 1876.85 | 13.98  | 7395.78  | 2.E-14 |
| P62701 | GRFAVHRITPEEAK             | 1609.87 | 1609.87 | 0.00   | 0.97     | 3.E-14 |
| P16403 | ERSGVSLAALK                | 1129.65 | 1129.65 | 0.00   | 0.27     | 3.E-14 |
| Q09666 | GEGPEVDVNLPK               | 1255.71 | 1252.63 | 3.08   | 2449.38  | 3.E-14 |
| Q09666 | GEGPEVDVNLPK               | 1252.63 | 1252.63 | 0.00   | 2.00     | 3.E-14 |
| Q09666 | GEGPEVDVNLPK               | 1251.62 | 1252.63 | -1.01  | -809.59  | 3.E-14 |
| P04083 | ALTGHLEEVVLALLK            | 1604.95 | 1604.95 | 0.00   | 0.88     | 3.E-14 |



|        |                      |         |         |       |          |        |
|--------|----------------------|---------|---------|-------|----------|--------|
| Q9UKX7 | LQQUESTFLFHGNK       | 1547.77 | 1547.77 | 0.00  | 2.31     | 3.E-14 |
| P50995 | NTPAFFAERLNK         | 1406.73 | 1406.73 | 0.00  | 2.26     | 3.E-14 |
| Q08945 | SDHPGISITDLSK        | 1371.70 | 1368.69 | 3.01  | 2195.83  | 3.E-14 |
| Q08945 | SDHPGISITDLSK        | 1366.67 | 1368.69 | -2.02 | -1481.33 | 3.E-14 |
| P62701 | VRTDITYPAGFMDVISIDK  | 2142.18 | 2140.09 | 2.09  | 974.71   | 3.E-14 |
| Q07020 | ILTFDQLALDSPK        | 1459.79 | 1459.79 | 0.00  | -0.15    | 3.E-14 |
| Q07020 | ILTFDQLALDSPK        | 1459.77 | 1459.79 | -0.02 | -15.22   | 3.E-14 |
| Q07020 | ILTFDQLALDSPK        | 1459.75 | 1459.79 | -0.04 | -30.02   | 3.E-14 |
| P49736 | VAVGELTDEDVK         | 1273.64 | 1273.64 | 0.00  | 1.47     | 3.E-14 |
| Q08211 | NFLYAWCGK            | 1160.64 | 1157.53 | 3.11  | 2678.44  | 3.E-14 |
| Q08211 | NFLYAWCGK            | 1157.53 | 1157.53 | 0.00  | 1.13     | 3.E-14 |
| Q08211 | NFLYAWCGK            | 1155.60 | 1157.53 | -1.93 | -1671.33 | 3.E-14 |
| Q15029 | TATITEPRGNEEAQIFRPLK | 2270.21 | 2270.20 | 0.01  | 2.31     | 3.E-14 |
| P61313 | AIRRNPDQTWITK        | 1597.87 | 1597.87 | 0.00  | -0.10    | 3.E-14 |
| P61313 | AIRRNPDQTWITK        | 1597.84 | 1597.87 | -0.03 | -16.74   | 3.E-14 |

|        |                         |         |         |       |          |        |
|--------|-------------------------|---------|---------|-------|----------|--------|
| P23396 | GGKPEPPAMPQPVPTA        | 1569.78 | 1572.80 | -3.02 | -1926.76 | 3.E-14 |
| P23396 | GGKPEPPAMPQPVPTA        | 1569.70 | 1572.80 | -3.10 | -1972.97 | 3.E-14 |
| P36578 | AFRNIPGITLLNVSK         | 1641.96 | 1641.96 | 0.00  | 1.65     | 3.E-14 |
| P36578 | AFRNIPGITLLNVSK         | 1641.94 | 1641.96 | -0.02 | -10.11   | 3.E-14 |
| Q9BQ39 | VLVLAPTRELANQVAK        | 1721.02 | 1721.02 | 0.00  | 0.17     | 3.E-14 |
| Q9H307 | (41)AVAVRTLQEQLEK       | 1528.81 | 1525.85 | 2.96  | 1934.44  | 3.E-14 |
| Q02539 | SLVSKGTLVQTK            | 1259.74 | 1259.74 | 0.00  | 0.96     | 3.E-14 |
| Q8TAQ2 | VERDIGEGNLSTAAAAALAAAVK | 2268.21 | 2268.21 | 0.00  | 0.04     | 3.E-14 |
| P09651 | RGFAFVTFDDHDSVDK        | 1854.85 | 1854.85 | 0.00  | 2.25     | 3.E-14 |
| P09651 | RGFAFVTFDDHDSVDK        | 1850.86 | 1854.85 | -3.99 | -2157.29 | 3.E-14 |
| P14866 | SERSSSGLLEWESK          | 1596.86 | 1593.76 | 3.10  | 1942.78  | 3.E-14 |
| P14866 | SERSSSGLLEWESK          | 1593.76 | 1593.76 | 0.00  | 2.92     | 3.E-14 |
| Q96SI9 | VILTSPLIRDELEK          | 1624.94 | 1624.94 | 0.00  | 0.41     | 3.E-14 |
| Q96SI9 | VILTSPLIRDELEK          | 1622.95 | 1624.94 | -1.99 | -1228.34 | 3.E-14 |
| Q96SI9 | VILTSPLIRDELEK          | 1622.88 | 1624.94 | -2.06 | -1270.36 | 3.E-14 |

|        |                                   |         |         |       |          |        |
|--------|-----------------------------------|---------|---------|-------|----------|--------|
| P62736 | AGFAGDDAPRAVFPISIVGRPRHQGVMVGMGQK | 3307.69 | 3307.68 | 0.01  | 3.05     | 4.E-14 |
| O14979 | VFVGGLSPDTSEEQIK                  | 1704.87 | 1704.86 | 0.01  | 3.23     | 4.E-14 |
| O14979 | VFVGGLSPDTSEEQIK                  | 1704.83 | 1704.86 | -0.03 | -16.89   | 4.E-14 |
| P0C0S8 | VTIAQGGVLPNIQAVLLPK               | 1930.16 | 1930.16 | 0.00  | 0.58     | 4.E-14 |
| P0C0S8 | VTIAQGGVLPNIQAVLLPK               | 1930.12 | 1930.16 | -0.04 | -20.35   | 4.E-14 |
| P61313 | FFEVLIDPFHK                       | 1503.81 | 1503.81 | 0.00  | -0.30    | 4.E-14 |
| P16403 | ERSGVSLAALK                       | 1125.57 | 1129.65 | -4.08 | -3623.32 | 4.E-14 |
| Q6P5A3 | TLLSRIAENLPK                      | 1353.80 | 1353.80 | 0.00  | 0.83     | 4.E-14 |
| Q9H6F5 | AEVVQVIRNPAK                      | 1322.77 | 1322.77 | 0.00  | 2.57     | 4.E-14 |
| Q9H6F5 | AEVVQVIRNPAK                      | 1322.71 | 1322.77 | -0.06 | -41.66   | 4.E-14 |
| P62701 | VRTDITYPAGFMDVISIDK               | 2140.09 | 2140.09 | 0.00  | 0.42     | 4.E-14 |
| O75934 | HIQDLNWQRK                        | 1337.69 | 1336.70 | 0.99  | 740.90   | 4.E-14 |
| P09651 | GGNFGGRSSGPYGGGGQYFAK             | 2022.93 | 2019.92 | 3.01  | 1490.26  | 4.E-14 |
| Q02539 | SLVSKGTLVQTK                      | 1264.72 | 1259.74 | 4.98  | 3937.63  | 4.E-14 |
| Q02539 | SLVSKGTLVQTK                      | 1264.62 | 1259.74 | 4.88  | 3859.26  | 4.E-14 |

|        |                                      |         |         |       |          |        |
|--------|--------------------------------------|---------|---------|-------|----------|--------|
| P42566 | (41)AAAAQLSLTQLSSGNPVYEK             | 2090.10 | 2089.07 | 1.03  | 493.68   | 4.E-14 |
| P26373 | LILFPRKPSAPK                         | 1365.85 | 1365.85 | 0.00  | 0.44     | 4.E-14 |
| P32969 | DELILEGNDIELVSNAAALIQQATTVK          | 2883.51 | 2883.51 | 0.00  | 0.57     | 4.E-14 |
| P09661 | IPVIENLGATLDQFDAIDFSDNEIRK           | 2934.49 | 2932.48 | 2.01  | 684.80   | 4.E-14 |
| P68104 | IGGIGTVPVGRVETGVLKPGMVVTFAPVNVTTTEVK | 3536.98 | 3520.97 | 16.01 | 4525.36  | 4.E-14 |
| Q8WYN9 | (49)MIPPDQQLIFAGK                    | 1649.90 | 1654.89 | -4.99 | -3027.41 | 4.E-14 |
| Q9HC52 | ELPDPSQRPLGEPGAGLGEYLK               | 2352.21 | 2352.20 | 0.01  | 3.07     | 4.E-14 |
| P08107 | AQIHDLVLVGGSTRIPK                    | 1803.04 | 1803.04 | 0.00  | 0.21     | 5.E-14 |
| Q9BTD8 | (41)AGAGPAPGLPGAGGPVVPGGAGIPGK       | 2217.20 | 2217.19 | 0.01  | 4.27     | 5.E-14 |
| Q96IZ7 | ARLQLVLEAAK                          | 1281.78 | 1281.78 | 0.00  | 2.31     | 5.E-14 |
| P62081 | VETFSGVYK                            | 1028.52 | 1028.52 | 0.00  | 1.12     | 5.E-14 |
| P62081 | VETFSGVYK                            | 1028.51 | 1028.52 | -0.01 | -10.64   | 5.E-14 |
| P20700 | DAALATALGDKK                         | 1176.61 | 1172.64 | 3.97  | 3373.45  | 5.E-14 |
| P20700 | DAALATALGDKK                         | 1172.64 | 1172.64 | 0.00  | 2.16     | 5.E-14 |
| P09661 | KGGPSPGDVEAIK                        | 1255.69 | 1253.66 | 2.03  | 1612.96  | 5.E-14 |

|        |                              |         |         |      |         |        |
|--------|------------------------------|---------|---------|------|---------|--------|
| P02545 | AGQVVTIWAAGAGATHSPPTDLVWK    | 2532.31 | 2532.31 | 0.00 | 0.50    | 5.E-14 |
| P51991 | RAVSREDSVKPGAHLTVK           | 1949.08 | 1949.08 | 0.00 | 0.97    | 5.E-14 |
| O43390 | VLFVRNLATTVTEEILEK           | 2074.17 | 2074.17 | 0.00 | -1.09   | 5.E-14 |
| P20700 | ESRACLERIQELEDLLAK           | 2172.12 | 2172.12 | 0.00 | 0.12    | 5.E-14 |
| O60506 | ALLERTGYTLDVTTGQRK           | 2025.07 | 2021.09 | 3.98 | 1967.08 | 6.E-14 |
| O60506 | ALLERTGYTLDVTTGQRK           | 2021.93 | 2021.09 | 0.84 | 417.21  | 6.E-14 |
| P62906 | FLETVELQISLK                 | 1418.80 | 1418.80 | 0.00 | 1.16    | 6.E-14 |
| O75934 | HIQDLNWQRK                   | 1336.70 | 1336.70 | 0.00 | 1.04    | 6.E-14 |
| Q09028 | TVALWDLRNLK                  | 1327.76 | 1327.76 | 0.00 | 1.81    | 6.E-14 |
| P20700 | LLEGEEERLK                   | 1217.63 | 1214.65 | 2.98 | 2451.03 | 6.E-14 |
| P09651 | RAVSREDSQRPGAHLTVK           | 2006.08 | 2006.08 | 0.00 | 0.78    | 6.E-14 |
| P08758 | (41)AQLRGTVTDFPGFDERADAETLRK | 2837.37 | 2833.44 | 3.93 | 1384.83 | 6.E-14 |
| P08758 | (41)AQLRGTVTDFPGFDERADAETLRK | 2833.44 | 2833.44 | 0.00 | 1.08    | 6.E-14 |
| O60506 | ALLERTGYTLDVTTGQRK           | 2021.09 | 2021.09 | 0.00 | 0.24    | 6.E-14 |
| P22626 | IDTIEIITDRQSGK               | 1587.85 | 1587.85 | 0.00 | 2.28    | 6.E-14 |

|        |                                 |         |         |       |          |        |
|--------|---------------------------------|---------|---------|-------|----------|--------|
| P22626 | IDTIEIITDRQSGK                  | 1585.77 | 1587.85 | -2.08 | -1314.18 | 6.E-14 |
| P16403 | ERSGVSLAALK                     | 1131.66 | 1129.65 | 2.01  | 1773.69  | 6.E-14 |
| P16403 | ERSGVSLAALK                     | 1129.65 | 1129.65 | 0.00  | 0.27     | 6.E-14 |
| P16403 | ERSGVSLAALK                     | 1129.64 | 1129.65 | -0.01 | -11.50   | 6.E-14 |
| O60812 | LKGDDLQAIK                      | 1099.62 | 1099.62 | 0.00  | 0.28     | 6.E-14 |
| O60812 | LKGDDLQAIK                      | 1099.61 | 1099.62 | -0.01 | -11.91   | 6.E-14 |
| Q14978 | RGAAGDWGERANQVLK                | 1727.90 | 1726.89 | 1.01  | 582.57   | 6.E-14 |
| Q92922 | AALEEF SRVREEVPLELVEAHVK        | 2651.42 | 2649.41 | 2.01  | 756.37   | 6.E-14 |
| P62701 | GNKPWISLPRGK                    | 1353.69 | 1351.77 | 1.92  | 1419.80  | 7.E-14 |
| P62701 | GNKPWISLPRGK                    | 1351.77 | 1351.77 | 0.00  | 0.72     | 7.E-14 |
| Q96125 | KSDSNPLTEILK                    | 1345.74 | 1343.73 | 2.01  | 1494.40  | 7.E-14 |
| Q96125 | KSDSNPLTEILK                    | 1344.68 | 1343.73 | 0.95  | 709.37   | 7.E-14 |
| Q96125 | KSDSNPLTEILK                    | 1343.73 | 1343.73 | 0.00  | 2.96     | 7.E-14 |
| O60506 | IPRDLFEDELVPLFEK                | 1959.04 | 1959.04 | 0.00  | -0.24    | 7.E-14 |
| P39023 | LDWARERLEQQVPVNQVFGQDEMIDVIGVTK | 3616.98 | 3611.84 | 5.14  | 1419.79  | 7.E-14 |

|        |                                            |         |         |        |           |        |
|--------|--------------------------------------------|---------|---------|--------|-----------|--------|
| P08758 | (41)AQVLRGTVTDFPGFDERADAETLRK              | 2837.37 | 2833.44 | 3.93   | 1384.05   | 7.E-14 |
| P08758 | (41)AQVLRGTVTDFPGFDERADAETLRK              | 2833.44 | 2833.44 | 0.00   | 1.01      | 7.E-14 |
| P62241 | ELEFYLRK                                   | 1096.59 | 1096.59 | 0.00   | 0.30      | 7.E-14 |
| P46782 | TIAECLADELINAAGSSNSYAIK                    | 2446.35 | 2538.26 | -91.91 | -37569.90 | 7.E-14 |
| O60264 | QTELFHFHQPAQK                              | 1727.90 | 1727.90 | 0.00   | 2.27      | 7.E-14 |
| P07910 | ME(37)SEGGADD(37)SAEEGDLLDDDDNEDRGDDQLELIK | 3885.45 | 3869.45 | 16.00  | 4116.95   | 8.E-14 |
| Q02878 | AIPQLQGYLRVVFALTNGIYPHK                    | 2585.41 | 2585.41 | 0.00   | 0.51      | 8.E-14 |
| P08758 | VLTEIIASRTPEELRAIK                         | 2038.18 | 2038.18 | 0.00   | 0.69      | 9.E-14 |
| P04792 | LATQSNEITIPVTFESRAQLGGPEAAK                | 2837.36 | 2827.47 | 9.89   | 3486.71   | 9.E-14 |
| O75643 | (41)ADVARSQYQYK                            | 1585.79 | 1584.78 | 1.01   | 633.94    | 1.E-13 |
| P20700 | HETRLVEVDSGRQIEYQYK                        | 2351.17 | 2350.16 | 1.01   | 427.57    | 1.E-13 |
| P02545 | LALDMEIHAYRK                               | 1458.77 | 1458.77 | 0.00   | 0.69      | 1.E-13 |
| Q8WVM7 | YYNDYGDIIK                                 | 1262.58 | 1262.58 | 0.00   | 1.34      | 1.E-13 |
| P20700 | LLEGEERLK                                  | 1214.65 | 1214.65 | 0.00   | 2.28      | 1.E-13 |
| P20700 | LLEGEERLK                                  | 1214.57 | 1214.65 | -0.08  | -65.48    | 1.E-13 |

|        |                       |         |         |       |         |        |
|--------|-----------------------|---------|---------|-------|---------|--------|
| Q09028 | TVALWDLRNLK           | 1327.76 | 1327.76 | 0.00  | 1.81    | 1.E-13 |
| Q09028 | TVALWDLRNLK           | 1327.74 | 1327.76 | -0.02 | -12.35  | 1.E-13 |
| P02545 | RQNGDDPLLTYRFPPK      | 1916.98 | 1915.99 | 0.99  | 514.50  | 1.E-13 |
| P16403 | (51)SETAAPAAAPPAEK    | 1520.79 | 1519.75 | 1.04  | 680.68  | 1.E-13 |
| P16403 | (51)SETAAPAAAPPAEK    | 1520.71 | 1519.75 | 0.96  | 631.86  | 1.E-13 |
| P16403 | (51)SETAAPAAAPPAEK    | 1519.78 | 1519.75 | 0.03  | 19.85   | 1.E-13 |
| P16403 | (51)SETAAPAAAPPAEK    | 1519.75 | 1519.75 | 0.00  | -1.14   | 1.E-13 |
| P16403 | (51)SETAAPAAAPPAEK    | 1519.72 | 1519.75 | -0.03 | -17.06  | 1.E-13 |
| P16403 | (51)SETAAPAAAPPAEK    | 1519.70 | 1519.75 | -0.05 | -31.80  | 1.E-13 |
| P07355 | AYTNFDAERDALNIETAIK   | 2154.06 | 2154.06 | 0.00  | 1.64    | 1.E-13 |
| P60709 | YPIE(317)HGIVTNWDDMEK | 1975.90 | 1959.90 | 16.00 | 8097.77 | 1.E-13 |
| P16403 | (51)SETAAPAAAPPAEK    | 1519.75 | 1519.75 | 0.00  | -0.28   | 1.E-13 |
| P62917 | LARASGNYATVISHNPETK   | 2028.04 | 2028.04 | 0.00  | 0.28    | 1.E-13 |
| P05787 | LVSESSDVLPK           | 1176.61 | 1172.63 | 3.98  | 3383.50 | 1.E-13 |
| P05787 | LVSESSDVLPK           | 1175.53 | 1172.63 | 2.90  | 2469.14 | 1.E-13 |



|        |                              |         |         |       |         |        |
|--------|------------------------------|---------|---------|-------|---------|--------|
| P84090 | IYVLLRRQAQQAGK               | 1642.96 | 1642.96 | 0.00  | 0.50    | 1.E-13 |
| P16403 | (51)SETAPAAPAAAPPAEK         | 1519.70 | 1519.75 | -0.05 | -32.46  | 1.E-13 |
| Q9C0B5 | AQPGVSETEEVALQPLLTPK         | 2114.53 | 2106.12 | 8.41  | 3978.89 | 1.E-13 |
| P16403 | ERSGVSLAALKK                 | 1258.75 | 1257.74 | 1.01  | 798.53  | 2.E-13 |
| P05787 | LVSESSDVLPK                  | 1173.65 | 1172.63 | 1.02  | 872.88  | 2.E-13 |
| P05787 | LVSESSDVLPK                  | 1173.62 | 1172.63 | 0.99  | 843.34  | 2.E-13 |
| P05787 | LVSESSDVLPK                  | 1172.64 | 1172.63 | 0.01  | 6.27    | 2.E-13 |
| P05787 | LVSESSDVLPK                  | 1172.60 | 1172.63 | -0.03 | -24.60  | 2.E-13 |
| P07355 | GRRAEDGSVIDYELIDQDARDLYDAGVK | 3138.53 | 3138.52 | 0.01  | 1.81    | 2.E-13 |
| P02545 | ERARLQLELSK                  | 1341.77 | 1341.77 | 0.00  | -0.61   | 2.E-13 |
| P02545 | ERARLQLELSK                  | 1341.75 | 1341.77 | -0.02 | -14.03  | 2.E-13 |
| P02545 | AGQVVTIWAAGAGATHSPPTDLVWK    | 2532.31 | 2532.31 | 0.00  | -0.14   | 2.E-13 |
| P11021 | VTHAVVTVPAYFNDAQRQATK        | 2315.20 | 2315.20 | 0.00  | -0.04   | 2.E-13 |
| P02545 | NIYSEELRETK                  | 1383.70 | 1380.69 | 3.01  | 2175.04 | 2.E-13 |
| P32969 | TILSNQTVDIPENVDTLTK          | 2112.13 | 2112.13 | 0.00  | 0.10    | 2.E-13 |

|        |                       |         |         |         |           |        |
|--------|-----------------------|---------|---------|---------|-----------|--------|
| P32969 | TILSNQTVDIPENV DITLK  | 2112.08 | 2112.13 | -0.05   | -22.72    | 2.E-13 |
| P61247 | LMELHGE GSSSGK        | 1334.69 | 1330.62 | 4.07    | 3048.06   | 2.E-13 |
| P07910 | LKGDDLQAIKK           | 1231.62 | 1227.72 | 3.90    | 3169.84   | 2.E-13 |
| P07910 | LKGDDLQAIKK           | 1227.72 | 1227.72 | 0.00    | 0.44      | 2.E-13 |
| P08670 | VESLQEEI AFLK         | 1404.75 | 1404.75 | 0.00    | 2.12      | 2.E-13 |
| P0C0S8 | TRIIPRHLQLAIRNDEELNK  | 2428.37 | 2428.37 | 0.00    | 0.89      | 2.E-13 |
| P09651 | GGNFGGRSSGPYGGGGQYFAK | 1891.83 | 2019.92 | -128.09 | -67706.20 | 2.E-13 |
| Q9Y265 | TALALIAQELGSK         | 1384.79 | 1384.79 | 0.00    | 2.71      | 2.E-13 |
| P16403 | ERSGVSLAALK           | 1129.65 | 1129.65 | 0.00    | 2.13      | 2.E-13 |
| P16403 | ERSGVSLAALK           | 1127.57 | 1129.65 | -2.08   | -1843.52  | 2.E-13 |
| P50995 | TPVLFDIYEIK           | 1340.80 | 1336.73 | 4.07    | 3038.91   | 2.E-13 |
| P50995 | TPVLFDIYEIK           | 1336.73 | 1336.73 | 0.00    | 2.15      | 2.E-13 |
| P09661 | KGGPSPGDVEAIK         | 1253.66 | 1253.66 | 0.00    | 0.62      | 2.E-13 |
| P09661 | KGGPSPGDVEAIK         | 1248.68 | 1253.66 | -4.98   | -3991.84  | 2.E-13 |
| P50995 | NTPAFFAERLNK          | 1406.73 | 1406.73 | 0.00    | 2.61      | 2.E-13 |

|        |                                     |         |         |       |          |        |
|--------|-------------------------------------|---------|---------|-------|----------|--------|
| P62701 | VNDTIQIDLETGK                       | 1445.75 | 1444.74 | 1.01  | 695.48   | 2.E-13 |
| P08758 | (41)AQVLRGTVTDFPGFDERADAETLRK       | 2837.37 | 2833.44 | 3.93  | 1384.83  | 2.E-13 |
| P08758 | (41)AQVLRGTVTDFPGFDERADAETLRK       | 2833.44 | 2833.44 | 0.00  | 1.68     | 2.E-13 |
| P08729 | LEAAIAEAEERGELALK                   | 1807.93 | 1811.96 | -4.03 | -2229.86 | 2.E-13 |
| O60506 | ALLERTGYTLDVTTGQRK                  | 2021.09 | 2021.09 | 0.00  | -0.75    | 2.E-13 |
| P61978 | ALRTDYNASVSPDSSGPERILSISADIETIGEILK | 3815.97 | 3815.98 | -0.01 | -2.60    | 2.E-13 |
| P16403 | (51)SETAPAAPAAAPPAEK                | 1519.75 | 1519.75 | 0.00  | -1.14    | 2.E-13 |
| P16403 | (51)SETAPAAPAAAPPAEK                | 1519.72 | 1519.75 | -0.03 | -17.12   | 2.E-13 |
| P09661 | TFNPGAGLPTDK                        | 1216.61 | 1216.61 | 0.00  | 0.18     | 2.E-13 |
| P20700 | EELRELNDR LAVYIDK                   | 1975.04 | 1975.04 | 0.00  | -0.56    | 2.E-13 |
| P11142 | SQIHDIVLVGGSTRIPK                   | 1819.03 | 1819.03 | 0.00  | 0.20     | 2.E-13 |
| P50914 | MTDFDRFK                            | 1062.64 | 1058.49 | 4.15  | 3901.35  | 2.E-13 |
| P61247 | LMELHGE GSSSGK                      | 1332.63 | 1330.62 | 2.01  | 1506.13  | 2.E-13 |
| P61247 | LMELHGE GSSSGK                      | 1330.66 | 1330.62 | 0.04  | 30.21    | 2.E-13 |
| P61247 | LMELHGE GSSSGK                      | 1330.62 | 1330.62 | 0.00  | 0.45     | 2.E-13 |

|        |                            |         |         |        |          |        |
|--------|----------------------------|---------|---------|--------|----------|--------|
| Q9NW64 | DRYYGINDPVADK              | 1526.75 | 1524.72 | 2.03   | 1330.38  | 2.E-13 |
| P02545 | NIYSEELRETK                | 1381.69 | 1380.69 | 1.00   | 726.72   | 2.E-13 |
| Q9Y3T9 | ERLEDLNFPEIK               | 1506.76 | 1501.78 | 4.98   | 3305.95  | 2.E-13 |
| P09661 | TFNPGAGLPTDKK              | 1344.70 | 1344.70 | 0.00   | 1.54     | 2.E-13 |
| P09661 | TFNPGAGLPTDKK              | 1341.64 | 1344.70 | -3.06  | -2281.26 | 2.E-13 |
| P61254 | FNPFVTSDRSK                | 1296.65 | 1296.65 | 0.00   | 2.75     | 2.E-13 |
| Q562R8 | LRVAPEEHPVLLTEAPLNPK       | 2351.29 | 2222.24 | 129.05 | 54883.30 | 2.E-13 |
| P12956 | KQELLEALTK                 | 1176.67 | 1171.68 | 4.99   | 4241.19  | 2.E-13 |
| P12956 | KQELLEALTK                 | 1176.66 | 1171.68 | 4.98   | 4229.00  | 2.E-13 |
| Q86V81 | LLVSNLDFGVSDADIQELFAEFGTLK | 2840.45 | 2840.45 | 0.00   | 1.29     | 3.E-13 |
| P02545 | NIYSEELRETK                | 1380.69 | 1380.69 | 0.00   | -0.14    | 3.E-13 |
| P07355 | AYTNFDAERDALNIETAIK        | 2154.06 | 2154.06 | 0.00   | 2.24     | 3.E-13 |
| P11142 | SQIHDIVLVGGSTRIPK          | 1820.98 | 1819.03 | 1.95   | 1070.77  | 3.E-13 |
| P11142 | SQIHDIVLVGGSTRIPK          | 1819.03 | 1819.03 | 0.00   | -1.01    | 3.E-13 |
| P11142 | SQIHDIVLVGGSTRIPK          | 1820.99 | 1819.03 | 1.96   | 1073.79  | 3.E-13 |

|        |                             |         |         |       |         |        |
|--------|-----------------------------|---------|---------|-------|---------|--------|
| P16401 | ATGPPVSELITK                | 1215.63 | 1211.68 | 3.95  | 3248.19 | 3.E-13 |
| P50914 | MTDFDRFK                    | 1058.49 | 1058.49 | 0.00  | 1.03    | 3.E-13 |
| P50914 | MTDFDRFK                    | 1057.62 | 1058.49 | -0.87 | -824.12 | 3.E-13 |
| P11142 | SINPDEAVAYGAAVQAAILSGDK     | 2259.14 | 2259.14 | 0.00  | -0.33   | 3.E-13 |
| Q9NW64 | DRYYGINDPVADK               | 1526.84 | 1524.72 | 2.12  | 1391.60 | 3.E-13 |
| Q9NW64 | DRYYGINDPVADK               | 1526.81 | 1524.72 | 2.09  | 1367.59 | 3.E-13 |
| Q9NW64 | DRYYGINDPVADK               | 1524.72 | 1524.72 | 0.00  | 2.59    | 3.E-13 |
| P02545 | NIYSEELRETK                 | 1382.70 | 1380.69 | 2.01  | 1454.12 | 3.E-13 |
| P04792 | LATQSNEITIPVTFESRAQLGGPEAAK | 2827.47 | 2827.47 | 0.00  | 1.40    | 3.E-13 |
| P08729 | LEAAIAEAEERGELALK           | 1811.97 | 1811.96 | 0.01  | 3.29    | 3.E-13 |
| Q8IY18 | HIEELQQALIVK                | 1424.70 | 1419.81 | 4.89  | 3430.04 | 3.E-13 |
| P39023 | PVHLTAFLGYK                 | 1244.69 | 1244.69 | 0.00  | 2.72    | 4.E-13 |
| Q9Y3T9 | ERLEDLNFPEIK                | 1505.78 | 1501.78 | 4.00  | 2655.16 | 4.E-13 |
| P11142 | SQIHDLVGGSTRIPK             | 1819.03 | 1819.03 | 0.00  | 0.31    | 4.E-13 |
| O60812 | LKGDDLQAIK                  | 1099.62 | 1099.62 | 0.00  | 0.46    | 4.E-13 |

|        |                      |         |         |       |          |        |
|--------|----------------------|---------|---------|-------|----------|--------|
| O60812 | LKGDDLQAIK           | 1099.61 | 1099.62 | -0.01 | -12.36   | 4.E-13 |
| P11021 | LYGSAGPPPTGEEDTAEK   | 1817.83 | 1817.83 | 0.00  | 1.32     | 4.E-13 |
| P62081 | AQLRELNITAAK         | 1328.77 | 1326.76 | 2.01  | 1510.70  | 4.E-13 |
| P62081 | AQLRELNITAAK         | 1326.76 | 1326.76 | 0.00  | 0.58     | 4.E-13 |
| Q92841 | APILIATDVASRGLDVEDVK | 2081.14 | 2081.14 | 0.00  | 0.92     | 4.E-13 |
| Q08211 | ETPFELIEALLK         | 1396.89 | 1401.78 | -4.89 | -3500.35 | 4.E-13 |
| P16401 | ATGPPVSELITK         | 1216.61 | 1211.68 | 4.93  | 4054.94  | 4.E-13 |
| P16401 | ATGPPVSELITK         | 1211.68 | 1211.68 | 0.00  | -0.27    | 4.E-13 |
| P16401 | ATGPPVSELITK         | 1211.65 | 1211.68 | -0.03 | -22.47   | 4.E-13 |
| P16401 | ATGPPVSELITK         | 1211.55 | 1211.68 | -0.13 | -111.28  | 4.E-13 |
| P22626 | IDTIEIITDRQSGK       | 1587.86 | 1587.85 | 0.01  | 3.29     | 4.E-13 |
| P22626 | IDTIEIITDRQSGK       | 1587.77 | 1587.85 | -0.08 | -50.43   | 4.E-13 |
| P09651 | RGFAFVTFDDHDSVDK     | 1854.85 | 1854.85 | 0.00  | 1.87     | 4.E-13 |
| P02545 | SNEDQSMGNWQIK        | 1534.81 | 1535.67 | -0.86 | -557.50  | 4.E-13 |
| Q9Y224 | AIRILVQERLTQDAVAK    | 1923.13 | 1923.13 | 0.00  | -0.05    | 4.E-13 |

|        |                                      |         |         |       |          |        |
|--------|--------------------------------------|---------|---------|-------|----------|--------|
| P60709 | ILTERGYSFTTTAEREIVRDIK               | 2597.38 | 2597.38 | 0.00  | 1.05     | 5.E-13 |
| P11142 | SQIHDLVVGSTRIK                       | 1820.98 | 1819.03 | 1.95  | 1073.24  | 5.E-13 |
| Q09161 | DGVLEEQIERLQEK                       | 1684.86 | 1684.86 | 0.00  | 0.33     | 5.E-13 |
| P46777 | GAVDGGLSIPHSTK                       | 1341.64 | 1337.69 | 3.95  | 2944.38  | 5.E-13 |
| P62917 | LARASGNYATVISHNPETK                  | 2028.04 | 2028.04 | 0.00  | 0.43     | 5.E-13 |
| P07355 | AYTNFDAERDALNIETAIK                  | 2154.06 | 2154.06 | 0.00  | 1.68     | 5.E-13 |
| P04264 | SLNNQFASFIDK                         | 1382.68 | 1382.68 | 0.00  | 2.95     | 5.E-13 |
| P04264 | SLNNQFASFIDK                         | 1380.77 | 1382.68 | -1.91 | -1381.84 | 5.E-13 |
| O15042 | NPPNQSSNERPPSLLVIETK                 | 2219.15 | 2219.15 | 0.00  | 1.04     | 5.E-13 |
| Q9Y3T9 | ERLEDLNFPEIK                         | 1501.78 | 1501.78 | 0.00  | -0.28    | 5.E-13 |
| Q7L014 | ALELSGTAVPPDLEK                      | 1539.83 | 1538.82 | 1.01  | 652.77   | 6.E-13 |
| P08107 | AQIHDLVVGSTRIK                       | 1803.04 | 1803.04 | 0.00  | -0.85    | 6.E-13 |
| Q00839 | LNTLLQRAPQCLGK                       | 1610.89 | 1610.89 | 0.00  | 1.29     | 6.E-13 |
| Q00839 | LNTLLQRAPQCLGK                       | 1607.74 | 1610.89 | -3.15 | -1962.28 | 6.E-13 |
| Q13838 | (41)AENDVDNELLDYEDDEVETAAGGDGAEAPAKK | 3391.48 | 3391.47 | 0.01  | 2.87     | 6.E-13 |

|        |                                      |         |         |       |         |        |
|--------|--------------------------------------|---------|---------|-------|---------|--------|
| O43390 | IPRDLYEDELVPLFEK                     | 1975.03 | 1975.03 | 0.00  | -1.06   | 6.E-13 |
| O43660 | QYPANQGQEVEYFVAGTHPYPPGPGVALTADTK    | 3501.70 | 3501.68 | 0.02  | 5.76    | 6.E-13 |
| P02545 | SNEDQSMGNWQIK                        | 1535.67 | 1535.67 | 0.00  | 0.16    | 6.E-13 |
| P46782 | YLPHSAGRYAAK                         | 1332.69 | 1332.69 | 0.00  | 0.87    | 6.E-13 |
| P46782 | YLPHSAGRYAAK                         | 1331.64 | 1332.69 | -1.05 | -791.24 | 6.E-13 |
| P22626 | SGNFGGSRNMGGPYGGGNYGPGGSGGSGGYGGRSRY | 3373.44 | 3357.44 | 16.00 | 4743.91 | 6.E-13 |
| P05549 | SNSNAVSAIPINK                        | 1313.69 | 1313.69 | 0.00  | 3.11    | 6.E-13 |
| P11142 | STAGDTHLGGEDFDNRMVNHFIAEFK           | 2917.36 | 2907.32 | 10.04 | 3441.65 | 6.E-13 |
| P51991 | RGFAFVTFDDHDTVDK                     | 1868.87 | 1868.87 | 0.00  | -1.38   | 6.E-13 |
| Q15393 | LGAVFNQVAFPLQYTPRK                   | 2048.12 | 2048.12 | 0.00  | 0.83    | 6.E-13 |
| O60506 | IPRDLFEDELVPLFEK                     | 1959.04 | 1959.04 | 0.00  | 0.68    | 7.E-13 |
| P08107 | LLQDFFNGRDLNK                        | 1579.82 | 1578.82 | 1.00  | 633.48  | 7.E-13 |
| P08107 | LLQDFFNGRDLNK                        | 1579.81 | 1578.82 | 0.99  | 623.80  | 7.E-13 |
| P08107 | LLQDFFNGRDLNK                        | 1579.81 | 1578.82 | 0.99  | 623.80  | 7.E-13 |
| P08107 | LLQDFFNGRDLNK                        | 1578.82 | 1578.82 | 0.00  | 0.75    | 7.E-13 |



|        |                                |         |         |       |          |        |
|--------|--------------------------------|---------|---------|-------|----------|--------|
| Q09028 | TVALWDLRNLK                    | 1327.76 | 1327.76 | 0.00  | 2.26     | 7.E-13 |
| Q92499 | TGAFSIPVIQIVYETLK              | 1878.05 | 1878.05 | 0.00  | 0.47     | 7.E-13 |
| Q92499 | TGAFSIPVIQIVYETLK              | 1878.01 | 1878.05 | -0.04 | -19.55   | 7.E-13 |
| P02545 | LESTESRSSFSQHARTSGRVAVEEVDEEGK | 3306.57 | 3306.57 | 0.00  | -1.30    | 7.E-13 |
| Q02539 | ALAAAGYDVEK                    | 1106.56 | 1106.56 | 0.00  | 1.67     | 7.E-13 |
| P16403 | ASGPPVSELITK                   | 1198.60 | 1197.66 | 0.94  | 788.27   | 8.E-13 |
| P16403 | ASGPPVSELITK                   | 1197.66 | 1197.66 | 0.00  | 1.86     | 8.E-13 |
| P08758 | VLTEIIASRTPEELRAIK             | 2038.18 | 2038.18 | 0.00  | 0.89     | 8.E-13 |
| Q08211 | ETPFELIEALLK                   | 1401.78 | 1401.78 | 0.00  | 1.86     | 8.E-13 |
| P02545 | LESTESRSSFSQHARTSGRVAVEEVDEEGK | 3306.57 | 3306.57 | 0.00  | -0.64    | 9.E-13 |
| P61254 | FNPFVTSDRSK                    | 1296.65 | 1296.65 | 0.00  | 3.83     | 9.E-13 |
| P09651 | RGFAFVTFDDHDSVDK               | 1850.86 | 1854.85 | -3.99 | -2156.09 | 9.E-13 |
| Q13435 | LIHGDLYYEGK                    | 1407.70 | 1407.70 | 0.00  | 1.20     | 9.E-13 |
| P08107 | AQIHDLVLVGGSTRIPK              | 1803.04 | 1803.04 | 0.00  | 0.15     | 9.E-13 |
| P08133 | DAYERDLEADIIGDTSGHFQK          | 2379.10 | 2379.10 | 0.00  | -0.52    | 9.E-13 |

|        |                                        |         |         |        |          |        |
|--------|----------------------------------------|---------|---------|--------|----------|--------|
| P46781 | QVWNIPSFIVRLDSQK                       | 1825.01 | 1842.04 | -17.03 | -9329.38 | 9.E-13 |
| P14136 | VRFLEQQNK                              | 1160.63 | 1160.63 | 0.00   | 2.24     | 9.E-13 |
| P20700 | HETRLVEVDSGRQIEYEEK                    | 2354.21 | 2350.16 | 4.05   | 1720.58  | 9.E-13 |
| P62136 | LNLDSIIGRLLEVQGSRPVK                   | 2164.23 | 2164.23 | 0.00   | -0.49    | 9.E-13 |
| Q9BQG0 | ARLSLVIRSPSLQSGAK                      | 1895.13 | 1895.13 | 0.00   | 1.64     | 1.E-12 |
| Q08211 | ETPFELIEALLK                           | 1402.76 | 1401.78 | 0.98   | 700.48   | 1.E-12 |
| Q9H307 | (41)AVAVRTLQEQLK                       | 1525.85 | 1525.85 | 0.00   | 1.10     | 1.E-12 |
| P62081 | DVNFEFPEFQL                            | 1383.63 | 1383.63 | 0.00   | -0.40    | 1.E-12 |
| P62081 | DVNFEFPEFQL                            | 1383.61 | 1383.63 | -0.02  | -15.15   | 1.E-12 |
| P62753 | LIEVDDERK                              | 1120.57 | 1115.58 | 4.99   | 4456.97  | 1.E-12 |
| P07910 | MESEGGADD(37)SAEEGDLLDDDDNEDRGDDQLELIK | 3805.47 | 3789.48 | 15.99  | 4202.03  | 1.E-12 |
| P62701 | VNDTIQIDLETGK                          | 1444.74 | 1444.74 | 0.00   | 1.17     | 1.E-12 |
| P09661 | IPVIENLGATLDQFDAIDFSDNEIRK             | 2932.48 | 2932.48 | 0.00   | -1.45    | 1.E-12 |
| P62753 | LIEVDDERK                              | 1115.58 | 1115.58 | 0.00   | 0.16     | 1.E-12 |
| Q14684 | TPTSSPASSPLVAK                         | 1343.68 | 1341.71 | 1.97   | 1469.18  | 1.E-12 |

|        |                     |         |         |       |         |        |
|--------|---------------------|---------|---------|-------|---------|--------|
| P12956 | KQELLEALTK          | 1171.68 | 1171.68 | 0.00  | 0.58    | 1.E-12 |
| Q99848 | PGLNVVLEGPK         | 1121.64 | 1121.64 | 0.00  | 1.05    | 1.E-12 |
| Q99848 | PGLNVVLEGPK         | 1121.63 | 1121.64 | -0.01 | -12.33  | 1.E-12 |
| P46781 | AARELLTLDEK         | 1261.70 | 1257.69 | 4.01  | 3175.29 | 1.E-12 |
| P14136 | VRFLEQQNK           | 1161.62 | 1160.63 | 0.99  | 851.06  | 1.E-12 |
| P43243 | ITPENLPQILLQLK      | 1618.97 | 1618.97 | 0.00  | 0.58    | 1.E-12 |
| P43243 | ITPENLPQILLQLK      | 1618.94 | 1618.97 | -0.03 | -15.73  | 1.E-12 |
| P16403 | ASGPPVSELITK        | 1197.66 | 1197.66 | 0.00  | 2.19    | 1.E-12 |
| Q14683 | AESLIGVYPEQGDCVISK  | 1963.96 | 1963.96 | 0.00  | 2.11    | 1.E-12 |
| P02545 | NIYSEELRETK         | 1383.70 | 1380.69 | 3.01  | 2173.10 | 1.E-12 |
| P20700 | HETRLVEVDSGRQIEYEEK | 2350.19 | 2350.16 | 0.03  | 13.49   | 1.E-12 |
| P20700 | HETRLVEVDSGRQIEYEEK | 2350.16 | 2350.16 | 0.00  | -1.02   | 1.E-12 |
| P16403 | ASGPPVSELITK        | 1197.66 | 1197.66 | 0.00  | -0.73   | 1.E-12 |
| P16403 | ASGPPVSELITK        | 1197.65 | 1197.66 | -0.01 | -11.92  | 1.E-12 |
| P16403 | ASGPPVSELITK        | 1197.63 | 1197.66 | -0.03 | -21.02  | 1.E-12 |

|        |                     |         |         |       |          |        |
|--------|---------------------|---------|---------|-------|----------|--------|
| P16403 | ASGPPVSELITK        | 1195.55 | 1197.66 | -2.11 | -1768.04 | 1.E-12 |
| P08758 | TLFGRDLLDDLK        | 1404.76 | 1404.76 | 0.00  | 0.32     | 1.E-12 |
| P14136 | VRFLEQQNK           | 1160.63 | 1160.63 | 0.00  | 0.35     | 1.E-12 |
| P07355 | TPAQYDASELK         | 1221.59 | 1221.59 | 0.00  | 2.36     | 1.E-12 |
| P07355 | TPAQYDASELK         | 1220.70 | 1221.59 | -0.89 | -726.89  | 1.E-12 |
| Q9Y5B9 | AASITSEVFNK         | 1169.65 | 1165.60 | 4.05  | 3462.17  | 1.E-12 |
| Q9Y5B9 | AASITSEVFNK         | 1165.60 | 1165.60 | 0.00  | 2.16     | 1.E-12 |
| Q9BV38 | INRDLDFDFSTRFITRPAK | 2196.19 | 2196.18 | 0.01  | 2.40     | 1.E-12 |
| P19338 | EVFEDAAEIRLVSK      | 1604.84 | 1604.84 | 0.00  | -0.71    | 1.E-12 |
| P61247 | VERADGYEPPVQESV     | 1673.79 | 1673.79 | 0.00  | -0.33    | 1.E-12 |
| P61247 | VERADGYEPPVQESV     | 1673.76 | 1673.79 | -0.03 | -18.61   | 1.E-12 |
| Q08211 | ILTTEGRNALIHK       | 1462.76 | 1464.84 | -2.08 | -1419.25 | 1.E-12 |
| P07305 | GVGASGSFRLAK        | 1155.70 | 1148.63 | 7.07  | 6116.49  | 1.E-12 |
| P62701 | DANGNSFATRLSNIFVIGK | 2024.03 | 2023.05 | 0.98  | 485.88   | 2.E-12 |
| P62753 | LIEVDDERK           | 1115.58 | 1115.58 | 0.00  | 0.78     | 2.E-12 |

|        |                                     |         |         |       |          |        |
|--------|-------------------------------------|---------|---------|-------|----------|--------|
| P62753 | LIEVDDERK                           | 1111.63 | 1115.58 | -3.95 | -3549.84 | 2.E-12 |
| O60506 | ALLERTGYTLDVTTGQRK                  | 2021.09 | 2021.09 | 0.00  | 0.28     | 2.E-12 |
| Q02539 | SLVSKGTLVQTK                        | 1264.72 | 1259.74 | 4.98  | 3937.08  | 2.E-12 |
| Q02539 | SLVSKGTLVQTK                        | 1264.62 | 1259.74 | 4.88  | 3857.21  | 2.E-12 |
| Q02539 | SLVSKGTLVQTK                        | 1259.74 | 1259.74 | 0.00  | 0.96     | 2.E-12 |
| P62753 | LIEVDDERK                           | 1115.58 | 1115.58 | 0.00  | 0.52     | 2.E-12 |
| P02545 | AGQVVTIWAAGAGATHSPPTDLVWK           | 2533.31 | 2532.31 | 1.00  | 395.43   | 2.E-12 |
| P61978 | ALRTDYNASVSPDSSGPERILSISADIETIGEILK | 3815.97 | 3815.98 | -0.01 | -3.77    | 2.E-12 |
| P62701 | VNDTIQIDLETGK                       | 1443.88 | 1444.74 | -0.86 | -599.02  | 2.E-12 |
| P07355 | GLGTDEDSLIEIICSRTNQELQEINRVYK       | 3406.71 | 3392.69 | 14.02 | 4114.34  | 2.E-12 |
| P07355 | GLGTDEDSLIEIICSRTNQELQEINRVYK       | 3395.70 | 3392.69 | 3.01  | 886.16   | 2.E-12 |
| P05787 | WSLLQQQK                            | 1031.57 | 1029.56 | 2.01  | 1947.59  | 2.E-12 |
| P05787 | WSLLQQQK                            | 1029.56 | 1029.56 | 0.00  | 2.40     | 2.E-12 |
| P46781 | AARELLTLDEK                         | 1259.71 | 1257.69 | 2.02  | 1601.21  | 2.E-12 |
| Q14157 | GGSTTGSQFLEQFK                      | 1481.87 | 1485.71 | -3.84 | -2590.68 | 2.E-12 |

|        |                                   |         |         |       |         |        |
|--------|-----------------------------------|---------|---------|-------|---------|--------|
| Q08211 | ILTTEGRNALIHK                     | 1464.84 | 1464.84 | 0.00  | 2.98    | 2.E-12 |
| Q08211 | ILTTEGRNALIHK                     | 1464.74 | 1464.84 | -0.10 | -65.97  | 2.E-12 |
| Q08211 | ILTTEGRNALIHK                     | 1464.62 | 1464.84 | -0.22 | -148.05 | 2.E-12 |
| Q9Y265 | TISHVIIGLK                        | 1084.57 | 1079.67 | 4.90  | 4516.49 | 2.E-12 |
| Q9NYF8 | DRLLASTLVHSVK                     | 1437.83 | 1437.83 | 0.00  | 1.44    | 2.E-12 |
| P19388 | IIRPSETAGRYITYRLVQ                | 2135.19 | 2135.19 | 0.00  | 0.33    | 2.E-12 |
| Q09028 | TVALWDLRNLK                       | 1327.76 | 1327.76 | 0.00  | 2.87    | 2.E-12 |
| Q16576 | GEFGGFGSVTGK                      | 1141.62 | 1141.54 | 0.08  | 65.91   | 2.E-12 |
| Q16576 | GEFGGFGSVTGK                      | 1141.54 | 1141.54 | 0.00  | 2.14    | 2.E-12 |
| O75526 | SRGFAFVTFESPADAK                  | 1728.85 | 1728.85 | 0.00  | 2.61    | 2.E-12 |
| P09012 | EVRLVPGRHDIAFVEFDNEVQAGAARDALQGFK | 3653.87 | 3653.87 | 0.00  | 0.88    | 2.E-12 |
| Q96GM8 | RALLNLPGTQTSGEAK                  | 1654.90 | 1654.90 | 0.00  | 2.90    | 2.E-12 |
| P02545 | NIYSEELRETK                       | 1380.69 | 1380.69 | 0.00  | -0.43   | 2.E-12 |
| P50995 | NTPAFFAERLNK                      | 1406.73 | 1406.73 | 0.00  | 2.61    | 2.E-12 |
| P02545 | NIYSEELRETK                       | 1380.69 | 1380.69 | 0.00  | -0.36   | 2.E-12 |

|        |                                |         |         |       |          |        |
|--------|--------------------------------|---------|---------|-------|----------|--------|
| P02545 | RQNGDDPLLTYRFPPK               | 1916.98 | 1915.99 | 0.99  | 514.34   | 2.E-12 |
| Q04695 | VRALEEANTELEVK                 | 1599.85 | 1599.85 | 0.00  | 2.83     | 2.E-12 |
| O43390 | YGGPPPDSVYSGVQPGIGTEVFGK       | 2506.24 | 2506.24 | 0.00  | 0.98     | 2.E-12 |
| P62753 | LIEVDDERK                      | 1115.58 | 1115.58 | 0.00  | 0.07     | 2.E-12 |
| P62753 | LIEVDDERK                      | 1111.63 | 1115.58 | -3.95 | -3551.10 | 2.E-12 |
| P22626 | IDTIEIITDRQSGK                 | 1587.86 | 1587.85 | 0.01  | 3.35     | 2.E-12 |
| P16403 | ASGPPVSELITK                   | 1197.66 | 1197.66 | 0.00  | 2.02     | 2.E-12 |
| P16403 | ASGPPVSELITK                   | 1195.55 | 1197.66 | -2.11 | -1767.71 | 2.E-12 |
| P02545 | LESTESRSSFSQHARTSGRVAVEEVDEEGK | 3306.57 | 3306.57 | 0.00  | -0.39    | 2.E-12 |
| P06748 | VDNDENEHQLSLRTVSLGAGAK         | 2409.19 | 2352.17 | 57.02 | 23668.80 | 2.E-12 |
| P49736 | VAVGELTDEDVK                   | 1273.64 | 1273.64 | 0.00  | 1.55     | 2.E-12 |
| Q14157 | GGSTTGSQFLEQFK                 | 1485.71 | 1485.71 | 0.00  | 1.38     | 2.E-12 |
| Q9NR30 | EGAFSNFPISEETIK                | 1667.80 | 1667.80 | 0.00  | 1.42     | 2.E-12 |
| O00148 | GLAITFVSDENDAK                 | 1482.86 | 1478.73 | 4.13  | 2782.24  | 2.E-12 |
| O00148 | GLAITFVSDENDAK                 | 1477.78 | 1478.73 | -0.95 | -644.52  | 2.E-12 |

|        |                               |         |         |       |         |        |
|--------|-------------------------------|---------|---------|-------|---------|--------|
| P08758 | (41)AQVLRGTVTDFPGFDERADAETLRK | 2833.45 | 2833.44 | 0.01  | 2.49    | 3.E-12 |
| P62701 | VNDTIQIDLETGK                 | 1446.75 | 1444.74 | 2.01  | 1389.45 | 3.E-12 |
| P62701 | VNDTIQIDLETGK                 | 1444.74 | 1444.74 | 0.00  | 0.68    | 3.E-12 |
| P84090 | (51)SHTILLVQPTK               | 1277.73 | 1277.73 | 0.00  | 0.82    | 3.E-12 |
| Q96GM8 | RALLNLPGTQTSGEAK              | 1657.85 | 1654.90 | 2.95  | 1777.78 | 3.E-12 |
| Q96GM8 | RALLNLPGTQTSGEAK              | 1656.91 | 1654.90 | 2.01  | 1213.94 | 3.E-12 |
| Q13813 | QETFDAGLQAFQQEGIANITALK       | 2492.25 | 2492.25 | 0.00  | 0.81    | 3.E-12 |
| P08107 | AQIHDLVLVGGSTRIPK             | 1803.04 | 1803.04 | 0.00  | 0.32    | 3.E-12 |
| Q14684 | TPTSSPASSPLVAK                | 1341.71 | 1341.71 | 0.00  | 0.61    | 3.E-12 |
| P16403 | ASGPPVSELITK                  | 1197.66 | 1197.66 | 0.00  | -0.81   | 3.E-12 |
| P16403 | ASGPPVSELITK                  | 1197.65 | 1197.66 | -0.01 | -11.75  | 3.E-12 |
| P13645 | VRALEESNYELEGK                | 1635.81 | 1635.81 | 0.00  | 2.58    | 3.E-12 |
| O14639 | FPAAQAPDPSETPK                | 1454.70 | 1454.70 | 0.00  | 2.60    | 3.E-12 |
| O00148 | GLAITFVSDENDAK                | 1478.73 | 1478.73 | 0.00  | 1.59    | 3.E-12 |
| O00148 | GLAITFVSDENDAK                | 1478.73 | 1478.73 | 0.00  | 1.59    | 3.E-12 |



|        |                         |         |         |        |           |        |
|--------|-------------------------|---------|---------|--------|-----------|--------|
| O00148 | GLAITFVSDENDAK          | 1478.72 | 1478.73 | -0.01  | -9.57     | 3.E-12 |
| O00148 | GLAITFVSDENDAK          | 1478.72 | 1478.73 | -0.01  | -9.57     | 3.E-12 |
| Q02539 | SLVSKGTLVQTK            | 1264.72 | 1259.74 | 4.98   | 3937.63   | 3.E-12 |
| P02545 | NIYSEELRETK             | 1382.70 | 1380.69 | 2.01   | 1451.73   | 3.E-12 |
| Q92522 | ALVQNDTLLQVK            | 1340.77 | 1340.77 | 0.00   | 1.09      | 3.E-12 |
| Q15029 | GLAEDIENEVVQITWNRK      | 2113.08 | 2113.08 | 0.00   | 1.26      | 3.E-12 |
| P22626 | IDTIEIITDRQSGK          | 1587.86 | 1587.85 | 0.01   | 3.35      | 3.E-12 |
| Q9Y265 | TISHVIIGLK              | 1079.67 | 1079.67 | 0.00   | 2.64      | 4.E-12 |
| P06748 | VDNDENEHQLSLRRTVSLGAGAK | 2354.18 | 2352.17 | 2.01   | 853.28    | 4.E-12 |
| O60812 | QKVDSLLENLEK            | 1397.74 | 1414.77 | -17.03 | -12181.30 | 4.E-12 |
| P38919 | (41)ATTATMATSGSARK      | 1394.68 | 1394.68 | 0.00   | 2.58      | 4.E-12 |
| P38919 | RDELTLEGIK              | 1172.64 | 1172.64 | 0.00   | 2.15      | 4.E-12 |
| O75643 | (41)ADVTARSLQYQYK       | 1584.78 | 1584.78 | 0.00   | 0.44      | 4.E-12 |
| P04264 | RTNAENEFVTIK            | 1420.73 | 1420.73 | 0.00   | 1.11      | 4.E-12 |
| P04264 | RTNAENEFVTIK            | 1420.71 | 1420.73 | -0.02  | -13.88    | 4.E-12 |

|        |               |         |         |       |         |        |
|--------|---------------|---------|---------|-------|---------|--------|
| Q15029 | IAVEPVNPSELPK | 1391.77 | 1391.77 | 0.00  | 1.23    | 4.E-12 |
| P14136 | VRFLEQQNK     | 1160.63 | 1160.63 | 0.00  | 0.09    | 4.E-12 |
| P11021 | PYIQVDIGGGQTK | 1379.68 | 1374.71 | 4.97  | 3601.11 | 4.E-12 |
| P11021 | PYIQVDIGGGQTK | 1377.80 | 1374.71 | 3.09  | 2244.72 | 4.E-12 |
| P11021 | PYIQVDIGGGQTK | 1374.71 | 1374.71 | 0.00  | 0.43    | 4.E-12 |
| P11021 | PYIQVDIGGGQTK | 1373.85 | 1374.71 | -0.86 | -625.76 | 4.E-12 |
| P46782 | YLPHSAGRYAAK  | 1332.69 | 1332.69 | 0.00  | 0.57    | 4.E-12 |
| Q02539 | SLVSKGTLVQTK  | 1259.74 | 1259.74 | 0.00  | 0.96    | 4.E-12 |
| P09661 | TFNPGAGLPTDKK | 1344.70 | 1344.70 | 0.00  | 0.87    | 4.E-12 |
| P14136 | VRFLEQQNK     | 1162.51 | 1160.63 | 1.88  | 1616.42 | 4.E-12 |
| P14136 | VRFLEQQNK     | 1160.63 | 1160.63 | 0.00  | 2.16    | 4.E-12 |
| P15880 | SPYQEFTDHLVK  | 1463.71 | 1462.71 | 1.00  | 686.52  | 4.E-12 |
| P16403 | ERSGVSLAALK   | 1129.65 | 1129.65 | 0.00  | 0.80    | 4.E-12 |
| P62917 | GAGSVFRAHVK   | 1127.66 | 1127.62 | 0.04  | 33.04   | 4.E-12 |
| P62917 | GAGSVFRAHVK   | 1127.62 | 1127.62 | 0.00  | 0.76    | 4.E-12 |

|        |                            |         |         |        |          |        |
|--------|----------------------------|---------|---------|--------|----------|--------|
| P54652 | DAGTITGLNVLRINEPTAAAIYGLDK | 2873.49 | 2869.55 | 3.94   | 1369.60  | 4.E-12 |
| Q9NR30 | DLIAQARTGTGK               | 1229.67 | 1229.67 | 0.00   | 0.67     | 5.E-12 |
| O60264 | QTELFAHQFQAAQK             | 1713.90 | 1727.90 | -14.00 | -8169.67 | 5.E-12 |
| O60264 | QTELFAHQFQAAQK             | 1710.88 | 1727.90 | -17.02 | -9949.97 | 5.E-12 |
| P08107 | LLQDFFNDRDLNK              | 1579.81 | 1578.82 | 0.99   | 625.83   | 5.E-12 |
| P08107 | LLQDFFNDRDLNK              | 1578.82 | 1578.82 | 0.00   | 1.64     | 5.E-12 |
| P08107 | LLQDFFNDRDLNK              | 1578.72 | 1578.82 | -0.10  | -61.45   | 5.E-12 |
| O60508 | PSLAVAVDSAPEVAVK           | 1551.85 | 1551.85 | 0.00   | 1.43     | 5.E-12 |
| P20700 | DAALATALGDKK               | 1172.64 | 1172.64 | 0.00   | -0.14    | 5.E-12 |
| Q12874 | PLQDQNELFGK                | 1287.65 | 1287.65 | 0.00   | 2.10     | 5.E-12 |
| P11940 | VDEAVAVLQAHQAK             | 1478.84 | 1477.79 | 1.05   | 708.97   | 5.E-12 |
| P32969 | TILSNQTVDIPENVDTLK         | 2112.13 | 2112.13 | 0.00   | 0.34     | 5.E-12 |
| P32969 | TILSNQTVDIPENVDTLK         | 2112.08 | 2112.13 | -0.05  | -23.52   | 5.E-12 |
| P19338 | GFGFVDFNSEEDAK             | 1560.67 | 1560.67 | 0.00   | 0.76     | 5.E-12 |
| P26599 | NFQNIFFSATLHLSNIPPSVSEEDLK | 2993.52 | 2993.51 | 0.01   | 2.57     | 5.E-12 |

|        |                                     |         |         |       |         |        |
|--------|-------------------------------------|---------|---------|-------|---------|--------|
| P02545 | NIYSEELRETK                         | 1380.69 | 1380.69 | 0.00  | 0.29    | 5.E-12 |
| P02545 | ERARLQLELSK                         | 1341.77 | 1341.77 | 0.00  | 0.20    | 5.E-12 |
| P61978 | IDEPLEGSEDRIITITGTQDQIQNAQYLLQNSVK  | 3828.95 | 3828.94 | 0.01  | 2.33    | 5.E-12 |
| P13645 | VRALEESNYELEGK                      | 1639.81 | 1635.81 | 4.00  | 2439.74 | 5.E-12 |
| P08758 | TLFGRDLLDDLK                        | 1404.76 | 1404.76 | 0.00  | 0.61    | 5.E-12 |
| O00148 | LTLHGLQQYYVK                        | 1462.88 | 1461.80 | 1.08  | 738.83  | 5.E-12 |
| P38919 | (41)ATTATMATSGSARK                  | 1394.68 | 1394.68 | 0.00  | 2.86    | 6.E-12 |
| P08107 | AQIHDLVLVGGSTRIPK                   | 1803.04 | 1803.04 | 0.00  | 0.60    | 6.E-12 |
| Q14684 | TPTSSPASSPLVAK                      | 1341.71 | 1341.71 | 0.00  | 0.84    | 6.E-12 |
| P08758 | (41)AQVLRGTVTDFPGFDERADAETLRK       | 2833.45 | 2833.44 | 0.01  | 2.28    | 6.E-12 |
| P61978 | ALRTDYNASVSPDSSGPERILSISADIETIGEILK | 3815.97 | 3815.98 | -0.01 | -2.26   | 6.E-12 |
| P84103 | VYVGNLGNNGNK                        | 1249.67 | 1247.63 | 2.04  | 1628.65 | 6.E-12 |
| P84103 | VYVGNLGNNGNK                        | 1249.64 | 1247.63 | 2.01  | 1607.64 | 6.E-12 |
| P84103 | VYVGNLGNNGNK                        | 1249.64 | 1247.63 | 2.01  | 1607.64 | 6.E-12 |
| P84103 | VYVGNLGNNGNK                        | 1249.60 | 1247.63 | 1.97  | 1577.36 | 6.E-12 |

|        |                           |         |         |       |          |        |
|--------|---------------------------|---------|---------|-------|----------|--------|
| Q14254 | ELIATVRRPAEAEAHRIQQIAEGEK | 2814.52 | 2814.51 | 0.01  | 2.07     | 6.E-12 |
| Q13148 | GISVHISNAEPK              | 1250.66 | 1250.66 | 0.00  | 2.66     | 6.E-12 |
| Q12874 | PLQDQNELFGK               | 1283.73 | 1287.65 | -3.92 | -3056.26 | 6.E-12 |
| Q13148 | GISVHISNAEPK              | 1250.66 | 1250.66 | 0.00  | 2.90     | 6.E-12 |
| P02545 | AA YEAE LGDARK            | 1292.64 | 1292.64 | 0.00  | -0.03    | 6.E-12 |
| P02545 | NIYSEELRETK               | 1375.74 | 1380.69 | -4.95 | -3600.11 | 6.E-12 |
| Q9Y265 | TISHVIIGLK                | 1084.57 | 1079.67 | 4.90  | 4516.31  | 6.E-12 |
| Q9Y265 | TISHVIIGLK                | 1079.67 | 1079.67 | 0.00  | 2.36     | 6.E-12 |
| O00148 | LTLHGLQQYYVK              | 1461.80 | 1461.80 | 0.00  | 2.40     | 6.E-12 |
| O00148 | LTLHGLQQYYVK              | 1461.78 | 1461.80 | -0.02 | -15.66   | 6.E-12 |
| P08758 | PSRLYDAYELK               | 1355.70 | 1353.69 | 2.01  | 1480.46  | 7.E-12 |
| Q96SI9 | VILTSPLIRDELEK            | 1625.92 | 1624.94 | 0.98  | 601.30   | 7.E-12 |
| P68104 | PLRLPLQDVYK               | 1342.79 | 1340.78 | 2.01  | 1497.63  | 7.E-12 |
| O43395 | DQTKPTPLILDEQGRTVDATGK    | 2382.24 | 2382.24 | 0.00  | 0.33     | 7.E-12 |
| O43390 | VTEGLVDVILYHQPDDK         | 1950.15 | 1939.99 | 10.16 | 5211.87  | 7.E-12 |

|        |                          |         |         |       |          |        |
|--------|--------------------------|---------|---------|-------|----------|--------|
| O43390 | VTEGLVDVILYHQPDDK        | 1945.20 | 1939.99 | 5.21  | 2677.69  | 7.E-12 |
| Q96GM8 | RALLNLPGTQTSGEAK         | 1657.85 | 1654.90 | 2.95  | 1777.78  | 7.E-12 |
| Q96GM8 | RALLNLPGTQTSGEAK         | 1654.91 | 1654.90 | 0.01  | 3.38     | 7.E-12 |
| Q15293 | TFDQLTPDESK              | 1280.60 | 1279.59 | 1.01  | 786.43   | 7.E-12 |
| P84103 | VYVGNLGNNGNK             | 1248.62 | 1247.63 | 0.99  | 789.17   | 7.E-12 |
| P84103 | VYVGNLGNNGNK             | 1247.66 | 1247.63 | 0.03  | 22.73    | 7.E-12 |
| P84103 | VYVGNLGNNGNK             | 1247.63 | 1247.63 | 0.00  | 1.82     | 7.E-12 |
| Q15029 | IAVEPVNPSELPK            | 1388.65 | 1391.77 | -3.12 | -2248.02 | 7.E-12 |
| O60506 | LDEIYVAGLVAHSDLDERAIEALK | 2639.38 | 2639.38 | 0.00  | -0.75    | 8.E-12 |
| O60506 | LDEIYVAGLVAHSDLDERAIEALK | 2641.43 | 2639.38 | 2.05  | 774.78   | 8.E-12 |
| Q9HC52 | ELPDPSQRPLGEPGAGLGEYLK   | 2352.21 | 2352.20 | 0.01  | 2.64     | 8.E-12 |
| O00148 | LTLHGLQQYYVK             | 1464.84 | 1461.80 | 3.04  | 2076.48  | 8.E-12 |
| Q13185 | VLDRRVVNGKVEYFLK         | 1935.10 | 1934.11 | 0.99  | 509.88   | 8.E-12 |
| P18124 | EANNFLWPFK               | 1264.73 | 1264.62 | 0.11  | 86.39    | 8.E-12 |
| P18124 | EANNFLWPFK               | 1264.62 | 1264.62 | 0.00  | 1.00     | 8.E-12 |

|        |                       |         |         |       |         |        |
|--------|-----------------------|---------|---------|-------|---------|--------|
| P05787 | WSSLQQQK              | 1029.56 | 1029.56 | 0.00  | 2.31    | 8.E-12 |
| P02545 | RQNGDDPLLTYRFPPK      | 1916.98 | 1915.99 | 0.99  | 514.60  | 8.E-12 |
| P46782 | (52)TEWETAAPAVAETPDIK | 1869.86 | 1869.90 | -0.04 | -20.49  | 8.E-12 |
| P68104 | PLRLPLQDVYK           | 1341.79 | 1340.78 | 1.01  | 750.72  | 8.E-12 |
| P84090 | (51)SHTILLVQPTK       | 1277.73 | 1277.73 | 0.00  | 0.82    | 8.E-12 |
| P18124 | EANNFLWPFK            | 1266.61 | 1264.62 | 1.99  | 1570.46 | 9.E-12 |
| P26599 | HQNVQLPREGQEDQGLTK    | 2076.04 | 2076.03 | 0.01  | 2.45    | 9.E-12 |
| P07355 | DIISDTSGDFRK          | 1353.70 | 1352.66 | 1.04  | 767.76  | 9.E-12 |
| P07355 | DIISDTSGDFRK          | 1352.66 | 1352.66 | 0.00  | 2.67    | 9.E-12 |
| O60506 | DLEGENIEIVFAKPPDQK    | 2041.04 | 2041.04 | 0.00  | 1.01    | 9.E-12 |
| P02545 | NIYSEELRETK           | 1384.37 | 1380.69 | 3.68  | 2658.11 | 9.E-12 |
| P02545 | NIYSEELRETK           | 1383.70 | 1380.69 | 3.01  | 2175.55 | 9.E-12 |
| P12956 | IQVTPPGFQLVFLPFADDK   | 2131.14 | 2131.14 | 0.00  | 1.02    | 9.E-12 |
| P16403 | ASGPPVSELITK          | 1197.66 | 1197.66 | 0.00  | 2.11    | 1.E-11 |
| Q04695 | KEPVTTRQVRTIVEEVQDGK  | 2314.27 | 2311.25 | 3.02  | 1305.23 | 1.E-11 |

|        |                                       |         |         |       |         |        |
|--------|---------------------------------------|---------|---------|-------|---------|--------|
| P02545 | NIYSEELRETK                           | 1381.70 | 1380.69 | 1.01  | 729.11  | 1.E-11 |
| P22626 | SGNFGGSRNMGGPYGGGNYGPGGSGGSGGGYGGRSRY | 3373.44 | 3357.44 | 16.00 | 4742.03 | 1.E-11 |
| P62906 | QIPRILGPGLNK                          | 1309.78 | 1304.79 | 4.99  | 3810.69 | 1.E-11 |
| P62906 | QIPRILGPGLNK                          | 1308.75 | 1304.79 | 3.96  | 3023.63 | 1.E-11 |
| P62241 | YELGRPAANTK                           | 1218.64 | 1218.64 | 0.00  | 0.85    | 1.E-11 |
| Q14254 | QVLLAQAEAEK                           | 1203.63 | 1198.66 | 4.97  | 4131.98 | 1.E-11 |
| P46782 | (52)TEWETAAPAVAETPDIK                 | 1869.90 | 1869.90 | 0.00  | -0.49   | 1.E-11 |
| P62736 | AGFAGDDAPRAVFPSIVGRPRHQVMVGMGQK       | 3307.69 | 3307.68 | 0.01  | 3.35    | 1.E-11 |
| P09661 | NAIANASTLAEVERLK                      | 1698.93 | 1698.93 | 0.00  | 0.64    | 1.E-11 |
| Q96SI9 | VILTSPLIRDELEK                        | 1624.94 | 1624.94 | 0.00  | 0.41    | 1.E-11 |
| P09012 | EVRLVPGRHDIAFVEFDNEVQAGAARDALQGFK     | 3653.87 | 3653.87 | 0.00  | -1.17   | 1.E-11 |
| Q92522 | ALVQNDTLLQVK                          | 1340.77 | 1340.77 | 0.00  | 1.09    | 1.E-11 |
| O00267 | ILNLRFLGK                             | 1072.68 | 1072.68 | 0.00  | 1.33    | 1.E-11 |
| Q9UQE7 | IRELGSLPQEAPEK                        | 1615.86 | 1615.86 | 0.00  | 2.83    | 1.E-11 |
| P08107 | LLQDFFNDRDLNK                         | 1579.81 | 1578.82 | 0.99  | 624.18  | 1.E-11 |



|        |                                  |         |         |       |         |        |
|--------|----------------------------------|---------|---------|-------|---------|--------|
| P62081 | AQLRELNITAAK                     | 1326.76 | 1326.76 | 0.00  | 0.21    | 1.E-11 |
| P08729 | LEAAIAEAEERGELALK                | 1814.95 | 1811.96 | 2.99  | 1648.67 | 1.E-11 |
| Q12906 | VADNLAIQLAAVTEDK                 | 1669.71 | 1669.89 | -0.18 | -105.24 | 1.E-11 |
| P62277 | GLTPSQIGVILRDSHGVAQVRFVTGNK      | 2859.43 | 2848.57 | 10.86 | 3796.78 | 1.E-11 |
| O95926 | (41)AAIAASEVLVDSAEEGSLAAAAELAAQK | 2697.37 | 2697.37 | 0.00  | -0.53   | 1.E-11 |
| Q04695 | KEPVTTRQVRTIVEEVQDGK             | 2311.25 | 2311.25 | 0.00  | 1.41    | 1.E-11 |
| P54652 | SENVQDLLLLDVTPLSLGIETAGGVMTPLIK  | 3253.77 | 3235.76 | 18.01 | 5534.54 | 1.E-11 |
| Q9Y3B2 | SFRPGDIVLAK                      | 1201.68 | 1201.68 | 0.00  | 1.93    | 1.E-11 |
| P08729 | WTLLEQEK                         | 1044.56 | 1044.56 | 0.00  | 2.12    | 1.E-11 |
| P69905 | LRVDPVNFK                        | 1086.62 | 1086.62 | 0.00  | 0.69    | 1.E-11 |
| O43290 | GVLQEEEDVLVNVNLVDK               | 2015.97 | 2011.05 | 4.92  | 2441.50 | 1.E-11 |
| O14639 | FPAAQAPDPSETPK                   | 1454.70 | 1454.70 | 0.00  | 3.08    | 1.E-11 |
| P02545 | NIYSEELRETK                      | 1380.69 | 1380.69 | 0.00  | -0.07   | 1.E-11 |
| P08107 | LLQDFFNGRDLNK                    | 1578.82 | 1578.82 | 0.00  | -0.77   | 1.E-11 |
| P26641 | (41)AAGTLTYPENWRAFK              | 1928.95 | 1928.94 | 0.01  | 3.21    | 1.E-11 |

|        |                                        |         |         |       |          |        |
|--------|----------------------------------------|---------|---------|-------|----------|--------|
| P41219 | MALDIEIATYRK                           | 1443.71 | 1422.75 | 20.96 | 14519.80 | 2.E-11 |
| P41219 | MALDIEIATYRK                           | 1438.75 | 1422.75 | 16.00 | 11119.50 | 2.E-11 |
| O43818 | LYLEQLRQQEEEK                          | 1704.88 | 1704.87 | 0.01  | 3.20     | 2.E-11 |
| Q9NWB6 | LAEEQLRIVEEQRK                         | 1739.95 | 1739.95 | 0.00  | 0.02     | 2.E-11 |
| Q08211 | NELMYQLEQDHDLQAILQERELLPVK             | 3180.63 | 3164.62 | 16.01 | 5032.08  | 2.E-11 |
| Q3BDU5 | LLEGEERLRLSPSPTSQRSRGRASSHSSQTQGGGSVTK | 4152.10 | 4152.10 | 0.00  | -0.19    | 2.E-11 |
| P02545 | NIYSEELRETK                            | 1377.67 | 1380.69 | -3.02 | -2194.29 | 2.E-11 |
| P08107 | LLQDFFNDRDLNK                          | 1580.85 | 1578.82 | 2.03  | 1287.21  | 2.E-11 |
| P08107 | LLQDFFNDRDLNK                          | 1579.83 | 1578.82 | 1.01  | 636.20   | 2.E-11 |
| P16403 | ERSGVSLAALK                            | 1129.65 | 1129.65 | 0.00  | 2.13     | 2.E-11 |
| Q12906 | VADNLAIQLAAVTEDK                       | 1669.89 | 1669.89 | 0.00  | -0.13    | 2.E-11 |
| P46781 | LIGEYGLRNK                             | 1161.65 | 1161.65 | 0.00  | 1.05     | 2.E-11 |
| O00148 | LTLHGLQQYYVK                           | 1463.83 | 1461.80 | 2.03  | 1385.08  | 2.E-11 |
| P27635 | IRIFDLGRK                              | 1116.68 | 1116.68 | 0.00  | 0.33     | 2.E-11 |
| P27635 | IRIFDLGRK                              | 1116.67 | 1116.68 | -0.01 | -10.87   | 2.E-11 |

|        |                       |         |         |       |          |        |
|--------|-----------------------|---------|---------|-------|----------|--------|
| Q12905 | LDPELHLDIK            | 1191.65 | 1191.65 | 0.00  | 2.43     | 2.E-11 |
| Q9Y4W2 | SPYTLDSLYWSVK         | 1557.77 | 1557.77 | 0.00  | 0.58     | 2.E-11 |
| Q9NY12 | VPYFNAPVYLENK         | 1552.79 | 1552.79 | 0.00  | 0.29     | 2.E-11 |
| Q09161 | ATNDEIFSILK           | 1249.66 | 1249.66 | 0.00  | 1.12     | 2.E-11 |
| P62906 | QIPRILGPGLNK          | 1304.79 | 1304.79 | 0.00  | -0.17    | 2.E-11 |
| P62906 | QIPRILGPGLNK          | 1304.77 | 1304.79 | -0.02 | -14.20   | 2.E-11 |
| P14866 | SERSSSGLLEWESK        | 1596.86 | 1593.76 | 3.10  | 1942.40  | 2.E-11 |
| P16403 | ERSGVSLAALK           | 1127.57 | 1129.65 | -2.08 | -1843.26 | 2.E-11 |
| P02545 | NIYSEELRETK           | 1380.69 | 1380.69 | 0.00  | 2.68     | 2.E-11 |
| Q03252 | LELEQTYQAK            | 1226.61 | 1221.62 | 4.99  | 4071.60  | 2.E-11 |
| P13010 | EDIQGFYRYSDIVPFSK     | 2070.04 | 2070.04 | 0.00  | 0.21     | 2.E-11 |
| Q9UQE7 | NDVMNLLESAGFSRSPYIYVK | 2532.24 | 2516.24 | 16.00 | 6318.00  | 2.E-11 |
| O00148 | LTLHGLQYYVK           | 1462.81 | 1461.80 | 1.01  | 689.16   | 2.E-11 |
| O00148 | LTLHGLQYYVK           | 1461.80 | 1461.80 | 0.00  | 2.68     | 2.E-11 |
| O75367 | GVTIASGGVLPNIHPELLAK  | 1985.13 | 1985.13 | 0.00  | -0.25    | 2.E-11 |

|        |                          |         |         |       |          |        |
|--------|--------------------------|---------|---------|-------|----------|--------|
| O60506 | LDEIYVAGLVAHSDLDERAIEALK | 2639.38 | 2639.38 | 0.00  | -1.58    | 2.E-11 |
| P08107 | AQIHDLVLVGGSTRIPK        | 1803.04 | 1803.04 | 0.00  | 0.60     | 2.E-11 |
| P12956 | KQELLEALTK               | 1176.67 | 1171.68 | 4.99  | 4241.36  | 3.E-11 |
| P02545 | NIYSEELRETK              | 1380.69 | 1380.69 | 0.00  | 0.87     | 3.E-11 |
| Q9NX63 | RRVAEELALEQAK            | 1511.84 | 1511.84 | 0.00  | 0.89     | 3.E-11 |
| Q9NX63 | RRVAEELALEQAK            | 1507.77 | 1511.84 | -4.07 | -2699.85 | 3.E-11 |
| Q14683 | VVQLHEYSEELEK            | 1604.83 | 1601.79 | 3.04  | 1892.86  | 3.E-11 |
| Q14683 | VVQLHEYSEELEK            | 1603.79 | 1601.79 | 2.00  | 1248.24  | 3.E-11 |
| Q14683 | VVQLHEYSEELEK            | 1601.79 | 1601.79 | 0.00  | 1.08     | 3.E-11 |
| Q04695 | KEPVTTRQVRTIVEEVQDGK     | 2313.24 | 2311.25 | 1.99  | 862.19   | 3.E-11 |
| P14866 | SERSSSGLLEWESK           | 1593.76 | 1593.76 | 0.00  | 2.98     | 3.E-11 |
| O60506 | ALLERTGYTLDVTTGQRK       | 2021.09 | 2021.09 | 0.00  | -0.75    | 3.E-11 |
| O60506 | ALLERTGYTLDVTTGQRK       | 2021.05 | 2021.09 | -0.04 | -21.04   | 3.E-11 |
| P12956 | IQVTPPGFQLVFLPFADDK      | 2131.14 | 2131.14 | 0.00  | 0.27     | 3.E-11 |
| Q14126 | IARQUESTSVLLQQSEK        | 1818.94 | 1815.97 | 2.97  | 1633.41  | 3.E-11 |

|        |                          |         |         |        |           |        |
|--------|--------------------------|---------|---------|--------|-----------|--------|
| O60506 | LDEIYVAGLVAHSDLDERAIEALK | 2641.43 | 2639.38 | 2.05   | 775.42    | 3.E-11 |
| O60506 | LDEIYVAGLVAHSDLDERAIEALK | 2639.38 | 2639.38 | 0.00   | 1.26      | 3.E-11 |
| O60506 | LDEIYVAGLVAHSDLDERAIEALK | 2637.32 | 2639.38 | -2.06  | -780.33   | 3.E-11 |
| P27635 | RLIPDGCGVK               | 1113.60 | 1113.60 | 0.00   | 0.95      | 3.E-11 |
| P27635 | RLIPDGCGVK               | 1113.59 | 1113.60 | -0.01  | -11.44    | 3.E-11 |
| P02545 | NIYSEELRETK              | 1380.69 | 1380.69 | 0.00   | 2.39      | 3.E-11 |
| P05787 | LVSESSDVLPK              | 1175.53 | 1172.63 | 2.90   | 2468.21   | 3.E-11 |
| P22626 | RGFGFVTFDDHDPVDK         | 1854.86 | 1850.86 | 4.00   | 2155.36   | 3.E-11 |
| P84103 | VYVGNLGNNGNK             | 1251.63 | 1247.63 | 4.00   | 3192.87   | 3.E-11 |
| Q03252 | LELEQTYQAK               | 1225.63 | 1221.62 | 4.01   | 3272.10   | 3.E-11 |
| O14979 | VFVGGLSPDTSEEQIK         | 1704.86 | 1704.86 | 0.00   | 0.00      | 3.E-11 |
| P22626 | IDTIEIITDRQSGK           | 1587.85 | 1587.85 | 0.00   | 1.09      | 3.E-11 |
| O43818 | LYLEQLRQEEEEK            | 1712.92 | 1704.87 | 8.05   | 4699.38   | 3.E-11 |
| P09661 | SLTYLSILRNPVTNK          | 1717.97 | 1717.97 | 0.00   | -0.03     | 3.E-11 |
| O60812 | QKVDLSLLENLEK            | 1397.74 | 1414.77 | -17.03 | -12181.70 | 4.E-11 |

|        |                                |         |         |         |           |        |
|--------|--------------------------------|---------|---------|---------|-----------|--------|
| O60812 | QKVDSLLENLEK                   | 1397.72 | 1414.77 | -17.05  | -12197.30 | 4.E-11 |
| O60812 | QKVDSLLENLEK                   | 1395.75 | 1414.77 | -19.02  | -13630.50 | 4.E-11 |
| O95232 | IDVLLQQIEELGSEGKVEEAQGMMK      | 2658.29 | 2773.39 | -115.10 | -43300.10 | 4.E-11 |
| Q12906 | YELISETGGSHDK                  | 1436.75 | 1434.66 | 2.09    | 1454.55   | 4.E-11 |
| Q12906 | YELISETGGSHDK                  | 1434.66 | 1434.66 | 0.00    | 0.30      | 4.E-11 |
| O60812 | KSDVEAIFSK                     | 1127.56 | 1122.59 | 4.97    | 4410.51   | 4.E-11 |
| Q14683 | VVQLHEYSEELEK                  | 1597.86 | 1601.79 | -3.93   | -2460.21  | 4.E-11 |
| Q86WX3 | (51)SAALLRRGLELLAASEAPRDPPGQAK | 2728.51 | 2728.50 | 0.01    | 4.11      | 4.E-11 |
| P26599 | HQNVQLPREGQEDQGLTK             | 2076.04 | 2076.03 | 0.01    | 2.70      | 4.E-11 |
| P16401 | ATGPPVSELITK                   | 1216.61 | 1211.68 | 4.93    | 4055.84   | 4.E-11 |
| P05787 | LVSESSDVLPK                    | 1176.61 | 1172.63 | 3.98    | 3384.00   | 4.E-11 |
| P05787 | LVSESSDVLPK                    | 1173.65 | 1172.63 | 1.02    | 872.96    | 4.E-11 |
| P05787 | LVSESSDVLPK                    | 1173.62 | 1172.63 | 0.99    | 843.08    | 4.E-11 |
| P05787 | LVSESSDVLPK                    | 1172.64 | 1172.63 | 0.01    | 6.87      | 4.E-11 |
| P02545 | ERARLQLELSK                    | 1341.77 | 1341.77 | 0.00    | -0.47     | 4.E-11 |

|        |                   |         |         |        |           |        |
|--------|-------------------|---------|---------|--------|-----------|--------|
| P02545 | ERARLQLELSK       | 1339.79 | 1341.77 | -1.98  | -1475.77  | 4.E-11 |
| Q15459 | VQAQVIQETIVPK     | 1454.79 | 1451.83 | 2.96   | 2038.04   | 4.E-11 |
| Q15459 | VQAQVIQETIVPK     | 1451.83 | 1451.83 | 0.00   | 1.34      | 4.E-11 |
| Q12906 | VADNLAIQLAAVTEDK  | 1671.72 | 1669.89 | 1.83   | 1095.80   | 4.E-11 |
| Q12906 | VADNLAIQLAAVTEDK  | 1669.89 | 1669.89 | 0.00   | 0.10      | 4.E-11 |
| Q12906 | VADNLAIQLAAVTEDK  | 1669.71 | 1669.89 | -0.18  | -105.36   | 4.E-11 |
| P05783 | IMADIRAQYDELARK   | 1807.93 | 1791.93 | 16.00  | 8848.68   | 4.E-11 |
| P05783 | IMADIRAQYDELARK   | 1807.90 | 1791.93 | 15.97  | 8835.74   | 4.E-11 |
| P05783 | IMADIRAQYDELARK   | 1805.96 | 1791.93 | 14.03  | 7767.11   | 4.E-11 |
| P22626 | RGFGFVTFDHDPVDK   | 1850.86 | 1850.86 | 0.00   | 1.40      | 4.E-11 |
| P20700 | EELRELNDR LAVYIDK | 1975.04 | 1975.04 | 0.00   | 0.25      | 4.E-11 |
| P62701 | PWISLPRGK         | 1052.61 | 1052.61 | 0.00   | 1.45      | 4.E-11 |
| Q03252 | LELEQTYQAK        | 1223.63 | 1221.62 | 2.01   | 1642.97   | 4.E-11 |
| Q14254 | QIAVEAQEILRTDK    | 1599.85 | 1612.88 | -13.03 | -8143.20  | 4.E-11 |
| Q14254 | QIAVEAQEILRTDK    | 1595.86 | 1612.88 | -17.02 | -10666.50 | 4.E-11 |

|        |                                 |         |         |       |         |        |
|--------|---------------------------------|---------|---------|-------|---------|--------|
| O43328 | KVEQPVIEEPALK                   | 1478.83 | 1478.83 | 0.00  | 2.16    | 4.E-11 |
| O43328 | KVEQPVIEEPALK                   | 1477.79 | 1478.83 | -1.04 | -704.57 | 4.E-11 |
| Q14978 | RGAAGDWGERANQVLK                | 1726.89 | 1726.89 | 0.00  | 1.52    | 4.E-11 |
| P20700 | HETRLVEVDSGRQIEYEEK             | 2350.16 | 2350.16 | 0.00  | -0.73   | 4.E-11 |
| P54652 | SENVQDLLLLDVTPLSLGIETAGGVMTPLIK | 3253.77 | 3235.76 | 18.01 | 5534.67 | 4.E-11 |
| P16401 | ATGPPVSELITK                    | 1215.63 | 1211.68 | 3.95  | 3248.92 | 5.E-11 |
| P16401 | ATGPPVSELITK                    | 1211.68 | 1211.68 | 0.00  | 0.72    | 5.E-11 |
| P23396 | RFGFPEGSVELYAEK                 | 1727.85 | 1727.85 | 0.00  | 0.61    | 5.E-11 |
| O60812 | VDSLLENLEK                      | 1162.69 | 1158.61 | 4.08  | 3508.07 | 5.E-11 |
| O60812 | LKGDDLQAIK                      | 1099.62 | 1099.62 | 0.00  | -0.09   | 5.E-11 |
| O43328 | KVEQPVIEEPALK                   | 1483.80 | 1478.83 | 4.97  | 3349.70 | 5.E-11 |
| O43328 | KVEQPVIEEPALK                   | 1478.83 | 1478.83 | 0.00  | 2.16    | 5.E-11 |
| P19338 | GLSEDTEETLK                     | 1321.62 | 1321.62 | 0.00  | 1.30    | 5.E-11 |
| Q9NR30 | DLIAQARTGTGK                    | 1234.65 | 1229.67 | 4.98  | 4034.27 | 5.E-11 |
| P26368 | IFVEFTSVFDCQK                   | 1626.95 | 1618.77 | 8.18  | 5026.65 | 5.E-11 |



|        |                           |         |         |       |          |        |
|--------|---------------------------|---------|---------|-------|----------|--------|
| O60508 | PSLAVAVDSAPEVAVK          | 1555.75 | 1551.85 | 3.90  | 2507.36  | 5.E-11 |
| O60508 | PSLAVAVDSAPEVAVK          | 1554.84 | 1551.85 | 2.99  | 1923.43  | 5.E-11 |
| O95785 | EVVAGAPRPGLLSLAK          | 1578.72 | 1576.93 | 1.79  | 1132.99  | 5.E-11 |
| P09651 | RSRGFGFVYATVEEVDAAMNARPHK | 2924.44 | 2908.44 | 16.00 | 5470.25  | 5.E-11 |
| P60709 | (42)DDDIAALVVDNGSGMCK     | 1838.77 | 1820.79 | 17.98 | 9779.04  | 5.E-11 |
| P60709 | (42)DDDIAALVVDNGSGMCK     | 1836.79 | 1820.79 | 16.00 | 8711.34  | 5.E-11 |
| P16401 | ATGPPVSELITK              | 1211.65 | 1211.68 | -0.03 | -22.22   | 5.E-11 |
| P16401 | ATGPPVSELITK              | 1211.55 | 1211.68 | -0.13 | -110.71  | 5.E-11 |
| P16401 | ATGPPVSELITK              | 1209.70 | 1211.68 | -1.98 | -1635.47 | 5.E-11 |
| O43390 | VLVVRNLATTVTEEILEK        | 2074.17 | 2074.17 | 0.00  | -0.85    | 6.E-11 |
| Q9UHX1 | LGLPPLTPEQQEALQK          | 1758.80 | 1760.97 | -2.17 | -1232.21 | 6.E-11 |
| A6NIM7 | TIAECLAEELINAAK           | 1648.99 | 1644.84 | 4.15  | 2517.46  | 6.E-11 |
| A6NIM7 | TIAECLAEELINAAK           | 1644.84 | 1644.84 | 0.00  | 2.10     | 6.E-11 |
| Q12906 | VADNLAIQLAAVTEDK          | 1670.79 | 1669.89 | 0.90  | 538.89   | 6.E-11 |
| P08729 | LEAAIAEAEERGELALK         | 1811.96 | 1811.96 | 0.00  | 2.30     | 6.E-11 |

|        |                         |         |         |       |          |        |
|--------|-------------------------|---------|---------|-------|----------|--------|
| O75475 | GYPHWPARVDEVPDGAVKPPTNK | 2532.31 | 2529.28 | 3.03  | 1198.47  | 6.E-11 |
| O75475 | GYPHWPARVDEVPDGAVKPPTNK | 2529.28 | 2529.28 | 0.00  | -0.47    | 6.E-11 |
| O75475 | GYPHWPARVDEVPDGAVKPPTNK | 2529.25 | 2529.28 | -0.03 | -13.36   | 6.E-11 |
| O43328 | KVEQPVIEEPALK           | 1483.80 | 1478.83 | 4.97  | 3349.23  | 6.E-11 |
| P07355 | (51)STVHEILCK           | 1127.56 | 1127.56 | 0.00  | 1.67     | 6.E-11 |
| P62081 | VETFSGVYK               | 1028.52 | 1028.52 | 0.00  | 0.73     | 6.E-11 |
| P62081 | VETFSGVYK               | 1028.51 | 1028.52 | -0.01 | -10.35   | 6.E-11 |
| P61247 | LMELHGEGSSSGK           | 1334.69 | 1330.62 | 4.07  | 3047.76  | 6.E-11 |
| P07355 | AYTNFDAERDALNIETAIK     | 2154.06 | 2154.06 | 0.00  | 1.03     | 6.E-11 |
| Q96ST2 | ILQELPSVSQETLK          | 1584.89 | 1583.88 | 1.01  | 634.93   | 7.E-11 |
| O60812 | KSDVEAIFSK              | 1122.59 | 1122.59 | 0.00  | 0.48     | 7.E-11 |
| O60812 | KSDVEAIFSK              | 1122.58 | 1122.59 | -0.01 | -11.37   | 7.E-11 |
| Q9UQE7 | MNLPGEVTFPLPLNK         | 1595.89 | 1571.84 | 24.05 | 15073.00 | 7.E-11 |
| O60812 | LKGDDLQAIK              | 1099.62 | 1099.62 | 0.00  | -0.18    | 7.E-11 |
| Q9UKV3 | ISNIVHISNLVRPFTLGQLK    | 2248.31 | 2248.31 | 0.00  | -1.22    | 7.E-11 |

|        |                      |         |         |       |          |        |
|--------|----------------------|---------|---------|-------|----------|--------|
| Q9UKV3 | ISNIVHISNLVRPFTLGQLK | 2244.17 | 2248.31 | -4.14 | -1844.53 | 7.E-11 |
| P84103 | VYVGNLGNNGNK         | 1249.60 | 1247.63 | 1.97  | 1576.96  | 7.E-11 |
| P84103 | VYVGNLGNNGNK         | 1249.60 | 1247.63 | 1.97  | 1576.96  | 7.E-11 |
| P84103 | VYVGNLGNNGNK         | 1248.61 | 1247.63 | 0.98  | 788.85   | 7.E-11 |
| P84103 | VYVGNLGNNGNK         | 1247.66 | 1247.63 | 0.03  | 22.41    | 7.E-11 |
| P84103 | VYVGNLGNNGNK         | 1247.63 | 1247.63 | 0.00  | 1.57     | 7.E-11 |
| P02545 | ERARLQLELSK          | 1346.75 | 1341.77 | 4.98  | 3701.39  | 7.E-11 |
| P02545 | RQNGDDPLLTYRFPPK     | 1916.98 | 1915.99 | 0.99  | 514.97   | 7.E-11 |
| P11021 | TFAPEEISAMVLTK       | 1541.79 | 1535.79 | 6.00  | 3893.84  | 7.E-11 |
| P12956 | KQELLEALTK           | 1171.68 | 1171.68 | 0.00  | 0.84     | 7.E-11 |
| P08758 | PSRLYDAYELK          | 1353.78 | 1353.69 | 0.09  | 64.38    | 7.E-11 |
| P08758 | PSRLYDAYELK          | 1353.69 | 1353.69 | 0.00  | 0.71     | 7.E-11 |
| P62081 | AQLRELNITAAK         | 1326.76 | 1326.76 | 0.00  | 0.73     | 7.E-11 |
| P08670 | VESLQEEIAFLK         | 1404.75 | 1404.75 | 0.00  | 0.84     | 7.E-11 |
| P08670 | VESLQEEIAFLK         | 1404.73 | 1404.75 | -0.02 | -13.32   | 7.E-11 |

|        |                                 |         |         |         |            |        |
|--------|---------------------------------|---------|---------|---------|------------|--------|
| P08729 | LEAAIAEAEERGELALK               | 1807.87 | 1811.96 | -4.09   | -2263.29   | 7.E-11 |
| Q9UHX1 | LGLPPLTPEQQEALQK                | 1760.98 | 1760.97 | 0.01    | 3.17       | 7.E-11 |
| Q9UMS4 | VAHPIRPKPPSATSIPAILK            | 2092.26 | 2092.25 | 0.01    | 2.47       | 7.E-11 |
| Q15434 | GYGFVDFDSPSAAQK                 | 1590.83 | 1587.72 | 3.11    | 1954.26    | 7.E-11 |
| Q15434 | GYGFVDFDSPSAAQK                 | 1587.72 | 1587.72 | 0.00    | 2.83       | 7.E-11 |
| Q9BXP5 | EVAFFNFLTDAK                    | 1514.74 | 1514.74 | 0.00    | 0.98       | 7.E-11 |
| P08670 | ILLAELEQLK                      | 1168.71 | 1168.71 | 0.00    | 2.40       | 7.E-11 |
| P45973 | GFSEEHNTWEPEK                   | 1592.86 | 1588.68 | 4.18    | 2622.29    | 8.E-11 |
| P45973 | GFSEEHNTWEPEK                   | 1589.69 | 1588.68 | 1.01    | 633.10     | 8.E-11 |
| O60812 | KSDVEAIFSK                      | 1000.56 | 1122.59 | -122.02 | -121956.00 | 8.E-11 |
| O60812 | QKVDSLLENLEK                    | 1286.71 | 1414.77 | -128.06 | -99523.60  | 8.E-11 |
| P08758 | (41)AQVLRGTVTDFPGFDERADAETLRK   | 2833.44 | 2833.44 | 0.00    | 0.20       | 8.E-11 |
| P20700 | VRSLETENSALQLQVTEREEVREGRELTGLK | 3439.84 | 3439.84 | 0.00    | 0.83       | 8.E-11 |
| P07305 | YSDMIVAAIQAEK                   | 1444.75 | 1437.72 | 7.03    | 4862.50    | 8.E-11 |
| P22626 | RGFGFVTDDHDPVDK                 | 1854.86 | 1850.86 | 4.00    | 2155.90    | 9.E-11 |

|        |                              |         |         |       |          |        |
|--------|------------------------------|---------|---------|-------|----------|--------|
| P02545 | ERARLQLELSK                  | 1346.72 | 1341.77 | 4.95  | 3674.39  | 9.E-11 |
| P02545 | ERARLQLELSK                  | 1341.77 | 1341.77 | 0.00  | 0.06     | 9.E-11 |
| P62805 | VFLENVIRDAVITYTEHAK          | 2106.36 | 2104.10 | 2.26  | 1071.92  | 9.E-11 |
| P62805 | VFLENVIRDAVITYTEHAK          | 2104.11 | 2104.10 | 0.01  | 3.06     | 9.E-11 |
| P62805 | VFLENVIRDAVITYTEHAK          | 2099.31 | 2104.10 | -4.79 | -2282.93 | 9.E-11 |
| Q92522 | ALVQNDTLLQVK                 | 1340.77 | 1340.77 | 0.00  | 0.19     | 9.E-11 |
| P08729 | LEAAIAEAEERGELALK            | 1813.11 | 1811.96 | 1.15  | 636.78   | 9.E-11 |
| P09651 | RSRGGFVITYATVEEVDAAMNARPHK   | 2924.44 | 2908.44 | 16.00 | 5470.32  | 9.E-11 |
| P02545 | NIYSEELRETK                  | 1380.69 | 1380.69 | 0.00  | 2.68     | 9.E-11 |
| P06748 | MSVQPTVSLGGFEITPPVVLRLK      | 2483.38 | 2467.39 | 15.99 | 6439.85  | 1.E-10 |
| P06748 | MSVQPTVSLGGFEITPPVVLRLK      | 2483.32 | 2467.39 | 15.93 | 6415.12  | 1.E-10 |
| P08758 | VLTEIIASRTPEELRAIK           | 2038.18 | 2038.18 | 0.00  | 0.89     | 1.E-10 |
| P08758 | (41)AQLRGTVTDFPGFDERADAETLRK | 2837.37 | 2833.44 | 3.93  | 1384.90  | 1.E-10 |
| Q04695 | EPVTTRQVRTIVEEVQDGK          | 2183.16 | 2183.15 | 0.01  | 3.03     | 1.E-10 |
| P25205 | TIERRYSDLTTLVAFSSSVYPTK      | 2730.42 | 2730.42 | 0.00  | 0.25     | 1.E-10 |

|        |                                     |         |         |        |           |        |
|--------|-------------------------------------|---------|---------|--------|-----------|--------|
| P08758 | (41)AQVLRGTVTDFPGFDERADAETLRK       | 2837.37 | 2833.44 | 3.93   | 1384.40   | 1.E-10 |
| P61978 | ALRTDYNASVSPDSSGPERILSISADIETIGEILK | 3815.96 | 3815.98 | -0.02  | -4.67     | 1.E-10 |
| Q96ST2 | ILQELPSVSQETLK                      | 1580.73 | 1583.88 | -3.15  | -1995.24  | 1.E-10 |
| P61247 | LMELHGEGSSSGK                       | 1330.72 | 1330.62 | 0.10   | 75.15     | 1.E-10 |
| P61247 | LMELHGEGSSSGK                       | 1330.62 | 1330.62 | 0.00   | 0.08      | 1.E-10 |
| Q9UQE7 | MNLPGEVTFPLPNK                      | 1587.84 | 1571.84 | 16.00  | 10075.90  | 1.E-10 |
| P60709 | QEYDESGPSIVHRK                      | 1629.84 | 1643.79 | -13.95 | -8561.61  | 1.E-10 |
| P60709 | QEYDESGPSIVHRK                      | 1626.77 | 1643.79 | -17.02 | -10463.40 | 1.E-10 |
| Q14978 | RGAAGDWGERANQVLK                    | 1726.89 | 1726.89 | 0.00   | 1.29      | 1.E-10 |
| O60812 | VDSLLENLEK                          | 1160.64 | 1158.61 | 2.03   | 1747.49   | 1.E-10 |
| Q92522 | ALVQNDTLLQVK                        | 1340.77 | 1340.77 | 0.00   | -0.41     | 1.E-10 |
| Q12905 | ILITTVPPNLRK                        | 1368.68 | 1363.86 | 4.82   | 3519.98   | 1.E-10 |
| Q12905 | ILITTVPPNLRK                        | 1364.86 | 1363.86 | 1.00   | 735.83    | 1.E-10 |
| P46781 | QVVNIPSFIVRLDSQK                    | 1842.01 | 1842.04 | -0.03  | -17.97    | 1.E-10 |
| P08107 | NQVALNPQNTVFDK                      | 1657.84 | 1657.84 | 0.00   | -0.82     | 1.E-10 |

|        |                               |         |         |        |           |        |
|--------|-------------------------------|---------|---------|--------|-----------|--------|
| P08107 | NQVALNPQNTVFDK                | 1654.85 | 1657.84 | -2.99  | -1804.12  | 1.E-10 |
| P08758 | (41)AQVLRGTVTDFPGFDERADAETLRK | 2833.44 | 2833.44 | 0.00   | 1.22      | 1.E-10 |
| P02545 | NIYSEELRETK                   | 1380.69 | 1380.69 | 0.00   | 3.12      | 1.E-10 |
| Q7L2J0 | GRDPVEILIPK                   | 1237.72 | 1235.72 | 2.00   | 1617.37   | 1.E-10 |
| Q7L2J0 | GRDPVEILIPK                   | 1235.72 | 1235.72 | 0.00   | 0.94      | 1.E-10 |
| Q12905 | ILITTVPPNLRK                  | 1366.71 | 1363.86 | 2.85   | 2083.63   | 1.E-10 |
| Q12905 | ILITTVPPNLRK                  | 1365.63 | 1363.86 | 1.77   | 1295.67   | 1.E-10 |
| Q12905 | ILITTVPPNLRK                  | 1363.86 | 1363.86 | 0.00   | 2.64      | 1.E-10 |
| Q14566 | ATLNARTSILAAANPISGHYDRSK      | 2526.33 | 2526.33 | 0.00   | 0.73      | 1.E-10 |
| O75934 | HIQDLNWQRK                    | 1332.70 | 1336.70 | -4.00  | -3004.21  | 1.E-10 |
| Q96JM3 | T(37)SPASLDFPESQK             | 1405.69 | 1485.64 | -79.95 | -56877.60 | 1.E-10 |
| P08107 | AQIHDLVLVGGSTRIPK             | 1803.04 | 1803.04 | 0.00   | 0.54      | 1.E-10 |
| Q86V81 | LLVSNLDFGVSDADIQELFAEFGTLK    | 2840.45 | 2840.45 | 0.00   | -1.59     | 2.E-10 |
| P46781 | QVVNIPSFIVRLDSQK              | 1842.04 | 1842.04 | 0.00   | 0.00      | 2.E-10 |
| P62241 | LTPEEEEEILNK                  | 1313.67 | 1313.67 | 0.00   | -0.71     | 2.E-10 |

|        |                                            |         |         |       |          |        |
|--------|--------------------------------------------|---------|---------|-------|----------|--------|
| P62241 | LTPEEEEEILNK                               | 1313.65 | 1313.67 | -0.02 | -14.11   | 2.E-10 |
| O60812 | LKGDDLQAIK                                 | 1099.62 | 1099.62 | 0.00  | -0.18    | 2.E-10 |
| A6NJC9 | STYQEFTDHLVK                               | 1469.76 | 1466.70 | 3.06  | 2080.44  | 2.E-10 |
| P60709 | IWHHTFYNELRVAPEEHPVLLTEAPLNPK              | 3449.81 | 3449.79 | 0.02  | 4.47     | 2.E-10 |
| P16401 | ATGPPVSELITK                               | 1212.66 | 1211.68 | 0.98  | 804.25   | 2.E-10 |
| O60812 | VDSLLENLEK                                 | 1158.61 | 1158.61 | 0.00  | 0.26     | 2.E-10 |
| O60812 | VDSLLENLEK                                 | 1158.60 | 1158.61 | -0.01 | -11.65   | 2.E-10 |
| O60812 | VDSLLENLEK                                 | 1158.56 | 1158.61 | -0.05 | -39.87   | 2.E-10 |
| P54652 | DAGTITGLNVLRIINEPTAAAIAYGLDK               | 2873.49 | 2869.55 | 3.94  | 1370.09  | 2.E-10 |
| P52597 | HSGPNSADSANDGFVRLRGLPFGCTK                 | 2773.35 | 2759.32 | 14.03 | 5057.12  | 2.E-10 |
| P08107 | EIAEAYLGYPVTVNAVITVPAYFNDSQRQATK           | 3428.73 | 3428.73 | 0.00  | 1.17     | 2.E-10 |
| P16403 | ERSGVSLAALK                                | 1127.66 | 1129.65 | -1.99 | -1762.76 | 2.E-10 |
| P16403 | ERSGVSLAALK                                | 1127.63 | 1129.65 | -2.02 | -1795.63 | 2.E-10 |
| O60264 | LLTQGFTNWNK                                | 1320.68 | 1320.68 | 0.00  | 0.97     | 2.E-10 |
| Q3BDU5 | LDNARQSAERNSNLVGAACHEELQQSRIRIDSLSAQLSQLQK | 4573.35 | 4573.37 | -0.02 | -3.80    | 2.E-10 |



|        |                               |         |         |         |           |        |
|--------|-------------------------------|---------|---------|---------|-----------|--------|
| P12956 | YSGRDSLIFLVDASK               | 1669.87 | 1669.87 | 0.00    | -0.12     | 2.E-10 |
| P07355 | GLGTDEDSLIEIICSRTNQELQEINRVYK | 3264.60 | 3392.69 | -128.09 | -39236.10 | 2.E-10 |
| Q9BYG3 | (41)ATFSGPAGPILSLNPQEDVEFQK   | 2486.23 | 2486.23 | 0.00    | 0.36      | 2.E-10 |
| P16401 | ATGPPVSELITK                  | 1216.61 | 1211.68 | 4.93    | 4054.86   | 2.E-10 |
| P16401 | ATGPPVSELITK                  | 1215.63 | 1211.68 | 3.95    | 3248.76   | 2.E-10 |
| P16401 | ATGPPVSELITK                  | 1211.68 | 1211.68 | 0.00    | 0.14      | 2.E-10 |
| P05783 | IMADIRAQYDELARK               | 1811.97 | 1791.93 | 20.04   | 11059.00  | 2.E-10 |
| P05783 | IMADIRAQYDELARK               | 1807.93 | 1791.93 | 16.00   | 8850.11   | 2.E-10 |
| P61247 | LMELHGE GSSSGK                | 1334.69 | 1330.62 | 4.07    | 3048.06   | 2.E-10 |
| P61247 | LMELHGE GSSSGK                | 1334.66 | 1330.62 | 4.04    | 3030.66   | 2.E-10 |
| P07355 | SALSGHLETVILGLLK              | 1649.97 | 1649.97 | 0.00    | 0.51      | 2.E-10 |
| P07355 | SALSGHLETVILGLLK              | 1649.95 | 1649.97 | -0.02   | -11.07    | 2.E-10 |
| P06396 | RYIETDPANRRRTPITVVK           | 2399.30 | 2399.30 | 0.00    | 0.91      | 2.E-10 |
| Q96GQ7 | ARILPQDVILK                   | 1265.76 | 1264.79 | 0.97    | 766.04    | 2.E-10 |
| Q6PJT7 | LRSVTTEPSSLK                  | 1320.66 | 1316.73 | 3.93    | 2976.11   | 2.E-10 |

|        |                                |         |         |         |           |        |
|--------|--------------------------------|---------|---------|---------|-----------|--------|
| P16403 | ERSGVSLAALK                    | 1129.65 | 1129.65 | 0.00    | 0.80      | 2.E-10 |
| O00571 | DLLDLLVEAK                     | 1127.64 | 1127.64 | 0.00    | -0.05     | 2.E-10 |
| P46782 | TIAECLADELINAAGSSNSYAIK        | 2446.35 | 2538.26 | -91.91  | -37569.90 | 2.E-10 |
| P14136 | VRFLEQQNK                      | 1160.63 | 1160.63 | 0.00    | -0.08     | 2.E-10 |
| P11021 | ERIDTRNELESYAYSLK              | 2086.03 | 2086.03 | 0.00    | 0.01      | 2.E-10 |
| P05783 | KGPQVRDWSHYFK                  | 1646.84 | 1646.83 | 0.01    | 3.26      | 2.E-10 |
| O43395 | TGIHTSTRLALIAPK                | 1579.81 | 1577.93 | 1.88    | 1187.24   | 2.E-10 |
| Q8WVK2 | GGFNRPLDFIA                    | 1206.61 | 1205.62 | 0.99    | 818.85    | 2.E-10 |
| P16401 | ATGPPVSELITK                   | 1211.55 | 1211.68 | -0.13   | -111.04   | 2.E-10 |
| P08729 | LEAAIAEAEERGELALK              | 1811.96 | 1811.96 | 0.00    | 2.63      | 2.E-10 |
| Q6PJT7 | LRSVTTEPSSLK                   | 1321.63 | 1316.73 | 4.90    | 3704.10   | 3.E-10 |
| Q9Y265 | INGKDSIEKEHVEEISELFYDAK        | 2564.24 | 2692.32 | -128.08 | -49949.70 | 3.E-10 |
| Q3BDU5 | LVRSVTVVEDDEDEDGDDLLHHHHVSGSRR | 3422.62 | 3422.62 | 0.00    | -0.28     | 3.E-10 |
| P62424 | NFGIGQDIQPK                    | 1216.61 | 1215.62 | 0.99    | 809.98    | 3.E-10 |
| P62424 | NFGIGQDIQPK                    | 1215.62 | 1215.62 | 0.00    | 0.77      | 3.E-10 |

|        |                                |         |         |       |          |        |
|--------|--------------------------------|---------|---------|-------|----------|--------|
| P61247 | LMELHGE GSSSGK                 | 1330.72 | 1330.62 | 0.10  | 75.23    | 3.E-10 |
| P61247 | LMELHGE GSSSGK                 | 1330.66 | 1330.62 | 0.04  | 30.74    | 3.E-10 |
| P61247 | LMELHGE GSSSGK                 | 1330.62 | 1330.62 | 0.00  | 0.45     | 3.E-10 |
| Q9NPD3 | (41)AGLELLSDQGYRVDGRRAGELRK    | 2600.38 | 2600.38 | 0.00  | 0.74     | 3.E-10 |
| Q96GQ7 | ARILPQDVILK                    | 1265.76 | 1264.79 | 0.97  | 766.04   | 3.E-10 |
| Q96GQ7 | ARILPQDVILK                    | 1264.79 | 1264.79 | 0.00  | 0.49     | 3.E-10 |
| Q96GQ7 | ARILPQDVILK                    | 1264.73 | 1264.79 | -0.06 | -49.00   | 3.E-10 |
| Q9Y5B9 | DLYIRPNIAQK                    | 1329.74 | 1329.74 | 0.00  | 3.26     | 3.E-10 |
| Q9Y5B9 | DLYIRPNIAQK                    | 1328.65 | 1329.74 | -1.09 | -821.56  | 3.E-10 |
| P07355 | GLGTDEDSLIEIICSR TNQELQEINRVYK | 3392.69 | 3392.69 | 0.00  | 1.13     | 3.E-10 |
| Q15459 | PLPPAPAPDEYLVSPITGEK           | 2090.10 | 2090.09 | 0.01  | 2.91     | 3.E-10 |
| P05783 | IMADIRAQYDELARK                | 1811.97 | 1791.93 | 20.04 | 11058.90 | 3.E-10 |
| P05783 | IMADIRAQYDELARK                | 1809.92 | 1791.93 | 17.99 | 9940.85  | 3.E-10 |
| P05783 | IMADIRAQYDELARK                | 1807.93 | 1791.93 | 16.00 | 8849.67  | 3.E-10 |
| P11940 | VDEAVAVLQAHQAK                 | 1477.79 | 1477.79 | 0.00  | -0.04    | 3.E-10 |

|        |                            |         |         |        |           |        |
|--------|----------------------------|---------|---------|--------|-----------|--------|
| P11940 | VDEAVAVLQAHQAK             | 1475.76 | 1477.79 | -2.03  | -1372.28  | 3.E-10 |
| P62753 | LIEVDDERK                  | 1115.58 | 1115.58 | 0.00   | 0.25      | 3.E-10 |
| Q09666 | GGQIGLQAPGLSVSGPQGHLESGSGK | 2417.23 | 2417.23 | 0.00   | 0.52      | 3.E-10 |
| Q14683 | TRHLALNLQEK                | 1317.60 | 1321.75 | -4.15  | -3150.75  | 3.E-10 |
| P11142 | TVTNAVVTVPAYFNDSQRQATK     | 2410.20 | 2409.23 | 0.97   | 402.58    | 3.E-10 |
| P11142 | TVTNAVVTVPAYFNDSQRQATK     | 2409.23 | 2409.23 | 0.00   | 0.91      | 3.E-10 |
| O00505 | DSQVVQVVL DGLK             | 1398.77 | 1398.77 | 0.00   | 1.85      | 3.E-10 |
| P20042 | IFDIDEAEEGVK               | 1363.86 | 1363.65 | 0.21   | 152.37    | 3.E-10 |
| P20042 | IFDIDEAEEGVK               | 1363.65 | 1363.65 | 0.00   | 2.94      | 3.E-10 |
| Q8WVK2 | GGFNRPLDFIA                | 1205.62 | 1205.62 | 0.00   | 0.85      | 3.E-10 |
| Q8WVK2 | GGFNRPLDFIA                | 1203.76 | 1205.62 | -1.86  | -1547.80  | 3.E-10 |
| P60709 | YPIE(317)HGIVTNWDDMEK      | 1911.90 | 1959.90 | -48.00 | -25106.00 | 3.E-10 |
| P60709 | YPIE(317)HGIVTNWDDMEK      | 1909.92 | 1959.90 | -49.98 | -26168.60 | 3.E-10 |
| Q96GQ7 | ARILPQDVILK                | 1264.79 | 1264.79 | 0.00   | 0.42      | 3.E-10 |
| Q96GQ7 | ARILPQDVILK                | 1264.73 | 1264.79 | -0.06  | -49.56    | 3.E-10 |

|        |                          |         |         |       |          |        |
|--------|--------------------------|---------|---------|-------|----------|--------|
| Q96GQ7 | ARILPQDVILK              | 1264.71 | 1264.79 | -0.08 | -63.39   | 3.E-10 |
| Q07021 | AFVDFLSDEIK              | 1289.63 | 1282.64 | 6.99  | 5419.61  | 3.E-10 |
| Q07021 | AFVDFLSDEIK              | 1289.54 | 1282.64 | 6.90  | 5352.28  | 3.E-10 |
| P06748 | VDNDENEHQLSLRRTVSLGAGAK  | 2409.93 | 2352.17 | 57.76 | 23969.40 | 3.E-10 |
| P06748 | VDNDENEHQLSLRRTVSLGAGAK  | 2409.19 | 2352.17 | 57.02 | 23668.60 | 3.E-10 |
| Q9GZL7 | HVEFDFLIK                | 1146.61 | 1146.61 | 0.00  | 1.82     | 3.E-10 |
| A6NIM7 | TIAECLAEELINAAK          | 1644.84 | 1644.84 | 0.00  | 0.83     | 3.E-10 |
| A6NIM7 | TIAECLAEELINAAK          | 1644.81 | 1644.84 | -0.03 | -19.48   | 3.E-10 |
| O60832 | LDTSQWPLLLK              | 1312.74 | 1312.74 | 0.00  | 1.09     | 3.E-10 |
| P16403 | ERSGVSLAALK              | 1132.65 | 1129.65 | 3.00  | 2648.58  | 3.E-10 |
| P08107 | HWPFQVINDGDKPK           | 1679.84 | 1679.84 | 0.00  | 0.50     | 3.E-10 |
| P63096 | TTGIVETHFTFK             | 1379.71 | 1379.71 | 0.00  | 0.08     | 3.E-10 |
| O60506 | LDEIYVAGLVAHSDLDERAIEALK | 2639.38 | 2639.38 | 0.00  | -1.01    | 3.E-10 |
| P08729 | WTLLEQEK                 | 1044.56 | 1044.56 | 0.00  | 2.22     | 4.E-10 |
| Q9NQG5 | IASLPQEVQDVSLEK          | 1767.97 | 1767.96 | 0.01  | 3.28     | 4.E-10 |

|        |                          |         |         |       |          |        |
|--------|--------------------------|---------|---------|-------|----------|--------|
| Q9GZL7 | HVEFDFLIK                | 1146.61 | 1146.61 | 0.00  | 2.08     | 4.E-10 |
| P62701 | VNDTIQIDLETGK            | 1444.74 | 1444.74 | 0.00  | 0.89     | 4.E-10 |
| Q96GQ7 | ARILPQDVILK              | 1260.70 | 1264.79 | -4.09 | -3247.64 | 4.E-10 |
| Q15427 | VSEPLLWELFLQAGPVVNTHTMPK | 2620.38 | 2604.38 | 16.00 | 6105.21  | 4.E-10 |
| Q14103 | IFVGGLSPDTPEEK           | 1551.77 | 1487.75 | 64.02 | 41259.00 | 4.E-10 |
| Q14103 | IFVGGLSPDTPEEK           | 1551.72 | 1487.75 | 63.97 | 41225.10 | 4.E-10 |
| Q14103 | IFVGGLSPDTPEEK           | 1545.85 | 1487.75 | 58.10 | 37581.50 | 4.E-10 |
| Q14103 | IFVGGLSPDTPEEK           | 1545.78 | 1487.75 | 58.03 | 37541.40 | 4.E-10 |
| Q14683 | TRHLALNLQEK              | 1323.67 | 1321.75 | 1.92  | 1453.60  | 4.E-10 |
| Q14683 | TRHLALNLQEK              | 1321.75 | 1321.75 | 0.00  | 2.94     | 4.E-10 |
| P09525 | SETSGSFEDALLAIVK         | 1665.85 | 1665.85 | 0.00  | 0.12     | 4.E-10 |
| Q9Y3B9 | (41)AAAAPDSRVSEEEENLK    | 1723.86 | 1727.83 | -3.97 | -2302.62 | 4.E-10 |
| P62753 | LIEVDDERK                | 1115.58 | 1115.58 | 0.00  | 0.34     | 4.E-10 |
| O43395 | TGIHTSTRLLALIAPK         | 1578.82 | 1577.93 | 0.89  | 564.10   | 4.E-10 |
| O43395 | TGIHTSTRLLALIAPK         | 1577.93 | 1577.93 | 0.00  | -0.06    | 4.E-10 |

|        |                         |         |         |       |          |        |
|--------|-------------------------|---------|---------|-------|----------|--------|
| Q9BQG0 | VTENLRVLGEAQTK          | 1560.80 | 1556.85 | 3.95  | 2527.94  | 4.E-10 |
| Q9BQG0 | VTENLRVLGEAQTK          | 1556.85 | 1556.85 | 0.00  | 2.44     | 4.E-10 |
| P16403 | ERSGVSLAALK             | 1129.65 | 1129.65 | 0.00  | 0.54     | 4.E-10 |
| P16403 | ERSGVSLAALK             | 1125.57 | 1129.65 | -4.08 | -3623.77 | 4.E-10 |
| Q9Y4Y9 | (41)AANATTNPSQLLPLELVDK | 2045.04 | 2036.08 | 8.96  | 4380.95  | 4.E-10 |
| P26373 | LILFPRKPSAPK            | 1365.85 | 1365.85 | 0.00  | 0.51     | 4.E-10 |
| Q14684 | TPTSSPASSPLVAK          | 1343.68 | 1341.71 | 1.97  | 1468.59  | 4.E-10 |
| Q9H2P0 | YETIHLTEEPTK            | 1459.72 | 1459.72 | 0.00  | 2.98     | 4.E-10 |
| P26373 | LILFPRKPSAPK            | 1369.80 | 1365.85 | 3.95  | 2887.20  | 5.E-10 |
| P26373 | LILFPRKPSAPK            | 1365.85 | 1365.85 | 0.00  | 0.58     | 5.E-10 |
| P02545 | ERARLQLELSK             | 1346.72 | 1341.77 | 4.95  | 3674.31  | 5.E-10 |
| P35659 | KVERLTMQVSSLQREPFTIAQGK | 2645.43 | 2645.43 | 0.00  | 1.82     | 5.E-10 |
| P62736 | EITALAPSTMK             | 1162.61 | 1160.61 | 2.00  | 1718.81  | 5.E-10 |
| P62736 | EITALAPSTMK             | 1160.61 | 1160.61 | 0.00  | 2.07     | 5.E-10 |
| P62736 | EITALAPSTMK             | 1159.60 | 1160.61 | -1.01 | -869.78  | 5.E-10 |

|        |                                      |         |         |         |           |        |
|--------|--------------------------------------|---------|---------|---------|-----------|--------|
| P62736 | EITALAPSTMK                          | 1156.66 | 1160.61 | -3.95   | -3415.95  | 5.E-10 |
| Q92522 | ALVQNDTLLQVK                         | 1340.77 | 1340.77 | 0.00    | 1.23      | 5.E-10 |
| P61313 | AIRRNPDQTWITK                        | 1602.70 | 1597.87 | 4.83    | 3012.76   | 5.E-10 |
| Q02539 | ALAAAGYDVEK                          | 1106.56 | 1106.56 | 0.00    | 1.85      | 5.E-10 |
| Q00839 | RPREDHGRGYFEYIEENK                   | 2294.08 | 2294.08 | 0.00    | 2.00      | 5.E-10 |
| P22626 | SGNFGGSRNMGGPYGGGNYGPGGSGGSGGYGGRSRY | 3373.45 | 3357.44 | 16.01   | 4744.77   | 5.E-10 |
| Q9NQG5 | IASLPQEVQDVSLEK                      | 1770.86 | 1767.96 | 2.90    | 1635.82   | 5.E-10 |
| Q8TC04 | ATMQNLNDRLASVEK                      | 1851.91 | 1851.91 | 0.00    | 2.22      | 5.E-10 |
| Q14103 | IFVGGLSPDTPEEK                       | 1487.75 | 1487.75 | 0.00    | 2.87      | 5.E-10 |
| P08107 | AQIHDLVLVGGSTRIPK                    | 1803.04 | 1803.04 | 0.00    | 0.10      | 5.E-10 |
| O95232 | IDVLLQIEELGSEGKVEEAQGMMK             | 2658.29 | 2773.39 | -115.10 | -43299.90 | 6.E-10 |
| P20700 | LLEGEERLK                            | 1214.65 | 1214.65 | 0.00    | 1.78      | 6.E-10 |
| P20700 | LLEGEERLK                            | 1214.57 | 1214.65 | -0.08   | -65.73    | 6.E-10 |
| P48047 | LVRPPVQVYVYIEGRYATALYSAASK           | 2719.27 | 2708.46 | 10.81   | 3974.76   | 6.E-10 |
| P02545 | EGDLIAAQARLK                         | 1284.76 | 1283.72 | 1.04    | 806.21    | 6.E-10 |



|        |                              |         |         |       |          |        |
|--------|------------------------------|---------|---------|-------|----------|--------|
| P02545 | EGDLIAAQARLK                 | 1283.72 | 1283.72 | 0.00  | 0.46     | 6.E-10 |
| P32969 | DELILEGNDIELVSNAAALIQQATTVK  | 2883.51 | 2883.51 | 0.00  | -0.61    | 6.E-10 |
| O60812 | KSDVEAIFSK                   | 1127.56 | 1122.59 | 4.97  | 4409.98  | 6.E-10 |
| P61981 | (54)VDREQLVQK                | 1155.62 | 1155.62 | 0.00  | 1.38     | 6.E-10 |
| P26447 | ELLTRELPSFLGK                | 1529.84 | 1501.85 | 27.99 | 18299.20 | 6.E-10 |
| P02545 | ERARLQLELSK                  | 1341.77 | 1341.77 | 0.00  | 0.20     | 6.E-10 |
| P08758 | VLTEIIASRTPEELRAIK           | 2038.18 | 2038.18 | 0.00  | 2.11     | 6.E-10 |
| P41219 | MALDIEIATYRK                 | 1422.75 | 1422.75 | 0.00  | 1.50     | 6.E-10 |
| Q01130 | (51)SYGRPPPDVEGMTSLK         | 1781.99 | 1774.86 | 7.13  | 4003.00  | 6.E-10 |
| Q02539 | ALAAAGYDVEK                  | 1106.56 | 1106.56 | 0.00  | 2.21     | 6.E-10 |
| O60506 | VLFVRNLANTVTEEILEK           | 2087.16 | 2087.16 | 0.00  | -0.53    | 6.E-10 |
| Q9H0A0 | VLETPQEIHVSSEAVSLLEEVITPRK   | 3003.62 | 3003.61 | 0.01  | 3.30     | 7.E-10 |
| Q3BDU5 | LVRSVTVVEDDEDGDDLLHHHHVSGSRR | 3421.62 | 3422.62 | -1.00 | -292.48  | 7.E-10 |
| P16403 | ERSGVSLAALK                  | 1133.65 | 1129.65 | 4.00  | 3531.61  | 7.E-10 |
| P09651 | EDTEEHHLRDYFEQYGK            | 2194.96 | 2194.96 | 0.00  | 1.30     | 7.E-10 |

|        |                      |         |         |       |          |        |
|--------|----------------------|---------|---------|-------|----------|--------|
| Q6DKI1 | TIPLTDNTVIEEHLGK     | 1781.82 | 1778.94 | 2.88  | 1614.98  | 7.E-10 |
| P61254 | FNPFVTSDRSK          | 1296.65 | 1296.65 | 0.00  | 2.90     | 7.E-10 |
| Q9UMS4 | TVPEELVKPEELSK       | 1594.77 | 1596.86 | -2.09 | -1310.67 | 7.E-10 |
| P61313 | AIRRNPDQTWITK        | 1597.87 | 1597.87 | 0.00  | 0.65     | 7.E-10 |
| P62701 | VNDTIQIDLETGK        | 1444.74 | 1444.74 | 0.00  | 1.10     | 7.E-10 |
| P52597 | SHRTEMDWVLK          | 1401.70 | 1400.69 | 1.01  | 719.16   | 7.E-10 |
| P68371 | IREEYPDRIMNTFSVVPSPK | 2377.27 | 2377.21 | 0.06  | 24.91    | 7.E-10 |
| P68371 | IREEYPDRIMNTFSVVPSPK | 2377.22 | 2377.21 | 0.01  | 3.12     | 7.E-10 |
| O94776 | DLVAQAPLKPK          | 1178.70 | 1178.70 | 0.00  | 0.78     | 7.E-10 |
| O94776 | DLVAQAPLKPK          | 1177.64 | 1178.70 | -1.06 | -896.09  | 7.E-10 |
| O94776 | DLVAQAPLKPK          | 1175.60 | 1178.70 | -3.10 | -2634.71 | 7.E-10 |
| P02545 | AAYEAEALGDARK        | 1292.64 | 1292.64 | 0.00  | 0.12     | 8.E-10 |
| Q08211 | ILTTEGRNALIHK        | 1464.84 | 1464.84 | 0.00  | 2.91     | 8.E-10 |
| P16403 | ERSGVSLAALK          | 1132.65 | 1129.65 | 3.00  | 2650.26  | 8.E-10 |
| P06396 | RYIETDPANRDRRTPITVVK | 2399.30 | 2399.30 | 0.00  | 0.62     | 8.E-10 |

|        |                                     |         |         |       |         |        |
|--------|-------------------------------------|---------|---------|-------|---------|--------|
| P62906 | RFSGTVRLK                           | 1066.63 | 1062.63 | 4.00  | 3746.21 | 8.E-10 |
| O95926 | (41)AAIAASEVLVDSAEESLAAAAELAAQK     | 2697.37 | 2697.37 | 0.00  | -0.49   | 8.E-10 |
| O75367 | NGPLEVAGAAVSAGHGLPAK                | 1814.96 | 1814.96 | 0.00  | 0.75    | 8.E-10 |
| P16989 | EDVFBVHQTAIK                        | 1285.67 | 1285.67 | 0.00  | 2.00    | 8.E-10 |
| Q9UMS4 | TVPEELVKPEELSK                      | 1596.86 | 1596.86 | 0.00  | 1.56    | 8.E-10 |
| Q14683 | ALSRNSSAQAFGLPENPEEPYLDGINYNVCVAPGK | 3691.77 | 3677.74 | 14.03 | 3799.51 | 8.E-10 |
| P16403 | ERSGVSLAALK                         | 1129.65 | 1129.65 | 0.00  | 0.71    | 8.E-10 |
| P08758 | VLTEIIASRTPEELRAIK                  | 2038.18 | 2038.18 | 0.00  | 1.82    | 8.E-10 |
| P19338 | EVFEDAAEIRLVSK                      | 1604.84 | 1604.84 | 0.00  | -0.21   | 8.E-10 |
| P19338 | FGYVDFESAEDLEK                      | 1647.73 | 1647.73 | 0.00  | 0.12    | 8.E-10 |
| P30876 | SAIGQRIVATLPYIK                     | 1628.96 | 1628.96 | 0.00  | 1.14    | 9.E-10 |
| Q14254 | ELIATVRRPAEAEAHRIQQIAEGEK           | 2815.42 | 2814.51 | 0.91  | 323.41  | 9.E-10 |
| Q14254 | ELIATVRRPAEAEAHRIQQIAEGEK           | 2814.52 | 2814.51 | 0.01  | 2.39    | 9.E-10 |
| O60812 | KSDVEAIFSK                          | 1122.59 | 1122.59 | 0.00  | 0.65    | 9.E-10 |
| O60812 | KSDVEAIFSK                          | 1122.58 | 1122.59 | -0.01 | -11.99  | 9.E-10 |

|        |                                      |         |         |         |           |        |
|--------|--------------------------------------|---------|---------|---------|-----------|--------|
| P08670 | ILLAELEQLK                           | 1168.71 | 1168.71 | 0.00    | 2.14      | 9.E-10 |
| P22626 | SGNFGGSRNMGGPYGGGNYGPGGSGGSGGYGGRSRY | 3373.44 | 3357.44 | 16.00   | 4741.91   | 1.E-09 |
| Q13421 | LRTDAVLPLTVAEVQKLLGPHVEGLK           | 2633.26 | 2795.63 | -162.37 | -61661.40 | 1.E-09 |
| P26599 | HQNVQLPREGQEDQGLTK                   | 2076.04 | 2076.03 | 0.01    | 2.89      | 1.E-09 |
| P16403 | ERSGVSLAALK                          | 1125.57 | 1129.65 | -4.08   | -3623.15  | 1.E-09 |
| O43390 | VTEGLVDVILYHQPDDK                    | 1950.16 | 1939.99 | 10.17   | 5212.73   | 1.E-09 |
| O43390 | VTEGLVDVILYHQPDDK                    | 1945.20 | 1939.99 | 5.21    | 2677.84   | 1.E-09 |
| P68104 | IGGIGTVPVGRVETGVLK                   | 1751.03 | 1751.03 | 0.00    | 2.02      | 1.E-09 |
| P30876 | GFDQEEVFEK                           | 1228.68 | 1226.55 | 2.13    | 1737.47   | 1.E-09 |
| A6NI71 | ALPLIVGAQLIHADK                      | 1557.92 | 1557.92 | 0.00    | 0.50      | 1.E-09 |
| A6NI71 | ALPLIVGAQLIHADK                      | 1554.75 | 1557.92 | -3.17   | -2035.82  | 1.E-09 |
| O43390 | VTEGLVDVILYHQPDDK                    | 1942.10 | 1939.99 | 2.11    | 1085.49   | 1.E-09 |
| Q9H6F5 | AEVVQVIRNPAK                         | 1323.72 | 1322.77 | 0.95    | 717.52    | 1.E-09 |
| Q9H6F5 | AEVVQVIRNPAK                         | 1322.77 | 1322.77 | 0.00    | 2.72      | 1.E-09 |
| Q9NWH9 | (41)AAATGAVAASAASGQAE GK             | 1630.81 | 1629.80 | 1.01    | 618.15    | 1.E-09 |

|        |                                    |         |         |         |           |        |
|--------|------------------------------------|---------|---------|---------|-----------|--------|
| P07355 | DIISDTSGDFRK                       | 1355.67 | 1352.66 | 3.01    | 2221.35   | 1.E-09 |
| P49736 | RGLALALFGGEPK                      | 1327.76 | 1327.76 | 0.00    | 1.90      | 1.E-09 |
| P49736 | RGLALALFGGEPK                      | 1327.74 | 1327.76 | -0.02   | -12.48    | 1.E-09 |
| P09651 | EDTEEHHLRDYFEQYGK                  | 2195.95 | 2194.96 | 0.99    | 449.17    | 1.E-09 |
| O60506 | LDEIYVAGLVAHSDDLDERAIEALK          | 2639.38 | 2639.38 | 0.00    | -1.54     | 1.E-09 |
| P42677 | DLLHPSPEEEK                        | 1292.62 | 1292.62 | 0.00    | 0.92      | 1.E-09 |
| P16403 | ERSGVSLAALK                        | 1129.65 | 1129.65 | 0.00    | -0.17     | 1.E-09 |
| P16403 | ERSGVSLAALK                        | 1129.64 | 1129.65 | -0.01   | -11.68    | 1.E-09 |
| P16403 | ERSGVSLAALK                        | 1129.62 | 1129.65 | -0.03   | -22.75    | 1.E-09 |
| P16403 | ERSGVSLAALK                        | 1127.63 | 1129.65 | -2.02   | -1795.28  | 1.E-09 |
| Q9H307 | (41)AVAVRTLQEQLEK                  | 1525.85 | 1525.85 | 0.00    | 2.68      | 1.E-09 |
| P61978 | IILDLISESPIK                       | 1339.80 | 1339.80 | 0.00    | 2.36      | 1.E-09 |
| P08107 | EIAEAYLGYPVTVNAVITVPAYFNDSQRQATK   | 3428.74 | 3428.73 | 0.01    | 2.86      | 1.E-09 |
| Q15293 | TFDQLTPDESK                        | 1280.60 | 1279.59 | 1.01    | 787.06    | 1.E-09 |
| P56182 | LQDLAGGIFPEDEIPEKACRRLLLEGRRQKKTCK | 3761.99 | 3879.13 | -117.14 | -31137.90 | 1.E-09 |

|        |                             |         |         |       |          |        |
|--------|-----------------------------|---------|---------|-------|----------|--------|
| Q6DKI1 | TIPLTDNTVIEEHLGK            | 1778.94 | 1778.94 | 0.00  | 0.85     | 1.E-09 |
| O60812 | KSDVEAIFSK                  | 1119.66 | 1122.59 | -2.93 | -2618.44 | 1.E-09 |
| P06748 | MSVQPTVSLGGFEITPPVVLRLK     | 2483.39 | 2467.39 | 16.00 | 6442.49  | 1.E-09 |
| P06748 | MSVQPTVSLGGFEITPPVVLRLK     | 2467.39 | 2467.39 | 0.00  | 1.74     | 1.E-09 |
| P41219 | MALDIEIATYRK                | 1445.75 | 1422.75 | 23.00 | 15908.90 | 1.E-09 |
| P41219 | MALDIEIATYRK                | 1443.83 | 1422.75 | 21.08 | 14600.20 | 1.E-09 |
| P41219 | MALDIEIATYRK                | 1443.71 | 1422.75 | 20.96 | 14519.60 | 1.E-09 |
| P41219 | MALDIEIATYRK                | 1439.75 | 1422.75 | 17.00 | 11808.90 | 1.E-09 |
| P08758 | TLFGRDLLDDLK                | 1404.76 | 1404.76 | 0.00  | 0.96     | 1.E-09 |
| P16403 | (51)SETAPAAPAAAPPAEK        | 1519.78 | 1519.75 | 0.03  | 20.45    | 1.E-09 |
| P16403 | (51)SETAPAAPAAAPPAEK        | 1519.75 | 1519.75 | 0.00  | -0.81    | 1.E-09 |
| P16403 | (51)SETAPAAPAAAPPAEK        | 1519.72 | 1519.75 | -0.03 | -17.39   | 1.E-09 |
| P16403 | (51)SETAPAAPAAAPPAEK        | 1519.70 | 1519.75 | -0.05 | -31.73   | 1.E-09 |
| Q99459 | DLPRPSEVNETILRPLNVEPPLTDLQK | 3090.50 | 3082.67 | 7.83  | 2535.09  | 1.E-09 |
| Q8TDN6 | PIEIQWVKPEPK                | 1466.86 | 1462.82 | 4.04  | 2753.26  | 1.E-09 |

|        |                                |         |         |        |          |        |
|--------|--------------------------------|---------|---------|--------|----------|--------|
| Q14684 | TPTSSPASSPLVAK                 | 1341.71 | 1341.71 | 0.00   | 0.39     | 1.E-09 |
| Q9H6F5 | AEVVQVIRNPAK                   | 1324.70 | 1322.77 | 1.93   | 1460.33  | 2.E-09 |
| P11142 | NSLESYAFNMK                    | 1303.73 | 1302.59 | 1.14   | 875.08   | 2.E-09 |
| P11142 | NSLESYAFNMK                    | 1303.59 | 1302.59 | 1.00   | 770.30   | 2.E-09 |
| P02545 | LESTESRSSFSQHARTSGRVAVEEVDEEGK | 3316.59 | 3306.57 | 10.02  | 3019.82  | 2.E-09 |
| P02545 | AAYEAEELGDARK                  | 1293.64 | 1292.64 | 1.00   | 775.76   | 2.E-09 |
| O76021 | SAALPIFSSFVSNWDEATK            | 2069.01 | 2069.01 | 0.00   | -0.07    | 2.E-09 |
| P63220 | QNDAGEFVDLYVPRK                | 1938.92 | 1749.87 | 189.05 | 97501.60 | 2.E-09 |
| P61313 | AIRRNPDQTWITK                  | 1597.87 | 1597.87 | 0.00   | 1.40     | 2.E-09 |
| P61313 | AIRRNPDQTWITK                  | 1597.85 | 1597.87 | -0.02  | -10.99   | 2.E-09 |
| P63220 | QNDAGEFVDLYVPRK                | 1938.92 | 1749.87 | 189.05 | 97501.60 | 2.E-09 |
| O60812 | VDSLLENLEK                     | 1162.69 | 1158.61 | 4.08   | 3509.27  | 2.E-09 |
| P08729 | LEAAIAEAEERGELALK              | 1813.12 | 1811.96 | 1.16   | 637.06   | 2.E-09 |
| P11142 | NQVAMNPTNTVFDK                 | 1657.84 | 1648.79 | 9.05   | 5461.74  | 2.E-09 |
| Q7L014 | ALELSGTAVPPDLEK                | 1538.82 | 1538.82 | 0.00   | 1.47     | 2.E-09 |

|        |                    |         |         |       |          |        |
|--------|--------------------|---------|---------|-------|----------|--------|
| P08758 | VLTEIIASRTPEELRAIK | 2038.18 | 2038.18 | 0.00  | 1.67     | 2.E-09 |
| Q14103 | IFVGGLSPDTPEEK     | 1551.78 | 1487.75 | 64.03 | 41259.30 | 2.E-09 |
| Q14103 | IFVGGLSPDTPEEK     | 1551.72 | 1487.75 | 63.97 | 41225.30 | 2.E-09 |
| Q14103 | IFVGGLSPDTPEEK     | 1545.85 | 1487.75 | 58.10 | 37581.60 | 2.E-09 |
| O95816 | HATRIIDEVVNK       | 1393.77 | 1393.77 | 0.00  | 0.19     | 2.E-09 |
| P32969 | FLDGIYVSEK         | 1169.60 | 1169.60 | 0.00  | -0.10    | 2.E-09 |
| P32969 | FLDGIYVSEK         | 1169.59 | 1169.60 | -0.01 | -11.90   | 2.E-09 |
| P62701 | GIRLTIAEERDK       | 1399.78 | 1399.78 | 0.00  | 0.43     | 2.E-09 |
| P16401 | ATGPPVSELITK       | 1211.65 | 1211.68 | -0.03 | -22.47   | 2.E-09 |
| P16401 | ATGPPVSELITK       | 1211.55 | 1211.68 | -0.13 | -111.28  | 2.E-09 |
| Q96125 | HEQGLSTALSVEK      | 1397.72 | 1397.72 | 0.00  | 2.69     | 2.E-09 |
| P50995 | TPVLFDIYEIK        | 1336.73 | 1336.73 | 0.00  | 2.15     | 2.E-09 |
| Q07021 | AFVDFLSDEIK        | 1289.63 | 1282.64 | 6.99  | 5420.92  | 2.E-09 |
| P08670 | ILLAELEQLK         | 1168.71 | 1168.71 | 0.00  | 2.14     | 2.E-09 |
| O95816 | HATRIIDEVVNK       | 1393.75 | 1393.77 | -0.02 | -12.94   | 2.E-09 |



|        |                                     |         |         |         |            |        |
|--------|-------------------------------------|---------|---------|---------|------------|--------|
| Q9H307 | (41)AVAVRTLQEQLK                    | 1529.85 | 1525.85 | 4.00    | 2616.85    | 2.E-09 |
| Q92522 | ALVQNDTLLQVK                        | 1344.71 | 1340.77 | 3.94    | 2928.94    | 2.E-09 |
| Q92522 | ALVQNDTLLQVK                        | 1340.77 | 1340.77 | 0.00    | 0.41       | 2.E-09 |
| P16989 | (51)SEAGEATTTTTTLPQAPTEAAAAAPQDPAPK | 3136.51 | 3136.50 | 0.01    | 4.03       | 2.E-09 |
| A6NGW7 | LVVDFSATWCGPCKMIK                   | 1775.82 | 2010.97 | -235.15 | -132415.00 | 2.E-09 |
| A6NGW7 | LVVDFSATWCGPCKMIK                   | 1771.84 | 2010.97 | -239.13 | -134962.00 | 2.E-09 |
| P62906 | RFSGTVRLK                           | 1062.63 | 1062.63 | 0.00    | 0.85       | 3.E-09 |
| P62906 | RFSGTVRLK                           | 1062.62 | 1062.63 | -0.01   | -9.50      | 3.E-09 |
| P26599 | LPIDVTEGEVISLGLPFGK                 | 1983.09 | 1983.09 | 0.00    | 1.27       | 3.E-09 |
| P20700 | QLADETLLKVDLENRCQSLTEDLEFRK         | 2993.44 | 3262.65 | -269.21 | -89931.90  | 3.E-09 |
| P08579 | MRGQAFVIFK                          | 1195.65 | 1195.65 | 0.00    | 1.20       | 3.E-09 |
| P16401 | ATGPPVSELITK                        | 1215.63 | 1211.68 | 3.95    | 3248.19    | 3.E-09 |
| P16401 | ATGPPVSELITK                        | 1211.68 | 1211.68 | 0.00    | -0.27      | 3.E-09 |
| P08758 | VLTEIIASRTPEELRAIK                  | 2038.18 | 2038.18 | 0.00    | -0.14      | 3.E-09 |
| Q12905 | ILITTVPPNLRK                        | 1363.86 | 1363.86 | 0.00    | 2.50       | 3.E-09 |

|        |                                |         |         |        |           |        |
|--------|--------------------------------|---------|---------|--------|-----------|--------|
| O75533 | VGAAEIIISRIVDDLK               | 1597.87 | 1597.90 | -0.03  | -16.13    | 3.E-09 |
| P62258 | AAFDDAIAELDTLSEESYK            | 2086.96 | 2086.96 | 0.00   | -0.20     | 3.E-09 |
| P36578 | ACARPLISVYSEK                  | 1443.77 | 1492.77 | -49.00 | -33936.10 | 3.E-09 |
| Q9UQE7 | MNLPGEVTFPLNK                  | 1595.90 | 1571.84 | 24.06  | 15073.30  | 3.E-09 |
| P08758 | (41)AQVLRGTVTDFPGFDERADAETLRK  | 2837.37 | 2833.44 | 3.93   | 1384.83   | 3.E-09 |
| P08758 | (41)AQVLRGTVTDFPGFDERADAETLRK  | 2833.44 | 2833.44 | 0.00   | 1.15      | 3.E-09 |
| Q9Y2W2 | RAQLSQYFDAVK                   | 1424.74 | 1424.74 | 0.00   | 0.28      | 3.E-09 |
| P31946 | TAFDEAIAELDTLNEESYK            | 2165.33 | 2158.00 | 7.33   | 3384.74   | 3.E-09 |
| Q15424 | FDFDACNEVPPAPK                 | 1605.71 | 1605.71 | 0.00   | 1.05      | 3.E-09 |
| P06748 | MSVQPTVSLGGFEITPPVVLRLK        | 2483.39 | 2467.39 | 16.00  | 6441.57   | 3.E-09 |
| P62906 | FLETVELQISLK                   | 1418.80 | 1418.80 | 0.00   | 1.23      | 3.E-09 |
| Q8TED0 | FLLQGLVEK                      | 1158.70 | 1158.70 | 0.00   | 0.94      | 3.E-09 |
| O60506 | ALLERTGYTLDVTTGQRK             | 2021.09 | 2021.09 | 0.00   | 0.68      | 3.E-09 |
| P34931 | VEIANDQGNRTTPSYVAFTDTERLIGDAAK | 3377.48 | 3364.69 | 12.79  | 3787.75   | 3.E-09 |
| P35527 | VQALEEANNDLENK                 | 1585.76 | 1585.76 | 0.00   | 0.47      | 3.E-09 |

|        |                             |         |         |       |          |        |
|--------|-----------------------------|---------|---------|-------|----------|--------|
| O60812 | VDSLLENLEK                  | 1158.61 | 1158.61 | 0.00  | -0.43    | 3.E-09 |
| O60812 | VDSLLENLEK                  | 1158.60 | 1158.61 | -0.01 | -11.39   | 3.E-09 |
| O60812 | VDSLLENLEK                  | 1158.59 | 1158.61 | -0.02 | -20.19   | 3.E-09 |
| Q6KB66 | VTVNPGLLVPLDVK              | 1462.88 | 1462.88 | 0.00  | 2.07     | 3.E-09 |
| O75533 | VGAAEIIISRVDDLK             | 1597.90 | 1597.90 | 0.00  | 1.08     | 3.E-09 |
| P84090 | IYVLLRRQAQQAGK              | 1671.96 | 1642.96 | 29.00 | 17344.50 | 4.E-09 |
| O00567 | FNVNRVDNMIIQSISLLDQLDK      | 2574.35 | 2574.35 | 0.00  | -0.41    | 4.E-09 |
| P26373 | LILFPRKPSAPK                | 1369.80 | 1365.85 | 3.95  | 2887.05  | 4.E-09 |
| Q9UMS4 | TVPEELVKPEELSK              | 1594.77 | 1596.86 | -2.09 | -1310.48 | 4.E-09 |
| Q09028 | IGEEQSPEDAEDGPPELLFIHGGHTAK | 2873.36 | 2872.35 | 1.01  | 350.68   | 4.E-09 |
| O43395 | QLSFISPPTPQPK               | 1438.78 | 1438.78 | 0.00  | -0.14    | 4.E-09 |
| Q15424 | FDFDACNEVPPAPK              | 1610.89 | 1605.71 | 5.18  | 3216.59  | 4.E-09 |
| Q9NX63 | RRVAEELALEQAK               | 1511.84 | 1511.84 | 0.00  | 1.15     | 4.E-09 |
| Q9NX63 | RRVAEELALEQAK               | 1507.77 | 1511.84 | -4.07 | -2700.25 | 4.E-09 |
| Q9H307 | (41)AVAVRTLQEQLK            | 1525.85 | 1525.85 | 0.00  | 0.78     | 4.E-09 |

|        |                          |         |         |        |          |        |
|--------|--------------------------|---------|---------|--------|----------|--------|
| Q9UMS4 | YIAENGTDPINNQLSEEQQLIDIK | 2714.32 | 2713.34 | 0.98   | 362.52   | 4.E-09 |
| Q9UMS4 | YIAENGTDPINNQLSEEQQLIDIK | 2713.35 | 2713.34 | 0.01   | 3.16     | 4.E-09 |
| P12956 | IQVTPPGFQLVFLPFADDK      | 2131.14 | 2131.14 | 0.00   | -0.86    | 4.E-09 |
| Q9H307 | (41)AVAVRTLQEQLK         | 1525.85 | 1525.85 | 0.00   | 1.04     | 4.E-09 |
| Q9H307 | (41)AVAVRTLQEQLK         | 1525.85 | 1525.85 | 0.00   | 0.58     | 4.E-09 |
| P08758 | PSRLYDAYELK              | 1353.69 | 1353.69 | 0.00   | 0.85     | 4.E-09 |
| Q92522 | (51)SVELEEALPVTTAEGMAK   | 1931.94 | 1915.94 | 16.00  | 8279.57  | 4.E-09 |
| Q92522 | (51)SVELEEALPVTTAEGMAK   | 1931.89 | 1915.94 | 15.95  | 8258.48  | 4.E-09 |
| O60506 | LDEIYVAGLVAHSDLDERAIEALK | 2641.43 | 2639.38 | 2.05   | 774.29   | 5.E-09 |
| P05783 | IMADIRAQYDELARK          | 1791.93 | 1791.93 | 0.00   | 2.11     | 5.E-09 |
| P17980 | APSIIFIDELDAIGTKRFDSEK   | 2565.16 | 2464.28 | 100.88 | 39328.50 | 5.E-09 |
| Q9UMS4 | TVPEELVKPEELSK           | 1596.86 | 1596.86 | 0.00   | 1.81     | 5.E-09 |
| Q9UMS4 | TVPEELVKPEELSK           | 1596.84 | 1596.86 | -0.02  | -14.85   | 5.E-09 |
| Q8NC51 | KEETQPPVALK              | 1238.69 | 1238.69 | 0.00   | 2.56     | 5.E-09 |
| O00148 | LTLHGLQQYYVK             | 1461.80 | 1461.80 | 0.00   | 2.06     | 5.E-09 |

|        |                                                           |         |         |       |          |        |
|--------|-----------------------------------------------------------|---------|---------|-------|----------|--------|
| O00148 | LTLHGLQQYYVK                                              | 1461.78 | 1461.80 | -0.02 | -15.93   | 5.E-09 |
| Q9UMS4 | VAHPIRPKPPSATSIPAILK                                      | 2092.26 | 2092.25 | 0.01  | 4.77     | 5.E-09 |
| Q8WVM7 | RANERLELLLQK                                              | 1481.87 | 1481.87 | 0.00  | 1.22     | 5.E-09 |
| O95391 | ALNAEEARLLHVK                                             | 1466.71 | 1462.83 | 3.88  | 2647.17  | 5.E-09 |
| P11940 | NLDDGIDDERLRK                                             | 1557.77 | 1557.77 | 0.00  | 0.79     | 5.E-09 |
| P08174 | QPYITQNYFPVGTVVEYECRPGYRREPSLSPK                          | 3843.91 | 3829.89 | 14.02 | 3646.53  | 5.E-09 |
| P08174 | QPYITQNYFPVGTVVEYECRPGYRREPSLSPK                          | 3833.91 | 3829.89 | 4.02  | 1047.63  | 5.E-09 |
| P67809 | (51)SSEAETQQPPAAPPAALSAADTKPGTTGSGAGSGGP<br>GGLTSAAPAGGDK | 4513.17 | 4513.15 | 0.02  | 3.34     | 5.E-09 |
| P02545 | ERARLQLELSK                                               | 1341.77 | 1341.77 | 0.00  | 0.28     | 5.E-09 |
| P02545 | ERARLQLELSK                                               | 1339.79 | 1341.77 | -1.98 | -1474.57 | 5.E-09 |
| P05787 | WSLLQQQK                                                  | 1029.56 | 1029.56 | 0.00  | 2.50     | 5.E-09 |
| P26373 | LILFPRKPSAPK                                              | 1365.85 | 1365.85 | 0.00  | 0.66     | 5.E-09 |
| P08107 | DAGVIAGLNVLRIINEPTAAAAYGLDRTGK                            | 3153.79 | 3151.74 | 2.05  | 648.85   | 5.E-09 |
| P69905 | VGAHAGEYGAEALERMFLSFPTTK                                  | 2597.26 | 2581.26 | 16.00 | 6159.81  | 5.E-09 |
| Q9BZK7 | LAQQQAAAAAAAAAAAAASQQGSAK                                 | 2054.05 | 2054.05 | 0.00  | 1.74     | 6.E-09 |

|        |                                |         |         |       |          |        |
|--------|--------------------------------|---------|---------|-------|----------|--------|
| P08670 | FADLSEAAANRRNDALRQAK           | 2104.02 | 2103.05 | 0.97  | 463.16   | 6.E-09 |
| P08670 | FADLSEAAANRRNDALRQAK           | 2103.06 | 2103.05 | 0.01  | 3.24     | 6.E-09 |
| Q99848 | PGLNVVLEGP                     | 1121.64 | 1121.64 | 0.00  | 0.96     | 6.E-09 |
| Q99848 | PGLNVVLEGP                     | 1121.56 | 1121.64 | -0.08 | -73.67   | 6.E-09 |
| Q99848 | PGLNVVLEGP                     | 1118.56 | 1121.64 | -3.08 | -2753.10 | 6.E-09 |
| Q96125 | HEQGLSTALSVEK                  | 1397.72 | 1397.72 | 0.00  | 2.84     | 6.E-09 |
| P09651 | RAVSREDSQRPGAHLTVK             | 2006.08 | 2006.08 | 0.00  | 0.88     | 6.E-09 |
| Q15393 | TPVEEVPAAIAPFQGRVLIGVGK        | 2347.34 | 2347.33 | 0.01  | 3.07     | 6.E-09 |
| P11940 | ALYDTFSAFGNILSCK               | 1819.88 | 1805.87 | 14.01 | 7700.56  | 6.E-09 |
| P11940 | ALYDTFSAFGNILSCK               | 1817.95 | 1805.87 | 12.08 | 6645.36  | 6.E-09 |
| O95391 | ALNAEEARLLHVK                  | 1462.83 | 1462.83 | 0.00  | 1.11     | 6.E-09 |
| P50914 | MTDFDRFK                       | 1058.49 | 1058.49 | 0.00  | 0.75     | 6.E-09 |
| Q03252 | ALYESELADARRVLDETARERARLQIEIGK | 3471.86 | 3470.86 | 1.00  | 287.48   | 6.E-09 |
| P08758 | VLTEIIASRTPEELRAIK             | 2038.18 | 2038.18 | 0.00  | -0.54    | 6.E-09 |
| Q8TDN6 | TLLPHDPTADVFTPAEEK             | 2079.06 | 2079.05 | 0.01  | 2.46     | 6.E-09 |

|        |                              |         |         |       |          |        |
|--------|------------------------------|---------|---------|-------|----------|--------|
| P08729 | NKYEDEINRRTAAENEFVVLK        | 2537.30 | 2537.29 | 0.01  | 2.34     | 7.E-09 |
| O60508 | PSLAVAVDSAPEVAVK             | 1555.75 | 1551.85 | 3.90  | 2507.68  | 7.E-09 |
| O60508 | PSLAVAVDSAPEVAVK             | 1554.84 | 1551.85 | 2.99  | 1924.01  | 7.E-09 |
| Q14978 | RGAAGDWGERANQVLK             | 1726.89 | 1726.89 | 0.00  | 1.93     | 7.E-09 |
| P02545 | ERARLQLELSK                  | 1341.77 | 1341.77 | 0.00  | -0.09    | 7.E-09 |
| P02545 | ERARLQLELSK                  | 1339.79 | 1341.77 | -1.98 | -1475.24 | 7.E-09 |
| Q9UKX7 | GLVVPSGGGRFSGFGSGAGGK        | 1849.95 | 1849.94 | 0.01  | 2.74     | 7.E-09 |
| Q9UKX7 | GLVVPSGGGRFSGFGSGAGGK        | 1848.90 | 1849.94 | -1.04 | -564.73  | 7.E-09 |
| P02545 | ERARLQLELSK                  | 1341.77 | 1341.77 | 0.00  | -0.09    | 7.E-09 |
| P68104 | DGNASGTTLLEALDCILPPTPTDK     | 2661.36 | 2654.32 | 7.04  | 2644.59  | 7.E-09 |
| P39023 | PVHLTAFLGYK                  | 1244.69 | 1244.69 | 0.00  | 2.96     | 7.E-09 |
| Q9H307 | (41)AVAVRTLQEQLK             | 1525.85 | 1525.85 | 0.00  | 0.58     | 7.E-09 |
| P08107 | HWPFQVINDGDKPK               | 1679.84 | 1679.84 | 0.00  | 0.92     | 7.E-09 |
| P15880 | VTGRCGSVLVRLIPAPRGTGIVSAPVPK | 2856.65 | 2856.65 | 0.00  | 0.59     | 7.E-09 |
| P17676 | APPTACYAGAAPAPSQVK           | 1769.88 | 1755.86 | 14.02 | 7922.69  | 7.E-09 |

|        |                                         |         |         |        |          |        |
|--------|-----------------------------------------|---------|---------|--------|----------|--------|
| O75340 | AGVNFSEFTGVWK                           | 1441.78 | 1440.70 | 1.08   | 747.94   | 7.E-09 |
| O75340 | AGVNFSEFTGVWK                           | 1441.76 | 1440.70 | 1.06   | 732.34   | 7.E-09 |
| O75340 | AGVNFSEFTGVWK                           | 1440.70 | 1440.70 | 0.00   | 0.46     | 7.E-09 |
| P08107 | HWPFQVINDGDKPK                          | 1679.84 | 1679.84 | 0.00   | -0.27    | 7.E-09 |
| P06748 | CGSGPVHISGQHLVAVEEDAE(37)SEDEEEEDVK     | 3442.41 | 3459.43 | -17.02 | -4945.42 | 8.E-09 |
| P16403 | (51)SETAAPAAAPPAEK                      | 1519.76 | 1519.75 | 0.01   | 3.34     | 8.E-09 |
| P16403 | (51)SETAAPAAAPPAEK                      | 1519.75 | 1519.75 | 0.00   | 2.94     | 8.E-09 |
| Q6P6C2 | (41)AAASGYTDLREK                        | 1322.65 | 1322.65 | 0.00   | 1.92     | 8.E-09 |
| P68104 | GSF(75)KYAWVLDK                         | 1340.71 | 1340.71 | 0.00   | 2.73     | 8.E-09 |
| P02545 | ERARLQLELSK                             | 1339.79 | 1341.77 | -1.98  | -1474.57 | 8.E-09 |
| P06748 | VDNDENEHQLSLRTVSLGAGAK                  | 2352.18 | 2352.17 | 0.01   | 2.67     | 8.E-09 |
| P11142 | SENVQDLLLLDVTPLSLGIETAGGVMTVLIKRNTTIPTK | 4334.30 | 4149.30 | 185.00 | 42682.70 | 8.E-09 |
| Q9H307 | (41)AVAVRTLQEULEK                       | 1525.85 | 1525.85 | 0.00   | 0.97     | 9.E-09 |
| Q6P6C2 | (41)AAASGYTDLREK                        | 1322.65 | 1322.65 | 0.00   | 2.23     | 9.E-09 |
| Q09028 | TPSSDVLVFDYTK                           | 1482.77 | 1470.72 | 12.05  | 8125.18  | 9.E-09 |



|        |                     |         |         |       |          |        |
|--------|---------------------|---------|---------|-------|----------|--------|
| P05783 | GLQAQIASSGLTVEVDAPK | 1883.01 | 1883.00 | 0.01  | 4.53     | 9.E-09 |
| P07910 | LKGDDLQAIKK         | 1227.72 | 1227.72 | 0.00  | -0.61    | 9.E-09 |
| P41219 | MALDIEIATYRK        | 1441.77 | 1422.75 | 19.02 | 13191.50 | 9.E-09 |
| P41219 | MALDIEIATYRK        | 1438.76 | 1422.75 | 16.01 | 11126.00 | 9.E-09 |
| P41219 | MALDIEIATYRK        | 1438.74 | 1422.75 | 15.99 | 11112.60 | 9.E-09 |
| P41219 | MALDIEIATYRK        | 1434.75 | 1422.75 | 12.00 | 8364.86  | 9.E-09 |
| P41219 | MALDIEIATYRK        | 1433.76 | 1422.75 | 11.01 | 7679.11  | 9.E-09 |
| P41219 | MALDIEIATYRK        | 1433.75 | 1422.75 | 11.00 | 7669.91  | 9.E-09 |
| P46781 | QVVNIPSFIVRLDSQK    | 1842.04 | 1842.04 | 0.00  | 0.65     | 9.E-09 |
| P46781 | QVVNIPSFIVRLDSQK    | 1842.02 | 1842.04 | -0.02 | -11.95   | 9.E-09 |
| P47914 | AQAAAPASVPAQAPK     | 1376.74 | 1376.74 | 0.00  | -0.13    | 9.E-09 |
| P35659 | LLYNRP GTVSSLK      | 1446.82 | 1446.82 | 0.00  | 2.53     | 1.E-08 |
| P05783 | GPQVRDWSHYFK        | 1518.74 | 1518.74 | 0.00  | 2.45     | 1.E-08 |
| P05783 | GPQVRDWSHYFK        | 1514.76 | 1518.74 | -3.98 | -2627.93 | 1.E-08 |
| P20700 | ESRACLERIQELEDLLAK  | 2172.12 | 2172.12 | 0.00  | 0.12     | 1.E-08 |

|        |                                  |         |         |         |           |        |
|--------|----------------------------------|---------|---------|---------|-----------|--------|
| Q8WWY3 | RFPELESVLPNALDYIRTVK             | 2371.35 | 2359.29 | 12.06   | 5085.07   | 1.E-08 |
| P02545 | ERARLQLELSK                      | 1342.77 | 1341.77 | 1.00    | 747.24    | 1.E-08 |
| O60812 | VDSLLENLEK                       | 1160.64 | 1158.61 | 2.03    | 1747.40   | 1.E-08 |
| O60812 | VDSLLENLEK                       | 1158.66 | 1158.61 | 0.05    | 41.00     | 1.E-08 |
| O60812 | VDSLLENLEK                       | 1158.61 | 1158.61 | 0.00    | 1.04      | 1.E-08 |
| O60812 | VDSLLENLEK                       | 1156.56 | 1158.61 | -2.05   | -1775.43  | 1.E-08 |
| Q9NQ55 | TEEELQAILEAK                     | 1382.69 | 1372.71 | 9.98    | 7216.78   | 1.E-08 |
| Q9NQ55 | TEEELQAILEAK                     | 1380.66 | 1372.71 | 7.95    | 5759.17   | 1.E-08 |
| P68104 | GSF(75)KYAWVLDK                  | 1340.77 | 1340.71 | 0.06    | 45.02     | 1.E-08 |
| P09651 | GGNFGGRSSGPYGGGGQYFAK            | 1891.83 | 2019.92 | -128.09 | -67706.30 | 1.E-08 |
| P78346 | (41)AVFADLDRAGSDLK               | 1631.85 | 1631.85 | 0.00    | -1.95     | 1.E-08 |
| Q05519 | LNHVAAGLVSPSLK                   | 1407.84 | 1404.81 | 3.03    | 2149.50   | 1.E-08 |
| Q12906 | EPPLSLTIHLTSPVVREEMEK            | 2404.27 | 2404.27 | 0.00    | -0.31     | 1.E-08 |
| P08174 | QPYITQNYFPVGTWVEYECRPGYRREPSLSPK | 3843.91 | 3829.89 | 14.02   | 3646.74   | 1.E-08 |
| Q9NVP1 | VPPFVDLNVNSNEGK                  | 1631.84 | 1627.82 | 4.02    | 2465.95   | 1.E-08 |

|        |                                         |         |         |        |           |        |
|--------|-----------------------------------------|---------|---------|--------|-----------|--------|
| Q9NVP1 | VPPFVDLNVNSNEGK                         | 1631.78 | 1627.82 | 3.96   | 2424.20   | 1.E-08 |
| P20700 | ALYETELADARRALDDTARERAK                 | 2633.35 | 2633.35 | 0.00   | 0.54      | 1.E-08 |
| Q9UMS4 | VAHPIRPKPPSATSIPAILK                    | 2092.26 | 2092.25 | 0.01   | 4.62      | 1.E-08 |
| Q9Y224 | AIRILVQERLTQDAVAK                       | 1923.13 | 1923.13 | 0.00   | 0.83      | 1.E-08 |
| P60709 | QEYDESGPSIVHRK                          | 1626.77 | 1643.79 | -17.02 | -10464.90 | 1.E-08 |
| P08758 | PSRLYDAYELK                             | 1353.78 | 1353.69 | 0.09   | 65.19     | 1.E-08 |
| P61247 | APAMFNIRNIGK                            | 1334.72 | 1330.72 | 4.00   | 2998.86   | 1.E-08 |
| P61247 | APAMFNIRNIGK                            | 1334.69 | 1330.72 | 3.97   | 2973.76   | 1.E-08 |
| P61247 | APAMFNIRNIGK                            | 1334.67 | 1330.72 | 3.95   | 2958.67   | 1.E-08 |
| Q13838 | HFILDEC DK                              | 1184.75 | 1175.53 | 9.22   | 7785.77   | 1.E-08 |
| Q13838 | HFILDEC DK                              | 1175.53 | 1175.53 | 0.00   | 1.71      | 1.E-08 |
| Q13838 | HFILDEC DK                              | 1175.52 | 1175.53 | -0.01  | -10.54    | 1.E-08 |
| Q3BDU5 | LLEGEEERLRLSPSPTSQRSRGRASSHSSQTQGGGSVTK | 4152.10 | 4152.10 | 0.00   | 0.51      | 1.E-08 |
| P20700 | ALYETELADARRALDDTARERAK                 | 2633.35 | 2633.35 | 0.00   | 1.79      | 1.E-08 |
| O75526 | SRGFAFVTFESPADAK                        | 1728.86 | 1728.85 | 0.01   | 3.59      | 1.E-08 |

|        |                                   |         |         |       |         |        |
|--------|-----------------------------------|---------|---------|-------|---------|--------|
| P20700 | ALYETELADARRALDDTARERAK           | 2633.35 | 2633.35 | 0.00  | 0.50    | 1.E-08 |
| P62906 | VLCLAVAVGHVK                      | 1264.73 | 1264.73 | 0.00  | 1.48    | 1.E-08 |
| P62906 | VLCLAVAVGHVK                      | 1263.77 | 1264.73 | -0.96 | -759.65 | 1.E-08 |
| P16401 | ATGPPVSELITK                      | 1216.61 | 1211.68 | 4.93  | 4055.67 | 1.E-08 |
| P16401 | ATGPPVSELITK                      | 1215.63 | 1211.68 | 3.95  | 3248.92 | 1.E-08 |
| P16401 | ATGPPVSELITK                      | 1212.66 | 1211.68 | 0.98  | 805.49  | 1.E-08 |
| O43660 | QYPANQQQEVEYFVAGTHPYPPGPGVALTADTK | 3501.69 | 3501.68 | 0.01  | 3.76    | 1.E-08 |
| Q9NVP1 | VPPFVDLNVNSNEGK                   | 1632.73 | 1627.82 | 4.91  | 3009.76 | 1.E-08 |
| Q9NVP1 | VPPFVDLNVNSNEGK                   | 1631.84 | 1627.82 | 4.02  | 2464.97 | 1.E-08 |
| Q9NVP1 | VPPFVDLNVNSNEGK                   | 1631.78 | 1627.82 | 3.96  | 2424.07 | 1.E-08 |
| P62917 | LARASGNYATVISHNPETK               | 2028.04 | 2028.04 | 0.00  | 0.38    | 1.E-08 |
| P46777 | GAVDGGLSIPHSTK                    | 1341.64 | 1337.69 | 3.95  | 2943.34 | 1.E-08 |
| P46777 | GAVDGGLSIPHSTK                    | 1339.64 | 1337.69 | 1.95  | 1457.63 | 1.E-08 |
| P46782 | (52)TEWETAAPAVAETPDIK             | 1869.90 | 1869.90 | 0.00  | -0.44   | 1.E-08 |
| P46782 | (52)TEWETAAPAVAETPDIK             | 1869.86 | 1869.90 | -0.04 | -20.28  | 1.E-08 |

|        |                       |         |         |       |         |        |
|--------|-----------------------|---------|---------|-------|---------|--------|
| P08758 | PSRLYDAYELK           | 1353.69 | 1353.69 | 0.00  | 0.63    | 1.E-08 |
| Q9NVP1 | ISDIQSQLEK            | 1159.61 | 1159.61 | 0.00  | 0.99    | 1.E-08 |
| Q01082 | LSDLQKEAEK            | 1159.58 | 1159.61 | -0.03 | -26.95  | 1.E-08 |
| P08670 | VESLQEEIAFLK          | 1407.76 | 1404.75 | 3.01  | 2140.19 | 1.E-08 |
| P08670 | VESLQEEIAFLK          | 1406.76 | 1404.75 | 2.01  | 1428.95 | 1.E-08 |
| Q04695 | VRALEEANTELEVK        | 1599.85 | 1599.85 | 0.00  | 1.77    | 1.E-08 |
| O60812 | KSDVEAIFSK            | 1127.56 | 1122.59 | 4.97  | 4410.33 | 1.E-08 |
| P16403 | (51)SETAPAAPAAAPPAEK  | 1519.76 | 1519.75 | 0.01  | 3.34    | 2.E-08 |
| P16403 | (51)SETAPAAPAAAPPAEK  | 1519.76 | 1519.75 | 0.01  | 3.87    | 2.E-08 |
| Q14978 | RGAAGDWGERANQVLK      | 1729.90 | 1726.89 | 3.01  | 1740.29 | 2.E-08 |
| Q14978 | RGAAGDWGERANQVLK      | 1726.89 | 1726.89 | 0.00  | 1.69    | 2.E-08 |
| P22626 | RGFGFVTFDDHDPVDK      | 1852.87 | 1850.86 | 2.01  | 1083.83 | 2.E-08 |
| O43390 | IPRDLYEDELVPLFEK      | 1975.04 | 1975.03 | 0.01  | 3.80    | 2.E-08 |
| P46782 | (52)TEWETAAPAVAETPDIK | 1885.90 | 1869.90 | 16.00 | 8482.74 | 2.E-08 |
| Q6P6C2 | (41)AAASGYTDLREK      | 1325.72 | 1322.65 | 3.07  | 2314.78 | 2.E-08 |

|        |                                       |         |         |       |          |        |
|--------|---------------------------------------|---------|---------|-------|----------|--------|
| P16403 | ERSGVSLAALK                           | 1132.65 | 1129.65 | 3.00  | 2649.02  | 2.E-08 |
| P16403 | ERSGVSLAALK                           | 1131.66 | 1129.65 | 2.01  | 1774.13  | 2.E-08 |
| P16403 | ERSGVSLAALK                           | 1129.65 | 1129.65 | 0.00  | 0.18     | 2.E-08 |
| P16403 | ERSGVSLAALK                           | 1125.57 | 1129.65 | -4.08 | -3623.77 | 2.E-08 |
| O60506 | LDEIYVAGLVAHSDLDERAIEALK              | 2639.38 | 2639.38 | 0.00  | -0.86    | 2.E-08 |
| Q9NVP1 | VPPFVDLNVNSNEGK                       | 1632.73 | 1627.82 | 4.91  | 3010.01  | 2.E-08 |
| Q9NVP1 | VPPFVDLNVNSNEGK                       | 1627.82 | 1627.82 | 0.00  | 0.27     | 2.E-08 |
| P02545 | ERARLQLELSK                           | 1341.77 | 1341.77 | 0.00  | -0.17    | 2.E-08 |
| Q12906 | EATDAIGHLDLDRQQREDITQSAQHALRLAAFGQLHK | 3924.01 | 3924.01 | 0.00  | -1.18    | 2.E-08 |
| P20700 | DAALATALGDKK                          | 1176.67 | 1172.64 | 4.03  | 3427.49  | 2.E-08 |
| P20700 | DAALATALGDKK                          | 1174.57 | 1172.64 | 1.93  | 1644.97  | 2.E-08 |
| P20700 | DAALATALGDKK                          | 1173.64 | 1172.64 | 1.00  | 855.74   | 2.E-08 |
| P20700 | DAALATALGDKK                          | 1171.68 | 1172.64 | -0.96 | -817.51  | 2.E-08 |
| P08174 | QPYITQNYFPVGTWVEYECRPGYRREPSLSPK      | 3843.91 | 3829.89 | 14.02 | 3647.51  | 2.E-08 |
| P08174 | QPYITQNYFPVGTWVEYECRPGYRREPSLSPK      | 3831.90 | 3829.89 | 2.01  | 524.23   | 2.E-08 |

|        |                         |         |         |       |         |        |
|--------|-------------------------|---------|---------|-------|---------|--------|
| Q8N108 | DNEQALYELVK             | 1322.66 | 1320.66 | 2.00  | 1511.18 | 2.E-08 |
| Q8N108 | DNEQALYELVK             | 1320.66 | 1320.66 | 0.00  | 1.34    | 2.E-08 |
| P06748 | MSVQPTVSLGGFEITPPVVLRLK | 2483.38 | 2467.39 | 15.99 | 6439.57 | 2.E-08 |
| P06748 | MSVQPTVSLGGFEITPPVVLRLK | 2483.32 | 2467.39 | 15.93 | 6415.24 | 2.E-08 |
| P62701 | GIRLTIAEERDK            | 1399.78 | 1399.78 | 0.00  | 0.58    | 2.E-08 |
| Q13243 | GYGRIRDIDLK             | 1304.72 | 1304.72 | 0.00  | 0.03    | 2.E-08 |
| Q13243 | GYGRIRDIDLK             | 1303.64 | 1304.72 | -1.08 | -827.03 | 2.E-08 |
| Q5XKE5 | YEELQVTAGK              | 1136.57 | 1136.57 | 0.00  | 2.43    | 2.E-08 |
| Q9BQ39 | SRYEQVDLVGK             | 1297.66 | 1292.67 | 4.99  | 3846.03 | 2.E-08 |
| P16401 | ATGPPVSELITK            | 1211.68 | 1211.68 | 0.00  | 0.64    | 2.E-08 |
| P16401 | ATGPPVSELITK            | 1216.61 | 1211.68 | 4.93  | 4054.45 | 2.E-08 |
| P16401 | ATGPPVSELITK            | 1215.63 | 1211.68 | 3.95  | 3248.27 | 2.E-08 |
| P16401 | ATGPPVSELITK            | 1211.68 | 1211.68 | 0.00  | 0.14    | 2.E-08 |
| A6NJC9 | STYQEFTDHLVK            | 1469.76 | 1466.70 | 3.06  | 2079.83 | 2.E-08 |
| Q05519 | LNHVAAGLVSPSLK          | 1404.81 | 1404.81 | 0.00  | -0.54   | 2.E-08 |

|        |                      |         |         |         |           |        |
|--------|----------------------|---------|---------|---------|-----------|--------|
| P08670 | VESLQEEIAFLK         | 1406.76 | 1404.75 | 2.01    | 1429.23   | 2.E-08 |
| O75367 | GVTIASGGVLPNIHPELLAK | 1864.89 | 1985.13 | -120.24 | -64475.90 | 2.E-08 |
| O75367 | GVTIASGGVLPNIHPELLAK | 1864.85 | 1985.13 | -120.28 | -64496.60 | 2.E-08 |
| O60812 | KSDVEAIFSK           | 1123.58 | 1122.59 | 0.99    | 881.41    | 2.E-08 |
| O60812 | KSDVEAIFSK           | 1122.59 | 1122.59 | 0.00    | -0.41     | 2.E-08 |
| P09651 | EDTEEHHLRDYFEQYGK    | 2194.96 | 2194.96 | 0.00    | 1.03      | 2.E-08 |
| P62258 | AAFDDAIAELDTLSEESYK  | 2086.96 | 2086.96 | 0.00    | 2.20      | 2.E-08 |
| P22626 | RGFGFVTFDDHDPVDK     | 1854.86 | 1850.86 | 4.00    | 2155.63   | 2.E-08 |
| Q9NVP1 | VPPFVDLNVNSNEGK      | 1627.82 | 1627.82 | 0.00    | -0.03     | 2.E-08 |
| P42677 | DLLHPSPEEEK          | 1292.62 | 1292.62 | 0.00    | -0.09     | 2.E-08 |
| Q13243 | GYGRIRDIDLK          | 1307.78 | 1304.72 | 3.06    | 2340.87   | 2.E-08 |
| P14136 | VRFLEQQNK            | 1160.63 | 1160.63 | 0.00    | -0.34     | 2.E-08 |
| P62736 | EITALAPSTMK          | 1160.61 | 1160.61 | 0.00    | 1.56      | 2.E-08 |
| P62736 | EITALAPSTMK          | 1160.60 | 1160.61 | -0.01   | -10.85    | 2.E-08 |
| P46781 | IEDFLERRLQTQVFK      | 1921.04 | 1921.04 | 0.00    | 0.83      | 2.E-08 |



|        |                             |         |         |       |          |        |
|--------|-----------------------------|---------|---------|-------|----------|--------|
| P02545 | RQNGDDPLLTYRFPPK            | 1916.98 | 1915.99 | 0.99  | 514.86   | 2.E-08 |
| P15880 | VTGRCGSVLRLIPAPRGTGIVSAPVPK | 2856.65 | 2856.65 | 0.00  | -0.22    | 2.E-08 |
| P16401 | ATGPPVSELITK                | 1211.55 | 1211.68 | -0.13 | -110.54  | 2.E-08 |
| Q9NX34 | (51)SVQPTVSLGGFEITPPVVLRLK  | 2419.39 | 2378.36 | 41.03 | 16957.60 | 2.E-08 |
| P16401 | ATGPPVSELITK                | 1211.65 | 1211.68 | -0.03 | -22.72   | 2.E-08 |
| P16401 | ATGPPVSELITK                | 1211.55 | 1211.68 | -0.13 | -111.37  | 2.E-08 |
| O60506 | IPRDLFEDELVPLFEK            | 1959.04 | 1959.04 | 0.00  | 0.83     | 2.E-08 |
| Q9Y265 | GLGLDESLAK                  | 1061.63 | 1058.56 | 3.07  | 2887.22  | 2.E-08 |
| P28370 | RDFNQFIK                    | 1066.56 | 1066.56 | 0.00  | 1.06     | 2.E-08 |
| P27635 | IRIFDLGRK                   | 1116.68 | 1116.68 | 0.00  | 0.60     | 2.E-08 |
| P27635 | IRIFDLGRK                   | 1116.67 | 1116.68 | -0.01 | -11.32   | 2.E-08 |
| P08729 | LEAAIAEAEERGELALK           | 1811.96 | 1811.96 | 0.00  | 2.30     | 2.E-08 |
| A3R0T7 | AVTASKERSGVSLAALK           | 1691.87 | 1686.96 | 4.91  | 2904.65  | 2.E-08 |
| O14979 | DLTEYLSRFGEVVDCTIK          | 2158.06 | 2144.05 | 14.01 | 6493.27  | 2.E-08 |
| O14979 | DLTEYLSRFGEVVDCTIK          | 2154.07 | 2144.05 | 10.02 | 4649.43  | 2.E-08 |

|        |                                |         |         |       |          |        |
|--------|--------------------------------|---------|---------|-------|----------|--------|
| Q53HU8 | VELQELNDRFANYIDK               | 1965.98 | 1965.98 | 0.00  | 2.15     | 2.E-08 |
| Q7L2J0 | GRDPVEILIPK                    | 1237.72 | 1235.72 | 2.00  | 1617.29  | 2.E-08 |
| Q7L2J0 | GRDPVEILIPK                    | 1235.72 | 1235.72 | 0.00  | 1.27     | 2.E-08 |
| P08107 | EIAEAYLGYPVNAVITVPAYFNDSQRQATK | 3428.74 | 3428.73 | 0.01  | 1.70     | 2.E-08 |
| P61247 | APAMFNIRNIGK                   | 1330.72 | 1330.72 | 0.00  | 1.01     | 2.E-08 |
| P61247 | APAMFNIRNIGK                   | 1330.62 | 1330.72 | -0.10 | -74.14   | 2.E-08 |
| P06748 | VDNDENEHQLSLRTVSLGAGAK         | 2409.19 | 2352.17 | 57.02 | 23668.60 | 2.E-08 |
| Q13243 | LNEGVVEFASYGDLK                | 1639.81 | 1639.81 | 0.00  | -0.01    | 3.E-08 |
| O14639 | FPAAQAPDPSETPK                 | 1454.70 | 1454.70 | 0.00  | 2.11     | 3.E-08 |
| Q9NYF8 | DRLLASTLVHSVK                  | 1437.83 | 1437.83 | 0.00  | 1.23     | 3.E-08 |
| O43395 | PFLDDSTLRFVDK                  | 1551.79 | 1551.79 | 0.00  | 0.40     | 3.E-08 |
| P07355 | DIISDTSGDFRK                   | 1354.74 | 1352.66 | 2.08  | 1533.74  | 3.E-08 |
| P07355 | DIISDTSGDFRK                   | 1352.66 | 1352.66 | 0.00  | -0.06    | 3.E-08 |
| O60812 | LKGDDLQAIK                     | 1099.62 | 1099.62 | 0.00  | 0.00     | 3.E-08 |
| P62753 | RMATEVAADALGEEWK               | 1781.99 | 1775.85 | 6.14  | 3445.53  | 3.E-08 |

|        |                            |         |         |        |           |        |
|--------|----------------------------|---------|---------|--------|-----------|--------|
| Q9BQ39 | SRYEQVDLVGK                | 1296.68 | 1292.67 | 4.01   | 3090.63   | 3.E-08 |
| O43390 | IPRDLYEDELVPLFEK           | 1976.04 | 1975.03 | 1.01   | 508.90    | 3.E-08 |
| Q9Y2W1 | WEGLVYAPPGK                | 1215.63 | 1215.63 | 0.00   | 1.25      | 3.E-08 |
| Q14254 | IRQEEIEIEVVQRK             | 1767.98 | 1767.98 | 0.00   | 2.40      | 3.E-08 |
| P52597 | HSGPNSADSANDGFVRLRGLPFGCTK | 2759.33 | 2759.32 | 0.01   | 2.63      | 3.E-08 |
| P60709 | YPIE(317)HGIVTNWDDMEK      | 1911.90 | 1959.90 | -48.00 | -25106.00 | 3.E-08 |
| P61978 | GSDFDCELRLLIHQSLAGGIIGVK   | 2611.38 | 2597.36 | 14.02  | 5368.84   | 3.E-08 |
| Q9NX34 | SVQPTVSLGGFEITPPVVLRLK     | 2339.29 | 2336.35 | 2.94   | 1258.41   | 3.E-08 |
| P40429 | VFDGIPPPYDK                | 1246.64 | 1246.62 | 0.02   | 13.27     | 3.E-08 |
| P40429 | VFDGIPPPYDK                | 1246.62 | 1246.62 | 0.00   | 1.64      | 3.E-08 |
| P07355 | (51)STVHEILCK              | 1131.56 | 1127.56 | 4.00   | 3538.52   | 3.E-08 |
| P07355 | (51)STVHEILCK              | 1127.56 | 1127.56 | 0.00   | 1.76      | 3.E-08 |
| P07355 | AYTNFDAERDALNIETAIK        | 2154.07 | 2154.06 | 0.01   | 2.47      | 3.E-08 |
| P08758 | TLFGRDLLDDLK               | 1404.76 | 1404.76 | 0.00   | 0.61      | 3.E-08 |
| P07900 | IRYESLTDPSK                | 1307.67 | 1307.67 | 0.00   | 0.68      | 3.E-08 |

|        |                             |         |         |       |          |        |
|--------|-----------------------------|---------|---------|-------|----------|--------|
| Q9BUH6 | VPGPEAAPRLRALTLGLAK         | 1929.15 | 1929.15 | 0.00  | 0.72     | 3.E-08 |
| P46781 | AARELLTLDEK                 | 1256.63 | 1257.69 | -1.06 | -845.06  | 3.E-08 |
| Q15393 | KLEDIRTRYAF                 | 1412.68 | 1410.76 | 1.92  | 1362.35  | 3.E-08 |
| P62841 | HGRPGIGATHSSRFIPLK          | 1928.04 | 1930.06 | -2.02 | -1045.46 | 3.E-08 |
| O00425 | ILAHNNFVGRLLIGK             | 1551.91 | 1550.90 | 1.01  | 648.17   | 3.E-08 |
| Q9Y224 | YLRDVNCPFK                  | 1316.69 | 1310.64 | 6.05  | 4598.60  | 3.E-08 |
| Q9Y224 | YLRDVNCPFK                  | 1315.68 | 1310.64 | 5.04  | 3829.78  | 3.E-08 |
| Q9Y224 | YLRDVNCPFK                  | 1311.64 | 1310.64 | 1.00  | 765.73   | 3.E-08 |
| P11021 | PYIQVDIGGGQTK               | 1376.75 | 1374.71 | 2.04  | 1482.39  | 3.E-08 |
| Q14683 | TRHLALNLQEK                 | 1321.75 | 1321.75 | 0.00  | 3.01     | 3.E-08 |
| P08670 | VESLQEEIAFLK                | 1407.76 | 1404.75 | 3.01  | 2139.63  | 3.E-08 |
| Q9BV38 | INRDLDFDFSTRFITRPAK         | 2196.19 | 2196.18 | 0.01  | 2.72     | 3.E-08 |
| P08758 | TLFGRDLLDDLK                | 1404.76 | 1404.76 | 0.00  | 0.75     | 3.E-08 |
| P07355 | SALSGHLETVILGLLKTPAQYDASELK | 2910.58 | 2853.55 | 57.03 | 19592.40 | 3.E-08 |
| P61978 | IILDLISESPIK                | 1339.80 | 1339.80 | 0.00  | 2.66     | 3.E-08 |

|        |                    |         |         |       |          |        |
|--------|--------------------|---------|---------|-------|----------|--------|
| P61978 | IILDLISESPIK       | 1337.68 | 1339.80 | -2.12 | -1586.36 | 3.E-08 |
| P18621 | EQIVPKPEEEVAQK     | 1624.76 | 1622.85 | 1.91  | 1176.78  | 3.E-08 |
| P18621 | EQIVPKPEEEVAQK     | 1622.85 | 1622.85 | 0.00  | 0.42     | 3.E-08 |
| O43818 | AEARAFEEDQVAGRLK   | 1789.86 | 1788.91 | 0.95  | 528.19   | 4.E-08 |
| O43818 | AEARAFEEDQVAGRLK   | 1788.92 | 1788.91 | 0.01  | 3.23     | 4.E-08 |
| P09661 | TFNPGAGLPTDKK      | 1344.70 | 1344.70 | 0.00  | 0.94     | 4.E-08 |
| P20700 | EELRELNDR LAVYIDK  | 1975.04 | 1975.04 | 0.00  | -0.21    | 4.E-08 |
| Q15393 | KLEDIRTRYAF        | 1410.76 | 1410.76 | 0.00  | 1.33     | 4.E-08 |
| P11021 | ELEEIVQPIISK       | 1396.80 | 1396.78 | 0.02  | 16.03    | 4.E-08 |
| P11021 | ELEEIVQPIISK       | 1396.78 | 1396.78 | 0.00  | 1.13     | 4.E-08 |
| P19388 | EEVTELLARYK        | 1350.72 | 1349.72 | 1.00  | 744.00   | 4.E-08 |
| P19338 | GLSEDTTEETLK       | 1321.62 | 1321.62 | 0.00  | 1.37     | 4.E-08 |
| Q9BQ39 | SRYEQVDLVGK        | 1293.78 | 1292.67 | 1.11  | 854.44   | 4.E-08 |
| P08758 | VLTEIIASRTPEELRAIK | 2041.19 | 2038.18 | 3.01  | 1474.49  | 4.E-08 |
| P11021 | PYIQVDIGGGQTK      | 1379.68 | 1374.71 | 4.97  | 3601.33  | 4.E-08 |

|        |                          |         |         |       |          |        |
|--------|--------------------------|---------|---------|-------|----------|--------|
| P11021 | PYIQVDIGGGQTK            | 1377.80 | 1374.71 | 3.09  | 2244.29  | 4.E-08 |
| P46781 | AARELLTLDEK              | 1257.71 | 1257.69 | 0.02  | 18.34    | 4.E-08 |
| P46781 | AARELLTLDEK              | 1257.69 | 1257.69 | 0.00  | 0.53     | 4.E-08 |
| P46781 | AARELLTLDEK              | 1257.67 | 1257.69 | -0.02 | -12.83   | 4.E-08 |
| P11021 | VLESDLKKSIDEIVLVGGSTRIPK | 2891.50 | 2825.54 | 65.96 | 22810.30 | 4.E-08 |
| P36578 | AFRNIPGITLLNVSK          | 1641.97 | 1641.96 | 0.01  | 3.23     | 4.E-08 |
| Q01130 | (51)SYGRPPPDVEGMTSLK     | 1774.86 | 1774.86 | 0.00  | 0.17     | 4.E-08 |
| P02545 | ERARLQLELSK              | 1341.77 | 1341.77 | 0.00  | -0.02    | 4.E-08 |
| P61978 | IILDLISESPIK             | 1340.74 | 1339.80 | 0.94  | 702.27   | 4.E-08 |
| P61978 | IILDLISESPIK             | 1339.80 | 1339.80 | 0.00  | 0.35     | 4.E-08 |
| P61978 | IILDLISESPIK             | 1339.78 | 1339.80 | -0.02 | -12.71   | 4.E-08 |
| P08670 | VESLQEEIAFLK             | 1406.76 | 1404.75 | 2.01  | 1428.66  | 4.E-08 |
| P69905 | TYFPFDLSHGSAQVK          | 1832.88 | 1832.88 | 0.00  | 0.02     | 4.E-08 |
| Q9BQ39 | SRYEQVDLVGK              | 1292.67 | 1292.67 | 0.00  | 0.89     | 4.E-08 |
| Q9BQ39 | SRYEQVDLVGK              | 1292.58 | 1292.67 | -0.09 | -68.81   | 4.E-08 |

|        |                                    |         |         |         |           |        |
|--------|------------------------------------|---------|---------|---------|-----------|--------|
| P14866 | NPNGPYPYTLK                        | 1263.61 | 1262.63 | 0.98    | 779.02    | 4.E-08 |
| P14866 | NPNGPYPYTLK                        | 1262.63 | 1262.63 | 0.00    | -0.18     | 4.E-08 |
| P62841 | HGRPGIGATHSSRFIPLK                 | 1931.04 | 1930.06 | 0.98    | 506.15    | 4.E-08 |
| P62841 | HGRPGIGATHSSRFIPLK                 | 1930.06 | 1930.06 | 0.00    | 1.19      | 4.E-08 |
| P16403 | ERSGVSLAALK                        | 1132.65 | 1129.65 | 3.00    | 2648.76   | 4.E-08 |
| Q13310 | SGVGNVFIKNLDKSIDNKALYDTFSAFGNILSCK | 3598.86 | 3734.90 | -136.04 | -37802.00 | 4.E-08 |
| O75531 | PVGSLAGIGEVLGK                     | 1295.74 | 1295.74 | 0.00    | 0.50      | 4.E-08 |
| P09661 | TFNPGAGLPTDKK                      | 1348.72 | 1344.70 | 4.02    | 2980.20   | 5.E-08 |
| P46781 | AARELLTLDEK                        | 1259.59 | 1257.69 | 1.90    | 1504.67   | 5.E-08 |
| Q14254 | ELLAVACEQFLGK                      | 1478.74 | 1476.76 | 1.98    | 1336.66   | 5.E-08 |
| Q14254 | ELLAVACEQFLGK                      | 1476.77 | 1476.76 | 0.01    | 9.94      | 5.E-08 |
| Q14254 | ELLAVACEQFLGK                      | 1471.74 | 1476.76 | -5.02   | -3413.86  | 5.E-08 |
| P20042 | IFDIDEAEEGVK                       | 1363.86 | 1363.65 | 0.21    | 153.33    | 5.E-08 |
| P20042 | IFDIDEAEEGVK                       | 1363.65 | 1363.65 | 0.00    | 2.80      | 5.E-08 |
| P08621 | TLFVARVNYDTTESK                    | 1742.89 | 1742.88 | 0.01    | 3.33      | 5.E-08 |

|        |                                         |         |         |       |         |        |
|--------|-----------------------------------------|---------|---------|-------|---------|--------|
| P35527 | NYSPYYNTIDDLK                           | 1604.74 | 1604.74 | 0.00  | 1.34    | 5.E-08 |
| Q9H2P0 | RTYEQMEFLLKKRKLDDSDSPSFFEEKPEEPVVLALDPK | 4872.35 | 4865.45 | 6.90  | 1415.59 | 5.E-08 |
| P40429 | RGQAALDRLK                              | 1126.66 | 1126.66 | 0.00  | 0.92    | 5.E-08 |
| P07900 | IRYESLTDPSK                             | 1307.67 | 1307.67 | 0.00  | 0.45    | 5.E-08 |
| P16403 | ERSGVSLAALK                             | 1130.66 | 1129.65 | 1.01  | 890.02  | 5.E-08 |
| P69905 | VGAHAGEYGAEALERMFLSFPTTK                | 2597.26 | 2581.26 | 16.00 | 6159.24 | 5.E-08 |
| P20700 | ALYETELADARRALDDTARERAK                 | 2633.35 | 2633.35 | 0.00  | 1.37    | 5.E-08 |
| Q9H307 | (41)AVAVRTLQEQLK                        | 1525.85 | 1525.85 | 0.00  | 2.81    | 5.E-08 |
| P08107 | AQIHDLVLVGGSTRIPK                       | 1803.04 | 1803.04 | 0.00  | 1.04    | 5.E-08 |
| P67809 | GAEAAVNTGPGGVPVQGSK                     | 1694.87 | 1694.86 | 0.01  | 3.83    | 5.E-08 |
| P02545 | EGDLIAAQARLK                            | 1295.65 | 1283.72 | 11.93 | 9204.82 | 5.E-08 |
| P02545 | EGDLIAAQARLK                            | 1293.64 | 1283.72 | 9.92  | 7668.81 | 5.E-08 |
| O75526 | SRGFVTFESPADAK                          | 1728.85 | 1728.85 | 0.00  | 2.26    | 5.E-08 |
| P28370 | RDFNQFIK                                | 1066.56 | 1066.56 | 0.00  | 1.44    | 5.E-08 |
| P62701 | VRTDITYPAGFMDVISDK                      | 2140.09 | 2140.09 | 0.00  | 0.23    | 5.E-08 |



|        |                        |         |         |         |           |        |
|--------|------------------------|---------|---------|---------|-----------|--------|
| P16403 | ERSGVSLAALK            | 1129.65 | 1129.65 | 0.00    | 0.80      | 6.E-08 |
| P43243 | LVLRIPIRIGIDLLK        | 1619.02 | 1619.02 | 0.00    | 0.74      | 6.E-08 |
| Q9H307 | (41)AVAVRTLQEQLK       | 1528.85 | 1525.85 | 3.00    | 1962.45   | 6.E-08 |
| Q9H307 | (41)AVAVRTLQEQLK       | 1525.85 | 1525.85 | 0.00    | 0.78      | 6.E-08 |
| P43243 | ITPENLPQILLQLK         | 1626.83 | 1618.97 | 7.86    | 4829.80   | 6.E-08 |
| P46778 | EPELLEPIPYEFMA         | 1695.90 | 1676.80 | 19.10   | 11259.50  | 6.E-08 |
| P46778 | EPELLEPIPYEFMA         | 1692.80 | 1676.80 | 16.00   | 9449.09   | 6.E-08 |
| P46778 | EPELLEPIPYEFMA         | 1692.77 | 1676.80 | 15.97   | 9433.11   | 6.E-08 |
| P11021 | PYIQVDIGGGQTK          | 1374.85 | 1374.71 | 0.14    | 104.01    | 6.E-08 |
| P14136 | VRFLEQQNK              | 1160.63 | 1160.63 | 0.00    | 2.24      | 6.E-08 |
| Q9Y265 | GLGLDESLAK             | 1058.56 | 1058.56 | 0.00    | 2.40      | 6.E-08 |
| P62917 | RTELFIAAEGIHTGQFVYCGKK | 2410.21 | 2524.29 | -114.08 | -47332.30 | 6.E-08 |
| P62906 | RFSGTVRLK              | 1062.63 | 1062.63 | 0.00    | 0.76      | 6.E-08 |
| P14136 | VRFLEQQNK              | 1160.63 | 1160.63 | 0.00    | 2.33      | 6.E-08 |
| P62241 | YELGRPAANTK            | 1218.64 | 1218.64 | 0.00    | 0.77      | 6.E-08 |

|        |                             |         |         |         |           |        |
|--------|-----------------------------|---------|---------|---------|-----------|--------|
| P63220 | QNDAGEFVDLYVPRK             | 1938.92 | 1749.87 | 189.05  | 97502.40  | 6.E-08 |
| P02545 | QREFESRLADALQELRAQHEDQVEQYK | 3187.52 | 3315.62 | -128.10 | -40187.40 | 6.E-08 |
| P06748 | DYHFKVDNDENEHQLSLRTVSLGAGAK | 3065.64 | 3042.48 | 23.16   | 7555.33   | 6.E-08 |
| P06748 | DYHFKVDNDENEHQLSLRTVSLGAGAK | 3057.58 | 3042.48 | 15.10   | 4939.27   | 6.E-08 |
| P04083 | ALTGHLEEVVLALLK             | 1604.95 | 1604.95 | 0.00    | 0.50      | 7.E-08 |
| P62917 | RTELFIAAEGIHTGQFVYCGKK      | 2410.21 | 2524.29 | -114.08 | -47333.80 | 7.E-08 |
| P11021 | ELEEIVQPIISK                | 1391.78 | 1396.78 | -5.00   | -3589.07  | 7.E-08 |
| P02545 | NIYSEELRETK                 | 1380.69 | 1380.69 | 0.00    | 3.12      | 7.E-08 |
| P07900 | IRYESLTDPSK                 | 1310.68 | 1307.67 | 3.01    | 2298.10   | 7.E-08 |
| P11021 | PYIQVDIGGGQTK               | 1374.71 | 1374.71 | 0.00    | 0.94      | 7.E-08 |
| P11021 | PYIQVDIGGGQTK               | 1373.85 | 1374.71 | -0.86   | -625.47   | 7.E-08 |
| P16403 | ASGPPVSELITK                | 1198.60 | 1197.66 | 0.94    | 788.19    | 7.E-08 |
| P16403 | ASGPPVSELITK                | 1197.66 | 1197.66 | 0.00    | 2.19      | 7.E-08 |
| P16403 | ASGPPVSELITK                | 1197.65 | 1197.66 | -0.01   | -11.33    | 7.E-08 |
| O75531 | PVGLAGIGEVLGK               | 1299.71 | 1295.74 | 3.97    | 3054.63   | 7.E-08 |

|        |                               |         |         |        |           |        |
|--------|-------------------------------|---------|---------|--------|-----------|--------|
| O75531 | PVGSLAGIGEVLGK                | 1296.64 | 1295.74 | 0.90   | 696.45    | 7.E-08 |
| Q96JM3 | T(37)SPASLDFPESQK             | 1409.74 | 1485.64 | -75.90 | -53840.70 | 7.E-08 |
| Q96JM3 | T(37)SPASLDFPESQK             | 1405.68 | 1485.64 | -79.96 | -56885.80 | 7.E-08 |
| P02545 | ERARLQLELSK                   | 1346.72 | 1341.77 | 4.95   | 3674.09   | 7.E-08 |
| P02545 | ERARLQLELSK                   | 1341.77 | 1341.77 | 0.00   | 0.13      | 7.E-08 |
| P11940 | NLDDGIDDERLRK                 | 1557.77 | 1557.77 | 0.00   | 1.18      | 7.E-08 |
| P16403 | ERSGVSLAALK                   | 1125.57 | 1129.65 | -4.08  | -3622.79  | 7.E-08 |
| P23396 | GGKPEPPAMPQPVPTA              | 1569.77 | 1572.80 | -3.03  | -1927.14  | 7.E-08 |
| P23396 | GGKPEPPAMPQPVPTA              | 1569.70 | 1572.80 | -3.10  | -1974.12  | 7.E-08 |
| P07355 | GLGTDEDSLIEIICSRTNQELQEINRVYK | 3392.69 | 3392.69 | 0.00   | 1.25      | 7.E-08 |
| Q49A26 | (41)AAVSLRLGDLVWGK            | 1525.86 | 1525.86 | 0.00   | 2.13      | 7.E-08 |
| P08107 | HWPFQVINDGDKPK                | 1680.85 | 1679.84 | 1.01   | 598.24    | 7.E-08 |
| P33993 | LFADAVQELLQPQYK               | 1633.87 | 1633.87 | 0.00   | -0.32     | 8.E-08 |
| P19338 | GFGFVDFNSEEDAK                | 1560.67 | 1560.67 | 0.00   | 1.34      | 8.E-08 |
| P19338 | GFGFVDFNSEEDAK                | 1559.84 | 1560.67 | -0.83  | -532.05   | 8.E-08 |

|        |                     |         |         |       |          |        |
|--------|---------------------|---------|---------|-------|----------|--------|
| P19338 | GFGFVDFNSEEDAK      | 1555.87 | 1560.67 | -4.80 | -3088.00 | 8.E-08 |
| P11142 | NQVAMNPTNTVFDK      | 1657.84 | 1648.79 | 9.05  | 5461.38  | 8.E-08 |
| P11142 | NQVAMNPTNTVFDK      | 1653.86 | 1648.79 | 5.07  | 3063.57  | 8.E-08 |
| P08758 | VLTEIIASRTPEELRAIK  | 2038.18 | 2038.18 | 0.00  | 1.52     | 8.E-08 |
| P05787 | WSLLQQQK            | 1029.56 | 1029.56 | 0.00  | 2.40     | 8.E-08 |
| O43818 | LYLEQLRQQEEEK       | 1704.88 | 1704.87 | 0.01  | 3.73     | 8.E-08 |
| O43818 | LYLEQLRQQEEEK       | 1704.83 | 1704.87 | -0.04 | -22.84   | 8.E-08 |
| P06748 | NCFRMTDQEAIQDLWQWRK | 2524.40 | 2524.17 | 0.23  | 91.84    | 8.E-08 |
| P06748 | NCFRMTDQEAIQDLWQWRK | 2524.36 | 2524.17 | 0.19  | 74.05    | 8.E-08 |
| P06748 | NCFRMTDQEAIQDLWQWRK | 2524.17 | 2524.17 | 0.00  | -0.42    | 8.E-08 |
| Q8TC04 | ATMQNLNDRLASYVEK    | 1851.91 | 1851.91 | 0.00  | 2.44     | 8.E-08 |
| Q9BWF3 | NYGFVHIEDK          | 1222.68 | 1220.58 | 2.10  | 1715.03  | 8.E-08 |
| Q9BWF3 | NYGFVHIEDK          | 1220.58 | 1220.58 | 0.00  | 0.52     | 8.E-08 |
| P08107 | LLQDFFNDRDLNK       | 1579.80 | 1578.82 | 0.98  | 623.23   | 8.E-08 |
| P08107 | LLQDFFNDRDLNK       | 1578.82 | 1578.82 | 0.00  | -0.07    | 8.E-08 |

|        |                                                        |         |         |         |            |        |
|--------|--------------------------------------------------------|---------|---------|---------|------------|--------|
| P02545 | LRDLEDGLARERDTSRRLLAEK                                 | 2641.43 | 2641.43 | 0.00    | 0.14       | 8.E-08 |
| P23396 | GGKPEPPAMPQPVPTA                                       | 1572.80 | 1572.80 | 0.00    | 0.33       | 9.E-08 |
| P46782 | (49)M(52)TEWETAAPAVAETPDIKLFGKWSTDDVQINDISLQD<br>YIAVK | 4900.34 | 4792.35 | 107.99  | 22036.60   | 9.E-08 |
| P46782 | (49)M(52)TEWETAAPAVAETPDIKLFGKWSTDDVQINDISLQD<br>YIAVK | 4900.22 | 4792.35 | 107.87  | 22012.60   | 9.E-08 |
| P26599 | NNQFQALLQYADPVSAQHAK                                   | 2242.11 | 2242.11 | 0.00    | 1.14       | 9.E-08 |
| P07355 | DIISDTSGDFRK                                           | 1352.66 | 1352.66 | 0.00    | 0.53       | 9.E-08 |
| Q09666 | GGQIGLQAPGLSVSGPQGHLESGSGK                             | 2417.23 | 2417.23 | 0.00    | 1.47       | 9.E-08 |
| P02545 | RTLEGELHDLRGQVAKLEAALGEAK                              | 2760.49 | 2703.47 | 57.02   | 20655.60   | 1.E-07 |
| P06748 | MSVQPTVSLGGFEITPPVVLRLK                                | 2483.40 | 2467.39 | 16.01   | 6444.93    | 1.E-07 |
| P08107 | ATAGDTHLGGEDFDNRLVNHVFVEEFK                            | 2917.36 | 2917.36 | 0.00    | -0.87      | 1.E-07 |
| P62917 | LARASGNYATVISHNPETK                                    | 2033.02 | 2028.04 | 4.98    | 2447.19    | 1.E-07 |
| O43852 | TFDQLTPEESK                                            | 1293.61 | 1293.61 | 0.00    | 2.98       | 1.E-07 |
| A6NGW7 | LVVDFSATWCGPCKMIK                                      | 1775.82 | 2010.97 | -235.15 | -132417.00 | 1.E-07 |
| A3R0T7 | AVTASKERSGVSLAALK                                      | 1691.87 | 1686.96 | 4.91    | 2904.00    | 1.E-07 |
| P61981 | (54)VDREQLVQK                                          | 1155.62 | 1155.62 | 0.00    | 1.38       | 1.E-07 |

|        |                                      |         |         |         |            |        |
|--------|--------------------------------------|---------|---------|---------|------------|--------|
| P61981 | (54)VDREQLVQK                        | 1155.60 | 1155.62 | -0.02   | -18.26     | 1.E-07 |
| P61981 | (54)VDREQLVQK                        | 1153.54 | 1155.62 | -2.08   | -1802.19   | 1.E-07 |
| P27635 | EHVIEALRRAK                          | 1192.66 | 1320.76 | -128.10 | -107402.00 | 1.E-07 |
| P27635 | EHVIEALRRAK                          | 1192.65 | 1320.76 | -128.11 | -107416.00 | 1.E-07 |
| P62081 | DVNFEFPEFQL                          | 1383.63 | 1383.63 | 0.00    | -1.41      | 1.E-07 |
| P62081 | DVNFEFPEFQL                          | 1383.61 | 1383.63 | -0.02   | -14.57     | 1.E-07 |
| P62081 | DVNFEFPEFQL                          | 1383.60 | 1383.63 | -0.03   | -24.90     | 1.E-07 |
| Q6DKI1 | IPLVPENLLK                           | 1134.70 | 1134.70 | 0.00    | 0.96       | 1.E-07 |
| Q3BDU5 | LVRSVTVVEDDEDEDGDDLLHHHHVSGSRR       | 3422.62 | 3422.62 | 0.00    | -0.37      | 1.E-07 |
| O43390 | IPRDLYEDELVPLFEK                     | 1976.04 | 1975.03 | 1.01    | 508.85     | 1.E-07 |
| P56182 | LQDLAGGIFPEDEIPEKACRRLLEGRRQKKTCK    | 3761.99 | 3879.13 | -117.14 | -31137.60  | 1.E-07 |
| P62241 | ELEFYLRK                             | 1096.59 | 1096.59 | 0.00    | 0.93       | 1.E-07 |
| P19338 | GLSEDTEETLK                          | 1322.62 | 1321.62 | 1.00    | 759.56     | 1.E-07 |
| P61978 | KIIPTLEEGQLPSPTATSQLPLESDAVECLNYQHYP | 4068.05 | 4182.12 | -114.07 | -28039.90  | 1.E-07 |
| P20700 | ALYETELADARRALDDTARERAK              | 2633.35 | 2633.35 | 0.00    | 1.18       | 1.E-07 |

|        |                               |         |         |       |          |        |
|--------|-------------------------------|---------|---------|-------|----------|--------|
| P02545 | EGDLIAAQARLK                  | 1283.72 | 1283.72 | 0.00  | 0.92     | 1.E-07 |
| P09651 | EDTEEHHLRDYFEQYGK             | 2194.96 | 2194.96 | 0.00  | 1.03     | 1.E-07 |
| O94776 | DFNDIRQDFLPWK                 | 1698.98 | 1692.83 | 6.15  | 3617.67  | 1.E-07 |
| Q8IVT2 | VRAVPTWASVQVVDDPGSLASVESPGTPK | 2948.52 | 2948.52 | 0.00  | 0.21     | 1.E-07 |
| P41219 | MALDIEIATYRK                  | 1438.75 | 1422.75 | 16.00 | 11119.70 | 1.E-07 |
| A6NJC9 | STYQEFTDHLVK                  | 1469.76 | 1466.70 | 3.06  | 2080.51  | 1.E-07 |
| Q13765 | NILFVITKPDVYK                 | 1552.89 | 1548.89 | 4.00  | 2576.01  | 1.E-07 |
| Q13765 | NILFVITKPDVYK                 | 1548.89 | 1548.89 | 0.00  | 0.95     | 1.E-07 |
| Q9P013 | GEGDLSQLSK                    | 1035.65 | 1032.51 | 3.14  | 3028.22  | 1.E-07 |
| P16403 | ERSGVSLAALK                   | 1129.65 | 1129.65 | 0.00  | 2.66     | 1.E-07 |
| P62424 | RPPVLRAGVNTVTTLVENK           | 2063.19 | 2063.19 | 0.00  | 0.73     | 1.E-07 |
| P33993 | FLQEFYQDDELGKK                | 1767.86 | 1758.85 | 9.01  | 5098.86  | 1.E-07 |
| Q9BVC5 | SPPLSPVGTTTPVK                | 1281.64 | 1278.72 | 2.92  | 2279.33  | 1.E-07 |
| P08579 | ELGSSTNALRQLQGFFPYGK          | 2216.07 | 2212.13 | 3.94  | 1776.96  | 1.E-07 |
| P08579 | ELGSSTNALRQLQGFFPYGK          | 2212.13 | 2212.13 | 0.00  | 1.97     | 1.E-07 |

|        |                         |         |         |       |          |        |
|--------|-------------------------|---------|---------|-------|----------|--------|
| P07305 | YSDMIVAAIQAEK           | 1444.74 | 1437.72 | 7.02  | 4862.43  | 1.E-07 |
| P04083 | ALTGHLEEVVLALLK         | 1665.97 | 1604.95 | 61.02 | 36625.80 | 1.E-07 |
| P04083 | ALTGHLEEVVLALLK         | 1661.97 | 1604.95 | 57.02 | 34310.50 | 1.E-07 |
| P41219 | MALDIEIATYRK            | 1438.75 | 1422.75 | 16.00 | 11119.90 | 1.E-07 |
| A3R0T7 | AVTASKERSGVSLAALK       | 1691.87 | 1686.96 | 4.91  | 2904.06  | 1.E-07 |
| P27635 | EHVIEALRRAK             | 1320.76 | 1320.76 | 0.00  | 0.84     | 1.E-07 |
| P02545 | LRDLEDSELRERDTSRRLLAEK  | 2641.43 | 2641.43 | 0.00  | 0.82     | 1.E-07 |
| P02545 | LRDLEDSELRERDTSRRLLAEK  | 2641.43 | 2641.43 | 0.00  | 1.69     | 1.E-07 |
| P04083 | ALTGHLEEVVLALLK         | 1604.95 | 1604.95 | 0.00  | -0.37    | 1.E-07 |
| Q8WUM0 | DLLQADQLGSLK            | 1303.73 | 1299.70 | 4.03  | 3090.66  | 1.E-07 |
| Q8WUM0 | DLLQADQLGSLK            | 1299.70 | 1299.70 | 0.00  | 1.30     | 1.E-07 |
| Q8WUM0 | DLLQADQLGSLK            | 1298.78 | 1299.70 | -0.92 | -711.90  | 1.E-07 |
| P14136 | VERFLEQQNK              | 1161.52 | 1160.63 | 0.89  | 762.11   | 1.E-07 |
| P14136 | VERFLEQQNK              | 1160.63 | 1160.63 | 0.00  | 1.99     | 1.E-07 |
| P06748 | MSVQPTVSLGGFEITPPVVLRLK | 2483.38 | 2467.39 | 15.99 | 6440.21  | 1.E-07 |



|        |                           |         |         |        |           |        |
|--------|---------------------------|---------|---------|--------|-----------|--------|
| P06748 | MSVQPTVSLGGFEITPPVVLRLK   | 2483.34 | 2467.39 | 15.95  | 6422.61   | 1.E-07 |
| Q9UKX7 | VAAETQSPSLFGSTK           | 1521.77 | 1521.77 | 0.00   | 2.85      | 2.E-07 |
| O60506 | LDEIYVAGLVAHSDLDERAIEALK  | 2639.38 | 2639.38 | 0.00   | -0.90     | 2.E-07 |
| Q9BQG0 | VTENLRVLGEAQTK            | 1560.79 | 1556.85 | 3.94   | 2527.37   | 2.E-07 |
| Q9BQG0 | VTENLRVLGEAQTK            | 1556.85 | 1556.85 | 0.00   | 2.06      | 2.E-07 |
| P62906 | RFSGTVRLK                 | 1062.63 | 1062.63 | 0.00   | 0.85      | 2.E-07 |
| P84090 | MSHTILLVQPTK              | 1334.75 | 1366.76 | -32.01 | -23979.80 | 2.E-07 |
| Q9ULU4 | PFSPQLSAPITTK             | 1385.76 | 1385.76 | 0.00   | 1.12      | 2.E-07 |
| P02545 | LRDLEDLARERDTSRRLLAEK     | 2641.43 | 2641.43 | 0.00   | 0.71      | 2.E-07 |
| P05549 | GPVSLSKSNSNAVSAIPINK      | 1977.96 | 1982.08 | -4.12  | -2083.83  | 2.E-07 |
| P20700 | HETRLVEVDSGRQIEYKY        | 2352.17 | 2350.16 | 2.01   | 853.04    | 2.E-07 |
| Q8N3U4 | EPNPQGESHPLNLAFLDILSEFSSK | 2865.42 | 2865.42 | 0.00   | 1.42      | 2.E-07 |
| Q8NCA5 | RLDVTVQSFGWSDRAK          | 1863.96 | 1863.96 | 0.00   | 2.30      | 2.E-07 |
| P46781 | AARELLTLDEK               | 1257.69 | 1257.69 | 0.00   | 1.32      | 2.E-07 |
| P46781 | AARELLTLDEK               | 1255.68 | 1257.69 | -2.01  | -1604.66  | 2.E-07 |

|        |                                        |         |         |        |           |        |
|--------|----------------------------------------|---------|---------|--------|-----------|--------|
| P04083 | MYGISLCQAILDETK                        | 1756.84 | 1740.84 | 16.00  | 9107.06   | 2.E-07 |
| Q00839 | PYFPIPEEYTFIQNVPLEDRVRGPK              | 3003.55 | 3003.55 | 0.00   | 0.30      | 2.E-07 |
| Q9UKX7 | VAAETQSPSLFGSTK                        | 1520.73 | 1521.77 | -1.04  | -681.42   | 2.E-07 |
| P60709 | QEYDESGPSIVHRK                         | 1626.77 | 1643.79 | -17.02 | -10463.50 | 2.E-07 |
| Q9BVC5 | SPPLSPVGTTPVK                          | 1278.72 | 1278.72 | 0.00   | 0.45      | 2.E-07 |
| P02545 | LESTESRSSFSQHARTSGRVAVEEVDEEGK FVRLRNK | 4152.10 | 4220.13 | -68.03 | -16383.80 | 2.E-07 |
| P07355 | GLGTDEDSLIEIICSRTNQELQEINRVYK          | 3404.68 | 3392.69 | 11.99  | 3522.05   | 2.E-07 |
| P07355 | GLGTDEDSLIEIICSRTNQELQEINRVYK          | 3400.79 | 3392.69 | 8.10   | 2381.11   | 2.E-07 |
| P11142 | SQIHDIVLVGGSTRIPK                      | 1819.03 | 1819.03 | 0.00   | -0.02     | 2.E-07 |
| Q9GZL7 | YAVDDVPFSIPAASEIADLSNIINK              | 2661.36 | 2661.35 | 0.01   | 3.04      | 2.E-07 |
| O15504 | IPLKPPPLELLNV                          | 1441.89 | 1441.89 | 0.00   | 2.36      | 2.E-07 |
| P16401 | ATGPPVSELITK                           | 1212.66 | 1211.68 | 0.98   | 805.49    | 2.E-07 |
| P15880 | SLEEIYLFSLPIK                          | 1551.86 | 1550.86 | 1.00   | 646.54    | 2.E-07 |
| Q14254 | QIAVEAQEILRTDK                         | 1599.85 | 1612.88 | -13.03 | -8143.01  | 2.E-07 |
| Q14254 | QIAVEAQEILRTDK                         | 1595.86 | 1612.88 | -17.02 | -10666.60 | 2.E-07 |

|        |                                     |         |         |       |         |        |
|--------|-------------------------------------|---------|---------|-------|---------|--------|
| P20700 | ALYETELADARRALDDTARERAK             | 2633.35 | 2633.35 | 0.00  | 1.45    | 2.E-07 |
| P61978 | ALRTDYNASVSPDSSGPERILSISADIETIGEILK | 3815.98 | 3815.98 | 0.00  | -1.21   | 2.E-07 |
| P08107 | EIAEAYLGYPVTVNAVITVPAYFNDSQRQATK    | 3428.73 | 3428.73 | 0.00  | -0.46   | 2.E-07 |
| P02545 | AGQVVTIWAAGAGATHSPPTDLVWK           | 2532.32 | 2532.31 | 0.01  | 2.08    | 2.E-07 |
| P05787 | LVSESSDVLPK                         | 1174.65 | 1172.63 | 2.02  | 1719.45 | 2.E-07 |
| Q8WVK2 | GGFNRPLDFIA                         | 1205.62 | 1205.62 | 0.00  | 1.18    | 2.E-07 |
| P12235 | TAVAPIERVK                          | 1082.64 | 1082.64 | 0.00  | 0.49    | 2.E-07 |
| P62917 | LARASGNYATVISHNPETK                 | 2028.04 | 2028.04 | 0.00  | 0.92    | 2.E-07 |
| O60832 | (41)ADAEVILPK                       | 1110.57 | 1109.63 | 0.94  | 846.12  | 2.E-07 |
| O60832 | (41)ADAEVILPK                       | 1109.63 | 1109.63 | 0.00  | 2.41    | 2.E-07 |
| O60832 | (41)ADAEVILPK                       | 1108.69 | 1109.63 | -0.94 | -845.88 | 2.E-07 |
| P11142 | SQIHDIVLVGGSTRIPK                   | 1820.98 | 1819.03 | 1.95  | 1073.57 | 2.E-07 |
| P61247 | GRVFEVSLADLQNDEVAFRK                | 2295.26 | 2292.19 | 3.07  | 1335.59 | 2.E-07 |
| P61247 | GRVFEVSLADLQNDEVAFRK                | 2292.19 | 2292.19 | 0.00  | 0.18    | 2.E-07 |
| O43328 | KVEQPVIEEPALK                       | 1483.80 | 1478.83 | 4.97  | 3349.63 | 2.E-07 |

|        |                     |         |         |        |          |        |
|--------|---------------------|---------|---------|--------|----------|--------|
| P16401 | ATGPPVSELITK        | 1216.61 | 1211.68 | 4.93   | 4055.67  | 2.E-07 |
| P16401 | ATGPPVSELITK        | 1215.63 | 1211.68 | 3.95   | 3248.92  | 2.E-07 |
| P16401 | ATGPPVSELITK        | 1211.68 | 1211.68 | 0.00   | 0.64     | 2.E-07 |
| Q12874 | KWENGTTPGWPK        | 1445.71 | 1445.71 | 0.00   | 2.59     | 2.E-07 |
| O15504 | IPLKPPPLELLNV       | 1438.75 | 1441.89 | -3.14  | -2181.19 | 2.E-07 |
| P60903 | EFPGFLENQK          | 1207.59 | 1207.59 | 0.00   | 0.90     | 2.E-07 |
| P08758 | PSRLYDAYELK         | 1353.78 | 1353.69 | 0.09   | 64.75    | 3.E-07 |
| P08758 | PSRLYDAYELK         | 1353.69 | 1353.69 | 0.00   | 1.37     | 3.E-07 |
| Q8IYB3 | DAGFFRGTSAEQDNRFNSK | 2335.03 | 2145.98 | 189.05 | 80961.80 | 3.E-07 |
| P14136 | VRFLEQQNK           | 1160.63 | 1160.63 | 0.00   | 2.07     | 3.E-07 |
| P27635 | EHVIEALRRAK         | 1325.72 | 1320.76 | 4.96   | 3743.55  | 3.E-07 |
| P27635 | EHVIEALRRAK         | 1316.80 | 1320.76 | -3.96  | -3005.29 | 3.E-07 |
| P27635 | EHVIEALRRAK         | 1316.78 | 1320.76 | -3.98  | -3019.69 | 3.E-07 |
| P02545 | EAALSTALSEK         | 1118.58 | 1118.58 | 0.00   | -0.08    | 3.E-07 |
| P02545 | EAALSTALSEK         | 1118.55 | 1118.58 | -0.03  | -24.13   | 3.E-07 |

|        |                                  |         |         |        |           |        |
|--------|----------------------------------|---------|---------|--------|-----------|--------|
| A6NIM7 | TIAECLAEELINAAKGSSNSYAIK         | 2472.40 | 2552.28 | -79.88 | -32310.50 | 3.E-07 |
| A6NIM7 | TIAECLAEELINAAKGSSNSYAIK         | 2468.40 | 2552.28 | -83.88 | -33982.40 | 3.E-07 |
| P02545 | LRDLEDRLARERDTSRRLLAEK           | 2642.43 | 2641.43 | 1.00   | 380.02    | 3.E-07 |
| Q9UKX7 | VAAETQSPSLFGSTK                  | 1526.75 | 1521.77 | 4.98   | 3264.73   | 3.E-07 |
| O95926 | (41)AAIAASEVLVDSAEEGSLAAAAELAAQK | 2697.37 | 2697.37 | 0.00   | 0.25      | 3.E-07 |
| P34931 | VEIANDQGNRTTPSYVAFTDTERLIGDAAK   | 3366.70 | 3364.69 | 2.01   | 596.89    | 3.E-07 |
| Q13310 | VDEAVAVLQAHHAK                   | 1491.69 | 1486.79 | 4.90   | 3284.88   | 3.E-07 |
| P04264 | SLNNQFASFIDK                     | 1380.77 | 1382.68 | -1.91  | -1381.92  | 3.E-07 |
| P02545 | LESTESRSSFSQHARTSGRVAVEEVDEEGK   | 3316.59 | 3306.57 | 10.02  | 3020.63   | 3.E-07 |
| P02545 | AQNTWGCNLSLRTALINSTGEEVAMRK      | 2979.42 | 2963.43 | 15.99  | 5367.89   | 3.E-07 |
| Q53HU8 | VELQELNDRFANYIDK                 | 1966.99 | 1965.98 | 1.01   | 512.62    | 3.E-07 |
| P16401 | ATGPPVSELITK                     | 1211.55 | 1211.68 | -0.13  | -110.54   | 3.E-07 |
| P31946 | GDYFRYLSEVASGDNK                 | 1819.84 | 1819.84 | 0.00   | -0.81     | 3.E-07 |
| P31946 | GDYFRYLSEVASGDNK                 | 1819.84 | 1819.84 | 0.00   | -0.09     | 3.E-07 |
| P02545 | NIYSEELRETK                      | 1380.69 | 1380.69 | 0.00   | 3.12      | 3.E-07 |

|        |                           |         |         |         |           |        |
|--------|---------------------------|---------|---------|---------|-----------|--------|
| P62906 | KVLCLAVAVGHVK             | 1278.75 | 1392.83 | -114.08 | -89211.60 | 3.E-07 |
| Q15050 | (49)MEGQSVEELLAK          | 1396.81 | 1374.67 | 22.14   | 15847.70  | 3.E-07 |
| Q15050 | (49)MEGQSVEELLAK          | 1391.67 | 1374.67 | 17.00   | 12217.40  | 3.E-07 |
| P11142 | STAGDTHLGGEDFDNRMVNHFAEFK | 2917.36 | 2907.32 | 10.04   | 3442.09   | 3.E-07 |
| P23396 | RFGFPEGSVELYAEK           | 1733.82 | 1727.85 | 5.97    | 3445.94   | 3.E-07 |
| O60506 | VLFRNLANTVTEEILEK         | 2087.16 | 2087.16 | 0.00    | -0.77     | 3.E-07 |
| O60832 | (41)ADAEVILPK             | 1113.65 | 1109.63 | 4.02    | 3607.30   | 3.E-07 |
| O60832 | (41)ADAEVILPK             | 1110.70 | 1109.63 | 1.07    | 962.52    | 3.E-07 |
| P25205 | TIERRYSDLTTLVAFSSSVYPTK   | 2730.42 | 2730.42 | 0.00    | -0.48     | 3.E-07 |
| O60832 | (41)ADAEVILPK             | 1113.65 | 1109.63 | 4.02    | 3607.75   | 3.E-07 |
| O60832 | (41)ADAEVILPK             | 1112.59 | 1109.63 | 2.96    | 2664.46   | 3.E-07 |
| P08758 | TLFGRDLLDDLK              | 1404.76 | 1404.76 | 0.00    | -0.46     | 3.E-07 |
| P02545 | AA YEAE LGDARK            | 1295.68 | 1292.64 | 3.04    | 2348.16   | 3.E-07 |
| P02545 | AA YEAE LGDARK            | 1294.78 | 1292.64 | 2.14    | 1650.06   | 3.E-07 |
| P62917 | LARASGN YATVISHNPETK      | 2029.04 | 2028.04 | 1.00    | 494.11    | 3.E-07 |

|        |                            |         |         |         |           |        |
|--------|----------------------------|---------|---------|---------|-----------|--------|
| P08107 | LLQDFFNGRDLNK              | 1578.82 | 1578.82 | 0.00    | -0.90     | 3.E-07 |
| P04264 | SLNNQFASFIDK               | 1382.68 | 1382.68 | 0.00    | 3.17      | 3.E-07 |
| Q504R3 | NFFWMTDQEAIQDLWQWRK        | 2540.17 | 2541.19 | -1.02   | -402.62   | 4.E-07 |
| O15514 | NRETIASVRSLLLQK            | 1727.01 | 1727.01 | 0.00    | 1.77      | 4.E-07 |
| O15514 | NRETIASVRSLLLQK            | 1726.99 | 1727.01 | -0.02   | -10.33    | 4.E-07 |
| P09661 | NAIANASTLAEVERLK           | 1698.93 | 1698.93 | 0.00    | 0.52      | 4.E-07 |
| Q00839 | PYFPIPEEYTFIQNVPLEDRVRGPK  | 3003.55 | 3003.55 | 0.00    | 0.37      | 4.E-07 |
| P02545 | EAALSTALSEK                | 1118.58 | 1118.58 | 0.00    | -0.35     | 4.E-07 |
| P02545 | EAALSTALSEK                | 1118.55 | 1118.58 | -0.03   | -24.22    | 4.E-07 |
| P09661 | GGPSPGDVEAIK               | 1125.59 | 1125.57 | 0.02    | 18.95     | 4.E-07 |
| P09661 | GGPSPGDVEAIK               | 1125.57 | 1125.57 | 0.00    | 0.21      | 4.E-07 |
| P11142 | NQVAMNPTNTVFDK             | 1657.84 | 1648.79 | 9.05    | 5461.08   | 4.E-07 |
| P14136 | VRFLEQQNK                  | 1160.63 | 1160.63 | 0.00    | 0.52      | 4.E-07 |
| P14136 | VRFLEQQNK                  | 1156.65 | 1160.63 | -3.98   | -3444.87  | 4.E-07 |
| P20700 | QLADETLKVDLENRCQSLTEDLEFRK | 2993.44 | 3262.65 | -269.21 | -89931.90 | 4.E-07 |

|        |                                      |         |         |         |           |        |
|--------|--------------------------------------|---------|---------|---------|-----------|--------|
| P08758 | VLTEIIASRTPEELRAIK                   | 2045.07 | 2038.18 | 6.89    | 3369.72   | 4.E-07 |
| P11940 | QDRITRYQGVNLYVK                      | 1852.00 | 1852.00 | 0.00    | 1.29      | 4.E-07 |
| P28370 | RDFNQFIK                             | 1066.56 | 1066.56 | 0.00    | 1.44      | 4.E-07 |
| P02545 | LESTESRSSFSQHARTSGRVAVEEVDEEGK       | 3306.57 | 3306.57 | 0.00    | 0.33      | 4.E-07 |
| Q08211 | AIEPPPLDAVIEAEHTLRELDALDANDELTPGRLAK | 3990.13 | 4118.19 | -128.06 | -32094.30 | 4.E-07 |
| P02545 | ERARLQLELSK                          | 1346.77 | 1341.77 | 5.00    | 3711.52   | 4.E-07 |
| P02545 | ERARLQLELSK                          | 1346.73 | 1341.77 | 4.96    | 3684.97   | 4.E-07 |
| P02545 | ERARLQLELSK                          | 1341.77 | 1341.77 | 0.00    | -0.39     | 4.E-07 |
| P02545 | ERARLQLELSK                          | 1346.75 | 1341.77 | 4.98    | 3700.95   | 4.E-07 |
| Q14103 | IFVGGLSPDTPPEEK                      | 1487.76 | 1487.75 | 0.01    | 4.08      | 4.E-07 |
| P49736 | RGLALALFGGEPK                        | 1327.76 | 1327.76 | 0.00    | 2.28      | 4.E-07 |
| P28370 | RDFNQFIK                             | 1066.56 | 1066.56 | 0.00    | 1.72      | 4.E-07 |
| P07355 | DIISDTSGDFRK                         | 1353.70 | 1352.66 | 1.04    | 767.32    | 4.E-07 |
| P07355 | DIISDTSGDFRK                         | 1352.66 | 1352.66 | 0.00    | 2.52      | 4.E-07 |
| O43143 | RLQLPVWEYK                           | 1335.69 | 1330.74 | 4.95    | 3708.31   | 4.E-07 |



|        |                         |         |         |         |            |        |
|--------|-------------------------|---------|---------|---------|------------|--------|
| Q9UKD2 | RGVVTLLSDYEVCK          | 1645.07 | 1637.84 | 7.23    | 4392.11    | 4.E-07 |
| O60832 | (41)ADAEVILPK           | 1110.57 | 1109.63 | 0.94    | 846.03     | 5.E-07 |
| P40429 | VFDGIPPPYDK             | 1250.74 | 1246.62 | 4.12    | 3295.75    | 5.E-07 |
| P40429 | VFDGIPPPYDK             | 1250.72 | 1246.62 | 4.10    | 3281.49    | 5.E-07 |
| P40429 | VFDGIPPPYDK             | 1248.69 | 1246.62 | 2.07    | 1658.65    | 5.E-07 |
| Q9Y5B9 | AASITSEVFNK             | 1169.65 | 1165.60 | 4.05    | 3461.91    | 5.E-07 |
| Q9Y5B9 | AASITSEVFNK             | 1165.60 | 1165.60 | 0.00    | 2.07       | 5.E-07 |
| A6NIH7 | SGSNPKAAAAASAAGPGGLVAGK | 1884.00 | 1909.00 | -25.00  | -13269.80  | 5.E-07 |
| P08729 | LEAAIAEAEERGELALK       | 1811.96 | 1811.96 | 0.00    | 2.74       | 5.E-07 |
| P35659 | LLYNRPGTVSSLK           | 1446.82 | 1446.82 | 0.00    | 2.46       | 5.E-07 |
| Q9P0K7 | TALHYAAAQGCLQAVQILCEHK  | 2199.05 | 2481.23 | -282.18 | -128317.00 | 5.E-07 |
| Q96ST3 | SQSIDTPGVISRVSQLFK      | 1837.91 | 1961.06 | -123.15 | -67004.60  | 5.E-07 |
| Q96ST3 | SQSIDTPGVISRVSQLFK      | 1832.97 | 1961.06 | -128.09 | -69882.30  | 5.E-07 |
| P14866 | NPNGPYPYTLK             | 1263.61 | 1262.63 | 0.98    | 778.22     | 5.E-07 |
| P60709 | YPIE(317)HGIVTNWDDMEK   | 1964.87 | 1959.90 | 4.97    | 2527.96    | 5.E-07 |

|        |                                  |         |         |       |          |        |
|--------|----------------------------------|---------|---------|-------|----------|--------|
| P60709 | YPIE(317)HGIVTNWDDMEK            | 1963.89 | 1959.90 | 3.99  | 2030.72  | 5.E-07 |
| Q9UMS4 | TLQLDNNFEVK                      | 1319.67 | 1319.67 | 0.00  | 2.34     | 5.E-07 |
| Q15459 | PLPPAPAPDEYLVSPITGEK             | 2090.10 | 2090.09 | 0.01  | 3.49     | 5.E-07 |
| P06748 | DELHIVEAEAMNYEG(37)SPIK          | 2239.97 | 2223.98 | 15.99 | 7139.77  | 5.E-07 |
| P02545 | EAALSTALSEK                      | 1118.58 | 1118.58 | 0.00  | 0.45     | 5.E-07 |
| P08107 | EIAEAYLGYPVTVNAVITVPAYFNDSQRQATK | 3428.74 | 3428.73 | 0.01  | 1.75     | 5.E-07 |
| P02545 | NIYSEELRETK                      | 1380.69 | 1380.69 | 0.00  | 3.05     | 5.E-07 |
| O43143 | RLQLPVWEYK                       | 1330.74 | 1330.74 | 0.00  | -0.33    | 5.E-07 |
| P16403 | ERSGVSLAALK                      | 1132.66 | 1129.65 | 3.01  | 2657.56  | 5.E-07 |
| P02545 | ERARLQLELSK                      | 1346.72 | 1341.77 | 4.95  | 3673.50  | 5.E-07 |
| P15880 | TYSYLTPDLWK                      | 1385.69 | 1385.69 | 0.00  | 0.79     | 5.E-07 |
| P07355 | TPAQYDASELK                      | 1225.66 | 1221.59 | 4.07  | 3319.35  | 5.E-07 |
| P07355 | TPAQYDASELK                      | 1225.59 | 1221.59 | 4.00  | 3260.88  | 5.E-07 |
| P04264 | SLNNQFASFIDK                     | 1377.81 | 1382.68 | -4.87 | -3536.78 | 5.E-07 |
| P50995 | QRQQILLSFK                       | 1259.73 | 1259.73 | 0.00  | 2.31     | 5.E-07 |

|        |                                |         |         |         |            |        |
|--------|--------------------------------|---------|---------|---------|------------|--------|
| P62241 | YELGRPAANTK                    | 1218.64 | 1218.64 | 0.00    | 0.69       | 5.E-07 |
| P62081 | DVNFEFPEFQL                    | 1383.61 | 1383.63 | -0.02   | -13.41     | 5.E-07 |
| Q03252 | RGLESDVAELRAQLAK               | 1754.96 | 1754.96 | 0.00    | 1.39       | 6.E-07 |
| P02545 | SNEDQSMGNWQIK                  | 1534.81 | 1535.67 | -0.86   | -557.82    | 6.E-07 |
| O60506 | ALLERTGYTLDVTTGQRK             | 2021.09 | 2021.09 | 0.00    | 0.43       | 6.E-07 |
| Q16576 | GEFGGFGSVTGKIECEIK             | 1725.95 | 1913.92 | -187.97 | -108910.00 | 6.E-07 |
| P34931 | VEIANDQGNRTTPSYVAFTDTERLIGDAAK | 3365.70 | 3364.69 | 1.01    | 299.03     | 6.E-07 |
| P62081 | DVNFEFPEFQL                    | 1383.63 | 1383.63 | 0.00    | -1.34      | 6.E-07 |
| O60832 | (41)ADAEVILPK                  | 1109.63 | 1109.63 | 0.00    | 2.68       | 6.E-07 |
| O60832 | (41)ADAEVILPK                  | 1108.69 | 1109.63 | -0.94   | -845.88    | 6.E-07 |
| P07910 | LKGDDLQAIKK                    | 1231.62 | 1227.72 | 3.90    | 3170.00    | 6.E-07 |
| P56182 | VGAEELTADQNLK                  | 1387.69 | 1386.70 | 0.99    | 712.74     | 6.E-07 |
| P56182 | VGAEELTADQNLK                  | 1386.70 | 1386.70 | 0.00    | 2.92       | 6.E-07 |
| P02545 | ERARLQLELSK                    | 1341.77 | 1341.77 | 0.00    | 0.20       | 6.E-07 |
| P16403 | ERSGVSLAALK                    | 1130.63 | 1129.65 | 0.98    | 868.64     | 6.E-07 |

|        |                           |         |         |       |         |        |
|--------|---------------------------|---------|---------|-------|---------|--------|
| P11142 | STAGDTHLGGEDFDNRMVNHFAEFK | 2907.58 | 2907.32 | 0.26  | 88.34   | 6.E-07 |
| P40429 | VFDGIPPPYDK               | 1246.62 | 1246.62 | 0.00  | 1.32    | 6.E-07 |
| P40429 | VFDGIPPPYDK               | 1245.73 | 1246.62 | -0.89 | -718.10 | 6.E-07 |
| P02545 | SNEDQSMGNWQIK             | 1535.67 | 1535.67 | 0.00  | 0.29    | 6.E-07 |
| P62241 | YELGRPAANTK               | 1219.63 | 1218.64 | 0.99  | 815.77  | 7.E-07 |
| P62241 | YELGRPAANTK               | 1218.64 | 1218.64 | 0.00  | 1.83    | 7.E-07 |
| Q4F966 | GDGEVLEEIVTK              | 1292.72 | 1287.66 | 5.06  | 3917.57 | 7.E-07 |
| P02545 | NIYSEELRETK               | 1381.67 | 1380.69 | 0.98  | 711.39  | 7.E-07 |
| P02545 | NIYSEELRETK               | 1380.71 | 1380.69 | 0.02  | 18.04   | 7.E-07 |
| P02545 | NIYSEELRETK               | 1380.69 | 1380.69 | 0.00  | -0.72   | 7.E-07 |
| P14136 | VRFLEQQNK                 | 1160.63 | 1160.63 | 0.00  | 2.16    | 7.E-07 |
| O75367 | GVTIASGGVLPNIHPELLAK      | 1985.13 | 1985.13 | 0.00  | -0.10   | 7.E-07 |
| P78346 | (41)AVFADLDLRAGSDLK       | 1631.85 | 1631.85 | 0.00  | -1.09   | 7.E-07 |
| Q9NQ4  | EARAVLTFALDSVERK          | 1803.98 | 1803.98 | 0.00  | 0.36    | 7.E-07 |
| P62988 | ESTLHLVLRRLGG             | 1449.84 | 1449.84 | 0.00  | 0.92    | 7.E-07 |

|        |                  |         |         |        |           |        |
|--------|------------------|---------|---------|--------|-----------|--------|
| P16401 | ATGPPVSELITK     | 1211.68 | 1211.68 | 0.00   | -0.10     | 7.E-07 |
| P16401 | ATGPPVSELITK     | 1211.65 | 1211.68 | -0.03  | -23.05    | 7.E-07 |
| P16401 | ATGPPVSELITK     | 1211.54 | 1211.68 | -0.14  | -111.45   | 7.E-07 |
| P02545 | ERARLQLELSK      | 1346.75 | 1341.77 | 4.98   | 3699.61   | 8.E-07 |
| P02545 | ERARLQLELSK      | 1346.72 | 1341.77 | 4.95   | 3672.91   | 8.E-07 |
| P15880 | TYSYLTPDLWK      | 1385.69 | 1385.69 | 0.00   | 1.08      | 8.E-07 |
| P62081 | DVNFEFPEFQL      | 1383.63 | 1383.63 | 0.00   | -1.34     | 8.E-07 |
| P62081 | DVNFEFPEFQL      | 1383.61 | 1383.63 | -0.02  | -13.41    | 8.E-07 |
| P16403 | ERSGVSLAALK      | 1129.65 | 1129.65 | 0.00   | -0.26     | 8.E-07 |
| P16403 | ERSGVSLAALK      | 1129.64 | 1129.65 | -0.01  | -11.33    | 8.E-07 |
| P16403 | ERSGVSLAALK      | 1127.63 | 1129.65 | -2.02  | -1795.55  | 8.E-07 |
| P07355 | TPAQYDASELK      | 1222.71 | 1221.59 | 1.12   | 913.05    | 8.E-07 |
| Q9UMS4 | TLQLDNNFEVK      | 1322.61 | 1319.67 | 2.94   | 2226.11   | 8.E-07 |
| P26447 | ELLTRELPSFLGK    | 1483.84 | 1501.85 | -18.01 | -12137.20 | 8.E-07 |
| P06396 | HVVPNEVVVQRLFQVK | 1890.08 | 1890.08 | 0.00   | 0.15      | 8.E-07 |

|        |                                  |         |         |        |           |        |
|--------|----------------------------------|---------|---------|--------|-----------|--------|
| P60709 | QEYDESGPSIVHRK                   | 1626.77 | 1643.79 | -17.02 | -10463.40 | 8.E-07 |
| P69905 | LRVDPVNFK                        | 1090.69 | 1086.62 | 4.07   | 3730.53   | 8.E-07 |
| P08758 | PSRLYDAYELK                      | 1353.69 | 1353.69 | 0.00   | 0.56      | 8.E-07 |
| P08758 | PSRLYDAYELK                      | 1352.77 | 1353.69 | -0.92  | -677.23   | 8.E-07 |
| P07355 | KELASALKSALSGHLETVILGLLK         | 2483.39 | 2490.48 | -7.09  | -2856.72  | 8.E-07 |
| P07910 | LKGDDLQAIKK                      | 1227.72 | 1227.72 | 0.00   | 0.36      | 9.E-07 |
| Q9NWH9 | (41)AAATGAVAASAASGQAEGK          | 1630.81 | 1629.80 | 1.01   | 618.76    | 9.E-07 |
| Q15050 | VSTASVGRFQERLPK                  | 1680.02 | 1673.92 | 6.10   | 3631.99   | 9.E-07 |
| P16401 | ATGPPVSELITK                     | 1212.68 | 1211.68 | 1.00   | 827.57    | 9.E-07 |
| P02545 | ERARLQLELSK                      | 1342.79 | 1341.77 | 1.02   | 756.24    | 9.E-07 |
| Q8WYN9 | (49)MIPPDQQLIFAGK                | 1649.89 | 1654.89 | -5.00  | -3027.90  | 9.E-07 |
| P08107 | SENVQDLLLLDVAPLSLGLLETAGGVMTALIK | 3179.73 | 3179.74 | -0.01  | -1.90     | 9.E-07 |
| P11142 | DAGTIAGLNVLRIINEPTAAAIAYGLDK     | 2839.54 | 2839.54 | 0.00   | -0.59     | 9.E-07 |
| P11142 | DAGTIAGLNVLRIINEPTAAAIAYGLDK     | 2836.41 | 2839.54 | -3.13  | -1101.81  | 9.E-07 |
| Q8TDN6 | TLLPHDPTADVFTPAEEK               | 2079.06 | 2079.05 | 0.01   | 2.65      | 9.E-07 |

|        |                             |         |         |         |            |        |
|--------|-----------------------------|---------|---------|---------|------------|--------|
| P08107 | NQVALNPQNTVFDAK             | 1657.84 | 1657.84 | 0.00    | -0.34      | 9.E-07 |
| P08107 | NQVALNPQNTVFDAK             | 1653.85 | 1657.84 | -3.99   | -2410.83   | 9.E-07 |
| P20700 | VDLENRCQSLTEDLEFRK          | 2259.14 | 2251.09 | 8.05    | 3562.30    | 1.E-06 |
| Q9NPD3 | (41)AGLELLSDQGYRVDGRRAGELRK | 2600.38 | 2600.38 | 0.00    | -0.34      | 1.E-06 |
| Q9UMS4 | TLQLDNNFEVK                 | 1319.67 | 1319.67 | 0.00    | 2.64       | 1.E-06 |
| P13010 | FSEEQRFNNFLK                | 1557.76 | 1557.76 | 0.00    | 0.59       | 1.E-06 |
| Q03252 | LELEQTYQAK                  | 1222.63 | 1221.62 | 1.01    | 823.06     | 1.E-06 |
| P07355 | KELASALKSALS GHLETVILGLLK   | 2483.39 | 2490.48 | -7.09   | -2856.16   | 1.E-06 |
| P16401 | ATGPPVSELITK                | 1216.61 | 1211.68 | 4.93    | 4054.28    | 1.E-06 |
| P16401 | ATGPPVSELITK                | 1215.63 | 1211.68 | 3.95    | 3248.51    | 1.E-06 |
| P16401 | ATGPPVSELITK                | 1211.55 | 1211.68 | -0.13   | -111.37    | 1.E-06 |
| P69905 | LRVDPVNFK                   | 1087.61 | 1086.62 | 0.99    | 911.58     | 1.E-06 |
| P69905 | LRVDPVNFK                   | 1086.62 | 1086.62 | 0.00    | 0.50       | 1.E-06 |
| Q9BW83 | LAACILAGDPAVGK              | 1203.63 | 1482.82 | -279.19 | -231956.00 | 1.E-06 |
| Q9BW83 | LAACILAGDPAVGK              | 1198.63 | 1482.82 | -284.19 | -237092.00 | 1.E-06 |

|        |                               |         |         |        |          |        |
|--------|-------------------------------|---------|---------|--------|----------|--------|
| P02545 | ERARLQLELSK                   | 1342.77 | 1341.77 | 1.00   | 747.91   | 1.E-06 |
| P02545 | ERARLQLELSK                   | 1342.77 | 1341.77 | 1.00   | 747.54   | 1.E-06 |
| P50995 | QRQKILLSFK                    | 1259.73 | 1259.73 | 0.00   | 1.99     | 1.E-06 |
| Q59EM9 | QLENGRTLSDYNIQK               | 1761.86 | 1777.90 | -16.04 | -9105.16 | 1.E-06 |
| P61247 | APAMFNIRNIGK                  | 1334.69 | 1330.72 | 3.97   | 2973.84  | 1.E-06 |
| P61247 | APAMFNIRNIGK                  | 1334.67 | 1330.72 | 3.95   | 2958.15  | 1.E-06 |
| P07305 | GVGASGSFRLAK                  | 1155.70 | 1148.63 | 7.07   | 6116.24  | 1.E-06 |
| P60709 | IWHHTFYNELRVAPEEHPVLLTEAPLNPK | 3449.80 | 3449.79 | 0.01   | 2.09     | 1.E-06 |
| P60709 | IWHHTFYNELRVAPEEHPVLLTEAPLNPK | 3449.80 | 3449.79 | 0.01   | 3.60     | 1.E-06 |
| Q15424 | EESSELEQPFQDTSSVGPDRK         | 2435.11 | 2435.11 | 0.00   | 1.27     | 1.E-06 |
| Q562R8 | LRVAPEEHPVLLTEAPLNPK          | 2351.29 | 2222.24 | 129.05 | 54885.50 | 1.E-06 |
| P62701 | LTGVFAPRPSTGPHK               | 1566.86 | 1563.85 | 3.01   | 1920.64  | 1.E-06 |
| Q562R8 | LRVAPEEHPVLLTEAPLNPK          | 2333.28 | 2222.24 | 111.04 | 47588.90 | 1.E-06 |
| P16401 | ATGPPVSELITK                  | 1215.63 | 1211.68 | 3.95   | 3248.27  | 1.E-06 |
| P46781 | TYVTPRRPF EK                  | 1393.73 | 1392.75 | 0.98   | 704.54   | 1.E-06 |



|        |                             |         |         |         |           |        |
|--------|-----------------------------|---------|---------|---------|-----------|--------|
| P17676 | APPTACYAGAAPAPSQVK          | 1769.88 | 1755.86 | 14.02   | 7922.57   | 1.E-06 |
| Q96ST2 | ILQELPSVSQETLK              | 1583.88 | 1583.88 | 0.00    | 1.13      | 1.E-06 |
| Q09028 | IGEEQSPEDAEDGPPELLFIHGGHTAK | 2872.36 | 2872.35 | 0.01    | 3.64      | 1.E-06 |
| P62701 | DANGNSFATRLSNIFVIGK         | 2024.03 | 2023.05 | 0.98    | 486.03    | 1.E-06 |
| P05388 | RVLALSVETDYTFPLAEK          | 2051.09 | 2051.09 | 0.00    | 0.94      | 1.E-06 |
| P05388 | RVLALSVETDYTFPLAEK          | 2050.19 | 2051.09 | -0.90   | -437.11   | 1.E-06 |
| P14866 | NDQDTWDYTNPNLSGQGDPGSPNK    | 2733.15 | 2733.15 | 0.00    | 0.16      | 1.E-06 |
| P33992 | SDASPSSIRSLK                | 1246.65 | 1246.65 | 0.00    | 0.87      | 1.E-06 |
| P49756 | KLPVDSVFNK                  | 1145.64 | 1145.64 | 0.00    | 1.54      | 1.E-06 |
| P02545 | ERARLQLELSK                 | 1341.77 | 1341.77 | 0.00    | -0.32     | 1.E-06 |
| P02545 | ERARLQLELSK                 | 1339.79 | 1341.77 | -1.98   | -1476.07  | 1.E-06 |
| Q9H0S4 | IQIEAIPALQGRDIIGLAETGSGK    | 2565.17 | 2562.44 | 2.73    | 1064.56   | 1.E-06 |
| P02545 | QREFESRLADALQELRAQHEDQVEQYK | 3187.52 | 3315.62 | -128.10 | -40188.10 | 1.E-06 |
| Q9UQE7 | MNLPGEVTFPLPNK              | 1587.84 | 1571.84 | 16.00   | 10076.10  | 1.E-06 |
| P15880 | TYSYLTPDLWK                 | 1382.81 | 1385.69 | -2.88   | -2084.25  | 1.E-06 |

|        |                            |         |         |         |            |        |
|--------|----------------------------|---------|---------|---------|------------|--------|
| P46781 | TYVTPRRPF EK               | 1392.75 | 1392.75 | 0.00    | 0.67       | 2.E-06 |
| P62753 | LIEVDDERK                  | 1120.58 | 1115.58 | 5.00    | 4457.77    | 2.E-06 |
| P62753 | LIEVDDERK                  | 1118.66 | 1115.58 | 3.08    | 2757.55    | 2.E-06 |
| Q96ST2 | ILQELPSVSQETLK             | 1585.89 | 1583.88 | 2.01    | 1266.35    | 2.E-06 |
| P62701 | GRFAVHRITPEEAK             | 1609.87 | 1609.87 | 0.00    | 0.91       | 2.E-06 |
| Q08211 | YPSPFFVFGEK                | 1316.64 | 1316.64 | 0.00    | 1.37       | 2.E-06 |
| Q04695 | EPVTTRQVRTIVEEVQDGK        | 2183.16 | 2183.15 | 0.01    | 3.49       | 2.E-06 |
| P07355 | DIISDTSGDFRK               | 1352.66 | 1352.66 | 0.00    | 0.82       | 2.E-06 |
| Q9BZJ0 | NRTVISNWIK                 | 1229.69 | 1229.69 | 0.00    | 1.59       | 2.E-06 |
| Q53G20 | GTAAAAAAAAAAAAAK           | 1085.58 | 1227.66 | -142.07 | -130875.00 | 2.E-06 |
| Q53G20 | GTAAAAAAAAAAAAAK           | 1085.56 | 1227.66 | -142.10 | -130900.00 | 2.E-06 |
| P42166 | YGVNPGPIVGTTTRK            | 1462.75 | 1457.80 | 4.95    | 3384.15    | 2.E-06 |
| P42166 | YGVNPGPIVGTTTRK            | 1457.80 | 1457.80 | 0.00    | 2.93       | 2.E-06 |
| Q96JB1 | LVQLYETSLVRHGLMTLGPSSGSK   | 2445.22 | 2542.36 | -97.14  | -39727.80  | 2.E-06 |
| P52597 | HSGPNSADSANDGFVRLRGLPFGCTK | 2759.33 | 2759.32 | 0.01    | 3.06       | 2.E-06 |

|        |                                                                         |         |         |         |           |        |
|--------|-------------------------------------------------------------------------|---------|---------|---------|-----------|--------|
| P06748 | VDNDENEHQLSLRTVSLGAGAK                                                  | 2488.17 | 2352.17 | 136.00  | 54658.70  | 2.E-06 |
| P06748 | VDNDENEHQLSLRTVSLGAGAK                                                  | 2480.27 | 2352.17 | 128.10  | 51646.10  | 2.E-06 |
| P62701 | LTGVFAPRPSTGPHK                                                         | 1563.85 | 1563.85 | 0.00    | 0.56      | 2.E-06 |
| P62753 | LIEVDDERK                                                               | 1115.58 | 1115.58 | 0.00    | 0.78      | 2.E-06 |
| P62753 | LIEVDDERK                                                               | 1111.63 | 1115.58 | -3.95   | -3550.29  | 2.E-06 |
| P61981 | GDYYRYLAEVATGEK                                                         | 1733.83 | 1733.83 | 0.00    | 0.50      | 2.E-06 |
| P36578 | (41)ACARPLISVYSEK                                                       | 1421.69 | 1534.78 | -113.09 | -79547.30 | 2.E-06 |
| Q9H0S4 | IQIEAIPALQGRDIIGLAETGSGK                                                | 2562.45 | 2562.44 | 0.01    | 2.95      | 2.E-06 |
| Q14566 | VIHRLTHYDHVLIELTQAGLK                                                   | 2455.37 | 2455.37 | 0.00    | 0.20      | 2.E-06 |
| O75367 | NGPLEVAGAAVSAGHGLPAK                                                    | 1814.96 | 1814.96 | 0.00    | 0.70      | 2.E-06 |
| P08758 | PSRLYDAYELK                                                             | 1353.69 | 1353.69 | 0.00    | 0.11      | 2.E-06 |
| P61978 | IILDLISESPIK                                                            | 1339.80 | 1339.80 | 0.00    | 0.05      | 2.E-06 |
| Q8IY81 | HRILDPEGLALGAVIASSKKAKRDLIDN(37)SFNRYTFNEDEG<br>ELPEWVFVQEEKQHRIRQLPVGK | 7295.90 | 7266.72 | 29.18   | 3999.66   | 2.E-06 |
| Q562R8 | LRVAPEEHPVLLTEAPLNPK                                                    | 2333.28 | 2222.24 | 111.04  | 47588.90  | 2.E-06 |
| P11021 | ELEEIVQPIISK                                                            | 1400.88 | 1396.78 | 4.10    | 2927.93   | 2.E-06 |

|        |                                 |         |         |         |            |        |
|--------|---------------------------------|---------|---------|---------|------------|--------|
| P11021 | ELEEIVQPIISK                    | 1400.81 | 1396.78 | 4.03    | 2873.98    | 2.E-06 |
| P11021 | ELEEIVQPIISK                    | 1399.85 | 1396.78 | 3.07    | 2192.87    | 2.E-06 |
| Q9UQE7 | ILMEFNKMNLPGVTFPLPLNK           | 2377.18 | 2447.30 | -70.12  | -29495.60  | 2.E-06 |
| P46778 | EPELLEPIPYEFMA                  | 1696.90 | 1676.80 | 20.10   | 11845.00   | 2.E-06 |
| P46778 | EPELLEPIPYEFMA                  | 1692.80 | 1676.80 | 16.00   | 9449.61    | 2.E-06 |
| P46778 | EPELLEPIPYEFMA                  | 1692.77 | 1676.80 | 15.97   | 9431.65    | 2.E-06 |
| A6NGW7 | LVVDFSATWCGPCKMIK               | 1775.82 | 2010.97 | -235.15 | -132415.00 | 2.E-06 |
| P05783 | IMADIRAQYDELARK                 | 1791.93 | 1791.93 | 0.00    | 2.27       | 2.E-06 |
| Q8NI36 | VVNLGVLAQK                      | 1044.59 | 1039.64 | 4.95    | 4742.94    | 2.E-06 |
| Q04695 | TRLEQEIATYRRLEGEDAHLTQYK        | 3032.58 | 3032.57 | 0.01    | 2.57       | 2.E-06 |
| O43395 | TGIHTSTRLLALIAPK                | 1579.80 | 1577.93 | 1.87    | 1186.48    | 2.E-06 |
| P22626 | REKEQFRKLFIGGLSFETTEESLRNYEQWGK | 3842.05 | 3967.99 | -125.94 | -32778.60  | 2.E-06 |
| P61978 | IILDLISESPIK                    | 1340.74 | 1339.80 | 0.94    | 701.23     | 2.E-06 |
| P61247 | APAMFNIRNIGK                    | 1330.72 | 1330.72 | 0.00    | 1.09       | 2.E-06 |
| P61247 | LMELHGEQSSSGK                   | 1330.66 | 1330.62 | 0.04    | 31.12      | 2.E-06 |

|        |                     |         |         |         |           |        |
|--------|---------------------|---------|---------|---------|-----------|--------|
| P61247 | LMELHGEGSSSGK       | 1330.62 | 1330.62 | 0.00    | 1.21      | 2.E-06 |
| P02545 | ERARLQLELSK         | 1341.77 | 1341.77 | 0.00    | -0.02     | 2.E-06 |
| P36578 | (41)ACARPLISVYSEK   | 1424.74 | 1534.78 | -110.04 | -77232.60 | 2.E-06 |
| P36578 | (41)ACARPLISVYSEK   | 1422.78 | 1534.78 | -112.00 | -78715.30 | 2.E-06 |
| P08758 | PSRLYDAYELK         | 1353.69 | 1353.69 | 0.00    | 0.41      | 2.E-06 |
| P08758 | PSRLYDAYELK         | 1352.77 | 1353.69 | -0.92   | -677.16   | 2.E-06 |
| Q04695 | EPVTTRQVRTIVEEVQDGK | 2183.16 | 2183.15 | 0.01    | 2.94      | 2.E-06 |
| P42766 | SIARVLTVINQTQK      | 1569.93 | 1569.92 | 0.01    | 9.41      | 2.E-06 |
| P02545 | DLEALLNSK           | 1003.61 | 1001.54 | 2.07    | 2067.42   | 2.E-06 |
| P61978 | IILDLISESPIK        | 1339.78 | 1339.80 | -0.02   | -13.01    | 2.E-06 |
| P61978 | IILDLISESPIK        | 1339.77 | 1339.80 | -0.03   | -21.97    | 2.E-06 |
| P22626 | RAVAREESGKPGAHVTVK  | 1891.04 | 1891.04 | 0.00    | 0.93      | 3.E-06 |
| P20700 | DAALATALGDKK        | 1172.64 | 1172.64 | 0.00    | -0.14     | 3.E-06 |
| Q8NC51 | EGIRRVGRRPDQQLQGEGK | 2178.18 | 2178.17 | 0.01    | 2.68      | 3.E-06 |
| A6NJC9 | STYQEFTDHLVK        | 1469.76 | 1466.70 | 3.06    | 2079.97   | 3.E-06 |

|        |                         |         |         |         |            |        |
|--------|-------------------------|---------|---------|---------|------------|--------|
| P15880 | TYSYLTPLDLWK            | 1385.69 | 1385.69 | 0.00    | 0.43       | 3.E-06 |
| Q08211 | YPSFFVFG EK             | 1316.64 | 1316.64 | 0.00    | 2.28       | 3.E-06 |
| Q13838 | KNCPHIVGTPGRILALARNK    | 2199.24 | 2313.32 | -114.08 | -51871.90  | 3.E-06 |
| P19338 | GLSEDTEETLK             | 1321.62 | 1321.62 | 0.00    | 1.30       | 3.E-06 |
| P11021 | ELEEIVQPIISK            | 1396.78 | 1396.78 | 0.00    | 0.42       | 3.E-06 |
| P32969 | GVTLGFRYK               | 1039.58 | 1039.58 | 0.00    | 1.11       | 3.E-06 |
| P32969 | GVTLGFRYK               | 1039.57 | 1039.58 | -0.01   | -9.37      | 3.E-06 |
| P62753 | GYVVRISGGNDK            | 1264.73 | 1263.66 | 1.07    | 844.59     | 3.E-06 |
| P62753 | GYVVRISGGNDK            | 1263.66 | 1263.66 | 0.00    | 0.69       | 3.E-06 |
| P05388 | TSFFQALGITTK            | 1312.70 | 1312.70 | 0.00    | 1.84       | 3.E-06 |
| O60506 | EFNEDGALAVLQQFK         | 1707.85 | 1707.85 | 0.00    | -0.10      | 3.E-06 |
| O43390 | LCDSYEIRPGK             | 1336.64 | 1336.64 | 0.00    | 0.29       | 3.E-06 |
| Q53G20 | GTAAAAAAAAAAAAAK        | 1085.59 | 1227.66 | -142.07 | -130873.00 | 3.E-06 |
| P20700 | ALYETELADARRALDDTARERAK | 2633.35 | 2633.35 | 0.00    | 0.50       | 3.E-06 |
| P46778 | RINVRIEHIK              | 1276.77 | 1276.77 | 0.00    | 0.89       | 3.E-06 |

|        |                                    |         |         |         |            |        |
|--------|------------------------------------|---------|---------|---------|------------|--------|
| P09874 | VFSATLGLVDIVK                      | 1360.80 | 1360.80 | 0.00    | 0.83       | 3.E-06 |
| P07355 | AYTNFDAERDALNIETAIKTK              | 2453.28 | 2383.20 | 70.08   | 28564.40   | 3.E-06 |
| Q562R8 | LRVAPEEHPVLLTEAPLNPK               | 2351.29 | 2222.24 | 129.05  | 54884.90   | 3.E-06 |
| P62906 | KVLCLAVAVGHVK                      | 1278.75 | 1392.83 | -114.08 | -89211.70  | 3.E-06 |
| Q6PJT7 | LRSVTTEPSSLK                       | 1321.63 | 1316.73 | 4.90    | 3704.93    | 3.E-06 |
| P14866 | NRIQHPSNVLHFFNAPLEVTEENFFEICDELGVK | 4041.96 | 4041.97 | -0.01   | -3.18      | 3.E-06 |
| P05787 | TEISEMNRNISRLQAEIEGLK              | 2435.23 | 2430.25 | 4.98    | 2044.55    | 3.E-06 |
| P20700 | EELRELNDRLAVYIDK                   | 1975.04 | 1975.04 | 0.00    | 0.19       | 3.E-06 |
| Q9ULV4 | NADPILISLK                         | 1082.63 | 1082.63 | 0.00    | 3.66       | 3.E-06 |
| Q9UPQ0 | GSLTEGALAHSGNPVSK                  | 1629.80 | 1623.82 | 5.98    | 3668.42    | 3.E-06 |
| P61353 | NIDDGTSDRPYSHALVAGIDRYPRK          | 2819.45 | 2815.40 | 4.05    | 1435.35    | 3.E-06 |
| P05787 | LSELEAALQRAK                       | 1204.67 | 1327.75 | -123.08 | -102166.00 | 3.E-06 |
| P05787 | LSELEAALQRAK                       | 1200.52 | 1327.75 | -127.24 | -105984.00 | 3.E-06 |
| P05787 | LSELEAALQRAK                       | 1199.66 | 1327.75 | -128.09 | -106774.00 | 3.E-06 |
| P62424 | VPPAINQFTQALDRQTATQLLK             | 2452.34 | 2452.34 | 0.00    | 1.48       | 3.E-06 |

|        |                       |         |         |       |          |        |
|--------|-----------------------|---------|---------|-------|----------|--------|
| O43395 | TGIHTSTRLALIAPK       | 1577.93 | 1577.93 | 0.00  | 0.51     | 4.E-06 |
| P15880 | SLEEIYLFSLPIK         | 1551.87 | 1550.86 | 1.01  | 648.40   | 4.E-06 |
| P02545 | NIYSEELRETK           | 1381.67 | 1380.69 | 0.98  | 711.24   | 4.E-06 |
| P02545 | NIYSEELRETK           | 1380.71 | 1380.69 | 0.02  | 18.04    | 4.E-06 |
| P02545 | NIYSEELRETK           | 1380.69 | 1380.69 | 0.00  | -0.79    | 4.E-06 |
| Q15050 | VSTASVGRFQERLPK       | 1674.93 | 1673.92 | 1.01  | 601.53   | 4.E-06 |
| Q13435 | PLYGDVFGTNAAEFQTK     | 1854.98 | 1856.89 | -1.91 | -1027.31 | 4.E-06 |
| P20700 | EELRELNDR LAVYIDK     | 1975.04 | 1975.04 | 0.00  | 1.11     | 4.E-06 |
| P27635 | IRIFDLGRKK            | 1244.77 | 1244.77 | 0.00  | 0.41     | 4.E-06 |
| P63261 | (44)EEEIAALVIDNGSGMCK | 1907.85 | 1876.85 | 31.00 | 16247.60 | 4.E-06 |
| P63261 | (44)EEEIAALVIDNGSGMCK | 1907.81 | 1876.85 | 30.96 | 16228.50 | 4.E-06 |
| P05783 | IMADIRAQYDELARK       | 1791.93 | 1791.93 | 0.00  | 2.39     | 4.E-06 |
| P46781 | MKLDYILGLK            | 1209.69 | 1192.69 | 17.00 | 14052.10 | 4.E-06 |
| P20700 | SLEGDLEDLK            | 1117.55 | 1117.55 | 0.00  | 2.46     | 4.E-06 |
| P20700 | SLEGDLEDLK            | 1116.62 | 1117.55 | -0.93 | -835.52  | 4.E-06 |



|        |                           |         |         |         |           |        |
|--------|---------------------------|---------|---------|---------|-----------|--------|
| Q9UQE7 | AELGTDLLSQLSLEDQK         | 1858.96 | 1858.95 | 0.01    | 2.82      | 4.E-06 |
| P36578 | ACARPLISVYSEK             | 1443.77 | 1492.77 | -49.00  | -33936.20 | 4.E-06 |
| P36578 | ACARPLISVYSEK             | 1443.75 | 1492.77 | -49.02  | -33951.90 | 4.E-06 |
| P13645 | VTMQNLNDRLASYLDK          | 1867.92 | 1879.95 | -12.03  | -6441.40  | 4.E-06 |
| O60506 | LDEIYVAGLVAHSDLDERAIEALK  | 2641.43 | 2639.38 | 2.05    | 775.57    | 4.E-06 |
| P20700 | DAALATALGDKK              | 1172.64 | 1172.64 | 0.00    | 1.74      | 4.E-06 |
| Q9GZL7 | APLYDLAAHEDK              | 1352.66 | 1341.66 | 11.00   | 8134.90   | 4.E-06 |
| P26373 | STESLQANVQRLK             | 1344.70 | 1472.79 | -128.09 | -95258.00 | 5.E-06 |
| P61353 | NIDDGTSRDPYSHALVAGIDRYPRK | 2815.40 | 2815.40 | 0.00    | 1.45      | 5.E-06 |
| P04083 | QAWFIENEEQEYVQTVK         | 2140.02 | 2140.01 | 0.01    | 3.42      | 5.E-06 |
| Q9NQG5 | IASLPQEVQDVSLLK           | 1770.86 | 1767.96 | 2.90    | 1636.10   | 5.E-06 |
| Q9Y5B9 | DLYIRPNIAQK               | 1329.74 | 1329.74 | 0.00    | 3.18      | 5.E-06 |
| P05787 | TEISEMNRNISRLQAEIEGLK     | 2430.25 | 2430.25 | 0.00    | 0.85      | 5.E-06 |
| P02545 | DLEALLNSK                 | 1001.54 | 1001.54 | 0.00    | 0.00      | 5.E-06 |
| Q9H081 | QALLAELEEQK               | 1271.69 | 1270.68 | 1.01    | 790.41    | 5.E-06 |

|        |                                         |         |         |         |            |        |
|--------|-----------------------------------------|---------|---------|---------|------------|--------|
| Q8WWM7 | EPGRTLEPQELARIAGK                       | 1873.03 | 1864.02 | 9.01    | 4807.78    | 5.E-06 |
| Q09028 | IGEEQSPEDAEDGPELLFIHGGHTAK              | 2872.36 | 2872.35 | 0.01    | 2.28       | 5.E-06 |
| P07355 | PLYFADRLYDSMK                           | 1633.79 | 1617.79 | 16.00   | 9792.30    | 5.E-06 |
| Q9UHA3 | QNIHLIRAPLAGK                           | 1429.85 | 1429.85 | 0.00    | 0.12       | 5.E-06 |
| P61247 | FELGKLMELHGEGSSSGK                      | 2028.04 | 1904.93 | 123.11  | 60703.70   | 5.E-06 |
| Q9P0K7 | TALHYAAAQGLQAVQILCEHK                   | 2200.22 | 2481.23 | -281.01 | -127722.00 | 6.E-06 |
| P06748 | MSVQPTVSLGGFEITPPVVRLK                  | 2486.19 | 2467.39 | 18.80   | 7561.70    | 6.E-06 |
| P06748 | MSVQPTVSLGGFEITPPVVRLK                  | 2483.39 | 2467.39 | 16.00   | 6444.01    | 6.E-06 |
| P06748 | MSVQPTVSLGGFEITPPVVRLK                  | 2479.32 | 2467.39 | 11.93   | 4810.32    | 6.E-06 |
| P15880 | EVATAIRGAILAK                           | 1424.87 | 1424.87 | 0.00    | 1.22       | 6.E-06 |
| Q53G20 | GTAAAAAAAAAAAAAK                        | 1085.59 | 1227.66 | -142.07 | -130873.00 | 6.E-06 |
| Q53G20 | GTAAAAAAAAAAAAAK                        | 1085.59 | 1227.66 | -142.07 | -130873.00 | 6.E-06 |
| Q53G20 | GTAAAAAAAAAAAAAK                        | 1085.56 | 1227.66 | -142.10 | -130899.00 | 6.E-06 |
| Q53G20 | GTAAAAAAAAAAAAAK                        | 1085.56 | 1227.66 | -142.10 | -130900.00 | 6.E-06 |
| Q9H2P0 | RTYEQMEFPLKKRKLDDSDSPSFFEEKPEEPVVLALDPK | 4872.36 | 4865.45 | 6.91    | 1417.27    | 6.E-06 |

|        |                       |         |         |         |           |        |
|--------|-----------------------|---------|---------|---------|-----------|--------|
| P19338 | VEGTEPTTAFNLFVGNLNFNK | 2311.16 | 2311.15 | 0.01    | 2.24      | 6.E-06 |
| P08758 | VLTEIIASRTPEELRAIK    | 2038.18 | 2038.18 | 0.00    | 0.54      | 6.E-06 |
| Q08211 | GMTLVTPQLLLLFASK      | 1747.00 | 1731.00 | 16.00   | 9156.61   | 6.E-06 |
| P02545 | ERARLQLELSK           | 1341.77 | 1341.77 | 0.00    | -0.09     | 6.E-06 |
| P04083 | QAWFIENEEQEYVQTVK     | 2122.99 | 2140.01 | -17.02  | -8015.93  | 6.E-06 |
| O60812 | VDSLLENLEK            | 1162.69 | 1158.61 | 4.08    | 3508.67   | 7.E-06 |
| P20700 | EELRELNDR LAVYIDK     | 1975.04 | 1975.04 | 0.00    | 1.31      | 7.E-06 |
| O75526 | SRGFVTFESPADAK        | 1728.86 | 1728.85 | 0.01    | 3.24      | 7.E-06 |
| P36578 | (41)ACARPLISVYSEK     | 1424.74 | 1534.78 | -110.04 | -77232.60 | 7.E-06 |
| P36578 | (41)ACARPLISVYSEK     | 1422.78 | 1534.78 | -112.00 | -78715.20 | 7.E-06 |
| P36578 | (41)ACARPLISVYSEK     | 1421.69 | 1534.78 | -113.09 | -79547.30 | 7.E-06 |
| O75400 | EPAFEDITLESERK        | 1662.81 | 1662.81 | 0.00    | 1.66      | 7.E-06 |
| P43243 | LCSLFYTNEEVAK         | 1572.75 | 1572.75 | 0.00    | 1.22      | 7.E-06 |
| P43243 | LCSLFYTNEEVAK         | 1569.79 | 1572.75 | -2.96   | -1885.84  | 7.E-06 |
| P07355 | PLYFADRLYDSMKGKTRDK   | 2454.28 | 2360.19 | 94.09   | 38336.80  | 7.E-06 |

|        |                     |         |         |        |           |        |
|--------|---------------------|---------|---------|--------|-----------|--------|
| Q04695 | EPVTTRQVRTIVEEVQDGK | 2183.16 | 2183.15 | 0.01   | 3.08      | 8.E-06 |
| P61247 | VERADGYEPPVQESV     | 1673.79 | 1673.79 | 0.00   | 0.87      | 8.E-06 |
| P20700 | DAALATALGDKK        | 1176.61 | 1172.64 | 3.97   | 3372.94   | 8.E-06 |
| P20700 | DAALATALGDKK        | 1175.64 | 1172.64 | 3.00   | 2554.97   | 8.E-06 |
| P20700 | DAALATALGDKK        | 1172.64 | 1172.64 | 0.00   | 1.99      | 8.E-06 |
| A6NJC9 | STYQEFTDHLVK        | 1469.76 | 1466.70 | 3.06   | 2079.70   | 8.E-06 |
| O43818 | LYLEQLRQQEEEK       | 1704.88 | 1704.87 | 0.01   | 4.43      | 8.E-06 |
| P02545 | ERARLQLELSK         | 1339.79 | 1341.77 | -1.98  | -1475.92  | 8.E-06 |
| P05787 | LEAELGNMQGLVEDFK    | 1807.87 | 1791.87 | 16.00  | 8847.52   | 8.E-06 |
| P05787 | LEAELGNMQGLVEDFK    | 1807.83 | 1791.87 | 15.96  | 8828.33   | 8.E-06 |
| Q59EM9 | QLENGRTLSDYNIQK     | 1761.86 | 1777.90 | -16.04 | -9105.05  | 8.E-06 |
| P05787 | LVSESSDVLPK         | 1175.64 | 1172.63 | 3.01   | 2561.88   | 8.E-06 |
| P60709 | QEYDESGPSIVHRK      | 1626.77 | 1643.79 | -17.02 | -10463.30 | 8.E-06 |
| Q9BZJ0 | NRTVISNWIK          | 1236.73 | 1229.69 | 7.04   | 5692.56   | 8.E-06 |
| Q9BZJ0 | NRTVISNWIK          | 1235.73 | 1229.69 | 6.04   | 4885.52   | 8.E-06 |

|        |                                    |         |         |         |            |        |
|--------|------------------------------------|---------|---------|---------|------------|--------|
| Q9UHX1 | (41)ATATIALQVNGQQGGGSEPAAAAVVAAGDK | 2836.42 | 2835.44 | 0.98    | 345.60     | 9.E-06 |
| Q9NR30 | DAIRLLDSVPPTAISHFK                 | 1979.08 | 1979.08 | 0.00    | 0.32       | 9.E-06 |
| Q15424 | ELPEQLQEHAIEDK                     | 1677.83 | 1677.82 | 0.01    | 3.13       | 9.E-06 |
| P15880 | SLEEIYLFSLPIK                      | 1551.86 | 1550.86 | 1.00    | 646.54     | 9.E-06 |
| O60812 | VDSLLENLEK                         | 1160.64 | 1158.61 | 2.03    | 1747.40    | 9.E-06 |
| P07355 | PLYFADRLYDSMK                      | 1633.79 | 1617.79 | 16.00   | 9792.30    | 9.E-06 |
| Q8N1F7 | DNALLSAIEESRK                      | 1445.75 | 1444.75 | 1.00    | 693.93     | 9.E-06 |
| P33992 | SIAPSIFGGTDMK                      | 1325.77 | 1322.65 | 3.12    | 2356.12    | 9.E-06 |
| P04792 | LATQSNEITIPVTFESRAQLGGPEAAK        | 2837.36 | 2827.47 | 9.89    | 3486.64    | 9.E-06 |
| Q02539 | NNSRIKLGK                          | 1142.68 | 1141.69 | 0.99    | 862.69     | 9.E-06 |
| P18124 | RIALTDNALIARSLGK                   | 1704.99 | 1711.01 | -6.02   | -3532.06   | 9.E-06 |
| Q9NR30 | DLIAQARTGTGK                       | 1229.67 | 1229.67 | 0.00    | 0.75       | 9.E-06 |
| Q6ECI4 | KSLKTHSVVKK                        | 1148.59 | 1253.78 | -105.19 | -91580.10  | 9.E-06 |
| Q6ECI4 | KSLKTHSVVKK                        | 1143.70 | 1253.78 | -110.08 | -96251.80  | 9.E-06 |
| Q6ECI4 | KSLKTHSVVKK                        | 1138.59 | 1253.78 | -115.19 | -101164.00 | 9.E-06 |

|        |                                |         |         |        |           |        |
|--------|--------------------------------|---------|---------|--------|-----------|--------|
| Q562T7 | EHPMLLTEAPLNPK                 | 1570.71 | 1588.83 | -18.12 | -11533.60 | 1.E-05 |
| P02545 | ERARLQLELSK                    | 1346.72 | 1341.77 | 4.95   | 3674.46   | 1.E-05 |
| Q9BQG0 | ADLNIISSPEQLELFLLAQK           | 2487.29 | 2482.37 | 4.92   | 1979.16   | 1.E-05 |
| Q9BQG0 | ADLNIISSPEQLELFLLAQK           | 2482.37 | 2482.37 | 0.00   | 1.03      | 1.E-05 |
| Q00839 | SSGPTSLFAVTVAPPGARQQQQAGGK     | 2596.34 | 2596.34 | 0.00   | 1.84      | 1.E-05 |
| Q08170 | DYMRQAGEVYADAHK                | 1848.96 | 1853.84 | -4.88  | -2639.94  | 1.E-05 |
| P13645 | NQILNLTDDNANILLQIDNARLAADDFRLK | 3398.86 | 3395.82 | 3.04   | 894.46    | 1.E-05 |
| O43818 | AEARAFEEDQVAGRLK               | 1789.85 | 1788.91 | 0.94   | 527.91    | 1.E-05 |
| O43818 | AEARAFEEDQVAGRLK               | 1788.92 | 1788.91 | 0.01   | 3.57      | 1.E-05 |
| Q8N1F7 | DNALLSAIEESRK                  | 1444.80 | 1444.75 | 0.05   | 33.19     | 1.E-05 |
| P19388 | IIRPSETAGRYITYRLVQ             | 2135.19 | 2135.19 | 0.00   | 0.89      | 1.E-05 |
| O15504 | IPLKPPPLELLNV                  | 1441.89 | 1441.89 | 0.00   | 2.71      | 1.E-05 |
| A3R0T7 | AVTASKERSGVSLAALK              | 1691.87 | 1686.96 | 4.91   | 2903.88   | 1.E-05 |
| P61247 | VERADGYEPPVQESV                | 1673.79 | 1673.79 | 0.00   | 0.93      | 1.E-05 |
| P09651 | RAVSREDSQRPGAHLTVK             | 2006.08 | 2006.08 | 0.00   | 1.18      | 1.E-05 |

|        |                           |         |         |         |            |        |
|--------|---------------------------|---------|---------|---------|------------|--------|
| P20700 | DAALATALGDKK              | 1176.67 | 1172.64 | 4.03    | 3426.90    | 1.E-05 |
| P20700 | DAALATALGDKK              | 1176.66 | 1172.64 | 4.02    | 3413.60    | 1.E-05 |
| P20700 | DAALATALGDKK              | 1172.64 | 1172.64 | 0.00    | 0.46       | 1.E-05 |
| P68104 | DGNASGTTLLEALDCILPPTRPTDK | 2661.36 | 2654.32 | 7.04    | 2644.70    | 1.E-05 |
| P62736 | EITALAPSTMK               | 1179.61 | 1160.61 | 19.00   | 16104.80   | 1.E-05 |
| P62736 | EITALAPSTMK               | 1176.61 | 1160.61 | 16.00   | 13595.70   | 1.E-05 |
| P62736 | EITALAPSTMK               | 1176.59 | 1160.61 | 15.98   | 13584.00   | 1.E-05 |
| P62736 | EITALAPSTMK               | 1172.64 | 1160.61 | 12.03   | 10260.40   | 1.E-05 |
| P07305 | GVGASGSFRLAK              | 1148.68 | 1148.63 | 0.05    | 41.63      | 1.E-05 |
| Q13727 | VDIDVPDVNIEGPDAK          | 1694.84 | 1694.84 | 0.00    | 1.45       | 1.E-05 |
| Q562R8 | IWHHTFYNK                 | 1127.53 | 1244.61 | -117.08 | -103840.00 | 1.E-05 |
| Q562R8 | IWHHTFYNK                 | 1122.59 | 1244.61 | -122.02 | -108690.00 | 1.E-05 |
| Q562R8 | IWHHTFYNK                 | 1122.56 | 1244.61 | -122.05 | -108726.00 | 1.E-05 |
| Q02539 | NNSRIKLGIK                | 1141.69 | 1141.69 | 0.00    | 1.12       | 1.E-05 |
| Q9UQE7 | ALDQFVNFSEQK              | 1424.69 | 1424.69 | 0.00    | 1.00       | 1.E-05 |

|        |                                    |         |         |       |          |        |
|--------|------------------------------------|---------|---------|-------|----------|--------|
| O60812 | VDSLLENLEK                         | 1158.61 | 1158.61 | 0.00  | 1.04     | 1.E-05 |
| P06748 | VDNDENEHQLSLRTVSLGAGAK             | 2357.12 | 2352.17 | 4.95  | 2101.24  | 1.E-05 |
| P68104 | GSF(75)KYAWVLDK                    | 1341.77 | 1340.71 | 1.06  | 792.87   | 1.E-05 |
| O14979 | VFVGGLSPDTSEEQIK                   | 1704.86 | 1704.86 | 0.00  | 0.30     | 1.E-05 |
| P45973 | GFSEEHNTWEPEK                      | 1592.85 | 1588.68 | 4.17  | 2620.85  | 1.E-05 |
| P62736 | EITALAPSTMK                        | 1179.61 | 1160.61 | 19.00 | 16105.40 | 1.E-05 |
| P62736 | EITALAPSTMK                        | 1176.62 | 1160.61 | 16.01 | 13610.70 | 1.E-05 |
| P62736 | EITALAPSTMK                        | 1176.61 | 1160.61 | 16.00 | 13595.50 | 1.E-05 |
| P62736 | EITALAPSTMK                        | 1176.59 | 1160.61 | 15.98 | 13583.00 | 1.E-05 |
| P62736 | EITALAPSTMK                        | 1172.64 | 1160.61 | 12.03 | 10260.80 | 1.E-05 |
| Q12906 | PAVVAPAPVVEAVSTPSAAFPSDATAEQGPILTK | 3287.73 | 3287.73 | 0.00  | 0.38     | 1.E-05 |
| Q53G99 | DLYANTVLSGGTTMYPGIADRMK            | 2633.26 | 2629.30 | 3.96  | 1503.76  | 1.E-05 |
| O60506 | ALLERTGYTLDVTTGQRK                 | 2021.09 | 2021.09 | 0.00  | 1.03     | 1.E-05 |
| A6NJC9 | STYQEFTDHLVK                       | 1469.76 | 1466.70 | 3.06  | 2080.10  | 1.E-05 |
| P62736 | EITALAPSTMK                        | 1179.92 | 1160.61 | 19.31 | 16362.90 | 1.E-05 |



|        |                       |         |         |       |          |        |
|--------|-----------------------|---------|---------|-------|----------|--------|
| P62736 | EITALAPSTMK           | 1179.92 | 1160.61 | 19.31 | 16362.90 | 1.E-05 |
| P62736 | EITALAPSTMK           | 1176.61 | 1160.61 | 16.00 | 13597.50 | 1.E-05 |
| P62736 | EITALAPSTMK           | 1173.32 | 1160.61 | 12.71 | 10831.90 | 1.E-05 |
| P62736 | EITALAPSTMK           | 1173.32 | 1160.61 | 12.71 | 10831.90 | 1.E-05 |
| P62736 | EITALAPSTMK           | 1172.64 | 1160.61 | 12.03 | 10261.40 | 1.E-05 |
| P02545 | ERARLQLELSK           | 1340.72 | 1341.77 | -1.05 | -785.49  | 1.E-05 |
| P62736 | EITALAPSTMK           | 1179.61 | 1160.61 | 19.00 | 16104.60 | 1.E-05 |
| P62736 | EITALAPSTMK           | 1176.62 | 1160.61 | 16.01 | 13610.40 | 1.E-05 |
| P62736 | EITALAPSTMK           | 1176.61 | 1160.61 | 16.00 | 13595.10 | 1.E-05 |
| P62736 | EITALAPSTMK           | 1176.59 | 1160.61 | 15.98 | 13583.00 | 1.E-05 |
| P62736 | EITALAPSTMK           | 1176.58 | 1160.61 | 15.97 | 13573.20 | 1.E-05 |
| P62736 | EITALAPSTMK           | 1172.64 | 1160.61 | 12.03 | 10260.20 | 1.E-05 |
| P05787 | LLEGEESRLESGMQNMSIHTK | 2423.17 | 2388.14 | 35.03 | 14457.60 | 1.E-05 |
| P05787 | LLEGEESRLESGMQNMSIHTK | 2420.13 | 2388.14 | 31.99 | 13219.60 | 1.E-05 |
| P05787 | LLEGEESRLESGMQNMSIHTK | 2420.09 | 2388.14 | 31.95 | 13202.20 | 1.E-05 |

|        |                       |         |         |        |           |        |
|--------|-----------------------|---------|---------|--------|-----------|--------|
| Q59EM9 | QLENGRTLSDYNIQK       | 1761.86 | 1777.90 | -16.04 | -9103.73  | 1.E-05 |
| P16401 | ATGPPVSELITK          | 1212.68 | 1211.68 | 1.00   | 827.57    | 1.E-05 |
| P60709 | QEYDESGPSIVHRK        | 1626.77 | 1643.79 | -17.02 | -10463.30 | 1.E-05 |
| Q13765 | NILFVITKPDVYK         | 1548.89 | 1548.89 | 0.00   | 1.46      | 1.E-05 |
| O60506 | ALLERTGYTLDVTTGQRK    | 2021.09 | 2021.09 | 0.00   | 0.63      | 1.E-05 |
| Q9NR30 | DLIAQARTGTGK          | 1233.67 | 1229.67 | 4.00   | 3241.00   | 1.E-05 |
| P09661 | NAIANASTLAEVERLK      | 1698.93 | 1698.93 | 0.00   | 0.23      | 1.E-05 |
| P04083 | GLGTDEDTLIEILASRTNK   | 2045.06 | 2045.06 | 0.00   | 0.62      | 1.E-05 |
| P02545 | ERARLQLELSK           | 1341.77 | 1341.77 | 0.00   | 0.06      | 1.E-05 |
| P46782 | YLPHSAGRYAAK          | 1389.71 | 1332.69 | 57.02  | 41032.10  | 1.E-05 |
| P84090 | (51)SHTILLVQPTK       | 1281.75 | 1277.73 | 4.02   | 3133.64   | 1.E-05 |
| P84090 | (51)SHTILLVQPTK       | 1278.62 | 1277.73 | 0.89   | 696.64    | 1.E-05 |
| Q5HYM7 | QNASLQAAITDAEQRGELALK | 2225.08 | 2226.16 | -1.08  | -484.38   | 1.E-05 |
| P20700 | DAALATALGDKK          | 1176.61 | 1172.64 | 3.97   | 3372.94   | 1.E-05 |
| Q13765 | NILFVITKPDVYK         | 1552.89 | 1548.89 | 4.00   | 2575.75   | 1.E-05 |

|        |                          |         |         |         |            |        |
|--------|--------------------------|---------|---------|---------|------------|--------|
| P62736 | EITALAPSTMK              | 1178.60 | 1160.61 | 17.99   | 15266.00   | 1.E-05 |
| P62736 | EITALAPSTMK              | 1178.60 | 1160.61 | 17.99   | 15266.00   | 1.E-05 |
| P62736 | EITALAPSTMK              | 1176.61 | 1160.61 | 16.00   | 13595.10   | 1.E-05 |
| Q15459 | EDSAPSKPVVGIIPPPEVRNIVDK | 2725.48 | 2718.46 | 7.02    | 2576.80    | 1.E-05 |
| Q09666 | AGLRVSAPEVSVGHK          | 1506.79 | 1505.83 | 0.96    | 636.40     | 1.E-05 |
| Q09666 | AGLRVSAPEVSVGHK          | 1505.83 | 1505.83 | 0.00    | 2.53       | 1.E-05 |
| Q09666 | AGLRVSAPEVSVGHK          | 1503.78 | 1505.83 | -2.05   | -1366.28   | 1.E-05 |
| Q09666 | AEGPEVDVNLPK             | 1266.65 | 1266.65 | 0.00    | 2.73       | 2.E-05 |
| Q09666 | AEGPEVDVNLPK             | 1263.61 | 1266.65 | -3.04   | -2402.04   | 2.E-05 |
| Q9P0K7 | TALHYAAAQGCLQAVQILCEHK   | 2199.05 | 2481.23 | -282.18 | -128318.00 | 2.E-05 |
| P62736 | EITALAPSTMK              | 1179.61 | 1160.61 | 19.00   | 16105.50   | 2.E-05 |
| P62736 | EITALAPSTMK              | 1176.61 | 1160.61 | 16.00   | 13595.60   | 2.E-05 |
| P62736 | EITALAPSTMK              | 1172.64 | 1160.61 | 12.03   | 10260.40   | 2.E-05 |
| Q8WUM0 | ALQRDNWSSSDGKDDPIEVSK    | 2358.14 | 2346.11 | 12.03   | 5099.61    | 2.E-05 |
| P20700 | HETRLVEVDSGRQIEYKYK      | 2351.16 | 2350.16 | 1.00    | 425.62     | 2.E-05 |

|        |                         |         |         |       |          |        |
|--------|-------------------------|---------|---------|-------|----------|--------|
| P32969 | GVTLGFRYK               | 1039.58 | 1039.58 | 0.00  | 1.21     | 2.E-05 |
| P20700 | ALYETELADARRALDDTARERAK | 2634.35 | 2633.35 | 1.00  | 380.90   | 2.E-05 |
| P16401 | ATGPPVSELITK            | 1215.63 | 1211.68 | 3.95  | 3248.27  | 2.E-05 |
| P16401 | ATGPPVSELITK            | 1211.55 | 1211.68 | -0.13 | -111.37  | 2.E-05 |
| Q96GM8 | RALLNLPGTQTSGEAK        | 1656.79 | 1654.90 | 1.89  | 1139.25  | 2.E-05 |
| Q96GM8 | RALLNLPGTQTSGEAK        | 1654.90 | 1654.90 | 0.00  | 2.72     | 2.E-05 |
| Q09666 | AEGPEVDVNLPK            | 1266.65 | 1266.65 | 0.00  | 2.41     | 2.E-05 |
| P19388 | EEVTELLARYK             | 1350.72 | 1349.72 | 1.00  | 743.64   | 2.E-05 |
| A4D111 | LMELHGDSSSSGK           | 1348.68 | 1346.61 | 2.07  | 1533.41  | 2.E-05 |
| P14136 | VRFLEQQNK               | 1160.63 | 1160.63 | 0.00  | 2.68     | 2.E-05 |
| P02545 | ERARLQLELSK             | 1341.77 | 1341.77 | 0.00  | 0.50     | 2.E-05 |
| P84090 | (51)SHTILLVQPTK         | 1277.73 | 1277.73 | 0.00  | 1.60     | 2.E-05 |
| P62736 | EITALAPSTMK             | 1176.57 | 1160.61 | 15.96 | 13568.30 | 2.E-05 |
| P62736 | EITALAPSTMK             | 1173.65 | 1160.61 | 13.04 | 11106.50 | 2.E-05 |
| P02545 | ERARLQLELSK             | 1339.79 | 1341.77 | -1.98 | -1475.47 | 2.E-05 |

|        |                         |         |         |       |          |        |
|--------|-------------------------|---------|---------|-------|----------|--------|
| Q13727 | VDIDVPDVNIEGPDAK        | 1698.76 | 1694.84 | 3.92  | 2308.66  | 2.E-05 |
| Q13727 | VDIDVPDVNIEGPDAK        | 1695.85 | 1694.84 | 1.01  | 592.95   | 2.E-05 |
| P32969 | GVTLGFRYK               | 1044.56 | 1039.58 | 4.98  | 4768.75  | 2.E-05 |
| P32969 | GVTLGFRYK               | 1043.61 | 1039.58 | 4.03  | 3860.69  | 2.E-05 |
| P32969 | GVTLGFRYK               | 1039.58 | 1039.58 | 0.00  | 1.30     | 2.E-05 |
| P32969 | GVTLGFRYK               | 1039.57 | 1039.58 | -0.01 | -9.95    | 2.E-05 |
| Q07020 | GCGTVLLSGPRK            | 1261.72 | 1243.67 | 18.05 | 14307.30 | 2.E-05 |
| Q07020 | GCGTVLLSGPRK            | 1259.71 | 1243.67 | 16.04 | 12736.30 | 2.E-05 |
| P20700 | ALYETELADARRALDDTARERAK | 2633.35 | 2633.35 | 0.00  | 0.42     | 2.E-05 |
| P19338 | EVFEDAAEIRLVSK          | 1604.84 | 1604.84 | 0.00  | -0.65    | 2.E-05 |
| O95785 | EVVAGAPRPGLLSLAK        | 1578.84 | 1576.93 | 1.91  | 1208.15  | 2.E-05 |
| O95785 | EVVAGAPRPGLLSLAK        | 1578.72 | 1576.93 | 1.79  | 1132.61  | 2.E-05 |
| O95785 | EVVAGAPRPGLLSLAK        | 1576.93 | 1576.93 | 0.00  | 0.24     | 2.E-05 |
| Q9UQE7 | ALDQFVNFSEQK            | 1419.81 | 1424.69 | -4.88 | -3440.02 | 2.E-05 |
| P18621 | EQIVPKPEEEVAQK          | 1622.85 | 1622.85 | 0.00  | 0.55     | 2.E-05 |

|        |                                                                |         |         |         |            |        |
|--------|----------------------------------------------------------------|---------|---------|---------|------------|--------|
| A6NGR5 | EVATAIRGAILAKLSIVPVHRGYWGNK                                    | 2856.64 | 3031.74 | -175.10 | -61294.20  | 2.E-05 |
| P08107 | NQVALNPQNTVFDK                                                 | 1657.85 | 1657.84 | 0.01    | 3.22       | 2.E-05 |
| A6NJC9 | STYQEFTDHLVK                                                   | 1469.76 | 1466.70 | 3.06    | 2080.58    | 2.E-05 |
| A6NJC9 | STYQEFTDHLVK                                                   | 1469.76 | 1466.70 | 3.06    | 2080.31    | 2.E-05 |
| P31946 | AVTEQGHELSNEERNLLSVAYK                                         | 2486.24 | 2486.24 | 0.00    | 0.48       | 2.E-05 |
| P32969 | DELILEGNDIELVSNSAALIQQATTVK                                    | 2883.51 | 2883.51 | 0.00    | -0.85      | 2.E-05 |
| Q3SX59 | LEESTMLPSMLLALL                                                | 1674.81 | 1659.88 | 14.93   | 8913.66    | 2.E-05 |
| P02545 | ERARLQLELSK                                                    | 1341.77 | 1341.77 | 0.00    | 0.43       | 2.E-05 |
| P61978 | KIIPTLEEGQLPSPTATSQLPLESDAVECLNYQHVK                           | 4068.05 | 4182.12 | -114.07 | -28040.50  | 2.E-05 |
| P40429 | VFDGIPPPYDK                                                    | 1246.62 | 1246.62 | 0.00    | 0.44       | 2.E-05 |
| P40429 | VFDGIPPPYDK                                                    | 1246.60 | 1246.62 | -0.02   | -13.60     | 2.E-05 |
| P40429 | VFDGIPPPYDK                                                    | 1246.59 | 1246.62 | -0.03   | -24.67     | 2.E-05 |
| P40429 | VFDGIPPPYDK                                                    | 1246.58 | 1246.62 | -0.04   | -33.58     | 2.E-05 |
| Q9P0K7 | TALHYAAAQGCLQAVQILCEHK                                         | 2199.05 | 2481.23 | -282.18 | -128318.00 | 2.E-05 |
| P38159 | R(37)SAPSGPVRSSSGMGGRAPVSRGRDSYGGPPRREPLP<br>SRRDVYLSPRDDGYSTK | 5844.95 | 5865.87 | -20.92  | -3579.99   | 2.E-05 |

|        |                                |         |         |       |          |        |
|--------|--------------------------------|---------|---------|-------|----------|--------|
| P02545 | LESTESRSSFSQHARTSGRVAVEEVDEEGK | 3306.57 | 3306.57 | 0.00  | -1.39    | 2.E-05 |
| P62736 | EITALAPSTMK                    | 1179.61 | 1160.61 | 19.00 | 16104.20 | 2.E-05 |
| P62736 | EITALAPSTMK                    | 1177.58 | 1160.61 | 16.97 | 14413.60 | 2.E-05 |
| P62736 | EITALAPSTMK                    | 1176.65 | 1160.61 | 16.04 | 13631.00 | 2.E-05 |
| P62736 | EITALAPSTMK                    | 1176.61 | 1160.61 | 16.00 | 13595.20 | 2.E-05 |
| P62736 | EITALAPSTMK                    | 1176.59 | 1160.61 | 15.98 | 13582.20 | 2.E-05 |
| P62736 | EITALAPSTMK                    | 1176.58 | 1160.61 | 15.97 | 13572.50 | 2.E-05 |
| P62736 | EITALAPSTMK                    | 1176.57 | 1160.61 | 15.96 | 13567.90 | 2.E-05 |
| P62736 | EITALAPSTMK                    | 1172.64 | 1160.61 | 12.03 | 10260.00 | 2.E-05 |
| Q99729 | FGEVVDCTIK                     | 1166.56 | 1166.56 | 0.00  | 2.80     | 2.E-05 |
| Q99729 | FGEVVDCTIK                     | 1164.56 | 1166.56 | -2.00 | -1713.11 | 2.E-05 |
| O60506 | ALLERTGYTLDVTTGQRK             | 2026.98 | 2021.09 | 5.89  | 2904.41  | 2.E-05 |
| P84090 | IYVLLRRQAQQAGK                 | 1642.96 | 1642.96 | 0.00  | 0.31     | 2.E-05 |
| P20700 | ALYETELADARRALDDTARERAK        | 2633.35 | 2633.35 | 0.00  | 0.54     | 3.E-05 |
| Q9UQE7 | LDVRDTAYPETNDAIPMISK           | 2264.10 | 2248.10 | 16.00 | 7066.45  | 3.E-05 |

|        |                                |         |         |         |           |        |
|--------|--------------------------------|---------|---------|---------|-----------|--------|
| Q59EM9 | QLENGRTLSDYNIQK                | 1778.89 | 1777.90 | 0.99    | 553.85    | 3.E-05 |
| Q03252 | ALYESELADARRVLDETARERARLQIEIGK | 3470.86 | 3470.86 | 0.00    | -0.64     | 3.E-05 |
| P16401 | ATGPPVSELITK                   | 1211.65 | 1211.68 | -0.03   | -21.81    | 3.E-05 |
| P16401 | ATGPPVSELITK                   | 1211.55 | 1211.68 | -0.13   | -110.54   | 3.E-05 |
| O75475 | GYPHWPARVDEVPDGAVKPPTNK        | 2532.32 | 2529.28 | 3.04    | 1198.87   | 3.E-05 |
| P07355 | DIISDTSGDFRK                   | 1356.65 | 1352.66 | 3.99    | 2937.70   | 3.E-05 |
| Q14684 | TPTSSPASSPLVAK                 | 1342.72 | 1341.71 | 1.01    | 748.72    | 3.E-05 |
| P14923 | RVSVELTNSLFK                   | 1391.78 | 1391.78 | 0.00    | 0.11      | 3.E-05 |
| P16403 | ERSGVSLAALK                    | 1130.65 | 1129.65 | 1.00    | 888.26    | 3.E-05 |
| P16403 | ERSGVSLAALK                    | 1127.63 | 1129.65 | -2.02   | -1787.02  | 3.E-05 |
| O00267 | FIAYQFTDTPLIQKSVVAPEHVK        | 2536.33 | 2630.41 | -94.08  | -37091.10 | 3.E-05 |
| Q00839 | RNFILDQTNVSAQAQRK              | 2088.13 | 2087.13 | 1.00    | 480.62    | 3.E-05 |
| P05388 | IIQLDDYPK                      | 1216.67 | 1216.67 | 0.00    | 1.30      | 3.E-05 |
| Q13838 | KNCPHIVVGTGPRILALARNK          | 2199.25 | 2313.32 | -114.07 | -51869.60 | 3.E-05 |
| Q13111 | LIQARLPFK                      | 1088.62 | 1084.68 | 3.94    | 3623.33   | 3.E-05 |



|        |                        |         |         |        |           |        |
|--------|------------------------|---------|---------|--------|-----------|--------|
| Q9Y3Y2 | GHLDAELDAYMAQTDPETND   | 2209.35 | 2204.92 | 4.43   | 2006.71   | 3.E-05 |
| P02545 | LRDLEDGLARERDTSRRLLAEK | 2641.43 | 2641.43 | 0.00   | -0.09     | 3.E-05 |
| P62701 | TGENFRLIYDTK           | 1455.74 | 1455.74 | 0.00   | 0.57      | 3.E-05 |
| P62906 | AVDIPHMDIEALK          | 1450.75 | 1450.75 | 0.00   | -0.25     | 3.E-05 |
| P62736 | EITALAPSTMK            | 1179.61 | 1160.61 | 19.00  | 16105.70  | 3.E-05 |
| P62736 | EITALAPSTMK            | 1176.61 | 1160.61 | 16.00  | 13595.90  | 3.E-05 |
| P62736 | EITALAPSTMK            | 1176.59 | 1160.61 | 15.98  | 13583.40  | 3.E-05 |
| P62736 | EITALAPSTMK            | 1176.58 | 1160.61 | 15.97  | 13572.30  | 3.E-05 |
| P08107 | HWPFQVINDGDKPK         | 1679.84 | 1679.84 | 0.00   | 1.28      | 3.E-05 |
| P41219 | MALDIEIATYRK           | 1438.75 | 1422.75 | 16.00  | 11119.50  | 3.E-05 |
| P08758 | VLTEIIASRTPEELRAIK     | 2038.18 | 2038.18 | 0.00   | 1.67      | 3.E-05 |
| P84090 | MSHTILLVQPTK           | 1334.75 | 1366.76 | -32.01 | -23980.10 | 3.E-05 |
| P16401 | ATGPPVSELITK           | 1215.63 | 1211.68 | 3.95   | 3248.92   | 3.E-05 |
| P16401 | ATGPPVSELITK           | 1211.68 | 1211.68 | 0.00   | 0.89      | 3.E-05 |
| P62736 | EITALAPSTMK            | 1180.61 | 1160.61 | 20.00  | 16938.80  | 3.E-05 |

|        |                         |         |         |         |           |        |
|--------|-------------------------|---------|---------|---------|-----------|--------|
| P62736 | EITALAPSTMK             | 1177.58 | 1160.61 | 16.97   | 14411.50  | 3.E-05 |
| P62736 | EITALAPSTMK             | 1176.66 | 1160.61 | 16.05   | 13639.50  | 3.E-05 |
| P62736 | EITALAPSTMK             | 1176.65 | 1160.61 | 16.04   | 13635.30  | 3.E-05 |
| P62736 | EITALAPSTMK             | 1176.61 | 1160.61 | 16.00   | 13595.10  | 3.E-05 |
| P62736 | EITALAPSTMK             | 1176.59 | 1160.61 | 15.98   | 13582.50  | 3.E-05 |
| P62736 | EITALAPSTMK             | 1173.65 | 1160.61 | 13.04   | 11106.70  | 3.E-05 |
| P06748 | MSVQPTVSLGGFEITPPVVLRLK | 2467.39 | 2467.39 | 0.00    | 1.42      | 3.E-05 |
| Q13243 | DFMRQAGEVTFADAHRPK      | 2091.00 | 2075.00 | 16.00   | 7650.25   | 3.E-05 |
| P20700 | ALYETELADARRALDDTARERAK | 2633.35 | 2633.35 | 0.00    | 1.37      | 3.E-05 |
| P63220 | (49)MQNDAGEFVDLYVPRK    | 1938.92 | 1922.92 | 16.00   | 8251.02   | 3.E-05 |
| P08579 | MRGQAFVIFK              | 1198.71 | 1195.65 | 3.06    | 2554.01   | 3.E-05 |
| Q9BQ39 | SRYEQVDLVGK             | 1297.66 | 1292.67 | 4.99    | 3846.26   | 3.E-05 |
| Q59EM9 | QLENGRTLSDYNIQK         | 1761.86 | 1777.90 | -16.04  | -9103.44  | 4.E-05 |
| P02545 | EELDFQKNIYSEELRETK      | 2081.14 | 2270.11 | -188.97 | -90799.50 | 4.E-05 |
| Q8IV61 | AAKDKGFAKWENEK          | 1620.82 | 1620.83 | -0.01   | -3.43     | 4.E-05 |

|        |                                |         |         |        |          |        |
|--------|--------------------------------|---------|---------|--------|----------|--------|
| P78316 | RFGEYNSNMSPEEKMMK              | 2217.03 | 2076.91 | 140.12 | 63201.80 | 4.E-05 |
| P02545 | LESTESRSSFSQHARTSGRVAVEEVDEEGK | 3306.57 | 3306.57 | 0.00   | -0.30    | 4.E-05 |
| P06748 | DELHIVEAEAMNYEGSPIK            | 2217.03 | 2144.01 | 73.02  | 32934.80 | 4.E-05 |
| P10809 | FDRGYISPYFINTSK                | 1807.87 | 1806.89 | 0.98   | 540.99   | 4.E-05 |
| P20700 | ESRACLERIQUELEDLLAK            | 2172.14 | 2172.12 | 0.02   | 10.67    | 4.E-05 |
| P20700 | ESRACLERIQUELEDLLAK            | 2170.08 | 2172.12 | -2.04  | -941.82  | 4.E-05 |
| P36578 | MINTDLSRILK                    | 1320.72 | 1302.73 | 17.99  | 13621.20 | 4.E-05 |
| P36578 | MINTDLSRILK                    | 1320.72 | 1302.73 | 17.99  | 13621.20 | 4.E-05 |
| P36578 | MINTDLSRILK                    | 1318.73 | 1302.73 | 16.00  | 12130.40 | 4.E-05 |
| P36578 | MINTDLSRILK                    | 1315.69 | 1302.73 | 12.96  | 9847.35  | 4.E-05 |
| P02545 | LESTESRSSFSQHARTSGRVAVEEVDEEGK | 3307.57 | 3306.57 | 1.00   | 302.52   | 4.E-05 |
| P62906 | FPSLLTHNENMVAK                 | 1618.82 | 1599.81 | 19.01  | 11740.40 | 4.E-05 |
| P62906 | FPSLLTHNENMVAK                 | 1615.81 | 1599.81 | 16.00  | 9899.72  | 4.E-05 |
| P08579 | MRGQAFVIFK                     | 1199.70 | 1195.65 | 4.05   | 3373.29  | 4.E-05 |
| P08579 | MRGQAFVIFK                     | 1196.66 | 1195.65 | 1.01   | 839.95   | 4.E-05 |

|        |                               |         |         |       |          |        |
|--------|-------------------------------|---------|---------|-------|----------|--------|
| P08758 | (41)AQVLRGTVTDFPGFDERADAETLRK | 2833.45 | 2833.44 | 0.01  | 4.78     | 4.E-05 |
| P62736 | EITALAPSTMK                   | 1179.61 | 1160.61 | 19.00 | 16103.80 | 4.E-05 |
| P62736 | EITALAPSTMK                   | 1177.63 | 1160.61 | 17.02 | 14450.50 | 4.E-05 |
| P62736 | EITALAPSTMK                   | 1177.58 | 1160.61 | 16.97 | 14412.60 | 4.E-05 |
| P62736 | EITALAPSTMK                   | 1176.65 | 1160.61 | 16.04 | 13631.30 | 4.E-05 |
| P62736 | EITALAPSTMK                   | 1176.61 | 1160.61 | 16.00 | 13595.20 | 4.E-05 |
| P62736 | EITALAPSTMK                   | 1176.59 | 1160.61 | 15.98 | 13582.30 | 4.E-05 |
| P62736 | EITALAPSTMK                   | 1176.58 | 1160.61 | 15.97 | 13572.00 | 4.E-05 |
| P62736 | EITALAPSTMK                   | 1176.58 | 1160.61 | 15.97 | 13572.00 | 4.E-05 |
| P62736 | EITALAPSTMK                   | 1176.57 | 1160.61 | 15.96 | 13563.10 | 4.E-05 |
| P62736 | EITALAPSTMK                   | 1172.64 | 1160.61 | 12.03 | 10259.80 | 4.E-05 |
| P02545 | AA YEAE LGDARK                | 1295.68 | 1292.64 | 3.04  | 2348.00  | 4.E-05 |
| P02545 | AA YEAE LGDARK                | 1294.78 | 1292.64 | 2.14  | 1649.52  | 4.E-05 |
| P02545 | AA YEAE LGDARK                | 1292.64 | 1292.64 | 0.00  | 0.58     | 4.E-05 |
| Q504R3 | NFFWMTDQEAIQDLWQWRK           | 2540.17 | 2541.19 | -1.02 | -402.23  | 4.E-05 |

|        |                      |         |         |        |           |        |
|--------|----------------------|---------|---------|--------|-----------|--------|
| P07355 | PLYFADRLYDSMK        | 1617.79 | 1617.79 | 0.00   | 0.74      | 4.E-05 |
| P07355 | DIISDTSGDFRK         | 1353.70 | 1352.66 | 1.04   | 767.84    | 4.E-05 |
| P07355 | DIISDTSGDFRK         | 1352.66 | 1352.66 | 0.00   | 3.04      | 4.E-05 |
| P07355 | TPAQYDASELK          | 1225.66 | 1221.59 | 4.07   | 3321.87   | 4.E-05 |
| P07355 | TPAQYDASELK          | 1221.59 | 1221.59 | 0.00   | 2.36      | 4.E-05 |
| P07355 | TPAQYDASELK          | 1220.70 | 1221.59 | -0.89  | -726.48   | 4.E-05 |
| Q13111 | LIQARLPFK            | 1084.68 | 1084.68 | 0.00   | 1.77      | 4.E-05 |
| Q9Y5S9 | NIHLNLDLDRRTGYLK     | 1711.95 | 1711.95 | 0.00   | 0.66      | 4.E-05 |
| P20700 | EELRELNDRDLAVYIDK    | 1975.04 | 1975.04 | 0.00   | 1.11      | 4.E-05 |
| Q562T7 | EHPMLLTEAPLNPK       | 1569.71 | 1588.83 | -19.12 | -12181.00 | 4.E-05 |
| Q562R8 | LRVAPEEHPVLLTEAPLNPK | 2227.07 | 2222.24 | 4.83   | 2167.49   | 4.E-05 |
| P02545 | LRDLEDLARERDTSRLLAEK | 2642.43 | 2641.43 | 1.00   | 380.17    | 4.E-05 |
| P08579 | MRGQAFVIFK           | 1211.65 | 1195.65 | 16.00  | 13201.60  | 4.E-05 |
| P08579 | MRGQAFVIFK           | 1209.73 | 1195.65 | 14.08  | 11636.00  | 4.E-05 |
| Q99733 | YAALYQPLFDK          | 1327.68 | 1327.68 | 0.00   | 3.00      | 4.E-05 |

|        |                     |         |         |       |          |        |
|--------|---------------------|---------|---------|-------|----------|--------|
| O60812 | QKVDSLLENLEK        | 1414.77 | 1414.77 | 0.00  | -0.59    | 4.E-05 |
| O00148 | FMQDPMEVFVDDETK     | 1850.81 | 1829.79 | 21.02 | 11357.70 | 5.E-05 |
| P46781 | AARELLTLDEK         | 1259.58 | 1257.69 | 1.89  | 1504.27  | 5.E-05 |
| P46781 | AARELLTLDEK         | 1257.69 | 1257.69 | 0.00  | 0.61     | 5.E-05 |
| P46781 | AARELLTLDEK         | 1257.67 | 1257.69 | -0.02 | -12.91   | 5.E-05 |
| P46781 | AARELLTLDEK         | 1256.63 | 1257.69 | -1.06 | -845.46  | 5.E-05 |
| P62701 | VRTDITYPAGFMDVISIDK | 2140.09 | 2140.09 | 0.00  | 0.37     | 5.E-05 |
| P62736 | EITALAPSTMK         | 1179.61 | 1160.61 | 19.00 | 16104.90 | 5.E-05 |
| P62736 | EITALAPSTMK         | 1179.61 | 1160.61 | 19.00 | 16104.70 | 5.E-05 |
| P62736 | EITALAPSTMK         | 1177.58 | 1160.61 | 16.97 | 14411.50 | 5.E-05 |
| P62736 | EITALAPSTMK         | 1176.65 | 1160.61 | 16.04 | 13630.90 | 5.E-05 |
| P62736 | EITALAPSTMK         | 1176.65 | 1160.61 | 16.04 | 13635.60 | 5.E-05 |
| P62736 | EITALAPSTMK         | 1176.61 | 1160.61 | 16.00 | 13595.30 | 5.E-05 |
| P62736 | EITALAPSTMK         | 1176.61 | 1160.61 | 16.00 | 13595.20 | 5.E-05 |
| P62736 | EITALAPSTMK         | 1176.59 | 1160.61 | 15.98 | 13582.50 | 5.E-05 |

|        |                                 |         |         |       |          |        |
|--------|---------------------------------|---------|---------|-------|----------|--------|
| P62736 | EITALAPSTMK                     | 1176.57 | 1160.61 | 15.96 | 13567.90 | 5.E-05 |
| P62736 | EITALAPSTMK                     | 1173.65 | 1160.61 | 13.04 | 11107.00 | 5.E-05 |
| P62736 | EITALAPSTMK                     | 1173.65 | 1160.61 | 13.04 | 11106.50 | 5.E-05 |
| Q03164 | TNLDLGPTAPSLEK                  | 1454.76 | 1454.76 | 0.00  | -0.10    | 5.E-05 |
| O75955 | QQIEEQRVQVQVVERAQQVAVQEQEIARREK | 3730.99 | 3730.98 | 0.01  | 1.97     | 5.E-05 |
| Q9NX63 | RRVAEELALEQAK                   | 1511.84 | 1511.84 | 0.00  | 0.43     | 5.E-05 |
| P16401 | ATGPPVSELITK                    | 1215.63 | 1211.68 | 3.95  | 3249.01  | 5.E-05 |
| P43243 | LCSLFYTNEEVAK                   | 1572.75 | 1572.75 | 0.00  | 1.03     | 5.E-05 |
| P43243 | LCSLFYTNEEVAK                   | 1569.79 | 1572.75 | -2.96 | -1885.84 | 5.E-05 |
| P52597 | HSGPNSADSANDGFVRLRGLPFGCTK      | 2759.33 | 2759.32 | 0.01  | 3.03     | 5.E-05 |
| Q8WYN9 | (49)MIPPDQQLIFAGK               | 1695.90 | 1654.89 | 41.01 | 24182.10 | 5.E-05 |
| Q8NC51 | KEETQPPVALK                     | 1238.69 | 1238.69 | 0.00  | 2.72     | 5.E-05 |
| Q8NC51 | KEETQPPVALK                     | 1237.57 | 1238.69 | -1.12 | -904.21  | 5.E-05 |
| O43143 | REVDDLGPVEVDIK                  | 1540.77 | 1540.77 | 0.00  | -0.10    | 5.E-05 |
| P62906 | NWQNVRALYIK                     | 1403.77 | 1403.77 | 0.00  | 1.10     | 5.E-05 |

|        |                 |         |         |        |           |        |
|--------|-----------------|---------|---------|--------|-----------|--------|
| P62906 | NWQNVRALYIK     | 1399.78 | 1403.77 | -3.99  | -2849.78  | 5.E-05 |
| Q99733 | YAALYQPLFDK     | 1328.74 | 1327.68 | 1.06   | 796.16    | 5.E-05 |
| Q99733 | YAALYQPLFDK     | 1326.77 | 1327.68 | -0.91  | -684.38   | 5.E-05 |
| Q9BQ39 | SRYEQVDLVGK     | 1296.68 | 1292.67 | 4.01   | 3090.01   | 5.E-05 |
| P62736 | EITALAPSTMK     | 1179.61 | 1160.61 | 19.00  | 16105.30  | 5.E-05 |
| P62736 | EITALAPSTMK     | 1176.61 | 1160.61 | 16.00  | 13595.90  | 5.E-05 |
| P62736 | EITALAPSTMK     | 1176.59 | 1160.61 | 15.98  | 13583.10  | 5.E-05 |
| P62736 | EITALAPSTMK     | 1176.58 | 1160.61 | 15.97  | 13572.60  | 5.E-05 |
| Q9NQZ2 | PVPQVDEAETRVVK  | 1565.84 | 1565.84 | 0.00   | 0.46      | 5.E-05 |
| Q5TAI8 | LGLKEVKSK       | 1000.63 | 1000.63 | 0.00   | 0.34      | 6.E-05 |
| P50914 | MTDFDRFK        | 1074.49 | 1058.49 | 16.00  | 14887.00  | 6.E-05 |
| P50914 | MTDFDRFK        | 1071.63 | 1058.49 | 13.14  | 12265.80  | 6.E-05 |
| P52799 | FLPGQGLVLPQIGDK | 1707.85 | 1743.96 | -36.11 | -21140.90 | 6.E-05 |
| P52799 | FLPGQGLVLPQIGDK | 1707.81 | 1743.96 | -36.15 | -21169.00 | 6.E-05 |
| P16401 | ATGPPVSELITK    | 1211.65 | 1211.68 | -0.03  | -22.30    | 6.E-05 |



|        |                                |         |         |         |           |        |
|--------|--------------------------------|---------|---------|---------|-----------|--------|
| P16401 | ATGPPVSELITK                   | 1211.55 | 1211.68 | -0.13   | -110.54   | 6.E-05 |
| Q6RFH5 | (41)AAAAARWNHVVWGTETGILK       | 2192.15 | 2192.15 | 0.00    | 1.89      | 6.E-05 |
| Q9BQ39 | SRYEQVDLVGK                    | 1292.67 | 1292.67 | 0.00    | 1.13      | 6.E-05 |
| Q9BQ39 | SRYEQVDLVGK                    | 1292.64 | 1292.67 | -0.03   | -27.03    | 6.E-05 |
| P02545 | LESTESRSSFSQHARTSGRVAVEEVDEEGK | 3306.57 | 3306.57 | 0.00    | 1.06      | 6.E-05 |
| Q15459 | EDSAPSKPVVGIYPPPEVRNIVDK       | 2725.48 | 2718.46 | 7.02    | 2577.17   | 6.E-05 |
| O75400 | EPAFEDITLESERK                 | 1662.81 | 1662.81 | 0.00    | 0.88      | 6.E-05 |
| Q59EM9 | QLENGRTLSDYNIQK                | 1761.86 | 1777.90 | -16.04  | -9103.84  | 6.E-05 |
| P20700 | EELRELNDR LAVYIDK              | 1975.04 | 1975.04 | 0.00    | 1.06      | 7.E-05 |
| P14136 | VRFLEQQNK                      | 1160.63 | 1160.63 | 0.00    | 2.50      | 7.E-05 |
| P78346 | (41)AVFADLDLRAGSDLK            | 1631.85 | 1631.85 | 0.00    | 0.57      | 7.E-05 |
| Q96LN8 | PSSLASNSAHRRSVGQASK            | 1837.91 | 1939.00 | -101.09 | -55002.00 | 7.E-05 |
| Q99733 | YAALYQPLFDK                    | 1329.79 | 1327.68 | 2.11    | 1586.33   | 7.E-05 |
| Q99733 | YAALYQPLFDK                    | 1328.83 | 1327.68 | 1.15    | 861.88    | 7.E-05 |
| P16401 | ATGPPVSELITK                   | 1211.68 | 1211.68 | 0.00    | 0.80      | 7.E-05 |

|        |                                        |         |         |        |           |        |
|--------|----------------------------------------|---------|---------|--------|-----------|--------|
| Q14566 | ATLNARTSILAAANPISGHYDRSK               | 2526.33 | 2526.33 | 0.00   | 0.10      | 7.E-05 |
| P02545 | LESTESRSSFSQHARTSGRVAVEEVDEEGK         | 3306.57 | 3306.57 | 0.00   | 0.85      | 7.E-05 |
| Q9NVP1 | NLQCLVIDEADRILDVGFEEELK                | 2731.38 | 2717.36 | 14.02  | 5133.29   | 8.E-05 |
| P04083 | GTDVNVFNTILTTRSYPQLRRVFQK              | 3108.60 | 2952.59 | 156.01 | 50185.50  | 8.E-05 |
| Q5TAI8 | LGLKEVKSK                              | 1005.55 | 1000.63 | 4.92   | 4889.24   | 8.E-05 |
| Q9NYF8 | STSEFIQHIVSLVHHVK                      | 2047.09 | 2047.09 | 0.00   | 0.96      | 8.E-05 |
| P02545 | LESTESRSSFSQHARTSGRVAVEEVDEEGK FVRLRNK | 4152.10 | 4220.13 | -68.03 | -16384.10 | 8.E-05 |
| P13645 | VRALEESNYELEGK                         | 1635.81 | 1635.81 | 0.00   | 2.82      | 8.E-05 |
| P06748 | MSVQPTVSLGGFEITPPVVLRLK                | 2467.39 | 2467.39 | 0.00   | 1.98      | 8.E-05 |
| Q8TEP8 | KDVLDFGDLTYGGWK                        | 1712.85 | 1712.84 | 0.01   | 3.07      | 8.E-05 |
| P16401 | ATGPPVSELITK                           | 1216.61 | 1211.68 | 4.93   | 4055.84   | 8.E-05 |
| P16401 | ATGPPVSELITK                           | 1213.55 | 1211.68 | 1.87   | 1542.89   | 8.E-05 |
| P16401 | ATGPPVSELITK                           | 1212.66 | 1211.68 | 0.98   | 805.49    | 8.E-05 |
| P16401 | ATGPPVSELITK                           | 1211.68 | 1211.68 | 0.00   | 0.89      | 8.E-05 |
| P02545 | AGQVVTIWAAGAGATHSPPTDLVWK              | 2533.32 | 2532.31 | 1.01   | 396.85    | 8.E-05 |

|        |                                |         |         |        |           |        |
|--------|--------------------------------|---------|---------|--------|-----------|--------|
| Q6P1K2 | LLDTMVDTLQK                    | 1428.80 | 1422.74 | 6.06   | 4238.29   | 8.E-05 |
| P08107 | EIAEAYLGYPTNAVITVPAYFNDSQRQATK | 3428.73 | 3428.73 | 0.00   | -0.14     | 8.E-05 |
| Q7Z3K9 | AELQLPPPPPGHYGAWAAQELQAK       | 2665.37 | 2665.37 | 0.00   | 1.72      | 9.E-05 |
| Q9H7L9 | RQLQLQEGTLQEYQK                | 1991.90 | 1989.03 | 2.87   | 1442.12   | 9.E-05 |
| O95678 | QCSSLQTAIADAEQRGELALK          | 2218.88 | 2288.14 | -69.26 | -31215.10 | 9.E-05 |
| P06396 | RYIETDPANRDRRTPITVVK           | 2399.30 | 2399.30 | 0.00   | 0.62      | 9.E-05 |
| Q5TAA0 | ADLEEVVRVCPGFK                 | 1691.90 | 1617.82 | 74.08  | 43784.00  | 9.E-05 |
| Q03701 | LYQHEINLFK                     | 1308.75 | 1303.69 | 5.06   | 3865.40   | 9.E-05 |
| P18621 | GLDVDSLVIHQVNK                 | 1783.97 | 1777.96 | 6.01   | 3371.20   | 9.E-05 |
| P08758 | PSRLYDAYELK                    | 1353.69 | 1353.69 | 0.00   | -0.03     | 9.E-05 |
| P02545 | LESTESRSSFSQHARTSGRVAVEEVDEEGK | 3306.57 | 3306.57 | 0.00   | 0.03      | 9.E-05 |
| P20700 | EELRELNDR LAVYIDK              | 1975.05 | 1975.04 | 0.01   | 2.63      | 9.E-05 |
| P40429 | VFDGIPPPYDK                    | 1247.65 | 1246.62 | 1.03   | 822.22    | 9.E-05 |
| P40429 | VFDGIPPPYDK                    | 1246.66 | 1246.62 | 0.04   | 30.84     | 9.E-05 |
| P40429 | VFDGIPPPYDK                    | 1246.62 | 1246.62 | 0.00   | 0.68      | 9.E-05 |

|        |                                      |         |         |        |          |        |
|--------|--------------------------------------|---------|---------|--------|----------|--------|
| P40429 | VFDGIPPPYDK                          | 1246.60 | 1246.62 | -0.02  | -13.12   | 9.E-05 |
| P40429 | VFDGIPPPYDK                          | 1246.59 | 1246.62 | -0.03  | -24.19   | 9.E-05 |
| P40429 | VFDGIPPPYDK                          | 1246.58 | 1246.62 | -0.04  | -28.20   | 9.E-05 |
| Q13838 | (41)AENDVDNELLDYEDDEVETAAGGDGAEAPAKK | 3391.48 | 3391.47 | 0.01   | 2.75     | 1.E-04 |
| P02545 | (44)ETPSQRRATRSGAQASSTPLSPTRITRLQEK  | 3598.86 | 3451.82 | 147.04 | 40855.90 | 1.E-04 |
| Q13769 | KTPNPANQYQFDK                        | 1549.75 | 1549.75 | 0.00   | 0.65     | 1.E-04 |
| Q13769 | KTPNPANQYQFDK                        | 1546.75 | 1549.75 | -3.00  | -1941.23 | 1.E-04 |
| P16401 | ATGPPVSELITK                         | 1215.63 | 1211.68 | 3.95   | 3248.84  | 1.E-04 |
| P16401 | ATGPPVSELITK                         | 1215.63 | 1211.68 | 3.95   | 3248.92  | 1.E-04 |
| P16401 | ATGPPVSELITK                         | 1211.68 | 1211.68 | 0.00   | 0.64     | 1.E-04 |
| P16401 | ATGPPVSELITK                         | 1211.65 | 1211.68 | -0.03  | -21.81   | 1.E-04 |
| P16401 | ATGPPVSELITK                         | 1211.55 | 1211.68 | -0.13  | -110.54  | 1.E-04 |
| Q03164 | TNLDLGPTAPSLEK                       | 1454.76 | 1454.76 | 0.00   | 0.38     | 1.E-04 |
| P60709 | (42)DDDIAALVVDNGSGMCK                | 1837.79 | 1820.79 | 17.00  | 9250.09  | 1.E-04 |
| P60709 | (42)DDDIAALVVDNGSGMCK                | 1834.81 | 1820.79 | 14.02  | 7640.80  | 1.E-04 |

Q9H9Y2 AAFFPPGFSISEIK

1433.76

1433.76

0.00

2.63

1.E-04
